# Supplementary material for: The diverging epigenomic landscapes of honeybee queens and workers revealed by multiomic sequencing
Source: Research Square preprint supplement (doi:10.21203/rs.3.rs-1629662/v1), 2022-05-11
Supplement: Supplementary file 1 [file 004e510b4ac507508be19e99.xlsx]

## Sheet: unique peaks for 4Q
Chromosome	PeakStart	PeakEnd	oriSummitPos	Count_4Q_1_AC	Count_4Q_1_In	Count_4Q_2_AC	Count_4Q_2_In	Count_4Q_3_AC	Count_4Q_3_In	Count_4W_1_AC	Count_4W_1_In	Count_4W_2_AC	Count_4W_2_In	Count_4W_3_AC	Count_4W_3_In	RPM_4Q_1_AC	RPM_4Q_1_In	RPM_4Q_2_AC	RPM_4Q_2_In	RPM_4Q_3_AC	RPM_4Q_3_In	RPM_4W_1_AC	RPM_4W_1_In	RPM_4W_2_AC	RPM_4W_2_In	RPM_4W_3_AC	RPM_4W_3_In	FoldEnrich_4Q_1_AC	FoldEnrich_4Q_2_AC	FoldEnrich_4Q_3_AC	FoldEnrich_4W_1_AC	FoldEnrich_4W_2_AC	FoldEnrich_4W_3_AC	log2foldchange	pvalue	qvalue	In_4Q_1_AC	In_4Q_2_AC	In_4Q_3_AC	In_4W_1_AC	In_4W_2_AC	In_4W_3_AC	annotation	geneStart	geneEnd	geneLength	geneStrand	geneId	transcriptId
NC_037645.1	470667	471198	470917;470976;470962	166	91	194	89	144	90	97	87	62	104	46	67	10.6179	5.0186	9.0831	5.112	7.4733	5.00227	5.35962	3.97848	3.20544	5.3655	2.38008	3.842	2.11571	1.77682	1.49398	1.34715	0.597417	0.61949	1.07092	0.0413763	1	+	+	+	-	-	-	Intron (XM_026442017.1/406072, intron 5 of 15)	431948	502528	70581	+	406072	NM_001011568.1
NC_037653.1	3992506	3992904	3992651;3992679;3992723	91	50	117	50	104	58	75	92	63	72	56	78	5.84936	2.78205	5.49644	2.8968	5.4117	3.24323	4.15644	4.20453	3.25632	3.7303	2.88648	4.4635	2.10254	1.89742	1.66861	0.988562	0.872938	0.646685	1.17634	0.00328126	1	+	+	+	-	-	-	Intron (XM_016916895.2/406077, intron 2 of 3)	3988955	4037081	48127	+	406077	XM_016916898.2
NC_037643.1	8698315	8698753	8698520;8698547;8698561	98	71	184	59	177	70	63	79	57	67	47	41	6.29442	3.9276	8.6173	3.408	9.17412	3.90287	3.50016	3.6168	2.95104	3.4748	2.43072	2.373	1.60261	2.52855	2.35061	0.96775	0.849269	1.02432	1.18982	0.0465465	1	+	+	+	-	-	-	Distal Intergenic	8673495	8675023	1529	+	406143	NM_001011616.2
NC_037647.1	11808179	11808694	11808419;11808468;11808355	160	82	156	80	137	68	69	103	75	90	43	64	10.2364	4.52765	7.31306	4.6008	7.11252	3.79293	3.8283	4.70184	3.86688	4.6501	2.22816	3.6725	2.26086	1.58952	1.8752	0.814213	0.831569	0.606715	1.3459	0.0174245	1	+	+	+	-	-	-	Intron (XM_391824.6/408271, intron 1 of 9)	11705264	11804631	99368	-	408271	XM_016914288.2
NC_037647.1	11767075	11767570	11767272;11767297;11767268	156	80	201	49	159	63	78	80	46	61	55	63	9.98206	4.41855	9.40916	2.84	8.2464	3.51808	4.32051	3.66201	2.39136	3.1682	2.83584	3.616	2.25913	3.31308	2.34401	1.17982	0.754801	0.784248	1.5418	0.0235046	1	+	+	+	-	-	-	Intron (XM_006569146.3/408271, intron 1 of 9)	11705264	11779163	73900	-	408271	XM_006569146.3
NC_037647.1	11212501	11213091	11212696;11212704;11212708	135	64	203	87	151	79	66	91	55	83	51	70	8.64688	3.54575	9.50232	4.9984	7.83408	4.3976	3.66423	4.15932	2.84928	4.2924	2.63328	4.0115	2.43866	1.90107	1.78144	0.880969	0.663796	0.656433	1.47552	0.014499	1	+	+	+	-	-	-	Promoter (2-3kb)	11108360	11210337	101978	-	408278	XM_026443347.1
NC_037648.1	2925167	2925642	2925243;2925552;2925425;2925348	138	84	152	69	135	73	108	78	74	82	53	52	8.83762	4.63675	7.12674	3.976	7.00944	4.06778	5.96121	3.57159	3.816	4.2413	2.73456	2.9945	1.90599	1.79244	1.72316	1.66906	0.899724	0.913194	0.638809	0.120493	1	+	+	+	-	-	-	Distal Intergenic	2936166	3249803	313638	+	408343	XM_016914894.2
NC_037648.1	13048670	13049977	13048911;13049409;13049858;13048816;13048981;13049462	327	204	249	132	385	155	246	234	160	220	155	190	20.8542	11.1828	11.645	7.5544	19.8944	8.57532	13.5084	10.6243	8.19168	11.2931	7.89984	10.7915	1.86485	1.54149	2.31996	1.27146	0.72537	0.732043	1.06929	0.027972	1	+	+	+	-	-	-	3' UTR	13043496	13045727	2232	+	408367	XM_391916.7
NC_037649.1	11106526	11107078	11106909;11106810;11106976	176	94	152	69	182	87	104	115	62	111	63	103	11.2537	5.18225	7.12674	3.976	9.43182	4.83736	5.74245	5.24436	3.20544	5.7232	3.24096	5.876	2.17159	1.79244	1.94979	1.09498	0.560078	0.551559	1.42225	0.00744882	1	+	+	+	-	-	-	Distal Intergenic	11127257	11130777	3521	+	408383	NM_001205062.1
NC_037649.1	11116060	11116667	11116201;11116528;11116455;11116524	148	104	168	84	199	114	102	115	99	117	77	96	9.47342	5.72775	7.87202	4.828	10.308	6.32155	5.63307	5.24436	5.088	6.0298	3.94992	5.4805	1.65395	1.63049	1.63061	1.07412	0.843809	0.720723	0.897407	0.0176708	1	+	+	+	-	-	-	Distal Intergenic	11127257	11130777	3521	+	408383	NM_001205062.1
NC_037649.1	11117346	11117731	11117520;11117543;11117543	142	79	153	63	148	74	98	67	93	77	75	46	9.09194	4.364	7.17332	3.6352	7.67946	4.12275	5.41431	3.07428	4.78272	3.9858	3.84864	2.6555	2.0834	1.97329	1.8627	1.76116	1.19994	1.44931	0.424536	0.0750603	1	+	+	+	-	-	-	Distal Intergenic	11127257	11130777	3521	+	408383	NM_001205062.1
NC_037649.1	11132296	11132998	11132563;11132606;11132671	152	122	259	115	374	102	124	127	88	145	93	109	9.72774	6.70965	12.1108	6.5888	19.3275	5.66191	6.83625	5.78688	4.52832	7.4606	4.76016	6.215	1.44981	1.83809	3.4136	1.18134	0.606965	0.765915	1.3916	0.139351	1	+	+	+	-	-	-	3' UTR	11127388	11130728	3341	+	408383	XM_006566842.3
NC_037646.1	7322886	7323442	7323145;7323227;7323197	123	85	243	66	224	75	95	107	91	99	91	64	7.88392	4.6913	11.3655	3.8056	11.5965	4.17772	5.25024	4.88268	4.68096	5.11	4.65888	3.6725	1.68054	2.98652	2.7758	1.07528	0.916039	1.26859	1.19103	0.067117	1	+	+	+	-	-	-	Intron (XM_006561565.3/724137, intron 3 of 12)	7351184	7352989	1806	-	408391	XM_003249858.4
NC_037650.1	5366772	5368376	5367031;5367439;5368314;5367044;5366994;5367268;5368167	383	210	399	182	517	177	254	255	196	236	155	187	24.4147	11.51	18.632	10.3944	26.6977	9.78466	13.9459	11.5738	10.0234	12.1107	7.89984	10.622	2.12117	1.7925	2.72853	1.20495	0.827648	0.743724	1.25848	0.0250476	1	+	+	+	-	-	-	Intron (XM_026444553.1/408423, intron 2 of 15)	5292251	5355108	62858	-	408423	XM_026444555.1
NC_037650.1	5400671	5401151	5400889;5400834;5401007	112	81	147	67	194	84	111	97	81	97	64	94	7.18454	4.4731	6.89384	3.8624	10.0503	4.67245	6.12528	4.43058	4.17216	5.0078	3.2916	5.3675	1.60617	1.78486	2.15097	1.3825	0.833132	0.613246	0.970175	0.037208	1	+	+	+	-	-	-	Promoter (2-3kb)	5292251	5398386	106136	-	408423	XM_026444536.1
NC_037650.1	5399912	5400399	5400115;5400173;5400117;5400200	114	99	154	68	172	67	79	101	77	92	56	80	7.3117	5.455	7.2199	3.9192	8.91642	3.73796	4.3752	4.61142	3.96864	4.7523	2.88648	4.5765	1.34037	1.84219	2.38537	0.948775	0.835099	0.630718	1.20536	0.0626489	1	+	+	+	-	-	-	Promoter (1-2kb)	5292251	5398386	106136	-	408423	XM_026444536.1
NC_037650.1	5659375	5660247	5659748;5659867;5659563;5660038	309	160	279	119	264	87	143	149	132	145	100	109	19.7098	8.78255	13.0424	6.816	13.6581	4.83736	7.87536	6.7815	6.76704	7.4606	5.11464	6.215	2.2442	1.9135	2.82346	1.1613	0.907037	0.822951	1.27175	0.0243693	1	+	+	+	-	-	-	Distal Intergenic	5654080	5656491	2412	+	408424	XM_391971.7
NC_037650.1	6928901	6930045	6929115;6929350;6929623;6929121;6929731;6929062	331	166	272	127	321	163	229	197	166	196	127	173	21.1086	9.10985	12.7163	7.2704	16.5959	9.01508	12.5787	8.95158	8.49696	10.0667	6.48192	9.831	2.31712	1.74905	1.8409	1.40519	0.844066	0.659335	1.02212	0.0270815	1	+	+	+	-	-	-	Distal Intergenic	6858151	6861688	3538	-	408434	XM_006560307.2
NC_037651.1	8941118	8941984	8941667;8941353;8941654	255	132	232	106	325	114	189	156	134	145	111	97	16.2765	7.25515	10.8531	6.0776	16.802	6.32155	10.3911	7.09797	6.8688	7.4606	5.67168	5.537	2.24344	1.78575	2.65789	1.46395	0.920677	1.02432	0.972049	0.0285053	1	+	+	+	-	-	-	3' UTR	8943525	8960942	17418	-	408471	XM_006564863.3
NC_037652.1	7049764	7050258	7050083;7050046;7050172	122	94	134	68	172	75	97	92	67	64	62	84	7.82034	5.18225	6.2883	3.9192	8.91642	4.17772	5.35962	4.20453	3.45984	3.3215	3.19032	4.8025	1.50906	1.60449	2.13428	1.27473	1.04165	0.664304	0.816079	0.0460014	1	+	+	+	-	-	-	Distal Intergenic	7000631	7038341	37711	-	408521	NM_001011629.1
NC_037638.1	22447827	22448802	22447997;22448354;22448721;22447971;22448470;22448123	246	130	212	116	269	97	190	166	127	143	106	116	15.7043	7.14605	9.92154	6.6456	13.9158	5.38706	10.4458	7.55007	6.51264	7.3584	5.41848	6.6105	2.19762	1.49295	2.58319	1.38354	0.885062	0.819678	1.02253	0.0590048	1	+	+	+	-	-	-	Distal Intergenic	22554375	22584814	30440	+	408569	XM_392112.7
NC_037638.1	22546340	22546824	22546508;22546445;22546614	134	78	159	82	133	61	131	100	120	65	64	72	8.5833	4.30945	7.4528	4.7144	6.90636	3.40814	7.21908	4.56621	6.15648	3.3726	3.2916	4.1245	1.99174	1.58086	2.02643	1.58098	1.82544	0.79806	0.413249	0.271913	1	+	+	+	-	-	-	Distal Intergenic	22554375	22584814	30440	+	408569	XM_392112.7
NC_037638.1	16038114	16038883	16038537;16038374;16038737;16038419	210	83	200	96	352	109	130	106	105	117	97	102	13.4154	4.5822	9.36258	5.5096	18.1936	6.0467	7.16439	4.83747	5.39328	6.0298	4.96272	5.8195	2.92772	1.69932	3.00885	1.48102	0.894438	0.852774	1.24205	0.0553181	1	+	+	+	-	-	-	3' UTR	16030212	16039045	8834	+	408586	XM_026445302.1
NC_037638.1	10251520	10252100	10251828;10251745;10251968	171	114	140	57	188	79	168	104	91	99	60	101	10.9358	6.27325	6.56778	3.2944	9.74106	4.3976	9.24261	4.74705	4.68096	5.11	3.08904	5.763	1.74324	1.99362	2.21509	1.94702	0.916039	0.536012	0.80822	0.172437	1	+	+	+	-	-	-	Intron (XM_026446284.1/725189, intron 3 of 7)	10227101	10231510	4410	+	408600	XM_016914622.2
NC_037638.1	8424076	8424512	8424262;8424291;8424360	143	70	128	61	127	73	101	88	60	91	36	72	9.15552	3.87305	6.00882	3.5216	6.59712	4.06778	5.57838	4.02369	3.10368	4.7012	1.87368	4.1245	2.3639	1.70628	1.6218	1.38638	0.660189	0.454281	1.18651	0.0461328	1	+	+	+	-	-	-	Promoter (1-2kb)	8422677	8533011	110335	+	408602	XM_006567940.3
NC_037638.1	8494252	8495069	8494384;8494843;8494870;8494909	175	103	205	99	272	86	116	104	99	106	83	118	11.1901	5.6732	9.59548	5.68	14.0704	4.78239	6.39873	4.74705	5.088	5.4677	4.25376	6.7235	1.97245	1.68935	2.94213	1.34794	0.930556	0.63267	1.18173	0.0628373	1	+	+	+	-	-	-	Promoter (1-2kb)	8492775	8533011	40237	+	408602	XM_006567938.3
NC_037638.1	8502672	8503281	8502849;8502794;8503019	197	108	153	74	188	70	136	101	60	93	46	73	12.5888	5.94595	7.17332	4.26	9.74106	3.90287	7.49253	4.61142	3.10368	4.8034	2.38008	4.181	2.11721	1.68388	2.49587	1.62478	0.646142	0.569261	1.14867	0.0563489	1	+	+	+	-	-	-	Promoter (2-3kb)	8499748	8533011	33264	+	408602	XM_006567939.3
NC_037638.1	8438137	8438601	8438398;8438392;8438281	153	89	126	72	176	94	110	74	89	60	50	77	9.79132	4.9095	5.91566	4.1464	9.12258	5.22215	6.07059	3.39075	4.5792	3.1171	2.58264	4.407	1.99436	1.4267	1.7469	1.79034	1.46906	0.586031	0.426451	0.351759	1	+	+	+	-	-	-	Intron (XM_026444045.1/408602, intron 2 of 14)	8422677	8533011	110335	+	408602	XM_006567940.3
NC_037638.1	8448491	8449143	8448682;8448955;8448741;8448940	150	86	164	76	199	62	131	126	72	92	32	104	9.60058	4.74585	7.6857	4.3736	10.308	3.46311	7.21908	5.74167	3.71424	4.7523	1.67112	5.9325	2.02294	1.75729	2.97652	1.25731	0.781567	0.281689	1.54185	0.0369553	1	+	+	+	-	-	-	Intron (XM_026444045.1/408602, intron 2 of 14)	8422677	8533011	110335	+	408602	XM_006567940.3
NC_037638.1	4999226	4999642	4999436;4999432;4999456	126	71	142	61	124	63	78	76	104	84	87	62	8.07466	3.9276	6.66094	3.5216	6.4425	3.51808	4.32051	3.48117	5.3424	4.3435	4.45632	3.5595	2.05588	1.89145	1.83125	1.24111	1.22998	1.25195	0.634237	0.00899147	1	+	+	+	-	-	-	Intron (XM_006562525.3/408616, intron 1 of 9)	4829148	5009061	179914	-	408616	XM_006562525.3
NC_037638.1	4370489	4370975	4370816;4370752;4370825	109	69	132	72	124	60	97	81	105	66	109	45	6.9938	3.8185	6.19514	4.1464	6.4425	3.35317	5.35962	3.70722	5.39328	3.4237	5.5704	2.599	1.83156	1.4941	1.92132	1.44572	1.57528	2.14329	0.0229159	0.918781	1	+	+	+	-	-	-	Intron (XM_026442676.1/408618, intron 1 of 15)	3993015	4375035	382021	-	408618	XM_026442676.1
NC_037638.1	25384061	25384743	25384498;25384506;25384441	208	112	196	90	258	108	122	132	115	128	96	76	13.2882	6.16415	9.17626	5.1688	13.3489	5.99173	6.72687	6.01293	5.90208	6.5919	4.91208	4.3505	2.15572	1.77532	2.22789	1.11873	0.895353	1.12908	0.970458	0.00745278	1	+	+	+	-	-	-	3' UTR	25395063	25457846	62784	+	408631	XM_026442273.1
NC_037638.1	24427485	24428274	24427648;24427564;24427846;24428104	186	109	219	83	143	94	164	123	146	105	84	128	11.8895	6.0005	10.2476	4.7712	7.42176	5.22215	9.02385	5.60604	7.47936	5.4166	4.3044	7.2885	1.98142	2.1478	1.42121	1.60967	1.38082	0.590574	0.632212	0.165879	1	+	+	+	-	-	-	Intron (XM_026445667.1/551071, intron 3 of 31)	24393087	24394104	1018	-	408642	XM_026446319.1
NC_037638.1	23604902	23605504	23605078;23605061;23605255	181	81	169	91	189	90	126	112	99	90	64	113	11.5716	4.4731	7.9186	5.2256	9.7926	5.00227	6.94563	5.10873	5.088	4.6501	3.2916	6.441	2.58693	1.51535	1.95763	1.35956	1.09417	0.511039	1.03138	0.0638222	1	+	+	+	-	-	-	Intron (XM_026446070.1/408645, intron 4 of 18)	23465230	23662753	197524	-	408645	XM_026446070.1
NC_037638.1	23363909	23364401	23364342;23364196;23364198	146	87	128	62	193	50	99	100	89	106	75	93	9.34626	4.8004	6.00882	3.5784	9.99876	2.80347	5.469	4.56621	4.5792	5.4677	3.84864	5.311	1.94698	1.67919	3.56657	1.19771	0.8375	0.724654	1.38194	0.122056	1	+	+	+	-	-	-	Promoter (<=1kb)	23319490	23364006	44517	-	408646	XM_016910887.2
NC_037639.1	10259110	10259614	10259330;10259391;10259427	145	63	160	65	156	62	90	84	61	64	61	75	9.28268	3.4912	7.49938	3.7488	8.09178	3.46311	4.97679	3.84285	3.15456	3.3215	3.13968	4.294	2.65888	2.00047	2.33656	1.29508	0.94974	0.731178	1.23314	0.00630452	1	+	+	+	-	-	-	Intron (XM_392230.7/408694, intron 1 of 3)	10255351	10290009	34659	+	408694	XM_392230.7
NC_037639.1	8647869	8648343	8648086;8648077;8648119	132	87	146	72	177	81	103	92	65	74	63	67	8.45614	4.8004	6.84726	4.1464	9.17412	4.50754	5.68776	4.20453	3.35808	3.8325	3.24096	3.842	1.76155	1.65137	2.03528	1.35277	0.876211	0.843561	0.826349	0.020936	1	+	+	+	-	-	-	Distal Intergenic	8658617	8660460	1844	+	408702	XM_392238.7
NC_037639.1	8653836	8654530	8654167;8654142;8654332	170	111	161	72	229	97	153	114	100	104	103	87	10.8722	6.1096	7.54596	4.1464	11.8542	5.38706	8.42226	5.19915	5.13888	5.3655	5.26656	4.972	1.77953	1.81988	2.2005	1.61993	0.957763	1.05924	0.673305	0.0513916	1	+	+	+	-	-	-	Distal Intergenic	8658617	8660460	1844	+	408702	XM_392238.7
NC_037639.1	5949674	5950020	5949837;5949840;5949886	135	62	138	65	151	54	87	61	73	49	78	39	8.64688	3.43665	6.47462	3.7488	7.83408	3.02335	4.81272	2.80302	3.76512	2.555	4.00056	2.26	2.51608	1.72712	2.59119	1.71698	1.47363	1.77016	0.46225	0.142024	1	+	+	+	-	-	-	Intron (XM_026439200.1/410893, intron 10 of 12)	5860584	5964574	103991	-	408710	XR_003304211.1
NC_037639.1	4700138	4700802	4700533;4700469;4700491	198	122	256	70	194	83	89	105	58	92	51	62	12.6524	6.70965	11.9711	4.0328	10.0503	4.61748	4.9221	4.79226	3.00192	4.7523	2.63328	3.5595	1.8857	2.96843	2.17658	1.02709	0.631677	0.739789	1.5515	0.0295976	1	+	+	+	-	-	-	5' UTR	4692842	4715031	22190	+	408718	XM_026438971.1
NC_037640.1	8405726	8406198	8405957;8405960;8406004	151	85	155	46	214	74	69	83	76	70	67	69	9.66416	4.6913	7.26648	2.6696	11.0811	4.12275	3.8283	3.79764	3.91776	3.6281	3.44352	3.955	2.06002	2.72194	2.68779	1.00807	1.07984	0.870675	1.33615	0.0143533	1	+	+	+	-	-	-	Intron (XM_016911227.2/408741, intron 2 of 7)	8401591	8634817	233227	+	408741	XM_016911228.2
NC_037640.1	3477190	3477995	3477386;3477537;3477844;3477580;3477708	218	146	204	102	198	89	148	143	100	109	77	96	13.924	8.01885	9.5489	5.8504	10.2565	4.9473	8.14881	6.51024	5.13888	5.621	3.94992	5.4805	1.73641	1.63218	2.07315	1.25169	0.914229	0.720723	0.914675	0.0147518	1	+	+	+	-	-	-	Promoter (<=1kb)	3327213	3476366	149154	-	408758	XM_006558373.3
NC_037640.1	3095089	3095516	3095278;3095330;3095306	107	70	200	52	105	67	88	64	135	60	104	55	6.86664	3.87305	9.36258	3.0104	5.46324	3.73796	4.86741	2.93865	6.91968	3.1171	5.3172	3.164	1.77293	3.11008	1.46156	1.65634	2.21991	1.68053	0.191271	0.664778	1	+	+	+	-	-	-	Intron (XM_016911332.2/408759, intron 2 of 9)	3081076	3115462	34387	+	408759	XM_016911334.2
NC_037641.1	9873227	9873928	9873442;9873481;9873477	169	88	288	86	180	98	73	122	94	82	60	78	10.8086	4.85495	13.4616	4.9416	9.32874	5.44203	4.04706	5.56083	4.8336	4.2413	3.08904	4.4635	2.22631	2.72414	1.7142	0.72778	1.13965	0.692067	1.38067	0.0258693	1	+	+	+	-	-	-	Intron (XM_016911649.2/408801, intron 1 of 9)	9613735	9840315	226581	-	408801	XM_026440434.1
NC_037641.1	9872098	9873034	9872327;9872697;9872435;9872803;9872334;9872760	298	149	375	140	496	125	139	146	119	134	116	111	19.0104	8.1825	17.5141	8.0088	25.6154	6.92622	7.6566	6.64587	6.1056	6.8985	5.92488	6.328	2.3233	2.18686	3.69832	1.15208	0.885062	0.936296	1.46498	0.0649079	1	+	+	+	-	-	-	Intron (XM_016911649.2/408801, intron 1 of 9)	9613735	9840315	226581	-	408801	XM_026440434.1
NC_037641.1	9675779	9676304	9675955;9676217;9676062;9676029	138	96	177	68	135	61	122	90	70	87	69	60	8.83762	5.29135	8.29124	3.9192	7.00944	3.40814	6.72687	4.11411	3.61248	4.4968	3.5448	3.4465	1.6702	2.11554	2.05668	1.63507	0.803345	1.02852	0.752904	0.0653397	1	+	+	+	-	-	-	Intron (XM_026440434.1/408801, intron 3 of 9)	9613735	9644874	31140	-	408801	XM_006565424.3
NC_037641.1	9865756	9866690	9865908;9866261;9866272;9866044	259	134	216	111	375	115	173	125	85	169	95	112	16.5308	7.36425	10.1079	6.3616	19.379	6.37652	9.51606	5.69646	4.37568	8.687	4.86144	6.3845	2.24474	1.58889	3.03912	1.67052	0.503704	0.761444	1.2272	0.0768289	1	+	+	+	-	-	-	Intron (XM_016911649.2/408801, intron 1 of 9)	9613735	9840315	226581	-	408801	XM_026440434.1
NC_037641.1	9859691	9860109	9859887;9859844;9859967	110	71	137	64	149	62	98	75	71	55	49	61	7.05738	3.9276	6.42804	3.692	7.731	3.46311	5.41431	3.43596	3.66336	2.8616	2.532	3.503	1.79687	1.74107	2.23239	1.57578	1.28018	0.722809	0.689191	0.0804626	1	+	+	+	-	-	-	Intron (XM_016911649.2/408801, intron 1 of 9)	9613735	9840315	226581	-	408801	XM_026440434.1
NC_037641.1	9858676	9859045	9858870;9858852;9858908	104	73	127	30	129	53	73	54	46	55	51	67	6.6759	4.0367	5.96224	1.7608	6.7002	2.96838	4.04706	2.48655	2.39136	2.8616	2.63328	3.842	1.6538	3.3861	2.25719	1.62758	0.835672	0.685393	1.21259	0.0940539	1	+	+	+	-	-	-	Intron (XM_016911649.2/408801, intron 1 of 9)	9613735	9840315	226581	-	408801	XM_026440434.1
NC_037641.1	9899433	9899780	9899620;9899610;9899602	99	69	113	40	121	71	93	81	78	60	50	58	6.358	3.8185	5.31012	2.3288	6.28788	3.95784	5.14086	3.70722	4.01952	3.1171	2.58264	3.3335	1.66505	2.2802	1.58872	1.38672	1.28951	0.774753	0.681309	0.0759444	1	+	+	+	-	-	-	Intron (XM_016911649.2/408801, intron 1 of 9)	9613735	9923720	309986	-	408801	XM_016911649.2
NC_037641.1	9123345	9123807	9123604;9123594;9123601	137	79	219	72	163	54	87	88	47	70	39	64	8.77404	4.364	10.2476	4.1464	8.45256	3.02335	4.81272	4.02369	2.44224	3.6281	2.0256	3.6725	2.01055	2.47145	2.79576	1.1961	0.673146	0.551559	1.58801	0.00615031	1	+	+	+	-	-	-	Intron (XM_026440251.1/408803, intron 2 of 8)	9061799	9090898	29100	-	408803	XM_006565136.3
NC_037641.1	6819768	6820145	6819943;6819942;6819981	86	50	118	49	123	59	112	91	73	54	59	66	5.53146	2.78205	5.54302	2.84	6.39096	3.2982	6.17997	4.15932	3.76512	2.8105	3.0384	3.7855	1.98827	1.95177	1.93771	1.48581	1.33966	0.802642	0.696043	0.06814	1	+	+	+	-	-	-	Intron (XM_016911575.2/408810, intron 1 of 21)	6808303	6977717	169415	+	408810	XM_016911576.2
NC_037641.1	6892126	6892645	6892323;6892315;6892305	153	60	125	62	126	71	116	102	108	76	88	77	9.79132	3.32755	5.86908	3.5784	6.54558	3.95784	6.39873	4.65663	5.54592	3.9347	4.50696	4.407	2.9425	1.64014	1.65383	1.37411	1.40949	1.02268	0.712346	0.195127	1	+	+	+	-	-	-	Intron (XM_016911575.2/408810, intron 4 of 21)	6880035	6977717	97683	+	408810	XM_006562702.3
NC_037641.1	6857228	6857613	6857388;6857358;6857425	141	79	124	65	113	57	109	99	79	67	54	62	9.02836	4.364	5.8225	3.7488	5.87556	3.18826	6.0159	4.521	4.0704	3.4748	2.7852	3.5595	2.06883	1.55316	1.84287	1.33066	1.17141	0.782469	0.734498	0.0305348	1	+	+	+	-	-	-	Intron (XM_016911575.2/408810, intron 4 of 21)	6840769	6977717	136949	+	408810	XM_016911579.2
NC_037642.1	1289509	1289915	1289696;1289700;1289775	133	79	130	65	94	56	81	90	43	76	63	70	8.51972	4.364	6.10198	3.7488	4.8963	3.13329	4.48458	4.11411	2.23872	3.9347	3.24096	4.0115	1.95227	1.62772	1.56267	1.09005	0.568968	0.807917	1.0598	0.0110068	1	+	+	+	-	-	-	Intron (XM_026440819.1/408822, intron 2 of 18)	1279705	1750482	470778	+	408822	XM_026440822.1
NC_037642.1	9831724	9832119	9831903;9831930;9831986	98	46	128	68	118	71	91	83	82	70	61	52	6.29442	2.56385	6.00882	3.9192	6.13326	3.95784	5.03148	3.79764	4.22304	3.6281	3.13968	2.9945	2.45507	1.53318	1.54965	1.3249	1.16398	1.04848	0.646663	0.152807	1	+	+	+	-	-	-	Promoter (2-3kb)	9809292	9829489	20198	-	408839	XM_026440779.1
NC_037643.1	15222494	15222878	15222679;15222682;15222670	104	62	87	49	123	48	75	61	55	87	50	58	6.6759	3.43665	4.09904	2.84	6.39096	2.69353	4.15644	2.80302	2.84928	4.4968	2.58264	3.3335	1.94256	1.44332	2.37271	1.48284	0.633624	0.774753	0.994037	0.0637302	1	+	+	+	-	-	-	Distal Intergenic	15129832	15202295	72464	-	408872	XM_026441131.1
NC_037643.1	14282420	14282824	14282601;14282662;14282645	130	62	125	43	109	60	92	91	60	79	86	59	8.32898	3.43665	5.86908	2.4992	5.6694	3.35317	5.08617	4.15932	3.10368	4.088	4.40568	3.39	2.42358	2.34838	1.69076	1.22284	0.759217	1.29961	0.977713	0.0247353	1	+	+	+	-	-	-	Intron (XM_006570518.3/408874, intron 2 of 30)	14274839	14496462	221624	+	408874	XM_006570520.3
NC_037643.1	12020598	12020991	12020780;12020726;12020791	106	78	119	50	129	60	104	86	57	74	46	67	6.80306	4.30945	5.5896	2.8968	6.7002	3.35317	5.74245	3.93327	2.95104	3.8325	2.38008	3.842	1.57864	1.92958	1.99817	1.45997	0.770004	0.61949	0.950416	0.0563084	1	+	+	+	-	-	-	Intron (XM_016912569.2/408877, intron 1 of 6)	11986147	12101047	114901	+	408877	XM_016912571.2
NC_037643.1	9564032	9564442	9564347;9564207;9564289	97	57	129	53	113	53	76	67	69	83	36	66	6.23084	3.1639	6.0554	3.0672	5.87556	2.96838	4.21113	3.07428	3.5616	4.2924	1.87368	3.7855	1.96935	1.97424	1.97938	1.36979	0.829746	0.494962	1.1363	0.0517475	1	+	+	+	-	-	-	Intron (XM_016912656.2/408884, intron 1 of 8)	9582023	9667691	85669	+	408884	XM_392414.7
NC_037643.1	9602457	9602955	9602739;9602745;9602785	136	92	145	51	181	61	103	95	108	86	116	76	8.71046	5.07315	6.80068	2.9536	9.38028	3.40814	5.68776	4.34016	5.54592	4.4457	5.92488	4.3505	1.71697	2.30251	2.75232	1.3105	1.24748	1.36188	0.788736	0.0849411	1	+	+	+	-	-	-	Intron (XM_016912656.2/408884, intron 1 of 8)	9582026	9665415	83390	+	408884	XM_026441575.1
NC_037643.1	9622896	9623276	9623070;9623068;9623084	117	61	141	55	145	70	96	78	65	60	51	58	7.50244	3.3821	6.61436	3.1808	7.52484	3.90287	5.30493	3.57159	3.35808	3.1171	2.63328	3.3335	2.21828	2.07946	1.92803	1.48531	1.07731	0.789945	0.892986	0.0278466	1	+	+	+	-	-	-	Intron (XM_016912656.2/408884, intron 2 of 8)	9582026	9665415	83390	+	408884	XM_026441575.1
NC_037643.1	8226839	8227389	8226993;8226997;8227016;8227199	142	84	159	89	165	80	142	111	132	111	74	95	9.09194	4.63675	7.4528	5.112	8.55564	4.45257	7.82067	5.06352	6.76704	5.7232	3.798	5.424	1.96084	1.4579	1.92151	1.54451	1.18239	0.700221	0.639911	0.105662	1	+	+	+	-	-	-	Intron (XM_006565410.3/408890, intron 1 of 12)	8136013	8221113	85101	-	408890	XM_006565411.3
NC_037643.1	7257199	7257855	7257508;7257538;7257483	360	80	431	85	297	79	104	97	71	93	41	90	22.9524	4.41855	20.1226	4.8848	15.3589	4.3976	5.74245	4.43058	3.66336	4.8034	2.12688	5.1415	5.19455	4.11943	3.49256	1.29609	0.76266	0.413669	2.37288	0.00865147	1	+	+	+	-	-	-	Intron (XM_006564127.3/408894, intron 9 of 15)	7229529	7292653	63125	+	408894	XM_026441324.1
NC_037643.1	5977102	5977540	5977187;5977456;5977273;5977246;5977330	125	99	123	51	107	55	87	77	80	75	34	77	8.01108	5.455	5.77592	2.9536	5.56632	3.07832	4.81272	3.52638	4.12128	3.8836	1.7724	4.407	1.46858	1.95555	1.80823	1.36478	1.0612	0.402178	0.887601	0.087497	1	+	+	+	-	-	-	Intron (XM_392426.6/408896, intron 1 of 10)	5865937	6083723	217787	-	408896	XM_392426.6
NC_037644.1	11069760	11070549	11070270;11070114;11070424	208	125	174	85	301	106	165	173	93	136	64	117	13.2882	6.8733	8.1515	4.8848	15.5651	5.88179	9.07854	7.86654	4.78272	7.0007	3.2916	6.667	1.93331	1.66875	2.64632	1.15407	0.683177	0.493715	1.42256	0.0260575	1	+	+	+	-	-	-	3' UTR	11057489	11064874	7386	+	408923	XM_016913104.2
NC_037644.1	9538047	9540226	9538270;9538707;9539133;9538620;9539160;9539784	234	244	624	251	445	220	173	275	187	260	145	269	14.9413	13.3648	29.1125	14.3136	22.9868	12.1484	9.51606	12.478	9.56544	13.3371	7.39344	15.255	1.11796	2.0339	1.89217	0.762627	0.717205	0.484657	1.36042	0.0586514	1	+	+	+	-	-	-	3' UTR	9550759	9553976	3218	+	408928	NM_001160064.1
NC_037644.1	9089302	9089672	9089474;9089472;9089611	88	58	130	66	106	61	78	81	64	63	34	54	5.65862	3.21845	6.10198	3.8056	5.51478	3.40814	4.32051	3.70722	3.3072	3.2704	1.7724	3.1075	1.75818	1.60342	1.61812	1.16543	1.01125	0.570362	0.858185	0.0444734	1	+	+	+	-	-	-	Distal Intergenic	9098081	9111467	13387	+	408930	XM_006565075.3
NC_037644.1	9089829	9090190	9090042;9090008;9090049	102	64	127	57	112	56	79	99	57	69	58	72	6.54874	3.54575	5.96224	3.2944	5.82402	3.13329	4.3752	4.521	2.95104	3.577	2.98776	4.1245	1.84693	1.80981	1.85876	0.96775	0.825004	0.724393	1.1317	0.00367517	1	+	+	+	-	-	-	Distal Intergenic	9098081	9111467	13387	+	408930	XM_006565075.3
NC_037646.1	12015178	12015581	12015352;12015373;12015403	139	68	114	49	152	36	96	67	82	80	60	50	8.9012	3.76395	5.3567	2.84	7.88562	2.03389	5.30493	3.07428	4.22304	4.1391	3.08904	2.8815	2.36486	1.88616	3.87711	1.72558	1.02028	1.07202	1.09015	0.126141	1	+	+	+	-	-	-	Promoter (2-3kb)	12004649	12017589	12941	-	408976	XM_016913901.2
NC_037646.1	9596677	9597118	9596872;9596910;9596894	127	92	162	56	162	65	100	73	112	99	86	75	8.13824	5.07315	7.59254	3.2376	8.40102	3.62802	5.52369	3.34554	5.74944	5.11	4.40568	4.294	1.60418	2.34511	2.31559	1.65106	1.12514	1.02601	0.720452	0.0600755	1	+	+	+	-	-	-	Intron (XM_006561851.3/409001, intron 1 of 11)	9592984	9628800	35817	+	409001	XM_006561852.3
NC_037644.1	8374963	8375366	8375125;8375174;8375102	100	56	86	43	115	59	86	90	49	71	73	61	6.42158	3.10935	4.05246	2.4992	5.97864	3.2982	4.75803	4.11411	2.544	3.6792	3.74736	3.503	2.06525	1.6215	1.8127	1.15652	0.691455	1.06976	0.914442	0.0112675	1	+	+	+	-	-	-	Intron (XM_006562570.3/409212, intron 1 of 28)	8139228	8394435	255208	-	409212	XM_006562570.3
NC_037652.1	8038785	8039215	8039023;8038994;8039039	106	41	168	51	145	36	73	84	66	61	45	58	6.80306	2.2911	7.87202	2.9536	7.52484	2.03389	4.04706	3.84285	3.40896	3.1682	2.32944	3.3335	2.96934	2.66523	3.69973	1.05314	1.07599	0.698797	1.7228	0.010813	1	+	+	+	-	-	-	Intron (XM_006563614.3/409611, intron 1 of 14)	7909918	8044316	134399	-	409611	XM_006563614.3
NC_037645.1	4202312	4203975	4202625;4203120;4203703;4202640;4202657;4203102;4203143	200	140	698	132	334	151	152	196	203	154	191	143	12.7796	7.69155	32.5594	7.5544	17.2659	8.35544	8.36757	8.90637	10.3795	7.9205	9.72288	8.136	1.66151	4.30999	2.06643	0.939504	1.31046	1.19504	1.22232	0.202393	1	+	+	+	-	-	-	Promoter (<=1kb)	4202401	4206565	4165	+	409633	XM_006561423.3
NC_037648.1	8823419	8823773	8823572;8823589;8823619	90	48	135	60	128	63	72	67	85	56	77	51	5.78578	2.67295	6.33488	3.4648	6.64866	3.51808	3.99237	3.07428	4.37568	2.9127	3.94992	2.938	2.16457	1.82835	1.88985	1.29864	1.50228	1.34442	0.505008	0.0140492	1	+	+	+	-	-	-	Intron (XM_001120157.5/724336, intron 4 of 8)	8782411	8798001	15591	+	409695	XM_026443755.1
NC_037638.1	3770067	3770556	3770268;3770246;3770342	96	70	107	43	99	67	103	79	76	58	57	70	6.16726	3.87305	5.03064	2.4992	5.154	3.73796	5.68776	3.6168	3.91776	3.0149	2.93712	4.0115	1.59235	2.0129	1.37883	1.57259	1.29947	0.732175	0.467634	0.217042	1	+	+	+	-	-	-	Distal Intergenic	3291485	3749589	458105	-	409780	XM_026439138.1
NC_037638.1	3681146	3681963	3681410;3681896;3681364;3681379	177	108	286	81	219	119	120	90	133	119	148	121	11.3172	5.94595	13.3685	4.6576	11.3388	6.5964	6.61749	4.11411	6.81792	6.132	7.54536	6.893	1.90335	2.87026	1.71894	1.60849	1.11186	1.09464	0.767105	0.113547	1	+	+	+	-	-	-	Promoter (<=1kb)	3291485	3682271	390787	-	409780	XM_026439148.1
NC_037638.1	3638776	3639157	3638969;3639011;3638951	132	66	132	61	158	60	76	76	66	86	58	52	8.45614	3.65485	6.19514	3.5216	8.19486	3.35317	4.21113	3.48117	3.40896	4.4457	2.98776	2.9945	2.31368	1.75918	2.44391	1.20969	0.766799	0.997749	1.13164	0.0137126	1	+	+	+	-	-	-	Intron (XM_026439141.1/409780, intron 3 of 16)	3291485	3679215	387731	-	409780	XM_026439141.1
NC_037638.1	3636957	3637460	3637212;3637268;3637246	121	53	168	63	157	64	74	88	81	67	96	67	7.75676	2.9457	7.87202	3.6352	8.14332	3.57305	4.10175	4.02369	4.17216	3.4748	4.91208	3.842	2.63325	2.1655	2.27909	1.0194	1.20069	1.27852	1.01653	0.00453374	1	+	+	+	-	-	-	Intron (XM_026439141.1/409780, intron 3 of 16)	3291485	3679215	387731	-	409780	XM_026439141.1
NC_037640.1	9813270	9814266	9813409;9813736;9814198;9814015;9814117	272	155	254	129	263	121	198	201	109	141	85	155	17.3573	8.5098	11.8779	7.384	13.6066	6.70634	10.8833	9.13242	5.5968	7.2562	4.35504	8.814	2.03968	1.6086	2.02892	1.19172	0.771313	0.494105	1.2082	0.0156273	1	+	+	+	-	-	-	Intron (XM_006566773.3/409795, intron 17 of 27)	9698620	9836284	137665	-	409795	XM_006566773.3
NC_037640.1	9714033	9714643	9714318;9714231;9714533	164	76	149	72	193	91	132	124	118	105	76	67	10.4907	4.20035	6.987	4.1464	9.99876	5.05724	7.27377	5.65125	6.05472	5.4166	3.89928	3.842	2.49758	1.68508	1.97712	1.28711	1.11781	1.01491	0.848954	0.0497639	1	+	+	+	-	-	-	Intron (XM_006566773.3/409795, intron 24 of 27)	9698620	9836284	137665	-	409795	XM_006566773.3
NC_037647.1	3389360	3389808	3389608;3389599;3389619	116	43	149	36	127	54	67	72	54	39	36	33	7.43886	2.4002	6.987	2.1016	6.59712	3.02335	3.71892	3.30033	2.7984	2.044	1.87368	1.921	3.09927	3.32461	2.18206	1.12683	1.36908	0.975367	1.30986	0.0294514	1	+	+	+	-	-	-	Intron (XM_016914332.2/409849, intron 1 of 9)	3306197	3340289	34093	-	409849	XM_006560119.3
NC_037643.1	6547901	6548552	6548031;6548328;6548005;6548357;6548365	162	82	184	75	168	81	122	100	109	105	85	81	10.3635	4.52765	8.6173	4.3168	8.71026	4.50754	6.72687	4.56621	5.5968	5.4166	4.35504	4.633	2.28894	1.99622	1.93238	1.47318	1.03327	0.940004	0.851229	0.0131437	1	+	+	+	-	-	-	Exon (XM_026441439.1/409898, exon 7 of 16)	6522504	6532893	10390	-	409899	XM_016912675.2
NC_037638.1	9295858	9296376	9296069;9296111;9296098	130	72	191	63	130	77	66	95	65	84	71	53	8.32898	3.98215	8.94336	3.6352	6.75174	4.28766	3.66423	4.34016	3.35808	4.3435	3.64608	3.051	2.09158	2.46021	1.57469	0.844262	0.773128	1.19504	1.12324	0.0318632	1	+	+	+	-	-	-	Promoter (<=1kb)	9274925	9296077	21153	-	409924	XM_016912131.2
NC_037644.1	9578880	9579450	9579091;9579131;9579122	149	71	252	78	191	76	102	126	85	59	70	48	9.537	3.9276	11.7847	4.4872	9.89568	4.23269	5.63307	5.74167	4.37568	3.066	3.59544	2.7685	2.4282	2.62629	2.33792	0.981086	1.42716	1.2987	0.995815	0.00274102	1	+	+	+	-	-	-	Promoter (1-2kb)	9577046	9604553	27508	+	409933	XM_026441926.1
NC_037640.1	6983592	6984355	6983730;6984119;6983758;6984006;6984093	186	112	170	104	224	142	161	152	137	125	67	106	11.8895	6.16415	7.96518	5.964	11.5965	7.86071	8.85978	6.91713	7.02144	6.4386	3.44352	6.0455	1.92881	1.33554	1.47525	1.28085	1.09052	0.569601	0.688475	0.0991934	1	+	+	+	-	-	-	Intron (XM_016911124.2/410044, intron 5 of 11)	7005875	7099161	93287	+	410044	XM_006560859.3
NC_037640.1	6986450	6986929	6986717;6986612;6986765	112	82	137	60	153	70	91	85	66	50	45	64	7.18454	4.52765	6.42804	3.4648	7.93716	3.90287	5.03148	3.88806	3.40896	2.6061	2.32944	3.6725	1.58681	1.85524	2.03367	1.29408	1.30807	0.634293	0.75864	0.0573463	1	+	+	+	-	-	-	Intron (XM_016911124.2/410044, intron 5 of 11)	7005875	7099161	93287	+	410044	XM_006560859.3
NC_037649.1	8177962	8178525	8178231;8178218;8178236	136	95	225	68	196	89	77	81	97	103	60	93	8.71046	5.2368	10.5271	3.9192	10.1534	4.9473	4.26582	3.70722	4.98624	5.3144	3.08904	5.311	1.66332	2.68603	2.05231	1.15068	0.938251	0.581631	1.2613	0.0331381	1	+	+	+	-	-	-	Promoter (1-2kb)	8176200	8192407	16208	+	410166	XM_026444391.1
NC_037647.1	9793120	9793573	9793289;9793310;9793360	135	58	132	75	135	71	112	93	81	61	64	80	8.64688	3.21845	6.19514	4.3168	7.00944	3.95784	6.17997	4.24974	4.17216	3.1682	3.2916	4.5765	2.68666	1.43512	1.77103	1.4542	1.31689	0.71924	0.755594	0.156043	1	+	+	+	-	-	-	Promoter (<=1kb)	9793469	9796029	2561	+	410202	XM_016914648.2
NC_037647.1	7690951	7691620	7691395;7691369;7691461	149	108	254	75	138	77	130	138	110	93	88	101	9.537	5.94595	11.8779	4.3168	7.16406	4.28766	7.16439	6.28419	5.64768	4.8034	4.50696	5.763	1.60395	2.75155	1.67086	1.14007	1.17577	0.782051	0.960003	0.10767	1	+	+	+	-	-	-	Distal Intergenic	7677418	7688077	10660	+	410222	XM_006564479.3
NC_037648.1	14047594	14048049	14047774;14047762;14047778	122	55	182	56	150	63	80	55	111	62	85	66	7.82034	3.0548	8.52414	3.2376	7.78254	3.51808	4.42989	2.53176	5.69856	3.2193	4.35504	3.7855	2.56002	2.63286	2.21216	1.74973	1.77012	1.15045	0.664989	0.0260547	1	+	+	+	-	-	-	Promoter (<=1kb)	14047473	14051542	4070	+	410257	XM_016914980.2
NC_037648.1	14143143	14143624	14143309;14143349;14143447	103	73	112	47	123	78	113	88	69	62	55	60	6.61232	4.0367	5.26354	2.7264	6.39096	4.34263	6.23466	4.02369	3.5616	3.2193	2.83584	3.4465	1.63805	1.93058	1.47168	1.54949	1.10633	0.822817	0.534993	0.118742	1	+	+	+	-	-	-	Intron (XM_006566532.3/410259, intron 3 of 12)	14089274	14160068	70795	-	410259	XM_006566532.3
NC_037648.1	14137371	14138071	14137583;14137853;14137814;14137852	207	85	213	97	238	132	149	104	111	106	117	116	13.2246	4.6913	9.96812	5.5664	12.3181	7.31101	8.2035	4.74705	5.69856	5.4677	5.97552	6.6105	2.81896	1.79077	1.68487	1.72813	1.04222	0.903944	0.776648	0.127575	1	+	+	+	-	-	-	Intron (XM_006566532.3/410259, intron 3 of 12)	14089274	14160068	70795	-	410259	XM_006566532.3
NC_037648.1	1670318	1670766	1670395;1670573;1670570	119	93	111	47	126	90	135	111	81	75	73	74	7.6296	5.1277	5.21696	2.7264	6.54558	5.00227	7.43784	5.06352	4.17216	3.8836	3.74736	4.2375	1.48792	1.9135	1.30852	1.46891	1.0743	0.884333	0.458534	0.160823	1	+	+	+	-	-	-	Intron (XM_006558933.3/410299, intron 4 of 13)	1521016	1699013	177998	-	410299	XM_006558933.3
NC_037648.1	7802601	7803124	7802762;7802950;7802934	167	90	134	69	140	83	111	104	81	111	58	62	10.6814	4.96405	6.2883	3.976	7.26714	4.61748	6.12528	4.74705	4.17216	5.7232	2.98776	3.5595	2.15175	1.58156	1.57383	1.29033	0.728991	0.839376	0.892577	0.0342659	1	+	+	+	-	-	-	Distal Intergenic	7355643	7784657	429015	-	410304	XM_026443963.1
NC_037648.1	10312614	10313083	10312851;10312796;10312815	134	71	175	77	147	71	107	84	76	76	79	84	8.5833	3.9276	8.19808	4.4304	7.62792	3.95784	5.90652	3.84285	3.91776	3.9347	4.0512	4.8025	2.18538	1.85042	1.92729	1.53702	0.995695	0.843561	0.820629	0.0369146	1	+	+	+	-	-	-	Intron (XM_006564320.3/410309, intron 1 of 4)	10215242	10294674	79433	-	410309	NM_001080110.1
NC_037648.1	10267353	10267768	10267542;10267567;10267533	145	54	161	62	168	55	73	107	70	68	43	62	9.28268	3.00025	7.54596	3.5784	8.71026	3.07832	4.04706	4.88268	3.61248	3.5259	2.22816	3.5595	3.09397	2.10875	2.82955	0.82886	1.02456	0.625976	1.69582	0.0146632	1	+	+	+	-	-	-	Intron (XM_006564318.3/410309, intron 1 of 4)	10210607	10275769	65163	-	410309	XM_006564318.3
NC_037648.1	10266334	10267189	10266514;10266928;10266967;10266733	216	145	196	103	272	95	122	127	87	137	102	97	13.7969	7.9643	9.17626	5.9072	14.0704	5.27712	6.72687	5.78688	4.47744	7.0518	5.21592	5.537	1.73234	1.5534	2.6663	1.16243	0.634936	0.942012	1.11954	0.0726159	1	+	+	+	-	-	-	Intron (XM_006564318.3/410309, intron 1 of 4)	10210607	10275769	65163	-	410309	XM_006564318.3
NC_037648.1	12738223	12738766	12738416;12738480;12738603	130	92	160	58	192	106	60	90	55	96	49	93	8.32898	5.07315	7.49938	3.3512	9.94722	5.88179	3.33609	4.11411	2.84928	4.9567	2.532	5.311	1.64178	2.23782	1.69119	0.81089	0.574834	0.476746	1.58066	0.0104277	1	+	+	+	-	-	-	Distal Intergenic	12712072	12721511	9440	-	410334	XM_006566376.3
NC_037648.1	12736810	12737515	12737139;12737158;12737166	280	111	334	98	357	109	106	136	59	105	50	146	17.866	6.1096	15.6043	5.6232	18.4513	6.0467	5.85183	6.19377	3.0528	5.4166	2.58264	8.3055	2.92425	2.77499	3.05147	0.944793	0.563601	0.310955	2.26598	0.0021711	1	+	+	+	-	-	-	Distal Intergenic	12712072	12721511	9440	-	410334	XM_006566376.3
NC_037648.1	12735643	12736472	12735857;12736257;12735874;12736279;12736293	235	128	244	110	310	88	110	112	57	124	59	132	15.0049	7.03695	11.4121	6.3048	16.0289	4.89233	6.07059	5.10873	2.95104	6.3875	3.0384	7.5145	2.1323	1.81007	3.27633	1.18828	0.462002	0.404338	1.81287	0.0401787	1	+	+	+	-	-	-	Distal Intergenic	12712072	12721511	9440	-	410334	XM_006566376.3
NC_037649.1	501812	503270	502351;502371;502344;502905;503049;503040	354	195	429	169	461	176	214	224	181	202	119	179	22.5709	10.6918	20.0294	9.656	23.8115	9.72969	11.7584	10.1723	9.26016	10.3733	6.0768	10.17	2.11105	2.0743	2.4473	1.15592	0.892692	0.597522	1.3257	0.00359343	1	+	+	+	-	-	-	Promoter (<=1kb)	501891	576852	74962	+	410353	XM_006557612.3
NC_037649.1	6732342	6733103	6732771;6732777;6732735	155	121	187	71	364	101	150	148	121	117	91	90	9.91848	6.6551	8.75704	4.0896	18.8121	5.60694	8.25819	6.73629	6.20736	6.0298	4.65888	5.1415	1.49036	2.14129	3.35515	1.22593	1.02945	0.906132	1.14402	0.141158	1	+	+	+	-	-	-	Distal Intergenic	6744576	6757060	12485	-	410363	XM_016915539.2
NC_037649.1	7051472	7051907	7051672;7051688;7051665	139	59	178	58	228	69	79	83	83	79	55	63	8.9012	3.273	8.33782	3.3512	11.8027	3.8479	4.3752	3.79764	4.27392	4.088	2.83584	3.616	2.71958	2.48801	3.06731	1.15208	1.04548	0.784248	1.47255	0.00180295	1	+	+	+	-	-	-	5' UTR	7044915	7062744	17830	+	410368	XM_006562260.3
NC_037649.1	7055443	7056260	7055986;7055803;7055971	251	117	226	95	338	110	176	158	94	128	78	116	16.0222	6.4369	10.5737	5.4528	17.4721	6.10167	9.68013	7.18839	4.8336	6.5919	4.00056	6.6105	2.48912	1.93913	2.86349	1.34663	0.733264	0.605183	1.4413	0.0128037	1	+	+	+	-	-	-	Exon (XM_006562260.3/410368, exon 5 of 13)	7044915	7062744	17830	+	410368	XM_006562260.3
NC_037649.1	8809089	8809661	8809257;8809340;8809488	148	79	152	52	141	69	119	100	73	79	60	65	9.47342	4.364	7.12674	3.0104	7.31868	3.8479	6.5628	4.56621	3.76512	4.088	3.08904	3.729	2.17081	2.36737	1.90199	1.43725	0.921018	0.828383	1.01506	0.0121713	1	+	+	+	-	-	-	Intron (XM_006566980.3/408390, intron 4 of 9)	8832683	8835212	2530	-	410388	XM_393868.5
NC_037649.1	10810421	10811507	10810537;10810828;10810630;10810885;10810929	246	137	227	143	320	146	224	161	131	149	106	156	15.7043	7.5279	10.6202	8.1792	16.5443	8.08059	12.3053	7.32402	6.71616	7.665	5.41848	8.8705	2.08615	1.29844	2.04741	1.68013	0.876211	0.610843	0.778283	0.143768	1	+	+	+	-	-	-	Intron (XM_026444171.1/410398, intron 2 of 7)	10759854	10818468	58615	-	410398	XM_026444171.1
NC_037650.1	2535323	2535724	2535504;2535503;2535509	144	76	177	67	182	69	58	83	78	75	52	65	9.2191	4.20035	8.29124	3.8624	9.43182	3.8479	3.22671	3.79764	4.01952	3.8836	2.68392	3.729	2.19484	2.14665	2.45116	0.849662	1.035	0.719743	1.38302	0.000448356	1	+	+	+	-	-	-	Promoter (1-2kb)	2534296	2536231	1936	+	410406	XM_393886.6
NC_037650.1	3508260	3508943	3508395;3508826;3508625;3508659	190	103	148	86	194	105	133	129	123	120	88	109	12.1438	5.6732	6.94042	4.9416	10.0503	5.82682	7.32846	5.8773	6.30912	6.1831	4.50696	6.215	2.14056	1.40449	1.72483	1.24691	1.02038	0.725175	0.816435	0.0497303	1	+	+	+	-	-	-	Downstream (<1kb)	3491942	3503730	11789	-	410413	XM_026444791.1
NC_037650.1	5096288	5097337	5096481;5096555;5097102;5097024;5097093	209	144	355	150	327	146	223	190	189	161	112	173	13.3518	7.90975	16.5825	8.5768	16.9051	8.08059	12.2506	8.63511	9.6672	8.2782	5.72232	9.831	1.68802	1.93341	2.09206	1.4187	1.16779	0.582069	0.850548	0.0572254	1	+	+	+	-	-	-	Intron (XM_026444737.1/410439, intron 3 of 7)	5078263	5154199	75937	+	410439	XM_026444738.1
NC_037650.1	6597667	6598154	6597991;6597997;6597990	149	90	146	65	150	62	64	108	65	89	66	94	9.537	4.96405	6.84726	3.7488	7.78254	3.46311	3.55485	4.92789	3.35808	4.599	3.39288	5.3675	1.92121	1.82652	2.24727	0.721374	0.730176	0.632116	1.52464	0.00675141	1	+	+	+	-	-	-	Distal Intergenic	6601727	6603603	1877	+	410459	XM_393939.6
NC_037650.1	6599545	6600985	6599721;6600236;6600735;6600183;6600200;6600740;6600732	407	195	526	163	328	164	188	202	143	179	149	147	25.9406	10.6918	24.5477	9.3152	16.9567	9.07005	10.3364	9.17763	7.32672	9.198	7.596	8.362	2.42621	2.63523	1.86953	1.12626	0.796556	0.908395	1.29164	0.0155292	1	+	+	+	-	-	-	Promoter (<=1kb)	6601727	6603603	1877	+	410459	XM_393939.6
NC_037650.1	8381316	8381882	8381613;8381653;8381611	164	73	143	72	191	93	97	107	110	84	79	87	10.4907	4.0367	6.70752	4.1464	9.89568	5.16718	5.35962	4.88268	5.64768	4.3435	4.0512	4.972	2.59883	1.61767	1.9151	1.09768	1.30026	0.814803	0.93246	0.0597913	1	+	+	+	-	-	-	Intron (XR_003305984.1/102655449, intron 3 of 5)	8361770	8365083	3314	+	410468	XM_393948.7
NC_037650.1	8407900	8408346	8408129;8408141;8408200	119	57	117	54	144	56	119	90	69	83	46	49	7.6296	3.1639	5.49644	3.124	7.4733	3.13329	6.5628	4.11411	3.5616	4.2924	2.38008	2.825	2.41145	1.75942	2.38513	1.59519	0.829746	0.842506	1.00465	0.0308458	1	+	+	+	-	-	-	Intron (XR_003305984.1/102655449, intron 3 of 5)	8361770	8365083	3314	+	410468	XM_393948.7
NC_037650.1	8666490	8666877	8666641;8666682;8666707	109	59	135	68	132	68	86	86	82	63	59	70	6.9938	3.273	6.33488	3.9192	6.85482	3.79293	4.75803	3.93327	4.22304	3.2704	3.0384	4.0115	2.13682	1.61637	1.80726	1.20969	1.29129	0.757422	0.771037	0.0273858	1	+	+	+	-	-	-	Distal Intergenic	8687783	8689533	1751	+	410469	XM_393949.6
NC_037651.1	7687687	7688074	7687855;7687875;7687919	87	69	121	62	109	77	95	68	56	68	24	58	5.59504	3.8185	5.68276	3.5784	5.6694	4.28766	5.25024	3.11949	2.90016	3.5259	1.266	3.3335	1.46525	1.58807	1.32226	1.68304	0.82253	0.379781	0.600724	0.322812	1	+	+	+	-	-	-	Distal Intergenic	7693270	7711431	18162	+	410509	XM_026444892.1
NC_037651.1	7688987	7689711	7689069;7689366;7689240;7689438	181	104	205	95	191	80	132	140	81	145	57	110	11.5716	5.72775	9.59548	5.4528	9.89568	4.45257	7.27377	6.37461	4.17216	7.4606	2.93712	6.2715	2.02027	1.75973	2.22246	1.14105	0.559226	0.468328	1.46879	0.0106451	1	+	+	+	-	-	-	Distal Intergenic	7693270	7711431	18162	+	410509	XM_026444892.1
NC_037651.1	7694497	7694904	7694647;7694720;7694734	139	74	140	57	127	60	85	80	71	77	50	56	8.9012	4.09125	6.56778	3.2944	6.59712	3.35317	4.70334	3.66201	3.66336	3.9858	2.58264	3.2205	2.17567	1.99362	1.96743	1.28436	0.919103	0.801938	1.02991	0.00910636	1	+	+	+	-	-	-	Promoter (1-2kb)	7693278	7711431	18154	+	410509	XM_026444894.1
NC_037651.1	7833018	7833412	7833169;7833223;7833158	102	67	128	56	120	61	88	68	82	69	59	79	6.54874	3.7094	6.00882	3.2376	6.23634	3.40814	4.86741	3.11949	4.22304	3.577	3.0384	4.52	1.76544	1.85595	1.82984	1.56032	1.18061	0.672212	0.67548	0.116923	1	+	+	+	-	-	-	Promoter (2-3kb)	7830535	7841278	10744	+	410515	XM_006562940.3
NC_037652.1	3147634	3148152	3147843;3147898;3147916	143	101	220	75	154	68	112	112	71	75	101	89	9.15552	5.5641	10.2942	4.3168	7.9887	3.79293	6.17997	5.10873	3.66336	3.8836	5.16528	5.085	1.64546	2.38468	2.10621	1.20969	0.94329	1.01579	0.953461	0.0321941	1	+	+	+	-	-	-	Distal Intergenic	3070981	3076631	5651	-	410633	XM_026445410.1
NC_037638.1	23060692	23061151	23060783;23060864;23061016	123	68	106	42	134	92	89	82	52	92	45	85	7.88392	3.76395	4.98406	2.4424	6.9579	5.11221	4.9221	3.75243	2.69664	4.7523	2.32944	4.859	2.09459	2.04064	1.36104	1.31171	0.567439	0.479407	1.22055	0.0424717	1	+	+	+	-	-	-	Intron (XM_026446141.1/410662, intron 2 of 9)	22860374	23133761	273388	-	410662	XM_026446141.1
NC_037638.1	21666718	21667162	21666910;21666903;21666981	105	73	174	84	162	63	97	96	86	80	79	60	6.73948	4.0367	8.1515	4.828	8.40102	3.51808	5.35962	4.38537	4.42656	4.1391	4.0512	3.4465	1.66955	1.68838	2.38796	1.22216	1.06945	1.17545	0.728816	0.0798337	1	+	+	+	-	-	-	Intron (XM_003251682.4/410674, intron 3 of 10)	21546146	21687190	141045	-	410674	XM_003251682.4
NC_037638.1	21661769	21662159	21661947;21661974;21661956	130	82	169	60	200	55	87	77	52	52	65	49	8.32898	4.52765	7.9186	3.4648	10.3595	3.07832	4.81272	3.52638	2.69664	2.7083	3.34224	2.825	1.83958	2.28544	3.36531	1.36478	0.995695	1.18309	1.07983	0.0938597	1	+	+	+	-	-	-	Intron (XM_003251682.4/410674, intron 3 of 10)	21546146	21687190	141045	-	410674	XM_003251682.4
NC_037638.1	21639617	21640265	21640009;21639913;21639885	197	126	179	90	220	112	140	116	89	95	70	86	12.5888	6.92785	8.3844	5.1688	11.3903	6.21161	7.71129	5.28957	4.5792	4.9056	3.59544	4.9155	1.81713	1.62212	1.83371	1.45783	0.933464	0.731449	0.755799	0.0691644	1	+	+	+	-	-	-	Intron (XM_003251682.4/410674, intron 5 of 10)	21546146	21687190	141045	-	410674	XM_003251682.4
NC_037638.1	21637264	21637788	21637435;21637470;21637499	125	105	148	51	164	60	117	75	89	52	50	47	8.01108	5.7823	6.94042	2.9536	8.5041	3.35317	6.45342	3.43596	4.5792	2.7083	2.58264	2.712	1.38545	2.34982	2.53614	1.8782	1.6908	0.952301	0.47205	0.272405	1	+	+	+	-	-	-	Intron (XM_003251682.4/410674, intron 5 of 10)	21546146	21687190	141045	-	410674	XM_003251682.4
NC_037638.1	12635813	12636233	12635952;12635974;12636038	123	70	120	33	151	64	64	83	54	62	72	50	7.88392	3.87305	5.63618	1.9312	7.83408	3.57305	3.55485	3.79764	2.7984	3.2193	3.69672	2.8815	2.03558	2.91849	2.19255	0.936068	0.869257	1.28292	1.21048	0.0228906	1	+	+	+	-	-	-	Promoter (<=1kb)	12636706	13027097	390392	+	410718	XM_016913622.2
NC_037638.1	12430960	12432626	12431284;12431969;12432441;12431253;12432029;12431894;12432338	508	245	364	196	525	267	256	247	148	264	120	172	32.3622	13.4193	17.0017	11.1896	27.11	14.732	14.0553	11.2121	7.58112	13.5415	6.12744	9.7745	2.41162	1.51942	1.84021	1.25358	0.559843	0.62688	1.24182	0.0326935	1	+	+	+	-	-	-	3' UTR	12430289	12437835	7547	-	410723	XM_006570110.3
NC_037638.1	11224565	11225002	11224817;11224802;11224820	128	79	160	82	137	56	87	96	90	73	81	60	8.20182	4.364	7.49938	4.7144	7.11252	3.13329	4.81272	4.38537	4.63008	3.7814	4.15248	3.4465	1.87943	1.59074	2.26998	1.09745	1.22444	1.20484	0.70276	0.0592524	1	+	+	+	-	-	-	Intron (XM_006569610.3/410724, intron 1 of 6)	11205469	11217975	12507	-	410724	XM_394201.6
NC_037638.1	7168295	7168707	7168533;7168495;7168517	112	88	134	54	115	56	84	86	66	66	34	50	7.18454	4.85495	6.2883	3.124	5.97864	3.13329	4.64865	3.93327	3.40896	3.4237	1.7724	2.8815	1.47984	2.0129	1.9081	1.18188	0.995695	0.615096	0.951539	0.0203639	1	+	+	+	-	-	-	Exon (XM_006565292.3/410739, exon 4 of 11)	7153474	7174971	21498	-	410739	XM_006565292.3
NC_037638.1	3121147	3122455	3121412;3121847;3122010;3122036	160	129	357	96	205	109	105	131	164	124	155	129	10.2364	7.0915	16.6756	5.5096	10.6172	6.0467	5.79714	5.96772	8.3952	6.3875	7.89984	7.345	1.44347	3.02664	1.75587	0.971416	1.31432	1.07554	0.889295	0.182941	1	+	+	+	-	-	-	Distal Intergenic	3160299	3166163	5865	+	410757	XM_394233.7
NC_037638.1	2787959	2788356	2788153;2788181;2788116	139	54	115	43	127	70	104	60	74	57	58	68	8.9012	3.00025	5.40328	2.4992	6.59712	3.90287	5.74245	2.75781	3.816	2.9638	2.98776	3.8985	2.96682	2.162	1.69033	2.08225	1.28754	0.766387	0.721295	0.169389	1	+	+	+	-	-	-	Intron (XM_026439028.1/410758, intron 3 of 6)	2689534	3119244	429711	+	410758	XM_026438987.1
NC_037638.1	416191	417921	416373;416627;417303;417791;416842;417343;417819;416873	483	271	339	204	489	211	279	283	217	279	110	214	30.7727	14.8376	15.8372	11.644	25.2546	11.6536	15.3132	12.8396	11.0918	14.308	5.62104	12.1475	2.07397	1.36012	2.16711	1.19265	0.775217	0.462732	1.20442	0.0347853	1	+	+	+	-	-	-	Exon (XM_026446225.1/551203, exon 41 of 54)	424032	484720	60689	+	410771	XM_016918148.2
NC_037638.1	24811368	24812272	24811606;24812049;24811594;24811590;24812098;24812087	226	153	370	98	268	88	105	136	115	97	79	97	14.4327	8.4007	17.2812	5.6232	13.8643	4.89233	5.79714	6.19377	5.90208	5.0078	4.0512	5.537	1.71804	3.0732	2.83388	0.935963	1.17858	0.73166	1.42172	0.0518488	1	+	+	+	-	-	-	Intron (XM_026446254.1/410780, intron 2 of 5)	24729432	24824586	95155	-	410780	XM_026446254.1
NC_037639.1	15440850	15441728	15441015;15441089;15441454;15441546	198	126	203	110	229	110	146	141	132	115	119	124	12.6524	6.92785	9.50232	6.3048	11.8542	6.10167	8.03943	6.41982	6.76704	5.9276	6.0768	7.0625	1.82631	1.50716	1.94278	1.25228	1.14162	0.860432	0.697151	0.0186295	1	+	+	+	-	-	-	Distal Intergenic	15444872	15446993	2122	+	410812	XM_006568776.3
NC_037639.1	14141832	14142238	14142009;14142078;14142025	152	78	138	56	162	79	50	67	48	90	33	83	9.72774	4.30945	6.47462	3.2376	8.40102	4.3976	2.78919	3.07428	2.49312	4.6501	1.72176	4.746	2.2573	1.99982	1.91036	0.907266	0.536143	0.362781	1.77173	0.00292941	1	+	+	+	-	-	-	Promoter (1-2kb)	14143423	14158506	15084	+	410818	XM_016917992.2
NC_037639.1	11454237	11455104	11454503;11454805;11454641;11454728;11454683	193	119	211	107	229	92	157	183	96	126	97	157	12.3345	6.546	9.87496	6.1344	11.8542	5.11221	8.64102	8.31864	4.93536	6.4897	4.96272	8.927	1.88428	1.60977	2.3188	1.03875	0.760491	0.555922	1.30342	0.0133287	1	+	+	+	-	-	-	Distal Intergenic	11377344	11442602	65259	-	410866	XM_394342.7
NC_037640.1	12051616	12051928	12051772;12051815;12051793	70	30	102	47	99	56	64	56	61	70	49	42	4.51418	1.69105	4.79774	2.7264	5.154	3.13329	3.55485	2.57697	3.15456	3.6281	2.532	2.4295	2.66945	1.75973	1.64492	1.37947	0.86948	1.04219	0.884085	0.0858407	1	+	+	+	-	-	-	Intron (XM_026439425.1/410918, intron 3 of 3)	12034869	12069261	34393	+	410918	XM_026439426.1
NC_037640.1	6627076	6627578	6627223;6627214;6627433	131	106	130	36	144	76	100	84	64	118	49	87	8.39256	5.83685	6.10198	2.1016	7.4733	4.23269	5.52369	3.84285	3.3072	6.0809	2.532	4.972	1.43786	2.90349	1.76561	1.43739	0.543867	0.509252	1.29401	0.0974092	1	+	+	+	-	-	-	Intron (XM_001120757.5/724853, intron 4 of 6)	6697404	6701280	3877	-	410941	XM_394417.6
NC_037640.1	3657328	3657830	3657658;3657643;3657639	172	84	174	76	164	78	120	110	77	96	86	74	10.9993	4.63675	8.1515	4.3736	8.5041	4.34263	6.61749	5.01831	3.96864	4.9567	4.40568	4.2375	2.3722	1.8638	1.95828	1.31867	0.800662	1.03969	0.97146	0.00950318	1	+	+	+	-	-	-	Intron (XM_026439742.1/410967, intron 2 of 12)	3567413	3646936	79524	-	410967	XM_026439741.1
NC_037641.1	11045609	11046123	11045827;11045914;11045860	148	89	148	58	126	86	90	96	92	57	55	65	9.47342	4.9095	6.94042	3.3512	6.54558	4.78239	4.97679	4.38537	4.73184	2.9638	2.83584	3.729	1.92961	2.07103	1.36868	1.13486	1.59654	0.760483	0.620731	0.125919	1	+	+	+	-	-	-	Promoter (<=1kb)	10799631	11045991	246361	-	411018	XM_016911633.2
NC_037641.1	9285906	9286234	9286061;9286031;9286094	107	67	100	41	109	52	74	54	51	80	71	51	6.86664	3.7094	4.70458	2.3856	5.6694	2.91341	4.10175	2.48655	2.64576	4.1391	3.64608	2.938	1.85115	1.97207	1.94597	1.64957	0.639211	1.24101	0.708784	0.123836	1	+	+	+	-	-	-	Exon (XM_026440246.1/411023, exon 3 of 39)	9277880	9298041	20162	+	411023	XM_016911799.2
NC_037641.1	4183087	4183485	4183284;4183250;4183306	100	72	115	43	130	74	93	72	86	61	55	72	6.42158	3.98215	5.40328	2.4992	6.75174	4.12275	5.14086	3.30033	4.42656	3.1682	2.83584	4.1245	1.61259	2.162	1.63768	1.55768	1.39718	0.68756	0.571336	0.150962	1	+	+	+	-	-	-	Intron (XM_006558671.3/411054, intron 1 of 11)	4012157	4194428	182272	-	411054	XM_006558671.3
NC_037642.1	1871927	1872522	1872138;1872247;1872434;1872351	171	95	150	73	169	88	123	94	76	114	68	93	10.9358	5.2368	7.03358	4.2032	8.7618	4.89233	6.78156	4.29495	3.91776	5.8765	3.49416	5.311	2.08826	1.67339	1.79093	1.57896	0.666683	0.65791	0.935337	0.0862646	1	+	+	+	-	-	-	Distal Intergenic	1759897	1838178	78282	-	411058	XM_026440871.1
NC_037642.1	1866789	1867300	1867083;1867013;1867060	173	59	242	84	180	73	78	79	59	55	52	49	11.0629	3.273	11.3189	4.828	9.32874	4.06778	4.32051	3.6168	3.0528	2.8616	2.68392	2.825	3.38005	2.34443	2.29332	1.19457	1.06682	0.95006	1.31999	0.0409675	1	+	+	+	-	-	-	Distal Intergenic	1759897	1838178	78282	-	411058	XM_026440871.1
NC_037642.1	1857413	1858686	1858008;1858309;1857608;1858128;1857714;1857987	362	157	292	178	316	158	190	193	142	196	124	158	23.0795	8.6189	13.6479	10.1672	16.3382	8.74023	10.4458	8.77074	7.27584	10.0667	6.33	8.9835	2.67778	1.34235	1.86931	1.19098	0.722763	0.704625	1.16946	0.0912932	1	+	+	+	-	-	-	Distal Intergenic	1759897	1838178	78282	-	411058	XM_026440871.1
NC_037642.1	1822648	1823608	1822863;1822834;1822986	280	151	278	165	201	146	178	151	144	162	99	115	17.866	8.2916	12.9958	9.4288	10.4111	8.08059	9.78951	6.87192	7.3776	8.3293	5.064	6.554	2.15471	1.37831	1.28841	1.42457	0.885741	0.772658	0.645142	0.170726	1	+	+	+	-	-	-	Intron (XM_026440871.1/411058, intron 1 of 10)	1759897	1838178	78282	-	411058	XM_026440871.1
NC_037642.1	1797896	1798415	1798116;1798152;1798143	152	91	213	81	179	83	113	97	122	85	104	77	9.72774	5.0186	9.96812	4.6576	9.2772	4.61748	6.23466	4.43058	6.25824	4.3946	5.3172	4.407	1.93834	2.14018	2.00915	1.40719	1.42408	1.20654	0.592321	0.00191316	1	+	+	+	-	-	-	Intron (XM_026440871.1/411058, intron 4 of 10)	1759897	1838178	78282	-	411058	XM_026440871.1
NC_037642.1	1881370	1881885	1881604;1881561;1881502;1881778	148	108	175	57	142	83	90	101	74	107	43	84	9.47342	5.94595	8.19808	3.2944	7.37022	4.61748	4.97679	4.61142	3.816	5.5188	2.22816	4.8025	1.59326	2.48849	1.59616	1.07923	0.691455	0.463958	1.34531	0.0400935	1	+	+	+	-	-	-	Distal Intergenic	1891476	1919292	27817	-	411059	XM_026440840.1
NC_037642.1	6352891	6353497	6353073;6353120;6353157	149	99	155	79	199	98	118	105	74	91	60	128	9.537	5.455	7.26648	4.544	10.308	5.44203	6.50811	4.79226	3.816	4.7012	3.08904	7.2885	1.7483	1.59914	1.89415	1.35805	0.811708	0.423824	1.01506	0.0714721	1	+	+	+	-	-	-	Distal Intergenic	6390669	6523535	132867	+	411079	XM_006562116.3
NC_037642.1	8777227	8777650	8777402;8777444;8777466	135	57	126	61	114	54	91	87	65	81	50	65	8.64688	3.1639	5.91566	3.5216	5.9271	3.02335	5.03148	3.97848	3.35808	4.1902	2.58264	3.729	2.73298	1.67982	1.96044	1.26467	0.801413	0.692582	1.20806	0.0415535	1	+	+	+	-	-	-	Intron (XM_006565579.3/100576196, intron 3 of 11)	8838191	8841522	3332	-	411095	XM_003250636.3
NC_037642.1	13537318	13538027	13537494;13537830;13537591;13537556	155	97	158	94	233	102	160	146	91	127	86	109	9.91848	5.3459	7.40622	5.396	12.0604	5.66191	8.80509	6.64587	4.68096	6.5408	4.40568	6.215	1.85534	1.37254	2.13009	1.3249	0.715656	0.708879	0.962555	0.0450611	1	+	+	+	-	-	-	Promoter (2-3kb)	13540897	13561269	20373	+	411133	XM_026440865.1
NC_037643.1	12633146	12633622	12633357;12633372;12633413	118	84	155	59	155	53	79	100	58	40	77	61	7.56602	4.63675	7.26648	3.408	8.04024	2.96838	4.3752	4.56621	3.00192	2.0951	3.94992	3.503	1.63175	2.13218	2.70863	0.958169	1.43283	1.12758	0.879344	0.0694505	1	+	+	+	-	-	-	Intron (XM_006569976.3/411155, intron 8 of 25)	12702838	12914327	211490	+	411155	XM_006569980.3
NC_037643.1	12680912	12681375	12681025;12681106;12681216	118	84	108	48	118	61	85	102	48	75	31	75	7.56602	4.63675	5.07722	2.7832	6.13326	3.40814	4.70334	4.65663	2.49312	3.8836	1.62048	4.294	1.63175	1.82424	1.79959	1.01003	0.641961	0.377382	1.37282	0.0195576	1	+	+	+	-	-	-	Intron (XM_006569976.3/411155, intron 8 of 25)	12702838	12914327	211490	+	411155	XM_006569980.3
NC_037643.1	12721011	12721398	12721167;12721229;12721230	94	64	99	58	83	39	72	74	19	70	17	72	6.0401	3.54575	4.658	3.3512	4.32936	2.1988	3.99237	3.39075	1.0176	3.6281	0.91152	4.1245	1.70348	1.38995	1.96896	1.17743	0.280477	0.221001	1.5923	0.0473558	1	+	+	+	-	-	-	Exon (XM_006569976.3/411155, exon 9 of 26)	12702838	12914327	211490	+	411155	XM_006569980.3
NC_037643.1	12724239	12725419	12724433;12724617;12724502;12724644;12724505;12725231	213	164	368	144	238	134	112	157	128	148	63	125	13.6061	9.00075	17.188	8.236	12.3181	7.42095	6.17997	7.14318	6.56352	7.6139	3.24096	7.119	1.51166	2.08694	1.65991	0.865157	0.862044	0.455255	1.2687	0.0108152	1	+	+	+	-	-	-	Intron (XM_006569976.3/411155, intron 9 of 25)	12702838	12914327	211490	+	411155	XM_006569980.3
NC_037643.1	12725862	12727455	12726119;12726898;12726098;12726119;12726911;12726995	241	158	521	156	254	146	146	215	119	179	114	177	15.3864	8.67345	24.3148	8.9176	13.1427	8.08059	8.03943	9.76536	6.1056	9.198	5.8236	10.057	1.77397	2.72661	1.62645	0.82326	0.663796	0.579059	1.56827	0.0538453	1	+	+	+	-	-	-	Intron (XM_006569976.3/411155, intron 9 of 25)	12702838	12914327	211490	+	411155	XM_006569980.3
NC_037643.1	12727946	12728576	12728309;12728272;12728324	175	80	234	79	143	82	105	115	90	107	53	98	11.1901	4.41855	10.9463	4.544	7.42176	4.56251	5.79714	5.24436	4.63008	5.5188	2.73456	5.5935	2.53253	2.40896	1.62668	1.1054	0.838965	0.488882	1.43261	0.0207517	1	+	+	+	-	-	-	Intron (XM_006569976.3/411155, intron 9 of 25)	12702838	12914327	211490	+	411155	XM_006569980.3
NC_037643.1	12734525	12735350	12734935;12735012;12735042	147	120	253	79	173	82	108	121	69	120	95	98	9.40984	6.60055	11.8313	4.544	8.96796	4.56251	5.96121	5.51562	3.5616	6.1831	4.86144	5.5935	1.42561	2.60372	1.96558	1.08079	0.576022	0.869123	1.24692	0.0599731	1	+	+	+	-	-	-	Intron (XM_006569976.3/411155, intron 9 of 25)	12702838	12914327	211490	+	411155	XM_006569980.3
NC_037643.1	12739073	12743852	12739429;12740348;12740723;12741275;12741816;12742593;12742963;12743647;12739411;12739459;12740260;12740735;12740714;12741769;12741824;12742557;12743080;12742571;12743061;12743666	994	570	2098	439	996	477	492	595	430	464	293	506	63.2621	31.1481	97.7714	24.992	51.3854	26.2757	26.9622	26.9452	21.9293	23.7615	14.8882	28.6455	2.03101	3.91211	1.95562	1.00063	0.922892	0.51974	1.69281	0.0978426	1	+	+	+	-	-	-	Intron (XM_006569976.3/411155, intron 9 of 25)	12702838	12914327	211490	+	411155	XM_006569980.3
NC_037643.1	12747975	12748532	12748219;12748311;12748384	179	74	182	92	154	60	110	100	80	90	53	66	11.4444	4.09125	8.52414	5.2824	7.9887	3.35317	6.07059	4.56621	4.12128	4.6501	2.73456	3.7855	2.79729	1.61369	2.38243	1.32946	0.886278	0.722377	1.20924	0.0458803	1	+	+	+	-	-	-	Intron (XM_006569976.3/411155, intron 9 of 25)	12702838	12914327	211490	+	411155	XM_006569980.3
NC_037643.1	10782479	10782760	10782606;10782604;10782610	77	33	95	36	101	48	71	56	47	38	50	26	4.95924	1.8547	4.47168	2.1016	5.25708	2.69353	3.93768	2.57697	2.44224	1.9929	2.58264	1.5255	2.67388	2.12775	1.95174	1.52803	1.22547	1.69298	0.602945	0.0500097	1	+	+	+	-	-	-	Intron (XM_026441373.1/411158, intron 4 of 7)	10822184	10848372	26189	+	411158	XM_026441375.1
NC_037644.1	13940428	13942079	13941145;13940641;13941176;13941671;13941679	523	225	399	219	502	216	283	286	191	275	143	213	33.3159	12.3283	18.632	12.496	25.9246	11.9285	15.532	12.9753	9.76896	14.1036	7.29216	12.091	2.70239	1.49104	2.17333	1.19704	0.692657	0.603106	1.35279	0.0464926	1	+	+	+	-	-	-	Promoter (<=1kb)	13941732	13948207	6476	+	411189	XM_394663.7
NC_037644.1	11778811	11779269	11779056;11778988;11779095	169	82	122	63	125	75	125	91	73	111	52	79	10.8086	4.52765	5.72934	3.6352	6.49404	4.17772	6.89094	4.15932	3.76512	5.7232	2.68392	4.52	2.38724	1.57607	1.55445	1.65675	0.65787	0.593788	0.923855	0.122735	1	+	+	+	-	-	-	Intron (XM_394686.7/411212, intron 2 of 8)	11685736	11807792	122057	+	411212	XM_394686.7
NC_037644.1	11620607	11620961	11620786;11620804;11620816	88	59	115	43	130	60	78	57	54	59	35	70	5.65862	3.273	5.40328	2.4992	6.75174	3.35317	4.32051	2.62218	2.7984	3.066	1.82304	4.0115	1.72888	2.162	2.01354	1.64768	0.91272	0.454453	0.969709	0.0956631	1	+	+	+	-	-	-	Distal Intergenic	11337306	11563898	226593	-	411213	XM_394687.6
NC_037645.1	4944918	4945248	4945091;4945069;4945085	98	54	99	44	114	51	109	92	86	63	80	37	6.29442	3.00025	4.658	2.556	5.9271	2.85844	6.0159	4.20453	4.42656	3.2704	4.10184	2.147	2.09797	1.82238	2.07354	1.43081	1.35352	1.9105	0.352418	0.114446	1	+	+	+	-	-	-	Intron (XM_006561437.3/408960, intron 2 of 30)	5054745	5076070	21326	+	411248	XM_026442069.1
NC_037645.1	11103197	11104693	11103342;11103653;11104130;11104563;11103933;11104052	311	235	283	186	399	157	245	251	178	193	125	201	19.837	12.8738	13.2287	10.6216	20.616	8.68526	13.4537	11.3929	9.10752	9.9134	6.38064	11.413	1.54088	1.24545	2.37368	1.18088	0.918708	0.559068	0.956675	0.11602	1	+	+	+	-	-	-	5' UTR	10955749	11127448	171700	-	411288	XM_006568525.3
NC_037645.1	12236164	12236532	12236306;12236328;12236380	71	29	110	46	94	34	60	68	74	36	93	52	4.57776	1.6365	5.17038	2.6696	4.8963	1.92395	3.33609	3.11949	3.816	1.8907	4.76016	2.9945	2.79729	1.93676	2.54492	1.06943	2.0183	1.58963	0.638037	0.0820381	1	+	+	+	-	-	-	Promoter (<=1kb)	12226610	12236515	9906	-	411290	XM_006569772.3
NC_037646.1	4534524	4535084	4534657;4534930;4534848;4534843	128	101	146	81	166	85	107	105	79	106	44	90	8.20182	5.5641	6.84726	4.6576	8.60718	4.72742	5.90652	4.79226	4.0704	5.4677	2.2788	5.1415	1.47406	1.47013	1.82069	1.23251	0.744445	0.443217	0.977329	0.0571733	1	+	+	+	-	-	-	Intron (XM_026443081.1/411345, intron 1 of 11)	4477114	4865425	388312	+	411345	XM_026443079.1
NC_037652.1	699129	699517	699312;699324;699343	86	43	106	55	138	48	74	84	67	60	71	39	5.53146	2.4002	4.98406	3.1808	7.16406	2.69353	4.10175	3.84285	3.45984	3.1171	3.64608	2.26	2.30458	1.56692	2.65973	1.06737	1.10995	1.61331	0.784915	0.0857986	1	+	+	+	-	-	-	Intron (XM_026445494.1/411463, intron 3 of 13)	665447	730529	65083	-	411463	XM_026445493.1
NC_037643.1	15990228	15990616	15990413;15990395;15990372	125	88	126	53	137	69	87	75	53	57	74	36	8.01108	4.85495	5.91566	3.0672	7.11252	3.8479	4.81272	3.43596	2.74752	2.9638	3.798	2.0905	1.65008	1.92868	1.84842	1.40069	0.927026	1.81679	0.389003	0.232921	1	+	+	+	-	-	-	Intron (XM_006570937.3/411670, intron 1 of 8)	15942286	15971493	29208	-	411670	XM_006570938.3
NC_037652.1	1640985	1641363	1641175;1641177;1641175	97	52	144	64	129	54	85	93	85	76	49	54	6.23084	2.89115	6.7541	3.692	6.7002	3.02335	4.70334	4.24974	4.37568	3.9347	2.532	3.1075	2.15514	1.82939	2.21615	1.10674	1.11207	0.814803	1.03139	0.00279667	1	+	+	+	-	-	-	Intron (XM_026445646.1/411827, intron 3 of 10)	1632102	1744537	112436	+	411827	XM_026445647.1
NC_037638.1	5346942	5347343	5347125;5347175;5347181	116	50	145	66	121	59	62	83	43	75	48	56	7.43886	2.78205	6.80068	3.8056	6.28788	3.2982	3.44547	3.79764	2.23872	3.8836	2.48136	3.2205	2.67388	1.78702	1.90646	0.907266	0.576455	0.770489	1.49807	0.028229	1	+	+	+	-	-	-	Promoter (1-2kb)	5335059	5345749	10691	-	412285	XM_016911667.2
NC_037648.1	10486009	10486983	10486214;10486246;10486759;10486196	171	135	412	100	232	100	89	143	135	147	138	75	10.9358	7.4188	19.2375	5.7368	12.0088	5.55197	4.9221	6.51024	6.91968	7.5628	7.03896	4.294	1.47407	3.35335	2.16298	0.756055	0.914963	1.63925	1.07842	0.141293	1	+	+	+	-	-	-	Intron (XM_016914960.2/412591, intron 1 of 12)	10422253	10496583	74331	-	412591	XM_016914960.2
NC_037644.1	10937143	10937467	10937319;10937281;10937300	67	20	86	35	79	37	50	46	57	36	46	24	4.32344	1.14555	4.05246	2.0448	4.1232	2.08886	2.78919	2.12487	2.95104	1.8907	2.38008	1.4125	3.77412	1.98184	1.9739	1.31264	1.56082	1.68501	0.761891	0.216665	1	+	+	+	-	-	-	Promoter (1-2kb)	10935442	10936587	1146	+	412806	XM_396259.7
NC_037648.1	1868943	1869328	1869116;1869152;1869115	85	50	121	36	143	63	85	68	87	62	90	71	5.46788	2.78205	5.68276	2.1016	7.42176	3.51808	4.70334	3.11949	4.47744	3.2193	4.60824	4.068	1.96541	2.70402	2.10961	1.50773	1.39081	1.1328	0.74982	0.0376591	1	+	+	+	-	-	-	Intron (XM_006558939.3/412839, intron 2 of 5)	1865557	1885038	19482	+	412839	XM_006558940.3
NC_037648.1	1719088	1719503	1719250;1719203;1719359;1719262	115	74	132	74	168	79	87	107	69	92	51	56	7.37528	4.09125	6.19514	4.26	8.71026	4.3976	4.81272	4.88268	3.5616	4.7523	2.63328	3.2205	1.8027	1.45426	1.98068	0.985672	0.749448	0.817662	1.03685	0.0159267	1	+	+	+	-	-	-	Intron (XM_396292.7/412840, intron 1 of 6)	1708582	1798568	89987	+	412840	XM_396292.7
NC_037642.1	3989703	3991288	3990153;3990810;3990099;3990991;3990126;3990891	528	216	784	184	478	171	198	231	166	196	148	203	33.6338	11.8374	36.5653	10.508	24.6877	9.45484	10.8833	10.4887	8.49696	10.0667	7.54536	11.526	2.84132	3.47976	2.61112	1.03762	0.844066	0.654638	1.81627	0.00686471	1	+	+	+	-	-	-	Distal Intergenic	3787620	3956688	169069	-	412859	XM_006560711.3
NC_037647.1	4713138	4713867	4713354;4713367;4713395	115	88	255	81	98	82	73	102	81	89	69	90	7.37528	4.85495	11.9245	4.6576	5.10246	4.56251	4.04706	4.65663	4.17216	4.599	3.5448	5.1415	1.51913	2.56022	1.11834	0.869096	0.907189	0.689449	1.07586	0.165346	1	+	+	+	-	-	-	Intron (XM_396315.7/412863, intron 3 of 14)	4700579	4797555	96977	+	412863	XM_396315.7
NC_037643.1	6672699	6673118	6672904;6672891;6672928	132	41	157	51	179	52	70	70	84	86	84	62	8.45614	2.2911	7.35964	2.9536	9.2772	2.91341	3.88299	3.20991	4.3248	4.4457	4.3044	3.5595	3.69086	2.49175	3.18431	1.20969	0.972805	1.20927	1.46554	0.0244322	1	+	+	+	-	-	-	Promoter (<=1kb)	6672885	6879457	206573	+	412917	XM_026441542.1
NC_037651.1	3366952	3367325	3367142;3367146;3367140	93	48	136	60	157	50	61	75	45	73	21	66	5.97652	2.67295	6.38146	3.4648	8.14332	2.80347	3.39078	3.43596	2.34048	3.7814	1.11408	3.7855	2.23593	1.8418	2.90473	0.986851	0.618945	0.294302	1.87766	0.0145444	1	+	+	+	-	-	-	Promoter (2-3kb)	3364830	3380149	15320	+	412927	XM_006559991.3
NC_037642.1	8246661	8247059	8246831;8246864;8246912	93	58	131	62	126	43	99	91	96	58	66	82	5.97652	3.21845	6.14856	3.5784	6.54558	2.41868	5.469	4.15932	4.93536	3.0149	3.39288	4.6895	1.85696	1.71824	2.70626	1.31488	1.63699	0.723506	0.773209	0.102041	1	+	+	+	-	-	-	Promoter (<=1kb)	8247612	8255963	8352	+	412968	XM_016912362.2
NC_037643.1	4001268	4001988	4001463;4001544;4001614;4001801	174	90	182	75	230	94	142	127	101	89	92	108	11.1265	4.96405	8.52414	4.3168	11.9057	5.22215	7.82067	5.78688	5.18976	4.599	4.70952	6.1585	2.24142	1.97464	2.27985	1.35145	1.12845	0.764719	1.00148	0.0102788	1	+	+	+	-	-	-	Intron (XM_016912693.2/413005, intron 1 of 6)	3962742	4005637	42896	-	413005	XM_016912693.2
NC_037643.1	8600132	8600520	8600343;8600358;8600355	98	63	124	63	110	44	76	63	54	45	40	60	6.29442	3.4912	5.8225	3.6352	5.72094	2.47365	4.21113	2.89344	2.7984	2.3506	2.07624	3.4465	1.80294	1.6017	2.31275	1.45541	1.1905	0.60242	0.815659	0.0685767	1	+	+	+	-	-	-	Intron (XR_003304787.1/100578461, intron 3 of 3)	8519242	8616680	97439	-	413076	XM_006565395.3
NC_037649.1	4707585	4707999	4707729;4707737;4707833	84	47	142	66	128	65	100	94	82	51	74	69	5.4043	2.6184	6.66094	3.8056	6.64866	3.62802	5.52369	4.29495	4.22304	2.6572	3.798	3.955	2.06397	1.7503	1.83259	1.28609	1.58928	0.960303	0.557967	0.059932	1	+	+	+	-	-	-	Intron (XM_016915530.2/413125, intron 1 of 6)	4700015	4896125	196111	+	413125	XM_016915530.2
NC_037649.1	699012	699365	699174;699166;699167	98	70	112	45	105	56	54	78	58	72	38	65	6.29442	3.87305	5.26354	2.6128	5.46324	3.13329	3.00795	3.57159	3.00192	3.7303	1.97496	3.729	1.62518	2.01452	1.74361	0.842188	0.80474	0.529622	1.30645	0.00233242	1	+	+	+	-	-	-	Distal Intergenic	705846	781537	75692	+	413211	XR_003305813.1
NC_037649.1	702764	703857	703122;703577;703141;703587;703129;703581	309	135	611	127	424	118	136	152	161	155	92	141	19.7098	7.4188	28.507	7.2704	21.9045	6.54143	7.49253	6.91713	8.24256	7.9716	4.70952	8.023	2.65674	3.92097	3.34858	1.08318	1.03399	0.587002	1.87606	0.0119377	1	+	+	+	-	-	-	Promoter (1-2kb)	705846	781537	75692	+	413211	XR_003305813.1
NC_037649.1	711031	711493	711275;711212;711223	127	72	195	66	130	63	49	80	45	66	23	65	8.13824	3.98215	9.12968	3.8056	6.75174	3.51808	2.7345	3.66201	2.34048	3.4237	1.21536	3.729	2.04368	2.39901	1.91915	0.746721	0.683611	0.325921	1.85694	0.00144381	1	+	+	+	-	-	-	Intron (XR_003305813.1/413211, intron 1 of 3)	705856	771792	65937	+	413211	NM_001113285.1
NC_037651.1	2852089	2852528	2852392;2852266;2852302	105	75	119	66	100	69	79	87	85	81	56	66	6.73948	4.1458	5.5896	3.8056	5.20554	3.8479	4.3752	3.97848	4.37568	4.1902	2.88648	3.7855	1.62562	1.46878	1.35283	1.09972	1.04427	0.76251	0.613627	0.0197117	1	+	+	+	-	-	-	Intron (XM_006559281.3/413213, intron 2 of 3)	2820839	2835644	14806	-	413213	XM_396662.5
NC_037647.1	699529	699879	699762;699712;699715	108	54	97	45	130	54	71	64	75	65	46	35	6.93022	3.00025	4.56484	2.6128	6.75174	3.02335	3.93768	2.93865	3.86688	3.3726	2.38008	2.034	2.30988	1.74711	2.2332	1.33996	1.14656	1.17015	0.782573	0.0276059	1	+	+	+	-	-	-	Intron (XM_006557264.3/413242, intron 1 of 11)	527331	704313	176983	-	413242	XM_006557264.3
NC_037647.1	667197	667943	667617;667520;667678	221	103	296	99	637	83	97	95	58	105	61	85	14.1148	5.6732	13.8343	5.68	32.8825	4.61748	5.35962	4.34016	3.00192	5.4166	3.13968	4.859	2.48798	2.43562	7.12131	1.23489	0.554207	0.646158	2.30628	0.173112	1	+	+	+	-	-	-	Intron (XM_006557264.3/413242, intron 1 of 11)	527331	704313	176983	-	413242	XM_006557264.3
NC_037644.1	1679589	1680090	1679845;1679866;1679934	120	84	191	70	142	71	97	92	101	100	85	68	7.69318	4.63675	8.94336	4.0328	7.37022	3.95784	5.35962	4.20453	5.18976	5.1611	4.35504	3.8985	1.65918	2.21766	1.86218	1.27473	1.00555	1.11711	0.756378	0.0250869	1	+	+	+	-	-	-	Intron (XM_026441717.1/413248, intron 1 of 11)	1683328	1691090	7763	+	413248	XM_026441720.1
NC_037638.1	16734031	16734819	16734526;16734378;16734651	175	133	207	83	252	118	98	150	51	99	50	95	11.1901	7.3097	9.68864	4.7712	13.0396	6.54143	5.41431	6.82671	2.64576	5.11	2.58264	5.424	1.53086	2.03065	1.99339	0.793107	0.517761	0.47615	1.6362	0.00494966	1	+	+	+	-	-	-	Promoter (<=1kb)	16735551	16756342	20792	+	413558	XM_396999.7
NC_037638.1	16735164	16736514	16735688;16736270;16735476;16735625	343	207	646	110	372	172	114	193	94	172	82	151	21.8715	11.3464	30.1373	6.3048	19.2244	9.50981	6.28935	8.77074	4.8336	8.8403	4.20312	8.588	1.92762	4.78006	2.02153	0.717083	0.546769	0.489418	2.3158	0.130099	1	+	+	+	-	-	-	Promoter (<=1kb)	16735551	16756342	20792	+	413558	XM_396999.7
NC_037638.1	16737708	16738933	16738151;16738054;16738122	353	194	529	154	291	154	107	191	80	163	73	167	22.5073	10.6372	24.6874	8.804	15.0497	8.52035	5.90652	8.68032	4.12128	8.3804	3.74736	9.492	2.1159	2.80411	1.76632	0.68045	0.491776	0.394791	2.0932	0.0238505	1	+	+	+	-	-	-	Promoter (2-3kb)	16735579	16756342	20764	+	413558	XM_006571014.3
NC_037638.1	16538148	16538575	16538389;16538362;16538340	186	55	208	64	161	70	79	72	58	71	58	70	11.8895	3.0548	9.73522	3.692	8.34948	3.90287	4.3752	3.30033	3.00192	3.6792	2.98776	4.0115	3.89207	2.63684	2.13932	1.32569	0.815917	0.744799	1.58647	0.0532453	1	+	+	+	-	-	-	Intron (XM_397003.7/413562, intron 1 of 24)	16532591	16656619	124029	+	413562	XM_397003.7
NC_037645.1	9333363	9333731	9333546;9333526;9333554	76	36	129	31	89	42	68	55	75	62	70	33	4.89566	2.01835	6.0554	1.8176	4.6386	2.36371	3.77361	2.53176	3.86688	3.2193	3.59544	1.921	2.42558	3.33154	1.96242	1.49051	1.20116	1.87165	0.758432	0.103206	1	+	+	+	-	-	-	Distal Intergenic	9161606	9330054	168449	-	413568	XM_016913572.2
NC_037650.1	7236688	7237217	7236908;7237075;7236978	165	87	136	69	220	80	106	101	68	104	64	96	10.5543	4.8004	6.38146	3.976	11.3903	4.45257	5.85183	4.61142	3.51072	5.3655	3.2916	5.4805	2.19863	1.60499	2.55814	1.26899	0.654314	0.600602	1.33377	0.0243532	1	+	+	+	-	-	-	Distal Intergenic	7252933	7262789	9857	-	413596	XM_016915853.2
NC_037650.1	7206927	7208319	7207306;7207924;7207330;7207307;7208061;7207924	282	242	714	127	482	209	197	219	140	187	109	178	17.9931	13.2557	33.3047	7.2704	24.8938	11.5437	10.8286	9.9462	7.17408	9.6068	5.5704	10.1135	1.35739	4.58086	2.15648	1.08872	0.746771	0.550789	1.76222	0.185808	1	+	+	+	-	-	-	Distal Intergenic	7252933	7262789	9857	-	413596	XM_016915853.2
NC_037651.1	2466789	2467432	2466966;2467295;2466997;2467051	124	49	172	63	181	60	75	61	70	67	66	48	7.9475	2.7275	8.05834	3.6352	9.38028	3.35317	4.15644	2.80302	3.61248	3.4748	3.39288	2.7685	2.91384	2.21675	2.79744	1.48284	1.03962	1.22553	1.08084	0.00920121	1	+	+	+	-	-	-	Promoter (1-2kb)	2460838	2465574	4737	-	413623	XM_397065.6
NC_037652.1	7582496	7582945	7582711;7582732;7582719	125	52	196	50	113	68	68	75	75	84	62	55	8.01108	2.89115	9.17626	2.8968	5.87556	3.79293	3.77361	3.43596	3.86688	4.3435	3.19032	3.164	2.7709	3.16772	1.54908	1.09827	0.890268	1.00832	1.32107	0.0893917	1	+	+	+	-	-	-	3' UTR	7580555	7588537	7983	-	413742	XM_397181.7
NC_037643.1	16868421	16868828	16868626;16868631;16868632	148	54	200	68	161	47	98	60	77	65	73	53	9.47342	3.00025	9.36258	3.9192	8.34948	2.63856	5.41431	2.75781	3.96864	3.3726	3.74736	3.051	3.15754	2.3889	3.16441	1.96326	1.17673	1.22824	0.995764	0.016096	1	+	+	+	-	-	-	Intron (XM_026441213.1/413783, intron 2 of 8)	16862266	16873295	11030	-	413783	XM_026441213.1
NC_037638.1	21175130	21175748	21175475;21175536;21175440	204	93	220	83	203	69	109	79	80	91	42	102	13.0339	5.1277	10.2942	4.7712	10.5142	3.8479	6.0159	3.6168	4.12128	4.7012	2.17752	5.8195	2.54186	2.15757	2.73245	1.66332	0.876644	0.374176	1.35066	0.0399785	1	+	+	+	-	-	-	Intron (XM_026446499.1/413968, intron 37 of 56)	21060019	21469905	409887	+	413968	XM_026446496.1
NC_037638.1	21219498	21220262	21219912;21219866;21219965	198	120	186	93	170	88	110	130	85	138	64	152	12.6524	6.60055	8.71046	5.3392	8.81334	4.89233	6.07059	5.92251	4.37568	7.1029	3.2916	8.6445	1.91687	1.63142	1.80146	1.025	0.616041	0.380774	1.40382	0.0155966	1	+	+	+	-	-	-	Intron (XM_026446499.1/413968, intron 40 of 56)	21060019	21469905	409887	+	413968	XM_026446496.1
NC_037644.1	5718316	5718753	5718479;5718526;5718500	174	91	151	61	104	58	51	83	42	84	47	101	11.1265	5.0186	7.08016	3.5216	5.4117	3.24323	2.84388	3.79764	2.18784	4.3435	2.43072	5.763	2.21705	2.0105	1.66861	0.748855	0.503704	0.42178	1.81618	0.00342756	1	+	+	+	-	-	-	Intron (XM_006571995.3/100577472, intron 2 of 6)	5690624	5694952	4329	+	414028	XM_006571996.3
NC_037638.1	25195256	25196259	25195523;25195501;25195556;25195724;25196089	207	183	267	112	156	137	138	175	98	148	56	148	13.2246	10.0372	12.4834	6.4184	8.09178	7.58586	7.60191	7.95696	5.03712	7.6139	2.88648	8.4185	1.31756	1.94494	1.06669	0.955379	0.661569	0.342873	1.14338	0.0750913	1	+	+	+	-	-	-	Intron (XM_001119904.4/724148, intron 1 of 2)	25171162	25173330	2169	+	503862	NM_001012963.1
NC_037641.1	9529207	9529797	9529426;9529630;9529513	160	96	137	60	192	84	111	96	71	99	77	80	10.2364	5.29135	6.42804	3.4648	9.94722	4.67245	6.12528	4.38537	3.66336	5.11	3.94992	4.5765	1.93455	1.85524	2.12891	1.39675	0.7169	0.863088	0.991548	0.0287519	1	+	+	+	-	-	-	Distal Intergenic	9333421	9513878	180458	-	550811	XM_006565433.3
NC_037640.1	6348695	6349604	6348864;6349420;6348898;6349373;6349498	220	116	203	107	260	120	149	130	148	146	118	144	14.0512	6.38235	9.50232	6.1344	13.4519	6.65137	8.2035	5.92251	7.58112	7.5117	6.02616	8.1925	2.20157	1.54902	2.02243	1.38514	1.00924	0.73557	0.883186	0.0313314	1	+	+	+	-	-	-	Promoter (<=1kb)	6325723	6349438	23716	-	550964	XM_016911270.2
NC_037639.1	5299121	5299565	5299247;5299369;5299366	114	86	134	67	137	91	69	86	67	82	61	74	7.3117	4.74585	6.2883	3.8624	7.11252	5.05724	3.8283	3.93327	3.45984	4.2413	3.13968	4.2375	1.54065	1.62808	1.4064	0.973312	0.81575	0.740927	0.854683	0.00195052	1	+	+	+	-	-	-	Distal Intergenic	5317805	5320083	2279	+	551009	XM_623404.6
NC_037638.1	18459267	18460030	18459490;18459637;18459679	146	99	307	115	221	90	92	105	97	130	87	121	9.34626	5.455	14.3466	6.5888	11.4419	5.00227	5.08617	4.79226	4.98624	6.6941	4.45632	6.893	1.71334	2.17742	2.28734	1.06133	0.744871	0.646499	1.33279	0.00615506	1	+	+	+	-	-	-	Intron (XM_623468.6/551069, intron 1 of 17)	18453500	18534678	81179	+	551069	XM_006571113.3
NC_037639.1	7164467	7164871	7164660;7164642;7164663	121	73	124	59	139	74	97	79	47	67	43	53	7.75676	4.0367	5.8225	3.408	7.2156	4.12275	5.35962	3.6168	2.44224	3.4748	2.22816	3.051	1.92156	1.70848	1.75019	1.48187	0.702843	0.730305	0.884164	0.0763204	1	+	+	+	-	-	-	Intron (XM_026439281.1/551123, intron 2 of 16)	7059638	7794461	734824	+	551123	XM_026439276.1
NC_037639.1	7166323	7166895	7166490;7166640;7166549	162	113	145	86	197	82	141	115	83	97	39	85	10.3635	6.2187	6.80068	4.9416	10.2049	4.56251	7.76598	5.24436	4.27392	5.0078	2.0256	4.859	1.66651	1.37621	2.23669	1.48083	0.853453	0.416876	0.940338	0.104956	1	+	+	+	-	-	-	Intron (XM_026439281.1/551123, intron 2 of 16)	7059638	7794461	734824	+	551123	XM_026439276.1
NC_037639.1	7167353	7167706	7167520;7167630;7167530	105	70	119	49	116	44	79	71	41	64	43	58	6.73948	3.87305	5.5896	2.84	6.03018	2.47365	4.3752	3.25512	2.13696	3.3215	2.22816	3.3335	1.7401	1.96817	2.43777	1.3441	0.643372	0.668415	1.21046	0.0199166	1	+	+	+	-	-	-	Intron (XM_026439281.1/551123, intron 2 of 16)	7059638	7794461	734824	+	551123	XM_026439276.1
NC_037639.1	7188752	7189243	7188963;7189056;7188937	140	83	120	56	152	71	106	118	64	65	53	71	8.96478	4.5822	5.63618	3.2376	7.88562	3.95784	5.85183	5.37999	3.3072	3.3726	2.73456	4.068	1.95644	1.74085	1.9924	1.0877	0.980608	0.672212	1.0539	0.00469544	1	+	+	+	-	-	-	Intron (XM_026439281.1/551123, intron 2 of 16)	7059638	7794461	734824	+	551123	XM_026439276.1
NC_037640.1	6160983	6161819	6161121;6161130;6161646;6161358	211	120	199	101	216	141	161	147	97	135	100	120	13.479	6.60055	9.316	5.7936	11.1842	7.80574	8.85978	6.69108	4.98624	6.9496	5.11464	6.8365	2.0421	1.60798	1.43282	1.32412	0.717486	0.748137	0.865521	0.0465988	1	+	+	+	-	-	-	Exon (XM_026439658.1/551170, exon 4 of 177)	6140764	6248769	108006	+	551170	XM_026439665.1
NC_037640.1	6169053	6171534	6169251;6170156;6170456;6170811;6169513;6170102;6170053;6171003	674	307	450	320	688	351	365	402	270	327	245	347	42.9165	16.8014	21.0076	18.2328	35.5111	19.3494	20.0165	18.2196	13.7885	16.7608	12.4574	19.662	2.55434	1.15219	1.83526	1.09862	0.822664	0.633577	1.1171	0.121819	1	+	+	+	-	-	-	Exon (XM_026439658.1/551170, exon 20 of 177)	6140764	6248769	108006	+	551170	XM_026439665.1
NC_037643.1	12943392	12943808	12943578;12943584;12943604	122	62	134	47	147	71	80	77	73	81	63	74	7.82034	3.43665	6.2883	2.7264	7.62792	3.95784	4.42989	3.52638	3.76512	4.1902	3.24096	4.2375	2.27557	2.30645	1.92729	1.25621	0.898554	0.764828	1.15674	0.00367277	1	+	+	+	-	-	-	Promoter (<=1kb)	12944081	12952473	8393	+	551188	XM_623582.6
NC_037638.1	16562492	16563218	16562705;16562719;16562897	224	113	212	96	238	129	163	123	134	112	103	100	14.3055	6.2187	9.92154	5.5096	12.3181	7.1461	8.96916	5.60604	6.8688	5.7743	5.26656	5.7065	2.3004	1.80077	1.72375	1.59991	1.18955	0.922905	0.649902	0.0583367	1	+	+	+	-	-	-	Intron (XM_397003.7/413562, intron 1 of 24)	16591550	16592897	1348	-	551206	XM_016913759.2
NC_037650.1	5716053	5716574	5716224;5716194;5716196	94	54	118	54	120	63	53	62	52	75	29	63	6.0401	3.00025	5.54302	3.124	6.23634	3.51808	2.95326	2.84823	2.69664	3.8836	1.5192	3.616	2.0132	1.77433	1.77265	1.03688	0.694366	0.420133	1.36987	0.0125784	1	+	+	+	-	-	-	Promoter (2-3kb)	5711443	5719422	7980	-	551232	XM_026444653.1
NC_037644.1	8936960	8937469	8937189;8937232;8937249	118	77	200	53	182	75	95	85	55	73	92	76	7.56602	4.2549	9.36258	3.0672	9.43182	4.17772	5.25024	3.88806	2.84928	3.7814	4.70952	4.3505	1.77819	3.05248	2.25765	1.35035	0.753499	1.08252	1.15353	0.0546457	1	+	+	+	-	-	-	Promoter (2-3kb)	8940440	9058966	118527	+	551259	XM_026441833.1
NC_037644.1	8897804	8898643	8898212;8898215;8898193	346	90	533	104	281	99	111	152	68	104	79	92	22.0623	4.96405	24.8737	5.964	14.5343	5.497	6.12528	6.91713	3.51072	5.3655	4.0512	5.2545	4.44442	4.17064	2.64404	0.885523	0.654314	0.770996	2.28461	0.0319689	1	+	+	+	-	-	-	Promoter (2-3kb)	8901572	9058966	157395	+	551259	XM_026441829.1
NC_037644.1	8919961	8920381	8920165;8920099;8920198	162	81	149	67	141	77	103	81	56	74	49	56	10.3635	4.4731	6.987	3.8624	7.31868	4.28766	5.68776	3.70722	2.90016	3.8325	2.532	3.2205	2.31685	1.80898	1.70692	1.53424	0.756728	0.786213	0.922566	0.0486437	1	+	+	+	-	-	-	Exon (XR_003305045.1/551259, exon 49 of 102)	8906209	9058966	152758	+	551259	XM_026441831.1
NC_037644.1	8960930	8961437	8961175;8961152;8961178	154	70	146	77	159	58	112	98	58	63	51	84	9.8549	3.87305	6.84726	4.4304	8.2464	3.24323	6.17997	4.47579	3.00192	3.2704	2.63328	4.8025	2.54448	1.54552	2.54265	1.38076	0.917906	0.548314	1.22015	0.042094	1	+	+	+	-	-	-	Exon (XR_003305045.1/551259, exon 68 of 102)	8940440	9058966	118527	+	551259	XM_026441833.1
NC_037648.1	13020797	13021177	13020980;13021020;13021022	114	75	124	48	127	52	86	88	96	80	88	57	7.3117	4.1458	5.8225	2.7832	6.59712	2.91341	4.75803	4.02369	4.93536	4.1391	4.50696	3.277	1.76364	2.09202	2.2644	1.1825	1.19238	1.37533	0.706573	0.0201432	1	+	+	+	-	-	-	Distal Intergenic	13026660	13038681	12022	+	551323	XM_006566395.2
NC_037643.1	17258518	17259299	17258674;17259059;17258664;17259097;17258781;17259107	181	104	203	75	176	77	155	115	101	111	75	110	11.5716	5.72775	9.50232	4.3168	9.12258	4.28766	8.53164	5.24436	5.18976	5.7232	3.84864	6.2715	2.02027	2.20124	2.12764	1.62682	0.906793	0.613671	1.01245	0.0671013	1	+	+	+	-	-	-	Distal Intergenic	17106794	17214962	108169	-	551460	XM_026441569.1
NC_037643.1	17111847	17112427	17111956;17112077;17111997	151	95	137	66	210	86	130	117	93	113	65	72	9.66416	5.2368	6.42804	3.8056	10.8749	4.78239	7.16439	5.33478	4.78272	5.8254	3.34224	4.1245	1.84543	1.6891	2.27395	1.34296	0.821011	0.810338	0.965606	0.0189309	1	+	+	+	-	-	-	Exon (XM_016912736.2/551460, exon 4 of 7)	17106794	17135356	28563	-	551460	XM_016912736.2
NC_037638.1	16862994	16863417	16863189;16863167;16863242	121	84	146	58	151	80	99	78	69	63	69	73	7.75676	4.63675	6.84726	3.3512	7.83408	4.45257	5.469	3.57159	3.5616	3.2704	3.5448	4.181	1.67289	2.04323	1.75945	1.53125	1.08904	0.847835	0.658851	0.0582477	1	+	+	+	-	-	-	Intron (XM_006571020.3/551558, intron 1 of 16)	16785442	16847292	61851	-	551558	XM_006571023.3
NC_037638.1	16905065	16905653	16905195;16905548;16905479;16905498	134	98	158	90	198	99	143	96	103	135	89	84	8.5833	5.40045	7.40622	5.1688	10.2565	5.497	7.87536	4.38537	5.29152	6.9496	4.5576	4.8025	1.58937	1.43287	1.86584	1.79583	0.761414	0.949006	0.479339	0.283248	1	+	+	+	-	-	-	Distal Intergenic	16785442	16899856	114415	-	551558	XM_006571022.3
NC_037652.1	8311379	8312511	8311751;8312171;8311713;8312087;8312373;8311803;8312171	301	178	293	129	312	183	169	173	124	194	124	126	19.2012	9.76445	13.6945	7.384	16.132	10.1145	9.2973	7.86654	6.36	9.9645	6.33	7.1755	1.96644	1.85462	1.59494	1.18188	0.638266	0.882168	1.00303	0.012022	1	+	+	+	-	-	-	Exon (XM_003250254.4/409680, exon 11 of 16)	8302408	8305934	3527	-	551593	XM_006563646.3
NC_037638.1	26653539	26654135	26653873;26653844;26653826	219	92	249	89	233	72	122	119	64	72	91	97	13.9876	5.07315	11.645	5.112	12.0604	4.01281	6.72687	5.4252	3.3072	3.7303	4.65888	5.537	2.75718	2.27797	3.00547	1.23993	0.886577	0.841409	1.43786	0.00500905	1	+	+	+	-	-	-	Promoter (<=1kb)	26653375	26815176	161802	+	551623	XR_003306263.1
NC_037638.1	26461263	26462460	26461844;26461896;26461878	264	187	451	133	317	158	156	190	127	166	133	175	16.8487	10.2554	21.0542	7.6112	16.3897	8.74023	8.58633	8.63511	6.51264	8.5337	6.78576	9.944	1.64291	2.76621	1.8752	0.994351	0.763167	0.682397	1.36493	0.0558393	1	+	+	+	-	-	-	Intron (XM_026445775.1/551623, intron 2 of 10)	26349896	26815254	465359	+	551623	XM_026445773.1
NC_037643.1	14483880	14484225	14484029;14484080;14484068	91	40	107	38	77	24	62	61	72	39	35	41	5.84936	2.23655	5.03064	2.2152	4.02012	1.37425	3.44547	2.80302	3.71424	2.044	1.82304	2.373	2.61535	2.27096	2.92532	1.2292	1.81714	0.768243	1.0341	0.0278628	1	+	+	+	-	-	-	Exon (XM_006570518.3/408874, exon 18 of 31)	14504599	14508301	3703	+	551631	XM_624022.6
NC_037642.1	10724325	10726443	10724902;10725182;10725885;10724943;10725173;10724916;10725177;10725912;10726232;10725909	733	242	1078	218	570	228	261	292	167	255	158	278	46.6677	13.2557	50.2598	12.4392	29.4293	12.5881	14.3288	13.2465	8.54784	13.0816	8.05176	15.7635	3.52058	4.04044	2.33787	1.0817	0.653425	0.510785	2.13996	0.0268137	1	+	+	+	-	-	-	Promoter (1-2kb)	10722910	10727264	4355	+	551758	XM_006567746.3
NC_037649.1	3831420	3831775	3831585;3831610;3831628	86	52	126	42	165	55	55	75	41	67	59	43	5.53146	2.89115	5.91566	2.4424	8.55564	3.07832	3.06264	3.43596	2.13696	3.4748	3.0384	2.486	1.91324	2.42207	2.77932	0.891349	0.614988	1.2222	1.38266	0.0116135	1	+	+	+	-	-	-	Exon (XR_001705212.2/100578102, exon 5 of 19)	3844792	3847257	2466	+	551759	XM_006560792.3
NC_037640.1	5511456	5511830	5511604;5511618;5511630	102	105	130	45	109	60	107	91	58	73	68	78	6.54874	5.7823	6.10198	2.6128	5.6694	3.35317	5.90652	4.15932	3.00192	3.7814	3.49416	4.4635	1.13255	2.33542	1.69076	1.42007	0.793865	0.78283	0.78361	0.166005	1	+	+	+	-	-	-	Intron (XM_026439340.1/551828, intron 1 of 15)	5500738	5686185	185448	+	551828	NM_001242574.1
NC_037649.1	7011899	7012419	7012236;7012182;7012189	154	78	169	63	187	75	73	84	41	61	28	62	9.8549	4.30945	7.9186	3.6352	9.68952	4.17772	4.04706	3.84285	2.13696	3.1682	1.46856	3.5595	2.28681	2.17831	2.31933	1.05314	0.674503	0.412575	1.66448	0.0109923	1	+	+	+	-	-	-	Promoter (<=1kb)	7005427	7011763	6337	-	551869	XM_016915547.2
NC_037649.1	7005995	7010453	7006488;7008101;7009256;7010085;7006472;7006488;7008118;7009288;7009270;7010099;7010115	1188	515	3285	366	1805	444	333	601	407	463	381	405	75.5966	28.1478	153.062	20.8456	93.0812	24.4616	18.2665	27.2164	20.759	23.7104	19.3445	22.939	2.6857	7.34265	3.8052	0.671158	0.875523	0.843302	2.5331	0.112603	1	+	+	+	-	-	-	Promoter (1-2kb)	7005427	7011763	6337	-	551869	XM_016915547.2
NC_037644.1	341741	342979	342147;342648;341948;341933;342599	244	179	425	133	241	133	145	174	143	192	107	122	15.5771	9.819	19.8431	7.6112	12.4727	7.36598	7.98474	7.91175	7.32672	9.8623	5.46912	6.9495	1.58642	2.60709	1.69328	1.00923	0.742902	0.78698	1.21316	0.0669432	1	+	+	+	-	-	-	Exon (XM_006557675.3/552005, exon 5 of 8)	329969	353793	23825	+	552005	XM_006557674.3
NC_037644.1	343249	343953	343610;343612;343622	256	100	409	80	176	77	60	77	71	99	67	61	16.3401	5.50955	19.0978	4.6008	9.12258	4.28766	3.33609	3.52638	3.66336	5.11	3.44352	3.503	2.96578	4.15097	2.12764	0.946038	0.7169	0.98302	1.80479	0.0617181	1	+	+	+	-	-	-	Intron (XM_006557675.3/552005, intron 5 of 7)	329969	353793	23825	+	552005	XM_006557674.3
NC_037644.1	344698	345328	345066;345002;345047	169	93	256	66	230	77	81	91	125	106	62	80	10.8086	5.1277	11.9711	3.8056	11.9057	4.28766	4.48458	4.15932	6.41088	5.4677	3.19032	4.5765	2.10788	3.14565	2.77674	1.0782	1.1725	0.697109	1.44581	0.016811	1	+	+	+	-	-	-	Intron (XM_006557675.3/552005, intron 5 of 7)	329969	353793	23825	+	552005	XM_006557674.3
NC_037642.1	7707488	7707957	7707650;7707748;7707740	128	59	153	58	152	70	103	98	60	78	72	86	8.20182	3.273	7.17332	3.3512	7.88562	3.90287	5.68776	4.47579	3.10368	4.0369	3.69672	4.9155	2.5059	2.14052	2.02047	1.27078	0.768828	0.752054	1.25589	0.00482969	1	+	+	+	-	-	-	Intron (XM_016912223.2/552079, intron 4 of 12)	7660753	8093347	432595	+	552079	XM_006564734.3
NC_037642.1	7777393	7777766	7777533;7777600;7777599	98	55	105	46	124	54	91	77	61	60	42	28	6.29442	3.0548	4.93748	2.6696	6.4425	3.02335	5.03148	3.52638	3.15456	3.1171	2.17752	1.6385	2.0605	1.84952	2.13091	1.42681	1.01202	1.32897	0.681049	0.0103684	1	+	+	+	-	-	-	Intron (XM_016912223.2/552079, intron 6 of 12)	7660753	8093347	432595	+	552079	XM_006564734.3
NC_037642.1	7820753	7821494	7820970;7821272;7820934;7821319;7820913;7821077	222	118	197	118	274	88	170	171	114	119	79	98	14.1783	6.49145	9.22284	6.7592	14.1735	4.89233	9.35199	7.77612	5.8512	6.132	4.0512	5.5935	2.18415	1.36449	2.89709	1.20266	0.954207	0.724269	1.16171	0.104517	1	+	+	+	-	-	-	Intron (XM_016912223.2/552079, intron 7 of 12)	7660753	8093347	432595	+	552079	XM_006564734.3
NC_037642.1	7822236	7822639	7822422;7822402;7822388	111	71	140	53	138	59	97	98	47	71	42	72	7.12096	3.9276	6.56778	3.0672	7.16406	3.2982	5.35962	4.47579	2.44224	3.6792	2.17752	4.1245	1.81306	2.14129	2.17211	1.19747	0.663796	0.527948	1.35852	0.0114861	1	+	+	+	-	-	-	Intron (XM_016912223.2/552079, intron 7 of 12)	7660753	8093347	432595	+	552079	XM_006564734.3
NC_037653.1	2879008	2879659	2879143;2879576;2879491	156	103	137	63	163	79	127	123	104	107	81	86	9.98206	5.6732	6.42804	3.6352	8.45256	4.3976	7.00032	5.60604	5.3424	5.5188	4.15248	4.9155	1.75951	1.76828	1.92208	1.24871	0.968037	0.844773	0.831975	0.0113457	1	+	+	+	-	-	-	Promoter (<=1kb)	2856369	2879070	22702	-	552100	XM_026445928.1
NC_037638.1	22113695	22114806	22114155;22114142;22114086;22114367	244	169	316	116	473	140	178	165	175	149	107	171	15.5771	9.2735	14.7659	6.6456	24.43	7.75077	9.78951	7.50486	8.95488	7.665	5.46912	9.718	1.67974	2.22191	3.15194	1.30442	1.16828	0.562782	1.21643	0.0694889	1	+	+	+	-	-	-	Promoter (1-2kb)	21819932	22111800	291869	-	552142	XM_006571349.3
NC_037638.1	22093315	22094352	22093485;22093621;22093832;22094066;22093917;22094220;22094176	293	149	267	123	268	150	226	196	160	170	132	135	18.6925	8.1825	12.4834	7.0432	13.8643	8.30047	12.4146	8.90637	8.19168	8.7381	6.73512	7.684	2.28445	1.7724	1.6703	1.3939	0.937467	0.876512	0.836199	0.0294977	1	+	+	+	-	-	-	Intron (XM_006571350.3/552142, intron 1 of 15)	21822505	22111797	289293	-	552142	XM_026443286.1
NC_037647.1	9311317	9311946	9311553;9311649;9311691	213	141	201	93	320	97	153	151	129	108	78	102	13.6061	7.7461	9.40916	5.3392	16.5443	5.38706	8.42226	6.87192	6.6144	5.5699	4.00056	5.8195	1.75651	1.76228	3.07112	1.22561	1.18753	0.687441	1.08772	0.102377	1	+	+	+	-	-	-	Intron (XM_624652.6/552276, intron 1 of 15)	9293211	9334291	41081	+	552276	XM_006566025.3
NC_037640.1	6758442	6758784	6758585;6758585;6758645	114	81	111	44	103	71	68	83	44	54	43	81	7.3117	4.4731	5.21696	2.556	5.36016	3.95784	3.77361	3.79764	2.2896	2.8105	2.22816	4.633	1.63459	2.04106	1.35431	0.993672	0.814659	0.480932	1.13567	0.0245017	1	+	+	+	-	-	-	Intron (XM_006560870.3/552278, intron 2 of 9)	6736344	6865750	129407	+	552278	XM_016911328.2
NC_037640.1	1837395	1837883	1837603;1837657;1837625	148	88	129	61	109	55	120	108	75	86	64	60	9.47342	4.85495	6.0554	3.5216	5.6694	3.07832	6.61749	4.92789	3.86688	4.4457	3.2916	3.4465	1.95129	1.7195	1.84172	1.34286	0.869802	0.955056	0.799264	0.0191476	1	+	+	+	-	-	-	Intron (XM_006557258.3/552297, intron 1 of 5)	1770671	1821687	51017	-	552297	XM_006557257.3
NC_037653.1	729901	730270	730033;730080;730101	107	58	86	38	106	35	79	51	60	48	80	42	6.86664	3.21845	4.05246	2.2152	5.51478	1.97892	4.3752	2.35092	3.10368	2.5039	4.10184	2.4295	2.13352	1.82939	2.78676	1.86106	1.23954	1.68835	0.49511	0.13629	1	+	+	+	-	-	-	Exon (NM_001270821.1/552350, exon 3 of 4)	726163	732625	6463	+	552350	NM_001270821.1
NC_037638.1	6931106	6931588	6931300;6931308;6931334	130	94	159	79	186	78	99	105	88	62	72	85	8.32898	5.18225	7.4528	4.544	9.63798	4.34263	5.469	4.79226	4.52832	3.2193	3.69672	4.859	1.60721	1.64014	2.21939	1.14122	1.40662	0.760799	0.724447	0.0582084	1	+	+	+	-	-	-	Promoter (<=1kb)	6924396	6931775	7380	-	552395	XM_026445535.1
NC_037649.1	9901124	9902155	9901394;9901437;9901460;9901897;9901916;9902003	249	156	292	106	298	130	199	205	173	146	118	155	15.895	8.56435	13.6479	6.0776	15.4105	7.20107	10.938	9.31326	8.85312	7.5117	6.02616	8.814	1.85595	2.24561	2.14003	1.17445	1.17858	0.683703	1.03939	0.00808062	1	+	+	+	-	-	-	Intron (XM_026444405.1/552397, intron 1 of 4)	9706257	9931963	225707	-	552397	XM_624769.5
NC_037649.1	9898621	9899161	9898814;9898875;9898816	177	76	123	60	184	83	122	95	80	79	70	89	11.3172	4.20035	5.77592	3.4648	9.5349	4.61748	6.72687	4.34016	4.12128	4.088	3.59544	5.085	2.69435	1.66703	2.06496	1.54991	1.00814	0.707068	0.976859	0.0551563	1	+	+	+	-	-	-	Intron (XM_026444405.1/552397, intron 1 of 4)	9706257	9931963	225707	-	552397	XM_624769.5
NC_037646.1	11360522	11361047	11360701;11360712;11360745	108	87	147	56	192	101	89	95	64	106	44	71	6.93022	4.8004	6.89384	3.2376	9.94722	5.60694	4.9221	4.34016	3.3072	5.4677	2.2788	4.068	1.44368	2.12931	1.77409	1.13408	0.604861	0.560177	1.21767	0.0200226	1	+	+	+	-	-	-	Promoter (1-2kb)	11359060	11366444	7385	+	552546	XM_016914038.2
NC_037648.1	12627084	12627460	12627258;12627256;12627288	117	64	133	43	121	59	84	68	76	68	71	49	7.50244	3.54575	6.24172	2.4992	6.28788	3.2982	4.64865	3.11949	3.91776	3.5259	3.64608	2.825	2.1159	2.49749	1.90646	1.4902	1.11114	1.29065	0.744332	0.0183722	1	+	+	+	-	-	-	Intron (XM_006566373.3/552577, intron 2 of 8)	12614275	12649707	35433	+	552577	XM_026443631.1
NC_037647.1	3681264	3681961	3681482;3681678;3681466;3681875;3681603	170	117	147	81	185	79	117	140	64	91	65	76	10.8722	6.4369	6.89384	4.6576	9.58644	4.3976	6.45342	6.37461	3.3072	4.7012	3.34224	4.3505	1.68904	1.48013	2.17993	1.01236	0.70348	0.768243	1.10658	0.028508	1	+	+	+	-	-	-	Intron (XM_006560770.3/724150, intron 1 of 2)	3654801	3694661	39861	-	724150	XM_006560770.3
NC_037643.1	10257978	10258707	10258128;10258485;10258226;10258157;10258469	163	109	198	79	208	101	112	143	77	141	52	107	10.4271	6.0005	9.26942	4.544	10.7719	5.60694	6.17997	6.51024	3.96864	7.2562	2.68392	6.102	1.73771	2.03993	1.92117	0.949269	0.546931	0.439843	1.55755	0.00493784	1	+	+	+	-	-	-	Promoter (1-2kb)	10200737	10256162	55426	-	724220	XM_003251160.4
NC_037639.1	3887508	3888075	3887808;3887798;3887863	153	79	298	66	204	77	60	73	65	72	68	69	9.79132	4.364	13.9274	3.8056	10.5657	4.28766	3.33609	3.34554	3.35808	3.7303	3.49416	3.955	2.24366	3.65971	2.46421	0.997175	0.900217	0.883479	1.58927	0.0506783	1	+	+	+	-	-	-	Promoter (<=1kb)	3887868	3909867	22000	+	724275	XM_026439063.1
NC_037639.1	3904800	3905419	3905080;3905078;3905096	207	78	296	67	198	77	82	101	38	85	68	70	13.2246	4.30945	13.8343	3.8624	10.2565	4.28766	4.53927	4.61142	1.98432	4.3946	3.49416	4.0115	3.06874	3.58179	2.3921	0.984354	0.451536	0.871036	1.97077	0.0112915	1	+	+	+	-	-	-	Promoter (<=1kb)	3904820	3909867	5048	+	724275	XM_006559141.3
NC_037649.1	5836112	5836500	5836215;5836313;5836319	98	74	120	64	113	63	98	77	51	73	31	96	6.29442	4.09125	5.63618	3.692	5.87556	3.51808	5.41431	3.52638	2.64576	3.7814	1.62048	5.4805	1.53851	1.52659	1.6701	1.53537	0.699677	0.295681	0.903872	0.179942	1	+	+	+	-	-	-	Intron (XM_026444422.1/724292, intron 1 of 21)	5550354	5819683	269330	-	724292	XM_026444412.1
NC_037646.1	6044285	6045719	6044669;6045235;6045492;6044876;6045294;6044814;6045409	307	191	321	173	521	204	228	219	132	223	163	214	19.5826	10.4736	14.9988	9.8832	26.9039	11.2689	12.524	9.9462	6.76704	11.4464	8.30496	12.1475	1.86971	1.51761	2.38745	1.25917	0.591194	0.683676	1.18832	0.0316533	1	+	+	+	-	-	-	Promoter (<=1kb)	6043644	6046657	3014	+	724315	XM_006561589.3
NC_037640.1	11265821	11266227	11266071;11266034;11266040	128	55	146	43	145	52	73	56	79	74	69	60	8.20182	3.0548	6.84726	2.4992	7.52484	2.91341	4.04706	2.57697	4.0704	3.8325	3.5448	3.4465	2.6849	2.73978	2.58283	1.57047	1.06207	1.02852	1.12909	0.0103946	1	+	+	+	-	-	-	Exon (XM_026439477.1/724344, exon 4 of 15)	11277094	11471418	194325	+	724344	XM_026439480.1
NC_037640.1	11287295	11287975	11287436;11287790;11287539;11287830;11287784	135	90	177	60	147	63	114	119	84	80	53	81	8.64688	4.96405	8.29124	3.4648	7.62792	3.51808	6.28935	5.4252	4.3248	4.1391	2.73456	4.633	1.7419	2.39299	2.16821	1.15928	1.04486	0.590235	1.17353	0.0107933	1	+	+	+	-	-	-	Intron (XM_026439477.1/724344, intron 5 of 14)	11291492	11471418	179927	+	724344	XM_026439481.1
NC_037642.1	2750956	2751367	2751091;2751166;2751130	112	79	127	44	131	47	89	86	47	77	70	66	7.18454	4.364	5.96224	2.556	6.80328	2.63856	4.9221	3.93327	2.44224	3.9858	3.59544	3.7855	1.64632	2.33264	2.57841	1.2514	0.612735	0.949793	1.22053	0.0260866	1	+	+	+	-	-	-	Exon (XM_026440994.1/724385, exon 4 of 10)	2745465	2760725	15261	+	724385	XM_026440996.1
NC_037647.1	8669863	8671379	8669977;8670316;8670857;8671332;8669996;8670750;8670823	329	234	315	168	380	139	261	236	132	183	130	170	20.9814	12.8193	14.7193	9.5992	19.6367	7.6958	14.3288	10.7148	6.76704	9.4024	6.63384	9.6615	1.6367	1.53339	2.55161	1.33729	0.719714	0.686626	1.06036	0.0719661	1	+	+	+	-	-	-	Promoter (2-3kb)	8673400	8686560	13161	+	724417	XM_026443486.1
NC_037647.1	8652688	8653547	8653264;8653074;8653411;8653348	207	138	207	101	249	118	148	176	126	117	107	104	13.2246	7.58245	9.68864	5.7936	12.885	6.54143	8.14881	8.00217	6.46176	6.0298	5.46912	5.9325	1.74411	1.6723	1.96975	1.01833	1.07164	0.921891	0.838605	0.004686	1	+	+	+	-	-	-	Intron (XM_026443476.1/724417, intron 2 of 20)	8649318	8686560	37243	+	724417	XM_026443484.1
NC_037638.1	15575754	15576248	15576100;15575999;15575913	159	96	145	76	140	90	69	93	70	69	57	63	10.1728	5.29135	6.80068	4.3736	7.26714	5.00227	3.8283	4.24974	3.61248	3.577	2.93712	3.616	1.92253	1.55494	1.45277	0.900832	1.00992	0.812257	0.856457	0.0233122	1	+	+	+	-	-	-	Intron (XR_003306016.1/724539, intron 4 of 4)	15542067	15561401	19335	+	724456	NM_001115078.1
NC_037638.1	15601885	15602603	15602073;15602100;15602226	162	124	174	91	210	108	117	107	95	93	51	94	10.3635	6.81875	8.1515	5.2256	10.8749	5.99173	6.45342	4.88268	4.88448	4.8034	2.63328	5.3675	1.51985	1.55992	1.81498	1.3217	1.01688	0.490597	0.790856	0.0906544	1	+	+	+	-	-	-	Intron (XR_003306016.1/724539, intron 4 of 4)	15534940	15611808	76869	-	724539	XR_003306016.1
NC_037638.1	15598643	15599264	15598982;15598966;15599019	195	103	267	93	240	72	121	129	65	81	68	97	12.4617	5.6732	12.4834	5.3392	12.4211	4.01281	6.67218	5.8773	3.35808	4.1902	3.49416	5.537	2.19659	2.33807	3.09536	1.13525	0.801413	0.631057	1.5712	0.012359	1	+	+	+	-	-	-	Intron (XR_003306016.1/724539, intron 4 of 4)	15534940	15611808	76869	-	724539	XR_003306016.1
NC_037638.1	15576974	15577587	15577234;15577214;15577361	226	73	184	75	186	83	88	90	72	81	47	70	14.4327	4.0367	8.6173	4.3168	9.63798	4.61748	4.86741	4.11411	3.71424	4.1902	2.43072	4.0115	3.57537	1.99622	2.08728	1.1831	0.886411	0.605938	1.51735	0.0714147	1	+	+	+	-	-	-	Intron (XR_003306016.1/724539, intron 4 of 4)	15534940	15611808	76869	-	724539	XR_003306016.1
NC_037651.1	8169892	8170684	8170072;8170095;8170126;8170548	183	110	224	109	216	113	159	131	137	124	81	94	11.6987	6.05505	10.4805	6.248	11.1842	6.26658	8.7504	5.96772	7.02144	6.3875	4.15248	5.3675	1.93206	1.67742	1.78474	1.46629	1.09925	0.773634	0.691923	0.0617343	1	+	+	+	-	-	-	Intron (XM_016916072.2/724594, intron 1 of 3)	8149838	8184090	34253	+	724594	XM_016916072.2
NC_037650.1	1542217	1542542	1542383;1542381;1542403	76	30	121	39	79	29	59	37	39	35	56	29	4.89566	1.69105	5.68276	2.272	4.1232	1.6491	3.2814	1.71798	2.0352	1.8396	2.88648	1.695	2.89504	2.50121	2.50027	1.91003	1.10633	1.70294	0.742646	0.0291103	1	+	+	+	-	-	-	Distal Intergenic	1492946	1531475	38530	-	724619	XM_026444716.1
NC_037640.1	6607666	6608070	6607868;6607928;6607909;6608052	139	62	156	84	177	68	119	106	66	75	80	86	8.9012	3.43665	7.31306	4.828	9.17412	3.79293	6.5628	4.83747	3.40896	3.8836	4.10184	4.9155	2.59008	1.51472	2.41874	1.35666	0.877783	0.834471	1.08793	0.0551979	1	+	+	+	-	-	-	Intron (XM_001120757.5/724853, intron 4 of 6)	6546417	6695228	148812	+	724853	XM_001120757.5
NC_037640.1	9943243	9944208	9943321;9943842;9943819;9943848	158	130	281	81	199	149	159	159	121	125	138	86	10.1092	7.14605	13.1356	4.6576	10.308	8.2455	8.7504	7.2336	6.20736	6.4386	7.03896	4.9155	1.41466	2.82025	1.25014	1.20969	0.964085	1.43199	0.605197	0.335096	1	+	+	+	-	-	-	Intron (XM_006566788.3/724885, intron 1 of 7)	9937452	10035651	98200	+	724885	XM_001120785.5
NC_037640.1	12763387	12764361	12763552;12764136;12764176;12764202	162	117	318	104	211	137	149	163	157	103	132	104	10.3635	6.4369	14.859	5.964	10.9265	7.58586	8.2035	7.41444	8.03904	5.3144	6.73512	5.9325	1.61001	2.49145	1.44038	1.10642	1.51269	1.13529	0.561781	0.200963	1	+	+	+	-	-	-	Promoter (<=1kb)	12764406	12765869	1464	+	724900	XM_026439451.1
NC_037650.1	8042918	8043465	8043016;8043429;8043119;8043200	169	85	144	68	183	76	109	94	77	92	73	75	10.8086	4.6913	6.7541	3.9192	9.48336	4.23269	6.0159	4.29495	3.96864	4.7523	3.74736	4.294	2.30397	1.72334	2.2405	1.40069	0.835099	0.872697	1.01175	0.0153005	1	+	+	+	-	-	-	Distal Intergenic	8027620	8034472	6853	-	724914	XM_001120814.5
NC_037646.1	3319112	3319782	3319424;3319522;3319481	141	86	323	93	159	87	91	94	54	92	33	110	9.02836	4.74585	15.0919	5.3392	8.2464	4.83736	5.03148	4.29495	2.7984	4.7523	1.72176	6.2715	1.90237	2.82662	1.70473	1.17149	0.588852	0.274537	1.66071	0.0310114	1	+	+	+	-	-	-	Intron (XM_026442880.1/725024, intron 12 of 12)	3293858	3303952	10095	-	724936	XM_026442952.1
NC_037646.1	3316951	3318015	3317442;3317504;3317397	160	137	743	61	249	107	102	183	78	133	55	123	10.2364	7.5279	34.6555	3.5216	12.885	5.93676	5.63307	8.31864	4.01952	6.8474	2.83584	7.006	1.35979	9.84084	2.17038	0.677162	0.587014	0.404773	3.0021	0.28561	1	+	+	+	-	-	-	Intron (XM_026442880.1/725024, intron 12 of 12)	3293858	3303952	10095	-	724936	XM_026442952.1
NC_037638.1	19469970	19470369	19470189;19470187;19470198	139	73	151	46	118	65	54	80	91	73	92	69	8.9012	4.0367	7.08016	2.6696	6.13326	3.62802	3.00795	3.66201	4.68096	3.7814	4.70952	3.955	2.20507	2.65214	1.69053	0.821393	1.23789	1.19078	1.01053	0.0405059	1	+	+	+	-	-	-	Promoter (2-3kb)	19467733	19472728	4996	+	724950	XM_016917950.2
NC_037653.1	6751548	6752183	6751687;6751941;6751735;6751962;6751784;6752052	152	104	187	77	172	85	132	112	123	91	68	78	9.72774	5.72775	8.75704	4.4304	8.91642	4.72742	7.27377	5.10873	6.30912	4.7012	3.49416	4.4635	1.69835	1.97658	1.88611	1.42379	1.34202	0.78283	0.648086	0.0636596	1	+	+	+	-	-	-	Promoter (<=1kb)	6751443	6754426	2984	+	725007	XM_016917116.2
NC_037639.1	12652366	12653992	12653012;12652983;12653558;12652995;12653603	365	224	541	181	611	214	234	248	210	231	165	205	23.2703	12.2737	25.2464	10.3376	31.5425	11.8186	12.8521	11.2573	10.7357	11.8552	8.40624	11.639	1.89595	2.44219	2.66889	1.14167	0.905569	0.722248	1.33918	0.0117803	1	+	+	+	-	-	-	Distal Intergenic	12644768	12646285	1518	+	725058	XM_001120954.5
NC_037642.1	3300089	3301054	3300329;3300746;3300337;3300734;3300564	226	148	202	127	323	129	132	140	116	174	79	111	14.4327	8.12795	9.45574	7.2704	16.699	7.1461	7.27377	6.37461	5.95296	8.9425	4.0512	6.328	1.77569	1.30058	2.3368	1.14105	0.665693	0.640202	1.14546	0.0603402	1	+	+	+	-	-	-	Distal Intergenic	3293169	3296782	3614	+	725074	XM_006560014.2
NC_037638.1	17781910	17782343	17782175;17782086;17782073	136	86	145	64	139	96	97	73	54	72	51	62	8.71046	4.74585	6.80068	3.692	7.2156	5.33209	5.35962	3.34554	2.7984	3.7303	2.63328	3.5595	1.83538	1.842	1.35324	1.60202	0.750181	0.739789	0.702203	0.138953	1	+	+	+	-	-	-	Distal Intergenic	17794796	17799327	4532	-	725151	XM_026444941.1
NC_037641.1	7791638	7792057	7791801;7791809;7791904	113	81	122	55	145	87	103	100	73	77	58	55	7.24812	4.4731	5.72934	3.1808	7.52484	4.83736	5.68776	4.56621	3.76512	3.9858	2.98776	3.164	1.62038	1.80123	1.55557	1.24562	0.944633	0.944298	0.667068	0.00978402	1	+	+	+	-	-	-	Intron (XM_026440188.1/100578579, intron 2 of 12)	7855740	7858573	2834	-	725208	XM_006562680.3
NC_037646.1	4284923	4285333	4285103;4285146;4285175	122	79	127	53	113	60	89	83	61	84	18	53	7.82034	4.364	5.96224	3.0672	5.87556	3.35317	4.9221	3.79764	3.15456	4.3435	0.96216	3.051	1.79201	1.94387	1.75224	1.29609	0.726271	0.315359	1.23121	0.060764	1	+	+	+	-	-	-	Intron (XR_001704291.2/725264, intron 1 of 7)	4196760	4364471	167712	-	725264	XM_001121136.5
NC_037644.1	9669972	9670638	9670109;9670310;9670212	144	110	178	86	161	89	154	144	116	122	65	82	9.2191	6.05505	8.33782	4.9416	8.34948	4.9473	8.47695	6.55545	5.95296	6.2853	3.34224	4.6895	1.52255	1.68727	1.68768	1.29311	0.947124	0.712707	0.729891	0.0501269	1	+	+	+	-	-	-	Intron (XM_006565453.3/725329, intron 3 of 5)	9659436	10447465	788030	+	725329	XM_001121189.5
NC_037650.1	5234556	5235132	5234713;5234679;5235033;5234782	165	107	182	74	146	76	60	94	56	95	34	75	10.5543	5.8914	8.52414	4.26	7.57638	4.23269	3.33609	4.29495	2.90016	4.9056	1.7724	4.294	1.79148	2.00097	1.78997	0.776747	0.591194	0.412762	1.64844	0.00108036	1	+	+	+	-	-	-	Intron (XM_006560405.3/410442, intron 2 of 12)	5155643	5245751	90109	-	725354	XM_026444734.1
NC_037639.1	12084323	12085541	12084453;12084935;12085358;12084490;12085235;12084585;12085218	365	192	285	124	393	191	286	213	176	225	148	179	23.2703	10.5282	13.3219	7.1	20.3068	10.5542	15.696	9.67494	9.00576	11.5486	7.54536	10.17	2.21028	1.87632	1.92405	1.62234	0.779814	0.741923	0.934888	0.0660064	1	+	+	+	-	-	-	Intron (XM_006568167.3/410853, intron 3 of 13)	12129848	12134002	4155	-	725491	XM_026439244.1
NC_037649.1	1126395	1126876	1126659;1126641;1126648	83	47	197	45	137	67	72	78	81	67	89	49	5.34072	2.6184	9.22284	2.6128	7.11252	3.73796	3.99237	3.57159	4.17216	3.4748	4.5576	2.825	2.03969	3.52987	1.90278	1.11781	1.20069	1.61331	0.926365	0.142957	1	+	+	+	-	-	-	Intron (XM_026444364.1/551490, intron 1 of 24)	1140523	1150624	10102	+	725498	XM_016915478.2
NC_037644.1	8632431	8632833	8632611;8632675;8632682	105	64	81	40	79	50	67	66	52	50	50	55	6.73948	3.54575	3.81956	2.3288	4.1232	2.80347	3.71892	3.02907	2.69664	2.6061	2.58264	3.164	1.90072	1.64014	1.47075	1.22774	1.03474	0.816258	0.702933	0.0203117	1	+	+	+	-	-	-	Promoter (<=1kb)	8624525	8632668	8144	-	725594	XM_006564265.3
NC_037638.1	6801092	6801613	6801338;6801321;6801372	131	56	221	50	144	53	106	86	102	69	61	65	8.39256	3.10935	10.3408	2.8968	7.4733	2.96838	5.85183	3.93327	5.24064	3.577	3.13968	3.729	2.69914	3.56973	2.51764	1.48778	1.46509	0.841963	1.21125	0.0175421	1	+	+	+	-	-	-	Promoter (1-2kb)	6788096	6799975	11880	-	725775	XM_006564976.3
NC_037640.1	7395831	7396313	7395941;7396079;7396155	125	89	144	67	128	83	91	96	61	86	73	102	8.01108	4.9095	6.7541	3.8624	6.64866	4.61748	5.03148	4.38537	3.15456	4.4457	3.74736	5.8195	1.63175	1.74868	1.43989	1.14733	0.709576	0.643932	0.946716	0.0212777	1	+	+	+	-	-	-	Intron (XM_026439645.1/725792, intron 1 of 7)	7390973	7456091	65119	+	725792	XM_026439645.1
NC_037639.1	15760219	15761668	15760674;15761080;15761275;15760883;15761246;15760885	416	186	355	188	482	226	234	189	174	224	129	193	26.5129	10.2009	16.5825	10.7352	24.8938	12.4782	12.8521	8.5899	8.904	11.4975	6.5832	10.961	2.59907	1.54468	1.99498	1.49619	0.774429	0.600602	1.09628	0.0574536	1	+	+	+	-	-	-	Exon (XM_026438856.1/409821, exon 128 of 143)	15766714	15769349	2636	-	725828	XM_006568756.3
NC_037640.1	2935367	2935731	2935537;2935545;2935553	106	66	153	65	123	61	82	88	67	64	78	45	6.80306	3.65485	7.17332	3.7488	6.39096	3.40814	4.53927	4.02369	3.45984	3.3215	4.00056	2.599	1.86138	1.9135	1.8752	1.12814	1.04165	1.53927	0.60722	0.0506073	1	+	+	+	-	-	-	Promoter (2-3kb)	2933138	3037638	104501	+	725829	XM_026439831.1
NC_037640.1	2943896	2944232	2943978;2944053;2944009;2944065	108	75	99	41	109	63	76	92	63	77	46	56	6.93022	4.1458	4.658	2.3856	5.6694	3.51808	4.21113	4.20453	3.25632	3.9858	2.38008	3.2205	1.67162	1.95255	1.6115	1.00157	0.81698	0.739041	1.03359	0.00322512	1	+	+	+	-	-	-	Intron (XM_026439831.1/725829, intron 2 of 5)	2933138	3037638	104501	+	725829	XM_026439831.1
NC_037648.1	3938094	3938894	3938508;3938455;3938504	141	66	252	86	223	66	99	75	44	66	87	70	9.02836	3.65485	11.7847	4.9416	11.545	3.68299	5.469	3.43596	2.2896	3.4237	4.45632	4.0115	2.47024	2.38479	3.13468	1.59169	0.66875	1.11089	1.24483	0.0128561	1	+	+	+	-	-	-	Intron (XM_026443786.1/725924, intron 1 of 4)	3583920	4087918	503999	-	725924	XM_026443786.1
NC_037638.1	6221059	6221609	6221190;6221399;6221324;6221352	132	94	156	59	176	100	124	111	93	99	85	87	8.45614	5.18225	7.31306	3.408	9.12258	5.55197	6.83625	5.06352	4.78272	5.11	4.35504	4.972	1.63175	2.14585	1.64312	1.3501	0.935953	0.875913	0.777665	0.0296727	1	+	+	+	-	-	-	Intron (XM_026446016.1/409807, intron 3 of 3)	6178110	6227746	49637	-	726119	XM_026446012.1
NC_037651.1	8983394	8983959	8983663;8983615;8983697	146	89	212	93	182	90	140	115	125	126	87	83	9.34626	4.9095	9.92154	5.3392	9.43182	5.00227	7.71129	5.24436	6.41088	6.4897	4.45632	4.746	1.90371	1.85824	1.88551	1.4704	0.987855	0.938963	0.73325	0.0467327	1	+	+	+	-	-	-	Promoter (<=1kb)	8977982	8982942	4961	-	726276	XM_001122027.5
NC_037642.1	6321972	6322393	6322280;6322149;6322210	114	78	163	62	134	86	84	92	55	85	62	75	7.3117	4.30945	7.63912	3.5784	6.9579	4.78239	4.64865	4.20453	2.84928	4.3946	3.19032	4.294	1.69667	2.13479	1.4549	1.10563	0.648359	0.742972	1.0821	0.0228595	1	+	+	+	-	-	-	Intron (XM_006562117.3/726284, intron 3 of 4)	6311355	6328953	17599	+	726284	XM_001122035.5
NC_037642.1	6322715	6323223	6323001;6322993;6322986	166	79	189	74	158	77	98	106	84	89	52	58	10.6179	4.364	8.8502	4.26	8.19486	4.28766	5.41431	4.83747	4.3248	4.599	2.68392	3.3335	2.43307	2.07751	1.91127	1.11924	0.940378	0.805136	1.16457	0.0054402	1	+	+	+	-	-	-	Exon (XM_006562117.3/726284, exon 4 of 5)	6311355	6328953	17599	+	726284	XM_001122035.5
NC_037642.1	6324643	6325220	6324722;6324769;6325196;6324849	124	83	155	81	146	62	77	97	51	77	46	93	7.9475	4.5822	7.26648	4.6576	7.57638	3.46311	4.26582	4.43058	2.64576	3.9858	2.38008	5.311	1.73443	1.56013	2.18774	0.962813	0.663796	0.448142	1.40184	0.0101135	1	+	+	+	-	-	-	3' UTR	6311355	6328953	17599	+	726284	XM_001122035.5
NC_037652.1	4771666	4773158	4772138;4772482;4772967;4771820;4772626;4772980;4772379	431	230	407	176	529	225	294	245	252	253	133	213	27.4666	12.6011	19.0046	10.0536	27.3162	12.4232	16.1335	11.1217	12.8726	12.9794	6.78576	12.091	2.1797	1.89033	2.19881	1.45063	0.991772	0.561224	1.06149	0.0376771	1	+	+	+	-	-	-	5' UTR	4768486	4881872	113387	+	726331	XM_001122075.5
NC_037638.1	19686	20172	19943;19954;19969	187	59	236	72	120	59	45	87	38	59	35	71	11.953	3.273	11.0395	4.1464	6.23634	3.2982	2.51574	3.97848	1.98432	3.066	1.82304	4.068	3.652	2.66243	1.89083	0.632337	0.647202	0.448142	2.24771	0.0494557	1	+	+	+	-	-	-	Exon (XM_026446303.1/726347, exon 10 of 20)	17090	23457	6368	-	726347	XM_026446303.1
NC_037644.1	40338	40690	40476;40494;40552	122	83	115	54	142	62	98	88	97	64	56	73	7.82034	4.5822	5.40328	3.124	7.37022	3.46311	5.41431	4.02369	4.98624	3.3215	2.88648	4.181	1.70668	1.7296	2.12821	1.34561	1.5012	0.69038	0.653646	0.0942953	1	+	+	+	-	-	-	Promoter (1-2kb)	22658	39236	16579	-	726399	XM_006557303.3
NC_037644.1	13466929	13467710	13467137;13467136;13467133	176	127	268	91	256	119	120	160	102	95	115	100	11.2537	6.9824	12.53	5.2256	13.2458	6.5964	6.61749	7.27881	5.24064	4.9056	5.87424	5.7065	1.61172	2.39781	2.00803	0.909144	1.0683	1.02939	1.00093	0.0423942	1	+	+	+	-	-	-	Promoter (<=1kb)	13468072	13470546	2475	+	726400	XM_001122142.5
NC_037638.1	198186	198778	198326;198663;198384;198576;198572	160	108	155	58	181	108	135	133	104	86	35	103	10.2364	5.94595	7.26648	3.3512	9.38028	5.99173	7.43784	6.05814	5.3424	4.4457	1.82304	5.876	1.72158	2.16832	1.56554	1.22774	1.2017	0.310252	0.993679	0.0752801	1	+	+	+	-	-	-	Promoter (1-2kb)	134890	199963	65074	-	726544	XM_006557379.3
NC_037638.1	7546385	7546972	7546674;7546616;7546756	175	83	186	81	199	87	118	120	58	104	74	83	11.1901	4.5822	8.71046	4.6576	10.308	4.83736	6.50811	5.47041	3.00192	5.3655	3.798	4.746	2.44208	1.87016	2.13091	1.18969	0.559486	0.800253	1.33759	0.00647447	1	+	+	+	-	-	-	Intron (XM_026444616.1/113219185, intron 1 of 4)	7557710	7560194	2485	+	726545	XM_001122272.5
NC_037651.1	7849000	7849487	7849256;7849283;7849276	146	76	202	73	111	56	92	98	79	63	78	55	9.34626	4.20035	9.45574	4.2032	5.77248	3.13329	5.08617	4.47579	4.0704	3.2704	4.00056	3.164	2.22511	2.24965	1.84231	1.13637	1.24462	1.2644	0.793183	0.0149786	1	+	+	+	-	-	-	Intron (XM_006562939.3/726582, intron 1 of 10)	7842503	7882776	40274	+	726582	XM_026444900.1
NC_037643.1	2634274	2634654	2634473;2634456;2634481	104	74	140	46	106	55	105	100	99	77	54	66	6.6759	4.09125	6.56778	2.6696	5.51478	3.07832	5.79714	4.56621	5.088	3.9858	2.7852	3.7855	1.63175	2.46021	1.79149	1.26957	1.27653	0.735755	0.842149	0.0555265	1	+	+	+	-	-	-	Distal Intergenic	2674934	2676864	1931	+	726672	XM_026441301.1
NC_037645.1	1711252	1711711	1711468;1711500;1711481	119	72	164	65	118	71	79	88	71	68	61	66	7.6296	3.98215	7.6857	3.7488	6.13326	3.95784	4.3752	4.02369	3.66336	3.5259	3.13968	3.7855	1.91595	2.05018	1.54965	1.08736	1.03899	0.829396	0.900043	0.0145792	1	+	+	+	-	-	-	Distal Intergenic	1718648	1729123	10476	+	726871	XM_026442531.1
NC_037638.1	1122904	1123391	1123113;1123105;1123123	163	88	151	82	164	89	118	95	102	83	78	77	10.4271	4.85495	7.08016	4.7144	8.5041	4.9473	6.50811	4.34016	5.24064	4.2924	4.00056	4.407	2.14773	1.50182	1.71894	1.49951	1.22091	0.907774	0.565262	0.0863175	1	+	+	+	-	-	-	Intron (XM_026439854.1/726886, intron 1 of 7)	1056771	1147819	91049	-	726886	XM_026439854.1
NC_037638.1	1120640	1121058	1120815;1120819;1120910	111	62	145	63	132	53	77	90	89	65	48	68	7.12096	3.43665	6.80068	3.6352	6.85482	2.96838	4.26582	4.11411	4.5792	3.3726	2.48136	3.8985	2.07206	1.87079	2.30928	1.03688	1.35777	0.636491	1.04449	0.0178356	1	+	+	+	-	-	-	Intron (XM_026439854.1/726886, intron 1 of 7)	1056771	1147819	91049	-	726886	XM_026439854.1
NC_037638.1	1117192	1117788	1117547;1117497;1117456	248	111	252	86	224	54	113	128	114	105	79	74	15.8314	6.1096	11.7847	4.9416	11.5965	3.02335	6.23466	5.83209	5.8512	5.4166	4.0512	4.2375	2.59123	2.38479	3.83565	1.06903	1.08023	0.956035	1.50468	0.0513385	1	+	+	+	-	-	-	Intron (XM_026439854.1/726886, intron 1 of 7)	1056771	1147819	91049	-	726886	XM_026439854.1
NC_037638.1	1254483	1255054	1254643;1254904;1254805;1254801	128	90	194	69	168	80	73	81	74	99	63	51	8.20182	4.96405	9.0831	3.976	8.71026	4.45257	4.04706	3.70722	3.816	5.11	3.24096	2.938	1.65224	2.28448	1.95623	1.09167	0.746771	1.10312	1.00241	0.0151808	1	+	+	+	-	-	-	Intron (XM_016917650.2/726912, intron 1 of 7)	1284336	1385267	100932	+	726912	XM_026440446.1
NC_037638.1	1256210	1256758	1256365;1256369;1256420	176	109	140	91	170	89	111	111	71	95	48	95	11.2537	6.0005	6.56778	5.2256	8.81334	4.9473	6.12528	5.06352	3.66336	4.9056	2.48136	5.424	1.87546	1.25685	1.78144	1.20969	0.746771	0.457478	1.02544	0.0469409	1	+	+	+	-	-	-	Intron (XM_016917650.2/726912, intron 1 of 7)	1284336	1385267	100932	+	726912	XM_026440446.1
NC_037638.1	1307375	1307951	1307565;1307576;1307625	166	104	188	68	192	109	132	111	73	96	65	105	10.6179	5.72775	8.80362	3.9192	9.94722	6.0467	7.27377	5.06352	3.76512	4.9567	3.34224	5.989	1.85376	2.24628	1.64507	1.4365	0.759602	0.558063	1.06072	0.0427561	1	+	+	+	-	-	-	Intron (XM_016917650.2/726912, intron 1 of 7)	1284336	1385267	100932	+	726912	XM_026440446.1
NC_037652.1	8766110	8767055	8766307;8766809;8766289;8766799;8766347	193	116	351	115	328	128	167	153	155	140	116	141	12.3345	6.38235	16.3962	6.5888	16.9567	7.09113	9.18792	6.96234	7.93728	7.2051	5.92488	8.023	1.9326	2.4885	2.39125	1.31966	1.10162	0.738487	1.10833	0.00723031	1	+	+	+	-	-	-	Promoter (1-2kb)	8762398	8764417	2020	-	726965	XM_006563652.3
NC_037646.1	11868464	11870027	11868918;11868717;11869292;11869792;11869847;11869874	402	233	334	185	430	211	241	227	174	214	166	219	25.6227	12.7647	15.6043	10.5648	22.2137	11.6536	13.235	10.3079	8.904	10.9865	8.45688	12.43	2.00731	1.47701	1.90617	1.28397	0.810449	0.68036	0.958043	0.0242053	1	+	+	+	-	-	-	Exon (XM_026443000.1/727000, exon 2 of 16)	11841389	11889556	48168	-	727000	XM_026443000.1
NC_037650.1	1749101	1749825	1749269;1749651;1749248;1749289;1749628	224	127	192	91	183	108	151	128	136	110	93	100	14.3055	6.9824	8.98994	5.2256	9.48336	5.99173	8.31288	5.83209	6.97056	5.6721	4.76016	5.7065	2.04879	1.72037	1.58274	1.42537	1.22892	0.834165	0.617464	0.0518115	1	+	+	+	-	-	-	Exon (XM_006572115.3/552030, exon 5 of 8)	1761527	1763439	1913	-	727025	XM_001122738.5
NC_037642.1	720221	720711	720434;720438;720569	110	95	114	56	120	66	86	93	71	91	48	69	7.05738	5.2368	5.3567	3.2376	6.23634	3.68299	4.75803	4.24974	3.66336	4.7012	2.48136	3.955	1.34765	1.65453	1.69328	1.1196	0.779239	0.627398	0.894274	0.0190735	1	+	+	+	-	-	-	Distal Intergenic	623703	664815	41113	-	727035	XM_006572351.3
NC_037638.1	13434446	13434950	13434695;13434681;13434795	89	72	149	60	134	67	91	98	74	67	70	84	5.7222	3.98215	6.987	3.4648	6.9579	3.73796	5.03148	4.47579	3.816	3.4748	3.59544	4.8025	1.43696	2.01657	1.86142	1.12415	1.09819	0.74866	0.839103	0.0254053	1	+	+	+	-	-	-	Intron (XM_026445792.1/725885, intron 5 of 5)	13337080	13338460	1381	-	727243	XM_001122953.5
NC_037639.1	8263186	8263683	8263320;8263598;8263457;8263315	114	81	117	67	140	62	115	94	68	90	51	79	7.3117	4.4731	5.49644	3.8624	7.26714	3.46311	6.34404	4.29495	3.51072	4.6501	2.63328	4.52	1.63459	1.42306	2.09844	1.47709	0.754977	0.582584	0.873323	0.08891	1	+	+	+	-	-	-	Intron (XR_003304182.1/113218598, intron 3 of 3)	8167809	8221278	53470	-	727308	XM_026439066.1
NC_037639.1	8261350	8261883	8261545;8261571;8261677	136	105	167	82	174	78	91	86	78	95	80	74	8.71046	5.7823	7.82544	4.7144	9.0195	4.34263	5.03148	3.93327	4.01952	4.9056	4.10184	4.2375	1.5064	1.6599	2.07697	1.27921	0.819374	0.967986	0.773841	0.0313078	1	+	+	+	-	-	-	Intron (XR_003304182.1/113218598, intron 3 of 3)	8167809	8221278	53470	-	727308	XM_026439066.1
NC_037651.1	10529194	10529710	10529546;10529514;10529536	138	88	169	82	128	52	119	117	98	89	68	84	8.83762	4.85495	7.9186	4.7144	6.64866	2.91341	6.5628	5.33478	5.03712	4.599	3.49416	4.8025	1.82033	1.67966	2.28209	1.23019	1.09526	0.727571	0.921349	0.0194545	1	+	+	+	-	-	-	Promoter (1-2kb)	10531626	10545079	13454	+	727335	XM_006565634.3
NC_037650.1	10405461	10406946	10405648;10405749;10406142;10406402;10405727;10406223;10406513;10406880	369	238	382	158	428	215	230	247	160	267	126	186	23.5246	13.0374	17.8401	9.0312	22.1107	11.8735	12.6334	11.2121	8.19168	13.6948	6.43128	10.5655	1.80439	1.97539	1.86219	1.12676	0.59816	0.608706	1.27362	0.0178595	1	+	+	+	-	-	-	Exon (XM_026444822.1/551272, exon 11 of 15)	10414392	10414491	100	+	100315689	NR_034303.1
NC_037648.1	2019913	2020441	2020056;2020170;2020192;2020143	140	115	155	68	174	72	126	117	102	94	48	76	8.96478	6.3278	7.26648	3.9192	9.0195	4.01281	6.94563	5.33478	5.24064	4.8545	2.48136	4.3505	1.41673	1.85407	2.24768	1.30195	1.07954	0.570362	0.902648	0.0577901	1	+	+	+	-	-	-	Distal Intergenic	2058723	2065932	7210	+	100576080	XR_001705094.2
NC_037651.1	4361555	4362214	4361701;4362008;4361770;4362035;4361861	191	130	152	72	196	100	134	111	101	121	68	84	12.2074	7.14605	7.12674	4.1464	10.1534	5.55197	7.38315	5.06352	5.18976	6.2342	3.49416	4.8025	1.70827	1.71878	1.82879	1.45811	0.832466	0.727571	0.800261	0.0782324	1	+	+	+	-	-	-	Distal Intergenic	4373892	4376854	2963	-	100576122	XR_408654.2
NC_037642.1	9037165	9037819	9037499;9037598;9037468	157	99	195	102	234	70	142	135	105	93	79	75	10.0456	5.455	9.12968	5.8504	12.1119	3.90287	7.82067	6.14856	5.39328	4.8034	4.0512	4.294	1.84154	1.56052	3.10333	1.27195	1.1228	0.943456	0.962561	0.15135	1	+	+	+	-	-	-	Intron (XM_006565568.3/100576129, intron 1 of 6)	8898314	9055619	157306	-	100576129	XM_006565568.3
NC_037642.1	8981760	8982271	8982069;8982103;8982008	160	98	149	75	149	79	122	112	70	110	69	98	10.2364	5.40045	6.987	4.3168	7.731	4.3976	6.72687	5.10873	3.61248	5.6721	3.5448	5.5935	1.89547	1.61856	1.758	1.31674	0.636886	0.633736	1.02688	0.0462873	1	+	+	+	-	-	-	Intron (XM_006565568.3/100576129, intron 1 of 6)	8898314	9055619	157306	-	100576129	XM_006565568.3
NC_037642.1	8976143	8977641	8976274;8976621;8977058;8977483;8976584;8976890;8977019;8977060	326	202	401	194	534	160	343	272	195	228	154	202	20.7907	11.0737	18.7252	11.076	27.5739	8.85017	18.8134	12.3423	9.97248	11.7019	7.8492	11.4695	1.87748	1.69061	3.11564	1.5243	0.85221	0.684354	1.12671	0.0958308	1	+	+	+	-	-	-	Intron (XM_006565568.3/100576129, intron 1 of 6)	8898314	9055619	157306	-	100576129	XM_006565568.3
NC_037647.1	1006515	1007327	1006636;1007042;1007018;1006629;1007071	163	105	256	83	204	101	138	144	108	113	93	83	10.4271	5.7823	11.9711	4.7712	10.5657	5.60694	7.60191	6.55545	5.54592	5.8254	4.76016	4.746	1.80328	2.50903	1.8844	1.15963	0.952024	1.00298	0.992437	0.0359701	1	+	+	+	-	-	-	Promoter (1-2kb)	1005386	1069102	63717	+	100576134	XM_006557795.3
NC_037647.1	1061179	1061529	1061391;1061358;1061386	95	59	115	45	120	54	92	75	71	74	50	37	6.10368	3.273	5.40328	2.6128	6.23634	3.02335	5.08617	3.43596	3.66336	3.8325	2.58264	2.147	1.86486	2.068	2.06273	1.48028	0.955867	1.20291	0.720339	0.0215452	1	+	+	+	-	-	-	Intron (XM_006557795.3/100576134, intron 1 of 3)	1053681	1069102	15422	+	100576134	XM_006557794.3
NC_037642.1	8653387	8654763	8653618;8654176;8654585;8653738;8653663;8653855	347	214	311	185	408	183	254	238	159	221	147	198	22.1258	11.7283	14.533	10.5648	21.0799	10.1145	13.9459	10.8052	8.1408	11.3442	7.49472	11.2435	1.88653	1.37561	2.08413	1.29067	0.717618	0.666582	0.999064	0.0377377	1	+	+	+	-	-	-	Distal Intergenic	8678387	8837618	159232	+	100576196	XM_006565579.3
NC_037642.1	8744616	8745342	8744736;8745076;8745044;8745165	174	119	193	89	161	112	116	102	88	108	68	113	11.1265	6.546	9.03652	5.112	8.34948	6.21161	6.39873	4.65663	4.52832	5.5699	3.49416	6.441	1.69974	1.76771	1.34417	1.37411	0.812998	0.542487	0.817835	0.0861932	1	+	+	+	-	-	-	Intron (XM_006565579.3/100576196, intron 3 of 11)	8678387	8837618	159232	+	100576196	XM_006565581.3
NC_037647.1	2409485	2410116	2409663;2409721;2409928	140	109	127	60	186	102	136	119	86	106	100	90	8.96478	6.0005	5.96224	3.4648	9.63798	5.66191	7.49253	5.4252	4.42656	5.4677	5.11464	5.1415	1.49401	1.7208	1.70225	1.38106	0.809584	0.994776	0.626312	0.0586093	1	+	+	+	-	-	-	Intron (XM_006559228.2/100576247, intron 1 of 1)	2406341	2495006	88666	+	100576247	XM_006559230.3
NC_037643.1	11300300	11300996	11300601;11300693;11300683	179	86	322	100	285	132	136	117	107	120	78	89	11.4444	4.74585	15.0453	5.7368	14.7404	7.31101	7.49253	5.33478	5.49504	6.1831	4.00056	5.085	2.41145	2.62259	2.01619	1.40447	0.888719	0.786737	1.19478	0.007232	1	+	+	+	-	-	-	Distal Intergenic	11310906	11313905	3000	+	100576253	XM_003251159.4
NC_037643.1	11312083	11312540	11312309;11312342;11312309	190	55	167	48	214	75	84	85	96	71	57	73	12.1438	3.0548	7.82544	2.7832	11.0811	4.17772	4.64865	3.88806	4.93536	3.6792	2.93712	4.181	3.97532	2.81167	2.65243	1.19562	1.34142	0.702492	1.54291	0.023364	1	+	+	+	-	-	-	Promoter (1-2kb)	11310906	11313905	3000	+	100576253	XM_006568235.3
NC_037643.1	11322385	11322773	11322575;11322539;11322609	103	52	126	50	139	47	87	56	59	56	47	78	6.61232	2.89115	5.91566	2.8968	7.2156	2.63856	4.81272	2.57697	3.0528	2.9127	2.43072	4.4635	2.28709	2.04214	2.73467	1.86759	1.0481	0.544577	1.02958	0.0695723	1	+	+	+	-	-	-	Distal Intergenic	11310906	11313905	3000	+	100576253	XM_006568235.3
NC_037641.1	8369816	8370420	8369997;8370261;8370398	134	103	147	73	160	73	106	124	58	93	45	69	8.5833	5.6732	6.89384	4.2032	8.29794	4.06778	5.85183	5.65125	3.00192	4.8034	2.32944	3.955	1.51296	1.64014	2.03992	1.03549	0.624957	0.588986	1.20701	0.0103672	1	+	+	+	-	-	-	Intron (XR_001702723.2/100576283, intron 2 of 4)	8278883	8378539	99657	-	100576283	XR_001702723.2
NC_037641.1	6137873	6138496	6138085;6138071;6138099	161	98	171	66	195	99	139	111	63	80	79	84	10.3	5.40045	8.01176	3.8056	10.1018	5.497	7.6566	5.06352	3.25632	4.1391	4.0512	4.8025	1.90725	2.10526	1.83769	1.51211	0.786722	0.843561	0.896622	0.0483733	1	+	+	+	-	-	-	Intron (XM_026440483.1/100576383, intron 2 of 8)	5975873	6113734	137862	-	100576383	XM_026440488.1
NC_037641.1	6445582	6446227	6445974;6446047;6445816;6446054	210	107	263	87	164	104	121	111	122	98	109	84	13.4154	5.8914	12.2971	4.9984	8.5041	5.77185	6.67218	5.06352	6.25824	5.0589	5.5704	4.8025	2.27712	2.46021	1.47338	1.3177	1.23708	1.1599	0.741523	0.107912	1	+	+	+	-	-	-	Intron (XM_026440483.1/100576383, intron 2 of 8)	5975873	6453447	477575	-	100576383	XM_026440483.1
NC_037641.1	6406841	6407626	6406982;6407493;6406991;6407007;6407453;6407487	208	112	234	79	262	98	128	125	106	105	115	101	13.2882	6.16415	10.9463	4.544	13.555	5.44203	7.05501	5.69646	5.44416	5.4166	5.87424	5.763	2.15572	2.40896	2.4908	1.23849	1.00509	1.0193	1.1126	0.000807244	1	+	+	+	-	-	-	Intron (XM_026440483.1/100576383, intron 2 of 8)	5975873	6453447	477575	-	100576383	XM_026440483.1
NC_037649.1	1334213	1334706	1334404;1334407;1334506	133	108	148	65	176	79	78	91	56	91	47	57	8.51972	5.94595	6.94042	3.7488	9.12258	4.3976	4.32051	4.15932	2.90016	4.7012	2.43072	3.277	1.43286	1.85137	2.07445	1.03875	0.616898	0.741752	1.1604	0.0162102	1	+	+	+	-	-	-	Intron (XM_006558301.3/100576428, intron 3 of 3)	1318248	1357006	38759	+	100576428	XM_006558301.3
NC_037642.1	2831910	2832462	2832085;2832144;2832165	170	98	155	65	199	86	147	83	79	78	61	87	10.8722	5.40045	7.26648	3.7488	10.308	4.78239	8.09412	3.79764	4.0704	4.0369	3.13968	4.972	2.0132	1.93835	2.15541	2.13136	1.0083	0.631472	0.695459	0.224333	1	+	+	+	-	-	-	Intron (XM_026440701.1/100576449, intron 4 of 12)	2813956	2859419	45464	+	100576449	XM_006557904.3
NC_037638.1	21522927	21523428	21523160;21523228;21523186	181	92	201	69	139	77	62	70	47	98	39	75	11.5716	5.07315	9.40916	3.976	7.2156	4.28766	3.44547	3.20991	2.44224	5.0589	2.0256	4.294	2.28095	2.36649	1.68288	1.07339	0.482761	0.471728	1.64231	0.00818409	1	+	+	+	-	-	-	Intron (XM_003251673.4/100576454, intron 5 of 9)	21512675	21531869	19195	+	100576454	XM_006571377.3
NC_037650.1	3094324	3095304	3094609;3095147;3094745;3094723	240	155	327	147	385	125	186	190	132	151	121	134	15.3228	8.5098	15.2782	8.4064	19.8944	6.92622	10.227	8.63511	6.76704	7.7672	6.17808	7.6275	1.80061	1.81745	2.87233	1.18435	0.871233	0.809974	1.17949	0.0644891	1	+	+	+	-	-	-	Exon (XM_026444645.1/413266, exon 3 of 10)	3088557	3091556	3000	+	100576508	XR_001705307.2
NC_037643.1	11032512	11033253	11032744;11032748;11032710;11033083	220	110	185	101	197	96	142	110	81	111	77	93	14.0512	6.05505	8.66388	5.7936	10.2049	5.33209	7.82067	5.01831	4.17216	5.7232	3.94992	5.311	2.32058	1.49542	1.91386	1.55843	0.728991	0.743724	0.918639	0.0696169	1	+	+	+	-	-	-	Distal Intergenic	11046450	11055877	9428	-	100576573	XR_001703494.2
NC_037643.1	11010167	11010587	11010372;11010404;11010437	146	69	123	64	129	64	115	97	66	75	49	62	9.34626	3.8185	5.77592	3.692	6.7002	3.57305	6.34404	4.43058	3.40896	3.8836	2.532	3.5595	2.44763	1.56444	1.8752	1.43188	0.877783	0.711336	0.962576	0.0491585	1	+	+	+	-	-	-	Distal Intergenic	11046450	11055877	9428	-	100576573	XR_001703494.2
NC_037650.1	3521256	3521686	3521452;3521464;3521449	127	60	135	56	152	64	85	74	68	75	75	63	8.13824	3.32755	6.33488	3.2376	7.88562	3.57305	4.70334	3.39075	3.51072	3.8836	3.84864	3.616	2.44572	1.95666	2.20697	1.38711	0.903986	1.06434	0.978009	0.00563566	1	+	+	+	-	-	-	Promoter (1-2kb)	3509776	3519756	9981	-	100576671	XM_006558515.3
NC_037649.1	6356412	6357139	6356579;6356917;6356697;6356930;6356625;6357031	199	116	269	121	189	99	160	130	139	143	89	102	12.716	6.38235	12.5766	6.9296	9.7926	5.497	8.80509	5.92251	7.1232	7.3584	4.5576	5.8195	1.99237	1.81491	1.78144	1.48672	0.968037	0.78316	0.787455	0.0545343	1	+	+	+	-	-	-	Distal Intergenic	6348246	6348995	750	+	100576689	XR_003305865.1
NC_037638.1	23954232	23954688	23954483;23954484;23954491	140	89	137	69	189	77	105	102	92	68	46	78	8.96478	4.9095	6.42804	3.976	9.7926	4.28766	5.79714	4.65663	4.73184	3.5259	2.38008	4.4635	1.82601	1.61671	2.2839	1.24492	1.34202	0.533232	0.876056	0.0579932	1	+	+	+	-	-	-	Promoter (<=1kb)	23954915	23963214	8300	+	100576697	XR_003304554.1
NC_037651.1	3470343	3470668	3470496;3470519;3470563	74	47	102	44	90	48	57	40	38	61	31	56	4.7685	2.6184	4.79774	2.556	4.69014	2.69353	3.17202	1.85361	1.98432	3.1682	1.62048	3.2205	1.82115	1.87705	1.74126	1.71127	0.626324	0.503177	0.937184	0.151259	1	+	+	+	-	-	-	Promoter (2-3kb)	3467543	3471067	3525	+	100576803	XR_001705619.1
NC_037643.1	9469181	9469642	9469429;9469305;9469413;9469382	126	74	143	60	199	65	98	65	85	91	87	68	8.07466	4.09125	6.70752	3.4648	10.308	3.62802	5.41431	2.98386	4.37568	4.7012	4.45632	3.8985	1.97364	1.9359	2.84122	1.81453	0.930758	1.14309	0.795883	0.0752501	1	+	+	+	-	-	-	Distal Intergenic	9325439	9456365	130927	-	100576868	XR_003304823.1
NC_037645.1	4171445	4172005	4171742;4171722;4171737	168	108	209	66	212	64	93	102	126	93	131	84	10.745	5.94595	9.7818	3.8056	10.978	3.57305	5.14086	4.65663	6.46176	4.8034	6.68448	4.8025	1.80711	2.57037	3.07245	1.10399	1.34525	1.39188	0.955703	0.0747384	1	+	+	+	-	-	-	Promoter (2-3kb)	4168496	4170582	2087	+	100576982	XM_003250085.4
NC_037651.1	7458462	7458904	7458684;7458699;7458697	126	56	198	83	252	67	92	84	72	63	60	39	8.07466	3.10935	9.26942	4.7712	13.0396	3.73796	5.08617	3.84285	3.71424	3.2704	3.08904	2.26	2.5969	1.94279	3.48843	1.32354	1.13571	1.36683	1.06919	0.0853879	1	+	+	+	-	-	-	Exon (XM_026445146.1/100577030, exon 9 of 10)	7448263	7450597	2335	-	100577065	XM_016916229.2
NC_037647.1	9986586	9987228	9986940;9986820;9986864	192	108	156	62	179	98	144	114	73	102	85	83	12.2709	5.94595	7.31306	3.5784	9.2772	5.44203	7.93005	5.19915	3.76512	5.2633	4.35504	4.746	2.06374	2.04367	1.70473	1.52526	0.715353	0.917623	0.879951	0.0495071	1	+	+	+	-	-	-	Promoter (<=1kb)	9985792	9990447	4656	+	100577069	XM_026443346.1
NC_037642.1	8024989	8025560	8025298;8025214;8025394	144	75	135	87	147	75	120	113	88	75	77	82	9.2191	4.1458	6.33488	4.9984	7.62792	4.17772	6.61749	5.15394	4.52832	3.8836	3.94992	4.6895	2.22372	1.26738	1.82586	1.28397	1.16601	0.84229	0.691519	0.119798	1	+	+	+	-	-	-	Intron (XM_016912223.2/552079, intron 10 of 12)	8103506	8112331	8826	-	100577164	XR_003304645.1
NC_037642.1	7989779	7990302	7989947;7990108;7989962	147	82	140	68	180	75	107	82	77	109	63	92	9.40984	4.52765	6.56778	3.9192	9.32874	4.17772	5.90652	3.75243	3.96864	5.621	3.24096	5.2545	2.07831	1.6758	2.23297	1.57405	0.706038	0.616797	1.04735	0.0572492	1	+	+	+	-	-	-	Intron (XM_016912223.2/552079, intron 9 of 12)	8103506	8112331	8826	-	100577164	XR_003304645.1
NC_037640.1	4770457	4771043	4770744;4770736;4770789	106	59	258	69	121	59	74	69	63	77	50	55	6.80306	3.273	12.0642	3.976	6.28788	3.2982	4.10175	3.1647	3.25632	3.9858	2.58264	3.164	2.07854	3.03426	1.90646	1.29609	0.81698	0.816258	1.26075	0.042994	1	+	+	+	-	-	-	Promoter (<=1kb)	4705547	4770825	65279	-	100577174	XM_026439667.1
NC_037646.1	11766132	11766477	11766319;11766305;11766314	85	64	130	42	111	51	83	85	81	71	98	77	5.46788	3.54575	6.10198	2.4424	5.77248	2.85844	4.59396	3.88806	4.17216	3.6792	5.01336	4.407	1.54209	2.49835	2.01945	1.18156	1.13399	1.13759	0.811388	0.0873848	1	+	+	+	-	-	-	Promoter (1-2kb)	11759701	11768467	8767	-	100577196	XR_003305367.1
NC_037643.1	16396111	16396580	16396407;16396365;16396441	119	64	164	78	132	64	75	111	53	67	43	63	7.6296	3.54575	7.6857	4.4872	6.85482	3.57305	4.15644	5.06352	2.74752	3.4748	2.22816	3.616	2.15176	1.71281	1.91848	0.82086	0.790699	0.616195	1.37624	0.003828	1	+	+	+	-	-	-	Promoter (2-3kb)	16395530	16398609	3080	-	100577286	XR_120593.4
NC_037650.1	10945250	10945855	10945507;10945474;10945485	172	79	159	54	261	78	106	86	78	95	74	77	10.9993	4.364	7.4528	3.124	13.5035	4.34263	5.85183	3.93327	4.01952	4.9056	3.798	4.407	2.52046	2.38566	3.10952	1.48778	0.819374	0.861811	1.33881	0.00647738	1	+	+	+	-	-	-	5' UTR	10936313	10949253	12941	-	100577322	XM_006568046.3
NC_037653.1	1005676	1006112	1005860;1005877;1005883	138	62	140	53	140	48	94	87	83	83	91	63	8.83762	3.43665	6.56778	3.0672	7.26714	2.69353	5.19555	3.97848	4.27392	4.2924	4.65888	3.616	2.57158	2.14129	2.698	1.30591	0.995695	1.28841	1.04565	0.00570277	1	+	+	+	-	-	-	Exon (XM_006557695.3/100576563, exon 7 of 11)	1000799	1077238	76440	+	100577347	XM_026445917.1
NC_037653.1	1007539	1007953	1007719;1007732;1007762	139	52	206	74	150	61	98	78	112	79	95	69	8.9012	2.89115	9.64206	4.26	7.78254	3.40814	5.41431	3.57159	5.74944	4.088	4.86144	3.955	3.07877	2.26339	2.28352	1.51594	1.40642	1.22919	0.877218	0.0398539	1	+	+	+	-	-	-	Intron (XM_026445917.1/100577347, intron 1 of 9)	1000799	1077238	76440	+	100577347	XM_026445917.1
NC_037649.1	1199263	1199774	1199539;1199422;1199566	175	89	165	81	177	96	100	106	50	100	45	77	11.1901	4.9095	7.73228	4.6576	9.17412	5.33209	5.52369	4.83747	2.59488	5.1611	2.32944	4.407	2.27927	1.66014	1.72055	1.14186	0.502777	0.528577	1.38097	0.0156143	1	+	+	+	-	-	-	Intron (XM_026444364.1/551490, intron 1 of 24)	1166945	1168152	1208	-	100577487	XR_119778.4
NC_037641.1	7630962	7631422	7631216;7631226;7631275	132	78	146	63	147	78	71	93	88	78	47	67	8.45614	4.30945	6.84726	3.6352	7.62792	4.34263	3.93768	4.24974	4.52832	4.0369	2.43072	3.842	1.96223	1.8836	1.75652	0.92657	1.12173	0.63267	1.06328	0.0110442	1	+	+	+	-	-	-	Intron (XM_006562687.3/100577492, intron 1 of 17)	7615244	7684709	69466	+	100577492	XM_006562686.3
NC_037638.1	18119830	18120307	18120088;18120055;18120060	145	83	153	57	204	75	95	110	63	65	84	82	9.28268	4.5822	7.17332	3.2944	10.5657	4.17772	5.25024	5.01831	3.25632	3.3726	4.3044	4.6895	2.02581	2.17743	2.52906	1.04622	0.965522	0.91788	1.20039	0.0100053	1	+	+	+	-	-	-	Promoter (<=1kb)	17979145	18120958	141814	-	100577522	XM_016917352.2
NC_037651.1	3634421	3634911	3634677;3634718;3634706	82	60	202	59	129	62	36	90	40	59	58	52	5.27714	3.32755	9.45574	3.408	6.7002	3.46311	2.02353	4.11411	2.08608	3.066	2.98776	2.9945	1.58589	2.77457	1.93473	0.491851	0.680391	0.997749	1.53656	0.0442321	1	+	+	+	-	-	-	Intron (XM_026444937.1/410479, intron 3 of 5)	3798331	3897967	99637	+	100577542	XR_001705610.2
NC_037641.1	8844162	8844623	8844374;8844426;8844433	127	78	158	69	127	66	86	84	98	112	50	83	8.13824	4.30945	7.40622	3.976	6.59712	3.68299	4.75803	3.84285	5.03712	5.7743	2.58264	4.746	1.88846	1.86273	1.79124	1.23815	0.872334	0.544172	1.06199	0.0383022	1	+	+	+	-	-	-	Intron (XM_006562623.3/413113, intron 1 of 2)	8854049	8859442	5394	+	100577562	XM_006562614.3
NC_037641.1	8856887	8858049	8857376;8857829;8857879;8857307;8857689;8857416	287	168	252	159	317	159	192	192	139	180	123	152	18.311	9.21895	11.7847	9.088	16.3897	8.7952	10.5552	8.72553	7.1232	9.2491	6.27936	8.6445	1.98623	1.29673	1.86348	1.20969	0.770151	0.726399	0.927287	0.0409993	1	+	+	+	-	-	-	Promoter (1-2kb)	8855160	8859442	4283	+	100577562	XM_006562616.3
NC_037638.1	645570	646162	645856;645868;645972	150	102	161	78	181	83	126	116	63	105	68	71	9.60058	5.61865	7.54596	4.4872	9.38028	4.61748	6.94563	5.28957	3.25632	5.4166	3.49416	4.068	1.7087	1.68166	2.03147	1.31308	0.601174	0.858938	0.967233	0.0321172	1	+	+	+	-	-	-	Distal Intergenic	669502	687080	17579	-	100577692	XR_003304966.1
NC_037642.1	9883487	9884124	9883750;9883797;9883792	203	109	199	106	181	85	127	100	80	98	73	121	12.9703	6.0005	9.316	6.0776	9.38028	4.72742	7.00032	4.56621	4.12128	5.0589	3.74736	6.893	2.16154	1.53284	1.98423	1.53307	0.814659	0.543647	0.97378	0.0673131	1	+	+	+	-	-	-	Promoter (<=1kb)	9883630	9888491	4862	+	100577717	XM_003251058.4
NC_037639.1	12595611	12597516	12595741;12596094;12596984;12596148;12596791;12597176;12596460;12596833;12597173	466	313	483	195	473	219	245	283	150	299	139	235	29.6919	17.1287	22.5447	11.1328	24.43	12.0934	13.4537	12.8396	7.68288	15.33	7.0896	13.334	1.73346	2.02507	2.02011	1.04783	0.501166	0.531693	1.47367	0.00812032	1	+	+	+	-	-	-	Promoter (<=1kb)	12595987	12598959	2973	+	100577719	XM_006569056.3
NC_037647.1	2166576	2167668	2166731;2167254;2167525;2166739;2167454;2167351	290	152	284	126	274	145	179	165	106	144	108	131	18.5018	8.34615	13.2753	7.2136	14.1735	8.02562	9.8442	7.50486	5.44416	7.4095	5.51976	7.458	2.21681	1.84032	1.76603	1.31171	0.734754	0.740113	1.06331	0.0156392	1	+	+	+	-	-	-	Promoter (1-2kb)	2125375	2164765	39391	-	100577772	XR_003305455.1
NC_037652.1	6865186	6865626	6865348;6865457;6865331	107	73	137	56	127	79	104	98	74	78	61	60	6.86664	4.0367	6.42804	3.2376	6.59712	4.3976	5.74245	4.47579	3.816	4.0369	3.13968	3.4465	1.70105	1.98543	1.50016	1.283	0.94528	0.910976	0.724379	0.0217788	1	+	+	+	-	-	-	Exon (XM_016916551.2/100577783, exon 3 of 7)	6860375	6877013	16639	+	100577783	XM_026445319.1
NC_037641.1	7232062	7232619	7232324;7232430;7232402	102	69	129	66	232	53	87	86	86	90	52	66	6.54874	3.8185	6.0554	3.8056	12.0088	2.96838	4.81272	3.93327	4.42656	4.6501	2.68392	3.7855	1.715	1.59118	4.04557	1.22359	0.951928	0.709	1.34976	0.199867	1	+	+	+	-	-	-	Intron (XM_396254.7/412801, intron 3 of 13)	7104266	7199891	95626	-	100577798	XM_026440400.1
NC_037641.1	7202863	7203473	7203155;7203115;7203152	133	94	142	70	186	56	116	127	96	71	100	102	8.51972	5.18225	6.66094	4.0328	9.63798	3.13329	6.39873	5.78688	4.93536	3.6792	5.11464	5.8195	1.64402	1.65169	3.07599	1.10573	1.34142	0.87888	0.937877	0.158919	1	+	+	+	-	-	-	Promoter (2-3kb)	7104266	7199891	95626	-	100577798	XM_026440400.1
NC_037648.1	12386725	12387607	12387146;12386922;12386996	262	127	216	90	313	105	161	153	156	123	110	103	16.7215	6.9824	10.1079	5.1688	16.1836	5.82682	8.85978	6.96234	7.98816	6.3364	5.62104	5.876	2.39481	1.95556	2.77743	1.27253	1.26068	0.95661	1.03031	0.0225968	1	+	+	+	-	-	-	Intron (XM_003250858.4/100577801, intron 1 of 7)	12408725	12414099	5375	+	100577801	XM_006566362.3
NC_037648.1	12374018	12374733	12374451;12374515;12374554	170	74	194	83	257	86	148	117	120	93	116	78	10.8722	4.09125	9.0831	4.7712	13.2973	4.78239	8.14881	5.33478	6.15648	4.8034	5.92488	4.4635	2.65743	1.90373	2.78047	1.52749	1.28169	1.32741	0.82766	0.0512797	1	+	+	+	-	-	-	Intron (XM_003250858.4/100577801, intron 1 of 7)	12360452	12414099	53648	+	100577801	XM_006566361.3
NC_037648.1	12274089	12274653	12274464;12274432;12274434	149	86	199	75	238	101	118	128	124	99	104	80	9.537	4.74585	9.316	4.3168	12.3181	5.60694	6.50811	5.83209	6.36	5.11	5.3172	4.5765	2.00955	2.15808	2.19694	1.11591	1.24462	1.16185	0.853511	0.000372746	1	+	+	+	-	-	-	Intron (XM_003250858.4/100577801, intron 1 of 7)	12238836	12414099	175264	+	100577801	XM_016914830.2
NC_037639.1	10710358	10711096	10710561;10710683;10710608	202	88	189	67	226	80	138	120	79	100	87	83	12.9067	4.85495	8.8502	3.8624	11.6996	4.45257	7.60191	5.47041	4.0704	5.1611	4.45632	4.746	2.65846	2.29137	2.62761	1.38964	0.788669	0.938963	1.28143	0.00396543	1	+	+	+	-	-	-	Distal Intergenic	10765455	10807157	41703	-	100577827	XM_026438846.1
NC_037643.1	6923314	6923931	6923518;6923705;6923488;6923800	175	110	211	70	230	80	101	110	97	90	93	84	11.1901	6.05505	9.87496	4.0328	11.9057	4.45257	5.57838	5.01831	4.98624	4.6501	4.76016	4.8025	1.84806	2.44866	2.67389	1.11161	1.07229	0.991184	1.1345	0.0336578	1	+	+	+	-	-	-	Intron (XM_026441238.1/100577936, intron 1 of 4)	6883786	6927801	44016	-	100577936	XM_026441238.1
NC_037653.1	859661	860094	859874;859877;859895	126	59	176	30	115	50	67	65	78	41	54	48	8.07466	3.273	8.24466	1.7608	5.97864	2.80347	3.71892	2.98386	4.01952	2.1462	2.7852	2.7685	2.46705	4.68234	2.13259	1.24635	1.87285	1.00603	1.16996	0.15532	1	+	+	+	-	-	-	Exon (XM_026445919.1/409228, exon 4 of 6)	866134	872967	6834	-	100577943	XM_026445920.1
NC_037640.1	2103233	2103658	2103425;2103438;2103455	110	73	130	55	131	73	94	67	82	57	45	61	7.05738	4.0367	6.10198	3.1808	6.80328	4.06778	5.19555	3.07428	4.22304	2.9638	2.32944	3.503	1.7483	1.91838	1.67248	1.69001	1.42487	0.664984	0.49828	0.228821	1	+	+	+	-	-	-	Intron (XM_016911285.2/100577932, intron 2 of 2)	2074332	2087001	12670	+	100577971	XR_003304228.1
NC_037647.1	10826059	10826867	10826224;10826659;10826601;10826661	222	121	209	78	254	114	140	112	129	137	130	110	14.1783	6.6551	9.7818	4.4872	13.1427	6.32155	7.71129	5.10873	6.6144	7.0518	6.63384	6.2715	2.13044	2.17993	2.07903	1.50943	0.937973	1.05778	0.866192	0.0284114	1	+	+	+	-	-	-	Intron (XM_003250771.4/100577980, intron 2 of 7)	10795067	10846321	51255	-	100577980	XM_003250771.4
NC_037651.1	2791718	2792214	2791984;2791949;2791973	122	91	170	60	175	59	80	90	93	86	91	71	7.82034	5.0186	7.96518	3.4648	9.07104	3.2982	4.42989	4.11411	4.78272	4.4457	4.65888	4.068	1.55827	2.29889	2.7503	1.07676	1.07581	1.14525	1.00259	0.085882	1	+	+	+	-	-	-	Promoter (1-2kb)	2782831	2793395	10565	-	100578067	XM_006559291.3
NC_037638.1	4701556	4702111	4701832;4701877;4701887	94	58	233	76	147	69	90	90	102	88	90	79	6.0401	3.21845	10.8997	4.3736	7.62792	3.8479	4.97679	4.11411	5.24064	4.5479	4.60824	4.52	1.87671	2.49216	1.98236	1.20969	1.15232	1.01952	0.909359	0.0269678	1	+	+	+	-	-	-	Distal Intergenic	4705147	4708759	3613	+	100578104	XR_003306334.1
NC_037638.1	4705130	4705593	4705370;4705357;4705360	104	71	159	61	137	60	66	94	73	71	52	52	6.6759	3.9276	7.4528	3.5216	7.11252	3.35317	3.66423	4.29495	3.76512	3.6792	2.68392	2.9945	1.69974	2.11631	2.12113	0.853148	1.02335	0.896283	1.09844	0.00993124	1	+	+	+	-	-	-	Promoter (<=1kb)	4705147	4708759	3613	+	100578104	XR_003306334.1
NC_037645.1	473515	473887	473692;473688;473696	83	46	129	47	104	43	54	39	52	35	22	53	5.34072	2.56385	6.0554	2.7264	5.4117	2.41868	3.00795	1.8084	2.69664	1.8396	1.16472	3.051	2.08309	2.22102	2.23746	1.66332	1.46588	0.38175	0.897773	0.124573	1	+	+	+	-	-	-	Exon (XM_026442017.1/406072, exon 7 of 16)	514607	515546	940	+	100578113	XM_003249034.4
NC_037648.1	13282513	13283034	13282782;13282789;13282885	119	68	119	66	148	96	83	87	67	99	90	94	7.6296	3.76395	5.5896	3.8056	7.67946	5.33209	4.59396	3.97848	3.45984	5.11	4.60824	5.3675	2.02702	1.46878	1.44023	1.1547	0.677072	0.858545	0.875576	0.0384663	1	+	+	+	-	-	-	Promoter (<=1kb)	13282909	13287504	4596	+	100578154	XR_120311.4
NC_037648.1	13283311	13283735	13283514;13283549;13283543	141	80	176	64	157	62	79	90	67	77	78	61	9.02836	4.41855	8.24466	3.692	8.14332	3.46311	4.3752	4.11411	3.45984	3.9858	4.00056	3.503	2.04329	2.23311	2.35145	1.06346	0.868042	1.14204	1.10864	0.000642508	1	+	+	+	-	-	-	Promoter (<=1kb)	13282909	13287504	4596	+	100578154	XR_120311.4
NC_037646.1	8241603	8242253	8241932;8241926;8241940	217	77	427	70	357	85	106	124	145	99	133	88	13.8604	4.2549	19.9362	4.0328	18.4513	4.72742	5.85183	5.65125	7.42848	5.11	6.78576	5.0285	3.25751	4.94351	3.90304	1.03549	1.45371	1.34946	1.65681	0.0244731	1	+	+	+	-	-	-	5' UTR	8236579	8245700	9122	+	100578227	XM_006561748.3
NC_037640.1	2826978	2827497	2827207;2827222;2827215	128	85	149	54	185	71	80	89	101	95	72	60	8.20182	4.6913	6.987	3.124	9.58644	3.95784	4.42989	4.0689	5.18976	4.9056	3.69672	3.4465	1.7483	2.23656	2.42214	1.08872	1.05793	1.0726	0.992926	0.033735	1	+	+	+	-	-	-	Promoter (2-3kb)	2824051	2831837	7787	+	100578261	XR_003304411.1
NC_037651.1	2160047	2160396	2160189;2160223;2160248	99	47	125	55	99	51	62	77	29	41	36	59	6.358	2.6184	5.86908	3.1808	5.154	2.85844	3.44547	3.52638	1.5264	2.1462	1.87368	3.39	2.4282	1.84516	1.80308	0.977056	0.711211	0.552708	1.4391	0.00953204	1	+	+	+	-	-	-	Intron (XR_001705518.2/100577945, intron 3 of 13)	2167048	2169518	2471	-	100578307	XM_016916162.2
NC_037651.1	2146725	2147274	2146981;2146994;2146963	210	79	512	49	404	55	77	72	77	79	69	33	13.4154	4.364	23.8955	2.84	20.8737	3.07832	4.26582	3.30033	3.96864	4.088	3.5448	1.921	3.07411	8.41391	6.78087	1.29254	0.970802	1.84529	2.15266	0.0925282	1	+	+	+	-	-	-	Intron (XR_001705518.2/100577945, intron 3 of 13)	2167048	2169518	2471	-	100578307	XM_016916162.2
NC_037651.1	2145682	2146123	2145892;2145901;2145934	138	63	164	38	110	50	40	77	40	52	35	66	8.83762	3.4912	7.6857	2.2152	5.72094	2.80347	2.24229	3.52638	2.08608	2.7083	1.82304	3.7855	2.5314	3.46953	2.04066	0.635862	0.770254	0.481585	2.09085	0.0350312	1	+	+	+	-	-	-	Intron (XR_001705518.2/100577945, intron 3 of 13)	2167048	2169518	2471	-	100578307	XM_016916162.2
NC_037645.1	2925856	2926319	2925966;2926025;2926072	118	74	130	59	123	71	105	107	56	106	44	63	7.56602	4.09125	6.10198	3.408	6.39096	3.95784	5.79714	4.88268	2.90016	5.4677	2.2788	3.616	1.84932	1.79049	1.61476	1.18729	0.530417	0.630199	1.1622	0.0309341	1	+	+	+	-	-	-	Distal Intergenic	2974041	3050843	76803	+	100578337	XM_016913438.2
NC_037640.1	2814038	2814524	2814229;2814334;2814339	111	45	124	49	111	77	83	98	66	54	59	52	7.12096	2.5093	5.8225	2.84	5.77248	4.28766	4.59396	4.47579	3.40896	2.8105	3.0384	2.9945	2.83783	2.05018	1.3463	1.0264	1.21294	1.01466	0.938015	0.144714	1	+	+	+	-	-	-	Promoter (<=1kb)	2813835	2817532	3698	+	100578353	XR_003304410.1
NC_037648.1	15536145	15538373	15536291;15537114;15537566;15536331;15536671;15536605;15536948;15537898;15538298	520	344	429	246	638	282	360	326	239	319	212	282	33.1252	18.8197	20.0294	14.0296	32.9341	15.5565	19.7431	14.7837	12.2112	16.352	10.7863	15.9895	1.76013	1.42765	2.11706	1.33546	0.746771	0.674586	0.944306	0.0425001	1	+	+	+	-	-	-	3' UTR	15530361	15532605	2245	+	100578413	XM_003251509.4
NC_037650.1	9367751	9368259	9367972;9368022;9367964	163	74	161	70	154	49	92	79	111	119	69	72	10.4271	4.09125	7.54596	4.0328	7.9887	2.7485	5.08617	3.6168	5.69856	6.132	3.5448	4.1245	2.54863	1.87115	2.90657	1.40626	0.929315	0.85945	1.19727	0.0263176	1	+	+	+	-	-	-	Intron (XM_016915971.2/100578423, intron 2 of 6)	9137697	9335231	197535	-	100578423	XM_016915974.2
NC_037650.1	9352435	9353111	9352556;9352580;9352973;9352599	159	85	151	86	152	71	122	118	100	91	66	86	10.1728	4.6913	7.08016	4.9416	7.88562	3.95784	6.72687	5.37999	5.13888	4.7012	3.39288	4.9155	2.16844	1.43277	1.9924	1.25035	1.0931	0.690241	0.882706	0.0409608	1	+	+	+	-	-	-	Intron (XM_016915971.2/100578423, intron 2 of 6)	9137697	9335231	197535	-	100578423	XM_016915974.2
NC_037650.1	4100982	4101502	4101215;4101137;4101333	141	104	150	80	136	76	115	104	81	53	59	73	9.02836	5.72775	7.03358	4.6008	7.06098	4.23269	6.34404	4.74705	4.17216	2.7594	3.0384	4.181	1.57625	1.52877	1.6682	1.33642	1.51198	0.726716	0.416975	0.232993	1	+	+	+	-	-	-	Distal Intergenic	4034000	4037601	3602	-	100578442	XM_003249428.4
NC_037643.1	8597080	8597949	8597311;8597814;8597350;8597284	207	167	217	112	307	139	173	153	150	157	119	115	13.2246	9.1644	10.1544	6.4184	15.8743	7.6958	9.51606	6.96234	7.68288	8.0738	6.0768	6.554	1.44304	1.58208	2.06272	1.36679	0.951582	0.92719	0.648585	0.064077	1	+	+	+	-	-	-	Intron (XR_003304787.1/100578461, intron 3 of 3)	8580705	8632385	51681	+	100578461	XR_001703459.2
NC_037653.1	6410626	6411189	6410747;6411006;6410960;6410955	160	110	176	83	204	94	113	85	92	91	63	70	10.2364	6.05505	8.24466	4.7712	10.5657	5.22215	6.23466	3.88806	4.73184	4.7012	3.24096	4.0115	1.69056	1.72801	2.02325	1.60354	1.00652	0.807917	0.670944	0.0892272	1	+	+	+	-	-	-	Intron (XR_120113.4/100578474, intron 1 of 2)	6402004	6455903	53900	+	100578474	XR_120113.4
NC_037648.1	1086991	1087381	1087164;1087226;1087236	114	67	139	38	123	68	112	100	111	80	80	52	7.3117	3.7094	6.5212	2.2152	6.39096	3.79293	6.17997	4.56621	5.69856	4.1391	4.10184	2.9945	1.97113	2.94384	1.68497	1.35341	1.37676	1.36979	0.68684	0.160203	1	+	+	+	-	-	-	Promoter (<=1kb)	1082662	1088117	5456	-	100578524	XR_407669.3
NC_037648.1	1096119	1096495	1096270;1096300;1096350	91	72	135	52	122	57	73	58	69	48	84	44	5.84936	3.98215	6.33488	3.0104	6.33942	3.18826	4.04706	2.66739	3.5616	2.5039	4.3044	2.5425	1.46889	2.10433	1.98836	1.51724	1.42242	1.69298	0.263664	0.249943	1	+	+	+	-	-	-	Promoter (<=1kb)	1082662	1097440	14779	-	100578524	XR_001704930.2
NC_037647.1	837337	837821	837593;837611;837546	117	43	157	51	83	34	62	108	66	67	39	48	7.50244	2.4002	7.35964	2.9536	4.32936	1.92395	3.44547	4.92789	3.40896	3.4748	2.0256	2.7685	3.12576	2.49175	2.25025	0.699178	0.981052	0.73166	1.70579	0.0127896	1	+	+	+	-	-	-	Promoter (<=1kb)	838225	840773	2549	+	100578555	XR_003305490.1
NC_037647.1	848294	848755	848501;848458;848542	130	87	138	59	149	70	112	92	74	68	57	84	8.32898	4.8004	6.47462	3.408	7.731	3.90287	6.17997	4.20453	3.816	3.5259	2.93712	4.8025	1.73506	1.89983	1.98085	1.46984	1.08228	0.611581	0.827866	0.0711095	1	+	+	+	-	-	-	Distal Intergenic	838225	841917	3693	+	100578555	XR_119736.4
NC_037638.1	443539	444626	443729;443696;444360;444312;444364	264	158	248	138	321	133	177	172	121	150	109	163	16.8487	8.67345	11.5984	7.8952	16.5959	7.36598	9.73482	7.82133	6.20736	7.7161	5.5704	9.266	1.94256	1.46904	2.25305	1.24465	0.804469	0.601166	1.09584	0.0290195	1	+	+	+	-	-	-	Promoter (1-2kb)	442753	446004	3252	-	100578571	XM_016910683.2
NC_037641.1	6984815	6985443	6985186;6985194;6984987	171	110	143	82	235	97	158	112	76	103	85	99	10.9358	6.05505	6.70752	4.7144	12.1634	5.38706	8.69571	5.10873	3.91776	5.3144	4.35504	5.65	1.80606	1.42277	2.25789	1.70213	0.737197	0.770804	0.773315	0.134018	1	+	+	+	-	-	-	Promoter (1-2kb)	6987179	7054578	67400	+	100578609	XM_026440404.1
NC_037639.1	15274050	15274491	15274254;15274280;15274303	79	42	161	64	89	42	34	71	54	57	25	53	5.0864	2.34565	7.54596	3.692	4.6386	2.36371	1.91415	3.25512	2.7984	2.9638	1.31664	3.051	2.16844	2.04387	1.96242	0.588043	0.944193	0.431544	1.65274	0.00551879	1	+	+	+	-	-	-	Promoter (<=1kb)	15275481	15277224	1744	+	100578614	XM_003251222.4
NC_037638.1	293977	294614	294355;294291;294351	176	114	163	85	216	92	105	102	96	148	64	107	11.2537	6.27325	7.63912	4.8848	11.1842	5.11221	5.79714	4.65663	4.93536	7.6139	3.2916	6.102	1.79392	1.56386	2.18774	1.24492	0.648204	0.53943	1.18885	0.023255	1	+	+	+	-	-	-	Intron (XM_026446225.1/551203, intron 30 of 53)	256975	270131	13157	-	100578621	XM_026446239.1
NC_037638.1	293200	293653	293379;293427;293447	152	60	133	70	143	74	92	96	65	65	56	56	9.72774	3.32755	6.24172	4.0328	7.42176	4.12275	5.08617	4.38537	3.35808	3.3726	2.88648	3.2205	2.92339	1.54774	1.8002	1.1598	0.995695	0.896283	1.03912	0.122138	1	+	+	+	-	-	-	Intron (XM_026446225.1/551203, intron 30 of 53)	256975	270131	13157	-	100578621	XM_026446239.1
NC_037647.1	1669549	1670010	1669782;1669818;1669846	113	66	144	47	101	42	79	86	86	78	57	67	7.24812	3.65485	6.7541	2.7264	5.25708	2.36371	4.3752	3.93327	4.42656	4.0369	2.93712	3.842	1.98315	2.4773	2.22408	1.11236	1.09652	0.764477	1.16873	0.00293768	1	+	+	+	-	-	-	Intron (XR_003305491.1/100578623, intron 1 of 2)	1657374	1693623	36250	-	100578623	XR_003305491.1
NC_037646.1	9504270	9505131	9504441;9504505;9504990;9504529	180	132	224	99	238	137	120	119	97	139	104	124	11.508	7.25515	10.4805	5.68	12.3181	7.58586	6.61749	5.4252	4.98624	7.154	5.3172	7.0625	1.58618	1.84516	1.62382	1.21977	0.696986	0.752878	0.921117	0.0245926	1	+	+	+	-	-	-	Promoter (<=1kb)	9503099	9505051	1953	-	100578625	XM_003249896.4
NC_037642.1	6436375	6436795	6436585;6436611;6436653	120	78	178	49	161	53	67	63	48	75	67	45	7.69318	4.30945	8.33782	2.84	8.34948	2.96838	3.71892	2.89344	2.49312	3.8836	3.44352	2.599	1.78519	2.93585	2.81281	1.28529	0.641961	1.32494	1.21197	0.0384272	1	+	+	+	-	-	-	Intron (XM_006562116.3/411079, intron 3 of 13)	6373663	6449862	76200	-	100578665	XM_026440938.1
NC_037640.1	5614432	5614767	5614578;5614623;5614609	128	55	124	55	115	52	80	74	68	58	45	50	8.20182	3.0548	5.8225	3.1808	5.97864	2.91341	4.42989	3.39075	3.51072	3.0149	2.32944	2.8815	2.6849	1.83051	2.05211	1.30646	1.16446	0.808412	1.00195	0.0305099	1	+	+	+	-	-	-	Intron (XM_026439340.1/551828, intron 3 of 15)	5629461	5635018	5558	+	100578670	XR_003304253.1
NC_037643.1	8295883	8296341	8296079;8296076;8296086	147	61	150	53	164	71	84	87	98	69	87	80	9.40984	3.3821	7.03358	3.0672	8.5041	3.95784	4.64865	3.97848	5.03712	3.577	4.45632	4.5765	2.78225	2.29316	2.14867	1.16845	1.4082	0.97374	1.02484	0.00888742	1	+	+	+	-	-	-	Distal Intergenic	8301029	8387592	86564	+	100578777	XR_003304812.1
NC_037647.1	1871761	1872499	1871925;1871892;1872194;1872038	166	101	146	94	188	75	141	110	107	123	65	117	10.6179	5.5641	6.84726	5.396	9.74106	4.17772	7.76598	5.01831	5.49504	6.3364	3.34224	6.667	1.90829	1.26895	2.33167	1.54753	0.867218	0.501311	0.917747	0.11798	1	+	+	+	-	-	-	Intron (XM_003249263.4/100578783, intron 3 of 3)	1832080	1906967	74888	-	100578783	XM_003249263.4
NC_037649.1	10939586	10940179	10939993;10939957;10940026	145	123	194	90	169	115	136	108	148	100	93	88	9.28268	6.7642	9.0831	5.1688	8.7618	6.37652	7.49253	4.92789	7.58112	5.1611	4.76016	5.0285	1.37232	1.75729	1.37407	1.52043	1.4689	0.946636	0.19439	0.450205	1	+	+	+	-	-	-	Intron (XM_016915510.2/100578818, intron 5 of 12)	10949939	10977339	27401	+	100578818	XM_016915511.2
NC_037649.1	10953435	10954117	10953871;10953928;10953659	210	112	198	119	242	98	144	116	72	103	84	95	13.4154	6.16415	9.26942	6.816	12.5242	5.44203	7.93005	5.28957	3.71424	5.3144	4.3044	5.424	2.17636	1.35995	2.30138	1.49919	0.698901	0.793584	0.964447	0.0725524	1	+	+	+	-	-	-	Intron (XM_016915510.2/100578818, intron 5 of 12)	10949939	10977339	27401	+	100578818	XM_016915511.2
NC_037647.1	7849278	7850208	7849443;7849682;7849761;7849589;7849615	228	139	290	117	177	129	116	146	85	112	66	119	14.5598	7.637	13.5548	6.7024	9.17412	7.1461	6.39873	6.64587	4.37568	5.7743	3.39288	6.78	1.90648	2.02238	1.28379	0.962813	0.757785	0.500425	1.23079	0.0291756	1	+	+	+	-	-	-	Intron (XM_026443217.1/100577759, intron 2 of 8)	7866641	7898007	31367	+	100578824	XM_003250427.4
NC_037647.1	7851204	7852102	7851341;7851853;7851893;7851887	269	127	391	115	243	154	190	166	118	136	111	152	17.1666	6.9824	18.2594	6.5888	12.5758	8.52035	10.4458	7.55007	6.05472	7.0007	5.67168	8.6445	2.45855	2.77128	1.47597	1.38354	0.864874	0.656103	1.20711	0.0626316	1	+	+	+	-	-	-	Intron (XM_026443217.1/100577759, intron 2 of 8)	7866641	7898007	31367	+	100578824	XM_003250427.4
NC_037647.1	7869570	7870004	7869738;7869740;7869743	121	65	130	71	148	63	89	80	71	70	69	51	7.75676	3.6003	6.10198	4.0896	7.67946	3.51808	4.9221	3.66201	3.66336	3.6281	3.5448	2.938	2.15448	1.49207	2.18286	1.3441	1.00972	1.20654	0.711329	0.0617706	1	+	+	+	-	-	-	Promoter (2-3kb)	7866641	7898007	31367	+	100578824	XM_003250427.4
NC_037647.1	7900552	7901862	7900679;7901203;7901568;7901608	271	169	307	173	290	172	213	219	160	188	119	167	17.2938	9.2735	14.3466	9.8832	14.9981	9.50981	11.7037	9.9462	8.19168	9.6579	6.0768	9.492	1.86486	1.45161	1.57712	1.1767	0.848184	0.640202	0.876712	0.0221447	1	+	+	+	-	-	-	Intron (XM_026443217.1/100577759, intron 2 of 8)	7866641	7898007	31367	+	100578824	XM_003250427.4
NC_037647.1	3753462	3753953	3753655;3753778;3753744	150	80	148	47	177	86	95	99	47	71	41	90	9.60058	4.41855	6.94042	2.7264	9.17412	4.78239	5.25024	4.521	2.44224	3.6792	2.12688	5.1415	2.17279	2.54564	1.91831	1.1613	0.663796	0.413669	1.56777	0.00745489	1	+	+	+	-	-	-	Distal Intergenic	3761704	3808914	47211	+	100578841	XR_001704687.2
NC_037651.1	5426107	5426651	5426324;5426276;5426311	108	79	132	55	164	80	88	72	55	108	69	92	6.93022	4.364	6.19514	3.1808	8.5041	4.45257	4.86741	3.30033	2.84928	5.5699	3.5448	5.2545	1.58804	1.94767	1.90993	1.47483	0.51155	0.674622	1.03314	0.0744723	1	+	+	+	-	-	-	Promoter (<=1kb)	5426393	5432666	6274	+	100578854	XM_026445140.1
NC_037642.1	10622831	10623226	10623040;10623126;10623074	104	57	113	49	167	60	90	76	97	79	61	71	6.6759	3.1639	5.31012	2.84	8.65872	3.35317	4.97679	3.48117	4.98624	4.088	3.13968	4.068	2.11002	1.86976	2.58225	1.42963	1.21973	0.771799	0.939658	0.0216274	1	+	+	+	-	-	-	Intron (XM_006567757.3/100578865, intron 1 of 5)	10475550	10599555	124006	-	100578865	XM_016912306.2
NC_037642.1	10620523	10620997	10620748;10620708;10620763	156	80	145	51	219	65	86	73	62	79	51	51	9.98206	4.41855	6.80068	2.9536	11.3388	3.62802	4.75803	3.34554	3.20544	4.088	2.63328	2.938	2.25913	2.30251	3.12534	1.4222	0.78411	0.896283	1.30894	0.0144948	1	+	+	+	-	-	-	Intron (XM_006567757.3/100578865, intron 1 of 5)	10475550	10599555	124006	-	100578865	XM_016912306.2
NC_037642.1	10606148	10606725	10606497;10606468;10606552	158	88	185	81	147	85	95	78	59	104	26	66	10.1092	4.85495	8.66388	4.6576	7.62792	4.72742	5.25024	3.57159	3.0528	5.3655	1.36728	3.7855	2.08225	1.86016	1.61355	1.47	0.568968	0.361189	1.21091	0.0751783	1	+	+	+	-	-	-	Intron (XM_006567757.3/100578865, intron 1 of 5)	10475550	10599555	124006	-	100578865	XM_016912306.2
NC_037642.1	10605398	10605908	10605586;10605639;10605621	154	93	192	60	139	64	107	133	48	78	62	102	9.8549	5.1277	8.98994	3.4648	7.2156	3.57305	5.90652	6.05814	2.49312	4.0369	3.19032	5.8195	1.92189	2.59465	2.01945	0.974973	0.617583	0.548212	1.61028	0.00692728	1	+	+	+	-	-	-	Intron (XM_006567757.3/100578865, intron 1 of 5)	10475550	10599555	124006	-	100578865	XM_016912306.2
NC_037642.1	10573478	10573891	10573676;10573676;10573662	116	71	136	63	135	61	95	95	73	57	44	66	7.43886	3.9276	6.38146	3.6352	7.00944	3.40814	5.25024	4.34016	3.76512	2.9638	2.2788	3.7855	1.894	1.75546	2.05668	1.20969	1.27037	0.601981	0.888629	0.0398093	1	+	+	+	-	-	-	Intron (XM_006567762.3/100578865, intron 1 of 4)	10475550	10584591	109042	-	100578865	XM_006567762.3
NC_037642.1	10642610	10643087	10642799;10642823;10642891	160	91	155	60	140	81	89	105	61	72	62	61	10.2364	5.0186	7.26648	3.4648	7.26714	4.50754	4.9221	4.79226	3.15456	3.7303	3.19032	3.503	2.03969	2.09723	1.61222	1.02709	0.845659	0.910739	1.04645	0.0150721	1	+	+	+	-	-	-	Intron (XM_006567757.3/100578865, intron 1 of 5)	10475550	10667934	192385	-	100578865	XM_006567757.3
NC_037638.1	22283754	22284332	22284088;22284107;22284127	136	97	150	86	174	89	123	100	84	122	84	123	8.71046	5.3459	7.03358	4.9416	9.0195	4.9473	6.78156	4.56621	4.3248	6.2853	4.3044	7.006	1.62937	1.42334	1.82312	1.48516	0.688082	0.614388	0.806608	0.115299	1	+	+	+	-	-	-	Intron (XR_003305153.1/100578882, intron 5 of 12)	22205067	22388608	183542	+	100578882	XR_003305145.1
NC_037638.1	22309202	22309754	22309367;22309469;22309616	162	93	150	61	161	80	126	104	81	97	71	86	10.3635	5.1277	7.03358	3.5216	8.34948	4.45257	6.94563	4.74705	4.17216	5.0078	3.64608	4.9155	2.02108	1.99727	1.8752	1.46315	0.833132	0.741752	0.956002	0.0475725	1	+	+	+	-	-	-	Intron (XR_003305153.1/100578882, intron 5 of 12)	22205067	22388608	183542	+	100578882	XR_003305145.1
NC_037640.1	8643486	8643821	8643622;8643661;8643698	83	52	115	62	92	28	56	53	71	54	56	61	5.34072	2.89115	5.40328	3.5784	4.79322	1.59413	3.11733	2.44134	3.66336	2.8105	2.88648	3.503	1.84726	1.50997	3.00679	1.27689	1.30345	0.824002	0.902561	0.151208	1	+	+	+	-	-	-	Distal Intergenic	8635100	8642941	7842	+	100578888	XM_003250317.4
NC_037639.1	15630457	15631625	15630613;15631020;15631398;15630825;15630937;15631396;15631340	306	162	304	140	345	101	195	178	162	158	136	176	19.5191	8.89165	14.2069	8.0088	17.8328	5.60694	10.7192	8.09259	8.29344	8.1249	6.93768	10.0005	2.19522	1.77391	3.18049	1.32457	1.02074	0.693733	1.23425	0.064178	1	+	+	+	-	-	-	Promoter (<=1kb)	15631219	15663863	32645	+	100578899	XM_026446351.1
NC_037640.1	8817626	8818572	8817897;8818370;8817956;8818373;8818395	214	123	344	96	178	110	90	125	148	129	125	106	13.6697	6.7642	16.0701	5.5096	9.22566	6.10167	4.97679	5.69646	7.58112	6.643	6.38064	6.0455	2.02089	2.91675	1.51199	0.873664	1.14122	1.05544	1.07083	0.10627	1	+	+	+	-	-	-	Distal Intergenic	8656849	8760447	103599	-	100578925	XM_016911501.2
NC_037640.1	8816838	8817333	8817031;8817080;8817108	240	42	218	56	236	57	70	58	59	66	52	71	15.3228	2.34565	10.201	3.2376	12.215	3.18826	3.88299	2.66739	3.0528	3.4237	2.68392	4.068	6.53243	3.15079	3.83124	1.45573	0.891667	0.659764	2.16803	0.0703539	1	+	+	+	-	-	-	Distal Intergenic	8656849	8760447	103599	-	100578925	XM_016911501.2
NC_037640.1	8812993	8813478	8813363;8813267;8813193	141	105	145	60	157	50	82	82	77	81	60	88	9.02836	5.7823	6.80068	3.4648	8.14332	2.80347	4.53927	3.75243	3.96864	4.1902	3.08904	5.0285	1.56138	1.96279	2.90473	1.20969	0.947124	0.614306	1.2141	0.0751773	1	+	+	+	-	-	-	Distal Intergenic	8656849	8760447	103599	-	100578925	XM_016911501.2
NC_037640.1	8811790	8812711	8812340;8811882;8812457;8812131;8812457	256	132	200	91	310	79	156	152	129	127	97	131	16.3401	7.25515	9.36258	5.2256	16.0289	4.3976	8.58633	6.91713	6.6144	6.5408	4.96272	7.458	2.25221	1.79168	3.64492	1.24131	1.01125	0.665422	1.39778	0.0935004	1	+	+	+	-	-	-	Distal Intergenic	8656849	8760447	103599	-	100578925	XM_016911501.2
NC_037648.1	15678546	15678902	15678716;15678729;15678719	103	62	128	46	123	39	74	35	90	45	70	36	6.61232	3.43665	6.00882	2.6696	6.39096	2.1988	4.10175	1.62756	4.63008	2.3506	3.59544	2.0905	1.92406	2.25083	2.90657	2.52018	1.96974	1.71989	0.189495	0.481413	1	+	+	+	-	-	-	Promoter (2-3kb)	15675668	15692569	16902	+	100578976	XM_016914795.2
NC_037641.1	3252969	3253447	3253169;3253195;3253224	118	84	143	69	141	88	85	106	76	67	62	67	7.56602	4.63675	6.70752	3.976	7.31868	4.89233	4.70334	4.83747	3.91776	3.4748	3.19032	3.842	1.63175	1.687	1.49595	0.972273	1.12748	0.83038	0.716482	0.00571433	1	+	+	+	-	-	-	Intron (XM_026440165.1/726761, intron 3 of 11)	3263427	3315759	52333	+	100578989	XM_016911979.2
NC_037639.1	9005701	9006027	9005815;9005838;9005873	88	74	129	62	97	46	81	67	48	57	44	74	5.65862	4.09125	6.0554	3.5784	5.05092	2.58359	4.48458	3.07428	2.49312	2.9638	2.2788	4.2375	1.3831	1.69221	1.955	1.45874	0.84119	0.53777	0.825925	0.0965467	1	+	+	+	-	-	-	Distal Intergenic	9021248	9021916	669	-	100579019	XM_006564701.3
NC_037639.1	8911968	8912824	8912223;8912156;8912516;8912223	191	135	218	111	250	137	134	152	143	152	89	132	12.2074	7.4188	10.201	6.3616	12.9365	7.58586	7.38315	6.91713	7.32672	7.8183	4.5576	7.5145	1.64547	1.60353	1.70534	1.06737	0.937124	0.606507	0.924088	0.0251714	1	+	+	+	-	-	-	Distal Intergenic	9021248	9021916	669	-	100579019	XM_006564701.3
NC_037639.1	8901977	8902418	8902152;8902198;8902127	127	63	122	64	111	70	86	95	54	80	49	48	8.13824	3.4912	5.72934	3.692	5.77248	3.90287	4.75803	4.34016	2.7984	4.1391	2.532	2.7685	2.33107	1.55183	1.47903	1.09628	0.676089	0.914575	0.996787	0.0645892	1	+	+	+	-	-	-	Distal Intergenic	9021248	9021916	669	-	100579019	XM_006564701.3
NC_037639.1	8888655	8889267	8888886;8888891;8888953	144	116	162	62	190	90	127	125	75	111	50	81	9.2191	6.38235	7.59254	3.5784	9.84414	5.00227	7.00032	5.69646	3.86688	5.7232	2.58264	4.633	1.44447	2.12177	1.96793	1.22889	0.67565	0.557444	1.16855	0.0245509	1	+	+	+	-	-	-	Distal Intergenic	9021248	9021916	669	-	100579019	XM_006564701.3
NC_037638.1	7350644	7351003	7350793;7350883;7350848	89	68	98	45	95	41	51	77	40	49	45	63	5.7222	3.76395	4.61142	2.6128	4.94784	2.30874	2.84388	3.52638	2.08608	2.555	2.32944	3.616	1.52026	1.76493	2.14309	0.806459	0.81647	0.644204	1.25963	0.0207112	1	+	+	+	-	-	-	Intron (XM_026444616.1/113219185, intron 3 of 4)	7234664	7234686	23	+	100629012	100629012
NC_037638.1	7353197	7353782	7353479;7353387;7353449	146	108	231	65	150	91	57	81	69	83	69	79	9.34626	5.94595	10.8066	3.7488	7.78254	5.05724	3.17202	3.70722	3.5616	4.2924	3.5448	4.52	1.57187	2.88268	1.53889	0.855633	0.829746	0.784248	1.27909	0.117134	1	+	+	+	-	-	-	Intron (XM_026444616.1/113219185, intron 3 of 4)	7234664	7234686	23	+	100629012	100629012
NC_037638.1	7395696	7396324	7396136;7396146;7396153	158	101	232	82	172	95	65	93	40	75	45	105	10.1092	5.5641	10.8531	4.7144	8.91642	5.27712	3.60954	4.24974	2.08608	3.8836	2.32944	5.989	1.81686	2.30212	1.68964	0.849355	0.537151	0.388953	1.71	0.00570111	1	+	+	+	-	-	-	Intron (XM_026444616.1/113219185, intron 3 of 4)	7234664	7234686	23	+	100629012	100629012
NC_037640.1	8908005	8908422	8908197;8908187;8908185;8908388	98	52	126	54	135	48	74	80	96	59	66	45	6.29442	2.89115	5.91566	3.124	7.00944	2.69353	4.10175	3.66201	4.93536	3.066	3.39288	2.599	2.17713	1.89362	2.60232	1.12008	1.60971	1.30546	0.725696	0.0298233	1	+	+	+	-	-	-	Promoter (1-2kb)	8906939	8906959	21	+	100629016	100629016
NC_037653.1	3241016	3242580	3241264;3241765;3241313;3241759;3242122;3241287;3241772;3242208	359	171	556	160	688	205	164	223	180	183	143	172	22.8888	9.3826	25.9451	9.1448	35.5111	11.3238	9.02385	10.127	9.20928	9.4024	7.29216	9.7745	2.43949	2.83714	3.13597	0.891068	0.979461	0.746039	1.68488	0.00606005	1	+	+	+	-	-	-	Distal Intergenic	3228923	3229060	138	-	100629033	NR_039502.1
NC_037642.1	2075210	2075686	2075524;2075526;2075437	95	85	107	53	133	72	79	83	74	89	44	59	6.10368	4.6913	5.03064	3.0672	6.90636	4.01281	4.3752	3.79764	3.816	4.599	2.2788	3.39	1.30106	1.64014	1.72108	1.15208	0.829746	0.672212	0.812845	0.025155	1	+	+	+	-	-	-	Intron (XR_407617.3/102655600, intron 2 of 3)	2045714	2045800	87	-	100629042	NR_039516.1
NC_037642.1	2056821	2057306	2057038;2057056;2057107	173	67	142	57	178	78	89	78	67	81	65	57	11.0629	3.7094	6.66094	3.2944	9.22566	4.34263	4.9221	3.57159	3.45984	4.1902	3.34224	3.277	2.9824	2.0219	2.12444	1.37813	0.825698	1.01991	1.14491	0.0317131	1	+	+	+	-	-	-	Intron (XR_407617.3/102655600, intron 2 of 3)	2045714	2045800	87	-	100629042	NR_039516.1
NC_037638.1	17136011	17136549	17136295;17136270;17136204	173	68	164	83	248	74	105	96	71	73	44	88	11.0629	3.76395	7.6857	4.7712	12.8335	4.12275	5.79714	4.38537	3.66336	3.7814	2.2788	5.0285	2.93917	1.61085	3.11285	1.32193	0.968784	0.453177	1.48166	0.0542317	1	+	+	+	-	-	-	Intron (XR_003304353.1/113218641, intron 1 of 2)	17151349	17151371	23	-	100629067	100629067
NC_037638.1	957553	958021	957805;957778;957823	156	78	165	72	241	89	106	91	79	74	65	66	9.98206	4.30945	7.73228	4.1464	12.4727	4.9473	5.85183	4.15932	4.0704	3.8325	3.34224	3.7855	2.31632	1.86482	2.52111	1.40692	1.06207	0.882906	0.999666	0.012031	1	+	+	+	-	-	-	Intron (XR_407453.3/410767, intron 3 of 9)	918983	919003	21	+	100629079	100629079
NC_037640.1	3470078	3470652	3470248;3470476;3470250;3470361	141	76	138	71	189	74	73	123	53	75	53	86	9.02836	4.20035	6.47462	4.0896	9.7926	4.12275	4.04706	5.60604	2.74752	3.8836	2.73456	4.9155	2.14943	1.58319	2.37526	0.721911	0.707467	0.556314	1.62103	0.0236254	1	+	+	+	-	-	-	Intron (XM_006558377.3/408758, intron 1 of 7)	3474283	3474304	22	-	100629085	100629085
NC_037638.1	1182828	1183444	1183002;1183021;1183320;1183082;1183310	141	107	187	88	174	84	136	121	96	121	75	88	9.02836	5.8914	8.75704	5.0552	9.0195	4.67245	7.49253	5.51562	4.93536	6.2342	3.84864	5.0285	1.53246	1.73228	1.93036	1.35842	0.791659	0.765365	0.833437	0.0381857	1	+	+	+	-	-	-	Intron (XM_016917650.2/726912, intron 1 of 7)	1179500	1179618	119	-	100629094	NR_039430.1
NC_037648.1	11971515	11971988	11971676;11971696;11971776	115	84	113	50	111	52	75	86	75	98	59	74	7.37528	4.63675	5.31012	2.8968	5.77248	2.91341	4.15644	3.93327	3.86688	5.0589	3.0384	4.2375	1.59061	1.8331	1.98135	1.05674	0.764372	0.717027	1.09054	0.00363205	1	+	+	+	-	-	-	Intron (XM_006566322.3/410320, intron 11 of 14)	11967908	11967932	25	+	100629097	100629097
NC_037638.1	23801436	23802208	23801552;23802034;23801639;23802009	196	147	181	89	198	115	118	123	102	143	76	105	12.5253	8.0734	8.47756	5.112	10.2565	6.37652	6.50811	5.60604	5.24064	7.3584	3.89928	5.989	1.55143	1.65836	1.60848	1.16091	0.712198	0.651074	0.9327	0.0373421	1	+	+	+	-	-	-	Promoter (1-2kb)	23800248	23803572	3325	+	101664701	NM_001278334.1
NC_037648.1	1925644	1926192	1925880;1925837;1925793;1926069	134	79	192	58	160	74	114	102	77	106	63	70	8.5833	4.364	8.98994	3.3512	8.29794	4.12275	6.28935	4.65663	3.96864	5.4677	3.24096	4.0115	1.96684	2.6826	2.01272	1.35062	0.725834	0.807917	1.20773	0.0150267	1	+	+	+	-	-	-	Distal Intergenic	1902032	1903989	1958	-	102653574	XR_003305637.1
NC_037638.1	8686133	8686533	8686279;8686324;8686339	105	56	161	45	114	45	84	67	77	59	64	44	6.73948	3.10935	7.54596	2.6128	5.9271	2.52862	4.64865	3.07428	3.96864	3.066	3.2916	2.5425	2.16749	2.88807	2.34401	1.51211	1.2944	1.29463	0.851415	0.0269941	1	+	+	+	-	-	-	Intron (XM_026443702.1/410732, intron 2 of 5)	8701274	8724074	22801	+	102653666	XR_003305617.1
NC_037646.1	7427231	7427652	7427438;7427457;7427454	119	57	168	47	145	54	75	79	86	71	82	65	7.6296	3.1639	7.87202	2.7264	7.52484	3.02335	4.15644	3.6168	4.42656	3.6792	4.20312	3.729	2.41145	2.88733	2.48891	1.1492	1.20313	1.12714	1.16232	0.00912407	1	+	+	+	-	-	-	Intron (XM_006561550.3/409227, intron 2 of 6)	7431677	7446973	15297	+	102653672	XR_409172.3
NC_037638.1	16751624	16753724	16751749;16752168;16752651;16753250;16753560;16751757;16751991;16752654;16753063;16752173;16752656;16753100	598	326	660	273	640	272	335	316	190	315	139	240	38.0844	17.8378	30.7894	15.5632	33.0371	15.0068	18.3758	14.3316	9.71808	16.1476	7.0896	13.6165	2.13504	1.97835	2.20148	1.28219	0.601828	0.520662	1.39291	0.0258475	1	+	+	+	-	-	-	Promoter (<=1kb)	16749603	16754630	5028	-	102653680	XM_006571013.3
NC_037638.1	16749242	16750485	16749484;16750074;16750257;16750295	288	197	420	128	252	149	95	187	91	172	72	166	18.3746	10.8009	19.6102	7.3272	13.0396	8.2455	5.25024	8.49948	4.68096	8.8403	3.69672	9.4355	1.70121	2.67636	1.58142	0.617713	0.529502	0.391788	1.95307	0.0468425	1	+	+	+	-	-	-	3' UTR	16749603	16754630	5028	-	102653680	XM_006571013.3
NC_037648.1	2082049	2082439	2082133;2082298;2082258	113	97	104	55	96	64	79	64	48	55	49	71	7.24812	5.3459	4.8909	3.1808	4.99938	3.57305	4.3752	2.93865	2.49312	2.8616	2.532	4.068	1.35583	1.53763	1.39919	1.48885	0.871233	0.622419	0.525347	0.228718	1	+	+	+	-	-	-	Distal Intergenic	2076564	2078832	2269	+	102653728	XR_408124.3
NC_037648.1	2110763	2111269	2111119;2111005;2111085	119	55	97	38	127	74	81	70	58	72	46	75	7.6296	3.0548	4.56484	2.2152	6.59712	4.12275	4.48458	3.20991	3.00192	3.7303	2.38008	4.294	2.49758	2.06069	1.60017	1.3971	0.80474	0.55428	1.15992	0.0345544	1	+	+	+	-	-	-	Distal Intergenic	2076564	2078832	2269	+	102653728	XR_408124.3
NC_037648.1	2117644	2118331	2117820;2118106;2118073;2118098	230	135	227	97	210	99	141	146	113	127	70	125	14.687	7.4188	10.6202	5.5664	10.8749	5.497	7.76598	6.64587	5.80032	6.5408	3.59544	7.119	1.9797	1.90791	1.97833	1.16854	0.886791	0.505048	1.196	0.0275932	1	+	+	+	-	-	-	Distal Intergenic	2076564	2078832	2269	+	102653728	XR_408124.3
NC_037648.1	2122205	2122666	2122453;2122378;2122450	110	93	168	49	127	68	69	67	34	48	42	47	7.05738	5.1277	7.87202	2.84	6.59712	3.79293	3.8283	3.07428	1.7808	2.5039	2.17752	2.712	1.37632	2.77184	1.73932	1.24527	0.711211	0.80292	1.0933	0.116186	1	+	+	+	-	-	-	Distal Intergenic	2076564	2078832	2269	+	102653728	XR_408124.3
NC_037648.1	2123148	2123549	2123276;2123326;2123325	113	79	110	59	107	63	79	72	58	50	51	69	7.24812	4.364	5.17038	3.408	5.56632	3.51808	4.3752	3.30033	3.00192	2.6061	2.63328	3.955	1.66089	1.51713	1.5822	1.32569	1.15188	0.66581	0.598713	0.106378	1	+	+	+	-	-	-	Distal Intergenic	2076564	2078832	2269	+	102653728	XR_408124.3
NC_037640.1	3569731	3570531	3569956;3570432;3569935;3569972	204	86	171	94	175	105	125	151	81	131	55	125	13.0339	4.74585	8.01176	5.396	9.07104	5.82682	6.89094	6.87192	4.17216	6.7452	2.83584	7.119	2.74638	1.48476	1.55677	1.00277	0.618538	0.398348	1.51893	0.0747896	1	+	+	+	-	-	-	3' UTR	3553419	3554570	1152	+	102653804	XR_003304367.1
NC_037646.1	10083647	10084502	10083789;10084218;10083805;10084286;10083904;10084362	187	115	236	108	258	104	192	155	100	123	94	101	11.953	6.3278	11.0395	6.1912	13.3489	5.77185	10.5552	7.05276	5.13888	6.3364	4.8108	5.763	1.88897	1.7831	2.31276	1.49661	0.811009	0.834774	0.929446	0.0310578	1	+	+	+	-	-	-	Promoter (<=1kb)	10084283	10086535	2253	+	102653835	XM_006561875.3
NC_037652.1	6422217	6422626	6422421;6422391;6422398	147	78	128	60	152	90	30	62	41	65	43	80	9.40984	4.30945	6.00882	3.4648	7.88562	5.00227	1.69539	2.84823	2.13696	3.3726	2.22816	4.5765	2.18354	1.73425	1.57641	0.595243	0.633624	0.48687	1.67908	0.0159552	1	+	+	+	-	-	-	Intron (XM_006563432.3/726458, intron 4 of 8)	6428354	6430526	2173	+	102653894	XM_006563431.3
NC_037638.1	4442024	4442373	4442170;4442206;4442220	93	58	97	53	96	44	48	64	44	49	47	45	5.97652	3.21845	4.56484	3.0672	4.99938	2.47365	2.67981	2.93865	2.2896	2.555	2.43072	2.599	1.85696	1.48828	2.02105	0.911919	0.896125	0.935252	0.968014	0.0304096	1	+	+	+	-	-	-	Promoter (1-2kb)	4440892	4444809	3918	+	102653920	XM_006561918.3
NC_037638.1	12875988	12876424	12876177;12876253;12876247	92	66	107	54	111	37	83	101	53	84	77	82	5.91294	3.65485	5.03064	3.124	5.77248	2.08886	4.59396	4.61142	2.74752	4.3435	3.94992	4.6895	1.61783	1.61032	2.76346	0.996214	0.632559	0.84229	1.27781	0.0829319	1	+	+	+	-	-	-	Intron (XM_026445379.1/410718, intron 6 of 22)	12827491	12829992	2502	-	102653997	XR_003306136.1
NC_037646.1	10105226	10107034	10105358;10105682;10105938;10106417;10106663;10106060;10105967;10106667	366	259	326	183	505	264	288	296	197	327	140	256	23.3339	14.183	15.2317	10.4512	26.0792	14.5671	15.8054	13.4274	10.0742	16.7608	7.14024	14.5205	1.6452	1.45741	1.79028	1.1771	0.601057	0.491735	1.10806	0.0376124	1	+	+	+	-	-	-	Promoter (2-3kb)	10109938	10113163	3226	+	102654008	XM_006561879.3
NC_037638.1	530888	531571	531106;531273;531263	166	114	172	69	246	105	128	122	87	110	78	79	10.6179	6.27325	8.05834	3.976	12.7304	5.82682	7.05501	5.56083	4.47744	5.6721	4.00056	4.52	1.69257	2.02675	2.18479	1.2687	0.78938	0.88508	1.00435	0.00872906	1	+	+	+	-	-	-	Distal Intergenic	558075	560102	2028	+	102654047	XM_006557374.3
NC_037638.1	555149	557218	555595;555984;556442;556957;555739;556506;556061;557022;557048	481	251	474	229	648	243	353	309	249	277	195	241	30.6456	13.7466	22.1255	13.064	33.4495	13.4127	19.3603	14.0151	12.72	14.2058	9.92544	13.673	2.22932	1.69362	2.49387	1.38139	0.895409	0.725915	1.09559	0.021802	1	+	+	+	-	-	-	Promoter (<=1kb)	558075	560102	2028	+	102654047	XM_006557374.3
NC_037638.1	559699	560864	559879;560139;560625;559929;560640;560684	240	199	333	131	398	150	223	196	156	116	126	186	15.3228	10.91	15.5577	7.4976	20.5645	8.30047	12.2506	8.90637	7.98816	5.9787	6.43128	10.5655	1.40447	2.07502	2.47751	1.37549	1.3361	0.608706	0.843276	0.0963961	1	+	+	+	-	-	-	Promoter (1-2kb)	558075	560102	2028	+	102654047	XM_006557374.3
NC_037638.1	562221	562926	562363;562782;562581;562786	182	93	174	98	167	92	144	120	85	122	67	113	11.6351	5.1277	8.1515	5.6232	8.65872	5.11221	7.93005	5.47041	4.37568	6.2853	3.44352	6.441	2.26907	1.44962	1.69373	1.44963	0.696177	0.534625	1.01381	0.0720633	1	+	+	+	-	-	-	Distal Intergenic	558075	560102	2028	+	102654047	XM_006557374.3
NC_037638.1	599707	600809	599904;599850;600344;600373;600441	264	168	283	142	370	146	209	164	164	183	114	146	16.8487	9.21895	13.2287	8.1224	19.1213	8.08059	11.4849	7.45965	8.3952	9.4024	5.8236	8.3055	1.82762	1.62867	2.36632	1.5396	0.892878	0.701174	0.893819	0.05708	1	+	+	+	-	-	-	Distal Intergenic	558075	560102	2028	+	102654047	XM_006557374.3
NC_037638.1	607463	607920	607691;607676;607646	159	102	148	77	246	80	87	76	65	74	60	86	10.1728	5.61865	6.94042	4.4304	12.7304	4.45257	4.81272	3.48117	3.35808	3.8325	3.08904	4.9155	1.81054	1.56654	2.85911	1.3825	0.876211	0.628428	1.11103	0.0872951	1	+	+	+	-	-	-	Distal Intergenic	558075	560102	2028	+	102654047	XM_006557374.3
NC_037638.1	608090	608749	608497;608354;608316	211	123	197	104	423	133	126	115	124	88	91	90	13.479	6.7642	9.22284	5.964	21.853	7.36598	6.94563	5.24436	6.36	4.5479	4.65888	5.1415	1.9927	1.54642	2.96675	1.3244	1.39845	0.906132	0.842176	0.137756	1	+	+	+	-	-	-	Distal Intergenic	558075	560102	2028	+	102654047	XM_006557374.3
NC_037647.1	2871455	2872221	2871618;2872067;2871669;2872020;2871715;2872072	205	116	243	98	219	94	121	135	90	160	72	127	13.0975	6.38235	11.3655	5.6232	11.3388	5.22215	6.67218	6.14856	4.63008	8.2271	3.69672	7.232	2.05214	2.02118	2.17129	1.08516	0.562784	0.511162	1.53218	0.0134994	1	+	+	+	-	-	-	Exon (XR_001704531.2/102654050, exon 5 of 5)	2862433	2872503	10071	+	102654050	XR_003305504.1
NC_037650.1	5895344	5895785	5895526;5895518;5895543	106	72	175	69	149	79	91	85	90	91	82	57	6.80306	3.98215	8.19808	3.976	7.731	4.3976	5.03148	3.88806	4.63008	4.7012	4.20312	3.277	1.70839	2.06189	1.758	1.29408	0.984872	1.28261	0.634319	0.0121251	1	+	+	+	-	-	-	Exon (XM_026444852.1/100578957, exon 5 of 6)	5822981	5903068	80088	-	102654051	XR_003306006.1
NC_037650.1	5894563	5895065	5894740;5894777;5894853	148	64	171	83	183	57	70	80	63	94	48	79	9.47342	3.54575	8.01176	4.7712	9.48336	3.18826	3.88299	3.66201	3.25632	4.8545	2.48136	4.52	2.67177	1.67919	2.97446	1.06034	0.670784	0.548973	1.68381	0.036213	1	+	+	+	-	-	-	Intron (XM_026444852.1/100578957, intron 4 of 5)	5822981	5903068	80088	-	102654051	XR_003306006.1
NC_037647.1	7827534	7827938	7827735;7827798;7827844	102	65	120	65	114	68	66	76	48	67	43	47	6.54874	3.6003	5.63618	3.7488	5.9271	3.79293	3.66423	3.48117	2.49312	3.4748	2.22816	2.712	1.81894	1.50346	1.56267	1.05259	0.717486	0.821593	0.914502	0.00526552	1	+	+	+	-	-	-	Intron (XM_026443217.1/100577759, intron 2 of 8)	7812313	7813973	1661	+	102654086	XM_006564465.3
NC_037648.1	2191039	2191694	2191278;2191117;2191540;2191367	169	84	187	75	177	86	147	125	92	102	92	117	10.8086	4.63675	8.75704	4.3168	9.17412	4.78239	8.09412	5.69646	4.73184	5.2633	4.70952	6.667	2.33107	2.0286	1.91831	1.4209	0.899025	0.706393	1.05274	0.0190194	1	+	+	+	-	-	-	Distal Intergenic	2216855	2218468	1614	-	102654106	XR_003305704.1
NC_037639.1	4270181	4270724	4270300;4270584;4270479;4270491	132	70	163	76	152	51	112	112	123	77	79	64	8.45614	3.87305	7.63912	4.3736	7.88562	2.85844	6.17997	5.10873	6.30912	3.9858	4.0512	3.6725	2.18333	1.74664	2.75871	1.20969	1.5829	1.10312	0.779838	0.0672185	1	+	+	+	-	-	-	Intron (XM_006559125.3/724736, intron 3 of 15)	4275288	4281848	6561	+	102654107	XR_003304173.1
NC_037641.1	5079583	5080403	5079815;5080199;5079857;5079842	228	106	283	89	347	113	116	112	84	107	101	105	14.5598	5.83685	13.2287	5.112	17.9359	6.26658	6.39873	5.10873	4.3248	5.5188	5.16528	5.989	2.49446	2.58777	2.86215	1.25251	0.783649	0.862461	1.45457	0.00105044	1	+	+	+	-	-	-	Promoter (1-2kb)	5077992	5084745	6754	+	102654156	XR_408775.3
NC_037647.1	2968584	2969154	2968887;2968784;2968818	130	104	242	70	138	92	92	95	110	113	100	104	8.32898	5.72775	11.3189	4.0328	7.16406	5.11221	5.08617	4.34016	5.64768	5.8254	5.11464	5.9325	1.45415	2.80671	1.40136	1.17189	0.969492	0.862139	0.914715	0.190001	1	+	+	+	-	-	-	Distal Intergenic	2940151	2949318	9168	+	102654285	XR_003305506.1
NC_037647.1	2969503	2970004	2969706;2969731;2969753	132	85	237	58	171	96	101	103	71	73	38	72	8.45614	4.6913	11.086	3.3512	8.86488	5.33209	5.57838	4.70184	3.66336	3.7814	1.97496	4.1245	1.80252	3.30807	1.66255	1.18642	0.968784	0.478836	1.36254	0.105525	1	+	+	+	-	-	-	Distal Intergenic	2940151	2949318	9168	+	102654285	XR_003305506.1
NC_037639.1	8756139	8756523	8756295;8756344;8756381	109	61	111	54	135	65	114	86	57	84	69	57	6.9938	3.3821	5.21696	3.124	7.00944	3.62802	6.28935	3.93327	2.95104	4.3435	3.5448	3.277	2.06789	1.66996	1.93203	1.59901	0.679415	1.08172	0.754792	0.0847087	1	+	+	+	-	-	-	Intron (XR_003304184.1/102654348, intron 2 of 3)	8747173	8763032	15860	+	102654348	XR_003304184.1
NC_037639.1	8765560	8766809	8766098;8766090;8766740;8766086	274	218	282	161	379	152	222	198	195	156	120	179	17.4845	11.9465	13.1821	9.2016	19.5852	8.41041	12.1959	8.99679	9.97248	8.0227	6.12744	10.17	1.46357	1.43259	2.32869	1.35558	1.24303	0.602501	0.706811	0.150606	1	+	+	+	-	-	-	Distal Intergenic	8747173	8763032	15860	+	102654348	XR_003304184.1
NC_037638.1	22935547	22935977	22935695;22935730;22935780	142	72	139	45	125	58	92	97	49	68	37	66	9.09194	3.98215	6.5212	2.6128	6.49404	3.24323	5.08617	4.43058	2.544	3.5259	1.92432	3.7855	2.28317	2.49587	2.00234	1.14797	0.721518	0.50834	1.51193	0.00427867	1	+	+	+	-	-	-	Intron (XM_026446142.1/410662, intron 4 of 8)	22963173	22969721	6549	+	102654353	XM_006571319.3
NC_037638.1	16932785	16933299	16932912;16933026;16933091	137	82	136	64	143	79	126	91	88	88	65	62	8.77404	4.52765	6.38146	3.692	7.42176	4.3976	6.94563	4.15932	4.52832	4.5479	3.34224	3.5595	1.93788	1.72846	1.68768	1.6699	0.995695	0.938963	0.570802	0.119765	1	+	+	+	-	-	-	Distal Intergenic	16917497	16919579	2083	-	102654380	XM_016917961.2
NC_037638.1	12690306	12690869	12690546;12690537;12690566	157	67	193	82	156	76	99	110	110	80	79	80	10.0456	3.7094	9.03652	4.7144	8.09178	4.23269	5.469	5.01831	5.64768	4.1391	4.0512	4.5765	2.70815	1.91679	1.91173	1.08981	1.36447	0.885218	0.968925	0.0371835	1	+	+	+	-	-	-	Intron (XM_026445379.1/410718, intron 2 of 22)	12682647	12685222	2576	-	102654418	XR_411776.3
NC_037649.1	2079486	2080167	2079715;2079794;2079884	144	83	256	89	216	80	84	89	73	108	42	69	9.2191	4.5822	11.9711	5.112	11.1842	4.45257	4.64865	4.0689	3.76512	5.5699	2.17752	3.955	2.01194	2.34176	2.51185	1.14248	0.675976	0.550574	1.53508	0.00340453	1	+	+	+	-	-	-	Promoter (1-2kb)	2081730	2083338	1609	+	102654437	XR_408266.3
NC_037641.1	3091076	3091603	3091263;3091258;3091338	149	82	131	84	177	95	122	112	97	80	80	68	9.537	4.52765	6.14856	4.828	9.17412	5.27712	6.72687	5.10873	4.98624	4.1391	4.10184	3.8985	2.10639	1.27352	1.73847	1.31674	1.20467	1.05216	0.518323	0.156941	1	+	+	+	-	-	-	Intron (XM_006558737.3/102654533, intron 3 of 3)	2979556	3128993	149438	-	102654533	XM_006558737.3
NC_037643.1	3581861	3582730	3581990;3582462;3582091;3582291;3582671;3582318;3582589	224	135	190	99	260	122	115	123	100	170	53	123	14.3055	7.4188	8.89678	5.68	13.4519	6.76131	6.34404	5.60604	5.13888	8.7381	2.73456	7.006	1.92828	1.56633	1.98954	1.13164	0.5881	0.390317	1.37798	0.0187507	1	+	+	+	-	-	-	Promoter (1-2kb)	3580779	3583759	2981	+	102654534	XM_006560040.3
NC_037649.1	741514	741872	741685;741686;741742	133	54	135	54	112	55	48	79	37	56	26	56	8.51972	3.00025	6.33488	3.124	5.82402	3.07832	2.67981	3.6168	1.93344	2.9127	1.36728	3.2205	2.83967	2.02781	1.89195	0.740934	0.663796	0.424555	1.88562	0.0224263	1	+	+	+	-	-	-	Promoter (<=1kb)	737249	741635	4387	-	102654686	XR_407740.3
NC_037649.1	740901	741256	741071;741045;741089	88	31	145	69	120	56	47	76	59	75	27	44	5.65862	1.7456	6.80068	3.976	6.23634	3.13329	2.62512	3.48117	3.0528	3.8836	1.41792	2.5425	3.24165	1.71043	1.99035	0.754091	0.786075	0.557687	1.72653	0.0723324	1	+	+	+	-	-	-	Promoter (<=1kb)	737249	741635	4387	-	102654686	XR_407740.3
NC_037650.1	6517420	6518132	6517551;6517666;6517627	147	89	213	101	213	95	108	106	74	120	55	71	9.40984	4.9095	9.96812	5.7936	11.0296	5.27712	5.96121	4.83747	3.816	6.1831	2.83584	4.068	1.91666	1.72054	2.09008	1.2323	0.617166	0.697109	1.16929	0.0156997	1	+	+	+	-	-	-	3' UTR	6554701	6568903	14203	-	102654690	XR_001705368.2
NC_037650.1	2622060	2623031	2622354;2622858;2622251;2622761;2622839	215	105	288	113	197	121	171	164	152	118	100	96	13.7333	5.7823	13.4616	6.4752	10.2049	6.70634	9.40668	7.45965	7.78464	6.0809	5.11464	5.4805	2.37506	2.07895	1.52168	1.26101	1.28018	0.933243	0.782328	0.0617279	1	+	+	+	-	-	-	Distal Intergenic	2611215	2614356	3142	+	102654730	XR_003305939.1
NC_037647.1	11253984	11254351	11254199;11254116;11254135	92	51	103	37	96	47	73	60	51	64	56	40	5.91294	2.8366	4.84432	2.1584	4.99938	2.63856	4.04706	2.75781	2.64576	3.3215	2.88648	2.3165	2.08452	2.2444	1.89474	1.46749	0.796556	1.24605	0.826251	0.0269254	1	+	+	+	-	-	-	Intron (XM_026443212.1/408277, intron 1 of 5)	11259204	11260326	1123	+	102654741	XR_411426.3
NC_037641.1	3878374	3878848	3878529;3878635;3878664	171	90	183	73	152	73	71	76	61	79	59	89	10.9358	4.96405	8.57072	4.2032	7.88562	4.06778	3.93768	3.48117	3.15456	4.088	3.0384	5.085	2.203	2.03909	1.93856	1.13114	0.771663	0.597522	1.30564	0.0065808	1	+	+	+	-	-	-	Intron (XM_006558675.3/102654745, intron 1 of 2)	3814792	3884414	69623	-	102654745	XR_003304505.1
NC_037641.1	3873094	3873527	3873236;3873235;3873347	133	81	121	60	149	69	96	85	49	99	40	53	8.51972	4.4731	5.68276	3.4648	7.731	3.8479	5.30493	3.88806	2.544	5.11	2.07624	3.051	1.90466	1.64014	2.00915	1.36442	0.497847	0.680511	1.12711	0.0468344	1	+	+	+	-	-	-	Intron (XM_006558675.3/102654745, intron 1 of 2)	3814792	3884414	69623	-	102654745	XR_003304505.1
NC_037641.1	3871264	3871653	3871418;3871469;3871591	111	78	149	80	127	54	103	90	65	77	70	78	7.12096	4.30945	6.987	4.6008	6.59712	3.02335	5.68776	4.11411	3.35808	3.9858	3.59544	4.4635	1.65241	1.51865	2.18206	1.3825	0.842511	0.80552	0.820807	0.0485954	1	+	+	+	-	-	-	Intron (XM_006558675.3/102654745, intron 1 of 2)	3814792	3884414	69623	-	102654745	XR_003304505.1
NC_037641.1	3866205	3867360	3866628;3866636;3867103;3867069	250	162	353	155	268	128	148	160	115	170	118	129	15.9586	8.89165	16.4893	8.8608	13.8643	7.09113	8.14881	7.27881	5.90208	8.7381	6.02616	7.345	1.79478	1.86093	1.95516	1.11953	0.675442	0.820444	1.10119	0.00991161	1	+	+	+	-	-	-	Intron (XM_006558675.3/102654745, intron 1 of 2)	3814792	3884414	69623	-	102654745	XR_003304505.1
NC_037652.1	1158981	1159374	1159138;1159125;1159152	112	52	139	56	86	42	73	44	61	42	40	41	7.18454	2.89115	6.5212	3.2376	4.48398	2.36371	4.04706	2.03445	3.15456	2.1973	2.07624	2.373	2.48501	2.01421	1.89701	1.98926	1.43565	0.874943	0.572932	0.150123	1	+	+	+	-	-	-	Intron (XM_026445283.1/724047, intron 4 of 8)	1078859	1084275	5417	+	102654757	XR_001705719.2
NC_037653.1	4289186	4290693	4289317;4289951;4290361;4289887;4289931;4290382	352	213	341	182	558	154	193	216	171	203	161	216	22.4437	11.6737	15.9304	10.3944	28.8109	8.52035	10.6099	9.81057	8.75136	10.4244	8.20368	12.2605	1.92259	1.53259	3.38142	1.08148	0.839507	0.669115	1.40027	0.122633	1	+	+	+	-	-	-	3' UTR	4298028	4300496	2469	+	102654769	XR_003306233.1
NC_037640.1	8823730	8824492	8824063;8824282;8824225	276	155	235	90	317	113	155	136	99	139	91	108	17.6117	8.5098	10.9929	5.1688	16.3897	6.26658	8.53164	6.19377	5.088	7.154	4.65888	6.1585	2.06958	2.12678	2.61541	1.37746	0.711211	0.756496	1.25952	0.00971668	1	+	+	+	-	-	-	Distal Intergenic	8854526	8887515	32990	-	102654809	XR_003304348.1
NC_037651.1	7557463	7558056	7557844;7557617;7557764	129	96	164	67	201	74	124	105	74	104	85	70	8.2654	5.29135	7.6857	3.8624	10.4111	4.12275	6.83625	4.79226	3.816	5.3655	4.35504	4.0115	1.56206	1.98988	2.52528	1.42652	0.711211	1.08564	0.914842	0.0566013	1	+	+	+	-	-	-	Promoter (<=1kb)	7556583	7571148	14566	+	102654839	XM_006562957.3
NC_037641.1	6724765	6726193	6724960;6725429;6725885;6725279;6725978;6725970	360	225	272	157	401	200	255	221	163	214	118	221	22.9524	12.3283	12.7163	8.9744	20.7191	11.049	14.0006	10.0366	8.34432	10.9865	6.02616	12.543	1.86177	1.41695	1.8752	1.39495	0.759507	0.48044	0.967921	0.0697581	1	+	+	+	-	-	-	Promoter (1-2kb)	6727306	6729297	1992	+	102654858	XM_006562717.3
NC_037649.1	11051223	11051842	11051431;11051665;11051475;11051671;11051567	190	103	168	88	161	92	118	103	99	154	66	117	12.1438	5.6732	7.87202	5.0552	8.34948	5.11221	6.50811	4.70184	5.088	7.9205	3.39288	6.667	2.14056	1.55721	1.63324	1.38416	0.642384	0.508907	1.07217	0.0547383	1	+	+	+	-	-	-	Distal Intergenic	11074301	11083101	8801	-	102654959	XM_006566861.3
NC_037641.1	8395424	8396781	8395889;8396364;8395840;8396381;8395825;8396392	527	159	1110	182	872	156	111	181	91	178	109	142	33.5702	8.728	51.7504	10.3944	44.9944	8.63029	6.12528	8.22822	4.68096	9.1469	5.5704	8.0795	3.84626	4.97868	5.21354	0.744423	0.511754	0.689449	2.85108	0.00929398	1	+	+	+	-	-	-	Intron (XM_026440146.1/102654975, intron 1 of 3)	8404340	8475284	70945	+	102654975	XM_026440148.1
NC_037641.1	8400494	8401105	8400772;8400753;8400770	203	74	232	83	326	75	101	98	73	77	71	84	12.9703	4.09125	10.8531	4.7712	16.8536	4.17772	5.57838	4.47579	3.76512	3.9858	3.64608	4.8025	3.17025	2.27471	4.03416	1.24635	0.944633	0.759205	1.68395	0.0419701	1	+	+	+	-	-	-	Intron (XM_026440146.1/102654975, intron 1 of 3)	8404340	8475284	70945	+	102654975	XM_026440148.1
NC_037641.1	8402842	8403242	8402998;8403017;8403004	103	67	168	70	125	63	64	72	50	65	30	38	6.61232	3.7094	7.87202	4.0328	6.49404	3.51808	3.55485	3.30033	2.59488	3.3726	1.56984	2.2035	1.78258	1.952	1.8459	1.07712	0.7694	0.71243	1.12484	0.0053852	1	+	+	+	-	-	-	Promoter (1-2kb)	8404340	8475284	70945	+	102654975	XM_026440148.1
NC_037641.1	8388757	8389189	8388956;8388975;8388999	143	83	169	81	189	75	66	67	53	80	47	61	9.15552	4.5822	7.9186	4.6576	9.7926	4.17772	3.66423	3.07428	2.74752	4.1391	2.43072	3.503	1.99806	1.70015	2.34401	1.1919	0.663796	0.693897	1.24481	0.0101606	1	+	+	+	-	-	-	Intron (XM_026440146.1/102654975, intron 1 of 3)	8378908	8475988	97081	+	102654975	XM_026440149.1
NC_037641.1	8389580	8390116	8389868;8389845;8389872	217	86	243	80	285	93	58	96	59	76	68	96	13.8604	4.74585	11.3655	4.6008	14.7404	5.16718	3.22671	4.38537	3.0528	3.9347	3.49416	5.4805	2.92053	2.47033	2.8527	0.73579	0.775866	0.637562	1.93946	0.00264797	1	+	+	+	-	-	-	Intron (XM_026440146.1/102654975, intron 1 of 3)	8378908	8475988	97081	+	102654975	XM_026440149.1
NC_037641.1	8417228	8417861	8417519;8417582;8417559	169	89	312	93	421	91	85	105	62	115	79	83	10.8086	4.9095	14.5795	5.3392	21.7499	5.05724	4.70334	4.79226	3.20544	5.9276	4.0512	4.746	2.20157	2.73065	4.30075	0.981445	0.540765	0.853603	1.95837	0.0628326	1	+	+	+	-	-	-	Intron (XM_026440146.1/102654975, intron 3 of 3)	8404340	8475284	70945	+	102654975	XM_026440150.1
NC_037641.1	8426834	8427393	8427034;8427140;8427083	163	112	199	71	228	61	87	104	77	97	43	78	10.4271	6.16415	9.316	4.0896	11.8027	3.40814	4.81272	4.74705	3.96864	5.0078	2.22816	4.4635	1.69157	2.27797	3.46309	1.01383	0.792492	0.499196	1.68878	0.071994	1	+	+	+	-	-	-	Intron (XM_026440146.1/102654975, intron 3 of 3)	8404340	8475284	70945	+	102654975	XM_026440150.1
NC_037649.1	10978854	10979294	10979069;10979079;10979020	138	69	150	51	149	65	100	84	71	71	81	80	8.83762	3.8185	7.03358	2.9536	7.731	3.62802	5.52369	3.84285	3.66336	3.6792	4.15248	4.5765	2.31442	2.38136	2.13091	1.43739	0.995695	0.907348	1.03115	0.00930988	1	+	+	+	-	-	-	Distal Intergenic	10983869	10988918	5050	-	102654992	XR_410821.3
NC_037646.1	5914150	5914700	5914331;5914372;5914309	170	95	132	63	135	68	132	126	57	99	69	112	10.8722	5.2368	6.19514	3.6352	7.00944	3.79293	7.27377	5.74167	2.95104	5.11	3.5448	6.3845	2.07612	1.70421	1.84803	1.26684	0.577503	0.55522	1.22994	0.0280968	1	+	+	+	-	-	-	Intron (XM_016913998.2/412091, intron 5 of 29)	5875824	5879883	4060	+	102655174	XR_409149.2
NC_037638.1	27111384	27111796	27111546;27111605;27111616	93	60	136	48	142	66	85	70	78	49	50	51	5.97652	3.32755	6.38146	2.7832	7.37022	3.68299	4.70334	3.20991	4.01952	2.555	2.58264	2.938	1.79607	2.29285	2.00115	1.46526	1.5732	0.879047	0.636526	0.0574763	1	+	+	+	-	-	-	Promoter (1-2kb)	27110304	27113141	2838	+	102655202	XM_006571726.3
NC_037651.1	7439700	7441299	7439840;7440218;7441040;7440689;7440795;7441016	345	250	357	184	490	195	164	238	105	246	89	242	21.9987	13.6921	16.6756	10.508	25.3061	10.7741	9.02385	10.8052	5.39328	12.6217	4.5576	13.7295	1.60667	1.58694	2.34879	0.83514	0.427302	0.331957	1.7975	0.0167265	1	+	+	+	-	-	-	Promoter (1-2kb)	7442353	7444396	2044	+	102655247	XM_026445184.1
NC_037640.1	7516458	7517123	7516883;7516783;7516922	204	131	203	81	193	110	135	135	94	95	74	61	13.0339	7.2006	9.50232	4.6576	9.99876	6.10167	7.43784	6.14856	4.8336	4.9056	3.798	3.503	1.81011	2.04018	1.63869	1.20969	0.985323	1.08421	0.743184	0.0103553	1	+	+	+	-	-	-	Distal Intergenic	7569798	7592745	22948	+	102655392	XM_006563879.3
NC_037640.1	7536131	7536522	7536316;7536325;7536368	128	75	147	57	141	49	100	81	56	65	43	52	8.20182	4.1458	6.89384	3.2944	7.31868	2.7485	5.52369	3.70722	2.90016	3.3726	2.22816	2.9945	1.97834	2.09259	2.66279	1.48998	0.859918	0.744084	1.12194	0.0183432	1	+	+	+	-	-	-	Distal Intergenic	7569798	7592745	22948	+	102655392	XM_006563879.3
NC_037640.1	7548788	7549305	7548956;7548990;7549004;7549213	162	90	134	66	130	86	109	129	83	80	78	74	10.3635	4.96405	6.2883	3.8056	6.75174	4.78239	6.0159	5.8773	4.27392	4.1391	4.00056	4.2375	2.08771	1.65238	1.41179	1.02358	1.03257	0.944085	0.780022	0.0656169	1	+	+	+	-	-	-	Distal Intergenic	7569798	7592745	22948	+	102655392	XM_006563879.3
NC_037638.1	1230829	1231430	1231046;1231252;1231199;1231207	162	105	194	74	180	93	118	134	67	82	67	83	10.3635	5.7823	9.0831	4.26	9.32874	5.16718	6.50811	6.10335	3.45984	4.2413	3.44352	4.746	1.79228	2.13218	1.80538	1.06632	0.81575	0.725563	1.13576	0.00237814	1	+	+	+	-	-	-	Intron (XM_016917650.2/726912, intron 1 of 7)	1213342	1214946	1605	+	102655442	XR_407455.3
NC_037647.1	8510012	8510513	8510296;8510183;8510283	181	82	154	79	150	94	109	87	99	97	53	101	11.5716	4.52765	7.2199	4.544	7.78254	5.22215	6.0159	3.97848	5.088	5.0078	2.73456	5.763	2.55576	1.58889	1.49029	1.51211	1.01602	0.474503	0.908175	0.126008	1	+	+	+	-	-	-	Intron (XM_006565561.3/102655479, intron 2 of 10)	8446184	8516201	70018	-	102655479	XM_006565561.3
NC_037647.1	10532886	10533221	10533077;10533026;10533119	111	60	127	69	129	66	62	72	54	62	43	63	7.12096	3.32755	5.96224	3.976	6.7002	3.68299	3.44547	3.30033	2.7984	3.2193	2.22816	3.616	2.14	1.49956	1.81923	1.04398	0.869257	0.616195	1.10977	0.0158651	1	+	+	+	-	-	-	Promoter (1-2kb)	10531028	10539247	8220	+	102655481	XR_003305517.1
NC_037653.1	4114234	4114728	4114482;4114460;4114451	142	84	145	72	128	49	61	65	45	79	32	67	9.09194	4.63675	6.80068	4.1464	6.64866	2.7485	3.39078	2.98386	2.34048	4.088	1.67112	3.842	1.96084	1.64014	2.41901	1.13637	0.572524	0.434961	1.48955	0.0143879	1	+	+	+	-	-	-	Distal Intergenic	4063197	4067461	4265	-	102655509	XR_408305.3
NC_037652.1	8619989	8620315	8620150;8620158;8620173	116	57	120	50	103	52	70	38	82	75	35	64	7.43886	3.1639	5.63618	2.8968	5.36016	2.91341	3.88299	1.76319	4.22304	3.8836	1.82304	3.6725	2.35117	1.94566	1.83982	2.20225	1.0874	0.496403	0.696754	0.2537	1	+	+	+	-	-	-	Intron (XM_016916568.2/726948, intron 4 of 12)	8681730	8684569	2840	+	102655522	XR_409738.3
NC_037647.1	10982794	10983279	10982912;10982931;10983217	117	77	118	58	107	66	64	82	70	71	57	77	7.50244	4.2549	5.54302	3.3512	5.56632	3.68299	3.55485	3.75243	3.61248	3.6792	2.93712	4.407	1.76325	1.65404	1.51136	0.947346	0.981866	0.666467	0.92508	0.00437701	1	+	+	+	-	-	-	Promoter (2-3kb)	10983809	10985302	1494	-	102655526	XR_003305405.1
NC_037653.1	4725633	4726001	4725822;4725819;4725877	155	71	130	78	113	54	81	65	80	70	56	38	9.91848	3.9276	6.10198	4.4872	5.87556	3.02335	4.48458	2.98386	4.12128	3.6281	2.88648	2.2035	2.52533	1.35986	1.94339	1.50295	1.13593	1.30995	0.56172	0.196529	1	+	+	+	-	-	-	Promoter (<=1kb)	4714255	4726319	12065	-	102655619	XR_001705842.2
NC_037652.1	8393351	8393863	8393612;8393542;8393614	114	95	195	65	193	81	72	80	55	93	62	75	7.3117	5.2368	9.12968	3.7488	9.99876	4.50754	3.99237	3.66201	2.84928	4.8034	3.19032	4.294	1.39622	2.43536	2.21823	1.09021	0.59318	0.742972	1.31809	0.0445251	1	+	+	+	-	-	-	Intron (XM_016916568.2/726948, intron 10 of 12)	8365187	8372346	7160	+	102655621	XR_409741.3
NC_037652.1	8443264	8443657	8443492;8443492;8443515	108	78	133	48	128	54	50	95	63	79	37	64	6.93022	4.30945	6.24172	2.7832	6.64866	3.02335	2.78919	4.34016	3.25632	4.088	1.92432	3.6725	1.60814	2.24264	2.1991	0.642647	0.796556	0.523981	1.62371	0.0128902	1	+	+	+	-	-	-	Intron (XM_016916568.2/726948, intron 8 of 12)	8365187	8372346	7160	+	102655621	XR_409741.3
NC_037640.1	12252674	12253227	12252818;12253000;12253018	123	74	181	57	116	63	89	85	83	105	67	66	7.88392	4.09125	8.47756	3.2944	6.03018	3.51808	4.9221	3.88806	4.27392	5.4166	3.44352	3.7855	1.92702	2.57332	1.71405	1.26595	0.789041	0.909661	1.06775	0.0327863	1	+	+	+	-	-	-	Promoter (<=1kb)	12252285	12255940	3656	+	102655634	XR_003304251.1
NC_037647.1	6061019	6061983	6061177;6061385;6061752;6061380;6061197	217	124	210	110	225	109	157	145	108	180	80	137	13.8604	6.81875	9.82838	6.3048	11.648	6.0467	8.64102	6.60066	5.54592	9.2491	4.10184	7.797	2.03269	1.55887	1.92634	1.30911	0.599617	0.526079	1.18031	0.0339929	1	+	+	+	-	-	-	Distal Intergenic	6077554	6126438	48885	+	102655698	XR_409564.3
NC_037647.1	6080373	6080919	6080506;6080763;6080571;6080577	163	99	147	61	206	106	117	96	74	114	61	85	10.4271	5.455	6.89384	3.5216	10.6688	5.88179	6.45342	4.38537	3.816	5.8765	3.13968	4.859	1.91148	1.95759	1.81387	1.47158	0.649366	0.646158	1.03826	0.0681625	1	+	+	+	-	-	-	Promoter (2-3kb)	6077554	6126438	48885	+	102655698	XR_409564.3
NC_037647.1	6107017	6107631	6107139;6107477;6107177;6107384	141	65	129	60	132	84	111	108	59	95	38	71	9.02836	3.6003	6.0554	3.4648	6.85482	4.67245	6.12528	4.92789	3.0528	4.9056	1.97496	4.068	2.50767	1.74769	1.46707	1.24298	0.622309	0.485487	1.28349	0.0486716	1	+	+	+	-	-	-	Intron (XR_409564.3/102655698, intron 2 of 3)	6077554	6126438	48885	+	102655698	XR_409564.3
NC_037647.1	10567524	10568058	10567770;10567792;10567826	178	50	108	55	136	57	90	87	77	64	81	45	11.3808	2.78205	5.07722	3.1808	7.06098	3.18826	4.97679	3.97848	3.96864	3.3215	4.15248	2.599	4.0908	1.59621	2.21468	1.25093	1.19483	1.59772	0.966562	0.226217	1	+	+	+	-	-	-	Exon (XM_016914471.2/100577138, exon 3 of 15)	10557516	10559091	1576	+	102655756	XM_006566167.3
NC_037643.1	12454587	12455087	12454772;12454848;12454890	156	101	162	86	161	63	121	127	113	126	69	98	9.98206	5.5641	7.59254	4.9416	8.34948	3.51808	6.67218	5.78688	5.80032	6.4897	3.5448	5.5935	1.79401	1.53645	2.37331	1.15298	0.893773	0.633736	1.08942	0.0345024	1	+	+	+	-	-	-	Intron (XM_006569976.3/411155, intron 1 of 25)	12463802	12468069	4268	-	102655786	XR_003304907.1
NC_037652.1	5313390	5314157	5313693;5314011;5313966	180	134	170	85	245	104	143	116	89	101	72	128	11.508	7.36425	7.96518	4.8848	12.6788	5.77185	7.87536	5.28957	4.5792	5.2122	3.69672	7.2885	1.56268	1.63061	2.19666	1.48885	0.878554	0.507199	0.906911	0.0819571	1	+	+	+	-	-	-	Promoter (<=1kb)	5312649	5314988	2340	+	102655810	XM_006561044.3
NC_037643.1	3418158	3418968	3418594;3418597;3418626	348	134	459	116	325	95	73	115	62	99	36	93	22.1894	7.36425	21.4268	6.6456	16.802	5.27712	4.04706	5.24436	3.20544	5.11	1.87368	5.311	3.01312	3.22421	3.18393	0.771698	0.627288	0.352792	2.4271	0.000329051	1	+	+	+	-	-	-	Promoter (<=1kb)	3403140	3419391	16252	-	102655889	XM_026441384.1
NC_037643.1	3416292	3417954	3417012;3417472;3416614;3416955;3417558;3416922;3417579	546	205	957	180	502	168	156	221	144	208	88	186	34.7783	11.2373	44.6236	10.2808	25.9246	9.28993	8.58633	10.0366	7.3776	10.6799	4.50696	10.5655	3.0949	4.34048	2.79061	0.855502	0.690793	0.426573	2.37387	0.0224866	1	+	+	+	-	-	-	Promoter (1-2kb)	3403140	3419391	16252	-	102655889	XM_026441384.1
NC_037643.1	3400558	3401212	3400877;3400915;3400819;3400992	164	76	182	75	219	76	50	122	62	99	56	101	10.4907	4.20035	8.52414	4.3168	11.3388	4.23269	2.78919	5.56083	3.20544	5.11	2.88648	5.763	2.49758	1.97464	2.67886	0.501578	0.627288	0.500864	2.13353	0.0105885	1	+	+	+	-	-	-	Downstream (1-2kb)	3403140	3419391	16252	-	102655889	XM_026441384.1
NC_037643.1	3389583	3390057	3389839;3389841;3389852	134	67	190	86	252	86	38	79	50	72	43	47	8.5833	3.7094	8.89678	4.9416	13.0396	4.78239	2.13291	3.6168	2.59488	3.7303	2.22816	2.712	2.31393	1.80038	2.72659	0.589723	0.695622	0.821593	1.69904	0.0222503	1	+	+	+	-	-	-	Distal Intergenic	3403140	3419391	16252	-	102655889	XM_026441384.1
NC_037643.1	3386940	3388702	3387443;3388451;3387468;3387471;3388445;3388456	493	142	870	156	880	183	110	176	160	176	111	176	31.4085	7.80065	40.5712	8.9176	45.4067	10.1145	6.07059	8.00217	8.19168	9.0447	5.67168	10.0005	4.0264	4.54956	4.48927	0.758618	0.905688	0.56714	2.54968	0.000198265	1	+	+	+	-	-	-	Distal Intergenic	3403140	3419391	16252	-	102655889	XM_026441384.1
NC_037643.1	3381096	3381930	3381595;3381556;3381606	243	121	267	112	450	112	141	138	114	127	62	120	15.5135	6.6551	12.4834	6.4184	23.2445	6.21161	7.76598	6.28419	5.8512	6.5408	3.19032	6.8365	2.33107	1.94494	3.74211	1.2358	0.894569	0.46666	1.6264	0.0645645	1	+	+	+	-	-	-	Distal Intergenic	3403140	3419391	16252	-	102655889	XM_026441384.1
NC_037643.1	3380185	3380675	3380361;3380348;3380449	111	75	124	67	195	71	95	109	64	65	42	94	7.12096	4.1458	5.8225	3.8624	10.1018	3.95784	5.25024	4.9731	3.3072	3.3726	2.17752	5.3675	1.71763	1.50748	2.55235	1.05573	0.980608	0.405686	1.24236	0.0520247	1	+	+	+	-	-	-	Distal Intergenic	3403140	3419391	16252	-	102655889	XM_026441384.1
NC_037644.1	2727615	2728042	2727817;2727814;2727839	170	76	124	67	159	76	130	105	97	89	73	88	10.8722	4.20035	5.8225	3.8624	8.2464	4.23269	7.16439	4.79226	4.98624	4.599	3.74736	5.0285	2.5884	1.50748	1.94826	1.49499	1.0842	0.745224	0.862438	0.0843535	1	+	+	+	-	-	-	Exon (XR_003305067.1/102655976, exon 2 of 2)	2727446	2732986	5541	-	102655976	XR_003305067.1
NC_037642.1	3351232	3351801	3351529;3351547;3351484	195	103	171	87	187	96	122	85	97	96	65	96	12.4617	5.6732	8.01176	4.9984	9.68952	5.33209	6.72687	3.88806	4.98624	4.9567	3.34224	5.4805	2.19659	1.60286	1.81721	1.73014	1.00596	0.609842	0.747303	0.13292	1	+	+	+	-	-	-	Distal Intergenic	3386799	3433747	46949	+	102656027	XM_026440825.1
NC_037642.1	3391358	3392738	3391480;3391808;3391583;3391761;3392291;3392396	293	206	299	180	345	170	210	191	143	182	101	210	18.6925	11.2919	13.974	10.2808	17.8328	9.39987	11.5396	8.68032	7.32672	9.3513	5.16528	11.9215	1.65539	1.35923	1.89713	1.3294	0.783497	0.433274	0.94791	0.0739422	1	+	+	+	-	-	-	Intron (XM_026440825.1/102656027, intron 1 of 1)	3386799	3433747	46949	+	102656027	XM_026440825.1
NC_037649.1	6257947	6258304	6258069;6258083;6258232	107	87	115	66	97	60	70	93	54	78	33	47	6.86664	4.8004	5.40328	3.8056	5.05092	3.35317	3.88299	4.24974	2.7984	4.0369	1.72176	2.712	1.43043	1.41982	1.50631	0.913701	0.693205	0.634867	0.958551	0.00890378	1	+	+	+	-	-	-	Distal Intergenic	6264278	6273660	9383	+	102656043	XR_409353.3
NC_037652.1	4673396	4673995	4673722;4673680;4673817	163	107	147	85	182	64	109	118	53	115	49	127	10.4271	5.8914	6.89384	4.8848	9.43182	3.57305	6.0159	5.37999	2.74752	5.9276	2.532	7.232	1.76988	1.41128	2.63971	1.1182	0.463513	0.350111	1.59127	0.0494256	1	+	+	+	-	-	-	Promoter (<=1kb)	4672447	4673050	604	-	102656143	XM_006561051.3
NC_037651.1	7106892	7108296	7107090;7107049;7107226;7107522;7108013;7107896;7108097	368	208	369	193	390	176	285	244	160	189	156	217	23.461	11.4009	17.2346	11.0192	20.1521	9.72969	15.6413	11.0764	8.19168	9.709	7.95048	12.317	2.05782	1.56405	2.0712	1.41213	0.84372	0.645488	0.972488	0.0349714	1	+	+	+	-	-	-	Intron (XM_016916252.2/408455, intron 5 of 5)	7095602	7097708	2107	-	102656201	XR_409587.3
NC_037639.1	10635392	10635895	10635484;10635714;10635599	112	75	148	61	136	82	126	88	80	91	53	66	7.18454	4.1458	6.94042	3.5216	7.06098	4.56251	6.94563	4.02369	4.12128	4.7012	2.73456	3.7855	1.73297	1.97081	1.54761	1.72618	0.876644	0.722377	0.659256	0.165271	1	+	+	+	-	-	-	Distal Intergenic	10576694	10599530	22837	+	102656216	XM_026438974.1
NC_037639.1	10662487	10663110	10662874;10662879;10662873	137	76	195	83	227	48	107	94	82	65	82	77	8.77404	4.20035	9.12968	4.7712	11.7511	2.69353	5.90652	4.29495	4.22304	3.3726	4.20312	4.407	2.08888	1.9135	4.36271	1.37522	1.25216	0.953737	1.22397	0.17782	1	+	+	+	-	-	-	Distal Intergenic	10576694	10599530	22837	+	102656216	XM_026438974.1
NC_037642.1	5823798	5824821	5823967;5824368;5824357;5824489	262	163	191	124	309	108	194	163	133	147	121	139	16.7215	8.9462	8.94336	7.1	15.9774	5.99173	10.6646	7.41444	6.81792	7.5628	6.17808	7.91	1.86912	1.25963	2.66658	1.43836	0.901507	0.781047	0.892922	0.147035	1	+	+	+	-	-	-	Promoter (2-3kb)	5827812	5830206	2395	+	102656326	XM_026440969.1
NC_037648.1	10110576	10111175	10110925;10110916;10110928	169	77	267	79	221	74	86	100	75	69	99	84	10.8086	4.2549	12.4834	4.544	11.4419	4.12275	4.75803	4.56621	3.86688	3.577	5.064	4.8025	2.54027	2.74723	2.77531	1.04201	1.08104	1.05445	1.34339	0.00167541	1	+	+	+	-	-	-	Promoter (<=1kb)	10073094	10111397	38304	-	102656336	XR_001704786.2
NC_037648.1	10108394	10108886	10108621;10108618;10108647	160	86	239	58	183	63	64	87	86	82	84	65	10.2364	4.74585	11.1792	3.3512	9.48336	3.51808	3.55485	3.97848	4.42656	4.2413	4.3044	3.729	2.15692	3.33588	2.69561	0.89352	1.04368	1.1543	1.40527	0.0328452	1	+	+	+	-	-	-	Promoter (2-3kb)	10073094	10111397	38304	-	102656336	XR_001704786.2
NC_037646.1	417368	417844	417620;417581;417602	142	55	150	49	91	56	104	104	50	76	45	58	9.09194	3.0548	7.03358	2.84	4.74168	3.13329	5.74245	4.74705	2.59488	3.9347	2.32944	3.3335	2.97628	2.47661	1.51332	1.20969	0.659486	0.698797	1.43975	0.0599873	1	+	+	+	-	-	-	5' UTR	397832	503779	105948	+	102656465	XM_026442779.1
NC_037646.1	4931180	4931844	4931410;4931565;4931431	173	101	279	66	207	87	107	121	71	102	34	78	11.0629	5.5641	13.0424	3.8056	10.7203	4.83736	5.90652	5.51562	3.66336	5.2633	1.7724	4.4635	1.98826	3.42716	2.21615	1.07087	0.69602	0.397087	1.81829	0.0389772	1	+	+	+	-	-	-	Distal Intergenic	4851381	4853328	1948	-	102656483	XR_003305375.1
NC_037639.1	10994969	10995534	10995268;10995246;10995241	171	96	142	70	185	90	111	113	113	94	47	80	10.9358	5.29135	6.66094	4.0328	9.58644	5.00227	6.12528	5.15394	5.80032	4.8545	2.43072	4.5765	2.06673	1.65169	1.91642	1.18847	1.19483	0.531131	0.951161	0.0344443	1	+	+	+	-	-	-	Intron (XM_026439041.1/100577255, intron 1 of 2)	10986767	10989283	2517	+	102656630	XR_001702234.2
NC_037639.1	11008406	11009573	11008920;11008884;11008898;11009453	304	147	417	171	332	153	95	158	128	186	99	135	19.3919	8.0734	19.4704	9.7696	17.1628	8.46538	5.25024	7.18839	6.56352	9.5557	5.064	7.684	2.40195	1.99296	2.02741	0.730378	0.68687	0.659032	1.62909	0.00695064	1	+	+	+	-	-	-	Intron (XM_026439041.1/100577255, intron 1 of 2)	10986767	10989283	2517	+	102656630	XR_001702234.2
NC_037642.1	12306923	12307533	12307084;12307104;12307129	130	77	127	68	160	75	130	120	101	101	81	90	8.32898	4.2549	5.96224	3.9192	8.29794	4.17772	7.16439	5.47041	5.18976	5.2122	4.15248	5.1415	1.9575	1.52129	1.98624	1.30966	0.995695	0.80764	0.811925	0.0202405	1	+	+	+	-	-	-	Intron (XM_016912182.2/408862, intron 1 of 11)	12262356	12267607	5252	-	102656631	XR_003304639.1
NC_037648.1	9006063	9006963	9006649;9006248;9006594;9006774;9006710	190	143	203	107	315	105	158	154	109	154	93	131	12.1438	7.8552	9.50232	6.1344	16.2866	5.82682	8.69571	7.00755	5.5968	7.9205	4.76016	7.458	1.54596	1.54902	2.79511	1.24091	0.706622	0.638262	1.18768	0.101214	1	+	+	+	-	-	-	Distal Intergenic	8977999	8979223	1225	+	102656634	XR_409934.3
NC_037648.1	2563540	2563954	2563686;2563707;2563760	89	58	151	53	90	42	76	57	80	66	53	45	5.7222	3.21845	7.08016	3.0672	4.69014	2.36371	4.21113	2.62218	4.12128	3.4237	2.73456	2.599	1.77794	2.30835	1.98423	1.60597	1.20375	1.05216	0.652517	0.0314157	1	+	+	+	-	-	-	Promoter (1-2kb)	2556287	2562003	5717	-	102656737	XR_408152.2
NC_037638.1	8006160	8006466	8006305;8006316;8006324	82	52	105	36	112	48	74	59	81	52	34	42	5.27714	2.89115	4.93748	2.1016	5.82402	2.69353	4.10175	2.7126	4.17216	2.7083	1.7724	2.4295	1.82527	2.34939	2.16223	1.51211	1.54051	0.729533	0.744568	0.064374	1	+	+	+	-	-	-	Intron (XM_001122450.5/726729, intron 2 of 5)	7992741	7993882	1142	-	102656747	XM_026446247.1
NC_037644.1	13319655	13320364	13320081;13320060;13320076	299	70	529	107	253	70	34	99	32	77	37	75	19.074	3.87305	24.6874	6.1344	13.0912	3.90287	1.91415	4.521	1.67904	3.9858	1.92432	4.294	4.9248	4.02442	3.35425	0.423391	0.421255	0.448142	3.25051	0.014997	1	+	+	+	-	-	-	Promoter (1-2kb)	13303707	13322303	18597	-	102656862	XR_411526.3
NC_037644.1	13318595	13319334	13319019;13319003;13319000	279	72	402	78	288	78	58	86	62	76	44	120	17.8024	3.98215	18.7717	4.4872	14.8951	4.34263	3.22671	3.93327	3.20544	3.9347	2.2788	6.8365	4.47055	4.18339	3.42997	0.820363	0.814659	0.333328	2.61803	0.00234115	1	+	+	+	-	-	-	Promoter (2-3kb)	13303707	13322303	18597	-	102656862	XR_411526.3
NC_037644.1	13314123	13314627	13314367;13314391;13314398	138	93	154	71	170	40	71	82	45	72	34	77	8.83762	5.1277	7.2199	4.0896	8.81334	2.25377	3.93768	3.75243	2.34048	3.7303	1.7724	4.407	1.72351	1.76543	3.91049	1.04937	0.627424	0.402178	1.83154	0.125463	1	+	+	+	-	-	-	Intron (XR_003305017.1/102656862, intron 1 of 3)	13303707	13322303	18597	-	102656862	XR_411526.3
NC_037644.1	13299340	13300330	13299508;13300003;13299998;13300128	190	145	313	135	232	143	69	171	70	135	46	118	12.1438	7.9643	14.6261	7.7248	12.0088	7.91568	3.8283	7.77612	3.61248	6.9496	2.38008	6.7235	1.52478	1.8934	1.51709	0.492315	0.519811	0.353994	1.85304	0.00476233	1	+	+	+	-	-	-	Downstream (2-3kb)	13303707	13322303	18597	-	102656862	XR_411526.3
NC_037642.1	13191909	13192300	13192113;13192122;13192126	131	59	152	56	92	56	63	76	48	56	47	32	8.39256	3.273	7.12674	3.2376	4.79322	3.13329	3.50016	3.48117	2.49312	2.9127	2.43072	1.8645	2.56418	2.20124	1.52977	1.00546	0.855948	1.30368	0.992005	0.0579474	1	+	+	+	-	-	-	Promoter (<=1kb)	13184485	13193103	8619	-	102656864	XR_003304700.1
NC_037645.1	5546759	5547144	5546984;5546930;5546945	121	69	123	55	130	65	84	73	51	76	32	59	7.75676	3.8185	5.77592	3.1808	6.75174	3.62802	4.64865	3.34554	2.64576	3.9347	1.67112	3.39	2.03136	1.81587	1.861	1.38951	0.672417	0.492956	1.15979	0.0547628	1	+	+	+	-	-	-	Promoter (1-2kb)	5542106	5548397	6292	-	102656871	XR_409135.3
NC_037645.1	5544727	5545652	5544976;5545002;5545434;5545015;5545441	283	136	347	143	453	149	140	130	119	117	108	130	18.0567	7.47335	16.2098	8.1792	23.3992	8.2455	7.71129	5.92251	6.1056	6.0298	5.51976	7.4015	2.41615	1.98183	2.83781	1.30203	1.01257	0.745762	1.24145	0.0131905	1	+	+	+	-	-	-	Promoter (2-3kb)	5542106	5548397	6292	-	102656871	XR_409135.3
NC_037641.1	8735670	8736007	8735823;8735860;8735873	80	48	133	46	130	67	78	64	73	65	24	63	5.14998	2.67295	6.24172	2.6696	6.75174	3.73796	4.32051	2.93865	3.76512	3.3726	1.266	3.616	1.9267	2.33807	1.80626	1.47024	1.11638	0.350111	1.04773	0.0682803	1	+	+	+	-	-	-	Intron (XM_003250097.4/100578248, intron 1 of 1)	8721556	8724553	2998	+	102656931	XR_003304553.1
NC_037641.1	8738954	8739491	8739214;8739221;8739240	160	81	223	60	170	94	85	99	78	94	97	63	10.2364	4.4731	10.4339	3.4648	8.81334	5.22215	4.70334	4.521	4.01952	4.8545	4.96272	3.616	2.28844	3.0114	1.68768	1.04033	0.827999	1.37243	1.10845	0.0662055	1	+	+	+	-	-	-	Intron (XM_003250097.4/100578248, intron 1 of 1)	8721556	8724553	2998	+	102656931	XR_003304553.1
NC_037653.1	3623368	3623883	3623556;3623577;3623666	121	72	150	69	144	72	89	93	91	100	63	74	7.75676	3.98215	7.03358	3.976	7.4733	4.01281	4.9221	4.24974	4.68096	5.1611	3.24096	4.2375	1.94788	1.76901	1.86236	1.15821	0.906969	0.764828	0.979265	0.00694704	1	+	+	+	-	-	-	Distal Intergenic	3645055	3645107	53	-	104794315	104794315
NC_037640.1	7166248	7166975	7166614;7166550;7166542	303	98	313	85	264	96	112	143	76	103	78	92	19.3283	5.40045	14.6261	4.8848	13.6581	5.33209	6.17997	6.51024	3.91776	5.3144	4.00056	5.2545	3.57902	2.99421	2.56149	0.949269	0.737197	0.761359	1.89986	0.0135753	1	+	+	+	-	-	-	Distal Intergenic	7173489	7173509	21	-	104794345	104794345
NC_037646.1	3373392	3373912	3373733;3373575;3373601	132	90	146	68	148	74	107	107	83	89	38	77	8.45614	4.96405	6.84726	3.9192	7.67946	4.12275	5.90652	4.88268	4.27392	4.599	1.97496	4.407	1.70348	1.74711	1.8627	1.20969	0.929315	0.448142	1.03824	0.0495023	1	+	+	+	-	-	-	Intron (XM_026442880.1/725024, intron 12 of 12)	3421818	3421893	76	+	104794346	NR_127327.1
NC_037650.1	7205238	7206100	7205671;7205657;7205618	124	119	734	111	278	131	84	118	103	129	26	109	7.9475	6.546	34.2363	6.3616	14.3797	7.25604	4.64865	5.37999	5.29152	6.643	1.36728	6.215	1.2141	5.38171	1.98176	0.864063	0.796556	0.219997	2.18936	0.221229	1	+	+	+	-	-	-	Distal Intergenic	7148947	7149024	78	-	104794357	NR_127341.1
NC_037650.1	7204087	7204897	7204514;7204545;7204628	100	101	535	103	252	97	48	86	57	111	26	86	6.42158	5.5641	24.9669	5.9072	13.0396	5.38706	2.67981	3.93327	2.95104	5.7232	1.36728	4.9155	1.15411	4.22652	2.42054	0.681319	0.515628	0.278157	2.40287	0.139445	1	+	+	+	-	-	-	Distal Intergenic	7148947	7149024	78	-	104794357	NR_127341.1
NC_037650.1	7193320	7193827	7193530;7193482;7193637	110	58	190	76	152	62	85	98	82	98	51	114	7.05738	3.21845	8.89678	4.3736	7.88562	3.46311	4.70334	4.47579	4.22304	5.0589	2.63328	6.4975	2.19279	2.0342	2.27703	1.05084	0.834774	0.405276	1.50542	0.0101843	1	+	+	+	-	-	-	Distal Intergenic	7148947	7149024	78	-	104794357	NR_127341.1
NC_037642.1	9067835	9068312	9068001;9068119;9068216	139	81	145	75	126	70	112	69	97	84	87	76	8.9012	4.4731	6.80068	4.3168	6.54558	3.90287	6.17997	3.1647	4.98624	4.3435	4.45632	4.3505	1.98994	1.5754	1.67712	1.95278	1.14798	1.02432	0.34582	0.332432	1	+	+	+	-	-	-	Intron (XM_003250637.4/100576129, intron 1 of 7)	9073813	9073836	24	-	104796160	104796160
NC_037640.1	5947872	5948840	5948290;5948180;5948683;5948370	262	146	337	92	330	110	127	134	107	160	95	98	16.7215	8.01885	15.744	5.2824	17.0597	6.10167	7.00032	6.10335	5.49504	8.2271	4.86144	5.5935	2.08527	2.98046	2.79591	1.14696	0.667919	0.869123	1.55044	0.0113413	1	+	+	+	-	-	-	Exon (XM_026439413.1/410951, exon 8 of 13)	5954606	5954686	81	+	104796165	NR_127356.1
NC_037646.1	10817254	10818002	10817574;10817557;10817657	263	142	259	93	332	92	124	144	63	102	54	105	16.7851	7.80065	12.1108	5.3392	17.1628	5.11221	6.83625	6.55545	3.25632	5.2633	2.7852	5.989	2.15176	2.26828	3.35722	1.04283	0.618684	0.465053	1.87073	0.0244342	1	+	+	+	-	-	-	Intron (XM_016913866.2/725336, intron 6 of 6)	10813454	10813534	81	-	104796171	NR_127366.1
NC_037646.1	10794578	10795809	10794736;10795217;10795639;10794772;10794891;10795596	290	157	263	132	339	172	181	176	163	210	103	185	18.5018	8.6189	12.2971	7.5544	17.5236	9.50981	9.95358	8.00217	8.34432	10.7821	5.26656	10.509	2.14665	1.62781	1.84269	1.24386	0.773905	0.501148	1.15704	0.0216149	1	+	+	+	-	-	-	Exon (XM_006567524.3/725336, exon 7 of 7)	10813503	10813524	22	-	104796171	104796171
NC_037640.1	7134010	7136452	7134299;7134795;7135421;7135850;7134265;7134749;7135422;7135916;7136279;7135992;7136298	619	344	591	327	869	306	368	377	218	367	196	327	39.4196	18.8197	27.5754	18.6304	44.8398	16.8758	20.1806	17.0894	11.1427	18.8048	9.97608	18.532	2.09459	1.48013	2.65705	1.18088	0.592546	0.538316	1.43066	0.0402783	1	+	+	+	-	-	-	Promoter (<=1kb)	7134690	7134770	81	+	104797386	NR_127367.1
NC_037649.1	9731759	9732301	9732026;9732124;9732093	134	63	179	70	174	69	113	94	102	82	61	87	8.5833	3.4912	8.3844	4.0328	9.0195	3.8479	6.23466	4.29495	5.24064	4.2413	3.13968	4.972	2.45855	2.07905	2.34401	1.45163	1.23562	0.631472	1.05212	0.0250282	1	+	+	+	-	-	-	Intron (XM_026444405.1/552397, intron 3 of 4)	9713500	9713900	401	+	107963967	XM_003250905.4
NC_037649.1	9743770	9744607	9744375;9744037;9744428;9744058;9744448	198	118	252	119	307	122	182	152	127	125	97	96	12.6524	6.49145	11.7847	6.816	15.8743	6.76131	10.0083	6.91713	6.51264	6.4386	4.96272	5.4805	1.94909	1.72898	2.34781	1.44689	1.0115	0.905523	0.841033	0.0227539	1	+	+	+	-	-	-	Intron (XM_026444405.1/552397, intron 3 of 4)	9713500	9713900	401	+	107963967	XM_003250905.4
NC_037643.1	15702645	15703182	15702923;15702956;15702974	177	55	205	70	204	78	88	96	59	72	91	64	11.3172	3.0548	9.59548	4.0328	10.5657	4.34263	4.86741	4.38537	3.0528	3.7303	4.65888	3.6725	3.70473	2.37936	2.43302	1.10992	0.818379	1.26859	1.4137	0.0448929	1	+	+	+	-	-	-	Promoter (<=1kb)	15703232	15706095	2864	+	107963977	XR_003304882.1
NC_037638.1	23772146	23772685	23772260;23772475;23772346	164	129	164	68	135	73	115	95	97	104	52	102	10.4907	7.0915	7.6857	3.9192	7.00944	4.06778	6.34404	4.34016	4.98624	5.3655	2.68392	5.8195	1.47933	1.96104	1.72316	1.46171	0.929315	0.461194	0.856275	0.0993184	1	+	+	+	-	-	-	Promoter (1-2kb)	23774646	23798445	23800	+	107963993	XM_016917895.2
NC_037638.1	23775283	23775826	23775504;23775580;23775550	151	67	131	71	156	66	82	135	66	75	36	73	9.66416	3.7094	6.14856	4.0896	8.09178	3.68299	4.53927	6.14856	3.40896	3.8836	1.87368	4.181	2.60532	1.50346	2.19707	0.738266	0.877783	0.448142	1.61111	0.0344149	1	+	+	+	-	-	-	Promoter (<=1kb)	23774646	23798445	23800	+	107963993	XM_016917895.2
NC_037638.1	23779469	23780406	23779947;23779669;23780110;23780081	215	124	214	94	258	134	185	168	99	167	98	149	13.7333	6.81875	10.0147	5.396	13.3489	7.42095	10.1723	7.64049	5.088	8.5848	5.01336	8.475	2.01405	1.85595	1.79881	1.33137	0.592675	0.591547	1.17215	0.0432504	1	+	+	+	-	-	-	Intron (XM_016917895.2/107963993, intron 2 of 8)	23774646	23798445	23800	+	107963993	XM_016917895.2
NC_037650.1	2570612	2571032	2570797;2570830;2570885	107	64	175	50	147	52	66	83	74	73	70	62	6.86664	3.54575	8.19808	2.8968	7.62792	2.91341	3.66423	3.79764	3.816	3.7814	3.59544	3.5595	1.93658	2.83005	2.61821	0.96487	1.00915	1.0101	1.30726	0.0318107	1	+	+	+	-	-	-	Distal Intergenic	2578215	2584893	6679	-	107964001	XR_407590.3
NC_037639.1	5368645	5369066	5368819;5368800;5368874	109	59	117	62	121	73	76	76	87	66	48	59	6.9938	3.273	5.49644	3.5784	6.28788	4.06778	4.21113	3.48117	4.47744	3.4237	2.48136	3.39	2.13682	1.536	1.54578	1.20969	1.30778	0.731965	0.683475	0.070332	1	+	+	+	-	-	-	Promoter (2-3kb)	5368471	5371948	3478	-	107964083	XR_001702240.2
NC_037640.1	2842156	2842962	2842295;2842728;2842345;2842767;2842794	241	147	226	109	247	120	192	152	157	119	128	116	15.3864	8.0734	10.5737	6.248	12.7819	6.65137	10.5552	6.91713	8.03904	6.132	6.53256	6.6105	1.90581	1.69233	1.92169	1.52595	1.311	0.98821	0.529107	0.0503557	1	+	+	+	-	-	-	Exon (XR_003304358.1/102654134, exon 4 of 4)	2831910	2834339	2430	+	107964187	XR_003304413.1
NC_037641.1	4979208	4979594	4979398;4979389;4979364	117	76	136	42	154	84	102	87	63	72	51	67	7.50244	4.20035	6.38146	2.4424	7.9887	4.67245	5.63307	3.97848	3.25632	3.7303	2.63328	3.842	1.78615	2.61278	1.70975	1.41588	0.872938	0.685393	1.03835	0.0489589	1	+	+	+	-	-	-	Intron (XM_026440052.1/411046, intron 1 of 12)	4951908	4965636	13729	-	107964284	XM_026440047.1
NC_037641.1	7771889	7772385	7771991;7772110;7772123	119	87	143	87	142	77	114	113	98	101	72	88	7.6296	4.8004	6.70752	4.9984	7.37022	4.28766	6.28935	5.15394	5.03712	5.2122	3.69672	5.0285	1.58937	1.34193	1.71894	1.2203	0.96641	0.735154	0.670416	0.0345516	1	+	+	+	-	-	-	Intron (XM_026440188.1/100578579, intron 2 of 12)	7696988	7722232	25245	-	107964300	XR_001702734.2
NC_037643.1	3038254	3038672	3038454;3038483;3038483	106	79	109	57	146	57	91	76	81	75	68	60	6.80306	4.364	5.1238	3.2944	7.57638	3.18826	5.03148	3.48117	4.17216	3.8836	3.49416	3.4465	1.5589	1.55531	2.37634	1.44534	1.0743	1.01383	0.635863	0.124073	1	+	+	+	-	-	-	Distal Intergenic	3026217	3031255	5039	+	107964569	XR_001703293.2
NC_037643.1	7534799	7538532	7535411;7535828;7535175;7535599;7535838;7536299;7536938;7537275;7536427;7536843;7537431;7537899;7537720;7538012;7538483	792	465	670	393	1013	470	536	530	327	522	314	482	50.4189	25.4203	31.2552	22.3792	52.2616	25.8909	29.3685	24.0065	16.6886	26.7253	15.9516	27.2895	1.98341	1.39662	2.01853	1.22336	0.624449	0.584533	1.15023	0.0266993	1	+	+	+	-	-	-	5' UTR	7619574	7624380	4807	+	107964573	XR_001703306.2
NC_037643.1	5521621	5522105	5521860;5521859;5521887	102	72	188	63	151	75	61	82	69	77	52	79	6.54874	3.98215	8.80362	3.6352	7.83408	4.17772	3.39078	3.75243	3.5616	3.9858	2.68392	4.52	1.64452	2.42177	1.8752	0.903622	0.893572	0.593788	1.31322	0.0220945	1	+	+	+	-	-	-	Intron (XM_006561241.3/550870, intron 2 of 8)	5524064	5525453	1390	-	107964601	XR_001703417.2
NC_037644.1	10014676	10015066	10014875;10014850;10014955	136	57	102	53	108	50	72	52	65	41	35	54	8.71046	3.1639	4.79774	3.0672	5.61786	2.80347	3.99237	2.39613	3.35808	2.1462	1.82304	3.1075	2.75308	1.56421	2.0039	1.66617	1.56466	0.586658	0.727568	0.162928	1	+	+	+	-	-	-	Intron (XM_006565453.3/725329, intron 3 of 5)	10058425	10061594	3170	-	107964724	XR_001703665.2
NC_037644.1	10004117	10004542	10004290;10004331;10004385	111	63	135	65	132	54	106	92	86	69	52	60	7.12096	3.4912	6.33488	3.7488	6.85482	3.02335	5.85183	4.20453	4.42656	3.577	2.68392	3.4465	2.03969	1.68984	2.26729	1.39179	1.23751	0.778738	0.815258	0.026097	1	+	+	+	-	-	-	Intron (XM_006565453.3/725329, intron 3 of 5)	10058425	10061594	3170	-	107964724	XR_001703665.2
NC_037644.1	9998515	9999031	9998622;9998896;9998822;9998772	128	88	120	61	140	83	105	96	65	80	67	101	8.20182	4.85495	5.63618	3.5216	7.26714	4.61748	5.79714	4.38537	3.35808	4.1391	3.44352	5.763	1.68937	1.60046	1.57383	1.32193	0.811307	0.597522	0.832743	0.0768674	1	+	+	+	-	-	-	Intron (XM_006565453.3/725329, intron 3 of 5)	10058425	10061594	3170	-	107964724	XR_001703665.2
NC_037638.1	12940115	12940705	12940193;12940489;12940506;12940498	172	109	213	81	119	81	116	97	87	81	87	103	10.9993	6.0005	9.96812	4.6576	6.1848	4.50754	6.39873	4.43058	4.47744	4.1902	4.45632	5.876	1.83306	2.14018	1.3721	1.44422	1.06855	0.758393	0.70848	0.082426	1	+	+	+	-	-	-	Intron (XM_026445379.1/410718, intron 12 of 22)	12977554	12981652	4099	+	107964845	XM_016913580.2
NC_037645.1	8134892	8135699	8135152;8135430;8135444;8135157;8135412	255	117	337	111	357	119	94	97	90	102	148	118	16.2765	6.4369	15.744	6.3616	18.4513	6.5964	5.19555	4.43058	4.63008	5.2633	7.54536	6.7235	2.52862	2.47485	2.79718	1.17266	0.879691	1.12224	1.29703	0.000348936	1	+	+	+	-	-	-	Distal Intergenic	8109185	8112262	3078	-	107964868	XR_001704014.2
NC_037645.1	7970109	7970472	7970303;7970302;7970318	110	55	118	50	127	70	93	73	97	80	89	49	7.05738	3.0548	5.54302	2.8968	6.59712	3.90287	5.14086	3.34554	4.98624	4.1391	4.5576	2.825	2.31026	1.9135	1.69033	1.53663	1.20467	1.61331	0.441611	0.0859183	1	+	+	+	-	-	-	Distal Intergenic	8033163	8039697	6535	+	107964878	XR_001704034.2
NC_037645.1	8004327	8004807	8004556;8004622;8004618	159	73	145	63	146	83	120	103	91	77	80	59	10.1728	4.0367	6.80068	3.6352	7.57638	4.61748	6.61749	4.70184	4.68096	3.9858	4.10184	3.39	2.52008	1.87079	1.6408	1.40743	1.17441	1.20998	0.669668	0.0960006	1	+	+	+	-	-	-	Intron (XM_016913666.2/100577332, intron 5 of 7)	8033163	8039697	6535	+	107964878	XR_001704034.2
NC_037638.1	8309687	8310208	8309867;8309965;8309889	170	117	172	81	154	72	129	106	76	62	82	91	10.8722	6.4369	8.05834	4.6576	7.9887	4.01281	7.1097	4.83747	3.91776	3.2193	4.20312	5.198	1.68904	1.73015	1.9908	1.46971	1.21696	0.808603	0.630219	0.0611211	1	+	+	+	-	-	-	Intron (XM_026444045.1/408602, intron 2 of 14)	8317862	8326895	9034	-	107964879	XR_001704036.2
NC_037638.1	16740585	16740973	16740727;16740797;16740828	117	73	119	45	98	67	63	70	45	78	28	58	7.50244	4.0367	5.5896	2.6128	5.10246	3.73796	3.50016	3.20991	2.34048	4.0369	1.46856	3.3335	1.85856	2.13931	1.36504	1.09042	0.579772	0.440546	1.34527	0.0232888	1	+	+	+	-	-	-	Promoter (<=1kb)	16741326	16744168	2843	+	107964890	XR_001704049.2
NC_037638.1	16741590	16742039	16741821;16741776;16741800	117	88	161	44	138	77	91	74	39	82	25	66	7.50244	4.85495	7.54596	2.556	7.16406	4.28766	5.03148	3.39075	2.0352	4.2413	1.31664	3.7855	1.54532	2.95225	1.67086	1.48388	0.479853	0.347811	1.41604	0.0923797	1	+	+	+	-	-	-	Promoter (<=1kb)	16741326	16744168	2843	+	107964890	XR_001704049.2
NC_037647.1	9906569	9907229	9906765;9906800;9906805;9907101	187	131	201	61	184	109	134	118	119	120	117	113	11.953	7.2006	9.40916	3.5216	9.5349	6.0467	7.38315	5.37999	6.1056	6.1831	5.97552	6.441	1.66	2.67184	1.57688	1.37234	0.987466	0.927732	0.84584	0.117204	1	+	+	+	-	-	-	Promoter (1-2kb)	9905493	9906619	1127	+	107965051	XR_003305402.1
NC_037647.1	2857065	2857544	2857272;2857281;2857412	152	99	156	52	143	79	99	84	76	94	58	87	9.72774	5.455	7.31306	3.0104	7.42176	4.3976	5.469	3.84285	3.91776	4.8545	2.98776	4.972	1.78327	2.42927	1.68768	1.42316	0.807037	0.600917	1.0594	0.0395916	1	+	+	+	-	-	-	Promoter (1-2kb)	2855929	2858802	2874	-	107965072	XM_016914450.2
NC_037647.1	2888154	2888714	2888426;2888490;2888486	179	84	254	68	198	62	108	103	89	94	71	94	11.4444	4.63675	11.8779	3.9192	10.2565	3.46311	5.96121	4.70184	4.5792	4.8545	3.64608	5.3675	2.46819	3.0307	2.96164	1.26785	0.94329	0.679288	1.54947	0.00165224	1	+	+	+	-	-	-	Intron (XM_016914448.2/107965072, intron 1 of 2)	2855929	2893497	37569	-	107965072	XM_016914448.2
NC_037647.1	2883298	2884052	2883687;2883695;2883725	232	90	371	79	191	75	96	93	80	108	82	78	14.8141	4.96405	17.3278	4.544	9.89568	4.17772	5.30493	4.24974	4.12128	5.5699	4.20312	4.4635	2.98428	3.81334	2.36868	1.2483	0.73992	0.941665	1.6455	0.0274843	1	+	+	+	-	-	-	Intron (XM_016914448.2/107965072, intron 1 of 2)	2855929	2893497	37569	-	107965072	XM_016914448.2
NC_037647.1	3070991	3071446	3071210;3071250;3071258	121	72	192	52	187	40	104	116	66	73	54	78	7.75676	3.98215	8.98994	3.0104	9.68952	2.25377	5.74245	5.28957	3.40896	3.7814	2.7852	4.4635	1.94788	2.98629	4.29925	1.08562	0.901507	0.623995	1.8222	0.0781236	1	+	+	+	-	-	-	Distal Intergenic	3046486	3058669	12184	+	107965086	XR_001704562.2
NC_037647.1	1725524	1726204	1725825;1725647;1725622	147	86	148	52	188	61	118	129	97	123	75	113	9.40984	4.74585	6.94042	3.0104	9.74106	3.40814	6.50811	5.8773	4.98624	6.3364	3.84864	6.441	1.98275	2.30548	2.85817	1.10733	0.78692	0.597522	1.52005	0.0113063	1	+	+	+	-	-	-	Distal Intergenic	1736175	1737720	1546	-	107965105	XR_003305463.1
NC_037647.1	1724881	1725381	1725189;1725318;1725172;1725229	144	98	121	65	121	67	117	99	82	94	47	80	9.2191	5.40045	5.68276	3.7488	6.28788	3.73796	6.45342	4.521	4.22304	4.8545	2.43072	4.5765	1.7071	1.51589	1.68217	1.42743	0.869923	0.531131	0.794269	0.111214	1	+	+	+	-	-	-	Distal Intergenic	1736175	1737720	1546	-	107965105	XR_003305463.1
NC_037647.1	3731093	3731800	3731288;3731637;3731294;3731292	198	71	184	95	224	99	138	108	104	118	65	112	12.6524	3.9276	8.6173	5.4528	11.5965	5.497	7.60191	4.92789	5.3424	6.0809	3.34224	6.3845	3.22141	1.58034	2.10961	1.54263	0.878554	0.523493	1.23086	0.0937586	1	+	+	+	-	-	-	Distal Intergenic	3739604	3743177	3574	+	107965122	XR_003305488.1
NC_037648.1	12638119	12638566	12638323;12638296;12638343	122	84	149	48	154	79	94	74	73	98	66	85	7.82034	4.63675	6.987	2.7832	7.9887	4.3976	5.19555	3.39075	3.76512	5.0589	3.39288	4.859	1.6866	2.51042	1.8166	1.53227	0.744257	0.698267	1.01544	0.0531496	1	+	+	+	-	-	-	Intron (XM_006566373.3/552577, intron 2 of 8)	12650293	12660310	10018	+	107965147	XM_016914717.2
NC_037648.1	14106143	14106530	14106336;14106339;14106360	124	78	169	78	144	38	74	86	88	64	68	56	7.9475	4.30945	7.9186	4.4872	7.4733	2.14383	4.10175	3.93327	4.52832	3.3215	3.49416	3.2205	1.8442	1.76471	3.48596	1.04283	1.36334	1.08497	1.02308	0.161859	1	+	+	+	-	-	-	Intron (XM_006566532.3/410259, intron 9 of 12)	14099941	14103139	3199	+	107965165	XR_001704741.2
NC_037648.1	14113441	14113983	14113668;14113727;14113634	132	85	136	58	127	76	82	83	87	82	74	78	8.45614	4.6913	6.38146	3.3512	6.59712	4.23269	4.53927	3.79764	4.47744	4.2413	3.798	4.4635	1.80252	1.90423	1.55861	1.19529	1.05568	0.850902	0.763396	0.00732143	1	+	+	+	-	-	-	Exon (XM_006566532.3/410259, exon 8 of 13)	14099941	14103139	3199	+	107965165	XR_001704741.2
NC_037648.1	14125051	14126204	14125277;14125298;14126053;14125240	322	163	308	160	330	156	174	198	128	171	118	152	20.5363	8.9462	14.3932	9.1448	17.0597	8.63029	9.57075	8.99679	6.56352	8.7892	6.02616	8.6445	2.29553	1.57392	1.97672	1.0638	0.746771	0.697109	1.22114	0.0171194	1	+	+	+	-	-	-	Intron (XM_006566532.3/410259, intron 5 of 12)	14099941	14103139	3199	+	107965165	XR_001704741.2
NC_037649.1	8958637	8959154	8958949;8958963;8958948	154	66	149	84	157	76	103	91	88	87	44	84	9.8549	3.65485	6.987	4.828	8.14332	4.23269	5.68776	4.15932	4.52832	4.4968	2.2788	4.8025	2.69639	1.44718	1.92391	1.36747	1.00701	0.474503	1.09065	0.0811763	1	+	+	+	-	-	-	Exon (XR_001705220.2/102653706, exon 3 of 6)	8962719	8963830	1112	+	107965355	XR_001705216.2
NC_037649.1	8968179	8969404	8968382;8968435;8968855;8969102;8969064	303	176	231	125	335	185	221	192	160	195	124	177	19.3283	9.65535	10.8066	7.1568	17.3174	10.2244	12.1412	8.72553	8.19168	10.0156	6.33	10.057	2.00182	1.50998	1.69373	1.39146	0.817892	0.629412	0.874784	0.0536419	1	+	+	+	-	-	-	Intron (XM_026444488.1/726709, intron 21 of 33)	8962719	8963830	1112	+	107965355	XR_001705216.2
NC_037649.1	4437477	4438128	4437640;4437670;4437716	101	70	219	57	144	90	74	106	77	91	52	86	6.48516	3.87305	10.2476	3.2944	7.4733	5.00227	4.10175	4.83747	3.96864	4.7012	2.68392	4.9155	1.67443	3.11061	1.49398	0.847912	0.844176	0.546012	1.48827	0.114007	1	+	+	+	-	-	-	Intron (XR_003305859.1/113219153, intron 2 of 4)	4426124	4427263	1140	-	107965378	XM_016915606.2
NC_037650.1	5886007	5886567	5886276;5886229;5886305	139	88	178	79	166	89	106	84	102	87	43	60	8.9012	4.85495	8.33782	4.544	8.60718	4.9473	5.85183	3.84285	5.24064	4.4968	2.22816	3.4465	1.83343	1.83491	1.73977	1.52278	1.16542	0.646499	0.697568	0.110833	1	+	+	+	-	-	-	Exon (XM_026444852.1/100578957, exon 4 of 6)	5878008	5883119	5112	+	107965414	XR_003306009.1
NC_037651.1	1737383	1737813	1737617;1737609;1737622	90	61	154	72	120	60	77	87	45	108	51	74	5.78578	3.3821	7.2199	4.1464	6.23634	3.35317	4.26582	3.97848	2.34048	5.5699	2.63328	4.2375	1.71071	1.74125	1.85983	1.07222	0.420201	0.621423	1.32933	0.025992	1	+	+	+	-	-	-	Exon (XM_026444916.1/409711, exon 8 of 19)	1759121	1759429	309	+	107965470	XM_016915994.2
NC_037651.1	4592199	4592599	4592421;4592395;4592416	127	77	122	41	135	78	109	93	50	66	59	61	8.13824	4.2549	5.72934	2.3856	7.00944	4.34263	6.0159	4.24974	2.59488	3.4237	3.0384	3.503	1.91267	2.40163	1.6141	1.41559	0.757917	0.867371	0.963156	0.0356094	1	+	+	+	-	-	-	Exon (XM_006560181.3/408444, exon 27 of 34)	4594920	4596302	1383	-	107965509	XR_001705541.2
NC_037652.1	8880849	8882522	8881125;8882049;8881282;8881320;8882019	392	246	369	199	461	176	368	297	208	250	178	220	24.9869	13.4739	17.2346	11.36	23.8115	9.72969	20.1806	13.4726	10.6339	12.8261	9.06456	12.4865	1.85447	1.51713	2.4473	1.4979	0.829083	0.725949	0.930551	0.0652684	1	+	+	+	-	-	-	Distal Intergenic	8903129	8905395	2267	-	107965612	XR_003306181.1
NC_037653.1	971101	971454	971252;971292;971299	87	56	104	34	83	46	93	85	76	82	53	59	5.59504	3.10935	4.8909	1.988	4.32936	2.58359	5.14086	3.88806	3.91776	4.2413	2.73456	3.39	1.79942	2.46021	1.67571	1.32222	0.923717	0.806655	0.9593	0.0372886	1	+	+	+	-	-	-	Exon (XM_026445914.1/726424, exon 10 of 12)	937217	965758	28542	-	107965660	XR_003306340.1
NC_037647.1	8918580	8919380	8918799;8919304;8918826;8918905	181	118	197	102	248	111	125	133	74	124	109	99	11.5716	6.49145	9.22284	5.8504	12.8335	6.15664	6.89094	6.05814	3.816	6.3875	5.5704	5.65	1.78259	1.57645	2.0845	1.13747	0.597417	0.985912	1.00051	0.0143793	1	+	+	+	-	-	-	Distal Intergenic	8953285	8957575	4291	+	113218545	XM_026443371.1
NC_037647.1	8939068	8940344	8939218;8939845;8939403;8939497;8939919	249	170	263	119	359	154	253	233	153	195	118	187	15.895	9.32805	12.2971	6.816	18.5544	8.52035	13.8913	10.5791	7.83552	10.0156	6.02616	10.622	1.704	1.80415	2.17766	1.31309	0.782332	0.567328	1.09445	0.0249586	1	+	+	+	-	-	-	Distal Intergenic	8953285	8957575	4291	+	113218545	XM_026443371.1
NC_037650.1	4614022	4615590	4614186;4614434;4615049;4615309;4615410;4614482;4615067	342	255	279	182	383	196	247	211	190	273	148	217	21.8079	13.9648	13.0424	10.3944	19.7914	10.8291	13.5631	9.58452	9.71808	14.0014	7.54536	12.317	1.56163	1.25475	1.82761	1.4151	0.694079	0.612597	0.770817	0.114205	1	+	+	+	-	-	-	Exon (XM_016915808.2/408420, exon 10 of 15)	4626399	4665203	38805	+	113218548	XM_026444843.1
NC_037639.1	9962283	9963107	9962372;9962937;9962851;9962904	165	97	257	105	199	105	128	125	161	100	138	86	10.5543	5.3459	12.0176	6.0208	10.308	5.82682	7.05501	5.69646	8.24256	5.1611	7.03896	4.9155	1.97428	1.99601	1.76906	1.23849	1.59705	1.43199	0.427484	0.0219753	1	+	+	+	-	-	-	Promoter (<=1kb)	9954462	9962804	8343	-	113218601	XR_003304193.1
NC_037639.1	498595	499015	498986;498802;498822	86	68	136	65	100	55	78	86	65	85	45	58	5.53146	3.76395	6.38146	3.7488	5.20554	3.07832	4.32051	3.93327	3.35808	4.3946	2.32944	3.3335	1.46959	1.70227	1.69103	1.09845	0.764138	0.698797	0.924888	0.0102193	1	+	+	+	-	-	-	Intron (XM_026439195.1/724319, intron 1 of 6)	472575	474735	2161	-	113218607	XR_003304209.1
NC_037640.1	10183956	10185258	10184192;10184930;10184907;10184919	255	168	483	126	295	158	169	197	225	193	209	170	16.2765	9.21895	22.5447	7.2136	15.2558	8.74023	9.2973	8.95158	11.4989	9.9134	10.6344	9.6615	1.76555	3.1253	1.74547	1.03862	1.15994	1.1007	1.00824	0.134364	1	+	+	+	-	-	-	Intron (XM_006567953.3/551168, intron 1 of 22)	10177592	10191411	13820	-	113218629	XR_003304282.1
NC_037640.1	12210495	12210958	12210653;12210757;12210788	106	59	171	66	109	68	90	109	82	72	97	70	6.80306	3.273	8.01176	3.8056	5.6694	3.79293	4.97679	4.9731	4.22304	3.7303	4.96272	4.0115	2.07854	2.10526	1.49473	1.00074	1.13209	1.23712	0.752786	0.048758	1	+	+	+	-	-	-	Promoter (<=1kb)	12210096	12211413	1318	+	113218669	XR_003304443.1
NC_037641.1	8294614	8295030	8294806;8294891;8294841	132	79	118	60	147	55	98	104	54	79	41	74	8.45614	4.364	5.54302	3.4648	7.62792	3.07832	5.41431	4.74705	2.7984	4.088	2.12688	4.2375	1.9377	1.59981	2.47795	1.14056	0.68454	0.501919	1.37019	0.0210792	1	+	+	+	-	-	-	Intron (XR_001702723.2/100576283, intron 2 of 4)	8311172	8315012	3841	-	113218722	XR_003304526.1
NC_037641.1	8562481	8562769	8562618;8562622;8562626	80	44	92	41	82	38	81	71	85	46	45	44	5.14998	2.45475	4.33194	2.3856	4.27782	2.14383	4.48458	3.25512	4.37568	2.4017	2.32944	2.5425	2.09797	1.81587	1.99541	1.3777	1.82191	0.916201	0.521797	0.139752	1	+	+	+	-	-	-	Intron (XM_026440328.1/724830, intron 1 of 6)	8536837	8547595	10759	+	113218738	XM_026440337.1
NC_037641.1	4100285	4100755	4100491;4100544;4100602	95	65	149	58	128	69	89	92	76	81	83	81	6.10368	3.6003	6.987	3.3512	6.64866	3.8479	4.9221	4.20453	3.91776	4.1902	4.25376	4.633	1.69533	2.08492	1.72787	1.17067	0.934982	0.918144	0.865201	0.00789975	1	+	+	+	-	-	-	Intron (XM_006558671.3/411054, intron 2 of 11)	4158690	4167669	8980	+	113218749	XR_003304599.1
NC_037641.1	4101692	4102185	4101945;4101903;4101911	98	69	202	72	156	74	72	81	76	72	78	51	6.29442	3.8185	9.45574	4.1464	8.09178	4.12275	3.99237	3.70722	3.91776	3.7303	4.00056	2.938	1.6484	2.28047	1.96271	1.07692	1.05025	1.36166	0.755912	0.0292096	1	+	+	+	-	-	-	Intron (XM_006558671.3/411054, intron 2 of 11)	4158690	4167669	8980	+	113218749	XR_003304599.1
NC_037641.1	4102508	4103073	4102841;4102829;4102834	116	54	224	32	105	38	54	56	50	69	59	49	7.43886	3.00025	10.4805	1.8744	5.46324	2.14383	3.00795	2.57697	2.59488	3.577	3.0384	2.825	2.47941	5.59139	2.54836	1.16724	0.725435	1.07554	1.839	0.128511	1	+	+	+	-	-	-	Intron (XM_006558671.3/411054, intron 2 of 11)	4158690	4167669	8980	+	113218749	XR_003304599.1
NC_037641.1	4116576	4116959	4116740;4116859;4116814	104	57	105	47	100	50	50	85	54	74	38	43	6.6759	3.1639	4.93748	2.7264	5.20554	2.80347	2.78919	3.88806	2.7984	3.8325	1.97496	2.486	2.11002	1.81099	1.85682	0.717373	0.730176	0.794433	1.36575	0.00407247	1	+	+	+	-	-	-	Intron (XM_006558671.3/411054, intron 2 of 11)	4158690	4167669	8980	+	113218749	XR_003304599.1
NC_037641.1	6331913	6332352	6332111;6332092;6332127	136	53	157	61	121	74	100	94	99	93	93	88	8.71046	2.9457	7.35964	3.5216	6.28788	4.12275	5.52369	4.29495	5.088	4.8034	4.76016	5.0285	2.95701	2.08986	1.52517	1.28609	1.05925	0.946636	0.997386	0.112495	1	+	+	+	-	-	-	Intron (XM_026440483.1/100576383, intron 2 of 8)	6319326	6319540	215	-	113218754	XR_003304634.1
NC_037641.1	6322923	6323414	6323136;6323032;6323395;6323160	120	85	152	86	211	86	89	69	70	81	92	64	7.69318	4.6913	7.12674	4.9416	10.9265	4.78239	4.9221	3.1647	3.61248	4.1902	4.70952	3.6725	1.63988	1.44219	2.28474	1.55531	0.862126	1.28237	0.536613	0.165798	1	+	+	+	-	-	-	Intron (XM_026440483.1/100576383, intron 2 of 8)	6319326	6319540	215	-	113218754	XR_003304634.1
NC_037642.1	7287319	7287795	7287543;7287655;7287607	131	92	149	70	170	72	91	97	104	106	52	89	8.39256	5.07315	6.987	4.0328	8.81334	4.01281	5.03148	4.43058	5.3424	5.4677	2.68392	5.085	1.65431	1.73254	2.1963	1.13563	0.977084	0.527811	1.08026	0.0170288	1	+	+	+	-	-	-	Intron (XM_006564194.3/551776, intron 1 of 4)	7274184	7274646	463	+	113218790	XM_026440905.1
NC_037642.1	5208214	5208702	5208534;5208542;5208544	95	61	129	66	145	54	109	67	99	85	72	71	6.10368	3.3821	6.0554	3.8056	7.52484	3.02335	6.0159	3.07428	5.088	4.3946	3.69672	4.068	1.8047	1.59118	2.48891	1.95685	1.15778	0.908732	0.548589	0.211948	1	+	+	+	-	-	-	Promoter (2-3kb)	5206457	5211139	4683	-	113218801	XR_003304737.1
NC_037642.1	2319651	2320160	2319733;2319787;2319996	106	75	124	66	103	86	112	114	77	93	56	65	6.80306	4.1458	5.8225	3.8056	5.36016	4.78239	6.17997	5.19915	3.96864	4.8034	2.88648	3.729	1.64095	1.52998	1.12081	1.18865	0.826215	0.774063	0.621854	0.0732146	1	+	+	+	-	-	-	Distal Intergenic	2308653	2308760	108	-	113218817	XR_003304763.1
NC_037643.1	17053349	17053785	17053529;17053512;17053545	118	55	140	71	104	57	81	89	60	62	58	48	7.56602	3.0548	6.56778	4.0896	5.4117	3.18826	4.48458	4.0689	3.10368	3.2193	2.98776	2.7685	2.47676	1.60597	1.69738	1.10216	0.964085	1.0792	0.877836	0.0830393	1	+	+	+	-	-	-	Promoter (1-2kb)	17050640	17052205	1566	-	113218835	XR_003304835.1
NC_037644.1	12607217	12607740	12607447;12607468;12607473	125	94	212	62	145	96	72	91	90	88	42	66	8.01108	5.18225	9.92154	3.5784	7.52484	5.33209	3.99237	4.15932	4.63008	4.5479	2.17752	3.7855	1.54587	2.77262	1.41124	0.959861	1.01807	0.575227	1.16618	0.12374	1	+	+	+	-	-	-	Intron (XM_016913010.2/408915, intron 3 of 8)	12611044	12612171	1128	+	113218889	XR_003304989.1
NC_037644.1	9870151	9870595	9870380;9870403;9870424	120	66	113	40	194	70	85	74	44	89	58	91	7.69318	3.65485	5.31012	2.3288	10.0503	3.90287	4.70334	3.39075	2.2896	4.599	2.98776	5.198	2.10492	2.2802	2.5751	1.38711	0.497847	0.57479	1.50062	0.0193658	1	+	+	+	-	-	-	Intron (XM_006565453.3/725329, intron 3 of 5)	9852776	9858636	5861	+	113218893	XR_003305002.1
NC_037644.1	10182869	10183689	10183081;10183459;10183026;10183392	245	137	227	106	292	117	191	159	115	134	125	122	15.6407	7.5279	10.6202	6.0776	15.1012	6.48646	10.5005	7.2336	5.90208	6.8985	6.38064	6.9495	2.0777	1.74743	2.32811	1.45163	0.85556	0.918144	0.931899	0.0186695	1	+	+	+	-	-	-	3' UTR	10166236	10175388	9153	-	113218894	XR_003305004.1
NC_037638.1	12464366	12464771	12464560;12464568;12464633	93	56	142	28	108	44	82	53	80	41	70	45	5.97652	3.10935	6.66094	1.6472	5.61786	2.47365	4.53927	2.44134	4.12128	2.1462	3.59544	2.599	1.92211	4.0438	2.27108	1.85934	1.92027	1.38339	0.673908	0.255774	1	+	+	+	-	-	-	Intron (XM_026441938.1/725190, intron 1 of 3)	12461591	12468303	6713	-	113218910	XR_003305064.1
NC_037645.1	3918733	3919119	3918931;3918950;3918922	93	37	165	55	160	50	75	59	41	40	42	61	5.97652	2.0729	7.73228	3.1808	8.29794	2.80347	4.15644	2.7126	2.13696	2.0951	2.17752	3.503	2.88317	2.43092	2.95988	1.53227	1.01998	0.621616	1.38234	0.00889623	1	+	+	+	-	-	-	Promoter (1-2kb)	3913490	3917351	3862	-	113218949	XR_003305205.1
NC_037646.1	2306854	2307692	2307254;2307293;2307247	233	101	371	84	355	133	132	152	103	107	98	111	14.8777	5.5641	17.3278	4.828	18.3482	7.36598	7.27377	6.91713	5.29152	5.5188	5.01336	6.328	2.67387	3.58902	2.49094	1.05156	0.958817	0.79225	1.64314	0.0236113	1	+	+	+	-	-	-	Intron (XM_006558129.3/413382, intron 1 of 16)	2298281	2340735	42455	-	113218975	XR_003305281.1
NC_037646.1	2256214	2256542	2256361;2256380;2256378	104	72	112	43	112	53	102	78	66	58	67	48	6.6759	3.98215	5.26354	2.4992	5.82402	2.96838	5.63307	3.57159	3.40896	3.0149	3.44352	2.7685	1.67646	2.10609	1.96202	1.57719	1.1307	1.24382	0.539719	0.0316599	1	+	+	+	-	-	-	Intron (XM_006558129.3/413382, intron 1 of 16)	2298281	2340735	42455	-	113218975	XR_003305281.1
NC_037638.1	4334909	4335439	4335220;4335237;4335229	90	32	103	56	115	49	80	69	58	77	70	51	5.78578	1.80015	4.84432	3.2376	5.97864	2.7485	4.42989	3.1647	3.00192	3.9858	3.59544	2.938	3.21405	1.49627	2.17524	1.39978	0.753154	1.22377	1.02796	0.131215	1	+	+	+	-	-	-	Intron (XM_026442676.1/408618, intron 2 of 15)	4345801	4347796	1996	+	113218984	XR_003305307.1
NC_037646.1	11672423	11673188	11672683;11672663;11672682	239	122	254	104	373	105	87	136	91	113	54	77	15.2592	6.70965	11.8779	5.964	19.276	5.82682	4.81272	6.19377	4.68096	5.8254	2.7852	4.407	2.27422	1.9916	3.30815	0.777026	0.803543	0.631995	1.77533	0.0444826	1	+	+	+	-	-	-	Promoter (2-3kb)	11673538	11675728	2191	-	113218990	XM_026442763.1
NC_037647.1	10143295	10143776	10143538;10143452;10143519	155	83	164	73	123	68	102	91	93	81	83	76	9.91848	4.5822	7.6857	4.2032	6.39096	3.79293	5.63307	4.15932	4.78272	4.1902	4.25376	4.3505	2.16457	1.82854	1.68497	1.35432	1.14141	0.977763	0.709013	0.0169058	1	+	+	+	-	-	-	Intron (XM_001121210.5/725350, intron 1 of 5)	10133223	10133683	461	+	113219043	XR_003305465.1
NC_037647.1	10144132	10144516	10144301;10144297;10144364	111	43	119	54	116	25	91	72	60	59	61	61	7.12096	2.4002	5.5896	3.124	6.03018	1.42922	5.03148	3.30033	3.10368	3.066	3.13968	3.503	2.96682	1.78924	4.21921	1.52454	1.01229	0.896283	1.38644	0.110149	1	+	+	+	-	-	-	Intron (XM_001121210.5/725350, intron 1 of 5)	10133223	10133683	461	+	113219043	XR_003305465.1
NC_037647.1	3720082	3720562	3720264;3720336;3720297	116	69	169	56	113	63	40	78	45	63	38	59	7.43886	3.8185	7.9186	3.2376	5.87556	3.51808	2.24229	3.57159	2.34048	3.2704	1.97496	3.39	1.94811	2.44582	1.6701	0.627813	0.715656	0.582584	1.65463	0.0233074	1	+	+	+	-	-	-	Distal Intergenic	3711992	3716985	4994	+	113219051	XR_003305489.1
NC_037647.1	3720799	3721438	3721052;3721061;3721152	222	82	195	101	216	62	104	118	64	98	71	110	14.1783	4.52765	9.12968	5.7936	11.1842	3.46311	5.74245	5.37999	3.3072	5.0589	3.64608	6.2715	3.13149	1.57582	3.22952	1.06737	0.653739	0.581373	1.78537	0.0631883	1	+	+	+	-	-	-	Distal Intergenic	3711992	3716985	4994	+	113219051	XR_003305489.1
NC_037647.1	2895385	2895688	2895509;2895532;2895534	96	58	115	49	104	36	61	45	41	26	34	41	6.16726	3.21845	5.40328	2.84	5.4117	2.03389	3.39078	2.07966	2.13696	1.3797	1.7724	2.373	1.91622	1.90256	2.66076	1.63045	1.54886	0.746903	0.722756	0.0879012	1	+	+	+	-	-	-	Promoter (1-2kb)	2893565	2898392	4828	+	113219057	XR_003305508.1
NC_037647.1	6876137	6876611	6876303;6876393;6876504	93	62	131	68	115	78	84	79	47	72	68	81	5.97652	3.43665	6.14856	3.9192	5.97864	4.34263	4.64865	3.6168	2.44224	3.7303	3.49416	4.633	1.73905	1.56883	1.37673	1.28529	0.654703	0.75419	0.798081	0.0567948	1	+	+	+	-	-	-	Intron (XM_016914369.2/726469, intron 10 of 13)	6864040	6864190	151	+	113219063	XR_003305542.1
NC_037638.1	8652352	8652806	8652572;8652568;8652713	129	92	119	60	181	62	99	82	72	65	38	48	8.2654	5.07315	5.5896	3.4648	9.38028	3.46311	5.469	3.75243	3.71424	3.3726	1.97496	2.7685	1.62924	1.61325	2.70863	1.45746	1.1013	0.713368	0.862936	0.117268	1	+	+	+	-	-	-	Promoter (2-3kb)	8652397	8654843	2447	-	113219090	XR_003305622.1
NC_037648.1	11824599	11825035	11824747;11824761;11824793	126	44	117	45	145	65	82	47	74	69	41	51	8.07466	2.45475	5.49644	2.6128	7.52484	3.62802	4.53927	2.17008	3.816	3.577	2.12688	2.938	3.2894	2.10366	2.07409	2.09175	1.06682	0.723921	0.943576	0.105707	1	+	+	+	-	-	-	Distal Intergenic	11809624	11820195	10572	-	113219092	XM_026443740.1
NC_037648.1	11801967	11802484	11802156;11802246;11802267	110	78	144	46	132	80	101	76	67	83	63	67	7.05738	4.30945	6.7541	2.6696	6.85482	4.45257	5.57838	3.48117	3.45984	4.2924	3.24096	3.842	1.63765	2.53	1.53952	1.60244	0.806039	0.843561	0.811431	0.118035	1	+	+	+	-	-	-	Distal Intergenic	11809624	11820195	10572	-	113219092	XM_026443740.1
NC_037648.1	11790549	11791225	11790731;11790968;11790850	197	128	193	92	214	103	122	144	58	98	65	124	12.5888	7.03695	9.03652	5.2824	11.0811	5.71688	6.72687	6.55545	3.00192	5.0589	3.34224	7.0625	1.78896	1.71068	1.93831	1.02615	0.593394	0.473238	1.37764	0.0126188	1	+	+	+	-	-	-	Distal Intergenic	11809624	11820195	10572	-	113219092	XM_026443740.1
NC_037648.1	11711422	11712278	11711544;11711992;11711552;11711870;11711983;11711838	228	160	196	123	252	127	174	173	121	162	75	113	14.5598	8.78255	9.17626	7.0432	13.0396	7.03616	9.57075	7.86654	6.20736	8.3293	3.84864	6.441	1.65781	1.30285	1.85323	1.21664	0.745244	0.597522	0.911394	0.0391895	1	+	+	+	-	-	-	Intron (XR_003305634.1/113219097, intron 2 of 2)	11702467	11741605	39139	+	113219097	XR_003305633.1
NC_037648.1	13390424	13391032	13390631;13390769;13390825	177	80	176	86	192	69	61	80	54	70	54	64	11.3172	4.41855	8.24466	4.9416	9.94722	3.8479	3.39078	3.66201	2.7984	3.6281	2.7852	3.6725	2.56129	1.66842	2.5851	0.925934	0.771313	0.758393	1.47258	0.0369474	1	+	+	+	-	-	-	Promoter (1-2kb)	13386799	13388971	2173	-	113219099	XR_003305636.1
NC_037648.1	1540264	1540711	1540429;1540485;1540489	144	70	127	39	118	65	86	75	68	76	49	60	9.2191	3.87305	5.96224	2.272	6.13326	3.62802	4.75803	3.43596	3.51072	3.9347	2.532	3.4465	2.38032	2.62423	1.69053	1.38477	0.892246	0.734658	1.15253	0.0274889	1	+	+	+	-	-	-	Intron (XM_006558933.3/410299, intron 7 of 13)	1563316	1569909	6594	+	113219132	XR_003305787.1
NC_037648.1	1588569	1588989	1588765;1588775;1588837	93	64	146	64	157	45	74	63	49	64	64	64	5.97652	3.54575	6.84726	3.692	8.14332	2.52862	4.10175	2.89344	2.544	3.3215	3.2916	3.6725	1.68554	1.85462	3.22046	1.4176	0.765919	0.896283	1.13432	0.112937	1	+	+	+	-	-	-	Intron (XM_006558933.3/410299, intron 6 of 13)	1563316	1569909	6594	+	113219132	XR_003305787.1
NC_037648.1	825809	826583	826030;826051;826075	148	144	213	111	226	109	112	138	75	134	72	114	9.47342	7.90975	9.96812	6.3616	11.6996	6.0467	6.17997	6.28419	3.86688	6.8985	3.69672	6.4975	1.19769	1.56692	1.93487	0.983416	0.560539	0.568945	1.15328	0.0346149	1	+	+	+	-	-	-	Exon (XM_026443902.1/725243, exon 3 of 4)	829871	833847	3977	-	113219139	XR_003305800.1
NC_037649.1	727030	727475	727256;727292;727285	147	73	161	62	129	57	49	89	40	76	26	59	9.40984	4.0367	7.54596	3.5784	6.7002	3.18826	2.7345	4.0689	2.08608	3.9347	1.36728	3.39	2.33107	2.10875	2.10152	0.672049	0.530175	0.403327	2.02652	0.000109574	1	+	+	+	-	-	-	Intron (XR_003305813.1/413211, intron 1 of 3)	714634	716877	2244	-	113219165	XR_003305900.1
NC_037649.1	725894	726495	726194;726220;726186	253	99	280	106	229	74	86	102	54	96	32	95	16.1493	5.455	13.089	6.0776	11.8542	4.12275	4.75803	4.65663	2.7984	4.9567	1.67112	5.424	2.96046	2.15365	2.87531	1.02178	0.564569	0.308097	2.07632	0.00403044	1	+	+	+	-	-	-	Intron (XR_003305813.1/413211, intron 1 of 3)	714634	716877	2244	-	113219165	XR_003305900.1
NC_037649.1	719935	720806	720165;720573;720547;720559	127	108	409	84	156	92	66	112	87	124	70	83	8.13824	5.94595	19.0978	4.828	8.09178	5.11221	3.66423	5.10873	4.47744	6.3875	3.59544	4.746	1.3687	3.95563	1.58283	0.717249	0.700969	0.757573	1.66656	0.197382	1	+	+	+	-	-	-	Intron (XR_003305813.1/413211, intron 1 of 3)	714634	716877	2244	-	113219165	XR_003305900.1
NC_037649.1	717486	719228	717760;718332;718967;717709;717761;718955;718969	392	183	716	194	464	172	118	224	133	201	130	170	24.9869	10.0372	33.3979	11.076	23.9661	9.50981	6.50811	10.1723	6.81792	10.3222	6.63384	9.6615	2.48943	3.01534	2.52014	0.639787	0.66051	0.686626	2.01395	0.00681633	1	+	+	+	-	-	-	Promoter (<=1kb)	714634	716877	2244	-	113219165	XR_003305900.1
NC_037649.1	715405	716530	715906;715886;715850	316	133	683	120	302	124	121	170	100	153	85	130	20.1549	7.3097	31.8607	6.8728	15.6166	6.87125	6.67218	7.73091	5.13888	7.8694	4.35504	7.4015	2.75728	4.63577	2.27275	0.863052	0.653021	0.5884	2.19943	0.0710701	1	+	+	+	-	-	-	Promoter (<=1kb)	714634	716877	2244	-	113219165	XR_003305900.1
NC_037649.1	4773860	4774391	4774127;4774153;4774136	110	45	212	57	113	60	78	64	56	64	50	67	7.05738	2.5093	9.92154	3.2944	5.87556	3.35317	4.32051	2.93865	2.90016	3.3215	2.58264	3.842	2.81249	3.01164	1.75224	1.47024	0.873148	0.672212	1.32906	0.038974	1	+	+	+	-	-	-	Intron (XM_016915530.2/413125, intron 2 of 6)	4786360	4789339	2980	-	113219167	XR_003305906.1
NC_037638.1	7660946	7661674	7661431;7661441;7661468	184	108	306	98	215	106	102	103	85	72	69	101	11.7623	5.94595	14.3001	5.6232	11.1326	5.88179	5.63307	4.70184	4.37568	3.7303	3.5448	5.763	1.9782	2.54305	1.89272	1.19806	1.17301	0.615096	1.10293	0.0150549	1	+	+	+	-	-	-	Intron (XM_026444616.1/113219185, intron 1 of 4)	7220111	7711294	491184	-	113219185	XM_026444616.1
NC_037638.1	7660428	7660737	7660577;7660590;7660591	132	69	115	52	112	46	54	86	43	62	26	40	8.45614	3.8185	5.40328	3.0104	5.82402	2.58359	3.00795	3.93327	2.23872	3.2193	1.36728	2.3165	2.21452	1.79487	2.25424	0.764745	0.695406	0.590235	1.6111	0.00594555	1	+	+	+	-	-	-	Intron (XM_026444616.1/113219185, intron 1 of 4)	7220111	7711294	491184	-	113219185	XM_026444616.1
NC_037638.1	21548669	21549046	21548885;21548867;21548870	120	67	124	56	130	55	84	60	47	54	28	61	7.69318	3.7094	5.8225	3.2376	6.75174	3.07832	4.64865	2.75781	2.44224	2.8105	1.46856	3.503	2.07397	1.7984	2.19332	1.68563	0.86897	0.419229	1.02835	0.097526	1	+	+	+	-	-	-	Promoter (<=1kb)	21549963	21562535	12573	+	113219189	XR_003305941.1
NC_037638.1	21582652	21583230	21582927;21582972;21582892	213	71	193	82	237	64	109	87	104	81	67	69	13.6061	3.9276	9.03652	4.7144	12.2665	3.57305	6.0159	3.97848	5.3424	4.1902	3.44352	3.955	3.46423	1.91679	3.43306	1.51211	1.27497	0.870675	1.26885	0.0641522	1	+	+	+	-	-	-	Intron (XM_003251682.4/410674, intron 6 of 10)	21549963	21562535	12573	+	113219189	XR_003305941.1
NC_037638.1	21583702	21584123	21583877;21583930;21583941	116	58	121	54	132	57	63	69	45	62	47	41	7.43886	3.21845	5.68276	3.124	6.85482	3.18826	3.50016	3.1647	2.34048	3.2193	2.43072	2.373	2.31132	1.81907	2.15002	1.106	0.727015	1.02432	1.13618	0.00413172	1	+	+	+	-	-	-	Intron (XM_003251682.4/410674, intron 6 of 10)	21549963	21562535	12573	+	113219189	XR_003305941.1
NC_037650.1	5297738	5298103	5297924;5297864;5298023	102	64	126	56	139	52	94	70	52	54	59	63	6.54874	3.54575	5.91566	3.2376	7.2156	2.91341	5.19555	3.20991	2.69664	2.8105	3.0384	3.616	1.84693	1.82717	2.47669	1.6186	0.959488	0.840265	0.847471	0.0485371	1	+	+	+	-	-	-	3' UTR	5290290	5291562	1273	-	113219200	XR_003305969.1
NC_037650.1	8485574	8486061	8485820;8485785;8485837	180	80	171	63	179	72	108	101	90	84	78	98	11.508	4.41855	8.01176	3.6352	9.2772	4.01281	5.96121	4.61142	4.63008	4.3435	4.00056	5.5935	2.60447	2.20394	2.3119	1.29271	1.06598	0.715216	1.21187	0.00399636	1	+	+	+	-	-	-	Intron (XR_003305984.1/102655449, intron 2 of 5)	8511075	8514461	3387	-	113219212	XR_003305987.1
NC_037650.1	8484176	8484529	8484315;8484327;8484380	107	63	111	60	126	65	73	67	74	67	37	66	6.86664	3.4912	5.21696	3.4648	6.54558	3.62802	4.04706	3.07428	3.816	3.4748	1.92432	3.7855	1.96684	1.5057	1.80417	1.31643	1.09819	0.50834	0.852212	0.0623831	1	+	+	+	-	-	-	Intron (XR_003305984.1/102655449, intron 2 of 5)	8511075	8514461	3387	-	113219212	XR_003305987.1
NC_037650.1	8466716	8467252	8467087;8466968;8467133	143	79	159	75	166	65	112	106	114	110	72	97	9.15552	4.364	7.4528	4.3168	8.60718	3.62802	6.17997	4.83747	5.8512	5.6721	3.69672	5.537	2.09797	1.72646	2.37242	1.27752	1.03158	0.66764	1.0578	0.0141769	1	+	+	+	-	-	-	Intron (XR_003305984.1/102655449, intron 3 of 5)	8511075	8514461	3387	-	113219212	XR_003305987.1
NC_037650.1	5761626	5762089	5761845;5761859;5761934	117	63	142	51	175	76	95	94	51	91	52	73	7.50244	3.4912	6.66094	2.9536	9.07104	4.23269	5.25024	4.29495	2.64576	4.7012	2.68392	4.181	2.14896	2.25519	2.14309	1.22242	0.562784	0.641933	1.43163	0.0196079	1	+	+	+	-	-	-	Promoter (<=1kb)	5762829	5767530	4702	+	113219215	XR_003306002.1
NC_037652.1	8568817	8569345	8568959;8569108;8569259	116	94	138	65	148	51	116	98	92	79	116	78	7.43886	5.18225	6.47462	3.7488	7.67946	2.85844	6.39873	4.47579	4.73184	4.088	5.92488	4.4635	1.43545	1.72712	2.68659	1.42963	1.1575	1.32741	0.579389	0.226757	1	+	+	+	-	-	-	Exon (XM_016916568.2/726948, exon 7 of 13)	8532139	8591508	59370	+	113219270	XR_003306159.1
NC_037638.1	1151743	1152155	1151910;1151972;1151943	105	76	126	53	170	73	94	83	76	64	84	69	6.73948	4.20035	5.91566	3.0672	8.81334	4.06778	5.19555	3.79764	3.91776	3.3215	4.3044	3.955	1.6045	1.92868	2.16662	1.3681	1.17952	1.08834	0.648578	0.0334632	1	+	+	+	-	-	-	Promoter (<=1kb)	1148162	1152859	4698	-	113219278	XR_003306169.1
NC_037652.1	9456659	9456998	9456827;9456813;9456826	64	43	134	49	71	25	32	43	36	41	30	36	4.1327	2.4002	6.2883	2.84	3.71088	1.42922	1.80477	1.98924	1.88256	2.1462	1.56984	2.0905	1.72181	2.21419	2.59644	0.907266	0.87716	0.75094	1.36543	0.0305797	1	+	+	+	-	-	-	Exon (XM_026445513.1/724965, exon 6 of 7)	9448823	9449016	194	+	113219289	XR_003306196.1
NC_037653.1	2911678	2912650	2911979;2911979;2911966	193	82	302	92	221	100	107	117	114	105	126	105	12.3345	4.52765	14.1137	5.2824	11.4419	5.55197	5.90652	5.33478	5.8512	5.4166	6.43128	5.989	2.72426	2.67183	2.06087	1.10717	1.08023	1.07385	1.19316	0.0221941	1	+	+	+	-	-	-	Promoter (<=1kb)	2911583	2913703	2121	+	113219296	XR_003306219.1
NC_037653.1	438638	438966	438777;438794;438822	75	29	92	35	86	36	72	61	49	47	44	55	4.83208	1.6365	4.33194	2.0448	4.48398	2.03389	3.99237	2.80302	2.544	2.4528	2.2788	3.164	2.95269	2.11852	2.20463	1.42431	1.03718	0.720228	1.19331	0.0171094	1	+	+	+	-	-	-	Distal Intergenic	459858	461191	1334	+	113219325	113219325
NC_037638.1	1572483	1573029	1572788;1572796;1572798	190	78	197	60	207	87	107	98	88	85	75	55	12.1438	4.30945	9.22284	3.4648	10.7203	4.83736	5.90652	4.47579	4.52832	4.3946	3.84864	3.164	2.81795	2.66187	2.21615	1.31966	1.03043	1.21638	1.1096	0.00739136	1	+	+	+	-	-	-	Intron (XM_006558554.3/100576700, intron 1 of 5)	1591262	1593237	1976	-	113219393	XR_003306491.1
NC_037638.1	4927815	4928148	4927923;4927974;4927952	82	60	99	57	113	59	74	67	70	75	64	68	5.27714	3.32755	4.658	3.2944	5.87556	3.2982	4.10175	3.07428	3.61248	3.8836	3.2916	3.8985	1.58589	1.41391	1.78144	1.33421	0.930188	0.844325	0.621064	0.0450638	1	+	+	+	-	-	-	Promoter (1-2kb)	4929985	4932297	2313	+	113219397	XR_003306501.1
NC_037638.1	27366396	27366745	27366590;27366552;27366603	97	53	117	44	114	54	94	68	66	66	46	68	6.23084	2.9457	5.49644	2.556	5.9271	3.02335	5.19555	3.11949	3.40896	3.4237	2.38008	3.8985	2.11523	2.15041	1.96044	1.66551	0.995695	0.610512	0.928275	0.0807663	1	+	+	+	-	-	-	Intron (XM_026446307.1/113219412, intron 1 of 4)	27334320	27351870	17551	-	113219412	XM_026446308.1
NC_037638.1	27426859	27427790	27427031;27427388;27427322;27427655	261	165	203	103	301	143	195	194	110	157	109	136	16.658	9.0553	9.50232	5.9072	15.5651	7.91568	10.7192	8.81595	5.64768	8.0738	5.5704	7.7405	1.83959	1.6086	1.96636	1.21589	0.699507	0.719643	1.03902	0.0146161	1	+	+	+	-	-	-	Distal Intergenic	27334320	27419667	85348	-	113219412	XM_026446309.1
[truncated: 5 more columns]

## Sheet: unique peaks for 4W
Chromosome	PeakStart	PeakEnd	oriSummitPos	Count_4Q_1_AC	Count_4Q_1_In	Count_4Q_2_AC	Count_4Q_2_In	Count_4Q_3_AC	Count_4Q_3_In	Count_4W_1_AC	Count_4W_1_In	Count_4W_2_AC	Count_4W_2_In	Count_4W_3_AC	Count_4W_3_In	RPM_4Q_1_AC	RPM_4Q_1_In	RPM_4Q_2_AC	RPM_4Q_2_In	RPM_4Q_3_AC	RPM_4Q_3_In	RPM_4W_1_AC	RPM_4W_1_In	RPM_4W_2_AC	RPM_4W_2_In	RPM_4W_3_AC	RPM_4W_3_In	FoldEnrich_4Q_1_AC	FoldEnrich_4Q_2_AC	FoldEnrich_4Q_3_AC	FoldEnrich_4W_1_AC	FoldEnrich_4W_2_AC	FoldEnrich_4W_3_AC	log2foldchange	pvalue	qvalue	In_4Q_1_AC	In_4Q_2_AC	In_4Q_3_AC	In_4W_1_AC	In_4W_2_AC	In_4W_3_AC	annotation	geneStart	geneEnd	geneLength	geneStrand	geneId	transcriptId
NC_037652.1	5378727	5379769	5379274;5379180;5379576	79	163	147	140	85	146	164	166	283	145	272	116	5.0864	8.9462	6.89384	8.0088	4.43244	8.08059	9.02385	7.55007	14.4499	7.4606	13.8247	6.6105	0.568554	0.860783	0.548529	1.1952	1.93683	2.09132	-1.40103	0.0463814	1	-	-	-	+	+	+	Intron (NM_001011562.1/406065, intron 3 of 3)	5362668	5382720	20053	+	406065	XM_006562598.3
NC_037643.1	12973054	12975527	12973637;12974389;12975349;12974446;12974857;12974395	47	194	111	224	72	179	183	234	480	177	669	162	3.05184	10.6372	5.21696	12.78	3.76242	9.8946	10.063	10.6243	24.4733	9.0958	33.9288	9.2095	0.286903	0.408213	0.38025	0.947168	2.69062	3.68411	-2.76739	0.121008	1	-	-	-	+	+	+	Downstream (1-2kb)	12976739	12979704	2966	-	406076	NM_001011570.1
NC_037645.1	9682739	9683233	9682970;9682932;9683080	50	76	141	84	35	73	141	60	166	76	151	69	3.24258	4.20035	6.61436	4.828	1.85544	4.06778	7.76598	2.75781	8.49696	3.9347	7.69728	3.955	0.771979	1.37	0.456131	2.816	2.15949	1.94621	-1.41367	0.0183602	1	-	-	-	+	+	+	Promoter (2-3kb)	9680192	9747799	67608	+	406084	NM_001098215.2
NC_037645.1	7408803	7409452	7409004;7408984;7409237	63	140	65	81	67	92	212	149	174	98	195	103	4.06912	7.69155	3.07428	4.6576	3.50472	5.11221	11.649	6.7815	8.904	5.0589	9.92544	5.876	0.529038	0.660057	0.685559	1.71776	1.76007	1.68915	-1.4627	0.000463984	1	-	-	-	+	+	+	Distal Intergenic	7426943	7561836	134894	+	406104	NM_001040230.1
NC_037646.1	10865823	10866238	10865999;10865980;10866073	46	62	91	76	75	51	125	70	122	55	128	55	2.98826	3.43665	4.28536	4.3736	3.91704	2.85844	6.89094	3.20991	6.25824	2.8616	6.53256	3.164	0.869527	0.979824	1.37034	2.14677	2.18697	2.06465	-0.990787	0.0158519	1	-	-	-	+	+	+	Promoter (1-2kb)	10864307	10891001	26695	+	406123	NM_001011602.1
NC_037652.1	2630746	2631869	2631208;2631728;2631174;2631153	14	70	34	81	35	112	119	91	442	83	681	84	0.9537	3.87305	1.6303	4.6576	1.85544	6.21161	6.5628	4.15932	22.5398	4.2924	34.5365	4.8025	0.24624	0.35003	0.298705	1.57785	5.25109	7.19136	-3.96953	0.117133	1	-	-	-	+	+	+	Promoter (<=1kb)	2619924	2629981	10058	-	406147	XM_026445264.1
NC_037652.1	2621702	2623248	2622220;2622954;2622258;2623009;2622148	33	127	73	124	68	140	173	154	1197	116	1463	124	2.16172	6.9824	3.44692	7.1	3.55626	7.75077	9.51606	7.00755	60.9542	5.9787	74.137	7.0625	0.309596	0.485482	0.458827	1.35797	10.1952	10.4973	-4.13631	0.146814	1	-	-	-	+	+	+	Promoter (<=1kb)	2619834	2621272	1439	-	406147	NM_001011620.1
NC_037652.1	2629815	2630398	2629997;2630013;2630209	12	40	38	59	8	61	178	72	144	55	169	48	0.82654	2.23655	1.81662	3.408	0.46386	3.40814	9.78951	3.30033	7.3776	2.8616	8.6088	2.7685	0.36956	0.533046	0.136104	2.96622	2.57814	3.10955	-3.05856	0.000351015	1	-	-	-	+	+	+	Promoter (<=1kb)	2619924	2629981	10058	-	406147	XM_026445264.1
NC_037652.1	2628598	2629157	2628864;2628866;2628934	45	53	100	65	68	58	414	66	186	63	198	68	2.92468	2.9457	4.70458	3.7488	3.55626	3.24323	22.6964	3.02907	9.51456	3.2704	10.0774	3.8985	0.992864	1.25496	1.09652	7.49286	2.9093	2.58494	-1.95729	0.179426	1	-	-	-	+	+	+	Promoter (<=1kb)	2619924	2629981	10058	-	406147	XM_026445264.1
NC_037652.1	2626168	2628200	2626308;2626734;2627456;2628022;2627392;2627408;2628007	52	137	139	145	51	188	544	196	375	151	649	124	3.36974	7.5279	6.5212	8.2928	2.68008	10.3893	29.8061	8.90637	19.1309	7.7672	32.916	7.0625	0.447633	0.786369	0.257965	3.3466	2.46304	4.66067	-2.81102	0.0363865	1	-	-	-	+	+	+	Promoter (1-2kb)	2619924	2629981	10058	-	406147	XM_026445264.1
NC_037647.1	10212373	10213814	10212495;10212685;10213448;10212688;10213447	58	137	172	135	146	139	166	144	565	133	598	123	3.75122	7.5279	8.05834	7.7248	7.57638	7.6958	9.13323	6.55545	28.7981	6.8474	30.3334	7.006	0.498309	1.04318	0.984482	1.39323	4.2057	4.32963	-1.97475	0.119351	1	-	-	-	+	+	+	Promoter (<=1kb)	10211681	10213727	2047	-	408284	XM_391836.7
NC_037648.1	14401209	14402042	14401492;14401424;14401890;14401433	27	111	45	97	20	77	181	138	307	111	219	85	1.78024	6.1096	2.14268	5.5664	1.08234	4.28766	9.95358	6.28419	15.671	5.7232	11.1408	4.859	0.291384	0.384931	0.252431	1.58391	2.73815	2.29282	-2.83236	0.0286297	1	-	-	-	+	+	+	Promoter (1-2kb)	14399987	14404363	4377	+	408317	XM_391869.7
NC_037648.1	13234080	13234512	13234244;13234290;13234351	14	59	57	54	3	56	105	74	158	68	110	37	0.9537	3.273	2.70164	3.124	0.20616	3.13329	5.79714	3.39075	8.08992	3.5259	5.62104	2.147	0.291384	0.864802	0.0657967	1.70969	2.29443	2.61809	-2.43809	0.00748488	1	-	-	-	+	+	+	Promoter (1-2kb)	13232343	13236031	3689	-	408368	XM_391917.7
NC_037649.1	5277809	5278140	5277962;5277992;5277994	35	48	78	72	93	57	113	52	120	69	125	35	2.28888	2.67295	3.67982	4.1464	4.84476	3.18826	6.23466	2.39613	6.15648	3.577	6.38064	2.034	0.856312	0.887473	1.51956	2.60197	1.72113	3.13699	-1.19284	0.0570761	1	-	-	-	+	+	+	Intron (XM_006562228.3/408374, intron 1 of 11)	5273949	5549277	275329	+	408374	XM_016915347.2
NC_037649.1	8307327	8308469	8307462;8307766;8307492;8308003;8308320;8308015	106	173	199	140	115	137	433	150	280	162	268	154	6.80306	9.4917	9.316	8.0088	5.97864	7.58586	23.7355	6.82671	14.2973	8.3293	13.6222	8.7575	0.716738	1.16322	0.788129	3.47686	1.71651	1.55549	-1.33884	0.151989	1	-	-	-	+	+	+	Promoter (1-2kb)	8305441	8316952	11512	+	408381	XM_391929.6
NC_037650.1	2857799	2859241	2858302;2858876;2858276;2858919;2858226	47	139	124	128	68	139	168	166	894	118	1041	114	3.05184	7.637	5.8225	7.3272	3.55626	7.6958	9.24261	7.55007	45.5376	6.0809	52.7669	6.4975	0.399612	0.794642	0.462104	1.22418	7.48863	8.12111	-3.34528	0.147892	1	-	-	-	+	+	+	Promoter (<=1kb)	2857957	2862610	4654	+	408401	XM_391949.7
NC_037650.1	6231911	6232823	6232164;6232141;6232548;6232593	25	96	147	74	41	85	137	120	351	91	379	75	1.65308	5.29135	6.89384	4.26	2.16468	4.72742	7.54722	5.47041	17.9098	4.7012	19.2432	4.294	0.312412	1.61827	0.457899	1.37964	3.80962	4.48142	-2.01746	0.107616	1	-	-	-	+	+	+	Intron (XM_006560354.3/726547, intron 1 of 7)	6241811	6325630	83820	+	408430	XM_026444580.1
NC_037650.1	6293489	6293913	6293674;6293654;6293721	49	58	108	51	52	46	106	69	159	63	146	60	3.179	3.21845	5.07722	2.9536	2.73162	2.58359	5.85183	3.1647	8.1408	3.2704	7.44408	3.4465	0.987743	1.71899	1.0573	1.84909	2.48924	2.1599	-0.787767	0.0400908	1	-	-	-	+	+	+	Intron (XM_026444580.1/408430, intron 3 of 13)	6297296	6325630	28335	+	408430	XM_026444590.1
NC_037650.1	10091449	10091877	10091656;10091650;10091682	21	55	100	56	44	51	118	91	139	68	154	69	1.39876	3.0548	4.70458	3.2376	2.3193	2.85844	6.50811	4.15932	7.1232	3.5259	7.8492	3.955	0.457889	1.45311	0.811387	1.56471	2.02025	1.98463	-1.0327	0.0632308	1	-	-	-	+	+	+	Exon (XM_006565043.3/408438, exon 5 of 8)	10087421	10098724	11304	-	408438	XM_006565043.3
NC_037651.1	4441926	4442494	4442075;4442178;4442357	19	74	76	65	32	77	106	89	176	70	176	83	1.2716	4.09125	3.58666	3.7488	1.70082	4.28766	5.85183	4.0689	9.00576	3.6281	8.96328	4.746	0.31081	0.956749	0.396678	1.43818	2.48222	1.8886	-1.80343	0.0244863	1	-	-	-	+	+	+	Intron (XM_391991.5/408443, intron 1 of 3)	4398112	4448290	50179	-	408443	XM_391991.5
NC_037651.1	5792186	5792687	5792371;5792360;5792385	39	68	66	48	55	52	184	68	143	73	131	48	2.5432	3.76395	3.12086	2.7832	2.88624	2.91341	10.1177	3.11949	7.32672	3.7814	6.68448	2.7685	0.675673	1.12132	0.990674	3.24338	1.93757	2.41448	-1.44607	0.0404319	1	-	-	-	+	+	+	Downstream (<1kb)	5789174	5791327	2154	+	408452	XM_392000.7
NC_037651.1	10047612	10052554	10048159;10048831;10048183;10048821;10049200;10049500;10050510;10051321;10052093;10050393;10051399;10052105;10052142	76	350	154	418	93	414	378	553	1989	440	2332	405	4.89566	19.1471	7.2199	23.7992	4.84476	22.8125	20.7275	25.0463	101.251	22.5351	118.143	22.939	0.255687	0.303367	0.212373	0.827567	4.49304	5.15031	-3.76271	0.138013	1	-	-	-	+	+	+	3' UTR	10050863	10056811	5949	-	408497	XM_392041.6
NC_037653.1	3181352	3184540	3181571;3182074;3182685;3183323;3183874;3184293;3181595;3182049;3182697;3183330;3183872;3184291;3184314	57	261	164	249	136	306	349	312	1516	278	2183	209	3.68764	14.2921	7.6857	14.2	7.06098	16.8758	19.1415	14.1507	77.185	14.2569	110.598	11.865	0.258019	0.541246	0.418409	1.35269	5.41387	9.32137	-3.72378	0.163831	1	-	-	-	+	+	+	Promoter (<=1kb)	3182566	3184809	2244	-	408558	XM_392103.6
NC_037653.1	6659322	6660513	6659587;6660283;6659518;6660247;6660262	72	132	209	111	72	114	331	201	415	145	451	137	4.64134	7.25515	9.7818	6.3616	3.76242	6.32155	18.1571	9.13242	21.1661	7.4606	22.8893	7.797	0.63973	1.53763	0.595174	1.9882	2.83705	2.93565	-1.48502	0.0180204	1	-	-	-	+	+	+	Promoter (2-3kb)	6656426	6682385	25960	+	408563	XM_392107.7
NC_037638.1	21421992	21422527	21422244;21422220;21422275	39	99	129	73	19	97	122	84	200	86	157	70	2.5432	5.455	6.0554	4.2032	1.0308	5.38706	6.72687	3.84285	10.2269	4.4457	8.00112	4.0115	0.466214	1.44066	0.191347	1.75049	2.3004	1.99455	-1.52668	0.0575288	1	-	-	-	+	+	+	Intron (XM_026446499.1/413968, intron 45 of 56)	21473394	21485838	12445	+	408572	XM_392114.6
NC_037638.1	14427652	14428834	14427893;14428463;14428476;14428453	38	131	84	124	44	121	117	152	568	147	625	103	2.47962	7.2006	3.9593	7.1	2.3193	6.70634	6.45342	6.91713	28.9507	7.5628	31.7006	5.876	0.344363	0.557648	0.345837	0.932962	3.82804	5.39493	-3.02481	0.150641	1	-	-	-	+	+	+	Promoter (<=1kb)	14427151	14428705	1555	-	408589	XM_623178.6
NC_037638.1	8113207	8114079	8113402;8113728;8113956;8113746;8113791	60	125	166	136	65	106	145	138	264	92	227	111	3.87838	6.8733	7.77886	7.7816	3.40164	5.88179	7.98474	6.28419	13.4832	4.7523	11.5459	6.328	0.564268	0.999648	0.578334	1.27061	2.83719	1.82457	-1.46948	0.0994971	1	-	-	-	+	+	+	Intron (XM_001122450.5/726729, intron 2 of 5)	8167088	8170587	3500	+	408604	XM_016914689.2
NC_037638.1	4885786	4886441	4885955;4885992;4886160	39	84	113	103	23	93	115	101	219	92	179	73	2.5432	4.63675	5.31012	5.9072	1.23696	5.16718	6.34404	4.61142	11.1936	4.7523	9.1152	4.181	0.548488	0.898923	0.239388	1.37572	2.35541	2.18015	-1.80918	0.0232868	1	-	-	-	+	+	+	Intron (XM_016913819.2/408616, intron 1 of 8)	4829148	4900786	71639	-	408616	XM_016913819.2
NC_037638.1	2521251	2521823	2521664;2521616;2521564	29	93	115	95	23	77	129	115	194	89	183	75	1.9074	5.1277	5.40328	5.4528	1.23696	4.28766	7.1097	5.24436	9.9216	4.599	9.31776	4.294	0.37198	0.990918	0.288493	1.35568	2.15734	2.16995	-1.78296	0.019538	1	-	-	-	+	+	+	Promoter (<=1kb)	2521875	2539536	17662	+	408623	XM_026444334.1
NC_037638.1	2525217	2525703	2525370;2525404;2525560;2525582	9	42	48	65	9	50	94	73	97	63	124	60	0.6358	2.34565	2.28242	3.7488	0.5154	2.80347	5.19555	3.34554	4.98624	3.2704	6.33	3.4465	0.271055	0.60884	0.183844	1.55298	1.52466	1.83665	-2.20784	0.00184418	1	-	-	-	+	+	+	Intron (XM_026444332.1/408623, intron 2 of 13)	2521875	2539536	17662	+	408623	XM_026444334.1
NC_037638.1	24542097	24542940	24542411;24542457;24542497	16	91	56	97	12	86	99	90	200	90	285	93	1.08086	5.0186	2.65506	5.5664	0.67002	4.78239	5.469	4.11411	10.2269	4.6501	14.483	5.311	0.215371	0.47698	0.140101	1.32933	2.19929	2.72698	-2.90971	0.0403661	1	-	-	-	+	+	+	Promoter (1-2kb)	24538508	24540961	2454	-	408641	XM_392181.7
NC_037639.1	16050602	16051625	16050951;16051010;16050969	25	135	136	99	44	98	144	145	372	115	448	95	1.65308	7.4188	6.38146	5.68	2.3193	5.44203	7.93005	6.60066	18.9782	5.9276	22.7374	5.424	0.222823	1.1235	0.426183	1.2014	3.20167	4.192	-2.27772	0.112131	1	-	-	-	+	+	+	Promoter (<=1kb)	16046083	16051632	5550	-	408656	XM_006568704.3
NC_037640.1	13363459	13363892	13363677;13363634;13363676	79	54	69	36	54	60	237	76	111	57	147	52	5.0864	3.00025	3.2606	2.1016	2.8347	3.35317	13.0162	3.48117	5.69856	2.9638	7.49472	2.9945	1.69533	1.55148	0.845379	3.73903	1.92272	2.50283	-0.996506	0.110125	1	-	-	-	+	+	+	Promoter (2-3kb)	13359404	13366345	6942	-	408723	XM_006569859.3
NC_037640.1	13225804	13226145	13225990;13225978;13226081	8	39	51	49	22	49	125	56	145	54	128	56	0.57222	2.182	2.42216	2.84	1.18542	2.7485	6.89094	2.57697	7.42848	2.8105	6.53256	3.2205	0.262246	0.852873	0.431297	2.67405	2.64312	2.02843	-2.24795	0.00238929	1	-	-	-	+	+	+	Promoter (1-2kb)	13093816	13224150	130335	-	408725	XM_026439652.1
NC_037640.1	8525845	8527491	8525964;8526623;8527318;8526661;8526661;8527348	34	183	155	180	60	187	301	224	529	174	690	173	2.2253	10.0372	7.26648	10.2808	3.14394	10.3344	16.5164	10.1723	26.9664	8.9425	34.9922	9.831	0.221705	0.706801	0.304221	1.62366	3.01553	3.55937	-2.73352	0.0487002	1	-	-	-	+	+	+	Promoter (<=1kb)	8525320	8634817	109498	+	408741	XM_006563982.3
NC_037640.1	5497557	5498944	5497888;5498792;5497880;5498281;5498752;5497883	26	93	68	101	89	123	110	157	579	109	1009	114	1.71666	5.1277	3.21402	5.7936	4.6386	6.81628	6.07059	7.14318	29.5104	5.621	51.1464	6.4975	0.334782	0.554754	0.680518	0.849844	5.25003	7.8717	-3.15361	0.180801	1	-	-	-	+	+	+	Promoter (<=1kb)	5497796	5499845	2050	-	408748	XM_006560922.3
NC_037640.1	3972376	3973016	3972582;3972664;3972854	10	72	112	59	17	91	84	91	215	100	237	73	0.69938	3.98215	5.26354	3.408	0.92772	5.05724	4.64865	4.15932	10.9901	5.1611	12.0523	4.181	0.175629	1.54447	0.183444	1.11765	2.12941	2.88264	-1.68713	0.109619	1	-	-	-	+	+	+	Promoter (<=1kb)	3969458	3973072	3615	-	408754	XM_016911336.2
NC_037640.1	3070447	3070953	3070654;3070675;3070751	62	84	121	68	94	81	148	50	151	75	140	81	4.00554	4.63675	5.68276	3.9192	4.8963	4.50754	8.14881	2.30571	7.73376	3.8836	7.14024	4.633	0.863868	1.44998	1.08625	3.53419	1.99139	1.54117	-1.05547	0.172867	1	-	-	-	+	+	+	Intron (XM_016911332.2/408759, intron 2 of 9)	3073963	3115462	41500	+	408759	XM_026439842.1
NC_037641.1	6941076	6942705	6941311;6942067;6942567;6941239;6942091;6942078	26	148	178	139	66	167	186	207	460	190	571	147	1.71666	8.12795	8.33782	7.952	3.45318	9.23496	10.227	9.40368	23.4557	9.7601	28.9661	8.362	0.211205	1.04852	0.373925	1.08755	2.40322	3.46402	-2.08991	0.109644	1	-	-	-	+	+	+	Intron (XM_016911575.2/408810, intron 5 of 21)	6952645	6977717	25073	+	408810	XM_016911577.2
NC_037641.1	4791084	4791979	4791554;4791318;4791576;4791637	38	123	144	105	44	80	156	101	288	109	331	82	2.47962	6.7642	6.7541	6.0208	2.3193	4.45257	8.58633	4.61142	14.7043	5.621	16.8125	4.6895	0.36658	1.12179	0.52089	1.86197	2.61596	3.58514	-2.00466	0.0387921	1	-	-	-	+	+	+	Promoter (<=1kb)	4782182	4791706	9525	-	408818	XM_016911661.2
NC_037641.1	4784910	4789419	4785095;4785539;4785836;4786167;4786650;4787331;4787725;4788600;4789194;4785084;4785578;4785842;4786191;4786648;4787814;4787865;4788208;4788496;4789216	86	329	293	409	107	399	236	494	1062	397	1632	293	5.53146	18.0015	13.6945	23.288	5.56632	21.988	12.9615	22.3789	54.0854	20.3378	82.6951	16.611	0.307278	0.58805	0.253153	0.579184	2.65935	4.97833	-2.83886	0.204146	1	-	-	-	+	+	+	Promoter (2-3kb)	4782182	4791706	9525	-	408818	XM_016911661.2
NC_037641.1	3752039	3752630	3752187;3752336;3752242	90	83	99	76	85	65	185	91	154	70	185	71	5.78578	4.5822	4.658	4.3736	4.43244	3.62802	10.1723	4.15932	7.8864	3.6281	9.41904	4.068	1.26266	1.06503	1.22172	2.44566	2.1737	2.3154	-0.966265	0.000479756	1	-	-	-	+	+	+	Distal Intergenic	3733041	3734319	1279	-	408819	XM_006558676.3
NC_037642.1	9827437	9827993	9827594;9827778;9827836	69	78	120	91	67	74	133	67	221	89	146	59	4.4506	4.30945	5.63618	5.2256	3.50472	4.12275	7.32846	3.07428	11.2954	4.599	7.44408	3.39	1.03275	1.07857	0.850093	2.3838	2.45606	2.19589	-1.24842	0.000214507	1	-	-	-	+	+	+	Promoter (<=1kb)	9807768	9827080	19313	-	408839	XM_006567830.3
NC_037642.1	9836945	9837457	9837206;9837269;9837304	25	54	106	42	37	46	131	53	122	63	175	60	1.65308	3.00025	4.98406	2.4424	1.95852	2.58359	7.21908	2.44134	6.25824	3.2704	8.91264	3.4465	0.550981	2.04064	0.758061	2.95702	1.9136	2.586	-1.1545	0.0799597	1	-	-	-	+	+	+	Promoter (<=1kb)	9807768	9838391	30624	-	408839	XM_392370.6
NC_037642.1	12224847	12228055	12225086;12226007;12227161;12227618;12225034;12225871;12226328;12227172;12227604;12227614	46	302	166	259	112	299	200	364	955	308	1205	254	2.98826	16.5286	7.77886	14.768	5.82402	16.491	10.9927	16.5017	48.6413	15.7899	61.0718	14.4075	0.180793	0.526738	0.353164	0.666156	3.08053	4.23889	-2.91239	0.158408	1	-	-	-	+	+	+	Promoter (<=1kb)	12225065	12230575	5511	+	408859	XM_392390.5
NC_037643.1	17096185	17097594	17096358;17096356;17097002;17097426;17096348;17096990	128	138	163	118	122	130	325	150	203	135	326	112	8.20182	7.58245	7.63912	6.7592	6.33942	7.20107	17.8289	6.82671	10.3795	6.9496	16.5593	6.3845	1.08168	1.13018	0.880344	2.61164	1.49354	2.59367	-1.11528	0.0773576	1	-	-	-	+	+	+	3' UTR	17086408	17098244	11837	+	408869	XM_026441488.1
NC_037643.1	11983268	11983758	11983597;11983489;11983411	51	89	113	77	46	41	149	72	179	61	120	45	3.30616	4.9095	5.31012	4.4304	2.42238	2.30874	8.2035	3.30033	9.1584	3.1682	6.12744	2.599	0.673421	1.19856	1.04922	2.48566	2.89073	2.35761	-1.40465	0.00202135	1	-	-	-	+	+	+	Promoter (2-3kb)	11986147	12101047	114901	+	408877	XM_016912570.2
NC_037641.1	10543786	10545648	10544164;10544727;10545428;10544109;10544734;10544907	61	163	219	165	88	170	200	169	1229	174	1403	115	3.94196	8.9462	10.2476	9.4288	4.58706	9.39987	10.9927	7.6857	62.5824	8.9425	71.0986	6.554	0.44063	1.08684	0.487992	1.43028	6.99831	10.8481	-3.25768	0.169256	1	-	-	-	+	+	+	Promoter (<=1kb)	10543285	10545021	1737	-	408918	XM_392446.7
NC_037644.1	2324111	2325057	2324538;2324550;2324704	38	100	162	98	27	79	123	100	584	106	593	73	2.47962	5.50955	7.59254	5.6232	1.44312	4.3976	6.78156	4.56621	29.7648	5.4677	30.0802	4.181	0.450059	1.35022	0.328161	1.48516	5.44375	7.1945	-2.73022	0.136977	1	-	-	-	+	+	+	Intron (XM_026441734.1/408952, intron 6 of 11)	2329917	2337531	7615	+	408951	XM_006559821.3
NC_037644.1	2333879	2334357	2334096;2334106;2334079	90	74	91	44	86	41	207	58	127	56	148	51	5.78578	4.09125	4.28536	2.556	4.48398	2.30874	11.3755	2.66739	6.51264	2.9127	7.54536	2.938	1.41418	1.67659	1.94218	4.26466	2.23595	2.5682	-0.849507	0.159366	1	-	-	-	+	+	+	Exon (XM_006559821.3/408951, exon 3 of 4)	2329917	2337531	7615	+	408951	XM_006559821.3
NC_037645.1	1204679	1205461	1205189;1205113;1205258	14	99	79	75	29	77	199	103	287	92	191	109	0.9537	5.455	3.7264	4.3168	1.5462	4.28766	10.938	4.70184	14.6534	4.7523	9.72288	6.215	0.17483	0.863232	0.360616	2.32632	3.08343	1.56442	-2.31796	0.0343825	1	-	-	-	+	+	+	Promoter (<=1kb)	1205292	1205983	692	-	408956	NM_001040231.1
NC_037646.1	11048869	11050204	11049125;11049716;11050106;11049158;11049182;11049911	22	134	130	134	47	97	170	109	455	121	514	95	1.46234	7.36425	6.10198	7.668	2.47392	5.38706	9.35199	4.9731	23.2013	6.2342	26.0796	5.424	0.198573	0.795772	0.459234	1.88052	3.72162	4.80819	-2.84033	0.0677224	1	-	-	-	+	+	+	Promoter (1-2kb)	11047528	11053471	5944	+	408989	XM_392521.7
NC_037646.1	4158184	4160428	4158519;4159156;4159547;4160169;4158496;4158501;4159626;4160182	34	208	107	166	50	176	281	249	544	225	833	208	2.2253	11.4009	5.03064	9.4856	2.62854	9.72969	15.4226	11.3025	27.7296	11.5486	42.2338	11.8085	0.195186	0.530345	0.270157	1.36453	2.40112	3.57656	-2.88245	0.0769202	1	-	-	-	+	+	+	Promoter (<=1kb)	4154141	4161404	7264	-	409025	XM_392555.7
NC_037650.1	7339645	7340598	7339838;7340053;7340448;7340063	74	122	102	81	57	113	160	111	250	96	300	106	4.7685	6.70965	4.79774	4.6576	2.98932	6.26658	8.80509	5.06352	12.7709	4.9567	15.2426	6.0455	0.710693	1.03009	0.477026	1.73893	2.57649	2.52131	-1.62417	0.0134736	1	-	-	-	+	+	+	Exon (XM_006562746.3/409049, exon 15 of 16)	7330971	7346686	15716	+	409049	XM_006562745.3
NC_037638.1	9177493	9177849	9177656;9177623;9177711	50	54	63	34	63	45	130	64	94	60	87	33	3.24258	3.00025	2.98112	1.988	3.29856	2.52862	7.16439	2.93865	4.8336	3.1171	4.45632	1.921	1.08077	1.49956	1.30449	2.43799	1.55067	2.31979	-0.699439	0.0841371	1	-	-	-	+	+	+	Exon (XR_001706185.2/551581, exon 9 of 11)	9146469	9170519	24051	-	409078	XM_026438914.1
NC_037644.1	12072230	12073698	12072379;12073211;12073512;12072634;12073214	82	46	144	88	77	73	132	83	226	81	465	59	5.27714	2.56385	6.7541	5.0552	4.02012	4.06778	7.27377	3.79764	11.5498	4.1902	23.5982	3.39	2.05829	1.33607	0.988284	1.91534	2.75638	6.96112	-1.40833	0.25926	1	-	-	-	+	+	+	Promoter (<=1kb)	12068752	12072931	4180	-	409106	XM_016913235.2
NC_037640.1	4406815	4407364	4407111;4407109;4407115	13	56	45	38	16	70	79	56	293	48	315	44	0.89012	3.10935	2.14268	2.2152	0.87618	3.90287	4.3752	2.57697	14.9587	2.5039	16.0022	2.5425	0.286272	0.967263	0.224496	1.69781	5.97416	6.29388	-3.24016	0.103239	1	-	-	-	+	+	+	Promoter (<=1kb)	4406906	4408685	1780	+	409132	XM_392658.7
NC_037648.1	14312481	14314202	14313261;14313901;14313250;14313260	77	91	130	153	119	175	188	223	1001	155	1256	134	4.95924	5.0186	6.10198	8.7472	6.1848	9.67472	10.3364	10.127	50.9818	7.9716	63.6545	7.6275	0.988172	0.697592	0.639274	1.02068	6.39543	8.34539	-2.76108	0.177224	1	-	-	-	+	+	+	Promoter (<=1kb)	14309646	14313490	3845	-	409152	XM_392676.6
NC_037652.1	3785223	3785877	3785456;3785434;3785719	18	34	113	52	36	51	106	69	377	34	408	42	1.20802	1.90925	5.31012	3.0104	1.90698	2.85844	5.85183	3.1647	19.2326	1.7885	20.7118	2.4295	0.63272	1.76393	0.66714	1.84909	10.7535	8.52513	-2.78575	0.150847	1	-	-	-	+	+	+	Promoter (<=1kb)	3781273	3785773	4501	-	409180	XM_026445292.1
NC_037639.1	15059917	15060374	15060167;15060168;15060229	21	46	87	55	29	66	94	83	155	67	181	59	1.39876	2.56385	4.09904	3.1808	1.5462	3.68299	5.19555	3.79764	7.93728	3.4748	9.21648	3.39	0.54557	1.28868	0.419822	1.3681	2.28424	2.71873	-1.499	0.0538275	1	-	-	-	+	+	+	Intron (XM_006568824.3/409192, intron 5 of 18)	15050186	15067929	17744	-	409192	XM_006568825.3
NC_037645.1	2157084	2157604	2157388;2157355;2157320	12	56	88	47	12	41	106	59	200	38	179	53	0.82654	3.10935	4.14562	2.7264	0.67002	2.30874	5.85183	2.7126	10.2269	1.9929	9.1152	3.051	0.265824	1.52055	0.29021	2.15728	5.13167	2.98761	-2.30707	0.0727455	1	-	-	-	+	+	+	Exon (XM_006559431.3/409196, exon 2 of 5)	2153796	2160013	6218	+	409196	XM_006559431.3
NC_037644.1	8388478	8389022	8388661;8388734;8388829	87	68	99	64	79	71	158	90	133	66	115	73	5.59504	3.76395	4.658	3.692	4.1232	3.95784	8.69571	4.11411	6.81792	3.4237	5.87424	4.181	1.48648	1.26165	1.04178	2.11363	1.99139	1.40498	-0.539891	0.102467	1	-	-	-	+	+	+	Intron (XM_006562570.3/409212, intron 1 of 28)	8139228	8394435	255208	-	409212	XM_006562570.3
NC_037653.1	837854	838952	838522;838279;838471	35	115	148	96	53	122	192	150	329	120	348	126	2.28888	6.3278	6.94042	5.5096	2.78316	6.76131	10.5552	6.82671	16.7904	6.1831	17.6734	7.1755	0.361718	1.2597	0.41163	1.54616	2.71553	2.46302	-1.72583	0.0288229	1	-	-	-	+	+	+	Intron (XM_026445919.1/409228, intron 1 of 5)	819028	864636	45609	+	409228	XM_026445918.1
NC_037650.1	7374040	7374669	7374161;7374432;7374504	10	112	38	82	16	82	113	106	148	71	156	56	0.69938	6.16415	1.81662	4.7144	0.87618	4.56251	6.23466	4.83747	7.58112	3.6792	7.95048	3.2205	0.113459	0.385334	0.192039	1.28883	2.06053	2.46871	-3.07413	0.0329897	1	-	-	-	+	+	+	Downstream (<1kb)	7375352	7381521	6170	-	409230	XM_006562738.3
NC_037638.1	15169613	15170707	15170038;15169935;15169874;15170315	31	93	180	103	48	107	262	121	783	115	789	102	2.03456	5.1277	8.43098	5.9072	2.52546	5.93676	14.3835	5.51562	39.8899	5.9276	40.0056	5.8195	0.396778	1.42724	0.425394	2.60778	6.72952	6.87441	-2.84942	0.072294	1	-	-	-	+	+	+	Promoter (2-3kb)	15161329	15173530	12202	-	409261	XM_026445108.1
NC_037641.1	425893	426504	426111;426189;426232	66	100	116	88	86	66	263	89	193	94	194	81	4.25986	5.50955	5.44986	5.0552	4.48398	3.68299	14.4382	4.0689	9.87072	4.8545	9.8748	4.633	0.773177	1.07807	1.21748	3.54843	2.03331	2.13141	-1.32968	0.0783252	1	-	-	-	+	+	+	Exon (XM_392824.6/409306, exon 5 of 8)	416774	430011	13238	-	409306	XM_392824.6
NC_037648.1	15811560	15813523	15812162;15812127;15812963;15812041;15812239;15813018;15813301	64	198	130	197	104	206	156	232	1153	172	1328	185	4.1327	10.8554	6.10198	11.2464	5.4117	11.3788	8.58633	10.5339	58.7155	8.8403	67.3006	10.509	0.380705	0.542572	0.475595	0.815114	6.6418	6.40409	-3.3087	0.160769	1	-	-	-	+	+	+	Promoter (<=1kb)	15808856	15812433	3578	-	409373	XM_006570349.3
NC_037648.1	12209314	12210739	12209540;12209991;12210484;12209623;12209958;12209937;12210503	55	110	136	105	45	112	120	116	352	102	404	102	3.56048	6.05505	6.38146	6.0208	2.37084	6.21161	6.61749	5.28957	17.9606	5.2633	20.5092	5.8195	0.588018	1.0599	0.381679	1.25104	3.41242	3.52422	-2.01226	0.100209	1	-	-	-	+	+	+	Promoter (<=1kb)	12204144	12209584	5441	-	409396	XM_006566347.3
NC_037648.1	12208430	12208995	12208834;12208805;12208822	10	23	83	29	21	36	130	40	133	28	156	20	0.69938	1.3092	3.91272	1.704	1.13388	2.03389	7.16439	1.85361	6.81792	1.4819	7.95048	1.1865	0.534204	2.2962	0.557493	3.8651	4.6008	6.70078	-2.16244	0.0236398	1	-	-	-	+	+	+	Promoter (<=1kb)	12204144	12209584	5441	-	409396	XM_006566347.3
NC_037638.1	5358051	5358881	5358303;5358707;5358618;5358620	58	127	104	99	70	119	150	119	221	93	217	116	3.75122	6.9824	4.8909	5.68	3.65934	6.5964	8.25819	5.4252	11.2954	4.8034	11.0395	6.6105	0.537239	0.861074	0.554748	1.52219	2.35154	1.66999	-1.50512	0.0288813	1	-	-	-	+	+	+	Promoter (2-3kb)	5356800	5361132	4333	-	409418	NM_001160050.1
NC_037646.1	2573704	2574139	2573859;2573857;2573910	24	56	48	42	33	44	150	69	106	57	104	54	1.5895	3.10935	2.28242	2.4424	1.75236	2.47365	8.25819	3.1647	5.44416	2.9638	5.3172	3.1075	0.5112	0.934499	0.708411	2.60947	1.83689	1.71109	-1.51524	0.0270193	1	-	-	-	+	+	+	Exon (XM_026442948.1/409465, exon 6 of 14)	2562383	2578398	16016	-	409465	XM_026442948.1
NC_037646.1	6418390	6418899	6418643;6418616;6418719	8	52	50	56	9	62	140	74	167	81	173	46	0.57222	2.89115	2.37558	3.2376	0.5154	3.46311	7.71129	3.39075	8.54784	4.1902	8.81136	2.6555	0.197921	0.733747	0.148826	2.27421	2.03996	3.31815	-2.82043	0.0170123	1	-	-	-	+	+	+	5' UTR	6414472	6429898	15427	-	409515	XM_006561607.3
NC_037652.1	9298842	9299454	9299161;9299178;9299151	59	32	81	36	65	50	120	47	612	67	697	37	3.8148	1.80015	3.81956	2.1016	3.40164	2.80347	6.61749	2.17008	31.1894	3.4748	35.3467	2.147	2.11916	1.81745	1.21337	3.04942	8.97588	16.4633	-2.46775	0.182337	1	-	-	-	+	+	+	Promoter (<=1kb)	9296545	9299331	2787	-	409550	XM_006563695.3
NC_037642.1	11348539	11349473	11348913;11348909;11348877	33	82	94	90	37	101	142	128	572	117	635	111	2.16172	4.52765	4.4251	5.1688	1.95852	5.60694	7.82067	5.83209	29.1542	6.0298	32.207	6.328	0.477449	0.856117	0.349303	1.34097	4.83502	5.0896	-2.74293	0.116216	1	-	-	-	+	+	+	Promoter (<=1kb)	11348291	11352847	4557	+	409576	XM_006567650.3
NC_037653.1	1216497	1217411	1216822;1217162;1216859;1217177;1216909	28	94	102	97	48	78	172	92	383	78	394	80	1.84382	5.18225	4.79774	5.5664	2.52546	4.34263	9.46137	4.20453	19.5379	4.0369	20.0028	4.5765	0.355795	0.861911	0.581551	2.25028	4.83983	4.37076	-2.67124	0.0518746	1	-	-	-	+	+	+	Promoter (<=1kb)	1185337	1216996	31660	-	409604	XM_026445862.1
NC_037652.1	8203738	8204674	8204101;8204100;8204499;8204064	82	52	132	46	108	69	120	69	966	67	1112	71	5.27714	2.89115	6.19514	2.6696	5.61786	3.8479	6.61749	3.1647	49.201	3.4748	56.3623	4.068	1.82527	2.32062	1.45998	2.09103	14.1594	13.855	-2.42501	0.175681	1	-	-	-	+	+	+	Promoter (<=1kb)	8203953	8206193	2241	+	409613	XM_006563639.3
NC_037645.1	2569234	2569722	2569385;2569507;2569550	15	58	94	65	24	54	109	63	161	50	144	65	1.01728	3.21845	4.4251	3.7488	1.2885	3.02335	6.0159	2.89344	8.24256	2.6061	7.3428	3.729	0.316078	1.1804	0.426183	2.07915	3.16279	1.96911	-1.9071	0.0235448	1	-	-	-	+	+	+	Promoter (1-2kb)	2525106	2571437	46332	-	409616	XM_026442548.1
NC_037653.1	2648351	2648931	2648704;2648736;2648767	53	63	104	78	86	64	108	60	168	84	137	83	3.43332	3.4912	4.8909	4.4872	4.48398	3.57305	5.96121	2.75781	8.59872	4.3435	6.98832	4.746	0.983421	1.08997	1.25494	2.16157	1.97968	1.47247	-0.754156	0.0516659	1	-	-	-	+	+	+	Promoter (<=1kb)	2649891	2691003	41113	+	409638	XM_006559412.2
NC_037640.1	4847701	4848323	4848007;4848022;4848149	22	76	109	72	26	74	182	90	238	60	274	74	1.46234	4.20035	5.1238	4.1464	1.39158	4.12275	10.0083	4.11411	12.1603	3.1171	13.926	4.2375	0.348147	1.23572	0.337537	2.43268	3.90116	3.28637	-2.32391	0.0103749	1	-	-	-	+	+	+	Promoter (<=1kb)	4845193	4848228	3036	-	409639	XM_393137.7
NC_037640.1	8065972	8066545	8066197;8066277;8066202	21	61	102	75	36	76	104	91	174	60	216	81	1.39876	3.3821	4.79774	4.3168	1.90698	4.23269	5.74245	4.15932	8.904	3.1171	10.9889	4.633	0.413577	1.11141	0.450536	1.38062	2.8565	2.37188	-1.7422	0.0508361	1	-	-	-	+	+	+	Promoter (1-2kb)	8053539	8064200	10662	-	409643	XM_006563924.2
NC_037653.1	5008843	5009576	5009136;5009444;5009070;5009410;5009158	87	91	145	98	109	87	271	109	199	86	174	97	5.59504	5.0186	6.80068	5.6232	5.6694	4.83736	14.8757	4.9731	10.176	4.4457	8.862	5.537	1.11486	1.2094	1.172	2.99123	2.28895	1.60051	-0.976741	0.106066	1	-	-	-	+	+	+	Promoter (1-2kb)	5011390	5077526	66137	+	409655	XM_026445807.1
NC_037652.1	5852824	5853979	5853102;5853733;5853266;5853792;5853798	7	66	100	82	40	86	133	106	311	84	347	98	0.50864	3.65485	4.70458	4.7144	2.11314	4.78239	7.32846	4.83747	15.8746	4.3435	17.6227	5.5935	0.139169	0.997917	0.441859	1.51494	3.65479	3.15057	-2.39768	0.0586408	1	-	-	-	+	+	+	Promoter (1-2kb)	5851689	5869613	17925	+	409667	XM_393165.7
NC_037652.1	5859296	5859667	5859472;5859467;5859440	19	42	81	22	8	36	121	56	134	33	100	38	1.2716	2.34565	3.81956	1.3064	0.46386	2.03389	6.67218	2.57697	6.8688	1.7374	5.11464	2.2035	0.54211	2.92373	0.228065	2.58916	3.95349	2.32114	-1.26278	0.172832	1	-	-	-	+	+	+	Exon (XM_016916565.2/409667, exon 2 of 4)	5851689	5869613	17925	+	409667	XM_393165.7
NC_037638.1	15874385	15875196	15874828;15874870;15874888	16	76	75	52	32	82	116	105	290	80	356	49	1.08086	4.20035	3.54008	3.0104	1.70082	4.56251	6.39873	4.79226	14.8061	4.1391	18.0785	2.825	0.257326	1.17595	0.372782	1.33522	3.57713	6.39947	-2.64692	0.15864	1	-	-	-	+	+	+	Promoter (<=1kb)	15872179	15875269	3091	-	409689	XM_393186.7
NC_037638.1	15870850	15872265	15871024;15871024;15871166;15871998;15871958;15871984	29	95	162	104	19	139	273	127	284	121	409	110	1.9074	5.2368	7.59254	5.964	1.0308	7.6958	14.9851	5.78688	14.5008	6.2342	20.7624	6.2715	0.36423	1.27306	0.133943	2.5895	2.32601	3.3106	-2.21545	0.00977158	1	-	-	-	+	+	+	3' UTR	15872179	15875269	3091	-	409689	XM_393186.7
NC_037638.1	9821990	9822689	9822356;9822388;9822347	19	55	85	73	19	88	210	75	177	81	278	77	1.2716	3.0548	4.00588	4.2032	1.0308	4.89233	11.5396	3.43596	9.05664	4.1902	14.1286	4.407	0.416263	0.953055	0.210697	3.35848	2.16139	3.20595	-2.46535	0.00989293	1	-	-	-	+	+	+	Distal Intergenic	9734480	9817264	82785	-	409701	XM_393199.6
NC_037643.1	15027039	15027479	15027174;15027266;15027294	27	56	93	41	24	35	84	51	100	46	122	35	1.78024	3.10935	4.37852	2.3856	1.2885	1.97892	4.64865	2.35092	5.13888	2.4017	6.22872	2.034	0.572544	1.8354	0.651113	1.97737	2.13968	3.0623	-1.23077	0.0627487	1	-	-	-	+	+	+	Promoter (<=1kb)	15027175	15035893	8719	+	409708	XM_006570549.2
NC_037645.1	7153292	7154339	7153521;7153451;7153958;7154191;7153544;7154150	38	116	141	120	51	135	257	122	252	125	252	108	2.47962	6.38235	6.61436	6.8728	2.68008	7.47592	14.11	5.56083	12.8726	6.4386	12.8119	6.1585	0.388512	0.962397	0.358495	2.53739	1.99929	2.08036	-1.95269	0.00345313	1	-	-	-	+	+	+	Intron (XR_003305208.1/100577444, intron 2 of 2)	7007801	7159320	151520	-	409722	XM_026442412.1
NC_037638.1	11324437	11324922	11324694;11324670;11324724	40	58	108	62	46	59	109	63	177	57	135	32	2.60678	3.21845	5.07722	3.5784	2.42238	3.2982	6.0159	2.89344	9.05664	2.9638	6.88704	1.8645	0.809949	1.41885	0.734455	2.07915	3.05575	3.69377	-1.57501	0.0361845	1	-	-	-	+	+	+	Exon (XR_001705682.2/100577336, exon 5 of 7)	11313667	11320407	6741	-	409733	XM_006569592.3
NC_037638.1	11321182	11321557	11321362;11321357;11321382	19	32	87	28	47	30	191	59	124	30	114	31	1.2716	1.80015	4.09904	1.6472	2.47392	1.70407	10.5005	2.7126	6.36	1.5841	5.8236	1.808	0.706386	2.48849	1.45177	3.87101	4.0149	3.22102	-1.2572	0.0357112	1	-	-	-	+	+	+	Promoter (<=1kb)	11313667	11320407	6741	-	409733	XM_006569592.3
NC_037651.1	6486790	6487170	6486954;6486931;6487000	77	68	85	50	75	50	154	67	89	37	111	46	4.95924	3.76395	4.00588	2.8968	3.91704	2.80347	8.47695	3.07428	4.5792	1.9418	5.67168	2.6555	1.31756	1.38286	1.39721	2.75738	2.35822	2.13582	-0.823472	0.0268401	1	-	-	-	+	+	+	Intron (XM_006564965.3/409752, intron 1 of 14)	6477760	6502539	24780	+	409752	XM_016912468.2
NC_037651.1	6489590	6489950	6489814;6489746;6489792	63	39	81	50	83	51	101	57	86	40	93	39	4.06912	2.182	3.81956	2.8968	4.32936	2.85844	5.57838	2.62218	4.42656	2.0951	4.76016	2.26	1.86486	1.31854	1.51459	2.12738	2.11282	2.10627	-0.433909	0.0749318	1	-	-	-	+	+	+	Intron (XM_006564965.3/409752, intron 1 of 14)	6477760	6502539	24780	+	409752	XM_016912468.2
NC_037649.1	7476778	7477484	7477086;7477040;7477071	49	100	171	99	102	103	181	105	195	109	190	99	3.179	5.50955	8.01176	5.68	5.30862	5.71688	9.95358	4.79226	9.97248	5.621	9.67224	5.65	0.576998	1.41052	0.928587	2.07701	1.77415	1.7119	-0.931835	0.0493839	1	-	-	-	+	+	+	Intron (XM_026444430.1/409783, intron 3 of 15)	7367140	7532749	165610	-	409783	XM_026444430.1
NC_037638.1	5375543	5376261	5375798;5376079;5375731;5375945;5376017	33	88	145	97	42	100	144	100	158	77	187	70	2.16172	4.85495	6.80068	5.5664	2.21622	5.55197	7.93005	4.56621	8.08992	3.9858	9.52032	4.0115	0.445261	1.22174	0.399177	1.73668	2.02969	2.37326	-1.57119	0.0176802	1	-	-	-	+	+	+	Promoter (2-3kb)	5372582	5374100	1519	+	409798	NM_001011636.1
NC_037642.1	8315979	8316380	8316118;8316181;8316194	62	62	112	65	76	61	149	81	125	56	114	64	4.00554	3.43665	5.26354	3.7488	3.96858	3.40814	8.2035	3.70722	6.41088	2.9127	5.8236	3.6725	1.16554	1.40406	1.16444	2.21284	2.20101	1.58573	-0.684126	0.0530998	1	-	-	-	+	+	+	Intron (XM_026440945.1/409818, intron 3 of 7)	8287731	8383943	96213	+	409818	XM_026440946.1
NC_037650.1	4417918	4418392	4418124;4418094;4418237	28	76	75	80	17	54	136	70	128	97	118	56	1.84382	4.20035	3.54008	4.6008	0.92772	3.02335	7.49253	3.20991	6.56352	5.0078	6.02616	3.2205	0.438968	0.769449	0.306852	2.33419	1.31066	1.87119	-1.86406	0.02965	1	-	-	-	+	+	+	Exon (XM_006559333.3/409827, exon 7 of 11)	4396000	4412453	16454	-	409826	XM_026444783.1
NC_037650.1	4441435	4441975	4441612;4441637;4441717	18	79	114	85	43	77	135	111	197	61	195	59	1.20802	4.364	5.3567	4.8848	2.26776	4.28766	7.43784	5.06352	10.0742	3.1682	9.92544	3.39	0.276815	1.09661	0.528904	1.46891	3.17979	2.92786	-1.99378	0.0533656	1	-	-	-	+	+	+	Promoter (1-2kb)	4440338	4451768	11431	+	409829	XM_006559335.3
NC_037642.1	6653531	6654321	6653745;6654141;6653768;6654148;6653766	27	63	69	99	30	74	195	112	253	106	228	94	1.78024	3.4912	3.2606	5.68	1.59774	4.12275	10.7192	5.10873	12.9235	5.4677	11.5966	5.3675	0.509922	0.574049	0.387542	2.09821	2.36361	2.16052	-2.17004	0.000141547	1	-	-	-	+	+	+	Promoter (<=1kb)	6640287	6653864	13578	-	409882	XM_016912174.2
NC_037642.1	6648238	6651182	6648663;6649004;6649444;6649878;6650900;6648635;6649093;6649878;6650320;6650943;6650928	32	236	110	260	75	276	399	322	1138	242	1469	274	2.09814	12.9284	5.17038	14.8248	3.91704	15.2267	21.876	14.6028	57.9523	12.4173	74.4408	15.5375	0.162289	0.348766	0.257248	1.49807	4.66706	4.79104	-3.83392	0.0872871	1	-	-	-	+	+	+	Promoter (2-3kb)	6640287	6653864	13578	-	409882	XM_016912174.2
NC_037642.1	6643678	6644470	6643889;6644302;6643915;6644196	59	104	84	95	52	73	188	114	227	89	187	90	3.8148	5.72775	3.9593	5.4528	2.73162	4.06778	10.3364	5.19915	11.6006	4.599	9.52032	5.1415	0.666021	0.726104	0.671526	1.98809	2.52242	1.85166	-1.62432	0.0190675	1	-	-	-	+	+	+	3' UTR	6640287	6653864	13578	-	409882	XM_016912174.2
NC_037640.1	8220453	8220853	8220557;8220651;8220666	16	73	83	47	16	64	97	50	114	74	128	48	1.08086	4.0367	3.91272	2.7264	0.87618	3.57305	5.35962	2.30571	5.8512	3.8325	6.53256	2.7685	0.267758	1.43512	0.245219	2.3245	1.52673	2.3596	-1.67272	0.0475141	1	-	-	-	+	+	+	Intron (XM_006563943.3/409893, intron 1 of 11)	8215549	8249707	34159	+	409893	XM_026439744.1
NC_037651.1	6537819	6538947	6538500;6538584;6538656	51	98	104	74	68	107	121	103	1052	87	1008	69	3.30616	5.40045	4.8909	4.26	3.55626	5.93676	6.67218	4.70184	53.5766	4.4968	51.0958	3.955	0.612201	1.1481	0.599024	1.41906	11.9144	12.9193	-3.47602	0.162387	1	-	-	-	+	+	+	Promoter (<=1kb)	6532578	6538496	5919	-	409894	XR_003306052.1
NC_037643.1	2390112	2391149	2390790;2390324;2390737;2390883	23	107	143	117	49	90	130	129	397	105	423	93	1.52592	5.8914	6.70752	6.7024	2.577	5.00227	7.16439	5.8773	20.2502	5.4166	21.4714	5.311	0.259008	1.00076	0.515166	1.21899	3.73854	4.04282	-2.34221	0.107452	1	-	-	-	+	+	+	Promoter (<=1kb)	2389203	2414071	24869	+	409908	XM_026441185.1
NC_037643.1	7426931	7427286	7427101;7427145;7427130	31	49	84	54	33	49	136	63	129	44	124	54	2.03456	2.7275	3.9593	3.124	1.75236	2.7485	7.49253	2.89344	6.6144	2.2995	6.33	3.1075	0.745943	1.26738	0.63757	2.58949	2.87645	2.03701	-1.50098	0.00774778	1	-	-	-	+	+	+	Intron (XM_393419.7/409928, intron 1 of 9)	7322449	7435260	112812	-	409928	XM_393419.7
NC_037643.1	7404580	7405355	7404767;7405161;7404762;7405157;7405188	53	116	149	105	31	110	279	123	295	140	214	90	3.43332	6.38235	6.987	6.0208	1.64928	6.10167	15.3132	5.60604	15.0605	7.2051	10.8876	5.1415	0.53794	1.16048	0.2703	2.73155	2.09026	2.11759	-1.81756	0.00900353	1	-	-	-	+	+	+	Intron (XM_393419.7/409928, intron 1 of 9)	7322449	7435260	112812	-	409928	XM_393419.7
NC_037638.1	19764356	19765083	19764548;19764574;19764566	75	85	111	90	63	81	401	87	324	65	259	72	4.83208	4.6913	5.21696	5.1688	3.29856	4.50754	21.9854	3.97848	16.536	3.3726	13.1664	4.1245	1.03001	1.00932	0.731787	5.52608	4.90304	3.19224	-2.29733	0.0331887	1	-	-	-	+	+	+	3' UTR	19768119	19773361	5243	-	409936	XM_016916376.2
NC_037638.1	19763267	19764126	19763726;19763791;19763840	81	126	103	80	68	81	214	138	308	141	273	113	5.21356	6.92785	4.84432	4.6008	3.55626	4.50754	11.7584	6.28419	15.7219	7.2562	13.8754	6.441	0.752551	1.05293	0.788958	1.87111	2.16669	2.15423	-1.25499	0.000893408	1	-	-	-	+	+	+	Exon (XM_006571240.3/409937, exon 19 of 24)	19768119	19773361	5243	-	409936	XM_016916376.2
NC_037639.1	15947250	15948209	15947857;15947859;15947859	79	54	81	98	55	54	110	83	593	73	859	66	5.0864	3.00025	3.81956	5.6232	2.88624	3.02335	6.07059	3.79764	30.2227	3.7814	43.5504	3.7855	1.69533	0.67925	0.95465	1.59852	7.99246	11.5045	-2.66368	0.17658	1	-	-	-	+	+	+	Promoter (<=1kb)	15942592	15948038	5447	-	410000	XM_393488.7
NC_037644.1	12466649	12467293	12466765;12467070;12466956	48	137	64	118	50	82	114	72	153	90	179	78	3.11542	7.5279	3.0277	6.7592	2.62854	4.56251	6.28935	3.30033	7.83552	4.6501	9.1152	4.4635	0.41385	0.447938	0.576117	1.90567	1.68502	2.04216	-1.9699	0.00151394	1	-	-	-	+	+	+	3' UTR	12471069	12481565	10497	+	410067	XM_393553.7
NC_037648.1	14809455	14810006	14809534;14809808;14809805	67	93	127	65	58	71	145	91	138	65	115	60	4.32344	5.1277	5.96224	3.7488	3.04086	3.95784	7.98474	4.15932	7.07232	3.3726	5.87424	3.4465	0.843154	1.59044	0.768313	1.91972	2.09699	1.70441	-0.837367	0.0683456	1	-	-	-	+	+	+	Promoter (1-2kb)	14807501	14821153	13653	+	410154	XM_016915087.2
NC_037647.1	9888911	9889702	9889010;9889280;9889578	54	83	72	84	58	108	91	106	164	106	155	101	3.4969	4.5822	3.40034	4.828	3.04086	5.99173	5.03148	4.83747	8.3952	5.4677	7.89984	5.763	0.763149	0.704296	0.50751	1.04011	1.53542	1.37079	-0.998685	0.0275246	1	-	-	-	+	+	+	Promoter (<=1kb)	9887979	9892715	4737	+	410197	NM_001083630.1
NC_037647.1	9236112	9236711	9236241;9236390;9236419	41	47	108	67	35	41	117	60	139	69	174	57	2.67036	2.6184	5.07722	3.8624	1.85544	2.30874	6.45342	2.75781	7.1232	3.577	8.862	3.277	1.01984	1.31452	0.803659	2.34005	1.99139	2.7043	-1.16484	0.00886359	1	-	-	-	+	+	+	3' UTR	9230605	9237044	6440	+	410211	XM_016914249.2
NC_037647.1	953915	954516	954085;954338;954263	30	91	93	61	43	76	149	95	173	83	145	79	1.97098	5.0186	4.37852	3.5216	2.26776	4.23269	8.2035	4.34016	8.85312	4.2924	7.39344	4.52	0.392735	1.24333	0.535773	1.89014	2.06251	1.63572	-1.36351	0.0325001	1	-	-	-	+	+	+	Intron (XM_393727.6/410245, intron 2 of 10)	949195	973394	24200	+	410245	XM_393727.6
NC_037648.1	7769353	7769870	7769474;7769543;7769641;7769724	85	89	138	71	96	73	122	121	168	81	127	66	5.46788	4.9095	6.47462	4.0896	4.99938	4.06778	6.72687	5.51562	8.59872	4.1902	6.48192	3.7855	1.11373	1.58319	1.22902	1.2196	2.0521	1.7123	-0.344266	0.291175	1	-	-	-	+	+	+	Intron (XM_026443961.1/410304, intron 1 of 10)	7355643	7784657	429015	-	410304	XM_026443961.1
NC_037648.1	10297040	10297484	10297270;10297282;10297336	68	65	83	62	74	54	128	80	150	63	183	72	4.38702	3.6003	3.91272	3.5784	3.8655	3.02335	7.05501	3.66201	7.68288	3.2704	9.31776	4.1245	1.21852	1.09343	1.27855	1.92654	2.34922	2.25912	-0.86398	0.00830374	1	-	-	-	+	+	+	Promoter (2-3kb)	10215242	10294674	79433	-	410309	NM_001080110.1
NC_037648.1	12881525	12882326	12881809;12881755;12881711;12881921;12882253	51	134	92	84	34	107	229	123	206	90	195	89	3.30616	7.36425	4.33194	4.828	1.8039	5.93676	12.5787	5.60604	10.5322	4.6501	9.92544	5.085	0.448947	0.897254	0.303853	2.24378	2.26494	1.95191	-1.96916	0.00361278	1	-	-	-	+	+	+	Promoter (<=1kb)	12873467	12882364	8898	-	410337	XM_026443541.1
NC_037649.1	11253479	11254480	11253714;11254179;11254250;11254234	46	91	123	124	38	100	217	114	371	123	266	95	2.98826	5.0186	5.77592	7.1	2.01006	5.55197	11.9224	5.19915	18.9274	6.3364	13.5209	5.424	0.595437	0.81351	0.362044	2.29314	2.98709	2.49279	-2.13392	0.0024142	1	-	-	-	+	+	+	Intron (XM_006566857.3/410380, intron 1 of 9)	11248840	11265289	16450	+	410380	XM_393860.7
NC_037649.1	11379714	11382519	11379932;11380206;11380655;11380946;11381819;11380223;11380648;11381030;11381881;11382017	81	224	201	219	83	271	258	285	961	237	1379	196	5.21356	12.2737	9.40916	12.496	4.32936	14.9518	14.1647	12.9301	48.9466	12.1618	69.8832	11.1305	0.424775	0.752974	0.289554	1.09548	4.02462	6.27853	-2.95762	0.157031	1	-	-	-	+	+	+	3' UTR	11380027	11385728	5702	-	410383	XM_016915575.2
NC_037649.1	10763833	10764127	10764019;10763971;10763982	10	40	88	37	16	46	70	36	88	34	92	32	0.69938	2.23655	4.14562	2.1584	0.87618	2.58359	3.88299	1.67277	4.52832	1.7885	4.70952	1.8645	0.312705	1.92069	0.339133	2.32129	2.53191	2.52589	-1.52026	0.0923257	1	-	-	-	+	+	+	3' UTR	10759854	10776387	16534	-	410398	XM_026444173.1
NC_037650.1	8907444	8907836	8907605;8907667;8907713	64	53	113	48	67	36	112	60	109	53	84	38	4.1327	2.9457	5.31012	2.7832	3.50472	2.03389	6.17997	2.75781	5.5968	2.7594	4.3044	2.2035	1.40296	1.90792	1.72316	2.2409	2.02827	1.95344	-0.305801	0.0970953	1	-	-	-	+	+	+	Intron (XM_006565071.3/410470, intron 2 of 13)	8899104	9104945	205842	+	410470	XM_006565067.3
NC_037651.1	4021147	4022021	4021507;4021904;4021457;4021590	24	70	138	79	39	69	139	100	202	105	270	81	1.5895	3.87305	6.47462	4.544	2.0616	3.8479	7.6566	4.56621	10.3286	5.4166	13.7234	4.633	0.4104	1.42487	0.535773	1.6768	1.90684	2.9621	-1.46503	0.0546309	1	-	-	-	+	+	+	Intron (XM_006560177.3/410480, intron 2 of 13)	4043690	4123712	80023	+	410480	XM_026445187.1
NC_037651.1	3951189	3951636	3951290;3951377;3951359	10	74	54	74	10	45	99	77	134	64	125	49	0.69938	4.09125	2.5619	4.26	0.56694	2.52862	5.469	3.52638	6.8688	3.3215	6.38064	2.825	0.170945	0.601385	0.224209	1.55088	2.06798	2.25863	-2.5602	0.0050104	1	-	-	-	+	+	+	Promoter (2-3kb)	3948496	4123712	175217	+	410480	XM_016916230.2
NC_037651.1	7271855	7273262	7271997;7271981;7272354;7272661;7273060;7273200	25	200	111	157	34	145	196	215	381	186	311	144	1.65308	10.9646	5.21696	8.9744	1.8039	8.02562	10.7739	9.76536	19.4362	9.5557	15.7997	8.1925	0.150765	0.581316	0.224768	1.10328	2.03399	1.92856	-2.40443	0.027809	1	-	-	-	+	+	+	Promoter (2-3kb)	7257199	7269844	12646	-	410497	XM_006562979.3
NC_037651.1	7631681	7632353	7632088;7632045;7632313	54	114	127	112	93	100	188	122	195	110	163	80	3.4969	6.27325	5.96224	6.4184	4.84476	5.55197	10.3364	5.56083	9.97248	5.6721	8.30496	4.5765	0.55743	0.928929	0.87262	1.85879	1.75816	1.8147	-1.20323	0.00912893	1	-	-	-	+	+	+	Exon (XR_001705570.2/107965522, exon 3 of 3)	7628194	7660371	32178	+	410506	XM_006562955.2
NC_037651.1	9308212	9309257	9308523;9309022;9308525;9308963;9308502	16	123	108	87	17	115	119	134	354	116	365	113	1.08086	6.7642	5.07722	4.9984	0.92772	6.37652	6.5628	6.10335	18.0624	5.9787	18.5342	6.441	0.159791	1.01577	0.14549	1.07528	3.02112	2.87753	-2.40029	0.0770679	1	-	-	-	+	+	+	3' UTR	9308534	9316355	7822	-	410545	XM_016916203.2
NC_037651.1	9338654	9340984	9338892;9339810;9340314;9340751;9338863;9339481;9339846;9340332;9340728	83	190	204	183	84	240	242	257	1158	219	1202	214	5.34072	10.4191	9.5489	10.4512	4.3809	13.2478	13.2897	11.6642	58.9699	11.242	60.9199	12.1475	0.512589	0.913665	0.330689	1.13936	5.2455	5.01502	-2.69788	0.135012	1	-	-	-	+	+	+	Promoter (<=1kb)	9335006	9339039	4034	-	410546	XM_006565778.3
NC_037652.1	8807387	8807860	8807664;8807566;8807622	78	74	96	46	99	75	100	56	173	83	124	45	5.02282	4.09125	4.51826	2.6696	5.154	4.17772	5.52369	2.57697	8.85312	4.2924	6.33	2.599	1.2277	1.69249	1.23369	2.14348	2.06251	2.43555	-0.677062	0.0147509	1	-	-	-	+	+	+	Promoter (<=1kb)	8801229	8806965	5737	-	410581	XM_016916680.2
NC_037652.1	6227105	6230708	6227592;6227818;6228256;6229038;6229592;6227568;6227518;6229695	87	214	128	246	151	225	314	322	1294	261	1849	208	5.59504	11.7283	6.00882	14.0296	7.83408	12.4232	17.2274	14.6028	65.8896	13.3882	93.684	11.8085	0.477055	0.428296	0.630601	1.17973	4.92147	7.93361	-3.1918	0.166452	1	-	-	-	+	+	+	Promoter (<=1kb)	6226750	6228691	1942	-	410617	XM_016916735.2
NC_037652.1	4699576	4700512	4699734;4699980;4700199;4700325;4700358	34	127	131	97	43	82	200	129	237	108	218	110	2.2253	6.9824	6.14856	5.5664	2.26776	4.56251	10.9927	5.8773	12.1094	5.5699	11.0902	6.2715	0.318701	1.10458	0.497042	1.87037	2.17408	1.76835	-1.59788	0.0169196	1	-	-	-	+	+	+	Exon (XM_016916549.2/410626, exon 4 of 5)	4693378	4705374	11997	-	410626	XM_016916549.2
NC_037652.1	3039680	3040742	3040092;3040574;3040034;3040019	20	79	58	81	51	87	117	99	485	108	604	60	1.33518	4.364	2.74822	4.6576	2.68008	4.83736	6.45342	4.521	24.7277	5.5699	30.6372	3.4465	0.305953	0.590051	0.554038	1.42743	4.43952	8.88937	-3.34717	0.177119	1	-	-	-	+	+	+	Promoter (<=1kb)	3039818	3048279	8462	+	410635	XM_003249539.4
NC_037653.1	7125474	7126982	7125735;7126332;7125658;7125788;7126288	80	148	233	139	109	153	196	167	545	171	586	152	5.14998	8.12795	10.8997	7.952	5.6694	8.46538	10.7739	7.59528	27.7805	8.7892	29.7257	8.6445	0.633614	1.37069	0.669716	1.4185	3.16075	3.43868	-1.58422	0.0919354	1	-	-	-	+	+	+	Promoter (2-3kb)	7037430	7129754	92325	-	410637	XM_016917003.2
NC_037653.1	6732006	6732334	6732162;6732167;6732194	10	43	34	31	9	50	169	77	102	40	113	47	0.69938	2.4002	1.6303	1.8176	0.5154	2.80347	9.2973	3.52638	5.24064	2.0951	5.77296	2.712	0.291384	0.896952	0.183844	2.6365	2.50138	2.12867	-2.4048	0.00297089	1	-	-	-	+	+	+	Distal Intergenic	6739645	6750350	10706	+	410639	XM_006563134.3
NC_037653.1	6730492	6731612	6730770;6730945;6731405;6731464	115	176	122	120	152	146	500	166	206	158	218	100	7.37528	9.65535	5.72934	6.8728	7.88562	8.08059	27.3997	7.55007	10.5322	8.1249	11.0902	5.7065	0.763854	0.833625	0.975872	3.62907	1.29629	1.94343	-1.41641	0.17471	1	-	-	-	+	+	+	Distal Intergenic	6685594	6724151	38558	-	410658	XM_026445853.1
NC_037653.1	6728222	6728914	6728548;6728552;6728468	34	125	162	112	58	106	263	105	218	110	221	92	2.2253	6.8733	7.59254	6.4184	3.04086	5.88179	14.4382	4.79226	11.1427	5.6721	11.2421	5.2545	0.32376	1.18293	0.516996	3.01282	1.96448	2.13952	-1.81424	0.0165124	1	-	-	-	+	+	+	Distal Intergenic	6685594	6724151	38558	-	410658	XM_026445853.1
NC_037638.1	27482891	27483604	27483266;27483182;27483229	11	77	72	73	15	76	159	89	253	94	370	69	0.76296	4.2549	3.40034	4.2032	0.82464	4.23269	8.7504	4.0689	12.9235	4.8545	18.7874	3.955	0.179313	0.808988	0.194826	2.15056	2.66217	4.75029	-3.01486	0.0641027	1	-	-	-	+	+	+	Intron (XM_026446160.1/725081, intron 7 of 12)	27486659	27490304	3646	+	410692	XM_006571702.3
NC_037638.1	11228049	11228415	11228236;11228226;11228224	33	43	103	50	34	45	82	34	128	54	89	31	2.16172	2.4002	4.84432	2.8968	1.8039	2.52862	4.53927	1.58235	6.56352	2.8105	4.5576	1.808	0.900642	1.6723	0.713393	2.86869	2.33536	2.5208	-1.23303	0.0203861	1	-	-	-	+	+	+	Intron (XM_006569610.3/410724, intron 1 of 6)	11205469	11217975	12507	-	410724	XM_394201.6
NC_037638.1	8995820	8996189	8995948;8996022;8996018	16	44	51	58	32	55	99	49	127	55	95	49	1.08086	2.45475	2.42216	3.3512	1.70082	3.07832	5.469	2.2605	6.51264	2.8616	4.86144	2.825	0.440314	0.722774	0.552516	2.41938	2.27587	1.72086	-1.90298	0.0100776	1	-	-	-	+	+	+	Intron (XM_026443702.1/410732, intron 1 of 5)	8534937	9003139	468203	-	410732	XM_026443702.1
NC_037638.1	1030227	1031078	1030389;1030379;1030454	26	23	54	42	40	72	93	50	135	50	252	43	1.71666	1.3092	2.5619	2.4424	2.11314	4.01281	5.14086	2.30571	6.91968	2.6061	12.8119	2.486	1.31123	1.04893	0.526599	2.22962	2.65519	5.15362	-1.79801	0.112763	1	-	-	-	+	+	+	Promoter (<=1kb)	1030583	1035250	4668	+	410766	XM_006557355.2
NC_037639.1	16062563	16067353	16062845;16063251;16063605;16063940;16064301;16065122;16065743;16066932;16063300;16063766;16064285;16065197;16065746;16066029;16063959;16064275	106	452	280	498	180	503	351	535	2106	504	2510	460	6.80306	24.7111	13.089	28.3432	9.32874	27.7049	19.2509	24.2326	107.204	25.8055	127.157	26.0465	0.275304	0.461804	0.336718	0.794422	4.15431	4.88192	-3.19453	0.146009	1	-	-	-	+	+	+	Promoter (<=1kb)	16062886	16070580	7695	+	410805	XM_016918121.2
NC_037639.1	15454054	15455407	15454318;15454341;15455080;15454228;15455127	38	96	118	101	83	96	141	106	491	89	681	68	2.47962	5.29135	5.54302	5.7936	4.32936	5.33209	7.76598	4.83747	25.033	4.599	34.5365	3.8985	0.468618	0.956749	0.811944	1.60538	5.44314	8.85892	-2.82986	0.161035	1	-	-	-	+	+	+	Promoter (<=1kb)	15449020	15454571	5552	-	410811	XM_026438854.1
NC_037639.1	11590525	11590958	11590715;11590732;11590735	6	69	77	72	13	70	142	62	177	80	158	57	0.44506	3.8185	3.63324	4.1464	0.72156	3.90287	7.82067	2.84823	9.05664	4.1391	8.05176	3.277	0.116554	0.87624	0.184879	2.7458	2.18807	2.45705	-2.64982	0.00345619	1	-	-	-	+	+	+	Promoter (<=1kb)	11582377	11590912	8536	-	410862	XM_006568197.3
NC_037640.1	12046065	12047912	12046230;12046893;12047243;12047709;12046865;12047296	66	115	146	124	81	165	126	187	374	145	533	146	4.25986	6.3278	6.84726	7.1	4.22628	9.12502	6.94563	8.49948	19.08	7.4606	27.0418	8.3055	0.673198	0.964403	0.463153	0.817183	2.55744	3.25589	-1.65821	0.168384	1	-	-	-	+	+	+	Intron (XM_026439425.1/410918, intron 3 of 3)	12034869	12069261	34393	+	410918	XM_026439426.1
NC_037640.1	11643141	11644444	11643463;11644093;11644315;11643421;11643475	15	118	59	87	31	117	136	169	468	128	569	90	1.01728	6.49145	2.7948	4.9984	1.64928	6.48646	7.49253	7.6857	23.8627	6.5919	28.8648	5.1415	0.156711	0.559139	0.254265	0.974866	3.62	5.61408	-3.39554	0.147887	1	-	-	-	+	+	+	3' UTR	11643215	11647782	4568	-	410924	XM_394400.6
NC_037640.1	5737781	5738289	5737942;5738043;5738083	72	62	111	66	78	76	156	84	170	63	159	63	4.64134	3.43665	5.21696	3.8056	4.07166	4.23269	8.58633	3.84285	8.70048	3.2704	8.1024	3.616	1.35054	1.37086	0.961956	2.23437	2.66037	2.24071	-0.95398	0.00407913	1	-	-	-	+	+	+	Intron (XM_026439411.1/410951, intron 2 of 13)	5716966	6016825	299860	+	410951	XM_026439412.1
NC_037640.1	5749485	5749950	5749730;5749676;5749734	60	66	82	60	78	86	183	84	140	74	136	65	3.87838	3.65485	3.86614	3.4648	4.07166	4.78239	10.063	3.84285	7.17408	3.8325	6.93768	3.729	1.06116	1.11583	0.851386	2.61863	1.87191	1.86047	-1.06844	0.0373981	1	-	-	-	+	+	+	Intron (XM_026439411.1/410951, intron 2 of 13)	5716966	6016825	299860	+	410951	XM_026439412.1
NC_037640.1	5403744	5404745	5403927;5404463;5403905;5404022;5404510	59	133	95	103	53	94	166	89	247	112	238	80	3.8148	7.3097	4.47168	5.9072	2.78316	5.22215	9.13323	4.0689	12.6182	5.7743	12.103	4.5765	0.521882	0.756988	0.532953	2.24464	2.18523	2.6446	-1.96518	0.00161481	1	-	-	-	+	+	+	Promoter (<=1kb)	5403848	5413940	10093	+	410960	XM_026439441.1
NC_037640.1	2752066	2752674	2752329;2752310;2752194;2752488	48	100	158	100	77	89	126	121	185	78	203	74	3.11542	5.50955	7.40622	5.7368	4.02012	4.9473	6.94563	5.51562	9.46368	4.0369	10.3306	4.2375	0.565458	1.291	0.812589	1.25927	2.34429	2.4379	-1.17857	0.0771162	1	-	-	-	+	+	+	Intron (XM_006558445.3/410975, intron 1 of 11)	2739729	2789470	49742	+	410975	XM_394451.6
NC_037641.1	5017201	5017587	5017386;5017352;5017445	64	58	88	58	72	49	115	82	134	67	133	61	4.1327	3.21845	4.14562	3.3512	3.76242	2.7485	6.34404	3.75243	6.8688	3.4748	6.78576	3.503	1.28407	1.23706	1.3689	1.69065	1.97675	1.93713	-0.526814	0.0129472	1	-	-	-	+	+	+	Promoter (<=1kb)	5016661	5017635	975	-	411045	NM_001142656.2
NC_037641.1	4659825	4660446	4660054;4660000;4660283;4660335	18	116	102	71	25	88	96	86	265	92	183	75	1.20802	6.38235	4.79774	4.0896	1.34004	4.89233	5.30493	3.93327	13.5341	4.7523	9.31776	4.294	0.189275	1.17316	0.273906	1.34873	2.84791	2.16995	-1.96005	0.0473099	1	-	-	-	+	+	+	Intron (XM_016911659.2/411048, intron 1 of 6)	4630086	4663674	33589	-	411048	XM_016911659.2
NC_037641.1	4639977	4640745	4640359;4640537;4640554	61	105	151	107	71	99	205	91	215	75	199	77	3.94196	5.7823	7.08016	6.1344	3.71088	5.497	11.2661	4.15932	10.9901	3.8836	10.128	4.407	0.681729	1.15417	0.675074	2.70864	2.82987	2.29816	-1.64199	0.0014184	1	-	-	-	+	+	+	Intron (XM_016911659.2/411048, intron 2 of 6)	4630086	4663674	33589	-	411048	XM_016911659.2
NC_037642.1	6396344	6396914	6396710;6396735;6396689	59	82	106	86	45	82	127	79	166	77	180	79	3.8148	4.52765	4.98406	4.9416	2.37084	4.56251	7.00032	3.6168	8.49696	3.9858	9.16584	4.52	0.842556	1.00859	0.519635	1.9355	2.13181	2.02784	-1.3623	0.00655037	1	-	-	-	+	+	+	3' UTR	6390672	6524494	133823	+	411079	XM_394553.7
NC_037642.1	11333873	11334342	11334107;11334109;11334163	39	76	119	70	62	64	185	109	190	83	110	48	2.5432	4.20035	5.5896	4.0328	3.24702	3.57305	10.1723	4.9731	9.71808	4.2924	5.62104	2.7685	0.605473	1.38603	0.908753	2.04546	2.26402	2.03036	-1.12826	0.027373	1	-	-	-	+	+	+	Promoter (1-2kb)	11306646	11332505	25860	-	411114	XM_006567665.3
NC_037642.1	11334737	11335247	11334847;11335045;11334856	30	41	86	32	89	52	88	64	75	37	138	56	1.97098	2.2911	4.05246	1.8744	4.6386	2.91341	4.86741	2.93865	3.86688	1.9418	7.03896	3.2205	0.860277	2.162	1.59215	1.65634	1.99139	2.18567	-0.338184	0.400455	1	-	-	-	+	+	+	Promoter (<=1kb)	11306646	11335913	29268	-	411114	XM_006567654.3
NC_037642.1	12207895	12209082	12208270;12208991;12208277;12208307	45	100	116	101	44	85	121	122	874	103	992	92	2.92468	5.50955	5.44986	5.7936	2.3193	4.72742	6.67218	5.56083	44.52	5.3144	50.2855	5.2545	0.530838	0.940669	0.490606	1.19985	8.37724	9.56999	-3.28664	0.159386	1	-	-	-	+	+	+	Promoter (<=1kb)	12208032	12212944	4913	+	411121	XM_006569500.3
NC_037642.1	13519145	13519412	13519271;13519281;13519271	5	42	71	20	28	41	83	36	76	30	80	36	0.38148	2.34565	3.35376	1.1928	1.49466	2.30874	4.59396	1.67277	3.91776	1.5841	4.10184	2.0905	0.162633	2.81167	0.647392	2.74632	2.47318	1.96213	-0.987646	0.279781	1	-	-	-	+	+	+	Promoter (<=1kb)	13519267	13531278	12012	+	411132	XM_026440533.1
NC_037643.1	14271267	14272054	14271726;14271565;14271638	36	89	50	74	77	66	97	63	555	68	568	52	2.35246	4.9095	2.37558	4.26	4.02012	3.68299	5.35962	2.89344	28.2893	3.5259	28.8142	2.9945	0.479165	0.557648	1.09154	1.85233	8.02328	9.62237	-3.19552	0.133541	1	-	-	-	+	+	+	Promoter (<=1kb)	14269639	14271891	2253	-	411145	XM_394619.7
NC_037645.1	964393	965367	964867;965142;964624;965140;965219	88	180	232	130	102	123	266	146	281	151	255	129	5.65862	9.87355	10.8531	7.4408	5.30862	6.81628	14.6022	6.64587	14.3482	7.7672	12.9638	7.345	0.573109	1.45859	0.778815	2.19718	1.84728	1.76498	-1.04757	0.0457938	1	-	-	-	+	+	+	Promoter (2-3kb)	847598	967564	119967	-	411238	XM_026442371.1
NC_037645.1	5115235	5116580	5115811;5116241;5115907;5116007	36	136	122	137	69	114	181	165	1172	146	1276	119	2.35246	7.47335	5.72934	7.8384	3.6078	6.32155	9.95358	7.50486	59.6822	7.5117	64.6673	6.78	0.31478	0.730932	0.570714	1.32628	7.94523	9.53795	-3.54058	0.149942	1	-	-	-	+	+	+	Promoter (<=1kb)	5110573	5115327	4755	-	411252	XM_016913358.2
NC_037645.1	10963751	10964813	10964163;10964040;10964615;10964138;10964596	70	151	148	118	85	114	182	175	259	143	236	118	4.51418	8.2916	6.94042	6.7592	4.43244	6.32155	10.0083	7.95696	13.2288	7.3584	12.0017	6.7235	0.544428	1.02681	0.701163	1.2578	1.79778	1.78504	-1.09097	0.0215497	1	-	-	-	+	+	+	Intron (XM_016913390.2/411288, intron 3 of 6)	10955749	10976842	21094	-	411288	XM_016913390.2
NC_037646.1	11285150	11286178	11285702;11285696;11285682	47	69	82	74	39	88	131	104	608	79	768	80	3.05184	3.8185	3.86614	4.26	2.0616	4.89233	7.21908	4.74705	30.9859	4.088	38.9422	4.5765	0.799225	0.907545	0.421394	1.52075	7.57972	8.50917	-3.04868	0.142063	1	-	-	-	+	+	+	Promoter (<=1kb)	11283343	11285856	2514	-	411299	XM_394773.7
NC_037644.1	12270529	12270990	12270741;12270731;12270822	71	64	80	60	74	71	257	76	120	60	115	60	4.57776	3.54575	3.77298	3.4648	3.8655	3.95784	14.11	3.48117	6.15648	3.1171	5.87424	3.4465	1.29106	1.08895	0.976669	4.05323	1.97507	1.70441	-1.20394	0.186521	1	-	-	-	+	+	+	Intron (XM_006568328.3/411534, intron 1 of 13)	12201790	12274276	72487	-	411534	XM_006568328.3
NC_037644.1	12255181	12256334	12255317;12255674;12255974;12255498;12256053	35	100	114	89	37	125	121	114	322	134	252	117	2.28888	5.50955	5.3567	5.112	1.95852	6.92622	6.67218	5.19915	16.4342	6.8985	12.8119	6.667	0.415439	1.04787	0.282769	1.28332	2.38229	1.92169	-1.67803	0.0359761	1	-	-	-	+	+	+	Intron (XM_395005.7/411534, intron 1 of 12)	12201790	12259771	57982	-	411534	XM_395005.7
NC_037644.1	12267588	12268080	12267758;12267780;12267869	82	121	99	78	90	68	149	96	139	59	106	63	5.27714	6.6551	4.658	4.4872	4.69014	3.79293	8.2035	4.38537	7.1232	3.066	5.41848	3.616	0.792947	1.03806	1.23655	1.87065	2.32329	1.49847	-0.891949	0.0466738	1	-	-	-	+	+	+	Intron (XM_006568328.3/411534, intron 1 of 13)	12201790	12274276	72487	-	411534	XM_006568328.3
NC_037644.1	1938159	1938641	1938448;1938411;1938392	48	72	86	58	56	68	147	53	140	79	166	55	3.11542	3.98215	4.05246	3.3512	2.93778	3.79293	8.09412	2.44134	7.17408	4.088	8.45688	3.164	0.782346	1.20926	0.774541	3.31544	1.75491	2.67284	-1.48505	0.0559931	1	-	-	-	+	+	+	Promoter (1-2kb)	1861408	1940243	78836	-	411586	XM_006558791.2
NC_037644.1	1936447	1936871	1936662;1936767;1936669	59	79	108	65	55	65	194	61	126	60	107	39	3.8148	4.364	5.07722	3.7488	2.88624	3.62802	10.6646	2.80302	6.46176	3.1171	5.46912	2.26	0.874152	1.35436	0.795541	3.80468	2.073	2.41996	-1.45622	0.0677875	1	-	-	-	+	+	+	Intron (XM_006558791.2/411586, intron 1 of 7)	1861408	1940243	78836	-	411586	XM_006558791.2
NC_037649.1	3909290	3910840	3909862;3910235;3910674;3909836;3909884	52	133	182	169	57	133	212	151	295	163	439	112	3.36974	7.3097	8.52414	9.656	2.98932	7.36598	11.649	6.87192	15.0605	8.3804	22.2816	6.3845	0.460996	0.882782	0.405828	1.69516	1.79711	3.48995	-1.99666	0.0873422	1	-	-	-	+	+	+	Promoter (<=1kb)	3908373	3916277	7905	+	411622	XM_395092.7
NC_037642.1	12081308	12082741	12081705;12081778;12081789;12082625	47	91	86	97	47	122	113	121	854	133	863	108	3.05184	5.0186	4.05246	5.5664	2.47392	6.76131	6.23466	5.51562	43.5024	6.8474	43.753	6.1585	0.608106	0.728022	0.365894	1.13036	6.35313	7.10449	-3.09946	0.149118	1	-	-	-	+	+	+	Promoter (<=1kb)	12081500	12083527	2028	+	411647	XM_624354.6
NC_037645.1	8874774	8876467	8875054;8875854;8876220;8875037;8875056;8875819;8876256	32	140	88	144	44	141	157	184	757	97	766	131	2.09814	7.69155	4.14562	8.236	2.3193	7.80574	8.64102	8.36385	38.567	5.0078	38.8409	7.458	0.272785	0.503354	0.297127	1.03314	7.70139	5.20795	-3.69941	0.15804	1	-	-	-	+	+	+	Promoter (<=1kb)	8870953	8875184	4232	-	411652	XM_006566832.3
NC_037639.1	10513370	10514037	10513692;10513791;10513603	18	91	99	61	14	88	95	70	370	92	317	52	1.20802	5.0186	4.658	3.5216	0.7731	4.89233	5.25024	3.20991	18.8765	4.7523	16.1035	2.9945	0.240709	1.32269	0.158023	1.63563	3.97208	5.37769	-2.67391	0.0928636	1	-	-	-	+	+	+	Promoter (<=1kb)	10513391	10518691	5301	+	411671	XM_006565848.3
NC_037652.1	5798462	5800870	5798959;5799540;5800111;5800597;5798830;5798851;5800119;5800578	64	146	152	180	143	174	196	201	1054	186	1583	195	4.1327	8.01885	7.12674	10.2808	7.42176	9.61975	10.7739	9.13242	53.6784	9.5557	80.2138	11.074	0.515373	0.693209	0.771513	1.17974	5.61742	7.24344	-2.82596	0.156525	1	-	-	-	+	+	+	Promoter (<=1kb)	5790955	5800366	9412	-	411724	XM_395192.7
NC_037642.1	13396482	13396912	13396711;13396696;13396723	28	45	102	43	14	45	127	64	140	67	113	41	1.84382	2.5093	4.79774	2.4992	0.7731	2.52862	7.00032	2.93865	7.17408	3.4748	5.77296	2.373	0.734795	1.91971	0.30574	2.38216	2.0646	2.43277	-1.21659	0.106565	1	-	-	-	+	+	+	Promoter (1-2kb)	13395383	13414449	19067	+	411738	XM_006570197.3
NC_037645.1	1939273	1940047	1939394;1939613;1939880;1939908	31	67	90	84	52	79	98	74	186	61	186	64	2.03456	3.7094	4.23878	4.828	2.73162	4.3976	5.41431	3.39075	9.51456	3.1682	9.46968	3.6725	0.548488	0.877958	0.621162	1.59679	3.00314	2.57854	-1.80974	0.0477917	1	-	-	-	+	+	+	Distal Intergenic	1932817	1936648	3832	+	411841	XM_395308.6
NC_037643.1	7132375	7133177	7132728;7132800;7132758	28	56	55	69	53	67	128	75	775	75	942	73	1.84382	3.10935	2.60848	3.976	2.78316	3.73796	7.05501	3.43596	39.4829	3.8836	47.7535	4.181	0.592992	0.656056	0.744567	2.05329	10.1666	11.4215	-3.56786	0.133218	1	-	-	-	+	+	+	Promoter (<=1kb)	7132537	7135143	2607	+	411970	XM_395437.7
NC_037638.1	10797402	10798026	10797642;10797653;10797627	31	46	72	32	66	39	105	31	463	37	464	43	2.03456	2.56385	3.40034	1.8744	3.45318	2.1988	5.79714	1.44672	23.6083	1.9418	23.5476	2.486	0.793557	1.8141	1.57048	4.00709	12.1579	9.47208	-2.6173	0.0940868	1	-	-	-	+	+	+	Promoter (<=1kb)	10797491	10801451	3961	+	412164	XM_006568591.3
NC_037638.1	15122741	15123101	15122905;15122901;15122920	7	20	76	45	14	44	95	55	102	39	110	31	0.50864	1.14555	3.58666	2.6128	0.7731	2.47365	5.25024	2.53176	5.24064	2.044	5.62104	1.808	0.444014	1.37273	0.312534	2.07375	2.56391	3.10898	-1.86321	0.0142734	1	-	-	-	+	+	+	Promoter (<=1kb)	15120592	15123437	2846	-	412196	XM_395658.7
NC_037650.1	10724117	10725040	10724311;10724945;10724408;10724366;10724894	54	89	176	134	75	112	351	118	303	119	265	104	3.4969	4.9095	8.24466	7.668	3.91704	6.21161	19.2509	5.37999	15.4675	6.132	13.4702	5.9325	0.712272	1.0752	0.6306	3.57824	2.52242	2.27058	-1.79158	0.0281589	1	-	-	-	+	+	+	Promoter (1-2kb)	10723047	10725867	2821	+	412209	XM_395671.6
NC_037648.1	8042804	8043909	8043017;8043073;8043622;8043656;8043679	23	99	53	103	40	86	97	118	527	95	503	86	1.52592	5.455	2.51532	5.9072	2.11314	4.78239	5.35962	5.37999	26.8646	4.9056	25.5226	4.9155	0.279729	0.425806	0.441859	0.996214	5.47631	5.19227	-3.34573	0.13639	1	-	-	-	+	+	+	Promoter (<=1kb)	8042408	8043386	979	-	412247	XM_006563302.3
NC_037643.1	15475719	15476570	15476062;15476056;15476097	61	89	119	93	97	110	235	138	325	116	378	100	3.94196	4.9095	5.5896	5.3392	5.05092	6.10167	12.9068	6.28419	16.5869	5.9787	19.1926	5.7065	0.802925	1.0469	0.827793	2.05385	2.77433	3.36329	-1.61317	0.0353852	1	-	-	-	+	+	+	Promoter (<=1kb)	15476017	15486472	10456	+	412279	XM_026441477.1
NC_037649.1	7827802	7828691	7828342;7828375;7828404	42	95	126	88	51	75	126	116	583	80	553	74	2.73394	5.2368	5.91566	5.0552	2.68008	4.17772	6.94563	5.28957	29.7139	4.1391	28.0546	4.2375	0.522063	1.17021	0.641517	1.31308	7.17883	6.62055	-2.69499	0.148842	1	-	-	-	+	+	+	Promoter (<=1kb)	7827912	7829831	1920	+	412309	XM_395770.6
NC_037653.1	4936586	4937914	4937471;4937493;4937529	87	105	134	125	143	139	176	172	1724	128	1895	109	5.59504	5.7823	6.2883	7.1568	7.42176	7.6958	9.68013	7.82133	87.768	6.5919	96.0134	6.215	0.967615	0.878647	0.964391	1.23766	13.3145	15.4487	-3.41603	0.177056	1	-	-	-	+	+	+	Promoter (<=1kb)	4934537	4937271	2735	-	412357	XM_026445841.1
NC_037648.1	13629084	13629925	13629439;13629460;13629440	50	76	82	71	78	65	116	93	683	70	702	59	3.24258	4.20035	3.86614	4.0896	4.07166	3.62802	6.39873	4.24974	34.8019	3.6281	35.5999	3.39	0.771979	0.945359	1.12228	1.50568	9.59232	10.5014	-2.92722	0.160096	1	-	-	-	+	+	+	Promoter (<=1kb)	13629204	13632104	2901	+	412414	XM_006566479.3
NC_037642.1	9448879	9449305	9449045;9449043;9449088	19	15	83	29	22	24	150	41	102	25	154	21	1.2716	0.8728	3.91272	1.704	1.18542	1.37425	8.25819	1.89882	5.24064	1.3286	7.8492	1.243	1.45692	2.2962	0.862594	4.34912	3.94448	6.31472	-1.66217	0.0260454	1	-	-	-	+	+	+	Promoter (1-2kb)	9447807	9457322	9516	+	412543	XM_026440858.1
NC_037641.1	18161	19060	18599;18396;18787;18930	17	110	81	100	37	121	126	133	268	117	389	70	1.14444	6.05505	3.81956	5.7368	1.95852	6.70634	6.94563	6.05814	13.6867	6.0298	19.7496	4.0115	0.189006	0.6658	0.29204	1.1465	2.26984	4.92325	-2.8623	0.163535	1	-	-	-	+	+	+	Promoter (2-3kb)	15831	17651	1821	+	412596	XM_396051.7
NC_037641.1	8013930	8014632	8014116;8014353;8014517	108	115	146	89	101	100	238	145	206	85	184	90	6.93022	6.3278	6.84726	5.112	5.25708	5.55197	13.0709	6.60066	10.5322	4.3946	9.3684	5.1415	1.0952	1.33945	0.946886	1.98024	2.39662	1.82211	-0.874352	0.014184	1	-	-	-	+	+	+	3' UTR	8024206	8035902	11697	+	412703	XM_016911912.2
NC_037649.1	9300958	9301425	9301118;9301172;9301273;9301345	34	75	91	77	57	69	129	82	147	82	131	76	2.2253	4.1458	4.28536	4.4304	2.98932	3.8479	7.1097	3.75243	7.53024	4.2413	6.68448	4.3505	0.53676	0.967263	0.776871	1.89469	1.77546	1.53649	-1.19075	0.00428743	1	-	-	-	+	+	+	Promoter (1-2kb)	9277171	9302503	25333	-	412788	XM_006566935.3
NC_037648.1	8058074	8058557	8058407;8058323;8058305	25	49	86	70	49	43	108	57	115	43	144	38	1.65308	2.7275	4.05246	4.0328	2.577	2.41868	5.96121	2.62218	5.90208	2.2484	7.3428	2.2035	0.606079	1.00488	1.06546	2.27338	2.62501	3.33233	-1.62072	0.0146163	1	-	-	-	+	+	+	Intron (XM_026443796.1/412842, intron 2 of 9)	8052806	8071425	18620	+	412842	XM_396294.7
NC_037640.1	4699420	4700591	4699534;4700200;4700219;4700194	42	86	81	105	36	96	127	111	680	95	630	84	2.73394	4.74585	3.81956	6.0208	1.90698	5.33209	7.00032	5.06352	34.6493	4.9056	31.9538	4.8025	0.57607	0.634394	0.357642	1.3825	7.06321	6.65358	-3.26739	0.132239	1	-	-	-	+	+	+	Promoter (<=1kb)	4701410	4705235	3826	+	412846	XM_396298.7
NC_037652.1	7852780	7854329	7852975;7853345;7853801;7853374;7853878;7853345	44	203	123	188	49	195	183	204	820	185	754	171	2.8611	11.1282	5.77592	10.7352	2.577	10.7741	10.063	9.26805	41.7725	9.5046	38.2332	9.718	0.257104	0.538036	0.239185	1.08577	4.39498	3.93427	-3.18628	0.112951	1	-	-	-	+	+	+	Promoter (<=1kb)	7852048	7854763	2716	+	412886	XM_396338.7
NC_037647.1	8324432	8325361	8325076;8325023;8325195	40	108	125	79	75	114	143	86	275	81	339	86	2.60678	5.94595	5.86908	4.544	3.91704	6.32155	7.87536	3.93327	14.0429	4.1902	17.2176	4.9155	0.438413	1.29161	0.619633	2.00224	3.35137	3.50272	-1.91426	0.0266215	1	-	-	-	+	+	+	Promoter (<=1kb)	8211053	8325218	114166	-	412916	XM_026443509.1
NC_037651.1	5444599	5446675	5445546;5445929;5446289;5445247;5445582;5445869;5446290;5446495	54	106	77	154	102	175	213	236	1120	136	1769	146	3.4969	5.83685	3.63324	8.804	5.30862	9.67472	11.7037	10.7148	57.0365	7.0007	89.6328	8.3055	0.599107	0.412681	0.54871	1.09229	8.14726	10.792	-3.68219	0.16724	1	-	-	-	+	+	+	Promoter (<=1kb)	5444056	5446469	2414	-	412975	XM_396426.7
NC_037645.1	9780099	9781334	9780277;9780923;9780281;9780965;9780936	36	128	118	86	44	125	137	104	580	117	655	89	2.35246	7.03695	5.54302	4.9416	2.3193	6.92622	7.54722	4.74705	29.5613	6.0298	33.2198	5.085	0.334301	1.12171	0.334858	1.58988	4.90253	6.5329	-2.86259	0.119208	1	-	-	-	+	+	+	Promoter (<=1kb)	9780673	9798779	18107	+	413052	XM_016913467.2
NC_037648.1	705426	706124	705644;705668;706045;705855	120	122	134	102	109	83	153	96	192	99	174	88	7.69318	6.70965	6.2883	5.8504	5.6694	4.61748	8.42226	4.38537	9.81984	5.11	8.862	5.0285	1.14658	1.07485	1.22781	1.92054	1.92169	1.76235	-0.700325	0.000562436	1	-	-	-	+	+	+	Distal Intergenic	738073	743171	5099	+	413054	XM_026443901.1
NC_037639.1	6545892	6546430	6546204;6546178;6546140	50	78	125	73	67	76	202	94	139	74	160	55	3.24258	4.30945	5.86908	4.2032	3.50472	4.23269	11.1021	4.29495	7.1232	3.8325	8.15304	3.164	0.752435	1.39634	0.828012	2.58492	1.85863	2.57681	-1.23779	0.0136587	1	-	-	-	+	+	+	Intron (XM_396511.7/413060, intron 1 of 5)	6563812	6575110	11299	+	413060	XM_016910962.2
NC_037639.1	14847069	14848216	14847752;14847744;14847621	61	96	80	79	93	121	109	115	975	105	1197	70	3.94196	5.29135	3.77298	4.544	4.84476	6.70634	6.0159	5.24436	49.6589	5.4166	60.6667	4.0115	0.744982	0.830321	0.722415	1.14712	9.16791	15.1232	-3.46872	0.19707	1	-	-	-	+	+	+	Promoter (<=1kb)	14846081	14848076	1996	-	413164	XM_396615.6
NC_037645.1	3673745	3674242	3673970;3673917;3673835	87	79	110	76	87	70	156	86	130	70	137	61	5.59504	4.364	5.17038	4.3736	4.53552	3.90287	8.58633	3.93327	6.66528	3.6281	6.98832	3.503	1.28209	1.18218	1.1621	2.183	1.83713	1.99495	-0.730059	0.00859984	1	-	-	-	+	+	+	Intron (XM_396634.6/413183, intron 2 of 4)	3647580	3694246	46667	+	413183	XM_396634.6
NC_037643.1	1639871	1640223	1640070;1640071;1640096	19	50	78	42	19	58	82	51	105	56	108	43	1.2716	2.78205	3.67982	2.4424	1.0308	3.24323	4.53927	2.35092	5.39328	2.9127	5.51976	2.486	0.457073	1.50664	0.317831	1.93085	1.85164	2.22034	-1.39563	0.0702075	1	-	-	-	+	+	+	Promoter (1-2kb)	1640473	1642173	1701	-	413205	XM_016912527.1
NC_037651.1	2907306	2907868	2907468;2907494;2907800	75	71	141	71	86	69	106	74	167	102	148	70	4.83208	3.9276	6.61436	4.0896	4.48398	3.8479	5.85183	3.39075	8.54784	5.2633	7.54536	4.0115	1.23029	1.61736	1.16531	1.72582	1.62405	1.88093	-0.382367	0.0834095	1	-	-	-	+	+	+	Promoter (<=1kb)	2820839	2907855	87017	-	413213	XM_006559281.3
NC_037645.1	12101381	12103040	12101670;12102354;12101681;12102365;12102851;12102299	41	194	264	213	98	192	192	203	664	182	645	166	2.67036	10.6372	12.3437	12.1552	5.10246	10.6092	10.5552	9.22284	33.8352	9.3513	32.7134	9.4355	0.25104	1.01551	0.480947	1.14446	3.61823	3.46706	-2.23556	0.104875	1	-	-	-	+	+	+	Promoter (<=1kb)	12011694	12102557	90864	-	413215	XM_026442513.1
NC_037645.1	12098127	12098759	12098245;12098294;12098604;12098632	16	89	72	112	13	90	139	110	151	84	191	90	1.08086	4.9095	3.40034	6.4184	0.72156	5.00227	7.6566	5.01831	7.73376	4.3435	9.72288	5.1415	0.220157	0.52978	0.144247	1.52573	1.78054	1.89106	-2.53913	0.000886441	1	-	-	-	+	+	+	Intron (XM_026442513.1/413215, intron 1 of 9)	12011694	12102557	90864	-	413215	XM_026442513.1
NC_037645.1	12613680	12614356	12613879;12614238;12613831;12614208;12614155	17	90	123	88	18	70	135	127	187	77	186	81	1.14444	4.96405	5.77592	5.0552	0.97926	3.90287	7.43784	5.78688	9.56544	3.9858	9.46968	4.633	0.230546	1.14257	0.250908	1.28529	2.39988	2.04396	-1.81875	0.0376174	1	-	-	-	+	+	+	Exon (XM_624248.6/551863, exon 4 of 7)	12603686	12610248	6563	-	413263	XM_006569816.3
NC_037646.1	3031763	3032182	3031969;3031973;3032000	13	35	30	61	8	50	149	62	142	41	118	27	0.89012	1.9638	1.44398	3.5216	0.46386	2.80347	8.2035	2.84823	7.27584	2.1462	6.02616	1.582	0.453264	0.410035	0.165459	2.88021	3.3901	3.8092	-3.29245	0.00418524	1	-	-	-	+	+	+	Exon (XM_026442930.1/413274, exon 7 of 17)	3011821	3036261	24441	-	413274	XM_026442930.1
NC_037646.1	3030552	3031500	3030884;3030846;3031265	50	93	73	92	48	112	202	117	236	123	163	70	3.24258	5.1277	3.44692	5.2824	2.52546	6.21161	11.1021	5.33478	12.0586	6.3364	8.30496	4.0115	0.632365	0.652529	0.406571	2.08108	1.90307	2.07029	-1.83972	0.000207262	1	-	-	-	+	+	+	Exon (XM_026442930.1/413274, exon 8 of 17)	3011821	3036261	24441	-	413274	XM_026442930.1
NC_037651.1	10564135	10564553	10564331;10564370;10564429	1	40	32	26	6	40	73	54	108	37	116	59	0.12716	2.23655	1.53714	1.5336	0.36078	2.25377	4.04706	2.48655	5.54592	1.9418	5.92488	3.39	0.0568554	1.00231	0.160078	1.62758	2.85607	1.74775	-2.35357	0.0304139	1	-	-	-	+	+	+	3' UTR	10560381	10563783	3403	+	413285	XM_396730.5
NC_037651.1	10565116	10566268	10565336;10565337;10565715;10565853;10566087	63	128	123	117	77	120	207	168	281	162	352	103	4.06912	7.03695	5.77592	6.7024	4.02012	6.65137	11.3755	7.64049	14.3482	8.3293	17.8759	5.876	0.578251	0.861769	0.604405	1.48884	1.72262	3.04219	-1.613	0.0963779	1	-	-	-	+	+	+	Exon (XM_026444982.1/727312, exon 13 of 14)	10560381	10563783	3403	+	413285	XM_396730.5
NC_037651.1	10550816	10551523	10551191;10551164;10551205	22	101	34	94	14	83	110	114	197	96	237	90	1.46234	5.5641	1.6303	5.396	0.7731	4.61748	6.07059	5.19915	10.0742	4.9567	12.0523	5.1415	0.262817	0.302131	0.167429	1.16761	2.03244	2.34412	-2.92031	0.0433441	1	-	-	-	+	+	+	Distal Intergenic	10555782	10558750	2969	-	413286	XM_006565632.3
NC_037642.1	9341761	9342844	9342115;9342688;9342112;9342655;9342084	30	123	142	146	38	117	196	146	391	107	348	97	1.97098	6.7642	6.66094	8.3496	2.01006	6.48646	10.7739	6.64587	19.945	5.5188	17.6734	5.537	0.291384	0.797756	0.309886	1.62114	3.61401	3.19187	-2.5906	0.052324	1	-	-	-	+	+	+	Promoter (<=1kb)	9343095	9348959	5865	+	413370	XM_396815.6
NC_037653.1	1907232	1908009	1907529;1907980;1907723;1907734	18	94	149	109	101	95	160	93	273	89	285	101	1.20802	5.18225	6.987	6.248	5.25708	5.27712	8.80509	4.24974	13.9411	4.599	14.483	5.763	0.233107	1.11828	0.996202	2.07191	3.03133	2.5131	-1.69792	0.0109776	1	-	-	-	+	+	+	Intron (XM_396830.7/413385, intron 2 of 5)	1899176	1955358	56183	+	413385	XM_396830.7
NC_037653.1	1993838	1994443	1993976;1994258;1994250;1994306	81	107	100	67	74	83	92	84	138	83	141	56	5.21356	5.8914	4.70458	3.8624	3.8655	4.61748	5.08617	3.84285	7.07232	4.2924	7.19088	3.2205	0.884944	1.21805	0.837145	1.32354	1.64764	2.23285	-0.823745	0.087928	1	-	-	-	+	+	+	Promoter (<=1kb)	1961055	1994412	33358	-	413386	XM_006557764.3
NC_037640.1	8250247	8251173	8250486;8250974;8250490;8250914;8250855	31	133	115	156	36	104	91	114	226	108	276	90	2.03456	7.3097	5.40328	8.9176	1.90698	5.77185	5.03148	5.19915	11.5498	5.5699	14.0273	5.1415	0.278337	0.605912	0.330393	0.96775	2.07361	2.72825	-2.24794	0.0927428	1	-	-	-	+	+	+	3' UTR	8250819	8254807	3989	-	413404	XM_006563955.3
NC_037643.1	16648945	16650230	16649186;16649785;16649847;16649805	44	101	128	108	34	96	171	132	468	86	504	108	2.8611	5.5641	6.00882	6.1912	1.8039	5.33209	9.40668	6.01293	23.8627	4.4457	25.5732	6.1585	0.514207	0.970542	0.33831	1.56441	5.36759	4.1525	-2.60411	0.106686	1	-	-	-	+	+	+	Intron (XM_396918.7/413474, intron 1 of 7)	16637239	16644442	7204	-	413474	XM_006570889.3
NC_037643.1	16651624	16651943	16651760;16651777;16651809	2	14	63	18	2	23	86	54	79	21	95	20	0.19074	0.81825	2.98112	1.0792	0.15462	1.31928	4.75803	2.48655	4.0704	1.1242	4.86144	1.1865	0.233107	2.76234	0.1172	1.91351	3.62071	4.09729	-1.62962	0.121232	1	-	-	-	+	+	+	Promoter (2-3kb)	16637239	16654818	17580	-	413474	XM_396918.7
NC_037644.1	9596756	9597193	9596950;9597028;9596998	24	70	28	42	16	44	138	57	148	59	138	61	1.5895	3.87305	1.35082	2.4424	0.87618	2.47365	7.60191	2.62218	7.58112	3.066	7.03896	3.503	0.4104	0.553071	0.354205	2.89908	2.47264	2.00941	-2.48585	0.0123894	1	-	-	-	+	+	+	3' UTR	9606604	9608394	1791	-	413495	XM_396939.6
NC_037647.1	2548874	2549641	2548980;2549408;2549171;2549480;2549300	52	117	139	104	87	67	168	101	276	103	223	95	3.36974	6.4369	6.5212	5.964	4.53552	3.73796	9.24261	4.61142	14.0938	5.3144	11.3434	5.424	0.523504	1.09343	1.21337	2.00429	2.652	2.09133	-1.25343	0.0113881	1	-	-	-	+	+	+	Promoter (2-3kb)	2546343	2572211	25869	+	413510	XM_006559222.3
NC_037653.1	1139980	1140477	1140117;1140172;1140194	18	23	89	44	23	43	90	35	133	46	156	24	1.20802	1.3092	4.1922	2.556	1.23696	2.41868	4.97679	1.62756	6.81792	2.4017	7.95048	1.4125	0.922716	1.64014	0.511419	3.05782	2.83879	5.62866	-1.90648	0.0738896	1	-	-	-	+	+	+	Distal Intergenic	1144162	1146952	2791	+	413531	XM_026445864.1
NC_037653.1	1141143	1142038	1141463;1141878;1141460;1141438	15	58	96	82	41	71	104	76	278	66	383	70	1.01728	3.21845	4.51826	4.7144	2.16468	3.95784	5.74245	3.48117	14.1955	3.4237	19.4458	4.0115	0.316078	0.958396	0.546935	1.64957	4.14625	4.84751	-2.54682	0.0888131	1	-	-	-	+	+	+	Promoter (2-3kb)	1144162	1146952	2791	+	413531	XM_026445864.1
NC_037638.1	20476343	20478199	20476496;20476940;20477588;20477080;20477629;20477569	85	184	152	154	113	204	280	196	550	176	904	157	5.46788	10.0918	7.12674	8.804	5.87556	11.2689	15.3679	8.90637	28.0349	9.0447	45.8292	8.927	0.541814	0.809489	0.521396	1.7255	3.09959	5.13377	-2.41086	0.111325	1	-	-	-	+	+	+	Promoter (2-3kb)	20451866	20473760	21895	-	413575	XM_006571296.3
NC_037638.1	20465500	20467022	20465909;20466372;20465766;20466381;20466430	40	149	91	143	28	149	205	177	568	159	714	151	2.60678	8.1825	4.28536	8.1792	1.49466	8.2455	11.2661	8.04738	28.9507	8.176	36.2076	8.588	0.31858	0.523934	0.18127	1.39997	3.54094	4.21607	-3.16096	0.0836769	1	-	-	-	+	+	+	Intron (XM_006571296.3/413575, intron 1 of 5)	20451866	20473760	21895	-	413575	XM_006571296.3
NC_037645.1	33854	34181	34011;34046;34033	64	54	67	38	80	56	143	72	136	75	108	48	4.1327	3.00025	3.16744	2.2152	4.17474	3.13329	7.87536	3.30033	6.97056	3.8836	5.51976	2.7685	1.37745	1.42987	1.33238	2.38623	1.79487	1.99377	-0.576884	0.0563664	1	-	-	-	+	+	+	Intron (XM_026442024.1/413616, intron 4 of 14)	13185	17389	4205	-	413616	XM_026442028.1
NC_037651.1	2464942	2465746	2465340;2465342;2465362	32	74	75	67	65	86	107	87	856	79	812	63	2.09814	4.09125	3.54008	3.8624	3.40164	4.78239	5.90652	3.97848	43.6042	4.088	41.1703	3.616	0.512836	0.916549	0.711285	1.48462	10.6664	11.3856	-3.45877	0.154496	1	-	-	-	+	+	+	Promoter (<=1kb)	2460837	2465574	4738	-	413623	XM_016916405.2
NC_037638.1	15647879	15648712	15648252;15648325;15648374	60	60	103	77	53	69	165	81	672	59	864	46	3.87838	3.32755	4.84432	4.4304	2.78316	3.8479	9.07854	3.70722	34.2422	3.066	43.8036	2.6555	1.16554	1.09343	0.723293	2.44888	11.1684	16.4954	-3.33589	0.157672	1	-	-	-	+	+	+	Promoter (<=1kb)	15644332	15647509	3178	-	413672	XM_397113.7
NC_037638.1	15657750	15658398	15658056;15658051;15658088	48	33	83	72	56	53	91	82	312	68	391	58	3.11542	1.8547	3.91272	4.1464	2.93778	2.96838	5.03148	3.75243	15.9254	3.5259	19.8509	3.3335	1.67974	0.943643	0.989691	1.34086	4.51669	5.95497	-1.70902	0.17955	1	-	-	-	+	+	+	Promoter (<=1kb)	15656430	15658246	1817	-	413674	XM_003251575.4
NC_037638.1	11977921	11978438	11978170;11978217;11978238	16	56	49	44	13	42	93	54	157	49	223	33	1.08086	3.10935	2.329	2.556	0.72156	2.36371	5.14086	2.48655	8.03904	2.555	11.3434	1.921	0.347616	0.911189	0.305266	2.06747	3.1464	5.90495	-2.82962	0.104247	1	-	-	-	+	+	+	Promoter (2-3kb)	11977495	11980637	3143	-	413678	XM_016912301.2
NC_037638.1	11976001	11976966	11976132;11976641;11976656;11976707	17	52	55	86	31	74	99	73	211	69	313	64	1.14444	2.89115	2.60848	4.9416	1.64928	4.12275	5.469	3.34554	10.7866	3.577	15.901	3.6725	0.395842	0.527861	0.400044	1.63471	3.01554	4.32975	-2.76209	0.0812666	1	-	-	-	+	+	+	Downstream (<1kb)	11977495	11980637	3143	-	413678	XM_016912301.2
NC_037647.1	4944204	4945531	4944411;4945039;4944837;4945207;4945179	29	104	148	133	27	134	121	124	404	134	591	99	1.9074	5.72775	6.94042	7.6112	1.44312	7.42095	6.67218	5.65125	20.6064	6.8985	29.9789	5.65	0.33301	0.911869	0.194466	1.18066	2.98708	5.306	-2.71852	0.150038	1	-	-	-	+	+	+	Promoter (<=1kb)	4944746	4949670	4925	+	413749	XM_026443193.1
NC_037643.1	4128353	4129067	4128660;4128776;4128744;4128687	13	93	94	95	24	82	160	126	329	91	339	76	0.89012	5.1277	4.4251	5.4528	1.2885	4.56251	8.80509	5.74167	16.7904	4.7012	17.2176	4.3505	0.17359	0.811528	0.28241	1.53354	3.57151	3.95761	-2.83792	0.0661657	1	-	-	-	+	+	+	Intron (XM_026441387.1/413785, intron 1 of 3)	4124410	4225836	101427	+	413785	XM_026441388.1
NC_037640.1	10714213	10714736	10714337;10714427;10714479	38	60	80	41	20	45	102	41	158	61	123	32	2.47962	3.32755	3.77298	2.3856	1.08234	2.52862	5.63307	1.89882	8.08992	3.1682	6.27936	1.8645	0.745179	1.58156	0.428036	2.96662	2.55348	3.36785	-1.68991	0.010939	1	-	-	-	+	+	+	Intron (XM_003251110.4/413791, intron 1 of 10)	10683575	10723065	39491	-	413791	XM_003251110.4
NC_037645.1	1875650	1876086	1875888;1875874;1875902	7	84	21	52	2	71	73	47	143	47	121	50	0.50864	4.63675	1.02476	3.0104	0.15462	3.95784	4.04706	2.17008	7.32672	2.4528	6.17808	2.8815	0.109698	0.340407	0.0390668	1.86494	2.98708	2.14405	-3.83813	0.0177875	1	-	-	-	+	+	+	Intron (XM_016913585.2/413946, intron 2 of 8)	1870080	1884516	14437	+	413946	XM_006558878.3
NC_037640.1	3789617	3790326	3790079;3789948;3790032	13	103	88	90	19	87	110	100	239	108	179	83	0.89012	5.6732	4.14562	5.1688	1.0308	4.83736	6.07059	4.56621	12.2112	5.5699	9.1152	4.746	0.156899	0.802047	0.213091	1.32946	2.19236	1.92061	-2.21523	0.0134126	1	-	-	-	+	+	+	Intron (XM_006559760.3/413987, intron 1 of 7)	3770421	3797939	27519	-	413987	XM_006559760.3
NC_037643.1	1921520	1922221	1921672;1921675;1921802;1922058	26	81	123	84	28	74	177	113	176	74	179	91	1.71666	4.4731	5.77592	4.828	1.49466	4.12275	9.73482	5.15394	9.00576	3.8325	9.1152	5.198	0.383774	1.19634	0.36254	1.88881	2.34984	1.7536	-1.62507	0.0197765	1	-	-	-	+	+	+	Promoter (2-3kb)	1919282	1967171	47890	+	413998	XM_026441167.1
NC_037638.1	6389945	6390485	6390258;6390282;6390309	63	47	97	65	71	58	116	83	161	62	161	64	4.06912	2.6184	4.56484	3.7488	3.71088	3.24323	6.39873	3.79764	8.24256	3.2193	8.20368	3.6725	1.55405	1.21768	1.14419	1.68492	2.56036	2.23381	-0.72644	0.0596935	1	-	-	-	+	+	+	Intron (XM_006563235.3/414022, intron 2 of 7)	6386706	6406227	19522	+	414022	XM_006563236.3
NC_037642.1	12775820	12778392	12776197;12776732;12777368;12777851;12776697;12777324;12777746;12778165;12777361	74	167	164	180	172	179	168	220	834	191	1121	184	4.7685	9.1644	7.6857	10.2808	8.91642	9.8946	9.24261	9.99141	42.4848	9.8112	56.8181	10.4525	0.520329	0.747578	0.90114	0.925056	4.33023	5.43584	-2.30128	0.170632	1	-	-	-	+	+	+	Promoter (<=1kb)	12770336	12774960	4625	-	544670	XM_006569890.3
NC_037641.1	12593302	12595428	12593603;12593896;12594284;12594554;12595194;12593571;12593906;12594622	34	145	134	173	52	206	141	223	375	171	750	183	2.2253	7.9643	6.2883	9.8832	2.73162	11.3788	7.76598	10.127	19.1309	8.7892	38.0306	10.396	0.279409	0.636262	0.240062	0.766859	2.17664	3.6582	-2.51403	0.158926	1	-	-	-	+	+	+	Promoter (<=1kb)	12583497	12592860	9364	-	550918	XM_623406.6
NC_037642.1	4221397	4221969	4221611;4221680;4221661	10	58	83	67	13	43	104	87	247	81	212	79	0.69938	3.21845	3.91272	3.8624	0.72156	2.41868	5.74245	3.97848	12.6182	4.1902	10.7863	4.52	0.217303	1.01303	0.298328	1.44338	3.01136	2.38635	-2.16196	0.0399859	1	-	-	-	+	+	+	Promoter (<=1kb)	4218464	4221938	3475	-	550965	XM_623359.6
NC_037652.1	1417304	1418215	1417964;1417956;1418000	26	60	123	76	64	73	166	83	203	49	274	94	1.71666	3.32755	5.77592	4.3736	3.3501	4.06778	9.13323	3.79764	10.3795	2.555	13.926	5.3675	0.515893	1.32063	0.82357	2.40498	4.06243	2.5945	-1.76834	0.0386973	1	-	-	-	+	+	+	Intron (XM_006557581.3/412453, intron 2 of 7)	1370111	1414274	44164	-	551005	XM_006557582.3
NC_037640.1	12053805	12054457	12053905;12054230;12054300	78	94	132	82	86	66	160	120	138	83	142	71	5.02282	5.18225	6.19514	4.7144	4.48398	3.68299	8.80509	5.47041	7.07232	4.2924	7.24152	4.068	0.969235	1.31409	1.21748	1.60959	1.64764	1.78012	-0.524974	0.0217862	1	-	-	-	+	+	+	Intron (XM_026439425.1/410918, intron 3 of 3)	12073019	12075755	2737	+	551124	XM_006568467.3
NC_037648.1	6878224	6879090	6878705;6878684;6878712	30	82	78	64	24	76	104	95	549	89	543	81	1.97098	4.52765	3.67982	3.692	1.2885	4.23269	5.74245	4.34016	27.984	4.599	27.5482	4.633	0.435321	0.996701	0.304416	1.3231	6.0848	5.94608	-2.94307	0.129272	1	-	-	-	+	+	+	Promoter (<=1kb)	6878324	6883950	5627	+	551140	XM_623536.6
NC_037638.1	8192287	8193237	8192466;8192809;8192771;8192612	11	120	86	108	30	91	175	169	336	114	305	148	0.76296	6.60055	4.05246	6.1912	1.59774	5.05724	9.62544	7.6857	17.1466	5.8765	15.4958	8.4185	0.11559	0.654552	0.315931	1.25238	2.91783	1.84068	-2.46846	0.0664076	1	-	-	-	+	+	+	3' UTR	8185776	8188764	2989	-	551241	XM_006565307.3
NC_037638.1	8191252	8191596	8191428;8191388;8191435	10	55	43	51	7	58	86	40	110	51	104	51	0.69938	3.0548	2.04952	2.9536	0.41232	3.24323	4.75803	1.85361	5.64768	2.6572	5.3172	2.938	0.228945	0.693906	0.127133	2.5669	2.12543	1.8098	-2.63055	0.00346545	1	-	-	-	+	+	+	Promoter (2-3kb)	8185776	8188764	2989	-	551241	XM_006565307.3
NC_037639.1	3043213	3043890	3043336;3043579;3043772	4	102	59	108	10	87	116	97	176	101	131	83	0.3179	5.61865	2.7948	6.1912	0.56694	4.83736	6.39873	4.43058	9.00576	5.2122	6.68448	4.746	0.0565794	0.451415	0.1172	1.44422	1.72782	1.40845	-2.87312	0.0013493	1	-	-	-	+	+	+	Intron (XM_006558762.3/102655706, intron 5 of 6)	3021268	3024058	2791	+	551255	XM_623646.6
NC_037639.1	3122194	3123276	3122787;3122783;3122615	56	141	113	121	62	110	437	134	394	117	561	126	3.62406	7.7461	5.31012	6.9296	3.24702	6.10167	23.9542	6.10335	20.0976	6.0298	28.4597	7.1755	0.467856	0.766295	0.532153	3.92476	3.33305	3.96623	-2.66779	0.00119056	1	-	-	-	+	+	+	Intron (XM_006558762.3/102655706, intron 4 of 6)	3021268	3024058	2791	+	551255	XM_623646.6
NC_037650.1	10356388	10356897	10356607;10356616;10356758	27	58	97	89	45	83	198	54	151	81	107	52	1.78024	3.21845	4.56484	5.112	2.37084	4.61748	10.8833	2.48655	7.73376	4.1902	5.46912	2.9945	0.553136	0.892966	0.513449	4.37687	1.84568	1.82639	-2.03828	0.136119	1	-	-	-	+	+	+	Promoter (1-2kb)	10354652	10416646	61995	+	551272	XM_026444820.1
NC_037651.1	8221108	8222271	8221781;8221898;8221723	28	145	162	113	39	106	165	163	779	157	666	105	1.84382	7.9643	7.59254	6.4752	2.0616	5.88179	9.07854	7.41444	39.6864	8.0738	33.7769	5.989	0.231511	1.17256	0.350506	1.22444	4.91545	5.63982	-2.74711	0.128696	1	-	-	-	+	+	+	Promoter (<=1kb)	8220358	8224718	4361	+	551344	XM_026445083.1
NC_037649.1	3915834	3916305	3916000;3916061;3916047	8	50	85	32	28	36	139	66	172	53	158	32	0.57222	2.78205	4.00588	1.8744	1.49466	2.03389	7.6566	3.02907	8.80224	2.7594	8.05176	1.8645	0.205683	2.13715	0.734878	2.52771	3.18991	4.31846	-1.70526	0.0411763	1	-	-	-	+	+	+	Promoter (1-2kb)	3917413	3919028	1616	+	551350	XM_623747.5
NC_037638.1	18303807	18304511	18304215;18304272;18304225	33	71	102	68	48	97	130	73	293	77	303	75	2.16172	3.9276	4.79774	3.9192	2.52546	5.38706	7.16439	3.34554	14.9587	3.9858	15.3946	4.294	0.550392	1.22416	0.468801	2.14147	3.753	3.58514	-2.07917	0.0263552	1	-	-	-	+	+	+	Intron (XM_026446139.1/551356, intron 1 of 36)	18300271	18408957	108687	+	551356	XM_026446136.1
NC_037648.1	2906359	2907999	2906919;2907291;2906915;2907276;2906935;2907859	46	146	116	150	78	120	165	182	969	149	1045	134	2.98826	8.01885	5.44986	8.5768	4.07166	6.65137	9.07854	8.27343	49.3536	7.665	52.9694	7.6275	0.372654	0.635419	0.612154	1.09731	6.43883	6.94453	-3.15986	0.148713	1	-	-	-	+	+	+	Promoter (<=1kb)	2906767	2911928	5162	+	551391	XM_006559012.3
NC_037645.1	6599820	6603823	6599940;6600528;6601294;6601783;6602546;6603338;6599987;6600528;6601258;6601255;6602605;6603340;6603626	57	513	346	393	143	429	310	414	1260	416	1651	349	3.68764	28.0387	16.1633	22.3792	7.42176	23.6371	17.0086	18.7621	64.1597	21.3087	83.6573	19.775	0.13152	0.722247	0.313988	0.90654	3.01096	4.23046	-2.8027	0.134665	1	-	-	-	+	+	+	Promoter (<=1kb)	6600256	6604615	4360	-	551401	XM_006563787.3
NC_037640.1	3293822	3294655	3293971;3294350;3294343;3294388;3294615	70	105	118	104	75	80	182	78	206	98	244	91	4.51418	5.7823	5.54302	5.964	3.91704	4.45257	10.0083	3.57159	10.5322	5.0589	12.4068	5.198	0.780689	0.929413	0.879726	2.8022	2.08192	2.38684	-1.48929	0.0143717	1	-	-	-	+	+	+	Promoter (<=1kb)	3288118	3295009	6892	-	551458	XM_623850.6
NC_037648.1	6985943	6986550	6986156;6986122;6986145	13	44	99	42	13	59	79	56	105	53	213	74	0.89012	2.45475	4.658	2.4424	0.72156	3.2982	4.3752	2.57697	5.39328	2.7594	10.837	4.2375	0.362611	1.90714	0.218774	1.69781	1.95451	2.5574	-1.31924	0.134347	1	-	-	-	+	+	+	3' UTR	6994683	6998649	3967	-	551483	XM_006572181.3
NC_037647.1	8076103	8077243	8076525;8077049;8076482;8076979;8076516	58	82	128	105	59	100	139	111	985	96	1108	69	3.75122	4.52765	6.00882	6.0208	3.0924	5.55197	7.6566	5.06352	50.1677	4.9567	56.1598	3.955	0.828514	0.99801	0.556991	1.51211	10.1212	14.1997	-3.43805	0.171619	1	-	-	-	+	+	+	Promoter (<=1kb)	8076123	8077295	1173	+	551516	XM_623911.6
NC_037646.1	1574338	1575952	1574742;1575061;1575720;1574714;1575057;1574775;1575702	70	93	98	119	121	154	127	169	862	120	1069	114	4.51418	5.1277	4.61142	6.816	6.28788	8.52035	7.00032	7.6857	43.9094	6.1831	54.1848	6.4975	0.880352	0.676558	0.737984	0.910824	7.10152	8.33933	-2.83294	0.178195	1	-	-	-	+	+	+	Promoter (<=1kb)	1574656	1577281	2626	+	551554	XM_623948.6
NC_037638.1	21480565	21481006	21480773;21480812;21480852	23	54	108	41	21	49	99	59	129	39	135	42	1.52592	3.00025	5.07722	2.3856	1.13388	2.7485	5.469	2.7126	6.6144	2.044	6.88704	2.4295	0.508598	2.12828	0.412545	2.01615	3.23601	2.83476	-1.40705	0.0748251	1	-	-	-	+	+	+	Exon (XR_003304117.1/107966061, exon 3 of 3)	21485258	21486824	1567	-	551584	XM_623976.5
NC_037638.1	14295270	14296714	14295465;14295568;14296133;14295604;14296616	28	224	239	141	48	203	295	193	357	163	358	183	1.84382	12.2737	11.1792	8.0656	2.52546	11.2139	16.1882	8.77074	18.215	8.3804	18.1798	10.396	0.150225	1.38603	0.225208	1.84571	2.17352	1.74873	-1.71128	0.067621	1	-	-	-	+	+	+	Promoter (<=1kb)	14292090	14296201	4112	-	551643	XM_006570581.3
NC_037638.1	19312597	19313308	19313001;19313016;19313031	22	70	80	57	40	57	121	99	573	78	642	56	1.46234	3.87305	3.77298	3.2944	2.11314	3.18826	6.67218	4.521	29.2051	4.0369	32.5615	3.2205	0.377568	1.14527	0.662788	1.47582	7.23454	10.1107	-3.10623	0.15958	1	-	-	-	+	+	+	Promoter (<=1kb)	19297850	19313191	15342	-	551731	XR_003305271.1
NC_037643.1	10850819	10851261	10851024;10850985;10851006	6	62	33	50	6	55	91	64	113	63	124	37	0.44506	3.43665	1.58372	2.8968	0.36078	3.07832	5.03148	2.93865	5.80032	3.2704	6.33	2.147	0.129504	0.546714	0.1172	1.71217	1.77358	2.9483	-3.01958	0.0316498	1	-	-	-	+	+	+	Exon (XM_006568240.3/551749, exon 7 of 12)	10849421	10854954	5534	-	551749	XM_006568240.3
NC_037653.1	4612872	4613296	4612928;4613185;4613162	19	61	88	51	35	50	120	73	123	76	105	53	1.2716	3.3821	4.14562	2.9536	1.85544	2.80347	6.61749	3.34554	6.30912	3.9347	5.36784	3.051	0.375979	1.40358	0.661837	1.978	1.60346	1.75937	-1.12936	0.0740302	1	-	-	-	+	+	+	Promoter (1-2kb)	4611521	4633560	22040	+	551799	XR_001705880.2
NC_037642.1	5288123	5288895	5288242;5288638;5288623;5288663	58	85	118	73	95	108	103	98	197	68	189	79	3.75122	4.6913	5.54302	4.2032	4.94784	5.99173	5.68776	4.47579	10.0742	3.5259	9.6216	4.52	0.799612	1.31876	0.825778	1.27078	2.8572	2.12867	-1.08754	0.125168	1	-	-	-	+	+	+	Promoter (<=1kb)	5288916	5297530	8615	+	551802	XM_016912466.2
NC_037645.1	3847219	3849190	3847722;3848327;3847620;3848330;3848670;3848523	77	244	229	276	110	210	208	210	967	238	1256	152	4.95924	13.3648	10.7134	15.7336	5.72094	11.5987	11.4302	9.53931	49.2518	12.2129	63.6545	8.6445	0.371067	0.680925	0.49324	1.19822	4.03277	7.36358	-3.02691	0.174348	1	-	-	-	+	+	+	Promoter (<=1kb)	3845498	3847982	2485	-	551834	XM_006559650.3
NC_037653.1	3063896	3064496	3064058;3064068;3064114	39	92	96	65	36	63	112	65	193	59	182	65	2.5432	5.07315	4.51826	3.7488	1.90698	3.51808	6.17997	2.98386	9.87072	3.066	9.26712	3.729	0.501306	1.20526	0.542051	2.07113	3.21941	2.48515	-1.78994	0.0140593	1	-	-	-	+	+	+	Intron (XM_026445713.1/551848, intron 1 of 13)	3060192	3082831	22640	+	551848	XM_006559381.3
NC_037638.1	4573535	4573909	4573698;4573731;4573723	7	32	50	32	14	36	90	38	127	12	116	45	0.50864	1.80015	2.37558	1.8744	0.7731	2.03389	4.97679	1.76319	6.51264	0.6643	5.92488	2.599	0.282554	1.26738	0.380109	2.82261	9.80376	2.27968	-2.94919	0.214553	1	-	-	-	+	+	+	Promoter (1-2kb)	4572274	4576709	4436	+	551892	XM_006561928.3
NC_037638.1	21731903	21733377	21732496;21733071;21732361;21733063;21733064	56	88	109	87	78	108	133	126	531	115	748	80	3.62406	4.85495	5.1238	4.9984	4.07166	5.99173	7.32846	5.74167	27.0682	5.9276	37.9294	4.5765	0.746467	1.02509	0.679547	1.27636	4.56647	8.28786	-2.52733	0.194201	1	-	-	-	+	+	+	Promoter (<=1kb)	21731326	21732659	1334	-	551912	XM_016914414.2
NC_037646.1	12290846	12291198	12290982;12291035;12291036	3	30	44	26	9	36	89	28	73	24	120	27	0.25432	1.69105	2.0961	1.5336	0.5154	2.03389	4.9221	1.31109	3.76512	1.2775	6.12744	1.582	0.150392	1.36678	0.253406	3.7542	2.94726	3.87322	-2.57832	0.0048522	1	-	-	-	+	+	+	Intron (XM_006567350.3/551930, intron 1 of 4)	12286925	12294665	7741	-	551930	XM_006567350.3
NC_037642.1	2865597	2867420	2866020;2866963;2866010;2866006;2867007	71	177	338	150	119	203	307	190	1481	176	1574	192	4.57776	9.7099	15.7906	8.5768	6.1848	11.2139	16.8445	8.63511	75.4042	9.0447	79.758	10.9045	0.471453	1.84108	0.55153	1.9507	8.33684	7.31423	-2.61958	0.125118	1	-	-	-	+	+	+	Promoter (<=1kb)	2865796	2868847	3052	+	551982	XM_006559794.3
NC_037652.1	1973114	1973979	1973259;1973726;1973718;1973792	36	37	118	76	55	85	132	111	305	65	361	48	2.35246	2.0729	5.54302	4.3736	2.88624	4.72742	7.27377	5.06352	15.5693	3.3726	18.3317	2.7685	1.13486	1.26738	0.610532	1.4365	4.61641	6.62153	-2.07276	0.16437	1	-	-	-	+	+	+	Promoter (<=1kb)	1967364	1973910	6547	-	551984	XM_624367.5
NC_037645.1	7758309	7759758	7758455;7759042;7759741;7758881;7758873	38	116	108	105	81	168	112	145	410	133	640	128	2.47962	6.38235	5.07722	6.0208	4.22628	9.28993	6.17997	6.60066	20.9117	6.8474	32.4602	7.2885	0.388512	0.84328	0.454931	0.936265	3.05396	4.45362	-2.32368	0.156098	1	-	-	-	+	+	+	Promoter (<=1kb)	7757185	7759223	2039	-	552003	XM_006564563.2
NC_037652.1	3218943	3219455	3219157;3219200;3219253	15	69	90	61	47	50	144	97	218	57	211	94	1.01728	3.8185	4.23878	3.5216	2.47392	2.80347	7.93005	4.43058	11.1427	2.9638	10.7357	5.3675	0.266408	1.20365	0.882449	1.78984	3.7596	2.00013	-1.68219	0.0924555	1	-	-	-	+	+	+	Intron (XM_624478.6/552099, intron 1 of 2)	3181720	3229507	47788	-	552099	XM_624478.6
NC_037653.1	5263677	5264139	5263836;5263892;5264006	12	39	55	50	15	54	95	76	128	54	116	35	0.82654	2.182	2.60848	2.8968	0.82464	3.02335	5.25024	3.48117	6.56352	2.8105	5.92488	2.034	0.378799	0.900469	0.272757	1.50818	2.33536	2.91292	-2.12211	0.0337876	1	-	-	-	+	+	+	Promoter (<=1kb)	5245630	5263991	18362	-	552113	XM_026445768.1
NC_037649.1	7944637	7945386	7945067;7945105;7945207	37	57	107	93	61	96	152	111	148	79	228	79	2.41604	3.1639	5.03064	5.3392	3.19548	5.33209	8.36757	5.06352	7.58112	4.088	11.5966	4.52	0.763627	0.942209	0.599292	1.65252	1.85448	2.56562	-1.39747	0.0335939	1	-	-	-	+	+	+	3' UTR	7947460	7951157	3698	-	552178	XM_006565193.3
NC_037646.1	6515998	6516420	6516154;6516181;6516199	0	29	40	33	7	44	105	51	111	30	95	28	0.06358	1.6365	1.90978	1.9312	0.41232	2.47365	5.79714	2.35092	5.69856	1.5841	4.86144	1.6385	0.0388512	0.988908	0.166685	2.4659	3.59735	2.96701	-2.91843	0.00423721	1	-	-	-	+	+	+	Promoter (1-2kb)	6514532	6518160	3629	+	552217	XM_016913951.2
NC_037646.1	6516573	6517052	6516851;6516731;6516889;6516860	11	65	44	49	3	67	130	91	143	74	133	58	0.76296	3.6003	2.0961	2.84	0.20616	3.73796	7.16439	4.15932	7.32672	3.8325	6.78576	3.3335	0.211916	0.738063	0.0551531	1.72249	1.91173	2.03563	-2.49593	0.00825165	1	-	-	-	+	+	+	Promoter (2-3kb)	6514532	6518160	3629	+	552217	XM_016913951.2
NC_037651.1	5451814	5452526	5451881;5452233;5452381;5452422	75	66	97	74	68	75	96	101	120	59	142	62	4.83208	3.65485	4.56484	4.26	3.55626	4.17772	5.30493	4.61142	6.15648	3.066	7.24152	3.5595	1.3221	1.07156	0.851244	1.15039	2.00798	2.03442	-0.678336	0.141224	1	-	-	-	+	+	+	Promoter (1-2kb)	5450495	5465164	14670	+	552261	XM_624637.6
NC_037647.1	10098181	10099788	10098294;10099002;10099662;10098970;10098947	71	169	179	141	104	165	153	227	1052	122	1235	140	4.57776	9.2735	8.3844	8.0656	5.4117	9.12502	8.42226	10.3079	53.5766	6.2853	62.591	7.9665	0.493639	1.03953	0.593062	0.817068	8.52411	7.85678	-3.01587	0.177898	1	-	-	-	+	+	+	Promoter (<=1kb)	10099124	10101965	2842	+	552275	XM_006566104.3
NC_037649.1	7871260	7873325	7871513;7871719;7871970;7872656;7872681;7872660	80	108	138	158	112	147	201	199	916	130	1459	100	5.14998	5.94595	6.47462	9.0312	5.82402	8.13556	11.0474	9.042	46.657	6.6941	73.9344	5.7065	0.866132	0.716917	0.715872	1.22179	6.96987	12.9562	-3.20148	0.20478	1	-	-	-	+	+	+	Promoter (<=1kb)	7849643	7872822	23180	-	552286	XM_006565175.3
NC_037638.1	6039646	6040155	6039881;6039879;6039867	7	46	85	27	16	37	102	31	269	42	232	35	0.50864	2.56385	4.00588	1.5904	0.87618	2.08886	5.63307	1.44672	13.7376	2.1973	11.7991	2.034	0.198389	2.51879	0.419454	3.89368	6.25204	5.80093	-2.34597	0.014512	1	-	-	-	+	+	+	Promoter (<=1kb)	6031514	6040126	8613	-	552294	XM_006563251.2
NC_037645.1	2635904	2636268	2636089;2636097;2636122	13	30	92	50	9	45	97	60	81	41	120	32	0.89012	1.69105	4.33194	2.8968	0.5154	2.52862	5.35962	2.75781	4.17216	2.1462	6.12744	1.8645	0.526371	1.49542	0.203827	1.94343	1.94398	3.28637	-1.68853	0.0507236	1	-	-	-	+	+	+	Promoter (1-2kb)	2637692	2670864	33173	+	552358	XM_026442436.1
NC_037639.1	10190012	10190797	10190407;10190419;10190386	50	60	73	65	76	89	182	60	887	53	1011	63	3.24258	3.32755	3.44692	3.7488	3.96858	4.9473	10.0083	2.75781	45.1814	2.7594	51.2477	3.616	0.974465	0.919473	0.802171	3.62908	16.3736	14.1725	-3.664	0.11643	1	-	-	-	+	+	+	Promoter (<=1kb)	10190225	10193905	3681	+	552365	XM_003250732.4
NC_037648.1	12920382	12921623	12920588;12920918;12921270;12921559;12920576;12921275;12921338	58	125	147	124	111	172	299	166	390	147	352	112	3.75122	6.8733	6.89384	7.1	5.77248	9.50981	16.407	7.55007	19.8941	7.5628	17.8759	6.3845	0.545767	0.970963	0.607003	2.17309	2.63052	2.79989	-1.84006	0.00206143	1	-	-	-	+	+	+	Promoter (2-3kb)	12918286	12922857	4572	+	552447	XM_624820.6
NC_037648.1	972269	972754	972442;972395;972471	51	101	113	74	60	66	133	86	178	65	134	67	3.30616	5.5641	5.31012	4.26	3.14394	3.68299	7.32846	3.93327	9.10752	3.3726	6.8364	3.842	0.594195	1.24651	0.853638	1.8632	2.70044	1.77939	-1.23524	0.0327149	1	-	-	-	+	+	+	Intron (XM_016914971.2/100578739, intron 2 of 4)	948616	964578	15963	-	552468	XM_026443909.1
NC_037644.1	8658153	8658738	8658377;8658451;8658319	29	56	142	76	29	54	95	68	168	59	207	41	1.9074	3.10935	6.66094	4.3736	1.5462	3.02335	5.25024	3.11949	8.59872	3.066	10.5331	2.373	0.61344	1.52299	0.511419	1.68304	2.80454	4.43873	-1.75324	0.105631	1	-	-	-	+	+	+	Distal Intergenic	8662237	8663478	1242	+	552509	XM_006564270.3
NC_037640.1	4476147	4477214	4476730;4476692;4476684	31	60	118	60	66	76	104	100	348	65	514	52	2.03456	3.32755	5.54302	3.4648	3.45318	4.23269	5.74245	4.56621	17.7571	3.3726	26.0796	2.9945	0.611429	1.59981	0.815836	1.2576	5.26511	8.70917	-2.3311	0.197415	1	-	-	-	+	+	+	Promoter (<=1kb)	4477094	4479450	2357	+	552629	XM_006559699.3
NC_037640.1	4338959	4339805	4339332;4339360;4339406	37	42	73	47	76	41	90	59	309	42	590	49	2.41604	2.34565	3.44692	2.7264	3.96858	2.30874	4.97679	2.7126	15.7728	2.1973	29.9282	2.825	1.03001	1.26428	1.71894	1.83469	7.17826	10.5941	-2.28854	0.177517	1	-	-	-	+	+	+	Downstream (2-3kb)	4331019	4335835	4817	+	552647	XM_026439513.1
NC_037653.1	1309100	1310836	1309341;1309770;1310248;1310558;1310291;1310288	20	106	97	142	33	137	173	152	424	133	615	136	1.33518	5.83685	4.56484	8.1224	1.75236	7.58586	9.51606	6.91713	21.624	6.8474	31.1942	7.7405	0.22875	0.562006	0.231003	1.37572	3.15799	4.03	-3.06718	0.0816772	1	-	-	-	+	+	+	Promoter (2-3kb)	1306240	1310425	4186	+	552675	XM_006557734.3
NC_037642.1	10895277	10896738	10895523;10896341;10895432;10896315;10896364	40	114	62	121	20	128	111	117	356	138	539	121	2.60678	6.27325	2.93454	6.9296	1.08234	7.09113	6.12528	5.33478	18.1642	7.1029	27.3456	6.893	0.415539	0.423479	0.152633	1.14818	2.55729	3.96716	-2.95182	0.109917	1	-	-	-	+	+	+	Promoter (2-3kb)	10893192	10904379	11188	+	552679	XM_016912202.2
NC_037642.1	12708259	12709395	12708437;12709051;12709050;12709020	41	67	113	63	73	85	139	109	575	71	671	66	2.67036	3.7094	5.31012	3.6352	3.81396	4.72742	7.6566	4.9731	29.3069	3.6792	34.0301	3.7855	0.71989	1.46075	0.806774	1.5396	7.96556	8.98959	-2.63015	0.155628	1	-	-	-	+	+	+	Promoter (<=1kb)	12708838	12711035	2198	+	552696	XM_006569930.3
NC_037645.1	10039669	10040127	10039802;10039936;10039896	50	51	72	60	81	63	143	74	132	84	112	49	3.24258	2.8366	3.40034	3.4648	4.22628	3.51808	7.87536	3.39075	6.76704	4.3435	5.72232	2.825	1.14312	0.981396	1.2013	2.3226	1.55797	2.0256	-0.828513	0.0511584	1	-	-	-	+	+	+	Intron (XM_026442196.1/552709, intron 1 of 14)	10012556	10412613	400058	+	552709	XM_026442195.1
NC_037638.1	14136677	14139007	14137109;14137804;14138441;14136978;14137786;14138455;14137738	81	141	142	140	94	200	158	187	1006	173	1312	198	5.21356	7.7461	6.66094	8.0088	4.8963	11.049	8.69571	8.49948	51.2362	8.8914	66.4903	11.2435	0.673056	0.831703	0.443144	1.02309	5.76244	5.91367	-2.70474	0.154635	1	-	-	-	+	+	+	Promoter (<=1kb)	14136340	14137355	1016	-	552719	XM_006572290.3
NC_037642.1	9839522	9842389	9839724;9840453;9841531;9842169;9840440;9841496;9841535	72	235	165	247	121	271	221	284	1238	255	1755	220	4.64134	12.8738	7.73228	14.0864	6.28788	14.9518	12.1412	12.8849	63.0403	13.0816	88.9238	12.4865	0.360526	0.548918	0.420543	0.942281	4.81901	7.1216	-3.27597	0.166087	1	-	-	-	+	+	+	Promoter (<=1kb)	9838677	9839814	1138	-	552780	XM_625155.5
NC_037652.1	6847059	6847612	6847179;6847312;6847280	51	82	153	72	50	83	137	96	184	73	170	84	3.30616	4.52765	7.17332	4.1464	2.62854	4.61748	7.54722	4.38537	9.4128	3.7814	8.65944	4.8025	0.730215	1.73001	0.569259	1.721	2.48924	1.80311	-0.989095	0.0948396	1	-	-	-	+	+	+	Distal Intergenic	6603005	6841964	238960	-	552844	XM_625220.6
NC_037652.1	1920977	1921882	1921348;1921294;1921294	33	49	150	88	83	72	167	97	266	67	528	65	2.16172	2.7275	7.03358	5.0552	4.32936	4.01281	9.18792	4.43058	13.585	3.4748	26.7886	3.729	0.792565	1.39136	1.07888	2.07375	3.90958	7.18386	-2.01276	0.156115	1	-	-	-	+	+	+	Promoter (2-3kb)	1924191	1926002	1812	+	677673	NM_001040223.1
NC_037652.1	1354825	1355364	1355126;1355112;1355085	18	84	70	89	9	81	90	86	178	88	147	83	1.20802	4.63675	3.30718	5.112	0.5154	4.50754	4.97679	3.93327	9.10752	4.5479	7.49472	4.746	0.260532	0.646944	0.114342	1.26531	2.00258	1.57917	-2.24597	0.0105959	1	-	-	-	+	+	+	Intron (XM_026445283.1/724047, intron 2 of 8)	957811	1358449	400639	-	724047	NM_001042458.1
NC_037651.1	4951065	4951472	4951285;4951248;4951343	20	47	74	25	18	30	83	46	113	57	96	49	1.33518	2.6184	3.4935	1.4768	0.97926	1.70407	4.59396	2.12487	5.80032	2.9638	4.91208	2.825	0.509922	2.36559	0.574659	2.162	1.95706	1.73879	-0.763702	0.316648	1	-	-	-	+	+	+	Promoter (<=1kb)	4946894	4951372	4479	-	724121	XM_003249614.4
NC_037651.1	4952640	4953437	4952781;4953176;4953178;4953196	37	50	38	54	59	55	98	53	334	57	397	46	2.41604	2.78205	1.81662	3.124	3.0924	3.07832	5.41431	2.44134	17.0448	2.9638	20.1547	2.6555	0.868439	0.581504	1.00457	2.21776	5.751	7.58979	-2.6642	0.108386	1	-	-	-	+	+	+	Promoter (<=1kb)	4946899	4953417	6519	-	724121	XM_006560202.3
NC_037649.1	5229520	5231416	5229734;5230177;5230860;5231196;5229696;5230140;5231259	90	66	108	108	142	122	110	161	296	91	800	106	5.78578	3.65485	5.07722	6.1912	7.37022	6.76131	6.07059	7.32402	15.1114	4.7012	40.5626	6.0455	1.58304	0.82007	1.09006	0.82886	3.21437	6.70955	-1.6221	0.291351	1	-	-	-	+	+	+	Promoter (<=1kb)	5229118	5230423	1306	-	724142	XM_001119826.5
NC_037642.1	6850698	6851126	6850806;6850951;6850889;6850999	30	58	73	73	37	62	100	56	117	60	102	57	1.97098	3.21845	3.44692	4.2032	1.95852	3.46311	5.52369	2.57697	6.00384	3.1171	5.21592	3.277	0.6124	0.82007	0.565538	2.14348	1.9261	1.59168	-1.50256	0.0071275	1	-	-	-	+	+	+	Intron (XM_026441053.1/724169, intron 1 of 2)	6855315	6865775	10461	+	724169	XM_026441054.1
NC_037638.1	16664764	16668756	16665060;16665071;16665858;16666766;16667923;16668458;16665842;16666400;16666967;16666773;16667932;16668462;16667916	61	381	193	340	114	387	377	431	1712	382	2032	359	3.94196	20.8381	9.03652	19.3688	5.9271	21.3284	20.6728	19.5307	87.1574	19.5713	102.951	20.34	0.189171	0.46655	0.277897	1.05848	4.45333	5.0615	-3.50145	0.122481	1	-	-	-	+	+	+	Intron (XM_006570997.3/724237, intron 2 of 5)	16651286	16671767	20482	-	724237	XM_006570997.3
NC_037638.1	22724461	22725483	22724754;22725218;22724738;22725212;22725231	16	84	63	65	39	102	130	125	367	91	489	83	1.08086	4.63675	2.98112	3.7488	2.0616	5.66191	7.16439	5.69646	18.7238	4.7012	24.8136	4.746	0.233107	0.79522	0.364117	1.25769	3.98277	5.22832	-2.9104	0.120215	1	-	-	-	+	+	+	Exon (XM_001120032.5/724239, exon 6 of 8)	22720414	22725817	5404	+	724239	XM_001120032.5
NC_037648.1	2367212	2367712	2367482;2367471;2367489	21	40	83	28	48	37	259	45	179	39	195	46	1.39876	2.23655	3.91272	1.6472	2.52546	2.08886	14.2194	2.07966	9.1584	2.044	9.92544	2.6555	0.62541	2.37538	1.20901	6.83737	4.48063	3.73769	-1.83848	0.0405145	1	-	-	-	+	+	+	Intron (XM_003249382.4/724286, intron 1 of 4)	2360932	2372397	11466	+	724286	XM_006558950.3
NC_037644.1	8015375	8016334	8015482;8016016;8015591;8015987;8015935	26	150	153	118	47	118	286	148	359	131	320	107	1.71666	8.23705	7.17332	6.7592	2.47392	6.54143	15.696	6.73629	18.3168	6.7452	16.2554	6.102	0.208407	1.06127	0.378193	2.33007	2.71553	2.66395	-2.22605	0.00719748	1	-	-	-	+	+	+	Downstream (1-2kb)	8005369	8009486	4118	-	724312	XM_001120116.5
NC_037640.1	11381834	11383051	11381928;11382376;11382781;11382701	44	173	121	147	67	179	159	160	320	168	241	119	2.8611	9.4917	5.68276	8.4064	3.50472	9.8946	8.7504	7.27881	16.3325	8.6359	12.2549	6.78	0.301432	0.676004	0.354205	1.20217	1.89123	1.80751	-1.87985	0.0160664	1	-	-	-	+	+	+	Promoter (<=1kb)	11383792	11471418	87627	+	724344	XR_003304269.1
NC_037642.1	6879708	6880431	6879836;6879902;6880287	37	55	116	75	70	78	122	77	142	58	218	73	2.41604	3.0548	5.44986	4.3168	3.65934	4.34263	6.72687	3.52638	7.27584	3.0149	11.0902	4.181	0.7909	1.26248	0.842655	1.90759	2.41329	2.65252	-1.26779	0.00963034	1	-	-	-	+	+	+	Promoter (<=1kb)	6879277	6880564	1288	+	724386	XM_001120220.5
NC_037639.1	4831333	4832054	4831717;4831817;4831714	53	108	82	91	82	93	214	108	223	85	194	92	3.43332	5.94595	3.86614	5.2256	4.27782	5.16718	11.7584	4.92789	11.3971	4.3946	9.8748	5.2545	0.577422	0.739846	0.827883	2.38609	2.59343	1.8793	-1.67688	0.0109329	1	-	-	-	+	+	+	Promoter (<=1kb)	4831304	4832577	1274	+	724405	XM_003249641.4
NC_037652.1	5270929	5273053	5271168;5271800;5272429;5271370;5271761;5272447;5272877;5272369	50	264	251	253	66	260	216	284	635	295	786	205	3.24258	14.4558	11.7382	14.4272	3.45318	14.3472	11.8677	12.8849	32.3597	15.1256	39.8537	11.639	0.22431	0.813616	0.240687	0.921055	2.1394	3.42415	-2.34244	0.13026	1	-	-	-	+	+	+	Intron (XM_001120328.5/724466, intron 4 of 10)	5255226	5265494	10269	-	724421	XM_026445625.1
NC_037639.1	4833538	4834937	4833783;4834269;4833840;4834322;4833861	21	165	84	129	35	142	178	209	721	157	810	104	1.39876	9.0553	3.9593	7.384	1.85544	7.86071	9.78951	9.4941	36.7354	8.0738	41.069	5.9325	0.154469	0.5362	0.23604	1.03112	4.54995	6.92271	-3.75411	0.152232	1	-	-	-	+	+	+	Promoter (<=1kb)	4833936	4835076	1141	+	724449	XM_001120137.4
NC_037643.1	12125313	12125784	12125552;12125585;12125490	22	43	100	60	48	54	101	81	164	60	183	48	1.46234	2.4002	4.70458	3.4648	2.52546	3.02335	5.57838	3.70722	8.3952	3.1171	9.31776	2.7685	0.609258	1.35782	0.835318	1.50473	2.69327	3.36563	-1.43242	0.0844429	1	-	-	-	+	+	+	Intron (XM_026441514.1/410159, intron 1 of 16)	12112866	12118277	5412	-	724516	XM_001120390.5
NC_037638.1	15610083	15610475	15610290;15610315;15610329	29	57	94	43	26	45	93	62	104	44	122	50	1.9074	3.1639	4.4251	2.4992	1.39158	2.52862	5.14086	2.84823	5.3424	2.2995	6.22872	2.8815	0.602864	1.77061	0.550332	1.80493	2.32329	2.16162	-1.10518	0.0917528	1	-	-	-	+	+	+	Promoter (1-2kb)	15534940	15611808	76869	-	724539	XR_003306016.1
NC_037653.1	2472198	2473100	2472649;2472616;2472734	18	111	108	105	13	100	235	129	312	101	374	80	1.20802	6.1096	5.07722	6.0208	0.72156	5.55197	12.9068	5.8773	15.9254	5.2122	18.99	4.5765	0.197725	0.84328	0.129965	2.19604	3.05541	4.14946	-3.0051	0.0269261	1	-	-	-	+	+	+	Intron (XM_001120442.5/724552, intron 1 of 3)	2466367	2479648	13282	+	724552	XM_001120442.5
NC_037653.1	2474463	2474898	2474679;2474743;2474847	13	39	37	41	2	63	106	67	96	72	128	57	0.89012	2.182	1.77004	2.3856	0.15462	3.51808	5.85183	3.07428	4.93536	3.7303	6.53256	3.277	0.407938	0.741968	0.0439501	1.90348	1.32305	1.99346	-2.12842	0.00999926	1	-	-	-	+	+	+	Intron (XM_001120442.5/724552, intron 1 of 3)	2466367	2479648	13282	+	724552	XM_001120442.5
NC_037647.1	9992583	9993966	9992695;9993126;9993713;9993023;9993714;9993735	42	135	66	153	65	150	196	148	363	133	344	129	2.73394	7.4188	3.12086	8.7472	3.40164	8.30047	10.7739	6.73629	18.5203	6.8474	17.4708	7.345	0.368515	0.356784	0.409813	1.59938	2.70472	2.3786	-2.5576	0.0297784	1	-	-	-	+	+	+	Promoter (<=1kb)	9991646	9994005	2360	-	724626	XM_001119823.5
NC_037639.1	3951573	3953249	3952227;3952137;3952127	32	141	157	140	60	120	120	144	427	124	724	115	2.09814	7.7461	7.35964	8.0088	3.14394	6.65137	6.61749	6.55545	21.7766	6.3875	36.714	6.554	0.270864	0.918944	0.472676	1.00946	3.40925	5.60177	-2.59154	0.168007	1	-	-	-	+	+	+	Distal Intergenic	3946089	3949142	3054	+	724716	XM_006559127.3
NC_037643.1	15062223	15062699	15062449;15062504;15062467	17	88	94	66	38	66	150	91	217	75	156	79	1.14444	4.85495	4.4251	3.8056	2.01006	3.68299	8.25819	4.15932	11.0918	3.8836	7.95048	4.52	0.235726	1.16279	0.545769	1.98547	2.85606	1.75896	-1.76333	0.0243916	1	-	-	-	+	+	+	Promoter (1-2kb)	15046845	15064384	17540	-	724747	XM_016912795.2
NC_037640.1	9909372	9909848	9909553;9909607;9909593	17	52	65	54	15	37	118	55	156	61	159	48	1.14444	2.89115	3.07428	3.124	0.82464	2.08886	6.50811	2.53176	7.98816	3.1682	8.1024	2.7685	0.395842	0.984085	0.39478	2.57059	2.52136	2.92664	-2.17577	0.00172792	1	-	-	-	+	+	+	Intron (XM_026439393.1/724779, intron 2 of 3)	9906338	9916267	9930	+	724779	XM_016911444.2
NC_037638.1	14476998	14477497	14477220;14477208;14477327	7	67	102	65	13	51	148	65	135	70	173	64	0.50864	3.7094	4.79774	3.7488	0.72156	2.85844	8.14881	2.98386	6.91968	3.6281	8.81136	3.6725	0.137122	1.27981	0.252431	2.73096	1.90725	2.39928	-2.07577	0.0196672	1	-	-	-	+	+	+	Intron (XM_001120512.5/724618, intron 4 of 9)	14442380	14447673	5294	+	724796	XM_001120698.5
NC_037651.1	3015443	3017163	3015862;3016321;3016738;3015658;3015788;3016305;3016284;3016871	35	165	101	161	61	157	230	198	926	165	973	132	2.28888	9.0553	4.75116	9.2016	3.19548	8.68526	12.6334	8.99679	47.1658	8.4826	49.3234	7.5145	0.252767	0.516341	0.36792	1.40421	5.5603	6.56376	-3.57264	0.120043	1	-	-	-	+	+	+	3' UTR	3009698	3014139	4442	+	724804	XM_026445088.1
NC_037648.1	10407766	10408712	10408100;10408112;10408136	17	111	64	98	22	96	93	116	537	107	543	104	1.14444	6.1096	3.0277	5.6232	1.18542	5.33209	5.14086	5.28957	27.3734	5.5188	27.5482	5.9325	0.187318	0.53843	0.222318	0.971886	4.96003	4.64361	-3.4796	0.127935	1	-	-	-	+	+	+	Promoter (<=1kb)	10407813	10417739	9927	+	724955	XM_006564395.3
NC_037650.1	10073695	10074183	10073969;10073995;10074006	14	64	79	65	43	68	255	82	169	87	167	62	0.9537	3.54575	3.7264	3.7488	2.26776	3.79293	14.0006	3.75243	8.6496	4.4968	8.50752	3.5595	0.26897	0.994025	0.597891	3.73108	1.9235	2.39009	-2.11204	0.0482254	1	-	-	-	+	+	+	Distal Intergenic	10057492	10060996	3505	-	725053	XM_001120949.5
NC_037638.1	14773967	14774748	14774492;14774460;14774453	15	75	61	81	24	84	134	95	277	74	295	71	1.01728	4.1458	2.88796	4.6576	1.2885	4.67245	7.38315	4.34016	14.1446	3.8325	14.9894	4.068	0.245376	0.620053	0.275765	1.70112	3.6907	3.68471	-2.9916	0.0531976	1	-	-	-	+	+	+	3' UTR	14752857	14772072	19216	+	725068	XM_026439369.1
NC_037638.1	27521659	27522942	27521959;27522003;27521972;27522567;27522715;27522811	91	158	105	129	115	174	344	154	332	137	375	134	5.84936	8.67345	4.93748	7.384	5.97864	9.61975	18.8681	7.00755	16.943	7.0518	19.0406	7.6275	0.674398	0.668673	0.621496	2.69254	2.40265	2.49631	-1.95017	0.0014848	1	-	-	-	+	+	+	Promoter (2-3kb)	27469815	27525704	55890	-	725081	XM_026446160.1
NC_037638.1	27519749	27520641	27519892;27519983;27520425;27519950;27520452;27520488	85	102	102	123	90	103	320	160	210	100	245	100	5.46788	5.61865	4.79774	7.0432	4.69014	5.71688	17.5555	7.27881	10.7357	5.1611	12.4574	5.7065	0.973166	0.681188	0.820402	2.41186	2.08012	2.18302	-1.43148	0.000464046	1	-	-	-	+	+	+	Intron (XM_026446160.1/725081, intron 1 of 12)	27469815	27525704	55890	-	725081	XM_026446160.1
NC_037642.1	4970185	4970850	4970468;4970624;4970610	20	89	84	72	22	61	123	77	225	85	267	77	1.33518	4.9095	3.9593	4.1464	1.18542	3.40814	6.78156	3.52638	11.4989	4.3946	13.5715	4.407	0.271958	0.954877	0.34782	1.92309	2.6166	3.07953	-2.27461	0.010946	1	-	-	-	+	+	+	3' UTR	4961399	4965323	3925	-	725127	XM_006561069.3
NC_037650.1	10777511	10778375	10778003;10778052;10778023	25	65	131	85	42	74	295	98	375	92	418	90	1.65308	3.6003	6.14856	4.8848	2.21622	4.12275	16.1882	4.47579	19.1309	4.7523	21.2182	5.1415	0.459151	1.25871	0.537559	3.61684	4.02561	4.12685	-2.38356	0.00112731	1	-	-	-	+	+	+	Promoter (1-2kb)	10775949	10779935	3987	-	725159	XM_016915831.2
NC_037652.1	5673287	5673671	5673481;5673473;5673504	10	38	76	35	12	41	91	49	148	42	128	50	0.69938	2.12745	3.58666	2.0448	0.67002	2.30874	5.03148	2.2605	7.58112	2.1973	6.53256	2.8815	0.328741	1.75404	0.29021	2.22583	3.4502	2.26707	-1.74299	0.0431949	1	-	-	-	+	+	+	Promoter (<=1kb)	5673199	5673954	756	-	725202	XM_001121077.5
NC_037642.1	5470501	5472527	5470832;5471754;5472286;5470918;5471680;5470939;5472306	57	161	203	156	83	221	222	245	603	186	899	150	3.68764	8.8371	9.50232	8.9176	4.32936	12.2033	12.1959	11.1217	30.7315	9.5557	45.576	8.5315	0.417291	1.06557	0.35477	1.09659	3.21604	5.34209	-2.39339	0.16348	1	-	-	-	+	+	+	Promoter (<=1kb)	5471895	5473163	1269	+	725212	XM_001121088.5
NC_037643.1	9739358	9739748	9739567;9739570;9739549	72	54	104	71	68	65	169	62	101	45	118	67	4.64134	3.00025	4.8909	4.0896	3.55626	3.62802	9.2973	2.84823	5.18976	2.3506	6.02616	3.842	1.54698	1.19594	0.980221	3.26424	2.20784	1.5685	-0.919174	0.144496	1	-	-	-	+	+	+	Promoter (<=1kb)	9738405	9760616	22212	+	725218	XM_006565331.3
NC_037645.1	1742104	1743388	1742502;1743088;1742481;1743057;1743049	36	110	69	104	64	99	128	93	680	82	650	89	2.35246	6.05505	3.2606	5.964	3.3501	5.497	7.05501	4.24974	34.6493	4.2413	32.9666	5.085	0.388512	0.546714	0.609442	1.6601	8.1695	6.48311	-3.40063	0.127459	1	-	-	-	+	+	+	Promoter (<=1kb)	1741846	1742562	717	-	725234	XM_016913308.1
NC_037643.1	16288307	16288764	16288538;16288467;16288474	25	67	95	43	30	72	92	64	134	74	135	64	1.65308	3.7094	4.47168	2.4992	1.59774	4.01281	5.08617	2.93865	6.8688	3.8325	6.88704	3.6725	0.445646	1.78924	0.39816	1.73078	1.79225	1.8753	-1.03578	0.179628	1	-	-	-	+	+	+	Promoter (2-3kb)	16285727	16323736	38010	+	725259	XM_026441110.1
NC_037646.1	10859057	10859817	10859197;10859474;10859669;10859662	53	109	121	84	88	91	179	104	154	92	180	86	3.43332	6.0005	5.68276	4.828	4.58706	5.05724	9.8442	4.74705	7.8864	4.7523	9.16584	4.9155	0.572172	1.17704	0.907028	2.07375	1.65949	1.86468	-1.0755	0.0131395	1	-	-	-	+	+	+	Promoter (2-3kb)	10824799	10862046	37248	-	725336	XM_006567480.3
NC_037648.1	1266649	1267328	1266752;1267036;1267018	40	56	87	72	40	53	103	64	407	75	356	45	2.60678	3.10935	4.09904	4.1464	2.11314	2.96838	5.68776	2.93865	20.759	3.8836	18.0785	2.599	0.838368	0.988578	0.711883	1.9355	5.3453	6.95594	-2.48738	0.118484	1	-	-	-	+	+	+	Promoter (<=1kb)	1266765	1270054	3290	+	725390	XM_006558547.3
NC_037648.1	15928222	15930354	15928714;15929341;15929774;15930175;15928782;15929812;15928728	106	223	149	233	154	214	186	270	1603	171	1522	175	6.80306	12.2192	6.987	13.2912	7.9887	11.8186	10.227	12.2519	81.6115	8.7892	77.1247	9.944	0.556752	0.525686	0.675943	0.834728	9.28543	7.7559	-3.34571	0.1747	1	-	-	-	+	+	+	Promoter (<=1kb)	15928852	15935242	6391	+	725391	XM_026444122.1
NC_037651.1	2450158	2450719	2450317;2450548;2450319;2450581;2450356	38	78	91	84	95	73	178	109	187	86	144	65	2.47962	4.30945	4.28536	4.828	4.94784	4.06778	9.78951	4.9731	9.56544	4.4457	7.3428	3.729	0.575391	0.887606	1.21635	1.96849	2.15162	1.96911	-1.18438	0.0175817	1	-	-	-	+	+	+	Promoter (<=1kb)	2438198	2450378	12181	-	725453	XM_003249337.4
NC_037651.1	2444423	2444990	2444611;2444751;2444792	46	75	118	75	85	93	140	85	184	111	166	70	2.98826	4.1458	5.54302	4.3168	4.43244	5.16718	7.71129	3.88806	9.4128	5.7232	8.45688	4.0115	0.720792	1.28406	0.857806	1.98333	1.64467	2.10816	-1.00273	0.0130028	1	-	-	-	+	+	+	Intron (XM_003249337.4/725453, intron 2 of 2)	2438198	2450378	12181	-	725453	XM_003249337.4
NC_037642.1	13137423	13138674	13137720;13137656;13138014;13138436;13137615;13138394	46	132	151	110	40	122	136	180	356	150	407	118	2.98826	7.25515	7.08016	6.3048	2.11314	6.76131	7.49253	8.18301	18.1642	7.7161	20.6611	6.7235	0.411881	1.12298	0.312534	0.91562	2.35406	3.07297	-1.77959	0.128538	1	-	-	-	+	+	+	Promoter (<=1kb)	13121190	13138211	17022	-	725552	XM_006569901.3
NC_037645.1	6578953	6579765	6579418;6579411;6579471	42	54	123	74	51	48	103	68	451	93	498	70	2.73394	3.00025	5.77592	4.26	2.68008	2.69353	5.68776	3.11949	22.9978	4.8034	25.2694	4.0115	0.911237	1.35585	0.995007	1.8233	4.78782	6.29924	-1.98466	0.132776	1	-	-	-	+	+	+	Promoter (<=1kb)	6579241	6586719	7479	+	725679	XM_026442356.1
NC_037644.1	2339314	2339996	2339539;2339521;2339561	39	84	100	62	69	108	205	80	258	97	227	54	2.5432	4.63675	4.70458	3.5784	3.6078	5.99173	11.2661	3.66201	13.1779	5.0078	11.5459	3.1075	0.548488	1.31472	0.60213	3.07648	2.63147	3.71549	-1.93447	0.00519971	1	-	-	-	+	+	+	3' UTR	2336058	2343384	7327	-	725708	XM_001121525.5
NC_037648.1	15830047	15830980	15830166;15830482;15830484;15830797;15830818	17	132	75	97	36	108	137	115	235	89	239	94	1.14444	7.25515	3.54008	5.5664	1.90698	5.99173	7.54722	5.24436	12.0077	4.599	12.1536	5.3675	0.157742	0.635973	0.318269	1.43911	2.61094	2.26429	-2.5055	0.0251121	1	-	-	-	+	+	+	Promoter (1-2kb)	15828750	15835167	6418	+	725782	XM_026443604.1
NC_037642.1	7475200	7476124	7475553;7475533;7475389	41	82	65	80	73	97	106	109	779	74	907	84	2.67036	4.52765	3.07428	4.6008	3.81396	5.38706	5.85183	4.9731	39.6864	3.8325	45.9811	4.8025	0.589789	0.668206	0.707985	1.1767	10.3552	9.57441	-3.42435	0.162015	1	-	-	-	+	+	+	Promoter (<=1kb)	7475247	7479097	3851	+	725795	XM_001121602.5
NC_037643.1	15670339	15670881	15670528;15670520;15670655	45	53	115	84	43	66	93	63	143	87	139	37	2.92468	2.9457	5.40328	4.828	2.26776	3.68299	5.14086	2.89344	7.32672	4.4968	7.0896	2.147	0.992864	1.11915	0.615739	1.77673	1.62932	3.3021	-1.2982	0.12224	1	-	-	-	+	+	+	Promoter (1-2kb)	15667339	15668802	1464	-	725881	XM_006570953.2
NC_037638.1	13817866	13818526	13818249;13818106;13818085	53	77	84	58	53	70	120	106	142	106	152	80	3.43332	4.2549	3.9593	3.3512	2.78316	3.90287	6.61749	4.83747	7.27584	5.4677	7.74792	4.5765	0.80691	1.18146	0.713106	1.36797	1.33069	1.69298	-0.701013	0.0396349	1	-	-	-	+	+	+	Intron (XM_026445792.1/725885, intron 1 of 5)	13399347	13870812	471466	-	725885	XM_026445792.1
NC_037652.1	5867921	5869190	5868522;5868491;5868531	26	108	178	127	39	141	196	175	435	151	468	121	1.71666	5.94595	8.33782	7.2704	2.0616	7.80574	10.7739	7.95696	22.1837	7.7672	23.7502	6.893	0.288711	1.14682	0.264113	1.35402	2.85607	3.44555	-2.17129	0.0675877	1	-	-	-	+	+	+	Promoter (1-2kb)	5871052	5874802	3751	+	725890	XM_026445580.1
NC_037645.1	6619082	6619798	6619206;6619351;6619410	70	73	63	89	67	104	127	111	216	93	161	66	4.51418	4.0367	2.98112	5.112	3.50472	5.77185	7.00032	5.06352	11.041	4.8034	8.20368	3.7855	1.11828	0.583161	0.607209	1.3825	2.29858	2.16713	-1.34094	0.0332494	1	-	-	-	+	+	+	Promoter (<=1kb)	6618879	6624336	5458	+	725901	XM_016913621.2
NC_037648.1	3898939	3899766	3899020;3899492;3899497;3899580	26	75	81	100	49	110	154	112	178	124	244	83	1.71666	4.1458	3.81956	5.7368	2.577	6.10167	8.47695	5.10873	9.10752	6.3875	12.4068	4.746	0.414072	0.6658	0.422343	1.65931	1.42583	2.61416	-1.92369	0.0550597	1	-	-	-	+	+	+	Intron (XM_026443786.1/725924, intron 2 of 4)	3583920	4087918	503999	-	725924	XM_026443786.1
NC_037652.1	5915444	5917078	5915542;5916258;5916285;5916821;5915925	45	121	189	138	74	178	114	156	571	172	807	106	2.92468	6.6551	8.8502	7.8952	3.8655	9.83963	6.28935	7.09797	29.1034	8.8403	40.9171	6.0455	0.439464	1.12096	0.39285	0.886077	3.29213	6.76819	-2.48649	0.219508	1	-	-	-	+	+	+	Promoter (<=1kb)	5915203	5916217	1015	-	725954	XM_001121740.4
NC_037640.1	5430807	5431252	5430991;5430994;5431115	26	43	97	41	32	54	105	68	117	54	139	34	1.71666	2.4002	4.56484	2.3856	1.70082	3.02335	5.79714	3.11949	6.00384	2.8105	7.0896	1.9775	0.715215	1.9135	0.562561	1.85836	2.13622	3.58513	-1.24801	0.10293	1	-	-	-	+	+	+	Promoter (<=1kb)	5417827	5431154	13328	-	725959	XM_001121745.5
NC_037646.1	1258889	1259527	1259246;1259267;1259171	19	76	32	61	10	56	81	58	345	65	352	53	1.2716	4.20035	1.53714	3.5216	0.56694	3.13329	4.48458	2.66739	17.6045	3.3726	17.8759	3.051	0.302737	0.436489	0.180941	1.68126	5.21986	5.85903	-3.79361	0.0929582	1	-	-	-	+	+	+	Promoter (<=1kb)	1259059	1269549	10491	+	726003	NM_001278330.1
NC_037652.1	1434222	1434794	1434511;1434473;1434566	49	56	82	55	51	52	160	80	115	65	155	49	3.179	3.10935	3.86614	3.1808	2.68008	2.91341	8.80509	3.66201	5.90208	3.3726	7.89984	2.825	1.0224	1.21546	0.919912	2.40444	1.75001	2.7964	-1.13828	0.0448181	1	-	-	-	+	+	+	3' UTR	1427148	1430242	3095	-	726067	XM_026445516.1
NC_037642.1	13463250	13464679	13463878;13464446;13464147;13464193	37	179	117	135	35	173	200	206	517	169	544	130	2.41604	9.819	5.49644	7.7248	1.85544	9.56478	10.9927	9.35847	26.3558	8.687	27.5988	7.4015	0.246058	0.711532	0.193987	1.17463	3.03394	3.72881	-2.78505	0.0912332	1	-	-	-	+	+	+	3' UTR	13459653	13465020	5368	+	726286	XM_026440888.1
NC_037638.1	20422928	20423994	20423092;20423790;20423767;20423802	17	119	137	104	19	80	110	136	304	118	290	94	1.14444	6.546	6.42804	5.964	1.0308	4.45257	6.07059	6.19377	15.5184	6.0809	14.7362	5.3675	0.17483	1.07781	0.231507	0.980112	2.55199	2.74545	-2.08057	0.0847237	1	-	-	-	+	+	+	Promoter (1-2kb)	20421274	20445513	24240	+	726349	XM_006571293.3
NC_037650.1	6000673	6001266	6000844;6000956;6000908;6001136	25	79	113	76	47	58	173	82	155	75	147	81	1.65308	4.364	5.31012	4.3736	2.47392	3.24323	9.51606	3.75243	7.93728	3.8836	7.49472	4.633	0.378799	1.21413	0.762795	2.53597	2.04379	1.61768	-1.3955	0.0237235	1	-	-	-	+	+	+	Promoter (2-3kb)	5997947	6003348	5402	-	726391	XM_001122133.5
NC_037647.1	10737509	10738124	10737684;10737704;10737828	22	67	85	77	12	64	147	114	216	61	191	63	1.46234	3.7094	4.00588	4.4304	0.67002	3.57305	8.09412	5.19915	11.041	3.1682	9.72288	3.616	0.394225	0.90418	0.18752	1.55682	3.48494	2.68885	-2.37922	0.050977	1	-	-	-	+	+	+	Promoter (1-2kb)	10739843	10762438	22596	+	726414	XM_006566202.3
NC_037652.1	3687691	3689286	3688138;3688993;3688098;3688034;3688901	56	108	141	108	137	125	161	143	794	122	875	93	3.62406	5.94595	6.61436	6.1912	7.11252	6.92622	8.85978	6.51024	40.4496	6.2853	44.3606	5.311	0.609501	1.06835	1.0269	1.3609	6.43559	8.35259	-2.57789	0.164086	1	-	-	-	+	+	+	Downstream (2-3kb)	3691781	3696421	4641	-	726416	XM_026445308.1
NC_037638.1	15185769	15186505	15186003;15186058;15186051	24	93	75	65	22	74	110	103	386	76	343	64	1.5895	5.1277	3.54008	3.7488	1.18542	4.12275	6.07059	4.70184	19.6906	3.9347	17.4202	3.6725	0.309983	0.944324	0.287531	1.29111	5.00435	4.74342	-2.83987	0.113808	1	-	-	-	+	+	+	Promoter (<=1kb)	15185754	15186376	623	-	726447	XM_001120889.5
NC_037647.1	6586249	6586646	6586303;6586527;6586502;6586409	67	96	157	98	93	56	169	83	150	97	136	63	4.32344	5.29135	7.35964	5.6232	4.84476	3.13329	9.2973	3.79764	7.68288	5.0078	6.93768	3.616	0.817077	1.3088	1.54622	2.44818	1.53418	1.91861	-0.684347	0.0978232	1	-	-	-	+	+	+	Promoter (2-3kb)	6587620	6589278	1659	-	726592	XM_006562785.3
NC_037643.1	2642207	2642673	2642400;2642433;2642433	83	71	88	65	89	58	135	80	145	46	120	52	5.34072	3.9276	4.14562	3.7488	4.6386	3.24323	7.43784	3.66201	7.42848	2.4017	6.12744	2.9945	1.35979	1.10585	1.43024	2.03108	3.09301	2.04623	-0.880087	0.0804788	1	-	-	-	+	+	+	Distal Intergenic	2674934	2676864	1931	+	726672	XM_026441301.1
NC_037642.1	13100351	13101311	13100513;13100894;13101156;13100892;13100946	77	109	130	123	63	122	150	131	264	96	199	93	4.95924	6.0005	6.10198	7.0432	3.29856	6.76131	8.25819	5.96772	13.4832	4.9567	10.128	5.311	0.826471	0.866365	0.487858	1.38381	2.7202	1.90699	-1.46282	0.0706029	1	-	-	-	+	+	+	Promoter (<=1kb)	13100435	13102397	1963	+	726703	XM_016912205.2
NC_037649.1	9036764	9037351	9036975;9037034;9037155	26	96	80	69	23	68	139	87	182	92	166	72	1.71666	5.29135	3.77298	3.976	1.23696	3.79293	7.6566	3.97848	9.31104	4.7523	8.45688	4.1245	0.324428	0.948939	0.326123	1.9245	1.95927	2.0504	-1.89144	0.0175237	1	-	-	-	+	+	+	Intron (XM_026444488.1/726709, intron 7 of 33)	8850242	9081288	231047	-	726709	XM_026444488.1
NC_037638.1	7985132	7985808	7985542;7985557;7985478	21	42	92	59	23	78	88	87	264	75	252	55	1.39876	2.34565	4.33194	3.408	1.23696	4.34263	4.86741	3.97848	13.4832	3.8836	12.8119	3.164	0.596321	1.27111	0.284841	1.22343	3.47183	4.04927	-2.02252	0.113792	1	-	-	-	+	+	+	Intron (XM_001122450.5/726729, intron 1 of 5)	7981561	8147717	166157	+	726729	XM_001122450.5
NC_037650.1	2117454	2117883	2117622;2117592;2117718	3	68	54	58	7	58	97	58	118	54	116	48	0.25432	3.76395	2.5619	3.3512	0.41232	3.24323	5.35962	2.66739	6.05472	2.8105	5.92488	2.7685	0.0675673	0.764472	0.127133	2.00931	2.15432	2.1401	-2.71635	0.0125505	1	-	-	-	+	+	+	Exon (XM_001122457.5/726736, exon 5 of 14)	2106765	2126275	19511	-	726736	XM_001122457.5
NC_037638.1	1005503	1006101	1005871;1005903;1005903	27	64	52	63	25	71	119	87	196	74	191	60	1.78024	3.54575	2.46874	3.6352	1.34004	3.95784	6.5628	3.97848	10.0234	3.8325	9.72288	3.4465	0.502077	0.679121	0.338579	1.64957	2.61537	2.82109	-2.22112	0.0288201	1	-	-	-	+	+	+	3' UTR	1001014	1002244	1231	-	726788	XM_001122509.5
NC_037645.1	11850304	11854617	11850788;11851302;11852176;11852678;11853455;11854046;11854508;11850526;11851303;11852139;11852739;11852111;11852672;11854446	90	344	262	355	141	404	726	412	1483	355	2427	297	5.78578	18.8197	12.2505	20.2208	7.31868	22.2629	39.7596	18.6717	75.5059	18.1916	122.954	16.837	0.307432	0.605837	0.328739	2.1294	4.15059	7.30261	-3.45101	0.111281	1	-	-	-	+	+	+	Promoter (<=1kb)	11848693	11852800	4108	-	726848	NM_001110764.1
NC_037641.1	3449263	3449588	3449428;3449439;3449463	7	15	63	28	10	28	69	25	73	19	106	26	0.50864	0.8728	2.98112	1.6472	0.56694	1.59413	3.8283	1.17546	3.76512	1.022	5.41848	1.5255	0.582768	1.80981	0.355642	3.25685	3.68407	3.55194	-1.93284	0.0226216	1	-	-	-	+	+	+	Promoter (<=1kb)	3441632	3449085	7454	-	726949	XM_016911848.1
NC_037641.1	3449939	3450507	3450212;3450223;3450233	16	48	103	41	14	33	99	29	273	47	234	38	1.08086	2.67295	4.84432	2.3856	0.7731	1.86898	5.469	1.3563	13.9411	2.4528	11.9004	2.2035	0.40437	2.03065	0.413648	4.03229	5.68375	5.40068	-2.40779	0.00537015	1	-	-	-	+	+	+	Promoter (<=1kb)	3441632	3450254	8623	-	726949	XM_006558706.2
NC_037639.1	10519305	10520584	10519483;10520023;10519511;10519993;10520362;10519969	28	74	119	60	61	103	116	96	436	91	683	69	1.84382	4.09125	5.5896	3.4648	3.19548	5.71688	6.39873	4.38537	22.2346	4.7012	34.6378	3.955	0.450674	1.61325	0.558955	1.45911	4.72956	8.75798	-2.5106	0.187873	1	-	-	-	+	+	+	Promoter (<=1kb)	10517417	10520528	3112	-	726956	XM_006565852.3
NC_037638.1	12148155	12148672	12148294;12148515;12148436;12148349	23	78	97	60	27	68	186	115	144	83	132	70	1.52592	4.30945	4.56484	3.4648	1.44312	3.79293	10.227	5.24436	7.3776	4.2924	6.73512	4.0115	0.354087	1.31749	0.380476	1.95009	1.71876	1.67895	-1.38188	0.0654589	1	-	-	-	+	+	+	Intron (XM_001122688.5/726972, intron 1 of 4)	12073197	12170406	97210	-	726972	XM_001122688.5
NC_037648.1	4546823	4547191	4547039;4546971;4546980	24	37	71	36	20	49	83	49	94	49	105	47	1.5895	2.0729	3.35376	2.1016	1.08234	2.7485	4.59396	2.2605	4.8336	2.555	5.36784	2.712	0.7668	1.59581	0.393793	2.03228	1.89182	1.97929	-1.09875	0.0961913	1	-	-	-	+	+	+	Intron (XM_026443711.1/726993, intron 2 of 6)	4518240	4638456	120217	+	726993	XM_026443710.1
NC_037642.1	13844880	13845543	13845012;13845091;13845154	63	84	86	69	66	94	104	101	122	72	170	79	4.06912	4.63675	4.05246	3.976	3.45318	5.22215	5.74245	4.61142	6.25824	3.7303	8.65944	4.52	0.87758	1.01923	0.661256	1.24527	1.67768	1.91581	-0.91958	0.0408872	1	-	-	-	+	+	+	3' UTR	13844908	13850122	5215	-	726999	XM_026440654.1
NC_037644.1	5352047	5352462	5352216;5352224;5352310	24	67	99	59	34	47	90	48	136	57	98	44	1.5895	3.7094	4.658	3.408	1.8039	2.63856	4.97679	2.21529	6.97056	2.9638	5.01336	2.5425	0.428506	1.36678	0.683668	2.24656	2.3519	1.97182	-1.40622	0.0266243	1	-	-	-	+	+	+	Intron (XM_016913181.2/727091, intron 2 of 7)	5302978	5523561	220584	+	727091	XM_026442001.1
NC_037649.1	2485253	2485781	2485464;2485490;2485549	17	63	94	59	25	69	105	59	157	76	180	60	1.14444	3.4912	4.4251	3.408	1.34004	3.8479	5.79714	2.7126	8.03904	3.9347	9.16584	3.4465	0.327807	1.29844	0.348252	2.13712	2.04311	2.65946	-1.79244	0.0188095	1	-	-	-	+	+	+	Promoter (<=1kb)	2451558	2485634	34077	-	727237	XM_003249415.4
NC_037642.1	13266836	13267440	13267147;13267183;13267246	12	54	80	37	40	47	83	63	347	80	299	52	0.82654	3.00025	3.77298	2.1584	2.11314	2.63856	4.59396	2.89344	17.7062	4.1391	15.192	2.9945	0.27549	1.74804	0.800869	1.58772	4.27779	5.0733	-1.95344	0.109565	1	-	-	-	+	+	+	Promoter (<=1kb)	13267180	13277768	10589	+	727246	XM_026441083.1
NC_037639.1	8377487	8378234	8377671;8378046;8377680;8378024;8378074	20	147	109	129	51	96	290	110	256	82	186	107	1.33518	8.0734	5.1238	7.384	2.68008	5.33209	15.9148	5.01831	13.0762	4.2413	9.46968	6.102	0.16538	0.693906	0.502632	3.17135	3.08306	1.5519	-2.519	0.0456169	1	-	-	-	+	+	+	Distal Intergenic	8167809	8221278	53470	-	727308	XM_026439066.1
NC_037651.1	10455656	10456634	10455923;10456364;10455992;10456323	36	141	134	86	48	88	151	160	258	130	316	85	2.35246	7.7461	6.2883	4.9416	2.52546	4.89233	8.31288	7.27881	13.1779	6.6941	16.0529	4.859	0.303696	1.27252	0.516208	1.14207	1.96858	3.30375	-1.61614	0.135253	1	-	-	-	+	+	+	Promoter (1-2kb)	10454472	10457395	2924	+	727311	XM_016916306.2
NC_037638.1	13318108	13318729	13318227;13318272;13318604	49	97	70	78	73	90	152	94	138	83	119	47	3.179	5.3459	3.30718	4.4872	3.81396	5.00227	8.36757	4.29495	7.07232	4.2924	6.0768	2.712	0.594661	0.737025	0.762446	1.94823	1.64764	2.24071	-1.47877	0.0125118	1	-	-	-	+	+	+	Promoter (<=1kb)	13311175	13319041	7867	-	727522	XM_001123230.5
NC_037648.1	10461921	10462863	10462581;10462543;10462566	13	52	20	78	30	79	94	80	454	83	409	76	0.89012	2.89115	0.97818	4.4872	1.59774	4.3976	5.19555	3.66201	23.1504	4.2924	20.7624	4.3505	0.307877	0.217993	0.363321	1.41877	5.39335	4.77242	-3.70356	0.101725	1	-	-	-	+	+	+	Promoter (<=1kb)	10461904	10466548	4645	+	727593	XM_016914951.2
NC_037652.1	2741061	2742745	2741313;2741855;2741301;2741885;2741887	78	81	136	130	145	132	139	127	1265	134	1742	77	5.02282	4.4731	6.38146	7.4408	7.52484	7.31101	7.6566	5.78688	64.4141	6.8985	88.2655	4.407	1.12289	0.857631	1.02925	1.3231	9.33741	20.0285	-3.34999	0.230686	1	-	-	-	+	+	+	Promoter (<=1kb)	2741183	2743234	2052	+	727622	XM_026445509.1
NC_037642.1	13478626	13479447	13478831;13479286;13478792;13478851	37	30	44	37	54	28	102	53	181	25	331	36	2.41604	1.69105	2.0961	2.1584	2.8347	1.59413	5.63307	2.44134	9.26016	1.3286	16.8125	2.0905	1.42872	0.971136	1.77821	2.30737	6.96986	8.04233	-2.05149	0.128217	1	-	-	-	+	+	+	Promoter (<=1kb)	13480118	13487797	7680	+	100049571	NR_003566.1
NC_037639.1	2488241	2488858	2488381;2488517;2488684	46	84	59	72	70	85	122	97	177	87	155	61	2.98826	4.63675	2.7948	4.1464	3.65934	4.72742	6.72687	4.43058	9.05664	4.4968	7.89984	3.503	0.644473	0.67403	0.774067	1.51828	2.01402	2.25516	-1.46766	0.0264855	1	-	-	-	+	+	+	Promoter (<=1kb)	2487293	2488678	1386	-	100217360	NM_001142693.1
NC_037639.1	4841976	4842524	4842192;4842174;4842196	19	51	67	21	24	49	232	52	155	64	241	40	1.2716	2.8366	3.16744	1.2496	1.2885	2.7485	12.7428	2.39613	7.93728	3.3215	12.2549	2.3165	0.448283	2.53476	0.468801	5.31808	2.38967	5.29027	-1.91285	0.062236	1	-	-	-	+	+	+	Promoter (<=1kb)	4842239	4842258	20	-	100315665	100315665
NC_037650.1	9618545	9619026	9618829;9618945;9618808;9618864	5	82	91	80	23	75	96	77	143	70	188	86	0.38148	4.52765	4.28536	4.6008	1.23696	4.17772	5.30493	3.52638	7.32672	3.6281	9.57096	4.9155	0.0842556	0.931438	0.296085	1.50436	2.01944	1.9471	-2.06025	0.0147896	1	-	-	-	+	+	+	Distal Intergenic	9610356	9610455	100	-	100315688	NR_034299.1
NC_037648.1	2027970	2028577	2028051;2028338;2028458;2028453	28	56	111	65	21	76	89	88	96	64	148	65	1.84382	3.10935	5.21696	3.7488	1.13388	4.23269	4.9221	4.02369	4.93536	3.3215	7.54536	3.729	0.592992	1.39163	0.267886	1.22328	1.48588	2.02343	-1.07109	0.120934	1	-	-	-	+	+	+	Distal Intergenic	2058723	2065932	7210	+	100576080	XR_001705094.2
NC_037638.1	19332267	19333525	19332882;19332875;19332865	64	114	148	91	95	100	154	131	812	106	1009	110	4.1327	6.27325	6.94042	5.2256	4.94784	5.55197	8.47695	5.96772	41.3654	5.4677	51.1464	6.2715	0.658781	1.32816	0.891186	1.42047	7.56541	8.15537	-2.57427	0.156871	1	-	-	-	+	+	+	Promoter (<=1kb)	19323930	19333458	9529	-	100576169	XM_003251652.4
NC_037646.1	1990953	1991374	1991151;1991098;1991184	11	56	28	49	11	59	84	53	140	63	117	53	0.76296	3.10935	1.35082	2.84	0.61848	3.2982	4.64865	2.44134	7.17408	3.2704	5.97552	3.051	0.245376	0.475641	0.18752	1.90414	2.19364	1.95854	-2.73682	0.000163437	1	-	-	-	+	+	+	Distal Intergenic	2032180	2033682	1503	+	100576170	XM_003251817.4
NC_037643.1	2117672	2118205	2117898;2117925;2117936	31	104	61	73	20	89	178	83	219	99	170	75	2.03456	5.72775	2.88796	4.2032	1.08234	4.9473	9.78951	3.79764	11.1936	5.11	8.65944	4.294	0.355211	0.687086	0.218774	2.57779	2.19053	2.01664	-2.42769	0.00119404	1	-	-	-	+	+	+	Promoter (2-3kb)	2121018	2132001	10984	+	100576172	XM_016912626.2
NC_037647.1	5872968	5873796	5873457;5873344;5873408	34	95	95	86	16	79	151	96	386	64	342	67	2.2253	5.2368	4.47168	4.9416	0.87618	4.3976	8.31288	4.38537	19.6906	3.3215	17.3695	3.842	0.424935	0.904905	0.19924	1.89559	5.92823	4.52095	-3.01316	0.0885085	1	-	-	-	+	+	+	Intron (XM_026443395.1/100576223, intron 3 of 8)	5817758	5880621	62864	-	100576223	XM_026443395.1
NC_037643.1	2423125	2424337	2423466;2424101;2423340;2423449	9	86	144	104	63	79	218	132	269	114	416	85	0.6358	4.74585	6.7541	5.964	3.29856	4.3976	11.9771	6.01293	13.7376	5.8765	21.1169	4.859	0.13397	1.13248	0.750082	1.99189	2.33772	4.34594	-2.10508	0.0787688	1	-	-	-	+	+	+	Promoter (1-2kb)	2413035	2421164	8130	-	100576233	XM_026441381.1
NC_037647.1	2480843	2481309	2480968;2481015;2481007	58	68	137	71	50	70	126	83	156	79	141	47	3.75122	3.76395	6.42804	4.0896	2.62854	3.90287	6.94563	3.79764	7.98816	4.088	7.19088	2.712	0.996618	1.5718	0.673489	1.82893	1.95405	2.6515	-0.988982	0.0440756	1	-	-	-	+	+	+	Intron (XM_006559228.2/100576247, intron 1 of 1)	2470090	2495006	24917	+	100576247	XM_006559225.3
NC_037646.1	6756276	6757207	6756390;6756762;6757137;6756809;6756816	14	87	100	95	16	85	191	121	196	79	235	85	0.9537	4.8004	4.70458	5.4528	0.87618	4.72742	10.5005	5.51562	10.0234	4.088	11.951	4.859	0.198671	0.862782	0.18534	1.90378	2.45191	2.45956	-2.45054	0.00344509	1	-	-	-	+	+	+	Promoter (<=1kb)	6755658	6762971	7314	+	100576271	XM_026443061.1
NC_037646.1	11303707	11304611	11303846;11303973;11304087	106	142	119	122	93	112	137	142	256	108	219	116	6.80306	7.80065	5.5896	6.9864	4.84476	6.21161	7.54722	6.46503	13.0762	5.5699	11.1408	6.6105	0.872115	0.800069	0.779952	1.16739	2.34765	1.68532	-1.08457	0.114478	1	-	-	-	+	+	+	Promoter (<=1kb)	11293524	11304738	11215	-	100576355	XM_026442979.1
NC_037645.1	1152655	1153819	1153031;1153428;1153677;1153045;1153384;1153680;1153139	61	138	156	127	67	133	203	158	303	128	326	100	3.94196	7.58245	7.31306	7.2704	3.50472	7.36598	11.1568	7.18839	15.4675	6.5919	16.5593	5.7065	0.519879	1.00587	0.475798	1.55206	2.34644	2.90183	-1.76449	0.0390446	1	-	-	-	+	+	+	Intron (XM_003249196.4/100576405, intron 1 of 6)	979012	1164689	185678	-	100576405	XM_003249196.4
NC_037645.1	1151027	1151783	1151115;1151373;1151227	10	82	56	79	20	92	107	102	182	64	188	110	0.69938	4.52765	2.65506	4.544	1.08234	5.11221	5.90652	4.65663	9.31104	3.3215	9.57096	6.2715	0.154469	0.5843	0.211717	1.26841	2.80326	1.5261	-2.55812	0.0727897	1	-	-	-	+	+	+	Intron (XM_003249196.4/100576405, intron 1 of 6)	979012	1164689	185678	-	100576405	XM_003249196.4
NC_037645.1	1108307	1109083	1108397;1108735;1108856;1108977	70	95	130	108	102	102	223	127	199	74	187	104	4.51418	5.2368	6.10198	6.1912	5.30862	5.66191	12.2506	5.78688	10.176	3.8325	9.52032	5.9325	0.862011	0.985589	0.937602	2.11696	2.65519	1.60477	-1.19508	0.0567122	1	-	-	-	+	+	+	Intron (XM_003249196.4/100576405, intron 2 of 6)	979012	1164689	185678	-	100576405	XM_003249196.4
NC_037645.1	1102644	1103946	1102792;1103053;1103674;1103057;1103664;1103614	13	145	88	143	25	123	128	148	459	132	410	124	0.89012	7.9643	4.14562	8.1792	1.34004	6.81628	7.05501	6.73629	23.4048	6.7963	20.813	7.0625	0.111764	0.506849	0.196594	1.04731	3.44376	2.94697	-3.18969	0.0904866	1	-	-	-	+	+	+	Intron (XM_003249196.4/100576405, intron 2 of 6)	979012	1164689	185678	-	100576405	XM_003249196.4
NC_037650.1	5595190	5596292	5595308;5595996;5595322;5595977;5595980	42	157	209	144	81	134	279	149	433	137	413	142	2.73394	8.6189	9.7818	8.236	4.22628	7.42095	15.3132	6.7815	22.0819	7.0518	20.965	8.0795	0.317203	1.18769	0.569507	2.25808	3.13138	2.59484	-1.94447	0.00557733	1	-	-	-	+	+	+	Promoter (1-2kb)	5587282	5593549	6268	-	100576555	XM_003249623.4
NC_037638.1	12610360	12611067	12610849;12610812;12610907	20	85	109	79	25	50	114	69	152	61	228	74	1.33518	4.6913	5.1238	4.544	1.34004	2.80347	6.28935	3.1647	7.78464	3.1682	11.5966	4.2375	0.284608	1.1276	0.477993	1.98734	2.45712	2.73666	-1.92567	0.00670396	1	-	-	-	+	+	+	Distal Intergenic	12604443	12610130	5688	+	100576586	XM_026446191.1
NC_037639.1	1051168	1052568	1051305;1051313;1051725;1052410;1051390;1051762;1052388	22	137	72	133	28	150	124	161	361	153	330	89	1.46234	7.5279	3.40034	7.6112	1.49466	8.30047	6.83625	7.32402	18.4186	7.8694	16.7618	5.085	0.194256	0.446755	0.180069	0.933401	2.34053	3.29632	-3.00036	0.105633	1	-	-	-	+	+	+	Promoter (<=1kb)	1051119	1052985	1867	+	100576623	XM_006572117.3
NC_037642.1	6821674	6822260	6821804;6821847;6822021	9	81	113	73	15	73	91	72	155	66	143	70	0.6358	4.4731	5.31012	4.2032	0.82464	4.06778	5.03148	3.30033	7.93728	3.4237	7.29216	4.0115	0.142139	1.26335	0.202725	1.52454	2.31833	1.81781	-1.81552	0.0440667	1	-	-	-	+	+	+	Distal Intergenic	6830346	6833823	3478	-	100576657	XR_120169.4
NC_037645.1	975987	977911	976373;977500;976391;977493;977533	35	151	62	198	68	159	126	196	407	180	605	171	2.28888	8.2916	2.93454	11.3032	3.55626	8.7952	6.94563	8.90637	20.759	9.2491	30.6878	9.718	0.276048	0.25962	0.404341	0.77985	2.24443	3.15783	-2.71735	0.127078	1	-	-	-	+	+	+	Promoter (1-2kb)	974424	977382	2959	+	100576699	XR_119774.4
NC_037638.1	1513451	1514541	1513992;1514363;1513966;1513635;1514001	20	103	169	116	43	78	294	130	478	103	543	85	1.33518	5.6732	7.9186	6.6456	2.26776	4.34263	16.1335	5.92251	24.3715	5.3144	27.5482	4.859	0.235349	1.19156	0.522209	2.7241	4.58594	5.66952	-2.73535	0.0397342	1	-	-	-	+	+	+	Intron (XM_006558554.3/100576700, intron 1 of 5)	1491999	1643433	151435	+	100576700	XM_006558554.3
NC_037639.1	818918	820446	819062;819450;820100;819050;820148;820062	32	109	110	91	49	122	131	127	503	82	620	87	2.09814	6.0005	5.17038	5.2256	2.577	6.76131	7.21908	5.78688	25.6435	4.2413	31.4474	4.972	0.349661	0.989433	0.381139	1.24749	6.04614	6.3249	-2.9849	0.135713	1	-	-	-	+	+	+	Intron (XM_026439230.1/100576733, intron 1 of 9)	850607	1005963	155357	+	100576733	XM_026439233.1
NC_037651.1	3444138	3444955	3444558;3444590;3444650	18	66	113	86	16	91	243	115	249	74	327	79	1.20802	3.65485	5.31012	4.9416	0.87618	5.05724	13.3444	5.24436	12.72	3.8325	16.6099	4.52	0.330525	1.07458	0.173253	2.54452	3.31898	3.67476	-2.59531	0.00403043	1	-	-	-	+	+	+	Promoter (1-2kb)	3440440	3443061	2622	-	100576738	XM_016916321.2
NC_037648.1	13646600	13647545	13647121;13647192;13646998	43	108	166	121	36	107	109	131	346	99	376	92	2.79752	5.94595	7.77886	6.9296	1.90698	5.93676	6.0159	5.96772	17.6554	5.11	19.0913	5.2545	0.470492	1.12256	0.321216	1.00807	3.45507	3.63332	-2.0805	0.12622	1	-	-	-	+	+	+	Promoter (<=1kb)	13643444	13647052	3609	-	100576742	XM_006566483.3
NC_037653.1	1805246	1806609	1805402;1805720;1806203;1806020;1806333;1806466	37	137	161	107	74	160	182	183	312	120	327	127	2.41604	7.5279	7.54596	6.1344	3.8655	8.85017	10.0083	8.31864	15.9254	6.1831	16.6099	7.232	0.320945	1.23011	0.436771	1.20312	2.57563	2.29672	-1.61181	0.0626069	1	-	-	-	+	+	+	3' UTR	1792895	1800620	7726	-	100576779	XM_026445904.1
NC_037644.1	2282254	2282927	2282322;2282626;2282502;2282436;2282786	49	95	95	77	76	91	148	84	184	115	214	99	3.179	5.2368	4.47168	4.4304	3.96858	5.05724	8.14881	3.84285	9.4128	5.9276	10.8876	5.65	0.60705	1.00932	0.784732	2.12051	1.58796	1.92701	-1.23084	0.00645739	1	-	-	-	+	+	+	Distal Intergenic	2269768	2274087	4320	-	100576841	XR_001703751.2
NC_037645.1	4082769	4084018	4082901;4083252;4083693;4083295;4083641	48	143	169	148	60	113	145	150	335	143	253	131	3.11542	7.8552	7.9186	8.4632	3.14394	6.26658	7.98474	6.82671	17.0957	7.3584	12.8626	7.458	0.396606	0.935651	0.501699	1.16963	2.32329	1.72467	-1.50843	0.0579782	1	-	-	-	+	+	+	Intron (XM_003250084.4/100576912, intron 2 of 6)	4064269	4100647	36379	+	100576912	XM_003250084.4
NC_037638.1	7065789	7066230	7066058;7066087;7065966	38	73	86	68	46	52	104	77	141	68	119	43	2.47962	4.0367	4.05246	3.9192	2.42238	2.91341	5.74245	3.52638	7.22496	3.5259	6.0768	2.486	0.614269	1.034	0.831459	1.62843	2.04911	2.44441	-1.30381	0.0196653	1	-	-	-	+	+	+	Promoter (<=1kb)	7064985	7066366	1382	-	100576961	XM_026440516.1
NC_037651.1	7501331	7501994	7501594;7501619;7501630	19	88	141	90	34	80	196	74	399	73	274	89	1.2716	4.85495	6.61436	5.1688	1.8039	4.45257	10.7739	3.39075	20.352	3.7814	13.926	5.085	0.261918	1.27967	0.405137	3.17744	5.38213	2.73864	-2.53697	0.0479457	1	-	-	-	+	+	+	Promoter (1-2kb)	7454837	7503621	48785	-	100577030	XM_026445146.1
NC_037638.1	24721102	24721663	24721323;24721457;24721452	29	70	130	78	43	72	211	104	162	110	151	67	1.9074	3.87305	6.10198	4.4872	2.26776	4.01281	11.5943	4.74705	8.29344	5.6721	7.69728	3.842	0.49248	1.35986	0.56513	2.44242	1.46215	2.00346	-1.28918	0.0427785	1	-	-	-	+	+	+	Intron (XM_026446250.1/100577142, intron 6 of 8)	24703832	24726671	22840	+	100577142	XM_026446250.1
NC_037640.1	2219985	2220319	2220130;2220153;2220203	40	75	69	66	64	43	126	76	78	45	120	50	2.60678	4.1458	3.2606	3.8056	3.3501	2.41868	6.94563	3.48117	4.01952	2.3506	6.12744	2.8815	0.628776	0.85679	1.38509	1.9952	1.71	2.12648	-1.02253	0.0288486	1	-	-	-	+	+	+	Intron (XM_026439533.1/100577147, intron 1 of 2)	2204825	2290197	85373	+	100577147	XM_026439534.1
NC_037653.1	4776660	4777616	4776887;4777380;4777282;4777368	47	163	127	87	53	137	160	137	340	125	266	100	3.05184	8.9462	5.96224	4.9984	2.78316	7.58586	8.80509	6.23898	17.3501	6.4386	13.5209	5.7065	0.341133	1.19283	0.366888	1.4113	2.6947	2.36939	-1.76832	0.0373443	1	-	-	-	+	+	+	Promoter (2-3kb)	4774155	4775589	1435	+	100577163	XM_016916939.2
NC_037647.1	4427724	4428569	4427964;4428326;4427940;4428006	16	98	82	96	23	126	104	101	364	112	292	98	1.08086	5.40045	3.86614	5.5096	1.23696	6.98119	5.74245	4.61142	18.5712	5.7743	14.8375	5.5935	0.200143	0.70171	0.177185	1.24527	3.21618	2.65263	-2.72093	0.0654429	1	-	-	-	+	+	+	Promoter (2-3kb)	4385173	4430815	45643	-	100577188	XM_026443349.1
NC_037639.1	7811199	7812443	7811296;7811649;7812225;7811659;7812103;7812023	78	168	164	127	87	133	194	133	322	127	312	120	5.02282	9.21895	7.6857	7.2704	4.53552	7.36598	10.6646	6.05814	16.4342	6.5408	15.8503	6.8365	0.544836	1.05712	0.615739	1.76038	2.51257	2.31848	-1.57153	0.00822064	1	-	-	-	+	+	+	Promoter (1-2kb)	7814438	7838151	23714	+	100577268	XM_006563745.3
NC_037644.1	3524944	3526606	3525270;3526230;3525245;3525855;3526271;3525297	74	203	235	184	106	154	213	207	592	191	656	185	4.7685	11.1282	10.9929	10.508	5.51478	8.52035	11.7037	9.40368	30.1718	9.8112	33.2705	10.509	0.428506	1.04615	0.647248	1.24459	3.07524	3.16591	-1.81879	0.0939762	1	-	-	-	+	+	+	Distal Intergenic	3512949	3513823	875	-	100577341	XM_003249707.4
NC_037643.1	7204411	7205740	7204594;7205012;7205387;7204607;7205318	41	185	171	152	46	159	153	165	359	164	293	177	2.67036	10.1463	8.01176	8.6904	2.42238	8.7952	8.42226	7.50486	18.3168	8.4315	14.8882	10.057	0.263186	0.921909	0.275421	1.12224	2.17242	1.48038	-1.70904	0.0488641	1	-	-	-	+	+	+	Promoter (1-2kb)	7202698	7203957	1260	+	100577360	XR_120158.4
NC_037650.1	2439689	2440610	2440313;2440298;2440246	40	90	38	76	44	97	109	95	659	101	777	112	2.60678	4.96405	1.81662	4.3736	2.3193	5.38706	6.0159	4.34016	33.5808	5.2122	39.3979	6.3845	0.525132	0.41536	0.430532	1.3861	6.44273	6.17087	-3.35207	0.12434	1	-	-	-	+	+	+	Promoter (<=1kb)	2433888	2440484	6597	-	100577367	XM_016915889.2
NC_037643.1	16371511	16371835	16371663;16371656;16371687	18	46	43	55	54	58	103	62	81	41	88	38	1.20802	2.56385	2.04952	3.1808	2.8347	3.24323	5.68776	2.84823	4.17216	2.1462	4.50696	2.2035	0.471174	0.644341	0.874036	1.99695	1.94398	2.04536	-1.58922	0.00522314	1	-	-	-	+	+	+	Promoter (<=1kb)	16371003	16372487	1485	-	100577373	XR_001703498.2
NC_037647.1	4435240	4435656	4435432;4435464;4435434	17	70	100	59	33	48	117	71	167	45	189	61	1.14444	3.87305	4.70458	3.408	1.75236	2.69353	6.45342	3.25512	8.54784	2.3506	9.6216	3.503	0.295488	1.38045	0.650581	1.98254	3.63645	2.74667	-1.84631	0.030993	1	-	-	-	+	+	+	Promoter (<=1kb)	4434994	4483388	48395	+	100577407	XR_001704396.2
NC_037641.1	7611275	7612069	7611662;7611738;7611816	63	80	96	109	91	97	286	127	206	96	270	91	4.06912	4.41855	4.51826	6.248	4.74168	5.38706	15.696	5.78688	10.5322	4.9567	13.7234	5.198	0.920917	0.723153	0.880198	2.71234	2.12484	2.64013	-1.56665	0.00740655	1	-	-	-	+	+	+	Promoter (1-2kb)	7609057	7610025	969	-	100577527	XM_003250091.4
NC_037640.1	3155878	3156583	3156037;3156325;3156260;3156226	39	88	141	102	56	103	137	97	271	102	212	66	2.5432	4.85495	6.61436	5.8504	2.93778	5.71688	7.54722	4.43058	13.8394	5.2633	10.7863	3.7855	0.523836	1.13058	0.513878	1.70344	2.62942	2.84937	-1.72787	0.0227612	1	-	-	-	+	+	+	Intron (XM_003249256.4/100577638, intron 1 of 3)	3145209	3170358	25150	-	100577638	XM_003249256.4
NC_037648.1	10530142	10530543	10530366;10530362;10530354	35	46	87	53	30	31	120	54	155	48	163	42	2.28888	2.56385	4.09904	3.0672	1.59774	1.75904	6.61749	2.48655	7.93728	2.5039	8.30496	2.4295	0.892751	1.33641	0.908302	2.66131	3.16997	3.41838	-1.5598	0.00280852	1	-	-	-	+	+	+	Promoter (<=1kb)	10530837	10531852	1016	+	100577699	XM_003250404.3
NC_037638.1	1063255	1064111	1063513;1063620;1064036;1063938	92	145	200	108	75	121	229	118	165	90	196	70	5.91294	7.9643	9.36258	6.1912	3.91704	6.70634	12.5787	5.37999	8.44608	4.6501	9.97608	4.0115	0.742431	1.51224	0.58408	2.33805	1.81632	2.48687	-1.2262	0.0269664	1	-	-	-	+	+	+	Exon (XM_026439854.1/726886, exon 4 of 8)	1071171	1074278	3108	+	100577848	XR_407459.3
NC_037645.1	8326917	8327570	8327052;8327091;8327228	48	79	85	84	26	57	102	75	142	76	130	71	3.11542	4.364	4.00588	4.828	1.39158	3.18826	5.63307	3.43596	7.27584	3.9347	6.63384	4.068	0.713891	0.829718	0.43647	1.63945	1.84915	1.63074	-1.3704	0.00324439	1	-	-	-	+	+	+	Intron (XM_003250440.4/100577901, intron 1 of 4)	8325100	8331073	5974	-	100577901	XM_003250440.4
NC_037651.1	2099841	2100198	2099984;2100041;2100077	14	66	104	52	18	38	101	68	115	54	107	47	0.9537	3.65485	4.8909	3.0104	0.97926	2.14383	5.57838	3.11949	5.90208	2.8105	5.46912	2.712	0.260941	1.62467	0.456781	1.78823	2.10001	2.01664	-1.33393	0.101894	1	-	-	-	+	+	+	Intron (XR_001705518.2/100577945, intron 3 of 13)	2087221	2359217	271997	+	100577945	XR_001705519.2
NC_037649.1	11494918	11495506	11495117;11495177;11495313	71	91	135	89	88	62	154	92	196	70	152	74	4.57776	5.0186	6.33488	5.112	4.58706	3.46311	8.47695	4.20453	10.0234	3.6281	7.74792	4.2375	0.912159	1.23922	1.32455	2.01615	2.76271	1.82842	-0.926659	0.050224	1	-	-	-	+	+	+	Intron (XM_391935.7/408387, intron 3 of 6)	11477045	11484980	7936	-	100578121	XM_003250916.4
NC_037642.1	9808867	9810207	9809453;9809073;9809532;9810017;9809573	49	142	188	127	76	171	221	202	403	131	372	161	3.179	7.80065	8.80362	7.2704	3.96858	9.45484	12.1412	9.17763	20.5555	6.7452	18.8887	9.153	0.40753	1.21089	0.419741	1.32291	3.04743	2.06366	-1.65845	0.0797727	1	-	-	-	+	+	+	Promoter (2-3kb)	9806231	9807510	1280	+	100578193	XM_003251065.4
NC_037653.1	4533371	4533846	4533534;4533627;4533537	54	65	132	61	49	56	159	72	125	78	107	61	3.4969	3.6003	6.19514	3.5216	2.577	3.13329	8.7504	3.30033	6.41088	4.0369	5.46912	3.503	0.97128	1.75918	0.822458	2.65137	1.58807	1.56127	-0.707223	0.18315	1	-	-	-	+	+	+	Downstream (1-2kb)	4522527	4528139	5613	+	100578237	XM_006561407.3
NC_037648.1	5123580	5124156	5123796;5123818;5123970	26	44	53	60	7	52	201	70	201	64	200	42	1.71666	2.45475	2.51532	3.4648	0.41232	2.91341	11.0474	3.20991	10.2778	3.3215	10.1786	2.4295	0.699322	0.725964	0.141525	3.44165	3.09432	4.18959	-2.77515	0.00290456	1	-	-	-	+	+	+	Exon (XM_026443562.1/726770, exon 6 of 8)	5144147	5249415	105269	+	100578332	XM_026443792.1
NC_037640.1	2802064	2802787	2802194;2802492;2802647	42	110	106	78	46	82	121	99	146	100	159	77	2.73394	6.05505	4.98406	4.4872	2.42238	4.56251	6.67218	4.521	7.47936	5.1611	8.1024	4.407	0.451514	1.11073	0.530931	1.47582	1.44918	1.83853	-1.18634	0.0300492	1	-	-	-	+	+	+	3' UTR	2806167	2807147	981	+	100578418	XM_016911305.2
[truncated: 155 more rows]
[truncated: 5 more columns]
