# Supplementary material for: The diverging epigenomic landscapes of honeybee queens and workers revealed by multiomic sequencing
Source: Research Square preprint supplement (doi:10.21203/rs.3.rs-1629662/v1), 2022-05-11
Supplement: Supplementary file 3 [file 31cce3cf99e68df0646aa1db.xlsx]

## Sheet: 2Qvs2W（AtoB）
Chr	binstart	binend	score
NC_037638.1	15900000	16000000	-0.0004116
NC_037638.1	16000000	16100000	-0.00240577
NC_037639.1	3600000	3700000	-0.0298758
NC_037639.1	3700000	3800000	-0.0353142
NC_037639.1	4000000	4100000	-0.03219
NC_037639.1	4100000	4200000	-0.0194452
NC_037639.1	4200000	4300000	-0.0203841
NC_037639.1	5200000	5300000	-0.014228
NC_037639.1	5400000	5500000	-0.00914548
NC_037639.1	5700000	5800000	-0.0126788
NC_037639.1	5800000	5900000	-0.0178124
NC_037639.1	5900000	6000000	-0.0253924
NC_037639.1	6100000	6200000	-0.00853827
NC_037640.1	6000000	6100000	-0.00689307
NC_037640.1	10000000	10100000	-0.00586989
NC_037641.1	9800000	9900000	-0.00698969
NC_037642.1	1900000	2000000	-0.00701635
NC_037643.1	0	100000	-0.0179483
NC_037643.1	12300000	12400000	-0.000882403
NC_037643.1	12400000	12500000	-0.00480779
NC_037643.1	12600000	12700000	-0.00386394
NC_037644.1	3800000	3900000	-0.0107584
NC_037644.1	3900000	4000000	-0.0117551
NC_037644.1	4000000	4100000	-0.0114332
NC_037644.1	4100000	4200000	-0.0168973
NC_037644.1	4300000	4400000	-0.0210508
NC_037644.1	4500000	4600000	-0.0138456
NC_037644.1	4600000	4700000	-0.0107202
NC_037645.1	3900000	4000000	-0.00563368
NC_037645.1	9500000	9600000	-0.00387117
NC_037646.1	2100000	2200000	-0.0166342
NC_037646.1	2200000	2300000	-0.0165655
NC_037646.1	2900000	3000000	-0.000889546
NC_037646.1	3000000	3100000	-0.0416971
NC_037646.1	3100000	3200000	-0.106424
NC_037646.1	3200000	3300000	-0.105247
NC_037646.1	3300000	3400000	-0.106295
NC_037646.1	3400000	3500000	-0.0968955
NC_037646.1	3500000	3600000	-0.104
NC_037646.1	3600000	3700000	-0.10957
NC_037646.1	3700000	3800000	-0.107767
NC_037646.1	3800000	3900000	-0.0906198
NC_037646.1	3900000	4000000	-0.0796325
NC_037646.1	4000000	4100000	-0.11147
NC_037646.1	4100000	4200000	-0.123825
NC_037646.1	4200000	4300000	-0.141745
NC_037646.1	4300000	4400000	-0.137487
NC_037646.1	4400000	4500000	-0.134818
NC_037646.1	4500000	4600000	-0.137033
NC_037646.1	4600000	4700000	-0.14075
NC_037646.1	4700000	4800000	-0.140459
NC_037646.1	4800000	4900000	-0.140997
NC_037646.1	4900000	5000000	-0.13479
NC_037646.1	5000000	5100000	-0.12116
NC_037646.1	5100000	5200000	-0.122366
NC_037646.1	5200000	5300000	-0.124087
NC_037646.1	5300000	5400000	-0.11108
NC_037646.1	5400000	5500000	-0.0420288
NC_037646.1	5500000	5600000	-0.033334
NC_037646.1	5600000	5700000	-0.0813659
NC_037646.1	6000000	6100000	-0.0117381
NC_037646.1	6100000	6200000	-0.0754799
NC_037646.1	6200000	6300000	-0.0820502
NC_037646.1	6300000	6400000	-0.0762495
NC_037646.1	6600000	6700000	-0.00643264
NC_037646.1	6700000	6800000	-0.0114003
NC_037646.1	7000000	7100000	-0.0470085
NC_037646.1	7100000	7200000	-0.11859
NC_037646.1	7200000	7300000	-0.124135
NC_037646.1	7300000	7400000	-0.0739307
NC_037646.1	8000000	8100000	-0.103914
NC_037646.1	8100000	8200000	-0.109724
NC_037646.1	8200000	8300000	-0.0426835
NC_037646.1	8300000	8400000	-0.0218036
NC_037646.1	8400000	8500000	-0.00677333
NC_037646.1	8500000	8600000	-0.0193999
NC_037646.1	8800000	8900000	-0.063565
NC_037646.1	8900000	9000000	-0.133571
NC_037646.1	9000000	9100000	-0.134667
NC_037646.1	9100000	9200000	-0.132008
NC_037646.1	9200000	9300000	-0.131977
NC_037646.1	9300000	9400000	-0.130458
NC_037646.1	9400000	9500000	-0.117816
NC_037646.1	9500000	9600000	-0.097781
NC_037646.1	9600000	9700000	-0.118146
NC_037646.1	9700000	9800000	-0.115227
NC_037646.1	9800000	9900000	-0.125997
NC_037646.1	9900000	10000000	-0.126642
NC_037646.1	10000000	10100000	-0.100923
NC_037646.1	10100000	10200000	-0.108807
NC_037646.1	10200000	10300000	-0.130458
NC_037646.1	10300000	10400000	-0.131054
NC_037646.1	10400000	10500000	-0.134315
NC_037646.1	10500000	10600000	-0.132675
NC_037646.1	10600000	10700000	-0.0327805
NC_037646.1	11600000	11700000	-0.0130938
NC_037646.1	11900000	12000000	-0.0503214
NC_037646.1	12000000	12100000	-0.04714
NC_037646.1	12100000	12200000	-0.129071
NC_037646.1	12200000	12300000	-0.0461697
NC_037647.1	4900000	5000000	-0.0136996
NC_037648.1	7200000	7300000	-0.00275194
NC_037648.1	8000000	8100000	-0.0109039
NC_037648.1	14600000	14700000	-0.00363825
NC_037649.1	2600000	2700000	-0.0188561
NC_037649.1	4200000	4300000	-0.00558695
NC_037649.1	9000000	9100000	-0.00478133
NC_037649.1	9100000	9200000	-0.0136024
NC_037651.1	1100000	1200000	-0.00693143
NC_037652.1	900000	1000000	-0.0211919
NC_037652.1	2000000	2100000	-0.000492389
NC_037653.1	0	100000	-0.152218
NC_037653.1	100000	200000	-0.152818
NC_037653.1	200000	300000	-0.13732
NC_037653.1	300000	400000	-0.137225
NC_037653.1	400000	500000	-0.133992
NC_037653.1	500000	600000	-0.125106
NC_037653.1	1800000	1900000	-0.0402914
NC_037653.1	1900000	2000000	-0.0210716
NC_037653.1	2000000	2100000	-0.116761
NC_037653.1	2100000	2200000	-0.167624
NC_037653.1	2200000	2300000	-0.166211
NC_037653.1	2300000	2400000	-0.169893
NC_037653.1	2400000	2500000	-0.112741
NC_037653.1	3200000	3300000	-0.091898
NC_037653.1	3300000	3400000	-0.103266
NC_037653.1	3400000	3500000	-0.10164
NC_037653.1	3500000	3600000	-0.0950079
NC_037653.1	3600000	3700000	-0.0976423
NC_037653.1	3700000	3800000	-0.103981
NC_037653.1	3800000	3900000	-0.139193
NC_037653.1	3900000	4000000	-0.142065
NC_037653.1	4000000	4100000	-0.154874
NC_037653.1	4100000	4200000	-0.153015
NC_037653.1	4200000	4300000	-0.12365
NC_037653.1	4400000	4500000	-0.131735
NC_037653.1	4700000	4800000	-0.00796867
NC_037653.1	5300000	5400000	-0.138573
NC_037653.1	5400000	5500000	-0.170912
NC_037653.1	5500000	5600000	-0.167198
NC_037653.1	5600000	5700000	-0.166238
NC_037653.1	5700000	5800000	-0.161778
NC_037653.1	5800000	5900000	-0.120311
NC_037653.1	5900000	6000000	-0.106315
NC_037653.1	6000000	6100000	-0.157689
NC_037653.1	6100000	6200000	-0.156504
NC_037653.1	6200000	6300000	-0.0794904
NC_037653.1	6300000	6400000	-0.0930156
NC_037653.1	6700000	6800000	-0.0592894
NC_037653.1	6800000	6900000	-0.161034
NC_037653.1	6900000	7000000	-0.121896

## Sheet: 2Qvs2W（BtoA）
Chr	binstart	binend	score
NC_037639.1	9400000	9500000	0.00748842
NC_037639.1	13300000	13400000	0.00249783
NC_037639.1	14500000	14600000	0.0118055
NC_037639.1	15700000	15800000	0.0134472
NC_037640.1	3300000	3400000	0.015896
NC_037640.1	12700000	12800000	0.00665716
NC_037640.1	13000000	13100000	0.00470818
NC_037640.1	13100000	13200000	0.00499608
NC_037641.1	1700000	1800000	0.0024356
NC_037641.1	2600000	2700000	0.00638974
NC_037641.1	4600000	4700000	0.00970898
NC_037641.1	5200000	5300000	0.00500431
NC_037641.1	7800000	7900000	0.0160263
NC_037641.1	10000000	10100000	0.00500994
NC_037642.1	8900000	9000000	0.00436128
NC_037643.1	6900000	7000000	0.00396992
NC_037646.1	100000	200000	0.0272072
NC_037646.1	300000	400000	0.0805429
NC_037646.1	500000	600000	0.0858419
NC_037646.1	600000	700000	0.0680242
NC_037646.1	700000	800000	0.0581633
NC_037646.1	1000000	1100000	0.0768362
NC_037646.1	1100000	1200000	0.0839971
NC_037646.1	1300000	1400000	0.0959242
NC_037646.1	1400000	1500000	0.08935
NC_037646.1	1500000	1600000	0.125037
NC_037646.1	1600000	1700000	0.121494
NC_037646.1	1800000	1900000	0.0643483
NC_037646.1	1900000	2000000	0.0691775
NC_037646.1	2400000	2500000	0.00565408
NC_037646.1	2500000	2600000	0.0302622
NC_037646.1	2600000	2700000	0.022315
NC_037646.1	2700000	2800000	0.0881908
NC_037646.1	5800000	5900000	0.105271
NC_037646.1	5900000	6000000	0.0489266
NC_037646.1	6400000	6500000	0.0582441
NC_037646.1	6500000	6600000	0.121222
NC_037646.1	6800000	6900000	0.0513158
NC_037646.1	7400000	7500000	0.0922112
NC_037646.1	7500000	7600000	0.121299
NC_037646.1	7600000	7700000	0.0670783
NC_037646.1	7700000	7800000	0.13225
NC_037646.1	7800000	7900000	0.130933
NC_037646.1	7900000	8000000	0.0262252
NC_037646.1	8600000	8700000	0.0592734
NC_037646.1	8700000	8800000	0.0414188
NC_037646.1	10700000	10800000	0.0346243
NC_037646.1	10800000	10900000	0.0853514
NC_037646.1	10900000	11000000	0.118177
NC_037646.1	11000000	11100000	0.115135
NC_037646.1	11100000	11200000	0.081058
NC_037646.1	11200000	11300000	0.0647381
NC_037646.1	11300000	11400000	0.0999452
NC_037646.1	11400000	11500000	0.116404
NC_037646.1	11500000	11600000	0.0437808
NC_037646.1	11700000	11800000	0.0307363
NC_037646.1	11800000	11900000	0.0189441
NC_037646.1	12300000	12354651	0.0863842
NC_037647.1	7000000	7100000	0.00163318
NC_037647.1	9600000	9700000	0.0072875
NC_037648.1	12000000	12100000	0.00203072
NC_037649.1	1100000	1200000	0.0109618
NC_037650.1	900000	1000000	0.00957681
NC_037650.1	1200000	1300000	0.0168745
NC_037650.1	1300000	1400000	0.0260206
NC_037650.1	8300000	8400000	0.0081328
NC_037650.1	11200000	11279722	0.0135064
NC_037651.1	2800000	2900000	0.0210394
NC_037653.1	600000	700000	0.0213999
NC_037653.1	700000	800000	0.144575
NC_037653.1	800000	900000	0.11162
NC_037653.1	900000	1000000	0.0719384
NC_037653.1	1000000	1100000	0.11321
NC_037653.1	1100000	1200000	0.150176
NC_037653.1	1200000	1300000	0.166961
NC_037653.1	1300000	1400000	0.0610923
NC_037653.1	1400000	1500000	0.0966721
NC_037653.1	1500000	1600000	0.076282
NC_037653.1	1600000	1700000	0.0516443
NC_037653.1	2600000	2700000	0.116569
NC_037653.1	2700000	2800000	0.151456
NC_037653.1	2800000	2900000	0.11357
NC_037653.1	2900000	3000000	0.132333
NC_037653.1	3000000	3100000	0.151396
NC_037653.1	3100000	3200000	0.125143
NC_037653.1	4500000	4600000	0.0419994
NC_037653.1	4600000	4700000	0.0526773
NC_037653.1	4800000	4900000	0.147875
NC_037653.1	4900000	5000000	0.143773
NC_037653.1	5000000	5100000	0.0713953
NC_037653.1	5100000	5200000	0.105255
NC_037653.1	5200000	5300000	0.130317
NC_037653.1	6400000	6500000	0.0313863
NC_037653.1	6600000	6700000	0.0632927
NC_037653.1	7000000	7100000	0.0591528
NC_037653.1	7100000	7200000	0.0895774

## Sheet: 4Qvs4W（AtoB）
Chr	binstart	binend	score
NC_037638.1	15900000	16000000	-0.0106966
NC_037638.1	16000000	16100000	-0.0125992
NC_037639.1	3500000	3600000	-0.00995073
NC_037639.1	3600000	3700000	-0.0360951
NC_037639.1	3700000	3800000	-0.0328201
NC_037639.1	4100000	4200000	-0.0130369
NC_037639.1	4900000	5000000	-0.0568681
NC_037639.1	5000000	5100000	-0.0785503
NC_037639.1	5100000	5200000	-0.0673627
NC_037639.1	5200000	5300000	-0.0246051
NC_037639.1	5400000	5500000	-0.0348821
NC_037639.1	5700000	5800000	-0.014885
NC_037639.1	5800000	5900000	-0.0249987
NC_037639.1	5900000	6000000	-0.00426254
NC_037639.1	6000000	6100000	-0.0597561
NC_037639.1	6100000	6200000	-0.0404003
NC_037639.1	7000000	7100000	-0.0753378
NC_037639.1	7100000	7200000	-0.105468
NC_037639.1	7200000	7300000	-0.114762
NC_037639.1	7300000	7400000	-0.118489
NC_037639.1	7400000	7500000	-0.119828
NC_037639.1	7500000	7600000	-0.118599
NC_037639.1	7600000	7700000	-0.118563
NC_037639.1	7700000	7800000	-0.103351
NC_037639.1	7800000	7900000	-0.0761614
NC_037639.1	7900000	8000000	-0.120964
NC_037639.1	8000000	8100000	-0.121851
NC_037639.1	8100000	8200000	-0.0768386
NC_037639.1	8200000	8300000	-0.113123
NC_037639.1	8300000	8400000	-0.105815
NC_037639.1	8400000	8500000	-0.105888
NC_037639.1	8500000	8600000	-0.10891
NC_037639.1	8600000	8700000	-0.114437
NC_037639.1	8700000	8800000	-0.119833
NC_037639.1	8800000	8900000	-0.120144
NC_037639.1	8900000	9000000	-0.122818
NC_037639.1	9000000	9100000	-0.112331
NC_037639.1	9100000	9200000	-0.123836
NC_037639.1	9200000	9300000	-0.125328
NC_037639.1	9300000	9400000	-0.0804089
NC_037639.1	9700000	9800000	-0.113803
NC_037639.1	9800000	9900000	-0.122838
NC_037639.1	9900000	10000000	-0.0783645
NC_037639.1	10000000	10100000	-0.102157
NC_037639.1	10100000	10200000	-0.0195049
NC_037639.1	10500000	10600000	-0.00743656
NC_037639.1	10600000	10700000	-0.0915486
NC_037639.1	10700000	10800000	-0.0948669
NC_037639.1	10800000	10900000	-0.0635989
NC_037639.1	10900000	11000000	-0.0386914
NC_037639.1	11000000	11100000	-0.061745
NC_037639.1	11100000	11200000	-0.0989986
NC_037639.1	11200000	11300000	-0.0202291
NC_037639.1	11300000	11400000	-0.0626031
NC_037639.1	11400000	11500000	-0.125136
NC_037639.1	11500000	11600000	-0.0848351
NC_037639.1	11600000	11700000	-0.110629
NC_037639.1	11700000	11800000	-0.0792556
NC_037639.1	11800000	11900000	-0.065882
NC_037639.1	11900000	12000000	-0.119046
NC_037639.1	12000000	12100000	-0.118822
NC_037639.1	12100000	12200000	-0.0276485
NC_037639.1	12300000	12400000	-0.0387331
NC_037639.1	12400000	12500000	-0.0624699
NC_037639.1	12500000	12600000	-0.00893042
NC_037639.1	12600000	12700000	-0.0604616
NC_037639.1	12700000	12800000	-0.111939
NC_037639.1	12800000	12900000	-0.125883
NC_037639.1	12900000	13000000	-0.124784
NC_037639.1	13000000	13100000	-0.12125
NC_037639.1	13100000	13200000	-0.0997844
NC_037639.1	13200000	13300000	-0.0386248
NC_037639.1	13400000	13500000	-0.0178232
NC_037639.1	13500000	13600000	-0.107419
NC_037639.1	13600000	13700000	-0.0780444
NC_037639.1	13900000	14000000	-0.0620055
NC_037639.1	14000000	14100000	-0.0221554
NC_037639.1	14300000	14400000	-0.0390551
NC_037639.1	14400000	14500000	-0.0295209
NC_037640.1	2000000	2100000	-0.0296323
NC_037640.1	2200000	2300000	-0.0173452
NC_037641.1	400000	500000	-0.000769165
NC_037641.1	4600000	4700000	-0.0062621
NC_037642.1	5900000	6000000	-0.00247838
NC_037642.1	6000000	6100000	-0.0559164
NC_037642.1	6200000	6300000	-0.0539427
NC_037642.1	6300000	6400000	-0.0406363
NC_037642.1	6400000	6500000	-0.0324349
NC_037642.1	7500000	7600000	-0.00230197
NC_037642.1	7700000	7800000	-0.0103876
NC_037642.1	7800000	7900000	-0.0284105
NC_037642.1	8100000	8200000	-0.0403142
NC_037642.1	8800000	8900000	-0.00896916
NC_037642.1	10100000	10200000	-0.0232397
NC_037642.1	10200000	10300000	-0.0147419
NC_037642.1	10500000	10600000	-0.00766471
NC_037643.1	11200000	11300000	-0.0391468
NC_037643.1	12300000	12400000	-0.0491924
NC_037643.1	12400000	12500000	-0.0549752
NC_037643.1	12500000	12600000	-0.0532056
NC_037643.1	12600000	12700000	-0.0505429
NC_037643.1	12700000	12800000	-0.0365162
NC_037643.1	12800000	12900000	-0.00327529
NC_037643.1	17300000	17400000	-0.0143847
NC_037643.1	17400000	17500000	-0.0298324
NC_037643.1	17500000	17600000	-0.0336313
NC_037643.1	17600000	17700000	-0.0304689
NC_037643.1	17700000	17789102	-0.00938705
NC_037645.1	9300000	9400000	-0.00421803
NC_037645.1	9800000	9900000	-0.0146123
NC_037647.1	12300000	12360052	-0.0273225
NC_037648.1	8100000	8200000	-0.00578203
NC_037648.1	8800000	8900000	-0.0153098
NC_037648.1	11100000	11200000	-0.0185396
NC_037648.1	12000000	12100000	-0.00485066
NC_037648.1	12500000	12600000	-0.0265983
NC_037648.1	12600000	12700000	-0.0112975
NC_037648.1	13000000	13100000	-0.00814658
NC_037648.1	14700000	14800000	-0.00526805
NC_037649.1	1000000	1100000	-0.0012903
NC_037649.1	1100000	1200000	-0.0173161
NC_037649.1	1200000	1300000	-0.00843313
NC_037649.1	1300000	1400000	-0.0167691
NC_037650.1	5700000	5800000	-0.00166306
NC_037650.1	11200000	11279722	-0.0235929
NC_037652.1	200000	300000	-0.129661
NC_037652.1	300000	400000	-0.0991562
NC_037652.1	400000	500000	-0.0608215
NC_037652.1	500000	600000	-0.0378175
NC_037652.1	2000000	2100000	-0.0254435
NC_037652.1	2800000	2900000	-0.0498928
NC_037652.1	2900000	3000000	-0.156737
NC_037652.1	3000000	3100000	-0.141577
NC_037652.1	3100000	3200000	-0.14083
NC_037652.1	3200000	3300000	-0.0911203
NC_037652.1	3300000	3400000	-0.141959
NC_037652.1	3400000	3500000	-0.0567362
NC_037652.1	3900000	4000000	-0.155687
NC_037652.1	4000000	4100000	-0.164171
NC_037652.1	4100000	4200000	-0.161441
NC_037652.1	4200000	4300000	-0.159157
NC_037652.1	4300000	4400000	-0.126083
NC_037652.1	4400000	4500000	-0.145945
NC_037652.1	4500000	4600000	-0.147332
NC_037652.1	4600000	4700000	-0.135476
NC_037652.1	4700000	4800000	-0.115595
NC_037652.1	4800000	4900000	-0.158603
NC_037652.1	4900000	5000000	-0.153681
NC_037652.1	5000000	5100000	-0.129009
NC_037652.1	5300000	5400000	-0.0413845
NC_037652.1	5400000	5500000	-0.0113749
NC_037652.1	5900000	6000000	-0.0622474
NC_037652.1	6000000	6100000	-0.160269
NC_037652.1	6100000	6200000	-0.155657
NC_037652.1	6200000	6300000	-0.0863883
NC_037652.1	6300000	6400000	-0.10563
NC_037652.1	6400000	6500000	-0.0555825
NC_037652.1	6500000	6600000	-0.0537585
NC_037652.1	6600000	6700000	-0.153837
NC_037652.1	6700000	6800000	-0.157818
NC_037652.1	6800000	6900000	-0.141783
NC_037652.1	7000000	7100000	-0.0405473
NC_037652.1	7100000	7200000	-0.0584763
NC_037652.1	8000000	8100000	-0.0346482
NC_037652.1	8100000	8200000	-0.0748303
NC_037652.1	8200000	8300000	-0.11007
NC_037652.1	8300000	8400000	-0.122865
NC_037652.1	8400000	8500000	-0.15534
NC_037652.1	8500000	8600000	-0.152631
NC_037652.1	8600000	8700000	-0.15695
NC_037652.1	8700000	8800000	-0.127824
NC_037652.1	8900000	9000000	-0.0370567
NC_037652.1	9100000	9200000	-0.119347
NC_037652.1	9200000	9300000	-0.121308
NC_037653.1	6400000	6500000	-0.0103685

## Sheet: 4Qvs4W（BtoA）
Chr	binstart	binend	score
NC_037639.1	0	100000	0.0881829
NC_037639.1	100000	200000	0.116168
NC_037639.1	200000	300000	0.0837756
NC_037639.1	300000	400000	0.0927826
NC_037639.1	400000	500000	0.0418851
NC_037639.1	500000	600000	0.0688075
NC_037639.1	700000	800000	0.100634
NC_037639.1	800000	900000	0.0849081
NC_037639.1	900000	1000000	0.0904957
NC_037639.1	1000000	1100000	0.100748
NC_037639.1	1300000	1400000	0.0613679
NC_037639.1	1400000	1500000	0.0713575
NC_037639.1	1500000	1600000	0.0751127
NC_037639.1	1600000	1700000	0.104857
NC_037639.1	1700000	1800000	0.110415
NC_037639.1	1800000	1900000	0.086973
NC_037639.1	2000000	2100000	0.109048
NC_037639.1	2100000	2200000	0.0861093
NC_037639.1	2300000	2400000	0.0596545
NC_037639.1	2400000	2500000	0.0825511
NC_037639.1	2500000	2600000	0.0786101
NC_037639.1	2600000	2700000	0.0143112
NC_037639.1	2700000	2800000	0.0050926
NC_037639.1	2800000	2900000	0.0817551
NC_037639.1	2900000	3000000	0.0680476
NC_037639.1	3000000	3100000	0.0470087
NC_037639.1	3100000	3200000	0.0329921
NC_037639.1	3200000	3300000	0.0299975
NC_037639.1	3300000	3400000	0.0337475
NC_037639.1	3400000	3500000	0.0506296
NC_037639.1	3800000	3900000	0.0294571
NC_037639.1	3900000	4000000	0.0806342
NC_037639.1	4200000	4300000	0.00502637
NC_037639.1	4300000	4400000	0.0715641
NC_037639.1	4400000	4500000	0.0977772
NC_037639.1	4500000	4600000	0.113129
NC_037639.1	4600000	4700000	0.0986628
NC_037639.1	4700000	4800000	0.051947
NC_037639.1	4800000	4900000	0.0550607
NC_037639.1	5300000	5400000	0.00910313
NC_037639.1	5500000	5600000	0.0284119
NC_037639.1	5600000	5700000	0.0425937
NC_037639.1	6200000	6300000	0.0909258
NC_037639.1	6300000	6400000	0.113424
NC_037639.1	6400000	6500000	0.0781226
NC_037639.1	6500000	6600000	0.0827519
NC_037639.1	6600000	6700000	0.0146606
NC_037639.1	6700000	6800000	0.0365838
NC_037639.1	6800000	6900000	0.0359351
NC_037639.1	6900000	7000000	0.0721151
NC_037639.1	9400000	9500000	0.0697997
NC_037639.1	9500000	9600000	0.0771692
NC_037639.1	9600000	9700000	0.0775738
NC_037639.1	10200000	10300000	0.0890453
NC_037639.1	10300000	10400000	0.0815083
NC_037639.1	10400000	10500000	0.0324526
NC_037639.1	13300000	13400000	0.0448474
NC_037639.1	13700000	13800000	0.066743
NC_037639.1	13800000	13900000	0.0361643
NC_037639.1	14200000	14300000	0.0536206
NC_037639.1	14500000	14600000	0.0284457
NC_037639.1	14600000	14700000	0.0731109
NC_037639.1	14700000	14800000	0.0907367
NC_037639.1	14800000	14900000	0.0913676
NC_037639.1	14900000	15000000	0.0711026
NC_037639.1	15000000	15100000	0.0879465
NC_037639.1	15100000	15200000	0.0899438
NC_037639.1	15200000	15300000	0.0685507
NC_037639.1	15400000	15500000	0.0420454
NC_037639.1	15500000	15600000	0.087111
NC_037639.1	15600000	15700000	0.048262
NC_037639.1	15700000	15800000	0.0264096
NC_037639.1	15800000	15900000	0.0952611
NC_037639.1	15900000	16000000	0.104188
NC_037639.1	16000000	16089512	0.0890744
NC_037640.1	5900000	6000000	0.0010209
NC_037640.1	9800000	9900000	0.0300569
NC_037640.1	10700000	10800000	0.020402
NC_037640.1	12200000	12300000	0.0202047
NC_037640.1	13100000	13200000	0.0179556
NC_037641.1	4900000	5000000	0.0165784
NC_037641.1	5200000	5300000	0.0247918
NC_037641.1	5300000	5400000	0.00819066
NC_037641.1	7800000	7900000	0.00302012
NC_037641.1	10000000	10100000	0.0131343
NC_037641.1	10100000	10200000	0.0041958
NC_037642.1	2900000	3000000	0.00308986
NC_037643.1	8100000	8200000	0.0152932
NC_037643.1	8700000	8800000	0.0159371
NC_037643.1	8800000	8900000	0.0170309
NC_037644.1	5300000	5400000	0.000437644
NC_037644.1	5400000	5500000	0.00577013
NC_037644.1	5500000	5600000	0.00804434
NC_037644.1	5600000	5700000	0.0168731
NC_037645.1	1200000	1300000	0.0351412
NC_037645.1	1300000	1400000	0.0145039
NC_037645.1	3500000	3600000	0.0156839
NC_037645.1	8300000	8400000	0.0199599
NC_037646.1	6800000	6900000	0.0267026
NC_037646.1	8400000	8500000	0.026683
NC_037647.1	3200000	3300000	0.020968
NC_037647.1	8200000	8300000	0.0225897
NC_037648.1	2300000	2400000	0.00412303
NC_037649.1	3400000	3500000	0.0373648
NC_037649.1	9000000	9100000	0.00339721
NC_037650.1	6100000	6200000	0.0457995
NC_037650.1	6300000	6400000	0.0338188
NC_037651.1	4800000	4900000	0.0173124
NC_037651.1	5500000	5600000	0.00552368
NC_037651.1	5800000	5900000	0.00022721
NC_037651.1	9400000	9500000	0.013109
NC_037652.1	600000	700000	0.0509979
NC_037652.1	700000	800000	0.0598823
NC_037652.1	900000	1000000	0.0559805
NC_037652.1	1200000	1300000	0.042059
NC_037652.1	1300000	1400000	0.0654365
NC_037652.1	1400000	1500000	0.115174
NC_037652.1	1500000	1600000	0.118554
NC_037652.1	1600000	1700000	0.069791
NC_037652.1	1700000	1800000	0.0790618
NC_037652.1	1800000	1900000	0.113541
NC_037652.1	1900000	2000000	0.0562267
NC_037652.1	2100000	2200000	0.0278689
NC_037652.1	2200000	2300000	0.069197
NC_037652.1	2300000	2400000	0.058706
NC_037652.1	2400000	2500000	0.0750281
NC_037652.1	2500000	2600000	0.114459
NC_037652.1	2600000	2700000	0.118929
NC_037652.1	2700000	2800000	0.131575
NC_037652.1	3500000	3600000	0.0211786
NC_037652.1	3600000	3700000	0.0880102
NC_037652.1	3700000	3800000	0.135142
NC_037652.1	3800000	3900000	0.0203333
NC_037652.1	5100000	5200000	0.00250312
NC_037652.1	5700000	5800000	0.0925773
NC_037652.1	5800000	5900000	0.07705
NC_037652.1	7200000	7300000	0.0665299
NC_037652.1	7300000	7400000	0.0493046
NC_037652.1	7400000	7500000	0.107686
NC_037652.1	7500000	7600000	0.0830518
NC_037652.1	7600000	7700000	0.0853271
NC_037652.1	7700000	7800000	0.122552
NC_037652.1	7800000	7900000	0.136723
NC_037652.1	7900000	8000000	0.0650501
NC_037652.1	9000000	9100000	0.0794106
NC_037652.1	9300000	9400000	0.13481
NC_037652.1	9400000	9500000	0.113867
NC_037653.1	600000	700000	0.0463487
NC_037653.1	1700000	1800000	0.0154398
NC_037653.1	2500000	2600000	0.0103531
