# Supplementary material for: The diverging epigenomic landscapes of honeybee queens and workers revealed by multiomic sequencing
Source: Research Square preprint supplement (doi:10.21203/rs.3.rs-1629662/v1), 2022-05-11
Supplement: Supplementary file 4 [file 6e42341efcf51c555b37c8bf.xlsx]

## Sheet: unique peaks for 2Q
Chromosome	PeakStart	PeakEnd	oriSummitPos	Count_2Q_1_AC	Count_2Q_1_In	Count_2Q_2_AC	Count_2Q_2_In	Count_2Q_3_AC	Count_2Q_3_In	Count_2W_1_AC	Count_2W_1_In	Count_2W_2_AC	Count_2W_2_In	Count_2W_3_AC	Count_2W_3_In	RPM_2Q_1_AC	RPM_2Q_1_In	RPM_2Q_2_AC	RPM_2Q_2_In	RPM_2Q_3_AC	RPM_2Q_3_In	RPM_2W_1_AC	RPM_2W_1_In	RPM_2W_2_AC	RPM_2W_2_In	RPM_2W_3_AC	RPM_2W_3_In	FoldEnrich_2Q_1_AC	FoldEnrich_2Q_2_AC	FoldEnrich_2Q_3_AC	FoldEnrich_2W_1_AC	FoldEnrich_2W_2_AC	FoldEnrich_2W_3_AC	log2foldchange	pvalue	qvalue	In_2Q_1_AC	In_2Q_2_AC	In_2Q_3_AC	In_2W_1_AC	In_2W_2_AC	In_2W_3_AC	annotation	geneStart	geneEnd	geneLength	geneStrand	geneId	transcriptId
NC_037653.1	3897959	3898345	3898138;3898142;3898168	126	48	134	44	162	23	94	50	67	61	96	85	5.95884	2.65727	6.3099	2.42775	8.05546	1.26888	4.3111	2.75604	3.95624	3.45154	4.47752	3.59136	2.24247	2.59907	6.34848	1.56424	1.14622	1.24675	1.49966	0.206869	1	+	+	+	-	-	-	Promoter (<=1kb)	3899323	4037081	137759	+	406077	XM_026445698.1
NC_037651.1	8046520	8046840	8046666;8046681;8046656	155	77	163	52	116	57	121	62	74	38	90	65	7.31952	4.22994	7.66536	2.85935	5.78214	3.06646	5.53636	3.40452	4.3635	2.17113	4.20056	2.75616	1.73041	2.68081	1.88561	1.62618	2.00978	1.52406	0.287245	0.334684	1	+	+	+	-	-	-	Promoter (1-2kb)	8044536	8058886	14351	+	408463	XM_392011.7
NC_037638.1	23322235	23322572	23322368;23322387;23322426	140	57	118	42	102	51	128	66	88	47	87	74	6.61572	3.14534	5.56206	2.31985	5.09026	2.74924	5.85402	3.62068	5.17802	2.67216	4.06208	3.132	2.10334	2.39759	1.85152	1.61683	1.93777	1.29696	0.388866	0.110481	1	+	+	+	-	-	-	Exon (XM_006571418.3/408646, exon 3 of 9)	23319490	23327025	7536	-	408646	XM_006571418.3
NC_037644.1	12700860	12701443	12701185;12701221;12701229	216	75	222	94	193	78	81	68	43	83	80	66	10.1816	4.12148	10.423	5.12525	9.58748	4.17673	3.72116	3.72876	2.55992	4.67628	3.73896	2.79792	2.47037	2.03366	2.29545	0.997962	0.547427	1.33634	1.23849	0.0139669	1	+	+	+	-	-	-	Intron (XM_016913010.2/408915, intron 1 of 8)	12538654	12708493	169840	-	408915	XM_016913010.2
NC_037647.1	9392818	9393139	9392965;9393002;9392992	95	50	100	27	93	11	65	41	50	44	82	57	4.50432	2.76573	4.72074	1.5106	4.64548	0.63444	2.99508	2.26968	2.96718	2.50515	3.83128	2.42208	1.62862	3.12508	7.32217	1.3196	1.18443	1.58181	1.56342	0.25816	1	+	+	+	-	-	-	Promoter (<=1kb)	9391895	9393150	1256	+	409552	XM_393059.7
NC_037647.1	10910788	10911123	10910923;10910981;10910965	147	61	128	58	134	49	85	25	86	53	84	90	6.94416	3.36226	6.02946	3.18305	6.6717	2.6435	3.90268	1.40504	5.06166	3.00618	3.9236	3.80016	2.06533	1.89424	2.52381	2.77763	1.68375	1.03248	0.238925	0.593414	1	+	+	+	-	-	-	Promoter (<=1kb)	10901732	10910479	8748	-	409649	XM_006566211.3
NC_037648.1	12735682	12736566	12735823;12736244;12736251;12736292;12736314	293	191	310	122	315	193	197	122	135	97	118	179	13.7945	10.4122	14.5361	6.63585	15.6167	10.2568	8.98524	6.64692	7.91248	5.45566	5.49304	7.5168	1.32484	2.19054	1.52257	1.35179	1.45032	0.730768	0.511991	0.221588	1	+	+	+	-	-	-	Distal Intergenic	12712072	12721511	9440	-	410334	XM_006566376.3
NC_037649.1	8247887	8248200	8248059;8248038;8248111	117	67	134	59	92	41	74	60	80	61	80	84	5.53656	3.68764	6.3099	3.237	4.59606	2.22054	3.4035	3.29644	4.71258	3.45154	3.73896	3.5496	1.50138	1.9493	2.06979	1.03248	1.36536	1.05335	0.677704	0.0363219	1	+	+	+	-	-	-	Intron (XM_016915492.2/410371, intron 2 of 13)	8222154	8260767	38614	-	410371	XM_016915493.2
NC_037653.1	7119851	7120320	7120077;7120026;7120030	149	61	127	54	163	30	108	56	96	65	86	77	7.038	3.36226	5.98272	2.96725	8.10488	1.63897	4.94642	3.08028	5.64346	3.67422	4.01592	3.25728	2.09323	2.01625	4.94511	1.60583	1.53596	1.23291	1.04946	0.245849	1	+	+	+	-	-	-	Intron (XM_016917003.2/410637, intron 2 of 21)	7037430	7129754	92325	-	410637	XM_016917003.2
NC_037644.1	13960965	13961359	13961181;13961160;13961182	178	82	147	60	234	46	109	61	71	68	89	83	8.39868	4.50109	6.91752	3.29095	11.6137	2.48489	4.9918	3.35048	4.18896	3.84123	4.1544	3.50784	1.86592	2.10198	4.67373	1.48988	1.09053	1.18432	1.19876	0.210637	1	+	+	+	-	-	-	Promoter (<=1kb)	13960959	13963652	2694	+	411187	XM_026441705.1
NC_037646.1	7962732	7963345	7963175;7963165;7963178	191	108	146	88	154	53	118	67	127	71	155	113	9.00864	5.91107	6.87078	4.80155	7.6601	2.85498	5.40022	3.67472	7.44704	4.00824	7.20096	4.76064	1.52403	1.43095	2.68307	1.46956	1.85793	1.5126	0.220159	0.583191	1	+	+	+	-	-	-	Intron (XM_006561741.3/411336, intron 4 of 12)	7920167	7990380	70214	-	411336	XM_006561740.3
NC_037640.1	7778982	7779361	7779187;7779191;7779177	93	34	118	38	132	35	79	52	69	43	53	71	4.41048	1.89805	5.56206	2.10405	6.57286	1.90332	3.6304	2.86412	4.0726	2.44948	2.49264	3.00672	2.32369	2.6435	3.45337	1.26754	1.66264	0.829023	1.16349	0.02365	1	+	+	+	-	-	-	Promoter (<=1kb)	7774672	7779345	4674	-	413490	XM_396934.7
NC_037638.1	20459218	20459813	20459494;20459483;20459497	201	125	188	119	198	40	109	84	117	105	175	120	9.47784	6.83298	8.83386	6.474	9.83458	2.16767	4.9918	4.5934	6.86524	5.90102	8.12416	5.05296	1.38707	1.36451	4.53694	1.08673	1.1634	1.6078	0.917798	0.391354	1	+	+	+	-	-	-	Exon (XM_006571296.3/413575, exon 2 of 6)	20445915	20450982	5068	-	413574	XM_026445452.1
NC_037653.1	723106	723591	723301;723270;723321	122	51	132	56	155	20	95	46	67	38	101	68	5.77116	2.81996	6.21642	3.07515	7.70952	1.11027	4.35648	2.53988	3.95624	2.17113	4.70832	2.88144	2.04654	2.0215	6.94382	1.71523	1.8222	1.63402	1.09042	0.356283	1	+	+	+	-	-	-	Promoter (2-3kb)	726163	732625	6463	+	552350	NM_001270821.1
NC_037638.1	22721863	22722226	22722000;22722026;22722045	121	63	131	59	157	75	87	52	67	67	94	75	5.72424	3.47072	6.16968	3.237	7.80836	4.01812	3.99344	2.86412	3.95624	3.78556	4.3852	3.17376	1.64929	1.90599	1.94329	1.3943	1.04509	1.3817	0.525071	0.0206209	1	+	+	+	-	-	-	Promoter (1-2kb)	22720414	22725817	5404	+	724239	XM_001120032.5
NC_037643.1	15596512	15596882	15596646;15596676;15596738	142	58	103	44	118	25	113	45	64	54	109	81	6.70956	3.19957	4.86096	2.42775	5.88098	1.37462	5.17332	2.48584	3.7817	3.06185	5.0776	3.42432	2.09702	2.00225	4.27826	2.08112	1.2351	1.48281	0.803783	0.245182	1	+	+	+	-	-	-	Promoter (<=1kb)	15597412	15609884	12473	+	724311	XM_006570666.3
NC_037645.1	8706235	8706759	8706399;8706518;8706413	135	77	135	70	165	21	109	72	79	94	121	97	6.38112	4.22994	6.35664	3.83045	8.20372	1.16314	4.9918	3.94492	4.6544	5.28865	5.63152	4.09248	1.50856	1.6595	7.05308	1.26537	0.880073	1.37607	1.53729	0.345221	1	+	+	+	-	-	-	Intron (XM_016913410.2/726514, intron 2 of 21)	8694134	8780078	85945	+	726514	XM_026442279.1
NC_037645.1	9065833	9066200	9066003;9065990;9066046	140	67	119	70	113	60	87	67	67	45	60	76	6.61572	3.68764	5.6088	3.83045	5.63388	3.22507	3.99344	3.67472	3.95624	2.56082	2.81576	3.21552	1.79403	1.46427	1.7469	1.08673	1.54491	0.875678	0.513056	0.110459	1	+	+	+	-	-	-	Intron (XR_003305212.1/113218953, intron 1 of 2)	8999564	9058681	59118	-	726829	XM_026442427.1
NC_037646.1	8757243	8757619	8757394;8757441;8757468	141	74	103	54	101	23	80	44	80	55	80	75	6.66264	4.06725	4.86096	2.96725	5.04084	1.26888	3.67578	2.4318	4.71258	3.11752	3.73896	3.17376	1.63812	1.6382	3.97267	1.51155	1.51164	1.17809	0.786953	0.321076	1	+	+	+	-	-	-	Promoter (<=1kb)	8754423	8756431	2009	-	726850	XM_006561819.3
NC_037638.1	1295183	1296251	1295265;1295719;1296126;1295769;1295772	304	144	255	132	344	114	117	113	151	127	130	174	14.3106	7.86335	11.9654	7.17535	17.0499	6.08005	5.35484	6.16056	8.84336	7.12576	6.04696	7.308	1.81991	1.66757	2.80424	0.869213	1.24104	0.827444	1.09877	0.0741714	1	+	+	+	-	-	-	Intron (XM_016917650.2/726912, intron 1 of 7)	1284336	1385267	100932	+	726912	XM_026440446.1
NC_037645.1	1131233	1131629	1131417;1131409;1131419	103	42	127	60	123	39	102	55	70	53	111	63	4.87968	2.33189	5.98272	3.29095	6.12808	2.1148	4.67414	3.02624	4.13078	3.00618	5.16992	2.67264	2.09259	1.81793	2.89771	1.54454	1.3741	1.93439	0.488397	0.171882	1	+	+	+	-	-	-	Intron (XM_003249196.4/100576405, intron 1 of 6)	979012	1164689	185678	-	100576405	XM_003249196.4
NC_037650.1	3589461	3589834	3589624;3589640;3589632	121	64	156	27	133	46	106	41	64	24	96	55	5.72424	3.52495	7.33818	1.5106	6.62228	2.48489	4.85566	2.26968	3.7817	1.39175	4.47752	2.33856	1.62392	4.85779	2.66502	2.13936	2.71723	1.91465	0.433838	0.496625	1	+	+	+	-	-	-	Promoter (<=1kb)	3590243	3593085	2843	+	100576527	XM_016915893.2
NC_037647.1	10642778	10643137	10642967;10642946;10642957	135	63	94	48	117	22	80	64	68	33	81	74	6.38112	3.47072	4.4403	2.64355	5.83156	1.21601	3.67578	3.5126	4.01442	1.89278	3.78512	3.132	1.83856	1.67967	4.79565	1.04646	2.12091	1.20853	0.925943	0.324298	1	+	+	+	-	-	-	Promoter (<=1kb)	10634085	10643868	9784	-	100577573	XM_006566184.3
NC_037641.1	7233832	7234351	7234015;7234020;7234144	155	89	145	71	166	53	76	72	70	87	110	100	7.31952	4.8807	6.82404	3.8844	8.25314	2.85498	3.49426	3.94492	4.13078	4.89896	5.12376	4.21776	1.49969	1.75678	2.89079	0.885762	0.843195	1.21481	1.06228	0.121103	1	+	+	+	-	-	-	Intron (XM_396254.7/412801, intron 3 of 13)	7104266	7199891	95626	-	100577798	XM_026440400.1
NC_037651.1	2145739	2146271	2145910;2145919;2145954	152	61	145	44	129	52	74	61	38	49	65	128	7.17876	3.36226	6.82404	2.42775	6.4246	2.80211	3.4035	3.35048	2.26902	2.7835	3.04656	5.38704	2.1351	2.81085	2.29277	1.01582	0.815168	0.565535	1.59479	0.00461121	1	+	+	+	-	-	-	Intron (XR_001705518.2/100577945, intron 3 of 13)	2167048	2169518	2471	-	100578307	XM_016916162.2
NC_037638.1	7351665	7352057	7351805;7351874;7351899	158	74	132	68	140	77	82	86	59	76	40	103	7.46028	4.06725	6.21642	3.72255	6.96822	4.12386	3.76654	4.70148	3.4908	4.28659	1.89256	4.34304	1.83423	1.66994	1.68973	0.801139	0.814354	0.435768	1.34031	0.00652067	1	+	+	+	-	-	-	Intron (XM_026444616.1/113219185, intron 3 of 4)	7234664	7234686	23	+	100629012	100629012
NC_037640.1	8726800	8727230	8727004;8727048;8727041	158	92	182	76	224	80	123	62	78	63	118	110	7.46028	5.04339	8.55342	4.15415	11.1195	4.28247	5.62712	3.40452	4.59622	3.56288	5.49304	4.63536	1.47922	2.05901	2.59652	1.65284	1.29003	1.18503	0.571595	0.162383	1	+	+	+	-	-	-	Promoter (<=1kb)	8727179	8727200	22	-	100629101	100629101
NC_037641.1	5093157	5093626	5093372;5093363;5093422	237	57	216	68	142	18	100	69	66	64	62	109	11.167	3.14534	10.1426	3.72255	7.06706	1.00453	4.58338	3.7828	3.89806	3.61855	2.90808	4.5936	3.55033	2.72464	7.03519	1.21164	1.07724	0.633072	2.18752	0.117487	1	+	+	+	-	-	-	Intron (XM_006560583.3/413399, intron 2 of 21)	5077992	5084745	6754	+	102654156	XR_408775.3
NC_037641.1	5083854	5084329	5084056;5084084;5084033	227	97	242	82	144	98	87	80	70	74	47	91	10.6978	5.31454	11.3578	4.47785	7.1659	5.23413	3.99344	4.37724	4.13078	4.17525	2.21568	3.84192	2.01293	2.53644	1.36907	0.912319	0.989349	0.576712	1.25582	0.0624772	1	+	+	+	-	-	-	Exon (XR_001702766.2/102654156, exon 3 of 3)	5077992	5084745	6754	+	102654156	XR_408775.3
NC_037638.1	25404059	25404481	25404245;25404210;25404224	158	81	125	62	149	18	100	72	66	62	90	97	7.46028	4.44686	5.88924	3.39885	7.413	1.00453	4.58338	3.94492	3.89806	3.50721	4.20056	4.09248	1.67765	1.73272	7.37957	1.16184	1.11144	1.02641	1.70928	0.317656	1	+	+	+	-	-	-	Exon (XR_001705461.2/102654381, exon 1 of 3)	25397853	25409322	11470	-	102654381	XR_001705461.2
NC_037638.1	4006039	4006449	4006214;4006211;4006232	155	51	150	77	165	87	105	53	87	74	118	98	7.31952	2.81996	7.05774	4.2081	8.20372	4.65256	4.81028	2.91816	5.11984	4.17525	5.49304	4.13424	2.59561	1.67718	1.76327	1.64839	1.22624	1.32867	0.522085	0.160693	1	+	+	+	-	-	-	Promoter (<=1kb)	4006295	4022331	16037	+	102654856	XR_003305305.1
NC_037652.1	1629179	1629538	1629352;1629369;1629375	117	43	125	41	96	20	68	26	72	55	72	70	5.53656	2.38612	5.88924	2.2659	4.79374	1.11027	3.13122	1.45908	4.24714	3.11752	3.36968	2.96496	2.32032	2.59907	4.31763	2.14602	1.36235	1.1365	0.99179	0.117891	1	+	+	+	-	-	-	Promoter (<=1kb)	1624801	1628650	3850	-	102656039	XR_407797.3
NC_037639.1	4412384	4412705	4412569;4412558;4412566	116	65	102	53	95	33	76	46	64	53	96	58	5.48964	3.57918	4.81422	2.9133	4.74432	1.79758	3.49426	2.53988	3.7817	3.00618	4.47752	2.46384	1.53377	1.6525	2.63928	1.37576	1.25798	1.81729	0.388256	0.327156	1	+	+	+	-	-	-	Distal Intergenic	4419924	4433438	13515	+	102656852	XR_001702146.2
NC_037643.1	4289060	4289419	4289209;4289245;4289250	120	62	112	48	111	36	86	62	78	53	85	81	5.67732	3.41649	5.28162	2.64355	5.53504	1.95619	3.94806	3.40452	4.59622	3.00618	3.96976	3.42432	1.66174	1.99793	2.8295	1.15965	1.52892	1.15928	0.753977	0.114075	1	+	+	+	-	-	-	Intron (XM_026441390.1/409786, intron 2 of 16)	4310002	4310993	992	+	102656855	XR_408828.2
NC_037651.1	5580841	5581197	5581019;5581001;5581038	106	73	93	42	91	40	98	50	60	54	57	72	5.02044	4.01302	4.39356	2.31985	4.54664	2.16767	4.49262	2.75604	3.54898	3.06185	2.67728	3.04848	1.25104	1.8939	2.09748	1.6301	1.1591	0.878234	0.515462	0.195228	1	+	+	+	-	-	-	Exon (XR_001705483.2/107965484, exon 3 of 4)	5574474	5588580	14107	+	107965484	XR_001705483.2
NC_037640.1	11900982	11901265	11901104;11901121;11901128	103	52	94	27	91	44	70	47	60	45	101	93	4.87968	2.87419	4.4403	1.5106	4.54664	2.37915	3.22198	2.59392	3.54898	2.56082	4.70832	3.92544	1.69776	2.93943	1.91104	1.24213	1.38588	1.19944	0.774723	0.138847	1	+	+	+	-	-	-	Distal Intergenic	11915307	11918009	2703	-	113218676	XR_003304456.1
NC_037646.1	6761713	6762563	6762249;6761889;6762278;6762281	335	126	250	143	324	62	183	159	87	122	147	155	15.7651	6.88721	11.7317	7.7688	16.0615	3.33081	8.34992	8.6464	5.11984	6.84741	6.83168	6.51456	2.28904	1.5101	4.8221	0.965711	0.747705	1.04868	1.64213	0.189084	1	+	+	+	-	-	-	Promoter (2-3kb)	6755406	6764653	9248	-	113219019	XR_003305372.1
[truncated: 4 more columns]

## Sheet: unique peaks for 2W
Chromosome	PeakStart	PeakEnd	oriSummitPos	Count_2Q_1_AC	Count_2Q_1_In	Count_2Q_2_AC	Count_2Q_2_In	Count_2Q_3_AC	Count_2Q_3_In	Count_2W_1_AC	Count_2W_1_In	Count_2W_2_AC	Count_2W_2_In	Count_2W_3_AC	Count_2W_3_In	RPM_2Q_1_AC	RPM_2Q_1_In	RPM_2Q_2_AC	RPM_2Q_2_In	RPM_2Q_3_AC	RPM_2Q_3_In	RPM_2W_1_AC	RPM_2W_1_In	RPM_2W_2_AC	RPM_2W_2_In	RPM_2W_3_AC	RPM_2W_3_In	FoldEnrich_2Q_1_AC	FoldEnrich_2Q_2_AC	FoldEnrich_2Q_3_AC	FoldEnrich_2W_1_AC	FoldEnrich_2W_2_AC	FoldEnrich_2W_3_AC	log2foldchange	pvalue	qvalue	In_2Q_1_AC	In_2Q_2_AC	In_2Q_3_AC	In_2W_1_AC	In_2W_2_AC	In_2W_3_AC	annotation	geneStart	geneEnd	geneLength	geneStrand	geneId	transcriptId
NC_037653.1	3923848	3924302	3924028;3924073;3924090	131	85	129	85	111	172	141	68	117	75	121	71	6.19344	4.66378	6.0762	4.6397	5.53504	9.14651	6.44396	3.72876	6.86524	4.23092	5.63152	3.00672	1.32799	1.30961	0.605153	1.72818	1.62264	1.87298	-0.687879	0.0984214	1	-	-	-	+	+	+	Promoter (2-3kb)	3927142	4037081	109940	+	406077	XM_016916896.2
NC_037648.1	13846553	13847019	13846615;13846853;13846823	166	139	153	92	84	201	193	85	127	77	146	105	7.83564	7.5922	7.19796	5.01735	4.2007	10.6797	8.80372	4.64744	7.44704	4.34226	6.78552	4.42656	1.03206	1.43461	0.393335	1.89432	1.71501	1.53291	-0.846375	0.116904	1	-	-	-	+	+	+	Promoter (<=1kb)	13846698	13848285	1588	+	408310	XM_391861.7
NC_037650.1	6160624	6160968	6160796;6160814;6160818	132	97	107	78	109	140	145	54	87	44	131	70	6.24036	5.31454	5.04792	4.26205	5.4362	7.45467	6.62548	2.9722	5.11984	2.50515	6.09312	2.96496	1.17421	1.18439	0.729234	2.22915	2.04373	2.05504	-1.03514	0.0102664	1	-	-	-	+	+	+	Distal Intergenic	6004509	6151702	147194	-	408429	XM_006560362.3
NC_037651.1	4685866	4686344	4685932;4686173;4686170;4686188	84	125	93	68	117	145	113	76	121	73	127	68	3.9882	6.83298	4.39356	3.72255	5.83156	7.71902	5.17332	4.16108	7.09796	4.11958	5.90848	2.88144	0.583669	1.18026	0.755479	1.24326	1.72298	2.05053	-0.993678	0.0513254	1	-	-	-	+	+	+	Intron (XR_003306086.1/107965489, intron 2 of 2)	4692057	4699494	7438	+	408446	XM_391994.7
NC_037652.1	5729605	5730201	5729863;5729865;5729966	154	146	131	112	128	130	254	63	147	76	143	93	7.2726	7.97181	6.16968	6.09635	6.37518	6.92597	11.5719	3.45856	8.61064	4.28659	6.64704	3.92544	0.91229	1.01203	0.920475	3.34587	2.00874	1.69332	-1.30888	0.109052	1	-	-	-	+	+	+	Intron (XR_001705638.2/102653594, intron 2 of 3)	5732980	5741014	8035	-	408533	XM_006563360.3
NC_037653.1	6446469	6447194	6446641;6446930;6446925	138	158	140	128	128	87	233	97	119	108	177	137	6.52188	8.62257	6.59034	6.95955	6.37518	4.65256	10.6189	5.29592	6.9816	6.06803	8.21648	5.76288	0.756373	0.946949	1.37025	2.00511	1.15055	1.42576	-0.575879	0.187755	1	-	-	-	+	+	+	Intron (XR_120113.4/100578474, intron 2 of 2)	6456567	6577971	121405	+	408562	XM_006563151.3
NC_037638.1	22532806	22533457	22533151;22533076;22533315	178	110	182	100	116	256	253	70	179	78	137	111	8.39868	6.01953	8.55342	5.44895	5.78214	13.5876	11.5265	3.83684	10.4724	4.39793	6.37008	4.67712	1.39524	1.56974	0.425545	3.00416	2.38121	1.36197	-0.992812	0.139801	1	-	-	-	+	+	+	Distal Intergenic	22554375	22584814	30440	+	408569	XM_392112.7
NC_037638.1	18861412	18862293	18861500;18861657;18862146;18861665	230	182	189	117	210	94	266	101	185	104	195	150	10.8385	9.92409	8.8806	6.3661	10.4276	5.02265	12.1165	5.51208	10.8215	5.84535	9.04736	6.30576	1.09214	1.39498	2.07612	2.19817	1.8513	1.43478	-0.265236	0.451042	1	-	-	-	+	+	+	Intron (XM_016917179.2/408579, intron 2 of 19)	18848644	18889873	41230	+	408579	XM_016917185.2
NC_037638.1	16025736	16026168	16025862;16025943;16025983	136	82	105	75	160	17	140	78	131	71	144	62	6.42804	4.50109	4.95444	4.1002	7.95662	0.95166	6.39858	4.26916	7.67976	4.00824	6.6932	2.63088	1.42811	1.20834	8.36078	1.49879	1.91599	2.54409	0.884028	0.549625	1	-	-	-	+	+	+	Promoter (1-2kb)	16023776	16039045	15270	+	408586	XM_026445279.1
NC_037639.1	14269767	14270162	14270016;14269987;14270030	134	81	128	75	132	148	124	58	126	54	109	67	6.3342	4.44686	6.02946	4.1002	6.57286	7.87763	5.6725	3.18836	7.38886	3.06185	5.0776	2.83968	1.42442	1.47053	0.83437	1.77913	2.4132	1.78809	-0.681334	0.0627523	1	-	-	-	+	+	+	Exon (XM_026439286.1/408664, exon 8 of 18)	14263267	14275325	12059	+	408664	XM_006568882.3
NC_037639.1	12179753	12180230	12180035;12179995;12180012	104	98	40	91	92	18	132	60	117	76	154	85	4.9266	5.36877	1.91634	4.9634	4.59606	1.00453	6.03554	3.29644	6.86524	4.28659	7.1548	3.59136	0.91764	0.386094	4.57533	1.83093	1.60156	1.99223	0.11604	0.919101	1	-	-	-	+	+	+	Intron (XM_026439251.1/408685, intron 1 of 16)	12173853	12295235	121383	+	408685	XM_026439254.1
NC_037640.1	13208352	13208915	13208498;13208551;13208592	120	115	65	102	138	19	130	72	85	43	174	89	5.67732	6.29068	3.08484	5.55685	6.86938	1.0574	5.94478	3.94492	5.00348	2.44948	8.078	3.7584	0.902497	0.555142	6.49648	1.50695	2.04267	2.14932	0.48101	0.734467	1	-	-	-	+	+	+	Intron (XM_026439652.1/408725, intron 3 of 22)	13093816	13224150	130335	-	408725	XM_026439652.1
NC_037640.1	8989477	8990039	8989611;8989859;8989858	109	93	112	106	135	130	137	59	83	61	131	95	5.1612	5.09762	5.28162	5.77265	6.72112	6.92597	6.26244	3.2424	4.88712	3.45154	6.09312	4.00896	1.01247	0.914939	0.970423	1.93142	1.41592	1.51988	-0.748123	0.0489992	1	-	-	-	+	+	+	Promoter (<=1kb)	8988982	9274667	285686	+	408740	XM_006563998.3
NC_037640.1	8529931	8530362	8530097;8530055;8530088	96	80	117	72	98	119	159	62	123	61	147	90	4.55124	4.39263	5.51532	3.93835	4.89258	6.3444	7.2608	3.40452	7.21432	3.45154	6.83168	3.80016	1.03611	1.40041	0.771165	2.13269	2.09017	1.79773	-0.908375	0.0183897	1	-	-	-	+	+	+	Intron (XM_016911227.2/408741, intron 2 of 7)	8525320	8634817	109498	+	408741	XM_006563982.3
NC_037640.1	8446447	8447016	8446711;8446590;8446659;8446793	191	138	196	127	168	223	226	82	190	73	172	112	9.00864	7.53797	9.20778	6.9056	8.35198	11.8429	10.3013	4.48532	11.1124	4.11958	7.98568	4.71888	1.1951	1.33338	0.705231	2.29667	2.69746	1.69228	-1.04804	0.0374248	1	-	-	-	+	+	+	Intron (XM_016911227.2/408741, intron 2 of 7)	8401591	8634817	233227	+	408741	XM_016911228.2
NC_037640.1	3072391	3072861	3072516;3072539;3072661	134	114	126	92	125	105	157	85	137	70	160	62	6.3342	6.23645	5.93598	5.01735	6.22692	5.60422	7.17004	4.64744	8.02884	3.95257	7.43176	2.63088	1.01567	1.18309	1.11111	1.54279	2.0313	2.82482	-0.951048	0.107914	1	-	-	-	+	+	+	Promoter (1-2kb)	3073963	3115462	41500	+	408759	XM_026439842.1
NC_037641.1	13300751	13301774	13301006;13301030;13301231;13301635;13301660	246	168	181	149	214	133	270	150	242	115	253	182	11.5892	9.16487	8.50668	8.0925	10.6253	7.08458	12.298	8.16004	14.1377	6.45772	11.7246	7.64208	1.26452	1.05118	1.49978	1.5071	2.18927	1.53422	-0.455107	0.158741	1	-	-	-	+	+	+	Intron (XM_026440137.1/408767, intron 1 of 16)	13208748	13274500	65753	-	408767	XM_026440140.1
NC_037641.1	9756411	9757005	9756509;9756754;9756820	180	157	168	130	165	141	216	73	115	91	158	111	8.49252	8.56834	7.89906	7.06745	8.20372	7.50754	9.84746	3.99896	6.74888	5.12164	7.33944	4.67712	0.991151	1.11767	1.09273	2.46251	1.31772	1.56922	-0.740619	0.173959	1	-	-	-	+	+	+	Intron (XM_026440434.1/408801, intron 2 of 9)	9613735	9840315	226581	-	408801	XM_026440434.1
NC_037642.1	12443836	12444527	12443979;12444363;12444395	130	122	114	69	182	59	135	71	117	59	199	102	6.14652	6.67029	5.3751	3.7765	9.04386	3.1722	6.17168	3.89088	6.86524	3.3402	9.232	4.30128	0.921477	1.4233	2.85097	1.58619	2.05534	2.14634	-0.155699	0.770428	1	-	-	-	+	+	+	Intron (XM_016912182.2/408862, intron 3 of 11)	12412395	12557089	144695	+	408862	XM_026440562.1
NC_037643.1	12017622	12017997	12017781;12017792;12017822	115	97	124	75	131	95	144	52	123	52	105	69	5.44272	5.31454	5.8425	4.1002	6.52344	5.07552	6.5801	2.86412	7.21432	2.95051	4.89296	2.9232	1.02412	1.42493	1.28528	2.29742	2.44511	1.67384	-0.78091	0.0443826	1	-	-	-	+	+	+	Intron (XM_016912569.2/408877, intron 1 of 6)	11986147	12101047	114901	+	408877	XM_016912571.2
NC_037645.1	9088310	9088690	9088478;9088477;9088486	134	98	131	72	133	147	177	43	149	53	164	71	6.3342	5.36877	6.16968	3.93835	6.62228	7.82476	8.07764	2.37776	8.727	3.00618	7.6164	3.00672	1.17982	1.56656	0.846324	3.39716	2.90302	2.53313	-1.29788	0.00638388	1	-	-	-	+	+	+	Promoter (1-2kb)	9088332	9090651	2320	-	408971	XM_016913535.2
NC_037648.1	11856055	11856787	11856276;11856273;11856577	125	136	134	129	101	90	169	84	106	89	205	130	5.91192	7.42951	6.3099	7.0135	5.04084	4.81117	7.7146	4.5934	6.22526	5.0103	9.50896	5.47056	0.795735	0.899679	1.04774	1.6795	1.24249	1.73821	-0.764556	0.0376594	1	-	-	-	+	+	+	Promoter (2-3kb)	11837338	11853963	16626	-	409095	XM_026443738.1
NC_037650.1	7372384	7373384	7372604;7372528;7372862;7373209;7372689;7372901	251	222	275	178	282	353	464	117	305	132	261	171	11.8238	12.0933	12.9002	9.65705	13.9859	18.716	21.1017	6.37672	17.8031	7.40411	12.0939	7.18272	0.977715	1.33583	0.74727	3.30918	2.40449	1.68375	-1.2731	0.0776667	1	-	-	-	+	+	+	Downstream (1-2kb)	7375352	7381521	6170	-	409230	XM_006562738.3
NC_037653.1	3139524	3139825	3139666;3139691;3139683	114	69	104	57	114	87	103	42	91	57	99	54	5.3958	3.7961	4.9077	3.1291	5.6833	4.65256	4.71952	2.32372	5.35256	3.22886	4.616	2.2968	1.42141	1.56841	1.22154	2.03102	1.65772	2.00975	-0.436297	0.0361122	1	-	-	-	+	+	+	Promoter (2-3kb)	3136798	3168485	31688	+	409514	XM_393021.7
NC_037641.1	5659103	5659462	5659271;5659234;5659295	131	94	74	74	91	85	144	69	87	50	91	85	6.19344	5.15185	3.5055	4.04625	4.54664	4.54682	6.5801	3.7828	5.11984	2.83917	4.24672	3.59136	1.20218	0.866358	0.99996	1.73948	1.80329	1.18248	-0.622859	0.089083	1	-	-	-	+	+	+	3' UTR	5655852	5667835	11984	-	409588	XM_026440513.1
NC_037652.1	5963753	5964254	5963966;5964016;5964048	164	137	147	107	122	103	148	62	105	53	167	96	7.7418	7.48374	6.91752	5.8266	6.07866	5.49848	6.76162	3.40452	6.16708	3.00618	7.75488	4.05072	1.03448	1.18723	1.10552	1.98607	2.05147	1.91444	-0.839049	0.000132291	1	-	-	-	+	+	+	Intron (XM_026445594.1/409665, intron 1 of 21)	5917080	5951087	34008	-	409665	XM_026445615.1
NC_037643.1	14922394	14923125	14922569;14922975;14922989	103	112	145	99	172	159	139	113	107	85	223	124	4.87968	6.12799	6.82404	5.395	8.54966	8.4592	6.3532	6.16056	6.28344	4.78762	10.3398	5.22	0.796294	1.26488	1.01069	1.03127	1.31243	1.9808	-0.493419	0.277285	1	-	-	-	+	+	+	Intron (XM_006570540.3/409707, intron 1 of 5)	14904450	14989935	85486	+	409707	XM_006570540.3
NC_037643.1	4479402	4480137	4479532;4479938;4479887;4479969	167	168	197	138	183	249	184	78	183	89	140	117	7.88256	9.16487	9.25452	7.49905	9.09328	13.2175	8.3953	4.26916	10.7051	5.0103	6.50856	4.92768	0.860084	1.23409	0.687973	1.9665	2.13662	1.32082	-0.96314	0.0497833	1	-	-	-	+	+	+	Promoter (<=1kb)	4479594	4586178	106585	+	409787	XM_026441416.1
NC_037642.1	8312856	8313687	8313042;8313533;8313006;8313409;8313064;8313534	140	157	174	133	186	206	354	113	176	86	260	123	6.61572	8.56834	8.1795	7.2293	9.24154	10.9441	16.1099	6.16056	10.2979	4.84329	12.0478	5.17824	0.772112	1.13144	0.844431	2.61501	2.12622	2.32662	-1.3629	0.00168353	1	-	-	-	+	+	+	Intron (XM_026440945.1/409818, intron 2 of 7)	8287731	8383943	96213	+	409818	XM_026440946.1
NC_037647.1	11668260	11668609	11668400;11668461;11668464	104	68	97	64	116	109	139	60	86	47	96	67	4.9266	3.74187	4.58052	3.50675	5.78214	5.8157	6.3532	3.29644	5.06166	2.67216	4.47752	2.83968	1.31661	1.3062	0.994229	1.92729	1.89422	1.57677	-0.577689	0.0182645	1	-	-	-	+	+	+	Exon (XM_006569156.3/410179, exon 6 of 16)	11665151	11675722	10572	+	410179	XM_006569156.3
NC_037647.1	9176168	9177417	9176318;9176328;9177203;9176836;9176818	287	193	202	178	341	62	348	129	229	122	384	213	13.513	10.5206	9.48822	9.65705	16.9016	3.33081	15.8376	7.0252	13.3814	6.84741	17.7716	8.93664	1.28443	0.982517	5.07432	2.2544	1.95423	1.98862	0.244402	0.799594	1	-	-	-	+	+	+	Intron (XM_026443379.1/410211, intron 2 of 9)	9170609	9237044	66436	+	410211	XM_006566016.3
NC_037647.1	7026605	7027097	7026727;7026859;7026778	160	97	104	67	119	26	185	88	97	61	137	82	7.55412	5.31454	4.9077	3.6686	5.9304	1.42749	8.44068	4.80956	5.70164	3.45154	6.37008	3.46608	1.42141	1.33776	4.15442	1.75498	1.65191	1.83783	0.398568	0.60896	1	-	-	-	+	+	+	Intron (XM_006562788.3/410233, intron 1 of 16)	6966442	7036790	70349	-	410233	XM_006562788.3
NC_037647.1	6282663	6283236	6282970;6283001;6283079	144	103	62	68	128	34	171	95	128	65	200	114	6.8034	5.63992	2.94462	3.72255	6.37518	1.85045	7.80536	5.18784	7.50522	3.67422	9.27816	4.8024	1.20629	0.791022	3.44521	1.50455	2.04267	1.93198	-0.00969103	0.989626	1	-	-	-	+	+	+	Intron (XM_006562851.3/410236, intron 1 of 10)	6265679	6286951	21273	-	410236	XM_006562851.3
NC_037648.1	15714008	15714443	15714204;15714252;15714245	147	112	99	66	135	169	173	67	125	66	117	69	6.94416	6.12799	4.674	3.61465	6.72112	8.9879	7.89612	3.67472	7.33068	3.72989	5.44688	2.9232	1.13319	1.29307	0.747796	2.14877	1.96539	1.86333	-0.913211	0.0143973	1	-	-	-	+	+	+	Intron (XM_003251514.4/100578939, intron 3 of 6)	15692949	15701225	8277	+	410269	XM_393750.7
NC_037648.1	295431	295874	295550;295646;295730	126	101	91	59	118	27	159	78	116	56	124	65	5.95884	5.53146	4.30008	3.237	5.88098	1.48036	7.2608	4.26916	6.80706	3.17319	5.77	2.75616	1.07726	1.32842	3.97267	1.70076	2.14518	2.09349	0.102859	0.88966	1	-	-	-	+	+	+	Promoter (1-2kb)	235182	297554	62373	-	410293	XM_006557421.3
NC_037648.1	12024484	12025017	12024717;12024814;12024634	174	135	157	116	112	234	221	79	162	59	117	74	8.211	7.37528	7.38492	6.31215	5.58446	12.4245	10.0744	4.3232	9.48334	3.3402	5.44688	3.132	1.11331	1.16995	0.449472	2.33031	2.83915	1.73911	-1.33804	0.027849	1	-	-	-	+	+	+	Exon (XM_006566322.3/410320, exon 3 of 15)	11956327	12051973	95647	-	410320	XM_006566322.3
NC_037649.1	11185367	11185902	11185479;11185712;11185612	155	138	157	120	137	190	205	60	113	62	133	118	7.31952	7.53797	7.38492	6.52795	6.81996	10.0982	9.34828	3.29644	6.63252	3.50721	6.18544	4.96944	0.97102	1.13128	0.675364	2.83587	1.89111	1.2447	-1.10427	0.138967	1	-	-	-	+	+	+	Distal Intergenic	11131317	11160765	29449	-	410379	XM_006566860.3
NC_037650.1	8265554	8265910	8265695;8265741;8265773	143	105	99	80	137	143	134	45	150	50	99	59	6.75648	5.74838	4.674	4.36995	6.81996	7.61328	6.1263	2.48584	8.78518	2.83917	4.616	2.5056	1.17537	1.06958	0.895798	2.46448	3.09428	1.84227	-1.23662	0.052931	1	-	-	-	+	+	+	Distal Intergenic	8230305	8238301	7997	-	410467	XM_006564049.3
NC_037650.1	8275080	8275562	8275270;8275274;8275332	163	112	148	92	153	125	195	57	127	73	139	80	7.69488	6.12799	6.96426	5.01735	7.61068	6.66162	8.89448	3.13432	7.44704	4.11958	6.4624	3.38256	1.25569	1.38804	1.14247	2.83777	1.80772	1.91051	-0.792065	0.100114	1	-	-	-	+	+	+	Distal Intergenic	8230305	8238301	7997	-	410467	XM_006564049.3
NC_037651.1	3976403	3976842	3976606;3976554;3976612	129	101	111	82	82	108	157	44	100	67	99	80	6.0996	5.53146	5.23488	4.47785	4.10186	5.76283	7.17004	2.4318	5.87618	3.78556	4.616	3.38256	1.10271	1.16906	0.711779	2.94845	1.55226	1.36465	-0.975189	0.187747	1	-	-	-	+	+	+	Intron (XM_006560177.3/410480, intron 2 of 13)	3948496	4123712	175217	+	410480	XM_016916230.2
NC_037651.1	7974584	7975009	7974764;7974766;7974858	151	107	137	75	124	95	187	61	137	53	136	82	7.13184	5.85684	6.45012	4.1002	6.1775	5.07552	8.53144	3.35048	8.02884	3.00618	6.32392	3.46608	1.21769	1.57312	1.21712	2.54633	2.67078	1.82452	-0.81305	0.0446698	1	-	-	-	+	+	+	Intron (XR_003306093.1/726697, intron 6 of 6)	7903896	7958964	55069	-	410517	XM_393996.7
NC_037638.1	18651627	18652022	18651843;18651819;18651856	101	69	89	45	94	114	176	52	112	52	102	70	4.78584	3.7961	4.2066	2.4817	4.6949	6.08005	8.03226	2.86412	6.57434	2.95051	4.75448	2.96496	1.26073	1.69505	0.772181	2.80444	2.2282	1.60356	-0.831974	0.0954383	1	-	-	-	+	+	+	Intron (XM_006571108.3/410696, intron 4 of 24)	18591508	18645325	53818	-	410696	XM_026440603.1
NC_037638.1	17624120	17624488	17624303;17624317;17624295	108	75	130	65	73	67	139	60	91	50	129	57	5.11428	4.12148	6.12294	3.5607	3.65708	3.59516	6.3532	3.29644	5.35256	2.83917	6.0008	2.42208	1.24088	1.71959	1.01722	1.92729	1.88526	2.47754	-0.661147	0.0524626	1	-	-	-	+	+	+	Distal Intergenic	17614949	17619197	4249	+	410705	XM_394182.7
NC_037638.1	12637997	12638465	12638160;12638235;12638333	116	111	97	67	117	117	116	37	93	57	153	117	5.48964	6.07376	4.58052	3.6686	5.83156	6.23866	5.30946	2.05352	5.46892	3.22886	7.10864	4.92768	0.903829	1.24857	0.934746	2.58554	1.69376	1.44259	-0.890218	0.116143	1	-	-	-	+	+	+	Promoter (1-2kb)	12636706	13027097	390392	+	410718	XM_026445373.1
NC_037638.1	3154528	3155267	3154713;3154777;3154785	109	140	126	114	125	100	247	63	117	85	261	109	5.1612	7.64643	5.93598	6.20425	6.22692	5.33987	11.2542	3.45856	6.86524	4.78762	12.0939	4.5936	0.674982	0.95676	1.16612	3.25401	1.43396	2.63277	-1.38767	0.0973273	1	-	-	-	+	+	+	Distal Intergenic	3160299	3166163	5865	+	410757	XM_394233.7
NC_037638.1	24045178	24045640	24045371;24045444;24045467	157	100	102	74	166	57	147	54	84	35	135	98	7.41336	5.47723	4.81422	4.04625	8.25314	3.06646	6.71624	2.9722	4.9453	2.00412	6.27776	4.13424	1.35349	1.1898	2.69142	2.25969	2.46757	1.51848	-0.254762	0.583701	1	-	-	-	+	+	+	Intron (XM_394261.7/410785, intron 1 of 11)	23813045	24054936	241892	-	410785	XM_394261.7
NC_037638.1	24046093	24046506	24046296;24046348;24046369	114	98	132	103	106	43	148	66	93	56	153	86	5.3958	5.36877	6.21642	5.6108	5.28794	2.32628	6.76162	3.62068	5.46892	3.17319	7.10864	3.63312	1.00503	1.10794	2.27313	1.8675	1.72348	1.95662	-0.338923	0.442283	1	-	-	-	+	+	+	Intron (XM_394261.7/410785, intron 1 of 11)	23813045	24054936	241892	-	410785	XM_394261.7
NC_037639.1	14394854	14395265	14394991;14394991;14395057;14395235	137	89	127	73	111	110	119	42	86	41	138	77	6.47496	4.8807	5.98272	3.9923	5.53504	5.86857	5.4456	2.32372	5.06166	2.33814	6.41624	3.25728	1.32665	1.49856	0.943167	2.34348	2.16482	1.96982	-0.781632	0.0141009	1	-	-	-	+	+	+	Promoter (<=1kb)	14375627	14395029	19403	-	410815	NM_001040256.1
NC_037639.1	11857786	11858287	11857897;11858069;11858056	142	105	109	85	150	35	227	77	165	67	156	108	6.70956	5.74838	5.1414	4.6397	7.46242	1.90332	10.3466	4.21512	9.65788	3.78556	7.24712	4.55184	1.16721	1.10813	3.92074	2.45464	2.55124	1.59213	-0.0906756	0.901449	1	-	-	-	+	+	+	Intron (XM_006568172.2/410856, intron 1 of 5)	11844820	11846382	1563	+	410854	XM_394330.7
NC_037640.1	5735870	5736285	5736086;5736057;5735991	145	103	147	83	129	142	167	45	123	70	112	68	6.85032	5.63992	6.91752	4.5318	6.4246	7.56041	7.62384	2.48584	7.21432	3.95257	5.21608	2.88144	1.21461	1.52644	0.849769	3.06691	1.82522	1.81023	-0.900356	0.114428	1	-	-	-	+	+	+	Intron (XM_026439411.1/410951, intron 2 of 13)	5716966	6016825	299860	+	410951	XM_026439412.1
NC_037640.1	3687964	3688543	3688075;3688332;3688370	93	113	121	96	135	132	144	74	102	69	157	104	4.41048	6.18222	5.70228	5.23315	6.72112	7.03171	6.5801	4.053	5.99254	3.8969	7.29328	4.3848	0.713414	1.08965	0.95583	1.62351	1.53777	1.66331	-0.80632	0.0166289	1	-	-	-	+	+	+	Intron (XM_026439743.1/410967, intron 1 of 11)	3567413	3672673	105261	-	410967	XM_026439742.1
NC_037641.1	12083413	12083907	12083568;12083547;12083745	99	147	132	95	104	158	149	70	114	70	130	100	4.692	8.02604	6.21642	5.1792	5.1891	8.40633	6.807	3.83684	6.6907	3.95257	6.04696	4.21776	0.584597	1.20027	0.617285	1.77412	1.69275	1.43369	-1.02862	0.0344551	1	-	-	-	+	+	+	Intron (XM_016911711.2/726335, intron 4 of 7)	12088508	12090673	2166	-	410990	XM_006567154.3
NC_037641.1	6514843	6515133	6514966;6515002;6514991	92	48	94	48	65	39	100	40	84	42	109	71	4.36356	2.65727	4.4403	2.64355	3.26172	2.1148	4.58338	2.21564	4.9453	2.39381	5.0776	3.00672	1.64212	1.67967	1.54233	2.06865	2.06587	1.68875	-0.259649	0.11568	1	-	-	-	+	+	+	Intron (XM_016911876.2/411038, intron 2 of 10)	6467101	6499183	32083	-	411038	XM_006562338.3
NC_037642.1	7553332	7553982	7553686;7553537;7553869	236	166	197	124	144	218	270	82	196	84	156	111	11.12	9.05641	9.25452	6.74375	7.1659	11.5785	12.298	4.48532	11.4615	4.73195	7.24712	4.67712	1.22786	1.37231	0.618897	2.74183	2.42215	1.54948	-1.06042	0.0613418	1	-	-	-	+	+	+	Intron (XM_006564730.3/411086, intron 1 of 6)	7492476	7539140	46665	-	411086	XM_006564731.3
NC_037645.1	9505929	9506229	9506126;9506081;9506080	106	57	61	47	87	57	102	48	87	50	113	72	5.02044	3.14534	2.89788	2.5896	4.34896	3.06646	4.67414	2.64796	5.11984	2.83917	5.26224	3.04848	1.59615	1.11905	1.41823	1.76519	1.80329	1.72618	-0.357197	0.105154	1	-	-	-	+	+	+	Promoter (<=1kb)	9506667	9525972	19306	+	411285	XM_016913627.2
NC_037639.1	4789585	4790525	4789739;4790309;4790343;4790367	123	123	135	122	151	122	127	101	101	101	290	155	5.81808	6.72452	6.35664	6.63585	7.51184	6.50301	5.80864	5.51208	5.93436	5.67834	13.4326	6.51456	0.865204	0.957924	1.15513	1.0538	1.04509	2.06194	-0.482399	0.363501	1	-	-	-	+	+	+	Intron (XM_006559075.2/411452, intron 2 of 16)	4733953	4796033	62081	-	411452	XM_006559075.2
NC_037639.1	4787972	4788418	4788264;4788164;4788107	139	119	138	108	154	99	153	71	148	80	131	92	6.5688	6.5076	6.49686	5.88055	7.6601	5.287	6.98852	3.89088	8.66882	4.50927	6.09312	3.88368	1.0094	1.1048	1.44886	1.79613	1.92244	1.5689	-0.569461	0.0298475	1	-	-	-	+	+	+	Intron (XM_006559075.2/411452, intron 2 of 16)	4733953	4796033	62081	-	411452	XM_006559075.2
NC_037652.1	5103343	5103781	5103515;5103533;5103538	90	87	103	72	107	117	140	41	123	78	122	80	4.26972	4.77224	4.86096	3.93835	5.33736	6.23866	6.39858	2.26968	7.21432	4.39793	5.67768	3.38256	0.894699	1.23426	0.85553	2.81916	1.64039	1.67852	-1.0403	0.102063	1	-	-	-	+	+	+	Promoter (<=1kb)	5103522	5107169	3648	+	411569	XR_001705692.2
NC_037647.1	2225557	2225897	2225759;2225675;2225758	92	79	82	76	65	98	104	53	87	56	97	63	4.36356	4.3384	3.87942	4.15415	3.26172	5.23413	4.7649	2.91816	5.11984	3.17319	4.52368	2.67264	1.0058	0.933866	0.623164	1.63284	1.61347	1.69259	-0.946453	0.0180238	1	-	-	-	+	+	+	Distal Intergenic	2242972	2255533	12562	+	412475	XM_006559062.3
NC_037648.1	1768665	1769410	1768823;1769234;1768823;1769241;1768877	279	177	221	129	241	276	289	132	247	98	171	113	13.1376	9.65294	10.3763	7.0135	11.9596	14.645	13.1602	7.18732	14.4286	5.51133	7.93952	4.76064	1.36099	1.47948	0.816634	1.83103	2.61799	1.66774	-0.742066	0.0914713	1	-	-	-	+	+	+	Intron (XM_396292.7/412840, intron 3 of 6)	1763187	1798575	35389	+	412840	XM_026443651.1
NC_037640.1	12424561	12425041	12424670;12424761;12424739	135	96	102	70	111	98	165	73	85	56	149	107	6.38112	5.26031	4.81422	3.83045	5.53504	5.23413	7.53308	3.99896	5.00348	3.17319	6.924	4.51008	1.21307	1.25683	1.05749	1.88376	1.5768	1.53523	-0.502111	0.0280045	1	-	-	-	+	+	+	Promoter (<=1kb)	12425832	12505715	79884	+	412956	XM_026439827.1
NC_037648.1	9948693	9949233	9948809;9949051;9949183	130	86	148	88	147	126	197	80	119	71	130	83	6.14652	4.71801	6.96426	4.80155	7.31416	6.71449	8.98524	4.37724	6.9816	4.00824	6.04696	3.50784	1.30278	1.45042	1.08931	2.05272	1.74181	1.72384	-0.522195	0.0202423	1	-	-	-	+	+	+	Intron (XM_396585.7/413134, intron 1 of 5)	9938043	9979658	41616	+	413134	XM_396585.7
NC_037641.1	5164965	5165498	5165297;5165265;5165233	125	121	130	113	90	163	236	61	110	73	186	99	5.91192	6.61606	6.12294	6.1503	4.49722	8.67068	10.7551	3.35048	6.45798	4.11958	8.63192	4.176	0.893571	0.995551	0.51867	3.21002	1.56763	2.06703	-1.50727	0.0827646	1	-	-	-	+	+	+	Intron (XM_006560590.3/551257, intron 2 of 3)	5152053	5221820	69768	+	551257	XM_006560589.3
NC_037641.1	5157117	5157704	5157277;5157491;5157539	154	114	130	83	147	108	164	89	105	68	159	78	7.2726	6.23645	6.12294	4.5318	7.31416	5.76283	7.4877	4.8636	6.16708	3.84123	7.3856	3.29904	1.16614	1.35111	1.2692	1.53954	1.6055	2.23871	-0.507766	0.13275	1	-	-	-	+	+	+	Intron (XM_006560590.3/551257, intron 2 of 3)	5152053	5221820	69768	+	551257	XM_006560589.3
NC_037644.1	8902812	8903242	8902991;8903011;8903047	142	100	115	80	131	132	131	76	134	65	108	69	6.70956	5.47723	5.42184	4.36995	6.52344	7.03171	5.99016	4.16108	7.8543	3.67422	5.03144	2.9232	1.22499	1.24071	0.927717	1.43957	2.13768	1.72121	-0.642833	0.0693014	1	-	-	-	+	+	+	Promoter (1-2kb)	8901612	9058966	157355	+	551259	XM_026441830.1
NC_037653.1	3747082	3747940	3747209;3747217;3747697;3747719;3747819	189	145	134	113	186	136	246	98	164	87	229	132	8.9148	7.91758	6.3099	6.1503	9.24154	7.24319	11.2089	5.34996	9.5997	4.89896	10.6168	5.55408	1.12595	1.02595	1.27589	2.09514	1.95954	1.91153	-0.799534	0.00104033	1	-	-	-	+	+	+	Intron (XM_016916906.2/551594, intron 4 of 5)	3692841	3799724	106884	+	551594	NM_001168700.1
NC_037641.1	2477509	2477912	2477736;2477738;2477745	151	111	108	92	89	189	102	66	101	50	84	76	7.13184	6.07376	5.09466	5.01735	4.4478	10.0453	4.67414	3.62068	5.93436	2.83917	3.9236	3.21552	1.17421	1.01541	0.442774	1.29096	2.09017	1.22021	-0.805681	0.143085	1	-	-	-	+	+	+	Intron (XM_624133.6/551746, intron 1 of 11)	2443236	2619174	175939	+	551746	XM_624133.6
NC_037649.1	6851975	6852438	6852230;6852182;6852260	142	116	119	92	103	160	148	67	97	56	124	85	6.70956	6.34491	5.6088	5.01735	5.13968	8.51207	6.76162	3.67472	5.70164	3.17319	5.77	3.59136	1.05747	1.11788	0.603811	1.84004	1.79682	1.60663	-0.915876	0.0228568	1	-	-	-	+	+	+	Exon (XM_006562253.3/551765, exon 7 of 9)	6826678	6854834	28157	+	551765	XM_006562253.3
NC_037640.1	5534811	5535257	5535107;5535054;5535076	136	90	159	95	158	104	209	61	107	45	164	115	6.42804	4.93493	7.4784	5.1792	7.85778	5.55135	9.5298	3.35048	6.28344	2.56082	7.6164	4.84416	1.30256	1.44393	1.41547	2.84431	2.45368	1.57228	-0.723105	0.136714	1	-	-	-	+	+	+	Intron (XM_026439340.1/551828, intron 1 of 15)	5500738	5686185	185448	+	551828	NM_001242574.1
NC_037650.1	2973285	2973843	2973419;2973430;2973514	118	127	128	100	131	154	131	65	106	59	165	122	5.58348	6.94144	6.02946	5.44895	6.52344	8.19485	5.99016	3.56664	6.22526	3.3402	7.66256	5.13648	0.804369	1.10654	0.796041	1.6795	1.86374	1.49179	-0.895333	0.0063989	1	-	-	-	+	+	+	Distal Intergenic	2918638	2969534	50897	-	551895	XM_624281.5
NC_037652.1	5541138	5541565	5541360;5541363;5541339	158	137	153	91	146	144	183	50	151	85	149	84	7.46028	7.48374	7.19796	4.9634	7.26474	7.66615	8.34992	2.75604	8.84336	4.78762	6.924	3.5496	0.996865	1.45021	0.947639	3.02968	1.84713	1.95064	-1.00806	0.077529	1	-	-	-	+	+	+	Intron (XM_026445503.1/551957, intron 1 of 3)	5493865	5548284	54420	-	551957	XM_026445503.1
NC_037642.1	7691432	7691902	7691639;7691627;7691754	148	91	44	72	145	11	141	54	109	65	145	87	6.99108	4.98916	2.1033	3.93835	7.21532	0.63444	6.44396	2.9722	6.3998	3.67422	6.73936	3.67488	1.40125	0.534056	11.3727	2.16808	1.74181	1.8339	1.21222	0.543826	1	-	-	-	+	+	+	Intron (XM_016912223.2/552079, intron 3 of 12)	7660753	8093347	432595	+	552079	XM_006564734.3
NC_037642.1	7684796	7685357	7684944;7685223;7685220	98	88	93	59	121	26	130	74	96	66	147	102	4.64508	4.82647	4.39356	3.237	6.02924	1.42749	5.94478	4.053	5.64346	3.72989	6.83168	4.30128	0.962418	1.35729	4.22367	1.46676	1.51304	1.58829	0.518445	0.587378	1	-	-	-	+	+	+	Intron (XM_016912223.2/552079, intron 2 of 12)	7660753	8093347	432595	+	552079	XM_006564734.3
NC_037642.1	8177159	8177584	8177290;8177315;8177292	99	108	44	68	119	25	105	49	85	59	138	81	4.692	5.91107	2.1033	3.72255	5.9304	1.37462	4.81028	2.702	5.00348	3.3402	6.41624	3.42432	0.793765	0.565016	4.31421	1.78027	1.49796	1.87373	0.138991	0.899535	1	-	-	-	+	+	+	Distal Intergenic	8229414	8230607	1194	-	552103	XM_006564737.3
NC_037638.1	21891492	21892086	21891637;21891679;21891747	200	163	176	93	201	199	185	81	165	91	198	130	9.43092	8.89372	8.27298	5.0713	9.98284	10.574	8.44068	4.43128	9.65788	5.12164	9.18584	5.47056	1.0604	1.63133	0.944093	1.9048	1.8857	1.67914	-0.589161	0.0899667	1	-	-	-	+	+	+	Intron (XM_006571350.3/552142, intron 2 of 15)	21819932	21888042	68111	-	552142	XM_026443282.1
NC_037649.1	9860819	9861234	9860993;9861016;9860953	161	110	98	76	153	28	178	68	137	53	141	94	7.60104	6.01953	4.62726	4.15415	7.61068	1.53323	8.12302	3.72876	8.02884	3.00618	6.55472	3.9672	1.26273	1.11389	4.96382	2.17848	2.67078	1.65223	0.175097	0.847073	1	-	-	-	+	+	+	Intron (XM_026444405.1/552397, intron 2 of 4)	9706257	9931963	225707	-	552397	XM_624769.5
NC_037649.1	9926003	9926373	9926171;9926173;9926244	141	61	129	65	120	40	153	45	85	46	124	70	6.66264	3.36226	6.0762	3.5607	5.97982	2.16767	6.98852	2.48584	5.00348	2.61649	5.77	2.96496	1.9816	1.70646	2.75864	2.81133	1.91229	1.94606	-0.0490577	0.87151	1	-	-	-	+	+	+	Intron (XM_026444405.1/552397, intron 1 of 4)	9706257	9931963	225707	-	552397	XM_624769.5
NC_037642.1	11759957	11760516	11760126;11760177;11760196	152	132	137	81	135	242	188	80	168	77	134	83	7.17876	7.21259	6.45012	4.4239	6.72112	12.8474	8.57682	4.37724	9.83242	4.34226	6.2316	3.50784	0.99531	1.45802	0.52315	1.95941	2.26436	1.77648	-1.01142	0.0449035	1	-	-	-	+	+	+	Distal Intergenic	11746225	11759189	12965	+	552513	XM_624889.6
NC_037652.1	6847891	6848240	6848053;6848035;6848114	135	90	142	75	107	134	161	53	105	48	105	70	6.38112	4.93493	6.68382	4.1002	5.33736	7.13745	7.35156	2.91816	6.16708	2.72783	4.89296	2.96496	1.29305	1.63012	0.747796	2.51925	2.2608	1.65026	-0.808727	0.0648505	1	-	-	-	+	+	+	Distal Intergenic	6603005	6841964	238960	-	552844	XM_625220.6
NC_037639.1	12320262	12321458	12320490;12321043;12320506;12321082;12321365	261	257	282	209	224	176	569	159	240	145	289	209	12.293	13.9913	13.2274	11.3295	11.1195	9.35799	25.8666	8.6464	14.0214	8.12782	13.3864	8.7696	0.878617	1.16752	1.18824	2.9916	1.72511	1.52646	-0.948793	0.155128	1	-	-	-	+	+	+	Promoter (<=1kb)	12317475	12319278	1804	-	724211	XM_001119981.5
NC_037639.1	12313882	12314528	12313979;12314135;12314026;12314352;12314340	173	146	179	119	183	199	247	88	176	72	179	118	8.16408	7.97181	8.4132	6.474	9.09328	10.574	11.2542	4.80956	10.2979	4.06391	8.3088	4.96944	1.02412	1.29954	0.859966	2.33996	2.53399	1.67198	-1.03993	0.0325472	1	-	-	-	+	+	+	Intron (XM_006569087.3/410852, intron 1 of 15)	12317475	12319278	1804	-	724211	XM_001119981.5
NC_037650.1	10305549	10306328	10305616;10305673;10306177;10305720	190	152	189	136	120	202	196	100	189	101	189	139	8.96172	8.29719	8.8806	7.39115	5.97982	10.7326	8.93986	5.45804	11.0542	5.67834	8.7704	5.8464	1.08009	1.20152	0.557164	1.63792	1.94673	1.50014	-0.840921	0.0417134	1	-	-	-	+	+	+	Exon (XM_623641.6/551250, exon 5 of 5)	10308922	10310350	1429	-	724246	XM_001120039.3
NC_037640.1	260947	261359	261138;261158;261108	138	112	122	81	147	101	160	46	156	53	127	95	6.52188	6.12799	5.74902	4.4239	7.31416	5.39274	7.30618	2.53988	9.13426	3.00618	5.90848	4.00896	1.06428	1.29954	1.3563	2.87658	3.03849	1.47382	-0.990013	0.12874	1	-	-	-	+	+	+	Promoter (<=1kb)	261149	279857	18709	+	724270	XM_006571809.3
NC_037638.1	15523453	15523957	15523668;15523661;15523658	85	69	44	70	112	3	132	54	82	67	226	77	4.03512	3.7961	2.1033	3.83045	5.58446	0.21148	6.03554	2.9722	4.82894	3.78556	10.4783	3.25728	1.06296	0.5491	26.4066	2.03066	1.27562	3.21689	2.10274	0.4897	1	-	-	-	+	+	+	Distal Intergenic	15541180	15561401	20222	+	724456	XM_016912519.2
NC_037647.1	1970823	1971276	1971002;1970960;1971082	143	105	129	71	156	98	182	67	126	66	162	122	6.75648	5.74838	6.0762	3.8844	7.75894	5.23413	8.30454	3.67472	7.38886	3.72989	7.52408	5.13648	1.17537	1.56426	1.48237	2.25991	1.98099	1.46483	-0.434484	0.155655	1	-	-	-	+	+	+	Promoter (1-2kb)	1972965	2039877	66913	+	724765	XR_003305384.1
NC_037638.1	17665342	17665929	17665690;17665498;17665751	188	141	150	105	142	152	191	64	151	87	137	85	8.86788	7.70066	7.05774	5.7187	7.06706	8.08911	8.71296	3.5126	8.84336	4.89896	6.37008	3.59136	1.15157	1.23415	0.873651	2.48049	1.80515	1.77372	-0.89457	0.0383264	1	-	-	-	+	+	+	Intron (XM_006571084.3/725078, intron 2 of 11)	17677994	17694550	16557	+	725078	XM_026444031.1
NC_037638.1	17760056	17760671	17760172;17760397;17760466	133	110	170	120	100	182	155	94	158	91	137	109	6.28728	6.01953	7.99254	6.52795	4.99142	9.67521	7.07928	5.1338	9.25062	5.12164	6.37008	4.5936	1.04448	1.22436	0.515898	1.37896	1.80618	1.38673	-0.715244	0.0897572	1	-	-	-	+	+	+	Intron (XM_006571083.3/100577365, intron 1 of 2)	17794796	17799327	4532	-	725151	XM_026444941.1
NC_037644.1	10277173	10277475	10277308;10277325;10277367	115	77	104	70	100	81	119	52	92	44	99	67	5.44272	4.22994	4.9077	3.83045	4.99142	4.33534	5.4456	2.86412	5.41074	2.50515	4.616	2.83968	1.28671	1.28123	1.15133	1.90132	2.15985	1.62554	-0.612568	0.0423098	1	-	-	-	+	+	+	Intron (XM_001121189.5/725329, intron 5 of 7)	10246853	10264697	17845	-	725233	XR_410293.3
NC_037644.1	10312412	10312744	10312571;10312586;10312533	112	73	103	68	77	59	130	74	125	52	108	67	5.30196	4.01302	4.86096	3.72255	3.85476	3.1722	5.94478	4.053	7.33068	2.95051	5.03144	2.83968	1.32119	1.30581	1.21517	1.46676	2.48455	1.77183	-0.574884	0.171714	1	-	-	-	+	+	+	Intron (XM_001121189.5/725329, intron 5 of 7)	10246853	10264697	17845	-	725233	XR_410293.3
NC_037649.1	7213606	7214093	7213749;7213887;7213816	165	128	164	84	126	146	177	77	135	76	127	108	7.78872	6.99567	7.7121	4.58575	6.27634	7.77189	8.07764	4.21512	7.91248	4.28659	5.90848	4.55184	1.11336	1.68175	0.807569	1.91635	1.84587	1.29804	-0.490138	0.210841	1	-	-	-	+	+	+	Intron (XM_026444167.1/410369, intron 1 of 7)	7115679	7126064	10386	-	725353	XM_006562263.3
NC_037647.1	10167564	10168134	10167687;10167796;10167925;10167952	138	107	134	110	158	29	174	84	124	81	158	76	6.52188	5.85684	6.3099	5.98845	7.85778	1.5861	7.9415	4.5934	7.2725	4.56494	7.33944	3.21552	1.11355	1.05368	4.95415	1.72889	1.59312	2.2825	0.345566	0.734543	1	-	-	-	+	+	+	Exon (XM_006566114.3/725389, exon 6 of 9)	10164599	10175694	11096	-	725389	XM_006566114.3
NC_037638.1	16062634	16062976	16062788;16062783;16062826	136	77	109	70	135	113	123	59	115	48	98	65	6.42804	4.22994	5.1414	3.83045	6.72112	6.02718	5.62712	3.2424	6.74888	2.72783	4.56984	2.75616	1.51965	1.34224	1.11514	1.73548	2.47408	1.65805	-0.561081	0.12124	1	-	-	-	+	+	+	Promoter (2-3kb)	16059878	16071669	11792	+	725495	XM_001121332.5
NC_037638.1	16070181	16071025	16070589;16070554;16070601;16070887	233	169	227	163	189	376	273	93	240	119	186	120	10.9793	9.2191	10.6567	8.8478	9.3898	19.932	12.4341	5.07976	14.0214	6.6804	8.63192	5.05296	1.19093	1.20445	0.471092	2.44777	2.09889	1.70829	-1.12572	0.0255913	1	-	-	-	+	+	+	3' UTR	16059878	16071669	11792	+	725495	XM_001121332.5
NC_037641.1	8797843	8798272	8797974;8798058;8798146	120	101	79	67	115	73	149	72	137	72	105	76	5.67732	5.53146	3.7392	3.6686	5.73272	3.91238	6.807	3.94492	8.02884	4.06391	4.89296	3.21552	1.02637	1.01924	1.46528	1.72551	1.97564	1.52167	-0.572993	0.0452887	1	-	-	-	+	+	+	Distal Intergenic	8805889	8809062	3174	+	725509	NM_001270829.1
NC_037651.1	8508247	8509235	8508439;8508571;8509082;8508470	228	182	153	177	354	74	233	108	178	115	324	198	10.7447	9.92409	7.19796	9.6031	17.5441	3.96525	10.6189	5.89036	10.4142	6.45772	15.002	8.31024	1.08269	0.749545	4.42446	1.80276	1.61267	1.80524	0.261164	0.796402	1	-	-	-	+	+	+	Distal Intergenic	8532329	8618591	86263	+	725754	XM_016916010.2
NC_037640.1	7417695	7419110	7417993;7418049;7418466;7418952;7417905;7418928	287	233	333	238	220	499	444	148	325	150	262	240	13.513	12.6898	15.6112	12.8941	10.9218	26.435	20.1941	8.05196	18.9667	8.40617	12.1401	10.0642	1.06487	1.21072	0.413157	2.50797	2.25628	1.20627	-1.15092	0.0929393	1	-	-	-	+	+	+	Intron (XM_026439645.1/725792, intron 1 of 7)	7423893	7456091	32199	+	725792	XM_026439646.1
NC_037640.1	7416565	7417283	7416740;7417130;7416791;7416760;7417026	123	152	140	120	126	224	290	97	223	110	188	132	5.81808	8.29719	6.59034	6.52795	6.27634	11.8957	13.2056	5.29592	13.0323	6.17937	8.72424	5.55408	0.701211	1.00956	0.527614	2.49354	2.109	1.57078	-1.46359	0.0221634	1	-	-	-	+	+	+	Intron (XM_026439645.1/725792, intron 1 of 7)	7423893	7456091	32199	+	725792	XM_026439646.1
NC_037644.1	13361178	13362459	13361303;13361557;13361892;13362280;13361449;13362041	365	267	322	215	256	726	370	160	340	136	226	215	17.1727	14.5336	15.097	11.6532	12.7009	38.4365	16.836	8.70044	19.8394	7.62679	10.4783	9.02016	1.18159	1.29552	0.330439	1.93507	2.60128	1.16165	-1.02115	0.141483	1	-	-	-	+	+	+	Promoter (<=1kb)	13361007	13366896	5890	+	726050	XM_026441768.1
NC_037647.1	5150652	5151089	5150804;5150821;5150830	121	95	125	82	116	91	119	48	111	71	130	91	5.72424	5.20608	5.88924	4.47785	5.78214	4.86404	5.4456	2.64796	6.51616	4.00824	6.04696	3.84192	1.09953	1.31519	1.18875	2.05653	1.62569	1.57394	-0.54462	0.053439	1	-	-	-	+	+	+	Intron (XM_006562495.3/726179, intron 2 of 3)	5135660	5195081	59422	+	726179	XM_001121936.5
NC_037650.1	4366442	4367213	4366657;4367000;4366656;4366743	165	131	179	167	109	217	290	85	164	122	154	100	7.78872	7.15836	8.4132	9.0636	5.4362	11.5257	13.2056	4.64744	9.5997	6.84741	7.1548	4.21776	1.08806	0.92824	0.471659	2.84148	1.40195	1.69635	-1.25545	0.104578	1	-	-	-	+	+	+	Promoter (2-3kb)	4370049	4386313	16265	+	726456	XM_026444776.1
NC_037652.1	7777818	7778509	7777993;7778343;7777979;7778395;7778204	189	119	180	97	124	214	253	96	205	107	182	129	8.9148	6.5076	8.45994	5.2871	6.1775	11.3671	11.5265	5.24188	11.9851	6.01236	8.44728	5.4288	1.36991	1.60011	0.543454	2.19892	1.99341	1.55601	-0.710251	0.132497	1	-	-	-	+	+	+	Promoter (<=1kb)	7778272	7791835	13564	+	726476	XM_006563576.3
NC_037647.1	6581846	6582300	6582055;6582077;6582144	110	98	91	63	76	122	221	67	105	47	178	97	5.20812	5.36877	4.30008	3.4528	3.80534	6.50301	10.0744	3.67472	6.16708	2.67216	8.26264	4.09248	0.970077	1.24539	0.585166	2.74154	2.3079	2.01898	-1.33564	0.00762358	1	-	-	-	+	+	+	Intron (XR_003305525.1/113219060, intron 2 of 4)	6587620	6589278	1659	-	726592	XM_006562785.3
NC_037647.1	6576882	6577554	6577307;6577262;6577267	133	82	150	89	154	91	210	69	114	97	264	113	6.28728	4.50109	7.05774	4.8555	7.6601	4.86404	9.57518	3.7828	6.6907	5.45566	12.2324	4.76064	1.39683	1.45356	1.57484	2.53124	1.22638	2.56949	-0.515792	0.286764	1	-	-	-	+	+	+	Intron (XR_003305525.1/113219060, intron 2 of 4)	6587620	6589278	1659	-	726592	XM_006562785.3
NC_037647.1	6586997	6587580	6587321;6587360;6587422	176	130	153	118	125	76	234	78	145	69	160	91	8.30484	7.10413	7.19796	6.42005	6.22692	4.07099	10.6643	4.26916	8.49428	3.8969	7.43176	3.84192	1.16902	1.12117	1.52958	2.49799	2.17975	1.93439	-0.791629	0.0124051	1	-	-	-	+	+	+	Promoter (1-2kb)	6587620	6589278	1659	-	726592	XM_006562785.3
NC_037638.1	1115830	1116216	1115992;1116003;1116016	112	73	122	68	129	91	137	50	91	44	114	90	5.30196	4.01302	5.74902	3.72255	6.4246	4.86404	6.26244	2.75604	5.35256	2.50515	5.3084	3.80016	1.32119	1.54438	1.32084	2.27226	2.13662	1.39689	-0.471777	0.178966	1	-	-	-	+	+	+	Intron (XM_026439854.1/726886, intron 1 of 7)	1056771	1147819	91049	-	726886	XM_026439854.1
NC_037638.1	13449032	13449463	13449181;13449203;13449217	95	112	102	97	80	115	111	58	92	55	111	87	4.50432	6.12799	4.81422	5.2871	4.00302	6.13292	5.08256	3.18836	5.41074	3.11752	5.16992	3.67488	0.73504	0.91056	0.65271	1.5941	1.73559	1.40683	-1.04325	0.0031064	1	-	-	-	+	+	+	Intron (XM_026445792.1/725885, intron 1 of 5)	13337080	13338460	1381	-	727243	XM_001122953.5
NC_037639.1	8424598	8424975	8424770;8424819;8424725	122	89	132	77	103	104	150	67	110	47	100	73	5.77116	4.8807	6.21642	4.2081	5.13968	5.55135	6.85238	3.67472	6.45798	2.67216	4.66216	3.09024	1.18245	1.47725	0.925843	1.86474	2.41676	1.50867	-0.691416	0.0899181	1	-	-	-	+	+	+	Distal Intergenic	8167809	8221278	53470	-	727308	XM_026439066.1
NC_037639.1	8384501	8385114	8384620;8384939;8384745;8384767	172	117	165	110	176	114	160	77	106	56	189	134	8.11716	6.39914	7.75884	5.98845	8.74734	6.08005	7.30618	4.21512	6.22526	3.17319	8.7704	5.6376	1.26848	1.29563	1.4387	1.73333	1.96183	1.5557	-0.39154	0.0538429	1	-	-	-	+	+	+	Distal Intergenic	8167809	8221278	53470	-	727308	XM_026439066.1
NC_037642.1	10828312	10828745	10828509;10828513;10828511	134	80	131	82	148	73	194	58	118	76	174	74	6.3342	4.39263	6.16968	4.47785	7.36358	3.91238	8.8491	3.18836	6.92342	4.28659	8.078	3.132	1.44201	1.37782	1.88212	2.77544	1.61513	2.57918	-0.567849	0.15762	1	-	-	-	+	+	+	Distal Intergenic	10833129	10837975	4847	+	727423	XM_001123131.5
NC_037642.1	10827563	10828158	10827904;10827850;10827945	112	108	126	87	139	148	299	86	154	76	178	118	5.30196	5.91107	5.93598	4.7476	6.9188	7.87763	13.614	4.70148	9.0179	4.28659	8.26264	4.96944	0.896954	1.25031	0.878284	2.89568	2.10375	1.66269	-1.13878	0.0659617	1	-	-	-	+	+	+	Distal Intergenic	10833129	10837975	4847	+	727423	XM_001123131.5
NC_037651.1	10407970	10408999	10408128;10408607;10408309;10408292	184	147	147	140	225	128	242	156	177	121	363	179	8.6802	8.02604	6.91752	7.60695	11.1689	6.82023	11.0273	8.48428	10.356	6.79174	16.8022	7.5168	1.0815	0.909368	1.63761	1.29973	1.52479	2.23529	-0.479716	0.25677	1	-	-	-	+	+	+	Downstream (<1kb)	10404383	10404405	23	+	732515	732515
NC_037651.1	4361625	4362201	4361739;4362145;4361841;4361942	212	142	206	129	145	207	190	95	145	86	177	105	9.99396	7.75489	9.67518	7.0135	7.21532	10.997	8.66758	5.18784	8.49428	4.84329	8.21648	4.42656	1.28873	1.37951	0.656117	1.67075	1.75382	1.85618	-0.667669	0.0961552	1	-	-	-	+	+	+	Distal Intergenic	4373892	4376854	2963	-	100576122	XR_408654.2
NC_037642.1	8981009	8981460	8981262;8981228;8981182	152	121	164	81	160	193	200	65	141	76	119	73	7.17876	6.61606	7.7121	4.4239	7.95662	10.2568	9.12138	3.56664	8.26156	4.28659	5.5392	3.09024	1.08505	1.74328	0.775741	2.55742	1.9273	1.79248	-0.800493	0.0760215	1	-	-	-	+	+	+	Intron (XM_006565568.3/100576129, intron 1 of 6)	8898314	9055619	157306	-	100576129	XM_006565568.3
NC_037642.1	9095779	9096576	9095997;9095979;9096455;9096441	252	184	238	137	245	214	227	104	189	94	227	126	11.8708	10.0326	11.1709	7.4451	12.1573	11.3671	10.3466	5.6742	11.0542	5.28865	10.5245	5.30352	1.18322	1.50044	1.06952	1.82345	2.09017	1.98444	-0.652128	0.0144171	1	-	-	-	+	+	+	Intron (XM_003250637.4/100576129, intron 1 of 7)	8898314	9108208	209895	-	100576129	XM_003250637.4
NC_037652.1	8074385	8074868	8074553;8074559;8074558	92	110	98	70	84	59	102	46	89	53	131	90	4.36356	6.01953	4.62726	3.83045	4.2007	3.1722	4.67414	2.53988	5.2362	3.00618	6.09312	3.80016	0.7249	1.20802	1.32422	1.8403	1.74181	1.60339	-0.670875	0.0585046	1	-	-	-	+	+	+	Promoter (<=1kb)	8072022	8074710	2689	-	100576224	XM_006563634.3
NC_037647.1	2460902	2461294	2461036;2461031;2461116	126	91	113	77	136	28	131	60	92	66	144	85	5.95884	4.98916	5.32836	4.2081	6.77054	1.53323	5.99016	3.29644	5.41074	3.72989	6.6932	3.59136	1.19436	1.26622	4.41587	1.81716	1.45064	1.8637	0.422282	0.639821	1	-	-	-	+	+	+	Intron (XM_006559228.2/100576247, intron 1 of 1)	2470090	2495006	24917	+	100576247	XM_006559225.3
NC_037647.1	2425844	2426335	2426023;2426030;2426004;2426112	102	110	105	89	158	20	162	67	111	75	152	87	4.83276	6.01953	4.95444	4.8555	7.85778	1.11027	7.39694	3.67472	6.51616	4.23092	7.06248	3.67488	0.802847	1.02038	7.07736	2.01293	1.54013	1.92183	0.701072	0.634787	1	-	-	-	+	+	+	Intron (XM_006559228.2/100576247, intron 1 of 1)	2443655	2447947	4293	+	100576247	XR_003305538.1
NC_037638.1	21510770	21511473	21510907;21510944;21511325;21511185	210	171	226	123	206	176	224	70	178	91	159	131	9.90012	9.32756	10.61	6.6898	10.2299	9.35799	10.2105	3.83684	10.4142	5.12164	7.3856	5.51232	1.06138	1.586	1.09317	2.66117	2.03337	1.33984	-0.689954	0.172427	1	-	-	-	+	+	+	Promoter (1-2kb)	21512675	21531869	19195	+	100576454	XM_006571377.3
NC_037642.1	6814731	6815210	6814930;6815038;6814936	150	138	167	124	124	217	198	66	144	68	121	83	7.08492	7.53797	7.85232	6.74375	6.1775	11.5257	9.03062	3.62068	8.4361	3.84123	5.63152	3.50784	0.939898	1.16438	0.535976	2.49418	2.1962	1.60541	-1.25371	0.0229676	1	-	-	-	+	+	+	Distal Intergenic	6830346	6833823	3478	-	100576657	XR_120169.4
NC_037639.1	13859389	13860197	13859798;13859782;13859772	111	103	138	124	118	121	234	99	113	92	310	117	5.25504	5.63992	6.49686	6.74375	5.88098	6.45014	10.6643	5.404	6.63252	5.17731	14.3558	4.92768	0.931758	0.96339	0.91176	1.97341	1.28107	2.9133	-1.13577	0.141263	1	-	-	-	+	+	+	3' UTR	13866778	13868969	2192	-	100577106	XM_003251267.4
NC_037640.1	3870285	3870776	3870394;3870463;3870596;3870606	124	135	116	94	89	142	146	52	99	63	133	80	5.865	7.37528	5.46858	5.12525	4.4478	7.56041	6.67086	2.86412	5.818	3.56288	6.18544	3.38256	0.795224	1.06699	0.588301	2.32911	1.63295	1.82863	-1.24065	0.0150882	1	-	-	-	+	+	+	Distal Intergenic	3877961	3952729	74769	+	100577278	XR_003304414.1
NC_037643.1	3905292	3905771	3905400;3905528;3905545	206	135	168	125	147	129	211	65	143	62	144	98	9.71244	7.37528	7.89906	6.7977	7.31416	6.8731	9.62056	3.56664	8.37792	3.50721	6.6932	4.13424	1.31689	1.16202	1.06417	2.69737	2.38877	1.61897	-0.920256	0.0746752	1	-	-	-	+	+	+	Intron (XM_026441432.1/100577393, intron 1 of 10)	3804323	3897377	93055	-	100577393	XM_026441430.1
NC_037644.1	3385439	3385862	3385618;3385669;3385670	108	77	25	46	90	11	165	51	99	42	146	109	5.11428	4.22994	1.21524	2.53565	4.49722	0.63444	7.53308	2.81008	5.818	2.39381	6.78552	4.5936	1.20907	0.479262	7.08849	2.68074	2.43044	1.47717	0.413783	0.762312	1	-	-	-	+	+	+	Promoter (2-3kb)	3383240	3388325	5086	-	100577507	XR_001703714.2
NC_037639.1	13261712	13262315	13261897;13261901;13262236;13261962	175	161	179	101	151	197	265	75	177	93	168	113	8.25792	8.78526	8.4132	5.5029	7.51184	10.4683	12.0711	4.10704	10.356	5.23298	7.80104	4.76064	0.939974	1.52887	0.71758	2.93912	1.97899	1.63865	-1.04105	0.082856	1	-	-	-	+	+	+	Intron (XM_006569010.3/410831, intron 1 of 8)	13241841	13243302	1462	+	100577606	XM_003251251.4
NC_037639.1	10749868	10750299	10750088;10750106;10750143	128	120	133	97	117	144	146	75	106	48	131	81	6.05268	6.56183	6.26316	5.2871	5.83156	7.66615	6.67086	4.10704	6.22526	2.72783	6.09312	3.42432	0.922407	1.18461	0.76069	1.62425	2.28213	1.77937	-0.987451	0.0225222	1	-	-	-	+	+	+	Intron (XR_003304109.1/100577827, intron 3 of 3)	10765455	10807157	41703	-	100577827	XM_026438846.1
NC_037639.1	5381176	5381593	5381375;5381404;5381414	135	101	134	83	126	92	145	63	105	68	98	73	6.38112	5.53146	6.3099	4.5318	6.27634	4.91691	6.62548	3.45856	6.16708	3.84123	4.56984	3.09024	1.15361	1.39236	1.27648	1.91568	1.6055	1.4788	-0.387423	0.074412	1	-	-	-	+	+	+	Intron (XM_003249771.4/100578420, intron 3 of 4)	5375813	5383658	7846	+	100578420	XM_006561079.3
NC_037642.1	11554487	11555039	11554794;11554782;11554848	143	110	148	105	157	152	130	73	148	88	163	122	6.75648	6.01953	6.96426	5.7187	7.80836	8.08911	5.94478	3.99896	8.66882	4.95463	7.57024	5.13648	1.12243	1.2178	0.965293	1.48658	1.74964	1.47382	-0.51086	0.0169764	1	-	-	-	+	+	+	Intron (XM_026441041.1/411116, intron 2 of 12)	11477765	11492653	14889	+	100578476	XM_003251068.4
NC_037638.1	303620	304001	303781;303822;303874	133	96	124	58	123	63	131	71	91	59	147	93	6.28728	5.26031	5.8425	3.18305	6.12808	3.38368	5.99016	3.89088	5.35256	3.3402	6.83168	3.92544	1.19523	1.8355	1.81107	1.53954	1.60247	1.74036	-0.012036	0.955426	1	-	-	-	+	+	+	Intron (XM_026446225.1/551203, intron 30 of 53)	256975	325770	68796	-	100578621	XM_026446241.1
NC_037640.1	5629667	5630082	5629735;5629879;5629910	132	112	125	94	123	100	153	56	136	67	104	65	6.24036	6.12799	5.88924	5.12525	6.12808	5.33987	6.98852	3.08028	7.97066	3.78556	4.8468	2.75616	1.01834	1.14906	1.14761	2.26879	2.10554	1.75853	-0.887549	0.0183486	1	-	-	-	+	+	+	Promoter (<=1kb)	5629464	5635018	5555	+	100578670	XR_408913.3
NC_037645.1	3350578	3351242	3350678;3351017;3351008	142	125	108	117	136	83	238	70	126	72	177	117	6.70956	6.83298	5.09466	6.3661	6.77054	4.44108	10.8458	3.83684	7.38886	4.06391	8.21648	4.92768	0.981938	0.80028	1.52453	2.82675	1.81817	1.66741	-0.932762	0.092021	1	-	-	-	+	+	+	Distal Intergenic	3315172	3332692	17521	-	100578698	XR_003305150.1
NC_037642.1	9692432	9692760	9692593;9692531;9692619	119	94	121	87	103	132	129	52	91	43	102	78	5.6304	5.15185	5.70228	4.7476	5.13968	7.03171	5.8994	2.86412	5.35256	2.44948	4.75448	3.29904	1.09289	1.20109	0.730929	2.05976	2.18518	1.44117	-0.910553	0.0398074	1	-	-	-	+	+	+	Distal Intergenic	9696784	9699394	2611	+	100578718	XM_016912295.2
NC_037647.1	9449450	9449891	9449634;9449725;9449729	179	135	152	98	161	151	150	69	118	61	155	96	8.4456	7.37528	7.15122	5.34105	8.00604	8.03624	6.85238	3.7828	6.92342	3.45154	7.20096	4.05072	1.14512	1.33892	0.996242	1.81146	2.00589	1.7777	-0.684947	0.00600401	1	-	-	-	+	+	+	Intron (XM_026443234.1/410204, intron 1 of 15)	9453893	9453913	21	-	100629029	100629029
NC_037647.1	1216697	1217205	1216944;1216908;1216919	116	122	117	70	94	95	199	73	116	73	140	96	5.48964	6.67029	5.51532	3.83045	4.6949	5.07552	9.076	3.99896	6.80706	4.11958	6.50856	4.05072	0.822999	1.43986	0.925009	2.26959	1.65237	1.60677	-0.794354	0.0535663	1	-	-	-	+	+	+	Promoter (2-3kb)	1220185	1220265	81	+	100629030	NR_039497.1
NC_037639.1	14937083	14937733	14937273;14937287;14937579;14937568	190	135	101	98	134	100	200	88	200	94	161	97	8.96172	7.37528	4.76748	5.34105	6.6717	5.33987	9.12138	4.80956	11.6942	5.28865	7.47792	4.09248	1.2151	0.892611	1.24941	1.89651	2.21119	1.82723	-0.822005	0.00635961	1	-	-	-	+	+	+	Promoter (2-3kb)	14939921	14939942	22	-	100629061	100629061
NC_037638.1	23414971	23415327	23415151;23415139;23415108	131	80	125	61	94	132	133	52	131	61	114	82	6.19344	4.39263	5.88924	3.3449	4.6949	7.03171	6.08092	2.86412	7.67976	3.45154	5.3084	3.46608	1.40996	1.76066	0.667675	2.12314	2.22502	1.53153	-0.615273	0.164554	1	-	-	-	+	+	+	Distal Intergenic	23436246	23436741	496	-	102653777	XR_412192.3
NC_037641.1	647961	648481	648119;648097;648183	88	69	88	85	117	92	122	60	97	69	181	95	4.17588	3.7961	4.15986	4.6397	5.83156	4.91691	5.58174	3.29644	5.70164	3.8969	8.40112	4.00896	1.10004	0.89658	1.18602	1.69326	1.46312	2.09559	-0.722632	0.046996	1	-	-	-	+	+	+	Distal Intergenic	631661	634439	2779	-	102653803	XM_006557917.3
NC_037638.1	8763906	8764381	8764112;8764164;8764128	150	110	154	88	159	177	205	64	133	73	126	78	7.08492	6.01953	7.2447	4.80155	7.9072	9.41086	9.34828	3.5126	7.79612	4.11958	5.86232	3.29904	1.17699	1.50883	0.840221	2.66136	1.89246	1.77698	-0.844339	0.0574617	1	-	-	-	+	+	+	Intron (XM_026443702.1/410732, intron 2 of 5)	8740243	8742888	2646	+	102653841	XR_003305619.1
NC_037638.1	8860278	8860549	8860419;8860412;8860416	100	60	105	56	79	100	106	47	84	41	98	57	4.73892	3.30803	4.95444	3.07515	3.9536	5.33987	4.85566	2.59392	4.9453	2.33814	4.56984	2.42208	1.43255	1.61112	0.740393	1.87194	2.11506	1.88674	-0.634342	0.109841	1	-	-	-	+	+	+	Intron (XM_026443702.1/410732, intron 2 of 5)	8740243	8742888	2646	+	102653841	XR_003305619.1
NC_037640.1	2853462	2853942	2853723;2853800;2853825	99	136	137	130	120	166	161	54	101	51	123	75	4.692	7.42951	6.45012	7.06745	5.97982	8.82929	7.35156	2.9722	5.93436	2.89484	5.72384	3.17376	0.631536	0.912652	0.677271	2.47344	2.04998	1.80349	-1.50999	0.00990413	1	-	-	-	+	+	+	Exon (XR_003304358.1/102654134, exon 2 of 4)	2840754	2857935	17182	-	102654134	XR_003304358.1
NC_037643.1	16172589	16173005	16172754;16172842;16172863	129	76	112	87	124	143	123	68	92	62	125	85	6.0996	4.17571	5.28162	4.7476	6.1775	7.61328	5.62712	3.72876	5.41074	3.50721	5.81616	3.59136	1.46073	1.11248	0.811411	1.50911	1.54275	1.61949	-0.464842	0.145835	1	-	-	-	+	+	+	Intron (XM_016912683.2/724442, intron 9 of 15)	16180575	16184980	4406	-	102654144	XR_003304876.1
NC_037638.1	13605965	13606464	13606145;13606177;13606286	152	102	112	73	194	109	150	65	135	57	155	79	7.17876	5.58569	5.28162	3.9923	9.6369	5.8157	6.85238	3.56664	7.91248	3.22886	7.20096	3.3408	1.28521	1.32295	1.65705	1.92124	2.45055	2.15546	-0.61386	0.0197658	1	-	-	-	+	+	+	Promoter (<=1kb)	13604428	13606546	2119	-	102654266	XR_411914.3
NC_037644.1	2167687	2168245	2167952;2168056;2167977	162	106	151	89	96	222	211	70	148	69	119	75	7.64796	5.80261	7.10448	4.8555	4.79374	11.79	9.62056	3.83684	8.66882	3.8969	5.5392	3.17376	1.31802	1.46318	0.406594	2.50742	2.22454	1.74531	-1.02283	0.0594428	1	-	-	-	+	+	+	Intron (XM_006559806.3/411748, intron 1 of 15)	2155540	2159905	4366	-	102654659	XR_408525.3
NC_037638.1	1721854	1722383	1722225;1722145;1722166	111	127	120	104	105	55	152	94	112	91	171	99	5.25504	6.94144	5.65554	5.66475	5.23852	2.96072	6.94314	5.1338	6.57434	5.12164	7.93952	4.176	0.757053	0.998374	1.76934	1.35244	1.28364	1.90123	-0.364307	0.412967	1	-	-	-	+	+	+	Intron (XM_006558575.3/113218523, intron 1 of 1)	1706523	1709448	2926	-	102654759	XR_407921.3
NC_037649.1	5266815	5267176	5267032;5266969;5267007	117	93	86	46	92	23	175	82	93	54	135	79	5.53656	5.09762	4.06638	2.53565	4.59606	1.26888	7.98688	4.48532	5.46892	3.06185	6.27776	3.3408	1.08611	1.60368	3.62214	1.78067	1.78615	1.87912	0.2129	0.744989	1	-	-	-	+	+	+	Downstream (<1kb)	5268085	5273816	5732	-	102654806	XR_003305893.1
NC_037638.1	6378492	6378901	6378647;6378673;6378721	89	119	94	81	99	93	145	78	97	55	142	52	4.2228	6.5076	4.4403	4.4239	4.942	4.96978	6.62548	4.26916	5.70164	3.11752	6.60088	2.21328	0.648903	1.00371	0.99441	1.55194	1.8289	2.9824	-1.26539	0.0969613	1	-	-	-	+	+	+	Promoter (<=1kb)	6376475	6377870	1396	-	102655155	XR_409626.3
NC_037653.1	4038664	4039112	4038810;4038785;4038988	116	83	97	55	122	66	101	52	104	53	119	88	5.48964	4.55532	4.58052	3.0212	6.07866	3.54229	4.62876	2.86412	6.1089	3.00618	5.5392	3.71664	1.20511	1.51613	1.71603	1.61612	2.03211	1.49038	-0.211711	0.350516	1	-	-	-	+	+	+	Distal Intergenic	4055701	4061959	6259	-	102655316	XR_003306249.1
NC_037640.1	7535113	7535725	7535257;7535281;7535588	115	130	140	97	139	120	110	81	113	88	155	98	5.44272	7.10413	6.59034	5.2871	6.9188	6.39727	5.03718	4.43128	6.63252	4.95463	7.20096	4.13424	0.766135	1.24649	1.08152	1.13673	1.33865	1.74179	-0.44673	0.178061	1	-	-	-	+	+	+	Distal Intergenic	7569798	7592745	22948	+	102655392	XM_006563879.3
NC_037642.1	3377529	3377998	3377727;3377686;3377864	70	94	49	77	89	43	160	61	82	53	115	76	3.33132	5.15185	2.337	4.2081	4.4478	2.32628	7.30618	3.35048	4.82894	3.00618	5.35456	3.21552	0.646626	0.555358	1.91198	2.18064	1.60634	1.66522	-0.808086	0.209767	1	-	-	-	+	+	+	Distal Intergenic	3386799	3433747	46949	+	102656027	XM_026440825.1
NC_037643.1	14982345	14982841	14982573;14982687;14982685	133	104	113	88	145	110	160	74	101	74	131	73	6.28728	5.69415	5.32836	4.80155	7.21532	5.86857	7.30618	4.053	5.93436	4.17525	6.09312	3.09024	1.10416	1.10972	1.22949	1.80266	1.42132	1.97173	-0.593501	0.0619546	1	-	-	-	+	+	+	Exon (XM_006570540.3/409707, exon 3 of 6)	14977954	14981533	3580	+	102656121	XR_411902.3
NC_037643.1	14971662	14972089	14971839;14971941;14971842	101	71	91	64	133	109	119	52	143	58	135	71	4.78584	3.90456	4.30008	3.50675	6.62228	5.8157	5.4456	2.86412	8.37792	3.28453	6.27776	3.00672	1.22571	1.22623	1.13869	1.90132	2.55072	2.08791	-0.865044	0.0339745	1	-	-	-	+	+	+	Intron (XM_006570540.3/409707, intron 1 of 5)	14977949	14981533	3585	+	102656121	XR_411901.3
NC_037639.1	10632084	10633164	10632340;10632753;10632815;10632882	261	200	306	192	224	406	300	125	217	117	216	157	12.293	10.9002	14.3492	10.4123	11.1195	21.5181	13.6594	6.80904	12.6832	6.56906	10.0167	6.59808	1.12778	1.3781	0.516751	2.00607	1.93075	1.51812	-0.851759	0.0660481	1	-	-	-	+	+	+	Distal Intergenic	10576694	10599530	22837	+	102656216	XM_026438974.1
NC_037639.1	10638785	10639122	10639016;10638983;10638986	94	85	79	60	94	146	117	43	89	44	99	54	4.4574	4.66378	3.7392	3.29095	4.6949	7.77189	5.35484	2.37776	5.2362	2.50515	4.616	2.2968	0.955748	1.13621	0.604087	2.25205	2.09017	2.00975	-1.23636	0.00722022	1	-	-	-	+	+	+	Distal Intergenic	10576694	10599530	22837	+	102656216	XM_026438974.1
NC_037638.1	8871739	8872212	8871925;8871951;8871915	124	118	99	67	156	20	180	72	100	62	151	102	5.865	6.45337	4.674	3.6686	7.75894	1.11027	8.21378	3.94492	5.87618	3.50721	7.01632	4.30128	0.908827	1.27406	6.98834	2.08212	1.67546	1.63122	0.767152	0.587739	1	-	-	-	+	+	+	Intron (XM_026443702.1/410732, intron 2 of 5)	8985939	8989096	3158	+	102656489	XM_016917606.2
NC_037652.1	4615302	4615932	4615448;4615518;4615540;4615835	186	169	119	111	169	74	148	95	139	81	187	111	8.77404	9.2191	5.6088	6.0424	8.4014	3.96525	6.76162	5.18784	8.1452	4.56494	8.67808	4.67712	0.951724	0.92824	2.11876	1.30336	1.7843	1.85543	-0.305874	0.521091	1	-	-	-	+	+	+	Promoter (2-3kb)	4612494	4615005	2512	+	102656509	XR_003306131.1
NC_037638.1	12555232	12555702	12555293;12555523;12555523	139	120	114	80	111	176	114	59	100	48	102	74	6.5688	6.56183	5.3751	4.36995	5.53504	9.35799	5.2187	3.2424	5.87618	2.72783	4.75448	3.132	1.00106	1.23001	0.591477	1.60952	2.15416	1.51803	-0.904004	0.0398547	1	-	-	-	+	+	+	Promoter (<=1kb)	12550828	12555380	4553	-	102656611	XM_016914792.2
NC_037647.1	2519938	2520366	2520123;2520157;2520329	120	95	119	71	113	143	164	54	108	70	98	68	5.67732	5.20608	5.6088	3.8844	5.63388	7.61328	7.4877	2.9722	6.34162	3.95257	4.56984	2.88144	1.09052	1.44393	0.740007	2.51925	1.60443	1.58596	-0.802143	0.103202	1	-	-	-	+	+	+	Distal Intergenic	2529475	2539866	10392	-	102656656	XR_001704350.2
NC_037638.1	4082442	4082870	4082649;4082657;4082626	106	96	103	48	115	122	135	71	120	65	112	71	5.02044	5.26031	4.86096	2.64355	5.73272	6.50301	6.17168	3.89088	7.03978	3.67422	5.21608	3.00672	0.9544	1.8388	0.881549	1.58619	1.91599	1.73481	-0.511093	0.227252	1	-	-	-	+	+	+	Intron (XM_026442676.1/408618, intron 2 of 15)	4100313	4103547	3235	+	102656903	XR_003305308.1
NC_037648.1	1880407	1881242	1880547;1880971;1880990;1881038	272	181	268	159	196	381	296	97	203	97	186	162	12.8092	9.86986	12.5731	8.632	9.73574	20.1963	13.4779	5.29592	11.8687	5.45566	8.63192	6.80688	1.29781	1.45657	0.482056	2.54496	2.17548	1.26812	-0.887804	0.134991	1	-	-	-	+	+	+	Intron (XM_006558939.3/412839, intron 3 of 5)	1896068	1898975	2908	+	102656919	XR_408115.3
NC_037644.1	5177391	5177836	5177548;5177537;5177583	128	120	102	104	127	107	136	66	91	55	138	86	6.05268	6.56183	4.81422	5.66475	6.32576	5.70996	6.21706	3.62068	5.35256	3.11752	6.41624	3.63312	0.922407	0.849856	1.10785	1.7171	1.71693	1.76604	-0.852407	0.00757526	1	-	-	-	+	+	+	Promoter (<=1kb)	5177544	5177622	79	+	104794353	NR_127336.1
NC_037640.1	2843146	2843524	2843326;2843358;2843365	137	79	120	70	134	48	147	50	106	60	173	69	6.47496	4.3384	5.65554	3.83045	6.6717	2.59063	6.71624	2.75604	6.22526	3.39587	8.03184	2.9232	1.49248	1.47647	2.57532	2.43692	1.83319	2.74762	-0.340007	0.343188	1	-	-	-	+	+	+	Exon (XR_003304358.1/102654134, exon 4 of 4)	2831910	2834339	2430	+	107964187	XR_003304413.1
NC_037642.1	10366818	10367274	10366967;10367029;10367020	132	96	139	90	171	137	144	69	137	69	167	85	6.24036	5.26031	6.5436	4.90945	8.50024	7.29606	6.5801	3.7828	8.02884	3.8969	7.75488	3.59136	1.18631	1.33286	1.16505	1.73948	2.06031	2.15932	-0.69374	0.0157286	1	-	-	-	+	+	+	Promoter (1-2kb)	10368499	10374565	6067	+	107964408	XR_001702869.2
NC_037638.1	12973676	12974136	12973897;12973877;12974015	169	124	138	90	172	199	178	57	154	50	123	93	7.9764	6.77875	6.49686	4.90945	8.54966	10.574	8.12302	3.13432	9.0179	2.83917	5.72384	3.92544	1.17668	1.32334	0.808555	2.59164	3.17625	1.45814	-1.12699	0.112161	1	-	-	-	+	+	+	Intron (XM_026445379.1/410718, intron 13 of 22)	12977554	12981652	4099	+	107964845	XM_016913580.2
NC_037645.1	7865186	7866407	7865277;7865470;7866213;7865739;7866170	347	295	328	217	262	457	415	152	348	145	224	185	16.3282	16.0521	15.3775	11.7611	12.9975	24.2145	18.8781	8.26812	20.3048	8.12782	10.386	7.76736	1.0172	1.30749	0.536765	2.28324	2.49819	1.33713	-1.09644	0.0729928	1	-	-	-	+	+	+	Distal Intergenic	7855665	7860968	5304	+	107964914	XR_003305223.1
NC_037647.1	10117218	10117656	10117406;10117422;10117429	97	52	77	74	91	22	169	45	80	56	129	43	4.59816	2.87419	3.64572	4.04625	4.54664	1.21601	7.7146	2.48584	4.71258	3.17319	6.0008	1.83744	1.59981	0.901012	3.73898	3.10342	1.48512	3.26585	-0.331998	0.631367	1	-	-	-	+	+	+	Promoter (1-2kb)	10115999	10119266	3268	+	107965038	XM_016914303.2
NC_037650.1	6131075	6131590	6131218;6131259;6131217;6131445	175	156	185	125	161	143	187	77	181	72	174	93	8.25792	8.51411	8.69364	6.7977	8.00604	7.61328	8.53144	4.21512	10.5888	4.06391	8.078	3.92544	0.96991	1.27891	1.05159	2.02401	2.60557	2.05786	-1.01881	0.0136094	1	-	-	-	+	+	+	Promoter (2-3kb)	6126502	6128160	1659	-	107965418	XR_003305968.1
NC_037638.1	11277605	11278084	11277760;11277802;11277918	100	114	113	72	78	134	156	84	88	53	111	103	4.73892	6.23645	5.32836	3.93835	3.90418	7.13745	7.12466	4.5934	5.17802	3.00618	5.16992	4.34304	0.759875	1.35294	0.546999	1.55106	1.72246	1.19039	-0.746983	0.116121	1	-	-	-	+	+	+	Intron (XM_006569607.3/410724, intron 2 of 7)	11284595	11285588	994	+	107965530	XR_001705587.2
NC_037652.1	2129611	2130018	2129803;2129838;2129887	143	87	92	64	96	87	98	61	105	62	104	72	6.75648	4.77224	4.34682	3.50675	4.79374	4.65256	4.49262	3.35048	6.16708	3.50721	4.8468	3.04848	1.41579	1.23956	1.03034	1.34089	1.7584	1.58991	-0.347406	0.112549	1	-	-	-	+	+	+	Distal Intergenic	2148237	2149478	1242	-	107965573	XR_001705651.2
NC_037652.1	1331528	1331920	1331775;1331741;1331668;1331706	85	75	90	63	108	95	132	75	108	53	105	69	4.03512	4.12148	4.25334	3.4528	5.38678	5.07552	6.03554	4.10704	6.34162	3.00618	4.89296	2.9232	0.979046	1.23185	1.06133	1.46956	2.10953	1.67384	-0.682849	0.0576973	1	-	-	-	+	+	+	Intron (XM_026445283.1/724047, intron 4 of 8)	1325718	1326842	1125	+	107965615	XR_001705723.2
NC_037638.1	12122848	12123307	12122985;12123020;12123086	136	83	104	80	140	124	133	77	98	56	159	91	6.42804	4.55532	4.9077	4.36995	6.96822	6.60875	6.08092	4.21512	5.75982	3.17319	7.3856	3.84192	1.41111	1.12306	1.05439	1.44264	1.81515	1.92237	-0.529596	0.0474854	1	-	-	-	+	+	+	Promoter (1-2kb)	12120915	12123998	3084	+	107965622	XR_001705753.2
NC_037638.1	12127514	12127932	12127676;12127673;12127688	137	84	123	74	166	177	139	55	94	55	131	100	6.47496	4.60955	5.79576	4.04625	8.25314	9.41086	6.3532	3.02624	5.5271	3.11752	6.09312	4.21776	1.40468	1.43238	0.87698	2.09937	1.77292	1.44463	-0.517601	0.110668	1	-	-	-	+	+	+	Intron (XM_001122688.5/726972, intron 1 of 4)	12120915	12123998	3084	+	107965622	XR_001705753.2
NC_037653.1	3445783	3446107	3445926;3445955;3445965	106	82	107	61	90	50	97	37	101	47	114	84	5.02044	4.50109	5.04792	3.3449	4.49722	2.69637	4.44724	2.05352	5.93436	2.67216	5.3084	3.5496	1.11538	1.50914	1.66788	2.16567	2.22081	1.49549	-0.454514	0.144766	1	-	-	-	+	+	+	Promoter (2-3kb)	3447336	3449093	1758	-	107965725	XR_003306278.1
NC_037650.1	4869573	4870551	4869777;4869776;4869748;4870077;4870411	179	226	160	160	204	118	196	118	125	150	271	173	8.4456	12.3102	7.52514	8.68595	10.1311	6.29153	8.93986	6.43076	7.33068	8.40617	12.5555	7.26624	0.686065	0.866358	1.61028	1.39017	0.872059	1.72792	-0.335288	0.505323	1	-	-	-	+	+	+	Exon (XM_006560420.2/413549, exon 4 of 7)	4865197	4866061	865	-	113218576	XM_026444740.1
NC_037641.1	6354535	6354844	6354687;6354668;6354686	103	81	112	69	84	86	158	50	126	65	122	68	4.87968	4.44686	5.28162	3.7765	4.2007	4.59969	7.21542	2.75604	7.38886	3.67422	5.67768	2.88144	1.09733	1.39855	0.913257	2.61804	2.011	1.97043	-0.952944	0.0178604	1	-	-	-	+	+	+	Intron (XM_026440483.1/100576383, intron 2 of 8)	6319326	6319540	215	-	113218754	XR_003304634.1
NC_037643.1	3689770	3690647	3689867;3690359;3690027;3690227;3690380	142	184	146	151	172	131	340	139	191	101	257	146	6.70956	10.0326	6.87078	8.2004	8.54966	6.97884	15.4746	7.5656	11.1706	5.67834	11.9093	6.13872	0.668776	0.837859	1.22508	2.04539	1.96723	1.94003	-1.12372	0.0196659	1	-	-	-	+	+	+	Promoter (2-3kb)	3687707	3690878	3172	+	113218846	XR_003304863.1
NC_037645.1	7641620	7642194	7641778;7641759;7642072	171	89	90	73	152	61	178	76	120	71	143	96	8.07024	4.8807	4.25334	3.9923	7.56126	3.27794	8.12302	4.16108	7.03978	4.00824	6.64704	4.05072	1.6535	1.06539	2.30671	1.95214	1.75633	1.64095	-0.0900879	0.795079	1	-	-	-	+	+	+	Promoter (<=1kb)	7637705	7642247	4543	-	113218927	XR_003305118.1
NC_037638.1	8633847	8634455	8634018;8634096;8634094	125	127	156	102	159	105	140	84	122	73	195	113	5.91192	6.94144	7.33818	5.55685	7.9072	5.60422	6.39858	4.5934	7.15614	4.11958	9.04736	4.76064	0.851685	1.32056	1.41094	1.39299	1.7371	1.90045	-0.489473	0.104275	1	-	-	-	+	+	+	Intron (XM_026443702.1/410732, intron 3 of 5)	8645147	8650832	5686	+	113219089	XR_003305621.1
NC_037648.1	1625735	1626197	1625973;1626001;1626026	131	103	119	71	92	156	186	76	120	71	120	77	6.19344	5.63992	5.6088	3.8844	4.59606	8.30059	8.48606	4.16108	7.03978	4.00824	5.58536	3.25728	1.09814	1.44393	0.553703	2.03939	1.75633	1.71473	-0.831868	0.0745931	1	-	-	-	+	+	+	Intron (XM_006558933.3/410299, intron 6 of 13)	1563316	1569909	6594	+	113219132	XR_003305787.1
NC_037649.1	6577347	6578280	6577495;6578083;6577599;6578253	226	176	233	149	202	359	241	113	259	82	160	139	10.6508	9.59871	10.9372	8.0925	10.0323	19.0332	10.982	6.16056	15.1268	4.62061	7.43176	5.8464	1.10961	1.35152	0.527095	1.78263	3.27377	1.27117	-1.08236	0.196741	1	-	-	-	+	+	+	Intron (XM_016915531.2/410362, intron 4 of 8)	6553996	6555138	1143	+	113219145	XR_003305815.1
NC_037650.1	9697583	9697991	9697714;9697768;9697801	135	86	104	50	124	62	134	68	88	61	114	58	6.38112	4.71801	4.9077	2.75145	6.1775	3.33081	6.1263	3.72876	5.17802	3.45154	5.3084	2.46384	1.3525	1.78368	1.85465	1.64299	1.50021	2.15452	-0.0860892	0.707845	1	-	-	-	+	+	+	Distal Intergenic	9680184	9685371	5188	-	113219210	XM_026444797.1
NC_037650.1	8482554	8482951	8482711;8482722;8482835	141	98	117	87	139	107	135	58	115	69	135	86	6.66264	5.36877	5.51532	4.7476	6.9188	5.70996	6.17168	3.18836	6.74888	3.8969	6.27776	3.63312	1.241	1.16171	1.21171	1.93569	1.73186	1.72793	-0.577988	0.00771967	1	-	-	-	+	+	+	Intron (XR_003305984.1/102655449, intron 2 of 5)	8511075	8514461	3387	-	113219212	XR_003305987.1
NC_037638.1	27402843	27403689	27403000;27403403;27403028;27403447;27403081	235	184	166	109	126	232	290	109	206	91	179	149	11.0731	10.0326	7.80558	5.9345	6.27634	12.3187	13.2056	5.9444	12.0433	5.12164	8.3088	6.264	1.10371	1.31529	0.509497	2.22152	2.35145	1.32644	-1.01041	0.0746677	1	-	-	-	+	+	+	Intron (XM_026446306.1/113219412, intron 1 of 4)	27334320	27419146	84827	-	113219412	XM_026446306.1
[truncated: 4 more columns]
