# Supplementary material for: The diverging epigenomic landscapes of honeybee queens and workers revealed by multiomic sequencing
Source: Research Square preprint supplement (doi:10.21203/rs.3.rs-1629662/v1), 2022-05-11
Supplement: Supplementary file 5 [file a628e8aadf566606ac78a2e1.xlsx]

## Sheet: unique peaks for 2Q
Chromosome	PeakStart	PeakEnd	oriSummitPos	Count_2Q1	Count_2Q2	Count_2Q3	Count_2w1	Count_2w2	Count_2w3	RPM_2Q1	RPM_2Q2	RPM_2Q3	RPM_2w1	RPM_2w2	RPM_2w3	FoldEnrich_2Q1	FoldEnrich_2Q2	FoldEnrich_2Q3	FoldEnrich_2w1	FoldEnrich_2w2	FoldEnrich_2w3	log2foldchange	pvalue	qvalue	In_2Q1	In_2Q2	In_2Q3	In_2w1	In_2w2	In_2w3	annotation	geneStart	geneEnd	geneLength	geneStrand	geneId	transcriptId	distanceToTSS	ClosestTSS_GO
NC_037652.1	7731597	7731878	7731718;7731739;7731729	502	535	559	267	292	406	8.24417	8.64568	9.156	4.355	5.11578	5.33984	6.58513	6.90584	7.31346	3.47861	4.08629	4.26526	0.814421	0.000762558	1	+	+	+	-	-	-	Promoter (2-3kb)	7734777	7737849	3073	1	406078	NM_001011572.1	-2899	.
NC_037643.1	15014746	15014959	15014843;15014841;15014843	362	386	443	414	368	523	5.94957	6.24231	7.2594	6.74375	6.44274	6.87488	6.26236	6.57049	7.64106	7.0983	6.78146	7.23632	-0.044555	0.666607	1	+	+	+	-	-	-	Distal Intergenic	15024551	15025504	954	1	406093	NM_001011582.1	-9592	GO:0005525::GTP binding;GO:0006614::SRP-dependent cotranslational protein targeting to membrane
NC_037639.1	12137664	12137972	12137802;12137824;12137847	184	220	207	145	175	203	3.03215	3.56473	3.4008	2.3725	3.07296	2.67648	2.21034	2.59857	2.47907	1.72947	2.24009	1.95107	0.299769	0.0754824	1	+	+	+	-	-	-	Promoter (<=1kb)	12135342	12138625	3284	2	406113	NM_001011597.1	653	GO:0006835::dicarboxylic acid transport;GO:0016020::membrane;GO:0017153::sodium:dicarboxylate symporter activity
NC_037649.1	2036523	2037013	2036574;2036854;2036880;2036842	326	312	341	170	160	247	5.35953	5.04869	5.5917	2.77875	2.81106	3.25376	2.45873	2.31613	2.56525	1.27478	1.2896	1.49269	0.855364	0.000409117	1	+	+	+	-	-	-	Distal Intergenic	2051130	2053395	2266	1	408371	#NAME?	-14117	GO:0003676::nucleic acid binding;GO:0003677::DNA binding;GO:0005524::ATP binding;GO:0016787::hydrolase activity
NC_037650.1	6036388	6036692	6036576;6036562;6036615	314	279	312	295	279	311	5.16285	4.5164	5.11755	4.81	4.8888	4.09344	3.81291	3.33549	3.77945	3.55232	3.61051	3.02312	0.101428	0.36667	1	+	+	+	-	-	-	Intron (XM_016915781.2/408429, intron 4 of 17)	6004509	6040126	35618	2	408429	#NAME?	3434	GO:0003677::DNA binding;GO:0003917::DNA topoisomerase type I activity;GO:0004252::serine-type endopeptidase activity;GO:0005515::protein binding;GO:0005694::chromosome;GO:0005886::plasma membrane;GO:0006265::DNA topological change;GO:0008948::oxaloacetate decarboxylase activity;GO:0015081::sodium ion transmembrane transporter activity;GO:0016020::membrane;GO:0071436::sodium ion export
NC_037650.1	6100077	6100360	6100202;6100225;6100223	370	442	366	306	342	372	6.08069	7.14559	6.00045	4.98875	5.98878	4.89376	4.82282	5.66743	4.75918	3.95676	4.74992	3.88142	0.276694	0.0930208	1	+	+	+	-	-	-	Intron (XM_006560372.3/408429, intron 1 of 20)	6004509	6092471	87963	2	408429	#NAME?	-7606	GO:0003677::DNA binding;GO:0003917::DNA topoisomerase type I activity;GO:0004252::serine-type endopeptidase activity;GO:0005515::protein binding;GO:0005694::chromosome;GO:0005886::plasma membrane;GO:0006265::DNA topological change;GO:0008948::oxaloacetate decarboxylase activity;GO:0015081::sodium ion transmembrane transporter activity;GO:0016020::membrane;GO:0071436::sodium ion export
NC_037651.1	5193224	5193724	5193516;5193325;5193490;5193476	596	425	382	216	162	342	9.78483	6.87138	6.26205	3.52625	2.84598	4.50016	4.39928	3.08939	2.81543	1.58541	1.27956	2.02328	1.07583	0.0490579	1	+	+	+	-	-	-	Intron (XM_016915983.2/408450, intron 2 of 9)	5177026	5201765	24740	2	408450	#NAME?	8041	GO:0005230::extracellular ligand-gated ion channel activity;GO:0006810::transport;GO:0006811::ion transport;GO:0016020::membrane;GO:0016021::integral component of membrane
NC_037651.1	8050278	8050765	8050491;8050626;8050501	763	880	956	340	342	418	12.522	14.2105	15.647	5.54125	5.98878	5.49728	5.7799	6.55928	7.22234	2.55773	2.7643	2.53743	1.31552	0.00956617	1	+	+	+	-	-	-	Promoter (<=1kb)	8051746	8058886	7141	1	408463	#NAME?	-981	GO:0003779::actin binding;GO:0003824::catalytic activity;GO:0005216::ion channel activity;GO:0005242::inward rectifier potassium channel activity;GO:0006811::ion transport;GO:0006813::potassium ion transport;GO:0007010::cytoskeleton organization;GO:0016020::membrane;GO:0016021::integral component of membrane;GO:0051536::iron-sulfur cluster binding;GO:0055085::transmembrane transport
NC_037651.1	10642695	10643340	10642840;10642861;10642916;10643217;10643223;10643195	397	721	516	309	315	501	6.52322	11.6459	8.45295	5.0375	5.51736	6.58624	2.27455	4.06076	2.94742	1.7565	1.92382	2.29653	0.635163	0.160035	1	+	+	+	-	-	-	Promoter (1-2kb)	10640838	10645204	4367	1	408501	#NAME?	1857	GO:0004540::ribonuclease activity;GO:0004672::protein kinase activity;GO:0005515::protein binding;GO:0005524::ATP binding;GO:0006397::mRNA processing;GO:0006468::protein phosphorylation;GO:0016020::membrane;GO:0016773::phosphotransferase activity, alcohol group as acceptor
NC_037638.1	8525020	8525296	8525137;8525171;8525168	205	214	173	201	160	173	3.37634	3.46795	2.8449	3.2825	2.81106	2.28288	2.74557	2.82007	2.31342	2.66926	2.2859	1.85639	0.210039	0.285873	1	+	+	+	-	-	-	Exon (XM_026444045.1/408602, exon 9 of 15)	8533202	8534672	1471	1	408601	#NAME?	-7906	GO:0006801::superoxide metabolic process;GO:0046872::metal ion binding;GO:0055114::oxidation-reduction process
NC_037639.1	10355301	10355964	10355360;10355612;10355396;10355607;10355886	436	683	655	663	476	859	7.16243	11.0329	10.7256	10.79	8.32842	11.2832	2.42973	3.74273	3.63848	3.66033	2.82528	3.82764	-0.0720343	0.766283	1	+	+	+	-	-	-	Promoter (2-3kb)	10353069	10377206	24138	1	408697	#NAME?	2232	GO:0005515::protein binding;GO:0019901::protein kinase binding
NC_037640.1	12675658	12675965	12675834;12675828;12675837	405	401	357	272	331	391	6.65434	6.48426	5.8533	4.43625	5.79672	5.14304	4.86655	4.74216	4.28072	3.24438	4.23934	3.76128	0.304703	0.0715285	1	+	+	+	-	-	-	Promoter (1-2kb)	12661564	12673910	12347	2	408729	#NAME?	-1748	GO:0004930::G-protein coupled receptor activity;GO:0007186::G-protein coupled receptor signaling pathway;GO:0016021::integral component of membrane
NC_037640.1	11691680	11692196	11691755;11691891;11691853;11692083;11692085	512	749	598	312	321	411	8.40807	12.0975	9.79365	5.08625	5.62212	5.40544	3.6633	5.27074	4.26698	2.21602	2.44949	2.35509	0.910983	0.0455124	1	+	+	+	-	-	-	Promoter (<=1kb)	11690985	11698726	7742	1	408734	#NAME?	695	GO:0008033::tRNA processing;GO:0016491::oxidoreductase activity;GO:0050660::flavin adenine dinucleotide binding;GO:0055114::oxidation-reduction process;GO:0071949::FAD binding
NC_037640.1	3066112	3066522	3066268;3066257;3066283	564	322	287	113	146	175	9.26035	5.20999	4.7088	1.8525	2.56662	2.30912	5.07519	2.85536	2.58068	1.01527	1.40665	1.26553	1.51124	0.0994345	1	+	+	+	-	-	-	Intron (XM_016911332.2/408759, intron 2 of 9)	3073963	3115462	41500	1	408759	#NAME?	-7441	GO:0016533::cyclin-dependent protein kinase 5 holoenzyme complex;GO:0016534::cyclin-dependent protein kinase 5 activator activity
NC_037640.1	2544735	2545149	2544813;2545055;2545072;2545047	227	234	242	217	227	264	3.73692	3.79055	3.97305	3.5425	3.98088	3.4768	2.0283	2.05741	2.15647	1.92277	2.16072	1.88711	0.064172	0.412546	1	+	+	+	-	-	-	3' UTR	2546251	2602840	56590	2	408763	#NAME?	57691	GO:0003677::DNA binding;GO:0003700::sequence-specific DNA binding transcription factor activity;GO:0004252::serine-type endopeptidase activity;GO:0005634::nucleus;GO:0005886::plasma membrane;GO:0006355::regulation of transcription, DNA-templated;GO:0007165::signal transduction;GO:0016237::microautophagy;GO:0016579::protein deubiquitination;GO:0034448::EGO complex;GO:0036459::ubiquitinyl hydrolase…
NC_037641.1	12351719	12352208	12351842;12351859;12351857	996	878	965	555	580	727	16.3408	14.1783	15.7941	9.035	10.1443	9.55136	7.5118	6.5177	7.26048	4.15335	4.66329	4.39072	0.688832	0.00434516	1	+	+	+	-	-	-	Exon (XM_016911889.2/408777, exon 8 of 14)	12345484	12359114	13631	1	408777	#NAME?	6235	GO:0005216::ion channel activity;GO:0005515::protein binding;GO:0006811::ion transport;GO:0016020::membrane;GO:0016021::integral component of membrane;GO:0042919::benzoate transport;GO:0042925::benzoate transporter activity;GO:0055085::transmembrane transport
NC_037641.1	9811818	9812281	9811967;9811970;9811983	255	302	220	225	161	251	4.19584	4.88739	3.61335	3.6725	2.82852	3.30624	2.03689	2.37261	1.75412	1.78283	1.37312	1.60503	0.372518	0.105091	1	+	+	+	-	-	-	5' UTR	9613735	9840315	226581	2	408801	#NAME?	28034	.
NC_037642.1	4545653	4545897	4545766;4545776;4545783	246	240	265	193	187	130	4.04833	3.88733	4.3491	3.1525	3.28248	1.71872	3.722	3.57398	3.99852	2.89838	3.01788	1.58018	0.591343	0.102045	1	+	+	+	-	-	-	Intron (XM_016912263.2/408824, intron 2 of 16)	4292654	4618886	326233	2	408824	#NAME?	72989	GO:0003993::acid phosphatase activity;GO:0005515::protein binding;GO:0005634::nucleus;GO:0006479::protein methylation;GO:0008168::methyltransferase activity;GO:0016798::hydrolase activity, acting on glycosyl bonds;GO:0046872::metal ion binding;GO:0051726::regulation of cell cycle
NC_037642.1	11345034	11345665	11345170;11345170;11345145;11345508	360	443	453	320	305	420	5.91679	7.16172	7.4229	5.21625	5.34276	5.52352	2.1088	2.55251	2.64559	1.85912	1.90421	1.96864	0.350229	0.081831	1	+	+	+	-	-	-	Promoter (2-3kb)	11341701	11347826	6126	2	408850	#NAME?	2161	GO:0005515::protein binding;GO:0005622::intracellular;GO:0005634::nucleus;GO:0006396::RNA processing;GO:0006397::mRNA processing
NC_037644.1	13992470	13992730	13992625;13992618;13992628	307	241	274	273	262	357	5.04812	3.90346	4.49625	4.4525	4.59198	4.69696	4.35668	3.3688	3.8804	3.84264	3.96302	4.05362	-0.0311598	0.79737	1	+	+	+	-	-	-	Intron (XM_026441643.1/408898, intron 3 of 8)	13978675	14003680	25006	1	408898	#NAME?	13795	GO:0001558::regulation of cell growth;GO:0003700::sequence-specific DNA binding transcription factor activity;GO:0005739::mitochondrion;GO:0008083::growth factor activity;GO:0016020::membrane;GO:0055085::transmembrane transport;GO:0097351::toxin-antitoxin pair type II binding
NC_037644.1	12702261	12702932	12702368;12702548;12702851;12702335;12702603;12702830;12702586;12702816	617	555	668	188	234	232	10.129	8.96828	10.9382	3.07125	4.1031	3.05696	3.39519	3.00612	3.66643	1.02947	1.37534	1.02468	1.55368	0.0014718	1	+	+	+	-	-	-	Intron (XM_016913010.2/408915, intron 1 of 8)	12538654	12708493	169840	2	408915	#NAME?	5561	GO:0000103::sulfate assimilation;GO:0003333::amino acid transmembrane transport;GO:0003676::nucleic acid binding;GO:0003779::actin binding;GO:0004020::adenylylsulfate kinase activity;GO:0004190::aspartic-type endopeptidase activity;GO:0004482::mRNA (guanine-N7-)-methyltransferase activity;GO:0005524::ATP binding;GO:0006370::7-methylguanosine mRNA capping;GO:0007010::cytoskeleton organization;GO:0…
NC_037644.1	12701799	12702097	12701950;12701942;12701969	406	394	422	145	163	149	6.67073	6.37135	6.91605	2.3725	2.86344	1.968	5.02538	4.79984	5.21019	1.78732	2.15717	1.48259	1.47012	0.000467084	1	+	+	+	-	-	-	Intron (XM_016913010.2/408915, intron 1 of 8)	12538654	12708493	169840	2	408915	#NAME?	6396	GO:0000103::sulfate assimilation;GO:0003333::amino acid transmembrane transport;GO:0003676::nucleic acid binding;GO:0003779::actin binding;GO:0004020::adenylylsulfate kinase activity;GO:0004190::aspartic-type endopeptidase activity;GO:0004482::mRNA (guanine-N7-)-methyltransferase activity;GO:0005524::ATP binding;GO:0006370::7-methylguanosine mRNA capping;GO:0007010::cytoskeleton organization;GO:0…
NC_037644.1	2688980	2689199	2689125;2689146;2689147	194	191	188	128	117	136	3.19605	3.09696	3.09015	2.09625	2.06028	1.79744	3.27233	3.17088	3.1639	2.14628	2.10945	1.84034	0.656222	0.00311401	1	+	+	+	-	-	-	Intron (XM_026441946.1/408944, intron 1 of 17)	2679151	2933459	254309	1	408944	#NAME?	9829	GO:0003677::DNA binding;GO:0003779::actin binding;GO:0007010::cytoskeleton organization
NC_037645.1	8266349	8266704	8266482;8266521;8266598	208	217	213	157	152	191	3.42551	3.51634	3.4989	2.5675	2.67138	2.51904	2.16741	2.22488	2.21385	1.62453	1.69025	1.59387	0.428484	0.000237208	1	+	+	+	-	-	-	Exon (XM_026442522.1/100577280, exon 9 of 13)	8274418	8277937	3520	1	408969	#NAME?	-7714	GO:0004806::triglyceride lipase activity;GO:0006886::intracellular protein transport;GO:0008152::metabolic process;GO:0009405::pathogenesis;GO:0016042::lipid catabolic process;GO:0016192::vesicle-mediated transport;GO:0016787::hydrolase activity;GO:0019835::cytolysis;GO:0019867::outer membrane;GO:0030131::clathrin adaptor complex
NC_037646.1	8703158	8703436	8703299;8703290;8703313	482	417	401	440	338	568	7.91637	6.74234	6.5727	7.16625	5.91894	7.46528	6.39129	5.44343	5.30647	5.78568	4.77866	6.0271	0.0470288	0.738884	1	+	+	+	-	-	-	Promoter (<=1kb)	8703265	8765777	62513	1	409007	#NAME?	0	GO:0000398::mRNA splicing, via spliceosome;GO:0000808::origin recognition complex;GO:0003677::DNA binding;GO:0003700::sequence-specific DNA binding transcription factor activity;GO:0003723::RNA binding;GO:0003779::actin binding;GO:0003917::DNA topoisomerase type I activity;GO:0004252::serine-type endopeptidase activity;GO:0005215::transporter activity;GO:0005634::nucleus;GO:0005694::chromosome;GO…
NC_037645.1	6489632	6490555	6489754;6489784;6490077;6490310;6490418;6490286;6490225	588	614	510	391	342	480	9.65371	9.91995	8.35485	6.37	5.98878	6.31072	2.35336	2.41827	2.03673	1.55287	1.45993	1.53841	0.581055	0.018892	1	+	+	+	-	-	-	3' UTR	6485807	6492863	7057	1	409065	#NAME?	3825	GO:0003676::nucleic acid binding
NC_037638.1	14737034	14737773	14737124;14737516;14737554;14737447	419	378	408	255	273	341	6.8838	6.11327	6.68715	4.16	4.78404	4.48704	2.09538	1.86084	2.03552	1.26628	1.45623	1.36582	0.551464	0.002563	1	+	+	+	-	-	-	Promoter (<=1kb)	14735242	14738355	3114	2	409075	#NAME?	582	GO:0003779::actin binding;GO:0007010::cytoskeleton organization;GO:0070836::caveola assembly
NC_037645.1	2243572	2244124	2243703;2244021;2243683;2243734;2244031	447	660	553	297	366	476	7.34272	10.6619	9.0579	4.8425	6.40782	6.25824	2.99088	4.34286	3.68951	1.97247	2.61007	2.54914	0.628236	0.059902	1	+	+	+	-	-	-	Promoter (1-2kb)	2241772	2244128	2357	1	409148	NM_001242657.1	1800	GO:0015078::hydrogen ion transmembrane transporter activity;GO:0015991::ATP hydrolysis coupled proton transport;GO:0033177::proton-transporting two-sector ATPase complex, proton-transporting domain
NC_037648.1	10474887	10475184	10475032;10475030;10475015	245	364	205	129	125	232	4.03194	5.88745	3.3681	2.1125	2.19996	3.05696	3.04764	4.45018	2.54586	1.59679	1.6629	2.31068	0.850446	0.10565	1	+	+	+	-	-	-	Promoter (<=1kb)	10475708	10481235	5528	1	409203	#NAME?	-524	GO:0003684::damaged DNA binding;GO:0006289::nucleotide-excision repair;GO:0008152::metabolic process;GO:0008534::oxidized purine nucleobase lesion DNA N-glycosylase activity;GO:0016758::transferase activity, transferring hexosyl groups
NC_037642.1	13306063	13306284	13306171;13306171;13306175	290	328	334	213	273	350	4.76949	5.30677	5.47725	3.4775	4.78404	4.60512	4.83933	5.38448	5.55746	3.52842	4.8541	4.67256	0.273603	0.147063	1	+	+	+	-	-	-	Intron (XM_006570187.2/409207, intron 1 of 6)	13303009	13325210	22202	1	409207	#NAME?	3054	GO:0008033::tRNA processing;GO:0016021::integral component of membrane;GO:0016620::oxidoreductase activity, acting on the aldehyde or oxo group of donors, NAD or NADP as acceptor;GO:0051287::NAD binding;GO:0055114::oxidation-reduction process
NC_037638.1	15165547	15165840	15165681;15165694;15165729	196	195	181	137	157	223	3.22883	3.16148	2.9757	2.2425	2.75868	2.93888	2.4738	2.4222	2.27986	1.71811	2.11359	2.25165	0.238285	0.138848	1	+	+	+	-	-	-	Promoter (<=1kb)	15161329	15166489	5161	2	409261	#NAME?	649	GO:0005975::carbohydrate metabolic process;GO:0016773::phosphotransferase activity, alcohol group as acceptor
NC_037639.1	13365580	13365962	13365728;13365908;13365845	214	215	237	183	145	187	3.52385	3.48408	3.8913	2.99	2.54916	2.46656	2.07246	2.04907	2.28856	1.75849	1.49922	1.45064	0.445123	0.0109101	1	+	+	+	-	-	-	Exon (XM_026446400.1/409322, exon 9 of 17)	13360722	13371029	10308	2	409322	#NAME?	5067	.
NC_037648.1	7134026	7134388	7134224;7134258;7134273	292	238	219	144	144	164	4.80227	3.85507	3.597	2.35625	2.5317	2.1648	2.97993	2.39217	2.23203	1.46211	1.57099	1.34331	0.797035	0.0335786	1	+	+	+	-	-	-	Exon (XM_006562392.3/409470, exon 10 of 11)	7132403	7146040	13638	2	409470	#NAME?	11652	GO:0004252::serine-type endopeptidase activity;GO:0005886::plasma membrane;GO:0008270::zinc ion binding;GO:0008948::oxaloacetate decarboxylase activity;GO:0015081::sodium ion transmembrane transporter activity;GO:0016020::membrane;GO:0035556::intracellular signal transduction;GO:0046872::metal ion binding;GO:0071436::sodium ion export
NC_037647.1	12049343	12050091	12049434;12049449;12049857;12049442;12049867;12049866	442	467	445	276	203	292	7.26077	7.54884	7.2921	4.50125	3.56184	3.84416	2.18357	2.2702	2.19299	1.35369	1.07117	1.15608	0.892318	0.00349425	1	+	+	+	-	-	-	3' UTR	12049151	12056511	7361	2	409486	#NAME?	6420	GO:0003676::nucleic acid binding;GO:0003723::RNA binding;GO:0004535::poly(A)-specific ribonuclease activity;GO:0005634::nucleus;GO:0005737::cytoplasm;GO:0006402::mRNA catabolic process;GO:0046872::metal ion binding
NC_037645.1	1750896	1751203	1751058;1751037;1751066	266	178	190	181	146	203	4.37613	2.88727	3.12285	2.9575	2.56662	2.67648	3.20041	2.11156	2.28385	2.16292	1.87706	1.9574	0.340873	0.252179	1	+	+	+	-	-	-	Promoter (<=1kb)	1747805	1751237	3433	2	409493	#NAME?	34	GO:0046872::metal ion binding
NC_037644.1	10738459	10738912	10738597;10738785;10738674	228	379	284	192	183	208	3.75331	6.1294	4.65975	3.13625	3.21264	2.74208	1.86219	3.04109	2.31192	1.55604	1.59394	1.36048	0.677765	0.113978	1	+	+	+	-	-	-	Exon (XM_016913022.2/409619, exon 22 of 32)	10732918	10751840	18923	2	409619	#NAME?	12928	GO:0008152::metabolic process;GO:0008168::methyltransferase activity;GO:0008237::metallopeptidase activity;GO:0008270::zinc ion binding
NC_037638.1	7107416	7107848	7107729;7107710;7107727	232	225	270	217	128	195	3.81887	3.64538	4.43085	3.5425	2.25234	2.57152	1.98661	1.89636	2.30497	1.84284	1.17169	1.33773	0.507695	0.0735711	1	+	+	+	-	-	-	Intron (XM_016916410.2/409748, intron 1 of 11)	7090810	7115169	24360	2	409748	#NAME?	7321	GO:0005515::protein binding;GO:0008092::cytoskeletal protein binding;GO:0030674::protein binding, bridging;GO:0042802::identical protein binding;GO:0043130::ubiquitin binding
NC_037647.1	6157335	6157741	6157433;6157458;6157527	260	224	212	209	158	278	4.27779	3.62925	3.48255	3.4125	2.77614	3.66048	2.36751	2.00858	1.92739	1.88862	1.53643	2.02586	0.209649	0.226497	1	+	+	+	-	-	-	Distal Intergenic	6223652	6228440	4789	2	410235	#NAME?	70699	GO:0004673::protein histidine kinase activity;GO:0005515::protein binding;GO:0007165::signal transduction
NC_037648.1	7714847	7715181	7714985;7714993;7714982	273	196	188	131	154	177	4.49086	3.17761	3.09015	2.145	2.7063	2.33536	3.01961	2.1366	2.07779	1.44228	1.81969	1.57027	0.5821	0.106228	1	+	+	+	-	-	-	Intron (XM_026443960.1/410304, intron 1 of 9)	7355643	7703606	347964	2	410304	#NAME?	-11241	GO:0003677::DNA binding;GO:0005634::nucleus;GO:0006355::regulation of transcription, DNA-templated;GO:0009289::pilus;GO:0015886::heme transport;GO:0016021::integral component of membrane;GO:0017004::cytochrome complex assembly;GO:0046872::metal ion binding
NC_037650.1	5645409	5645750	5645581;5645579;5645577	436	378	380	285	265	380	7.16243	6.11327	6.22935	4.6475	4.64436	4.99872	4.71738	4.02637	4.10283	3.06098	3.05891	3.2923	0.448783	0.024315	1	+	+	+	-	-	-	Promoter (<=1kb)	5646492	5649140	2649	1	410446	#NAME?	-742	GO:0005515::protein binding
NC_037650.1	6335713	6336183	6335878;6335859;6335900	337	210	273	237	184	225	5.53982	3.40343	4.4799	3.8675	3.2301	2.96512	2.64936	1.62766	2.14247	1.84959	1.54476	1.41804	0.415703	0.203277	1	+	+	+	-	-	-	Promoter (1-2kb)	6326339	6334638	8300	2	410456	#NAME?	-1075	GO:0007165::signal transduction;GO:0016020::membrane;GO:0016788::hydrolase activity, acting on ester bonds
NC_037651.1	3994960	3995266	3995057;3995065;3995097	291	224	206	153	150	215	4.78588	3.62925	3.38445	2.5025	2.63646	2.83392	3.51148	2.66284	2.48323	1.83612	1.93441	2.07929	0.565563	0.0917449	1	+	+	+	-	-	-	Intron (XM_006560177.3/410480, intron 2 of 13)	3948496	4123712	175217	1	410480	#NAME?	46464	GO:0005515::protein binding;GO:0007009::plasma membrane organization;GO:0009523::photosystem II;GO:0015979::photosynthesis;GO:0016020::membrane;GO:0030430::host cell cytoplasm
NC_037651.1	7822479	7822762	7822629;7822649;7822660	203	241	213	164	144	214	3.34356	3.90346	3.4989	2.68125	2.5317	2.8208	2.6519	3.09598	2.77511	2.1266	2.00798	2.23728	0.419644	0.0175492	1	+	+	+	-	-	-	3' UTR	7830535	7841278	10744	1	410515	#NAME?	-7773	GO:0005576::extracellular region;GO:0008083::growth factor activity;GO:0008283::cell proliferation
NC_037651.1	9308348	9308978	9308465;9308680;9308711;9308889	389	387	298	226	216	309	6.3921	6.25844	4.88865	3.68875	3.78882	4.0672	2.28182	2.2341	1.74512	1.31679	1.35251	1.45189	0.603343	0.0467856	1	+	+	+	-	-	-	3' UTR	9308534	9316355	7822	2	410545	#NAME?	7377	GO:0000002::mitochondrial genome maintenance;GO:0005515::protein binding;GO:0005634::nucleus;GO:0005789::endoplasmic reticulum membrane;GO:0006886::intracellular protein transport;GO:0016192::vesicle-mediated transport;GO:0030117::membrane coat
NC_037653.1	7039509	7039817	7039619;7039640;7039762	188	216	186	137	96	159	3.09771	3.50021	3.05745	2.2425	1.69362	2.0992	2.25813	2.55154	2.22878	1.63471	1.23459	1.53025	0.677901	0.00544687	1	+	+	+	-	-	-	Intron (XM_026445883.1/410637, intron 18 of 18)	7037430	7058969	21540	2	410637	#NAME?	19152	GO:0005515::protein binding;GO:0005739::mitochondrion;GO:0006355::regulation of transcription, DNA-templated;GO:0016021::integral component of membrane;GO:0034597::phosphatidylinositol-4,5-bisphosphate 4-phosphatase activity;GO:0046856::phosphatidylinositol dephosphorylation;GO:0046983::protein dimerization activity
NC_037653.1	7115539	7115835	7115697;7115714;7115718	230	533	353	83	171	122	3.78609	8.61342	5.7879	1.365	3.00312	1.61376	2.87145	6.53259	4.38966	1.03524	2.27763	1.22391	1.60427	0.0871323	1	+	+	+	-	-	-	Intron (XM_016917003.2/410637, intron 2 of 21)	7037430	7129754	92325	2	410637	#NAME?	13919	GO:0005515::protein binding;GO:0005739::mitochondrion;GO:0006355::regulation of transcription, DNA-templated;GO:0016021::integral component of membrane;GO:0034597::phosphatidylinositol-4,5-bisphosphate 4-phosphatase activity;GO:0046856::phosphatidylinositol dephosphorylation;GO:0046983::protein dimerization activity
NC_037653.1	6761485	6762064	6761583;6761596;6761609;6761863;6761912	233	388	319	137	172	111	3.83526	6.27457	5.232	2.2425	3.02058	1.46944	1.48948	2.43681	2.03192	0.870905	1.17308	0.570677	1.18825	0.0344919	1	+	+	+	-	-	-	Promoter (<=1kb)	6754819	6762855	8037	2	410638	#NAME?	791	GO:0006520::cellular amino acid metabolic process;GO:0016829::lyase activity;GO:0016831::carboxy-lyase activity;GO:0019752::carboxylic acid metabolic process;GO:0030170::pyridoxal phosphate binding
NC_037638.1	19440542	19441622	19440663;19440880;19441241;19440699;19440858;19441502	485	575	435	373	366	442	7.96554	9.29088	7.1286	6.0775	6.40782	5.81216	1.6598	1.93597	1.48541	1.26639	1.33521	1.2111	0.41435	0.0751721	1	+	+	+	-	-	-	3' UTR	19436838	19443893	7056	1	410688	#NAME?	3704	GO:0003676::nucleic acid binding;GO:0008270::zinc ion binding;GO:0015099::nickel cation transmembrane transporter activity;GO:0016021::integral component of membrane;GO:0035444::nickel cation transmembrane transport;GO:0046872::metal ion binding
NC_037638.1	2794138	2794464	2794237;2794270;2794345	184	196	208	168	126	200	3.03215	3.17761	3.41715	2.74625	2.21742	2.63712	2.08867	2.18887	2.35387	1.89173	1.52745	1.81656	0.340923	0.0315039	1	+	+	+	-	-	-	Intron (XM_026439028.1/410758, intron 3 of 6)	2889433	3119466	230034	1	410758	#NAME?	-94969	GO:0003743::translation initiation factor activity;GO:0003899::DNA-directed RNA polymerase activity;GO:0004190::aspartic-type endopeptidase activity;GO:0005219::ryanodine-sensitive calcium-release channel activity;GO:0005634::nucleus;GO:0005737::cytoplasm;GO:0005739::mitochondrion;GO:0005789::endoplasmic reticulum membrane;GO:0005852::eukaryotic translation initiation factor 3 complex;GO:0006270:…
NC_037638.1	24815554	24816099	24815695;24815997;24815696;24816009;24815717;24816009	255	345	313	249	130	189	4.19584	5.58098	5.1339	4.0625	2.28726	2.4928	1.73098	2.30242	2.11798	1.67597	0.943603	1.0284	0.753814	0.0484296	1	+	+	+	-	-	-	Intron (XM_026446254.1/410780, intron 2 of 5)	24729432	24824586	95155	2	410780	#NAME?	8487	GO:0006812::cation transport;GO:0015299::solute:proton antiporter activity;GO:0016021::integral component of membrane;GO:0055085::transmembrane transport
NC_037641.1	12605817	12606466	12605872;12606124;12606149;12606175	472	543	495	412	326	549	7.75247	8.77472	8.1096	6.71125	5.70942	7.216	2.68654	3.04079	2.8103	2.32572	1.97854	2.50063	0.327264	0.0424481	1	+	+	+	-	-	-	Promoter (1-2kb)	12603942	12608485	4544	1	410987	#NAME?	1875	GO:0003677::DNA binding;GO:0004190::aspartic-type endopeptidase activity;GO:0005975::carbohydrate metabolic process;GO:0006355::regulation of transcription, DNA-templated;GO:0016021::integral component of membrane;GO:0030248::cellulose binding
NC_037642.1	13661880	13662224	13662013;13662021;13662049	566	615	446	466	423	740	9.29313	9.93608	7.30845	7.58875	7.40304	9.72192	6.06749	6.48728	4.7717	4.9547	4.83345	6.34745	0.10273	0.605478	1	+	+	+	-	-	-	Promoter (2-3kb)	13661687	13664505	2819	2	411057	NM_001040257.1	2281	GO:0003779::actin binding;GO:0004252::serine-type endopeptidase activity;GO:0005506::iron ion binding;GO:0007010::cytoskeleton organization;GO:0016032::viral process;GO:0016705::oxidoreductase activity, acting on paired donors, with incorporation or reduction of molecular oxygen;GO:0019082::viral protein processing;GO:0020037::heme binding;GO:0055114::oxidation-reduction process
NC_037642.1	5424870	5425246	5425086;5425097;5425124	430	379	408	272	238	286	7.06409	6.1294	6.68715	4.43625	4.17294	3.76544	4.22067	3.66221	3.99545	2.65058	2.49326	2.24978	0.683979	0.00248013	1	+	+	+	-	-	-	Promoter (<=1kb)	5425795	5437784	11990	1	411065	#NAME?	-549	GO:0016021::integral component of membrane;GO:0055085::transmembrane transport
NC_037641.1	10599028	10599527	10599191;10599389;10599195;10599390;10599372	2554	3216	2617	1175	1380	1899	41.8764	51.8902	42.8043	19.11	24.1123	24.928	18.8654	23.3766	19.2834	8.60909	10.8626	11.2301	1.00286	0.00713922	1	+	+	+	-	-	-	3' UTR	10599268	10604226	4959	2	411207	#NAME?	4699	GO:0003700::sequence-specific DNA binding transcription factor activity;GO:0004190::aspartic-type endopeptidase activity;GO:0005739::mitochondrion;GO:0006355::regulation of transcription, DNA-templated;GO:0007224::smoothened signaling pathway;GO:0016021::integral component of membrane;GO:0019079::viral genome replication;GO:0030337::DNA polymerase processivity factor activity;GO:0031224::intrinsi…
NC_037644.1	8765226	8765530	8765314;8765355;8765391	169	178	182	137	148	159	2.7863	2.88727	2.99205	2.2425	2.60154	2.0992	2.05776	2.13233	2.20971	1.65615	1.92131	1.55032	0.319694	0.0466589	1	+	+	+	-	-	-	Promoter (2-3kb)	8763107	8768116	5010	1	411223	#NAME?	2119	GO:0005179::hormone activity;GO:0005576::extracellular region;GO:0006508::proteolysis;GO:0008152::metabolic process;GO:0008236::serine-type peptidase activity;GO:0016787::hydrolase activity
NC_037645.1	5106246	5107187	5106599;5106978;5106615;5106987;5106582;5107007	605	736	567	217	359	279	9.93234	11.8878	9.2868	3.5425	6.2856	3.6736	2.37502	2.84261	2.22066	0.847082	1.50301	0.878431	1.2041	0.00815652	1	+	+	+	-	-	-	Exon (XM_026442498.1/100577408, exon 3 of 7)	5108830	5114176	5347	2	411252	#NAME?	6989	GO:0005524::ATP binding;GO:0005525::GTP binding;GO:0016887::ATPase activity
NC_037646.1	10956090	10956378	10956162;10956352;10956344	187	221	220	113	125	167	3.08132	3.58086	3.61335	1.8525	2.19996	2.20416	2.40163	2.79098	2.8163	1.44387	1.71468	1.71795	0.715757	0.0046055	1	+	+	+	-	-	-	Intron (XM_026442824.1/411306, intron 7 of 11)	10952846	10960967	8122	2	411306	#NAME?	4589	GO:0008121::ubiquinol-cytochrome-c reductase activity;GO:0008440::inositol-1,4,5-trisphosphate 3-kinase activity;GO:0055114::oxidation-reduction process
NC_037646.1	8802980	8803296	8803119;8803102;8803104	255	207	220	167	146	159	4.19584	3.35504	3.61335	2.73	2.56662	2.0992	2.98144	2.38399	2.56754	1.93986	1.82376	1.49163	0.594102	0.0181584	1	+	+	+	-	-	-	3' UTR	8766576	8797600	31025	2	411323	#NAME?	-5380	GO:0004930::G-protein coupled receptor activity;GO:0007186::G-protein coupled receptor signaling pathway;GO:0016021::integral component of membrane
NC_037646.1	8472046	8472467	8472144;8472342;8472325;8472335	823	498	627	316	335	344	13.5054	8.04887	10.2678	5.15125	5.86656	4.5264	7.20878	4.29624	5.48064	2.74958	3.13139	2.41606	1.03365	0.0682562	1	+	+	+	-	-	-	Promoter (1-2kb)	8460197	8473671	13475	2	411330	#NAME?	1204	GO:0001104::RNA polymerase II transcription cofactor activity;GO:0005509::calcium ion binding;GO:0006357::regulation of transcription from RNA polymerase II promoter;GO:0016021::integral component of membrane;GO:0016592::mediator complex;GO:0050909::sensory perception of taste
NC_037640.1	1705087	1705377	1705247;1705247;1705246	261	226	210	109	159	125	4.29418	3.66151	3.44985	1.7875	2.7936	1.65312	3.32394	2.83422	2.67038	1.38363	2.16241	1.27961	0.871454	0.0212155	1	+	+	+	-	-	-	Intron (XM_006557254.2/411365, intron 2 of 7)	1667221	1746862	79642	2	411365	#NAME?	41485	GO:0008948::oxaloacetate decarboxylase activity;GO:0015081::sodium ion transmembrane transporter activity;GO:0016020::membrane;GO:0071436::sodium ion export
NC_037648.1	14409860	14410168	14409979;14410029;14410129	190	179	234	141	127	211	3.13049	2.9034	3.84225	2.3075	2.23488	2.78144	2.28202	2.11648	2.80087	1.68209	1.62915	2.02758	0.431351	0.0749105	1	+	+	+	-	-	-	Promoter (<=1kb)	14411044	14414597	3554	1	411457	#NAME?	-876	GO:0005524::ATP binding;GO:0006810::transport;GO:0015018::galactosylgalactosylxylosylprotein 3-beta-glucuronosyltransferase activity;GO:0016020::membrane;GO:0016021::integral component of membrane;GO:0042626::ATPase activity, coupled to transmembrane movement of substances
NC_037648.1	14411623	14412145	14411672;14412101;14412094	282	249	242	221	197	257	4.63837	4.0325	3.97305	3.6075	3.45708	3.38496	1.9977	1.73676	1.71115	1.55371	1.48893	1.45787	0.275004	0.0642298	1	+	+	+	-	-	-	Promoter (<=1kb)	14411051	14414597	3547	1	411457	#NAME?	572	GO:0005524::ATP binding;GO:0006810::transport;GO:0015018::galactosylgalactosylxylosylprotein 3-beta-glucuronosyltransferase activity;GO:0016020::membrane;GO:0016021::integral component of membrane;GO:0042626::ATPase activity, coupled to transmembrane movement of substances
NC_037641.1	348531	348800	348658;348676;348666	230	226	176	59	79	98	3.78609	3.66151	2.89395	0.975	1.3968	1.29888	3.15859	3.05466	2.41431	0.813406	1.1653	1.08361	1.49433	0.00679475	1	+	+	+	-	-	-	Intron (XM_006557331.3/411557, intron 2 of 2)	220941	302754	81814	2	411557	#NAME?	-45777	GO:0005739::mitochondrion;GO:0016787::hydrolase activity
NC_037641.1	297681	298064	297892;297876;297919	817	618	616	212	330	341	13.407	9.98447	10.0879	3.46125	5.77926	4.48704	7.86442	5.8568	5.91747	2.03034	3.39006	2.63206	1.2862	0.0123286	1	+	+	+	-	-	-	Intron (XM_003249045.4/411557, intron 1 of 1)	220941	302754	81814	2	411557	#NAME?	4690	GO:0005739::mitochondrion;GO:0016787::hydrolase activity
NC_037652.1	5142385	5142753	5142579;5142574;5142575	424	289	339	262	193	206	6.96575	4.6777	5.559	4.27375	3.38724	2.71584	4.25214	2.85544	3.39341	2.60885	2.06769	1.65785	0.729248	0.0551374	1	+	+	+	-	-	-	Intron (XM_026445540.1/411569, intron 2 of 16)	5151892	5157501	5610	2	411570	#NAME?	14748	.
NC_037653.1	7165658	7166049	7165889;7165926;7165884	272	273	234	188	166	241	4.47447	4.41962	3.84225	3.07125	2.91582	3.17504	2.57112	2.5396	2.20783	1.7648	1.67549	1.82444	0.475199	0.0178123	1	+	+	+	-	-	-	Promoter (<=1kb)	7166728	7168206	1479	1	411607	#NAME?	-679	GO:0006729::tetrahydrobiopterin biosynthetic process;GO:0008124::4-alpha-hydroxytetrahydrobiopterin dehydratase activity
NC_037640.1	1443152	1443495	1443290;1443277;1443287	238	203	223	176	134	206	3.91721	3.29052	3.6624	2.87625	2.3571	2.71584	2.56499	2.15463	2.39814	1.88337	1.54343	1.77833	0.451489	0.0158464	1	+	+	+	-	-	-	Distal Intergenic	1436014	1440707	4694	1	411859	NM_001162513.1	7138	GO:0001614::purinergic nucleotide receptor activity;GO:0004725::protein tyrosine phosphatase activity;GO:0004931::extracellular ATP-gated cation channel activity;GO:0005887::integral component of plasma membrane;GO:0006470::protein dephosphorylation;GO:0008138::protein tyrosine/serine/threonine phosphatase activity;GO:0033198::response to ATP;GO:0098655::cation transmembrane transport
NC_037652.1	2554522	2554833	2554685;2554632;2554705	206	196	192	110	159	168	3.39273	3.17761	3.15555	1.80375	2.7936	2.21728	2.44941	2.2941	2.27817	1.30223	2.01686	1.60078	0.513195	0.0689849	1	+	+	+	-	-	-	Promoter (1-2kb)	2553507	2556483	2977	1	411901	#NAME?	1015	GO:0005515::protein binding
NC_037642.1	901087	901361	901217;901222;901227	240	216	227	172	145	190	3.94999	3.50021	3.7278	2.81125	2.54916	2.50592	3.23541	2.867	3.05342	2.30268	2.088	2.05258	0.506899	0.00322791	1	+	+	+	-	-	-	Promoter (<=1kb)	901241	995407	94167	1	411919	#NAME?	0	GO:0005102::receptor binding;GO:0005576::extracellular region;GO:0007275::multicellular organismal development;GO:0016055::Wnt signaling pathway
NC_037645.1	1472579	1473049	1472883;1472862;1472860	260	307	294	192	195	294	4.27779	4.96804	4.82325	3.13625	3.42216	3.8704	2.04581	2.37591	2.30667	1.49988	1.63661	1.85098	0.431953	0.0154966	1	+	+	+	-	-	-	Exon (XM_026442186.1/411961, exon 11 of 43)	1459055	1478804	19750	2	411961	#NAME?	5755	GO:0003677::DNA binding;GO:0004842::ubiquitin-protein transferase activity;GO:0004882::androgen receptor activity;GO:0005496::steroid binding;GO:0005576::extracellular region;GO:0005634::nucleus;GO:0006355::regulation of transcription, DNA-templated;GO:0006952::defense response;GO:0016020::membrane;GO:0030001::metal ion transport;GO:0030521::androgen receptor signaling pathway;GO:0046873::metal i…
NC_037643.1	7171587	7171867	7171695;7171712;7171720	438	561	442	327	330	442	7.19521	9.06506	7.24305	5.33	5.77926	5.81216	5.76771	7.26659	5.80606	4.27255	4.63268	4.65905	0.474014	0.0626872	1	+	+	+	-	-	-	3' UTR	7168338	7173391	5054	1	411969	#NAME?	3249	GO:0003676::nucleic acid binding;GO:0003723::RNA binding
NC_037644.1	4337146	4337682	4337496;4337446;4337479	368	283	301	199	218	235	6.04791	4.58092	4.9377	3.25	3.82374	3.09632	2.53687	1.92152	2.07118	1.36325	1.60391	1.29879	0.614119	0.0368313	1	+	+	+	-	-	-	Exon (XR_003305069.1/411986, exon 19 of 24)	4332357	4372991	40635	2	411986	#NAME?	35309	GO:0003682::chromatin binding;GO:0009523::photosystem II;GO:0015979::photosynthesis;GO:0016020::membrane;GO:0042301::phosphate ion binding;GO:0050821::protein stabilization
NC_037644.1	4595727	4596105	4595911;4595919;4595905	474	387	282	135	134	187	7.78525	6.25844	4.62705	2.21	2.3571	2.46656	4.627	3.71958	2.74999	1.31347	1.40089	1.46595	1.40843	0.0502015	1	+	+	+	-	-	-	Intron (XR_003305069.1/411986, intron 1 of 23)	4305953	4645432	339480	2	411986	#NAME?	49327	GO:0003682::chromatin binding;GO:0009523::photosystem II;GO:0015979::photosynthesis;GO:0016020::membrane;GO:0042301::phosphate ion binding;GO:0050821::protein stabilization
NC_037642.1	11440005	11440647	11440357;11440437;11440082;11440323;11440460;11440361;11440449	463	526	473	340	331	447	7.60496	8.50051	7.7499	5.54125	5.79672	5.87776	2.66411	2.97783	2.71489	1.94117	2.03066	2.05905	0.470587	0.00870772	1	+	+	+	-	-	-	Promoter (<=1kb)	11441083	11444363	3281	1	412232	#NAME?	-436	GO:0003887::DNA-directed DNA polymerase activity;GO:0005515::protein binding
NC_037644.1	1387979	1389138	1388563;1388867;1388341;1388568;1388444	464	582	518	363	332	502	7.62135	9.40379	8.48565	5.915	5.81418	6.59936	1.47993	1.82604	1.64776	1.14859	1.12901	1.28148	0.477016	0.0268939	1	+	+	+	-	-	-	Exon (XM_006559157.3/412274, exon 7 of 8)	1387249	1395751	8503	2	412274	#NAME?	6613	GO:0005515::protein binding;GO:0016020::membrane
NC_037639.1	9422737	9423502	9422847;9422852;9422871;9423294;9423303	445	443	358	237	230	280	7.30994	7.16172	5.86965	3.8675	4.03326	3.68672	2.14957	2.10598	1.72604	1.13728	1.18603	1.08412	0.811846	0.0197564	1	+	+	+	-	-	-	Intron (XM_006564718.3/412330, intron 2 of 4)	9400286	9442444	42159	2	412330	#NAME?	18942	GO:0000808::origin recognition complex;GO:0004252::serine-type endopeptidase activity;GO:0005515::protein binding;GO:0005634::nucleus;GO:0005886::plasma membrane;GO:0005887::integral component of plasma membrane;GO:0006260::DNA replication;GO:0008565::protein transporter activity;GO:0008948::oxaloacetate decarboxylase activity;GO:0015031::protein transport;GO:0015078::hydrogen ion transmembrane t…
NC_037644.1	4724881	4725873	4725128;4725015;4725139;4725611;4725739;4725719	465	521	463	287	342	347	7.63774	8.41986	7.5864	4.68	5.98878	4.56576	1.73254	1.90995	1.72089	1.06161	1.35849	1.03569	0.634128	0.010799	1	+	+	+	-	-	-	Promoter (2-3kb)	4722868	4729199	6332	1	412332	#NAME?	2013	.
NC_037643.1	16605067	16605453	16605336;16605308;16605312	210	271	224	116	145	223	3.45829	4.38736	3.67875	1.90125	2.54916	2.93888	2.01288	2.55363	2.14119	1.10661	1.48372	1.71056	0.641184	0.0290434	1	+	+	+	-	-	-	Promoter (<=1kb)	16604339	16605938	1600	2	412366	#NAME?	485	GO:0005506::iron ion binding;GO:0016226::iron-sulfur cluster assembly;GO:0051536::iron-sulfur cluster binding
NC_037641.1	1866792	1867056	1866908;1866925;1866919	189	206	223	93	133	196	3.1141	3.33891	3.6624	1.5275	2.33964	2.58464	2.647	2.83808	3.11305	1.29838	1.9887	2.19695	0.648786	0.0432147	1	+	+	+	-	-	-	Intron (XM_026440175.1/412540, intron 1 of 9)	1808333	1874380	66048	2	412540	#NAME?	7324	GO:0016021::integral component of membrane;GO:0022857::transmembrane transporter activity;GO:0055085::transmembrane transport
NC_037648.1	10519485	10520059	10519866;10519878;10519881	448	330	339	89	122	66	7.35911	5.33903	5.559	1.4625	2.14758	0.87904	2.88286	2.09152	2.17769	0.572921	0.841294	0.344356	2.02396	0.00699373	1	+	+	+	-	-	-	Promoter (2-3kb)	10422253	10522291	100039	2	412591	#NAME?	2232	GO:0004930::G-protein coupled receptor activity;GO:0007186::G-protein coupled receptor signaling pathway;GO:0016020::membrane;GO:0016021::integral component of membrane
NC_037648.1	10515940	10516339	10516215;10516206;10516218	279	288	265	32	103	64	4.5892	4.66157	4.3491	0.53625	1.81584	0.8528	2.5843	2.62506	2.4491	0.301977	1.02255	0.480235	2.08525	0.00894505	1	+	+	+	-	-	-	Intron (XM_016914957.2/412591, intron 1 of 12)	10422253	10522291	100039	2	412591	#NAME?	5952	GO:0004930::G-protein coupled receptor activity;GO:0007186::G-protein coupled receptor signaling pathway;GO:0016020::membrane;GO:0016021::integral component of membrane
NC_037644.1	12354660	12354938	12354776;12354814;12354832	220	181	182	152	82	161	3.62219	2.93566	2.99205	2.48625	1.44918	2.12544	2.92438	2.37011	2.41563	2.00728	1.17	1.71598	0.655961	0.0410818	1	+	+	+	-	-	-	Exon (XM_026441628.1/413433, exon 12 of 15)	12345988	12348840	2853	2	412755	#NAME?	-5820	GO:0005515::protein binding
NC_037650.1	10593839	10594106	10593970;10593982;10593992	206	198	198	132	158	193	3.39273	3.20987	3.25365	2.16125	2.77614	2.54528	2.85155	2.69786	2.73465	1.81651	2.33331	2.13928	0.397486	0.0381282	1	+	+	+	-	-	-	Distal Intergenic	10599903	10658392	58490	1	412934	#NAME?	-5797	GO:0003677::DNA binding;GO:0005216::ion channel activity;GO:0006811::ion transport;GO:0016020::membrane;GO:0051260::protein homooligomerization;GO:0055085::transmembrane transport
NC_037642.1	5280514	5280963	5280627;5280603;5280834;5280627	286	314	276	246	301	364	4.70393	5.08095	4.52895	4.01375	5.27292	4.7888	2.35459	2.54331	2.267	2.00911	2.6394	2.39707	0.0242267	0.856711	1	+	+	+	-	-	-	Intron (XM_006562180.3/413021, intron 1 of 35)	5157589	5284165	126577	2	413021	#NAME?	3202	GO:0003677::DNA binding;GO:0004222::metalloendopeptidase activity;GO:0004867::serine-type endopeptidase inhibitor activity;GO:0005102::receptor binding;GO:0005515::protein binding;GO:0005576::extracellular region;GO:0007155::cell adhesion;GO:0008233::peptidase activity;GO:0014068::positive regulation of phosphatidylinositol 3-kinase signaling;GO:0016020::membrane;GO:0016021::integral component of…
NC_037639.1	4479124	4480029	4479324;4479718;4479397;4479747;4479522;4479740	465	510	396	328	256	378	7.63774	8.24243	6.49095	5.34625	4.48722	4.97248	1.8989	2.04924	1.61379	1.32919	1.11562	1.23626	0.59546	0.0232689	1	+	+	+	-	-	-	Promoter (<=1kb)	4479048	4487785	8738	1	413147	#NAME?	76	GO:0003676::nucleic acid binding;GO:0004386::helicase activity;GO:0005524::ATP binding;GO:0008654::phospholipid biosynthetic process;GO:0008750::NAD(P)+ transhydrogenase (AB-specific) activity;GO:0016020::membrane;GO:0016021::integral component of membrane;GO:0016780::phosphotransferase activity, for other substituted phosphate groups;GO:0050661::NADP binding;GO:0055114::oxidation-reduction proce…
NC_037644.1	2007767	2008076	2007935;2007927;2007943	268	225	191	32	101	77	4.40891	3.64538	3.1392	0.53625	1.78092	1.02336	3.20358	2.64879	2.28099	0.389648	1.29404	0.743589	1.74451	0.00717287	1	+	+	+	-	-	-	Intron (XM_006559812.3/413153, intron 1 of 7)	2002798	2088274	85477	1	413153	#NAME?	4969	GO:0004672::protein kinase activity;GO:0005524::ATP binding;GO:0006468::protein phosphorylation
NC_037649.1	9998204	9998662	9998404;9998392;9998402	515	335	287	191	150	225	8.45724	5.41968	4.7088	3.12	2.63646	2.96512	4.15033	2.65967	2.31081	1.53112	1.29382	1.45511	1.09153	0.101395	1	+	+	+	-	-	-	Intron (XM_026444190.1/413224, intron 2 of 16)	9969319	10009732	40414	2	413224	#NAME?	11070	GO:0006629::lipid metabolic process;GO:0009882::blue light photoreceptor activity;GO:0071949::FAD binding
NC_037638.1	14849442	14850119	14849676;14849755;14849714	303	400	321	234	217	310	4.98256	6.46813	5.2647	3.81875	3.80628	4.08032	1.65535	2.1489	1.74908	1.2687	1.26455	1.3556	0.514009	0.0620503	1	+	+	+	-	-	-	Promoter (<=1kb)	14848573	14851051	2479	2	413228	#NAME?	932	GO:0003870::5-aminolevulinate synthase activity;GO:0005759::mitochondrial matrix;GO:0006520::cellular amino acid metabolic process;GO:0006778::porphyrin-containing compound metabolic process;GO:0009058::biosynthetic process;GO:0016829::lyase activity;GO:0030170::pyridoxal phosphate binding
NC_037647.1	668221	668605	668391;668407;668409	456	327	404	89	132	180	7.49023	5.29064	6.62175	1.4625	2.32218	2.37472	4.38229	3.09538	3.87417	0.855661	1.35863	1.38937	1.65539	0.00986291	1	+	+	+	-	-	-	Intron (XM_006557264.3/413242, intron 1 of 11)	527331	704313	176983	2	413242	#NAME?	35708	GO:0006506::GPI anchor biosynthetic process;GO:0008146::sulfotransferase activity;GO:0015016::[heparan sulfate]-glucosamine N-sulfotransferase activity;GO:0016021::integral component of membrane;GO:0016787::hydrolase activity;GO:0017176::phosphatidylinositol N-acetylglucosaminyltransferase activity
NC_037647.1	666176	666588	666367;666361;666392	357	253	241	184	192	217	5.86762	4.09702	3.9567	3.00625	3.36978	2.86016	3.20021	2.23452	2.15799	1.63961	1.83788	1.55994	0.591928	0.11902	1	+	+	+	-	-	-	Intron (XM_006557264.3/413242, intron 1 of 11)	527331	704313	176983	2	413242	#NAME?	37725	GO:0006506::GPI anchor biosynthetic process;GO:0008146::sulfotransferase activity;GO:0015016::[heparan sulfate]-glucosamine N-sulfotransferase activity;GO:0016021::integral component of membrane;GO:0016787::hydrolase activity;GO:0017176::phosphatidylinositol N-acetylglucosaminyltransferase activity
NC_037647.1	664972	665412	665072;665310;665066;665082	210	262	257	124	144	189	3.45829	4.24219	4.2183	2.03125	2.5317	2.4928	1.7664	2.1668	2.15459	1.03751	1.29312	1.27325	0.756365	0.00959553	1	+	+	+	-	-	-	Intron (XM_006557264.3/413242, intron 1 of 11)	527331	704313	176983	2	413242	#NAME?	38901	GO:0006506::GPI anchor biosynthetic process;GO:0008146::sulfotransferase activity;GO:0015016::[heparan sulfate]-glucosamine N-sulfotransferase activity;GO:0016021::integral component of membrane;GO:0016787::hydrolase activity;GO:0017176::phosphatidylinositol N-acetylglucosaminyltransferase activity
NC_037641.1	5104499	5104818	5104627;5104617;5104632	202	186	217	177	135	201	3.32717	3.01631	3.5643	2.8925	2.37456	2.65024	2.34202	2.12321	2.50894	2.03606	1.67147	1.86553	0.323553	0.0384864	1	+	+	+	-	-	-	Intron (XM_006560583.3/413399, intron 2 of 21)	5057625	5131172	73548	2	413399	#NAME?	26354	GO:0008270::zinc ion binding;GO:0016021::integral component of membrane
NC_037644.1	1503299	1503571	1503452;1503464;1503456	246	236	240	178	190	269	4.04833	3.82281	3.94035	2.90875	3.33486	3.5424	3.34026	3.15418	3.25116	2.39999	2.75158	2.92282	0.271398	0.0557487	1	+	+	+	-	-	-	Intron (XM_006559145.3/413410, intron 2 of 8)	1489969	1497606	7638	2	413410	#NAME?	-5693	GO:0005086::ARF guanyl-nucleotide exchange factor activity;GO:0005515::protein binding;GO:0032012::regulation of ARF protein signal transduction
NC_037643.1	4166942	4167512	4167093;4167378;4167106;4167392	399	352	329	204	221	345	6.556	5.69389	5.3955	3.33125	3.87612	4.53952	2.58624	2.24615	2.12844	1.31413	1.52907	1.79077	0.587012	0.0162968	1	+	+	+	-	-	-	Intron (XM_026441387.1/413785, intron 1 of 3)	4124410	4225836	101427	1	413785	#NAME?	42532	GO:0003677::DNA binding;GO:0005509::calcium ion binding;GO:0005578::proteinaceous extracellular matrix;GO:0006355::regulation of transcription, DNA-templated;GO:0006457::protein folding;GO:0007165::signal transduction
NC_037650.1	2058150	2058480	2058309;2058316;2058322	313	222	381	40	135	49	5.14646	3.59699	6.2457	0.66625	2.37456	0.656	3.50225	2.44781	4.2503	0.453394	1.61593	0.446419	2.01957	0.0198883	1	+	+	+	-	-	-	Intron (XM_026444727.1/727444, intron 4 of 4)	2088521	2094507	5987	2	413980	#NAME?	36027	GO:0003824::catalytic activity;GO:0004866::endopeptidase inhibitor activity;GO:0005515::protein binding;GO:0005576::extracellular region;GO:0005615::extracellular space
NC_037650.1	2059563	2059872	2059722;2059726;2059735	290	260	278	12	106	46	4.76949	4.20993	4.56165	0.21125	1.86822	0.61664	3.46559	3.059	3.31457	0.153498	1.35748	0.44806	2.32839	0.0120216	1	+	+	+	-	-	-	Intron (XM_026444727.1/727444, intron 4 of 4)	2088521	2094507	5987	2	413980	#NAME?	34635	GO:0003824::catalytic activity;GO:0004866::endopeptidase inhibitor activity;GO:0005515::protein binding;GO:0005576::extracellular region;GO:0005615::extracellular space
NC_037648.1	9058306	9058558	9058426;9058432;9058430	200	154	166	161	129	174	3.29439	2.50015	2.73045	2.6325	2.2698	2.296	2.93306	2.22593	2.43097	2.34377	2.02085	2.04417	0.244042	0.193909	1	+	+	+	-	-	-	Promoter (<=1kb)	9058382	9068098	9717	1	550655	#NAME?	0	GO:0016851::magnesium chelatase activity
NC_037650.1	10330386	10330780	10330647;10330673;10330619	230	263	233	189	192	233	3.78609	4.25832	3.8259	3.0875	3.36978	3.07008	2.15904	2.42833	2.18174	1.76066	1.92164	1.75073	0.317209	0.017221	1	+	+	+	-	-	-	3' UTR	10326999	10330830	3832	1	550798	#NAME?	3387	GO:0005198::structural molecule activity;GO:0016020::membrane;GO:0019028::viral capsid;GO:0019031::viral envelope;GO:0030472::mitotic spindle organization in nucleus;GO:0042729::DASH complex;GO:0072686::mitotic spindle
NC_037649.1	3079793	3080310	3080022;3080015;3079989;3080123	310	334	338	195	208	251	5.09729	5.40355	5.54265	3.185	3.64914	3.30624	2.21654	2.34972	2.41021	1.38499	1.58682	1.43771	0.661876	0.000512377	1	+	+	+	-	-	-	Promoter (2-3kb)	3077569	3085347	7779	1	550829	#NAME?	2224	GO:0003677::DNA binding;GO:0003899::DNA-directed RNA polymerase activity;GO:0005665::DNA-directed RNA polymerase II, core complex;GO:0006351::transcription, DNA-templated;GO:0006366::transcription from RNA polymerase II promoter
NC_037648.1	15098638	15098919	15098752;15098752;15098747	237	299	203	102	115	190	3.90082	4.839	3.3354	1.67375	2.02536	2.50592	3.11583	3.86521	2.66419	1.33693	1.61778	2.00163	0.960539	0.0278588	1	+	+	+	-	-	-	Exon (XM_026443615.1/550935, exon 7 of 13)	15094307	15102991	8685	2	550935	#NAME?	4072	GO:0003676::nucleic acid binding;GO:0005634::nucleus;GO:0006694::steroid biosynthetic process;GO:0008168::methyltransferase activity
NC_037648.1	7243718	7244060	7243820;7243851;7243886	190	186	211	144	137	190	3.13049	3.01631	3.4662	2.35625	2.40948	2.50592	2.05582	1.98084	2.27628	1.54737	1.58233	1.64566	0.402704	0.0203941	1	+	+	+	-	-	-	Exon (XM_623510.5/551114, exon 4 of 6)	7238138	7241575	3438	1	551162	#NAME?	5580	.
NC_037653.1	1096544	1097401	1096604;1096932;1096895;1097161;1096928;1097177	639	795	617	368	436	582	10.4896	12.8395	10.1043	5.99625	7.63002	7.64896	2.75384	3.37076	2.65268	1.5742	2.00311	2.00808	0.652115	0.0221779	1	+	+	+	-	-	-	Promoter (1-2kb)	1095078	1098007	2930	1	551329	#NAME?	1466	GO:0002949::tRNA threonylcarbamoyladenosine modification;GO:0003676::nucleic acid binding;GO:0003723::RNA binding;GO:0003724::RNA helicase activity;GO:0005524::ATP binding;GO:0006281::DNA repair;GO:0006310::DNA recombination;GO:0006355::regulation of transcription, DNA-templated;GO:0008134::transcription factor binding;GO:0008233::peptidase activity;GO:0009372::quorum sensing;GO:0009378::four-way…
NC_037644.1	1373168	1374139	1373295;1373583;1373857;1373318;1373601;1373880	1107	1029	929	789	711	936	18.1601	16.6139	15.2055	12.8375	12.4315	12.2934	4.20841	3.8501	3.52372	2.97496	2.88087	2.84887	0.412047	0.0359477	1	+	+	+	-	-	-	Exon (XM_006559158.3/551349, exon 7 of 7)	1372021	1377469	5449	2	551349	#NAME?	3330	.
NC_037642.1	13141615	13142412	13141680;13141928;13142242;13142057;13142302	741	626	696	682	437	587	12.1614	10.1135	11.3959	11.0988	7.64748	7.71456	3.43279	2.85473	3.21671	3.13285	2.15865	2.17758	0.347639	0.15788	1	+	+	+	-	-	-	Promoter (<=1kb)	13140939	13143297	2359	1	551369	#NAME?	676	GO:0006812::cation transport;GO:0016021::integral component of membrane;GO:0016887::ATPase activity
NC_037648.1	15426569	15427619	15426644;15426937;15427238;15427503;15426758;15427252;15427514	382	553	466	369	336	428	6.27737	8.93602	7.63545	6.0125	5.88402	5.62848	1.34537	1.91517	1.63643	1.2886	1.26107	1.2063	0.382706	0.144176	1	+	+	+	-	-	-	Promoter (1-2kb)	15421476	15425383	3908	2	551493	#NAME?	-1186	GO:0000398::mRNA splicing, via spliceosome;GO:0005515::protein binding;GO:0005634::nucleus;GO:0006397::mRNA processing
NC_037649.1	3072665	3072972	3072768;3072808;3072823	227	271	259	197	193	233	3.73692	4.38736	4.251	3.2175	3.38724	3.07008	2.73294	3.20863	3.1089	2.35307	2.4772	2.24525	0.355154	0.0291013	1	+	+	+	-	-	-	Promoter (<=1kb)	3069338	3072314	2977	2	551549	#NAME?	-351	GO:0007224::smoothened signaling pathway;GO:0016021::integral component of membrane
NC_037643.1	13270332	13271078	13270510;13270605;13270622	415	471	394	230	210	360	6.81824	7.61336	6.45825	3.75375	3.68406	4.73632	2.05598	2.29574	1.94743	1.13191	1.11089	1.42819	0.778983	0.00380459	1	+	+	+	-	-	-	Promoter (1-2kb)	13272300	13275366	3067	1	551952	#NAME?	-1222	GO:0016787::hydrolase activity
NC_037644.1	12751818	12752087	12751956;12751962;12751951	434	605	547	252	289	539	7.12965	9.77478	8.9598	4.11125	5.0634	7.0848	5.948	8.15473	7.47483	3.42986	4.2242	5.91058	0.66968	0.0534483	1	+	+	+	-	-	-	Promoter (<=1kb)	12742945	12752627	9683	2	552048	#NAME?	540	GO:0005506::iron ion binding;GO:0009055::electron carrier activity;GO:0015979::photosynthesis;GO:0020037::heme binding;GO:0031361::integral component of thylakoid membrane
NC_037642.1	7736443	7736706	7736594;7736602;7736581	370	278	309	242	232	250	6.08069	4.50027	5.0685	3.94875	4.06818	3.29312	5.18818	3.83973	4.32456	3.36916	3.47106	2.80977	0.468508	0.0689511	1	+	+	+	-	-	-	Intron (XM_016912223.2/552079, intron 6 of 12)	7660753	8093347	432595	1	552079	#NAME?	75690	GO:0003677::DNA binding;GO:0005615::extracellular space;GO:0006355::regulation of transcription, DNA-templated
NC_037642.1	7725061	7725367	7725237;7725220;7725202	538	335	383	286	270	382	8.83421	5.41968	6.2784	4.66375	4.73166	5.02496	6.4818	3.97651	4.60656	3.42187	3.4717	3.68689	0.509786	0.184004	1	+	+	+	-	-	-	Intron (XM_016912223.2/552079, intron 6 of 12)	7660753	8093347	432595	1	552079	#NAME?	64308	GO:0003677::DNA binding;GO:0005615::extracellular space;GO:0006355::regulation of transcription, DNA-templated
NC_037638.1	22127550	22127792	22127644;22127664;22127663	231	193	182	112	82	93	3.80248	3.12922	2.99205	1.83625	1.44918	1.23328	3.52474	2.90066	2.77351	1.70213	1.34333	1.1432	1.13497	0.00580944	1	+	+	+	-	-	-	Intron (XM_006571348.3/552142, intron 1 of 17)	21819932	22111800	291869	2	552142	#NAME?	-15750	GO:0004930::G-protein coupled receptor activity;GO:0007186::G-protein coupled receptor signaling pathway;GO:0016020::membrane;GO:0016021::integral component of membrane;GO:0030246::carbohydrate binding
NC_037649.1	898554	898972	898745;898701;898824	216	246	252	162	133	186	3.55663	3.98411	4.13655	2.64875	2.33964	2.45344	1.91201	2.14182	2.22377	1.42395	1.25777	1.31895	0.649976	0.00543741	1	+	+	+	-	-	-	Promoter (1-2kb)	896703	900951	4249	1	552156	#NAME?	1851	GO:0003677::DNA binding;GO:0003899::DNA-directed RNA polymerase activity;GO:0005515::protein binding;GO:0006351::transcription, DNA-templated
NC_037641.1	1937980	1938297	1938130;1938131;1938178	270	182	222	50	88	84	4.44169	2.95179	3.64605	0.82875	1.55394	1.1152	3.14621	2.09086	2.58263	0.587034	1.10071	0.789936	1.65812	0.0145866	1	+	+	+	-	-	-	Intron (XM_026439979.1/726755, intron 3 of 5)	1919771	1921443	1673	1	552304	NM_001160270.1	18209	GO:0005515::protein binding
NC_037638.1	11601172	11601562	11601267;11601254;11601268;11601460	266	266	248	180	172	255	4.37613	4.30671	4.07115	2.94125	3.02058	3.35872	2.52104	2.48105	2.34535	1.69442	1.74012	1.93492	0.452462	0.00274556	1	+	+	+	-	-	-	Promoter (<=1kb)	11592017	11601395	9379	2	552371	#NAME?	0	GO:0003924::GTPase activity;GO:0005524::ATP binding;GO:0005525::GTP binding;GO:0016020::membrane;GO:0016887::ATPase activity
NC_037646.1	1546000	1546396	1546085;1546287;1546304	215	228	237	170	180	216	3.54024	3.69377	3.8913	2.77875	3.16026	2.84704	2.00867	2.09578	2.20786	1.57661	1.79308	1.61536	0.340559	0.00778878	1	+	+	+	-	-	-	Intron (XM_624841.6/552467, intron 2 of 2)	1541638	1547588	5951	1	552467	#NAME?	4362	GO:0003676::nucleic acid binding;GO:0003723::RNA binding
NC_037641.1	111359	111627	111491;111508;111516	238	174	181	42	98	62	3.91721	2.82275	2.9757	0.69875	1.72854	0.82656	3.28013	2.36367	2.49174	0.585108	1.44742	0.692131	1.57816	0.0103296	1	+	+	+	-	-	-	Intron (XM_006557336.3/552608, intron 1 of 5)	93889	142196	48308	1	552608	#NAME?	17470	GO:0019031::viral envelope
NC_037640.1	461066	461469	461177;461213;461171	229	285	232	140	144	193	3.7697	4.61318	3.80955	2.29125	2.5317	2.54528	2.1018	2.57209	2.12402	1.27749	1.41155	1.41913	0.726596	0.0207152	1	+	+	+	-	-	-	Promoter (1-2kb)	460043	461519	1477	1	552649	#NAME?	1023	GO:0003746::translation elongation factor activity;GO:0005853::eukaryotic translation elongation factor 1 complex;GO:0006414::translational elongation;GO:0051302::regulation of cell division
NC_037649.1	8652640	8652965	8652796;8652777;8652823	170	216	189	99	108	190	2.80269	3.50021	3.1065	1.625	1.90314	2.50592	1.93653	2.41848	2.14645	1.1228	1.31498	1.73147	0.640974	0.0294536	1	+	+	+	-	-	-	Promoter (2-3kb)	8649580	8655267	5688	2	552765	#NAME?	2302	GO:0004418::hydroxymethylbilane synthase activity;GO:0007165::signal transduction;GO:0033014::tetrapyrrole biosynthetic process;GO:0046872::metal ion binding
NC_037646.1	10657434	10657715	10657544;10657545;10657544	544	630	564	192	385	465	8.93255	10.178	9.23775	3.13625	6.73956	6.11392	7.13498	8.1298	7.37876	2.50512	5.3833	4.88357	0.826117	0.0536271	1	+	+	+	-	-	-	Downstream (2-3kb)	10659971	10668214	8244	2	724178	#NAME?	10499	GO:0000087::mitotic M phase;GO:0004252::serine-type endopeptidase activity;GO:0004725::protein tyrosine phosphatase activity;GO:0005622::intracellular;GO:0005634::nucleus;GO:0005739::mitochondrion;GO:0005886::plasma membrane;GO:0006338::chromatin remodeling;GO:0006470::protein dephosphorylation;GO:0090544::BAF-type complex
NC_037649.1	9518751	9519039	9518864;9518886;9518894	202	209	196	191	132	212	3.32717	3.3873	3.22095	3.12	2.32218	2.79456	2.59325	2.64011	2.51046	2.43177	1.80994	2.17812	0.270508	0.128946	1	+	+	+	-	-	-	Intron (XM_026444341.1/724243, intron 1 of 11)	9315781	9622683	306903	2	724243	#NAME?	103644	GO:0000166::nucleotide binding;GO:0000398::mRNA splicing, via spliceosome;GO:0001104::RNA polymerase II transcription cofactor activity;GO:0003852::2-isopropylmalate synthase activity;GO:0004252::serine-type endopeptidase activity;GO:0005515::protein binding;GO:0005681::spliceosomal complex;GO:0005789::endoplasmic reticulum membrane;GO:0005886::plasma membrane;GO:0006323::DNA packaging;GO:0006357…
NC_037639.1	3902176	3902439	3902294;3902317;3902321	478	360	396	166	261	287	7.85081	5.82293	6.49095	2.71375	4.57452	3.77856	6.69849	4.96826	5.53823	2.31543	3.90309	3.22395	0.865589	0.019943	1	+	+	+	-	-	-	Promoter (1-2kb)	3903780	3909867	6088	1	724275	#NAME?	-1341	GO:0008289::lipid binding;GO:0042754::negative regulation of circadian rhythm;GO:0045892::negative regulation of transcription, DNA-templated
NC_037646.1	6048818	6049147	6048963;6049003;6048979	178	277	179	68	92	77	2.93381	4.48414	2.943	1.12125	1.62378	1.02336	2.00256	3.06078	2.00883	0.765341	1.10836	0.698523	1.45914	0.0384195	1	+	+	+	-	-	-	Distal Intergenic	6043644	6046657	3014	1	724315	#NAME?	5174	GO:0003700::sequence-specific DNA binding transcription factor activity;GO:0006355::regulation of transcription, DNA-templated;GO:0009405::pathogenesis;GO:0016021::integral component of membrane;GO:0043565::sequence-specific DNA binding
NC_037648.1	8926846	8927083	8926950;8926970;8926959	268	359	286	178	143	217	4.40891	5.8068	4.69245	2.90875	2.51424	2.86016	4.17273	5.49574	4.44109	2.75293	2.37956	2.70695	0.847851	0.0275754	1	+	+	+	-	-	-	3' UTR	8800311	8917765	117455	2	724336	#NAME?	-9081	GO:0003723::RNA binding;GO:0003724::RNA helicase activity;GO:0004161::dimethylallyltranstransferase activity;GO:0005524::ATP binding;GO:0008033::tRNA processing;GO:0009058::biosynthetic process;GO:0016887::ATPase activity
NC_037648.1	8923432	8923904	8923744;8923729;8923757	504	405	399	287	219	376	8.27695	6.54878	6.54	4.68	3.8412	4.94624	3.94163	3.11864	3.11446	2.2287	1.82925	2.35549	0.665823	0.0257466	1	+	+	+	-	-	-	3' UTR	8800311	8917765	117455	2	724336	#NAME?	-5667	GO:0003723::RNA binding;GO:0003724::RNA helicase activity;GO:0004161::dimethylallyltranstransferase activity;GO:0005524::ATP binding;GO:0008033::tRNA processing;GO:0009058::biosynthetic process;GO:0016887::ATPase activity
NC_037644.1	10845936	10846192	10846041;10846064;10846071	223	177	211	85	126	157	3.67136	2.87114	3.4662	1.3975	2.21742	2.07296	3.21781	2.51645	3.03799	1.22486	1.94349	1.81687	0.815292	0.0145382	1	+	+	+	-	-	-	Intron (XM_026441673.1/724518, intron 1 of 11)	10778033	10826692	48660	2	724518	#NAME?	-19244	GO:0003677::DNA binding;GO:0006310::DNA recombination;GO:0007224::smoothened signaling pathway
NC_037646.1	7482101	7482339	7482221;7482218;7482224	240	237	197	142	168	230	3.94999	3.83894	3.2373	2.32375	2.95074	3.03072	3.72276	3.61809	3.05107	2.19007	2.78099	2.85637	0.408851	0.0448815	1	+	+	+	-	-	-	Promoter (<=1kb)	7480790	7482196	1407	2	724583	#NAME?	0	GO:0005215::transporter activity;GO:0006810::transport;GO:0016020::membrane
NC_037650.1	4568025	4568584	4568121;4568130;4568382;4568138;4568498	501	590	589	499	416	615	8.22778	9.53283	9.6465	8.125	7.28082	8.08192	3.30949	3.83443	3.88015	3.26815	2.92859	3.25082	0.222642	0.0836505	1	+	+	+	-	-	-	Promoter (1-2kb)	4566320	4603276	36957	1	724592	#NAME?	1705	GO:0001104::RNA polymerase II transcription cofactor activity;GO:0003677::DNA binding;GO:0004190::aspartic-type endopeptidase activity;GO:0005198::structural molecule activity;GO:0005515::protein binding;GO:0005634::nucleus;GO:0005672::transcription factor TFIIA complex;GO:0005739::mitochondrion;GO:0005789::endoplasmic reticulum membrane;GO:0006270::DNA replication initiation;GO:0006357::regulati…
NC_037638.1	24154108	24154343	24154225;24154225;24154249	246	267	269	134	164	269	4.04833	4.32284	4.4145	2.19375	2.8809	3.5424	3.86394	4.12595	4.21343	2.09383	2.74968	3.38105	0.569262	0.0609759	1	+	+	+	-	-	-	Promoter (1-2kb)	24153019	24153583	565	1	724639	#NAME?	1089	.
NC_037639.1	15269536	15269889	15269736;15269728;15269756	505	689	753	225	390	435	8.29334	11.1297	12.3279	3.6725	6.82686	5.72032	5.27707	7.08185	7.84427	2.33682	4.34394	3.63985	0.969054	0.029379	1	+	+	+	-	-	-	Promoter (1-2kb)	15268103	15273587	5485	1	724734	#NAME?	1433	GO:0003677::DNA binding;GO:0003700::sequence-specific DNA binding transcription factor activity;GO:0004930::G-protein coupled receptor activity;GO:0005515::protein binding;GO:0006352::DNA-templated transcription, initiation;GO:0006355::regulation of transcription, DNA-templated;GO:0007186::G-protein coupled receptor signaling pathway;GO:0016021::integral component of membrane;GO:0016987::sigma fa…
NC_037648.1	10059879	10060173	10060026;10060027;10060052	230	224	203	128	162	208	3.78609	3.62925	3.3354	2.09625	2.84598	2.74208	2.89092	2.77116	2.54679	1.60062	2.17308	2.09375	0.484448	0.0293803	1	+	+	+	-	-	-	Promoter (2-3kb)	10058841	10062510	3670	2	724770	#NAME?	2337	.
NC_037652.1	834252	834596	834438;834431;834428	320	206	205	32	82	80	5.26119	3.33891	3.3681	0.53625	1.44918	1.06272	3.43504	2.17998	2.19904	0.350118	0.946171	0.693851	1.9732	0.028867	1	+	+	+	-	-	-	Intron (XM_026445672.1/724865, intron 1 of 11)	818668	841877	23210	2	724865	#NAME?	7281	GO:0003677::DNA binding;GO:0003924::GTPase activity;GO:0005524::ATP binding;GO:0005525::GTP binding;GO:0005664::nuclear origin of replication recognition complex;GO:0006260::DNA replication;GO:0016020::membrane;GO:0016887::ATPase activity
NC_037641.1	12785607	12786349	12785898;12786111;12785902;12786137;12785890;12786135	2514	2754	2098	1055	1213	1902	41.2208	44.4381	34.3186	17.16	21.1964	24.9674	12.4967	13.472	10.4042	5.20229	6.42599	7.56922	0.921944	0.00874533	1	+	+	+	-	-	-	Intron (XM_006569316.3/409949, intron 1 of 8)	12792089	12823876	31788	1	724973	#NAME?	-5740	GO:0004222::metalloendopeptidase activity;GO:0004672::protein kinase activity;GO:0004713::protein tyrosine kinase activity;GO:0004871::signal transducer activity;GO:0005524::ATP binding;GO:0005925::focal adhesion;GO:0006468::protein phosphorylation;GO:0006508::proteolysis;GO:0007172::signal complex assembly;GO:0009847::spore germination;GO:0016020::membrane;GO:0016021::integral component of membr…
NC_037645.1	4540666	4541144	4540818;4540806;4540812	324	311	232	177	167	177	5.32675	5.03256	3.80955	2.8925	2.93328	2.33536	2.50492	2.36657	1.79145	1.3602	1.37938	1.09821	0.795881	0.0350723	1	+	+	+	-	-	-	Promoter (<=1kb)	4511467	4540248	28782	2	725021	#NAME?	-418	GO:0004252::serine-type endopeptidase activity;GO:0004571::mannosyl-oligosaccharide 1,2-alpha-mannosidase activity;GO:0004860::protein kinase inhibitor activity;GO:0005509::calcium ion binding;GO:0005576::extracellular region;GO:0006508::proteolysis;GO:0016020::membrane
NC_037638.1	17754860	17755077	17754971;17754974;17754984	251	282	215	77	83	73	4.13028	4.56479	3.5316	1.2675	1.46664	0.97088	4.26766	4.71662	3.64906	1.30966	1.51542	1.00317	1.72248	0.00393492	1	+	+	+	-	-	-	Intron (XM_006571083.3/100577365, intron 1 of 2)	17794796	17799327	4532	2	725151	#NAME?	44250	GO:0003677::DNA binding;GO:0006355::regulation of transcription, DNA-templated
NC_037640.1	12088920	12089184	12089058;12089071;12089045	624	631	599	385	286	401	10.2437	10.1942	9.81	6.2725	5.01102	5.27424	8.70718	8.6651	8.33853	5.33165	4.25938	4.48312	0.869327	0.00336653	1	+	+	+	-	-	-	Exon (XM_026439421.1/412243, exon 8 of 13)	12076898	12079719	2822	2	725167	#NAME?	-9201	GO:0004674::protein serine/threonine kinase activity
NC_037642.1	4975839	4976101	4975986;4975981;4975992	207	218	185	128	141	192	3.40912	3.53247	3.0411	2.09625	2.47932	2.53216	2.9198	3.02544	2.6046	1.79537	2.12346	2.16871	0.49004	0.00906319	1	+	+	+	-	-	-	Intron (XM_006561072.3/725211, intron 7 of 12)	4969833	4979540	9708	2	725211	#NAME?	3439	GO:0000413::protein peptidyl-prolyl isomerization;GO:0003755::peptidyl-prolyl cis-trans isomerase activity;GO:0006457::protein folding
NC_037649.1	1120907	1121490	1120999;1121336;1121326;1121342	457	549	607	217	348	388	7.50662	8.8715	9.9408	3.5425	6.09354	5.10368	2.89533	3.42177	3.8342	1.36635	2.3503	1.96851	0.836391	0.0196852	1	+	+	+	-	-	-	Intron (XM_026444364.1/551490, intron 1 of 24)	1140523	1150624	10102	1	725498	#NAME?	-19033	GO:0003735::structural constituent of ribosome;GO:0005622::intracellular;GO:0005840::ribosome;GO:0006412::translation;GO:0007160::cell-matrix adhesion
NC_037650.1	3765378	3765816	3765481;3765711;3765468;3765651;3765513	371	424	410	293	268	344	6.09708	6.85525	6.71985	4.7775	4.69674	4.5264	3.12841	3.51743	3.44795	2.45134	2.4099	2.3225	0.490664	0.00952757	1	+	+	+	-	-	-	3' UTR	3762157	3767575	5419	1	725501	#NAME?	3221	GO:0016787::hydrolase activity;GO:0016811::hydrolase activity, acting on carbon-nitrogen (but not peptide) bonds, in linear amides;GO:0046080::dUTP metabolic process
NC_037646.1	7821693	7822056	7821782;7821882;7821963	209	217	240	177	134	189	3.4419	3.51634	3.94035	2.8925	2.3571	2.4928	2.12992	2.17599	2.43837	1.78994	1.45862	1.5426	0.493289	0.00927604	1	+	+	+	-	-	-	3' UTR	7817962	7822900	4939	1	725596	#NAME?	3731	GO:0051262::protein tetramerization
NC_037644.1	12730286	12730884	12730345;12730674;12730673;12730708	318	334	356	177	180	275	5.22841	5.40355	5.83695	2.8925	3.16026	3.62112	1.96612	2.03198	2.19496	1.08771	1.1884	1.3617	0.767579	0.00139995	1	+	+	+	-	-	-	3' UTR	12724302	12726878	2577	1	725632	#NAME?	5984	GO:0005634::nucleus;GO:0006260::DNA replication
NC_037638.1	6012497	6012880	6012629;6012629;6012643	241	244	280	180	164	185	3.96638	3.95185	4.59435	2.94125	2.8809	2.44032	2.32664	2.31812	2.695	1.72531	1.68991	1.43147	0.598734	0.00726604	1	+	+	+	-	-	-	Distal Intergenic	6017412	6018397	986	2	725746	#NAME?	5517	GO:0000090::mitotic anaphase;GO:0000940::condensed chromosome outer kinetochore;GO:0005876::spindle microtubule;GO:0006891::intra-Golgi vesicle-mediated transport;GO:0007059::chromosome segregation;GO:0007067::mitotic nuclear division;GO:0008017::microtubule binding;GO:0017119::Golgi transport complex;GO:0031110::regulation of microtubule polymerization or depolymerization;GO:0051301::cell divisi…
NC_037640.1	7353216	7353466	7353334;7353320;7353339	161	152	191	151	132	187	2.65518	2.46789	3.1392	2.47	2.32218	2.46656	2.3828	2.21472	2.81716	2.21661	2.08396	2.21353	0.186819	0.232474	1	+	+	+	-	-	-	Distal Intergenic	7390973	7456091	65119	1	725792	#NAME?	-37507	GO:0003677::DNA binding;GO:0005515::protein binding;GO:0006865::amino acid transport;GO:0016020::membrane;GO:0046872::metal ion binding
NC_037643.1	17047942	17048381	17048215;17048216;17048202	399	417	280	117	150	142	6.556	6.74234	4.59435	1.9175	2.63646	1.87616	3.35624	3.45163	2.352	0.981633	1.34969	0.96047	1.47645	0.0209307	1	+	+	+	-	-	-	Promoter (1-2kb)	17050146	17062158	12013	1	725914	#NAME?	-1765	GO:0019031::viral envelope
NC_037651.1	4867023	4867262	4867129;4867133;4867144	193	182	197	71	94	69	3.17966	2.95179	3.2373	1.17	1.6587	0.9184	2.98426	2.77039	3.03835	1.0981	1.55677	0.86196	1.32208	0.00648319	1	+	+	+	-	-	-	Intron (XM_001121713.5/725926, intron 4 of 4)	4858653	4874461	15809	2	725926	#NAME?	7199	GO:0004656::procollagen-proline 4-dioxygenase activity;GO:0005783::endoplasmic reticulum;GO:0016702::oxidoreductase activity, acting on single donors with incorporation of molecular oxygen, incorporation of two atoms of oxygen;GO:0055114::oxidation-reduction process
NC_037638.1	3191746	3192088	3191936;3191935;3191951	336	236	218	113	144	210	5.52343	3.82281	3.58065	1.8525	2.5317	2.76832	3.62728	2.51047	2.35144	1.21655	1.66259	1.81798	0.853852	0.0701256	1	+	+	+	-	-	-	Promoter (1-2kb)	3193856	3197709	3854	1	726015	#NAME?	-1768	GO:0003896::DNA primase activity;GO:0004386::helicase activity;GO:0005524::ATP binding;GO:0005525::GTP binding;GO:0007264::small GTPase mediated signal transduction;GO:0008270::zinc ion binding;GO:0015556::C4-dicarboxylate transmembrane transporter activity;GO:0015740::C4-dicarboxylate transport;GO:0016021::integral component of membrane
NC_037639.1	1915871	1916195	1916006;1916070;1916087	250	266	210	108	127	184	4.11389	4.30671	3.44985	1.77125	2.23488	2.4272	2.85125	2.98489	2.39102	1.22762	1.54895	1.68224	0.883737	0.00628006	1	+	+	+	-	-	-	Promoter (<=1kb)	1915438	1919179	3742	1	726110	#NAME?	433	GO:0005261::cation channel activity;GO:0005515::protein binding;GO:0019076::viral release from host cell;GO:0032801::receptor catabolic process;GO:0033644::host cell membrane
NC_037638.1	34485	34889	34704;34737;34729	436	302	480	76	201	180	7.16243	4.88739	7.86435	1.25125	3.52692	2.37472	3.98356	2.71824	4.37396	0.695914	1.96158	1.32076	1.4772	0.0220396	1	+	+	+	-	-	-	Intron (XM_016917662.2/551448, intron 4 of 7)	28123	30958	2836	2	726145	#NAME?	-3527	GO:0005515::protein binding;GO:0006464::cellular protein modification process;GO:0015031::protein transport
NC_037646.1	8055901	8056243	8056120;8056070;8056126	219	229	211	168	126	192	3.6058	3.7099	3.4662	2.74625	2.21742	2.53216	2.36796	2.43632	2.27628	1.80348	1.4562	1.66289	0.524451	0.00908978	1	+	+	+	-	-	-	Promoter (<=1kb)	8056743	8120773	64031	1	726214	NM_001098220.1	-500	GO:0000398::mRNA splicing, via spliceosome;GO:0004222::metalloendopeptidase activity;GO:0005230::extracellular ligand-gated ion channel activity;GO:0005634::nucleus;GO:0005681::spliceosomal complex;GO:0006508::proteolysis;GO:0006810::transport;GO:0006811::ion transport;GO:0008270::zinc ion binding;GO:0016020::membrane
NC_037646.1	11076407	11077051	11076502;11076902;11076807;11076934	405	435	361	358	242	307	6.65434	7.03268	5.9187	5.83375	4.24278	4.04096	2.32387	2.456	2.06696	2.0373	1.48169	1.41121	0.473791	0.0633205	1	+	+	+	-	-	-	Exon (XM_006567451.3/726215, exon 2 of 4)	11073010	11084536	11527	1	726215	#NAME?	3397	GO:0000166::nucleotide binding;GO:0004812::aminoacyl-tRNA ligase activity;GO:0005524::ATP binding;GO:0006418::tRNA aminoacylation for protein translation
NC_037639.1	14758348	14758662	14758514;14758510;14758516	1037	1189	1121	912	741	1179	17.0128	19.1947	18.3447	14.8362	12.9553	15.4816	12.1655	13.7258	13.118	10.6091	9.2641	11.0706	0.334167	0.0201398	1	+	+	+	-	-	-	Promoter (<=1kb)	14750619	14758250	7632	2	726231	#NAME?	-98	GO:0004674::protein serine/threonine kinase activity;GO:0005856::cytoskeleton;GO:0008092::cytoskeletal protein binding;GO:0030866::cortical actin cytoskeleton organization
NC_037639.1	1298884	1299266	1299074;1299064;1299065	440	208	240	78	126	184	7.22799	3.37117	3.94035	1.28375	2.21742	2.4272	4.25094	1.98266	2.31741	0.755002	1.30411	1.42749	1.29427	0.130407	1	+	+	+	-	-	-	Distal Intergenic	1227620	1255760	28141	2	726292	#NAME?	-43124	GO:0005737::cytoplasm;GO:0006457::protein folding
NC_037650.1	2536916	2537468	2536970;2537219;2537191;2537407;2537184;2537414	551	493	511	388	342	501	9.04728	7.96822	8.3712	6.32125	5.98878	6.58624	3.68519	3.24566	3.4098	2.5748	2.43938	2.68274	0.425971	0.00830028	1	+	+	+	-	-	-	Promoter (1-2kb)	2536125	2539443	3319	2	726525	#NAME?	1975	GO:0004672::protein kinase activity;GO:0005524::ATP binding;GO:0006468::protein phosphorylation
NC_037638.1	20561553	20562068	20561926;20561946;20561940	259	452	371	260	216	400	4.2614	7.30689	6.0822	4.24125	3.78882	5.26112	1.86024	3.1897	2.65508	1.85144	1.65394	2.29665	0.409238	0.239556	1	+	+	+	-	-	-	Promoter (1-2kb)	20557814	20564060	6247	2	726591	#NAME?	1992	.
NC_037651.1	7890824	7891116	7890955;7890988;7890991	165	195	178	104	150	185	2.72074	3.16148	2.92665	1.70625	2.63646	2.44032	2.09164	2.43046	2.24993	1.31172	2.02684	1.87606	0.377027	0.125031	1	+	+	+	-	-	-	Promoter (<=1kb)	7886877	7890092	3216	2	726600	#NAME?	-732	GO:0005515::protein binding;GO:0006364::rRNA processing;GO:0032040::small-subunit processome
NC_037641.1	2910628	2910913	2910780;2910744;2910753	243	240	203	202	180	187	3.99916	3.88733	3.3354	3.29875	3.16026	2.46656	3.1497	3.06162	2.62693	2.59806	2.48899	1.94264	0.330299	0.0839467	1	+	+	+	-	-	-	Promoter (2-3kb)	2877430	2913341	35912	2	726671	#NAME?	2428	GO:0003676::nucleic acid binding;GO:0016020::membrane;GO:0016757::transferase activity, transferring glycosyl groups
NC_037641.1	2916335	2916680	2916433;2916488;2916541	194	205	200	197	154	177	3.19605	3.32278	3.28635	3.2175	2.7063	2.33536	2.08067	2.16318	2.13946	2.09464	1.76184	1.52035	0.247549	0.179036	1	+	+	+	-	-	-	Promoter (1-2kb)	2883959	2915217	31259	2	726671	#NAME?	-1118	GO:0003676::nucleic acid binding;GO:0016020::membrane;GO:0016757::transferase activity, transferring glycosyl groups
NC_037642.1	13670233	13670548	13670386;13670381;13670424	223	299	235	189	182	279	3.67136	4.839	3.8586	3.0875	3.19518	3.6736	2.61702	3.44933	2.75048	2.20083	2.27759	2.61861	0.313045	0.142953	1	+	+	+	-	-	-	Promoter (1-2kb)	13668634	13671765	3132	2	726776	#NAME?	1217	GO:0004672::protein kinase activity;GO:0005524::ATP binding;GO:0005576::extracellular region;GO:0006468::protein phosphorylation;GO:0009405::pathogenesis
NC_037644.1	1134517	1134915	1134616;1134628;1134637	238	251	213	193	188	237	3.91721	4.06476	3.4989	3.1525	3.29994	3.12256	2.21142	2.29471	1.97526	1.77971	1.86294	1.76281	0.261888	0.0530373	1	+	+	+	-	-	-	Intron (XM_026441622.1/726842, intron 4 of 6)	1069275	1182470	113196	2	726842	#NAME?	47555	GO:0003700::sequence-specific DNA binding transcription factor activity;GO:0005634::nucleus;GO:0006355::regulation of transcription, DNA-templated
NC_037644.1	5345496	5345824	5345596;5345614;5345629	224	264	179	111	132	162	3.68775	4.27445	2.943	1.82	2.32218	2.13856	2.52483	2.92652	2.01493	1.24607	1.58989	1.46417	0.79601	0.0433439	1	+	+	+	-	-	-	Intron (XM_016913181.2/727091, intron 2 of 7)	5302978	5523561	220584	1	727091	#NAME?	42518	GO:0003700::sequence-specific DNA binding transcription factor activity;GO:0005672::transcription factor TFIIA complex;GO:0006355::regulation of transcription, DNA-templated;GO:0006367::transcription initiation from RNA polymerase II promoter;GO:0009878::nodule morphogenesis;GO:0043565::sequence-specific DNA binding;GO:0046872::metal ion binding
NC_037644.1	5375235	5375888	5375362;5375871;5375371;5375387	304	400	307	195	205	328	4.99895	6.46813	5.0358	3.185	3.59676	4.31648	1.72174	2.22776	1.73443	1.09698	1.2388	1.48668	0.572387	0.0437613	1	+	+	+	-	-	-	Intron (XM_016913181.2/727091, intron 2 of 7)	5302978	5523561	220584	1	727091	#NAME?	72257	GO:0003700::sequence-specific DNA binding transcription factor activity;GO:0005672::transcription factor TFIIA complex;GO:0006355::regulation of transcription, DNA-templated;GO:0006367::transcription initiation from RNA polymerase II promoter;GO:0009878::nodule morphogenesis;GO:0043565::sequence-specific DNA binding;GO:0046872::metal ion binding
NC_037646.1	8759139	8759540	8759243;8759477;8759389;8759327	226	239	236	194	166	171	3.72053	3.8712	3.87495	3.16875	2.91582	2.25664	2.08471	2.16913	2.17123	1.77553	1.63381	1.26445	0.459119	0.0573822	1	+	+	+	-	-	-	Promoter (2-3kb)	8761586	8761672	87	1	732510	NR_031527.1	-2046	.
NC_037642.1	5926838	5927269	5927039;5927201;5927028;5926996	310	291	288	171	189	252	5.09729	4.70996	4.72515	2.795	3.3174	3.31936	2.6578	2.45584	2.46376	1.45735	1.72974	1.73076	0.623674	0.00202663	1	+	+	+	-	-	-	Promoter (1-2kb)	5928306	5928410	105	2	100188940	NM_001134722.1	1141	.
NC_037645.1	7660184	7660582	7660450;7660458;7660461	375	359	444	269	232	268	6.16264	5.8068	7.27575	4.3875	4.06818	3.52928	3.47905	3.27816	4.10744	2.47691	2.29664	1.99241	0.683273	0.0156047	1	+	+	+	-	-	-	Promoter (<=1kb)	7660491	7660511	21	2	100315656	100315656	0	.
NC_037648.1	2050763	2051201	2050888;2051092;2051073	206	221	223	202	140	215	3.39273	3.58086	3.6624	3.29875	2.46186	2.83392	1.74081	1.83734	1.87918	1.69259	1.26318	1.45408	0.307464	0.0947758	1	+	+	+	-	-	-	Distal Intergenic	2058723	2065932	7210	1	100576080	#NAME?	-7522	GO:0005576::extracellular region;GO:0009405::pathogenesis;GO:0019871::sodium channel inhibitor activity
NC_037644.1	114763	115032	114858;114917;114913	261	314	203	111	141	185	4.29418	5.08095	3.3354	1.82	2.47932	2.44032	3.58247	4.23885	2.7826	1.51836	2.0684	2.03587	0.915281	0.0428548	1	+	+	+	-	-	-	Promoter (1-2kb)	113161	119603	6443	1	100576110	#NAME?	1602	GO:0004930::G-protein coupled receptor activity;GO:0007186::G-protein coupled receptor signaling pathway;GO:0016021::integral component of membrane;GO:0046872::metal ion binding
NC_037645.1	9573713	9573953	9573826;9573827;9573807	485	734	708	362	504	614	7.96554	11.8555	11.5922	5.89875	8.8173	8.0688	7.445	11.0808	10.8347	5.51327	8.2411	7.54151	0.463298	0.14181	1	+	+	+	-	-	-	Distal Intergenic	9549757	9554554	4798	2	100576198	#NAME?	-19159	.
NC_037643.1	11314427	11315012	11314602;11314898;11314791;11314903	325	240	305	230	183	230	5.34314	3.88733	5.0031	3.75375	3.21264	3.03072	2.05383	1.49424	1.92313	1.44289	1.2349	1.16497	0.509715	0.0656141	1	+	+	+	-	-	-	Distal Intergenic	11310906	11313905	3000	1	100576253	#NAME?	3521	GO:0030234::enzyme regulator activity;GO:0050790::regulation of catalytic activity
NC_037640.1	591902	592812	592144;592100;592267;592695;592704	482	462	361	298	270	354	7.91637	7.46819	5.9187	4.85875	4.73166	4.6576	1.95738	1.84656	1.46344	1.20136	1.16993	1.15162	0.580314	0.0590189	1	+	+	+	-	-	-	Promoter (2-3kb)	595769	597892	2124	1	100576296	#NAME?	-2957	GO:0004177::aminopeptidase activity;GO:0030145::manganese ion binding
NC_037640.1	588096	588682	588321;588308;588338	636	320	309	177	167	182	10.4404	5.17773	5.0685	2.8925	2.93328	2.40096	4.00632	1.98686	1.94495	1.10995	1.12559	0.921326	1.33031	0.142633	1	+	+	+	-	-	-	Exon (XM_026439735.1/411536, exon 6 of 13)	595769	597892	2124	1	100576296	#NAME?	-7087	GO:0004177::aminopeptidase activity;GO:0030145::manganese ion binding
NC_037640.1	9580730	9581029	9580867;9580866;9580866	337	280	406	157	177	225	5.53982	4.53253	6.65445	2.5675	3.10788	2.96512	4.1595	3.40319	4.9964	1.92777	2.33351	2.22632	0.952975	0.0404618	1	+	+	+	-	-	-	Distal Intergenic	9576248	9579067	2820	1	100576419	#NAME?	4482	GO:0007166::cell surface receptor signaling pathway;GO:0016020::membrane
NC_037649.1	4019909	4020146	4020029;4020022;4020075	197	184	167	160	113	171	3.24522	2.98405	2.7468	2.61625	1.99044	2.25664	3.07138	2.8242	2.59966	2.4761	1.88382	2.13576	0.387175	0.0409263	1	+	+	+	-	-	-	Distal Intergenic	4016651	4017874	1224	1	100576543	#NAME?	3258	.
NC_037642.1	11387672	11387983	11387802;11387808;11387875	236	214	280	170	146	157	3.88443	3.46795	4.59435	2.77875	2.56662	2.07296	2.8044	2.50371	3.31693	2.00614	1.85299	1.49659	0.687449	0.024401	1	+	+	+	-	-	-	5' UTR	11383279	11400558	17280	1	100576683	#NAME?	4393	GO:0004383::guanylate cyclase activity;GO:0006182::cGMP biosynthetic process;GO:0007411::axon guidance;GO:0008270::zinc ion binding;GO:0009190::cyclic nucleotide biosynthetic process;GO:0016849::phosphorus-oxygen lyase activity;GO:0035556::intracellular signal transduction
NC_037645.1	11513098	11513322	11513217;11513230;11513244	163	184	201	137	132	185	2.68796	2.98405	3.3027	2.2425	2.32218	2.44032	2.69096	2.98738	3.30638	2.245	2.32477	2.44304	0.35748	0.0545397	1	+	+	+	-	-	-	Intron (XM_006568522.3/100576746, intron 1 of 6)	11524671	11538924	14254	1	100576746	#NAME?	-11349	GO:0004930::G-protein coupled receptor activity;GO:0007186::G-protein coupled receptor signaling pathway;GO:0016021::integral component of membrane
NC_037639.1	2070072	2070330	2070177;2070195;2070214	208	188	172	156	136	189	3.42551	3.04857	2.82855	2.55125	2.39202	2.4928	2.97915	2.65132	2.45997	2.21881	2.08033	2.16797	0.323098	0.0617825	1	+	+	+	-	-	-	Promoter (<=1kb)	2070113	2073697	3585	1	100576862	#NAME?	0	GO:0004810::tRNA adenylyltransferase activity;GO:0005886::plasma membrane;GO:0016437::tRNA cytidylyltransferase activity
NC_037644.1	767101	767429	767223;767248;767265	287	295	225	112	148	128	4.72032	4.77448	3.6951	1.83625	2.60154	1.69248	3.23178	3.26886	2.52986	1.25719	1.78115	1.15876	1.10541	0.00725288	1	+	+	+	-	-	-	Promoter (<=1kb)	766808	769252	2445	1	100576932	#NAME?	293	.
NC_037640.1	5673714	5674004	5673829;5673828;5673878	252	197	206	217	172	262	4.14667	3.19374	3.38445	3.5425	3.02058	3.45056	3.20976	2.47214	2.61976	2.7421	2.3381	2.67093	0.0989923	0.525633	1	+	+	+	-	-	-	Exon (XM_026439340.1/551828, exon 9 of 16)	5689369	5695371	6003	1	100577047	#NAME?	-15365	GO:0005576::extracellular region;GO:0006952::defense response
NC_037645.1	8091667	8091978	8091821;8091831;8091866	251	277	217	145	92	145	4.13028	4.48414	3.5643	2.3725	1.62378	1.91552	2.98189	3.23736	2.57327	1.71285	1.1723	1.38292	1.04269	0.00429048	1	+	+	+	-	-	-	Distal Intergenic	7989376	8073457	84082	2	100577332	#NAME?	-18210	GO:0003700::sequence-specific DNA binding transcription factor activity;GO:0003743::translation initiation factor activity;GO:0003896::DNA primase activity;GO:0004386::helicase activity;GO:0005739::mitochondrion;GO:0006355::regulation of transcription, DNA-templated;GO:0006413::translational initiation;GO:0008270::zinc ion binding;GO:0012511::monolayer-surrounded lipid storage body;GO:0016021::in…
NC_037643.1	7323356	7324074	7323406;7323707;7323478;7323844;7323719	350	384	359	295	215	361	5.75289	6.21005	5.886	4.81	3.77136	4.74944	1.80229	1.94551	1.84399	1.50689	1.18151	1.48792	0.421075	0.0326005	1	+	+	+	-	-	-	3' UTR	7313313	7314595	1283	1	100577422	#NAME?	10043	.
NC_037649.1	1197286	1197550	1197417;1197439;1197429	186	218	256	86	128	144	3.06493	3.53247	4.20195	1.41375	2.25234	1.9024	2.6052	3.00261	3.57167	1.20169	1.9145	1.61705	0.955586	0.015675	1	+	+	+	-	-	-	Intron (XM_026444364.1/551490, intron 1 of 24)	1166945	1168152	1208	2	100577487	#NAME?	-29134	.
NC_037648.1	10529176	10529739	10529290;10529531;10529360;10529632	292	308	288	218	206	269	4.80227	4.98417	4.72515	3.55875	3.61422	3.5424	1.91794	1.99058	1.88714	1.4213	1.44345	1.41477	0.437524	0.00204604	1	+	+	+	-	-	-	Promoter (1-2kb)	10530837	10531852	1016	1	100577699	#NAME?	-1098	.
NC_037643.1	14737408	14737883	14737524;14737536;14737571	417	440	547	221	281	305	6.85102	7.11333	8.9598	3.6075	4.92372	4.01472	3.24201	3.36614	4.23992	1.70713	2.32998	1.89983	0.869648	0.0175057	1	+	+	+	-	-	-	Promoter (<=1kb)	14735788	14738018	2231	2	100577731	#NAME?	135	.
NC_037648.1	12400627	12401112	12400741;12400741;12400731	253	292	272	240	182	222	4.16306	4.72609	4.46355	3.91625	3.19518	2.92576	1.92949	2.19044	2.06876	1.8151	1.4809	1.35603	0.411776	0.0442664	1	+	+	+	-	-	-	Intron (XM_003250858.4/100577801, intron 1 of 7)	12408725	12414099	5375	1	100577801	#NAME?	-7613	GO:0003677::DNA binding;GO:0003723::RNA binding;GO:0004197::cysteine-type endopeptidase activity;GO:0006355::regulation of transcription, DNA-templated;GO:0006810::transport;GO:0006886::intracellular protein transport;GO:0006888::ER to Golgi vesicle-mediated transport;GO:0008242::omega peptidase activity;GO:0008270::zinc ion binding;GO:0016021::integral component of membrane;GO:0016740::transfera…
NC_037648.1	12245474	12245995	12245653;12245645;12245730	533	592	703	426	339	492	8.75226	9.56509	11.5104	6.93875	5.9364	6.46816	3.77673	4.12748	4.96691	2.99418	2.56165	2.79111	0.62482	0.0386355	1	+	+	+	-	-	-	Intron (XM_003250858.4/100577801, intron 1 of 7)	12238836	12414099	175264	1	100577801	#NAME?	6638	GO:0003677::DNA binding;GO:0003723::RNA binding;GO:0004197::cysteine-type endopeptidase activity;GO:0006355::regulation of transcription, DNA-templated;GO:0006810::transport;GO:0006886::intracellular protein transport;GO:0006888::ER to Golgi vesicle-mediated transport;GO:0008242::omega peptidase activity;GO:0008270::zinc ion binding;GO:0016021::integral component of membrane;GO:0016740::transfera…
NC_037648.1	12392240	12392541	12392392;12392380;12392392	542	620	374	219	180	188	8.89977	10.0167	6.13125	3.575	3.16026	2.47968	6.63802	7.47109	4.57308	2.66646	2.35712	1.8495	1.44263	0.0367805	1	+	+	+	-	-	-	Intron (XM_003250858.4/100577801, intron 1 of 7)	12408725	12414099	5375	1	100577801	#NAME?	-16184	GO:0003677::DNA binding;GO:0003723::RNA binding;GO:0004197::cysteine-type endopeptidase activity;GO:0006355::regulation of transcription, DNA-templated;GO:0006810::transport;GO:0006886::intracellular protein transport;GO:0006888::ER to Golgi vesicle-mediated transport;GO:0008242::omega peptidase activity;GO:0008270::zinc ion binding;GO:0016021::integral component of membrane;GO:0016740::transfera…
NC_037653.1	2831356	2831890	2831538;2831850;2831564	259	319	284	197	193	282	4.2614	5.1616	4.65975	3.2175	3.38724	3.71296	1.79418	2.17319	1.96189	1.35466	1.42613	1.56327	0.448808	0.0224456	1	+	+	+	-	-	-	Promoter (<=1kb)	2826894	2830915	4022	2	100577996	#NAME?	-441	GO:0005515::protein binding
NC_037648.1	15504734	15505045	15504807;15504972;15504971	178	205	189	154	126	195	2.93381	3.32278	3.1065	2.51875	2.21742	2.57152	2.11809	2.39891	2.24276	1.81843	1.60088	1.85653	0.357569	0.0121838	1	+	+	+	-	-	-	Promoter (1-2kb)	15503469	15509304	5836	1	100578159	#NAME?	1265	.
NC_037638.1	10986776	10986993	10986920;10986887;10986891	146	171	149	82	42	175	2.40933	2.77436	2.4525	1.34875	0.75078	2.30912	2.48947	2.86664	2.53407	1.39361	0.775752	2.38592	0.792516	0.133915	1	+	+	+	-	-	-	Promoter (1-2kb)	10988863	10997649	8787	1	100578300	#NAME?	-1870	GO:0016021::integral component of membrane
NC_037643.1	13247392	13247710	13247559;13247572;13247573	190	283	225	92	125	204	3.13049	4.58092	3.6951	1.51125	2.19996	2.6896	2.21049	3.23466	2.60917	1.06712	1.55343	1.89917	0.833531	0.0393683	1	+	+	+	-	-	-	Intron (XM_006562446.3/551973, intron 10 of 10)	13237140	13241412	4273	1	100578602	#NAME?	10252	GO:0005515::protein binding;GO:0008270::zinc ion binding
NC_037642.1	6436498	6436745	6436600;6436610;6436721	261	293	264	159	168	119	4.29418	4.74222	4.33275	2.6	2.95074	1.5744	3.90027	4.30721	3.93531	2.3615	2.68007	1.42998	0.907917	0.0268197	1	+	+	+	-	-	-	Intron (XM_006562116.3/411079, intron 3 of 13)	6373663	6449862	76200	2	100578665	#NAME?	13117	GO:0005739::mitochondrion
NC_037640.1	5607709	5608032	5607882;5607918;5607893	264	203	218	231	189	208	4.34335	3.29052	3.58065	3.77	3.3174	2.74208	3.01958	2.28763	2.48934	2.62097	2.30632	1.90635	0.190181	0.346052	1	+	+	+	-	-	-	Intron (XM_026439340.1/551828, intron 3 of 15)	5629461	5635018	5558	1	100578670	#NAME?	-21429	.
NC_037647.1	11646119	11646860	11646282;11646602;11646271;11646614;11646284;11646585	1310	1328	1686	890	757	1316	21.4873	21.4368	27.5825	14.4787	13.2347	17.279	6.52296	6.50763	8.37329	4.39534	4.01769	5.24543	0.648077	0.032667	1	+	+	+	-	-	-	Promoter (2-3kb)	11643416	11653946	10531	1	100578780	#NAME?	2703	GO:0046983::protein dimerization activity
NC_037638.1	7326280	7326642	7326457;7326457;7326443	642	286	194	119	121	102	10.5388	4.62931	3.18825	1.95	2.13012	1.35136	6.5396	2.87261	1.97839	1.21003	1.32179	0.838554	1.75686	0.194279	1	+	+	+	-	-	-	Intron (XM_026444616.1/113219185, intron 3 of 4)	7234664	7234686	23	1	100629012	100629012	91616	.
NC_037640.1	9968092	9968355	9968215;9968237;9968237	664	527	664	276	307	414	10.8993	8.51664	10.8727	4.50125	5.37768	5.4448	9.29953	7.26659	9.27684	3.84057	4.58836	4.64563	0.983009	0.0146872	1	+	+	+	-	-	-	Intron (XM_006566788.3/724885, intron 1 of 7)	9983658	9988495	4838	2	102653797	#NAME?	20140	GO:0019031::viral envelope
NC_037649.1	7007381	7007713	7007520;7007534;7007523	267	280	244	123	112	142	4.39252	4.53253	4.00575	2.015	1.97298	1.87616	2.97123	3.06594	2.70961	1.363	1.33458	1.26909	1.14082	0.00276897	1	+	+	+	-	-	-	Promoter (2-3kb)	6999089	7004422	5334	2	102653922	#NAME?	-2959	GO:0016021::integral component of membrane;GO:0022857::transmembrane transporter activity;GO:0046983::protein dimerization activity;GO:0055085::transmembrane transport
NC_037644.1	172475	172772	172598;172620;172620	244	257	170	189	156	210	4.01555	4.16154	2.79585	3.0875	2.74122	2.76832	3.03526	3.14561	2.11331	2.33377	2.07202	2.09251	0.352038	0.203626	1	+	+	+	-	-	-	3' UTR	162206	168843	6638	2	102653944	#NAME?	-3632	.
NC_037648.1	3256466	3256997	3256578;3256865;3256597;3256817;3256588	275	335	397	167	242	265	4.52364	5.41968	6.5073	2.73	4.24278	3.48992	1.91533	2.29471	2.75522	1.15589	1.79641	1.47765	0.652887	0.0543922	1	+	+	+	-	-	-	Distal Intergenic	3238207	3244170	5964	2	102653990	#NAME?	-12296	.
NC_037650.1	5895422	5895956	5895529;5895563;5895741;5895610;5895748	252	380	257	172	202	132	4.14667	6.14553	4.2183	2.81125	3.54438	1.74496	1.74587	2.58745	1.77603	1.18362	1.49229	0.73468	0.840998	0.0662514	1	+	+	+	-	-	-	Exon (XM_026444852.1/100578957, exon 5 of 6)	5822981	5903068	80088	2	102654051	#NAME?	7112	GO:0003723::RNA binding;GO:0006396::RNA processing;GO:0008174::mRNA methyltransferase activity;GO:0080009::mRNA methylation
NC_037641.1	5077015	5077338	5077128;5077146;5077146	278	347	178	82	63	63	4.57281	5.61324	2.92665	1.34875	1.11744	0.83968	3.1791	3.90243	2.03466	0.937676	0.776865	0.583761	1.98786	0.0484381	1	+	+	+	-	-	-	Promoter (<=1kb)	5077992	5084745	6754	1	102654156	#NAME?	-654	.
NC_037641.1	5078229	5078824	5078463;5078439;5078445	710	1110	449	127	176	127	11.6533	17.9204	7.3575	2.08	3.09042	1.67936	4.40422	6.7728	2.78068	0.78611	1.16799	0.634693	2.43071	0.0795635	1	+	+	+	-	-	-	Promoter (<=1kb)	5077992	5084745	6754	1	102654156	#NAME?	237	.
NC_037641.1	5083884	5084154	5084030;5084016;5084003	189	264	148	99	73	129	3.1141	4.27445	2.43615	1.625	1.29204	1.7056	2.58839	3.55285	2.02489	1.35067	1.07392	1.41767	1.0877	0.0768428	1	+	+	+	-	-	-	Exon (XR_001702766.2/102654156, exon 3 of 3)	5077992	5084745	6754	1	102654156	#NAME?	5892	.
NC_037641.1	5092917	5093494	5093074;5093379;5093064;5093094	351	619	325	186	176	163	5.76928	10.0006	5.3301	3.03875	3.09042	2.15168	2.24833	3.89731	2.07718	1.18422	1.20436	0.838526	1.34939	0.0974906	1	+	+	+	-	-	-	Intron (XM_006560583.3/413399, intron 2 of 21)	5077992	5084745	6754	1	102654156	#NAME?	14925	.
NC_037653.1	3083374	3083694	3083543;3083489;3083516	185	218	181	165	133	183	3.04854	3.53247	2.9757	2.6975	2.33964	2.41408	2.13921	2.47879	2.0881	1.89288	1.64176	1.694	0.359037	0.0356225	1	+	+	+	-	-	-	3' UTR	3094369	3096270	1902	1	102654221	#NAME?	-10675	.
NC_037643.1	9001819	9002122	9001956;9001947;9001991	191	167	253	154	122	176	3.14688	2.70984	4.1529	2.51875	2.14758	2.32224	2.3317	2.00787	3.07712	1.86629	1.59126	1.72068	0.518318	0.135338	1	+	+	+	-	-	-	Promoter (<=1kb)	9000176	9002298	2123	2	102654387	#NAME?	176	.
NC_037652.1	5169889	5170158	5170043;5170031;5170034	218	251	181	153	167	228	3.58941	4.06476	2.9757	2.5025	2.93328	3.00448	2.99451	3.39108	2.48252	2.08774	2.44713	2.50653	0.332765	0.131949	1	+	+	+	-	-	-	Promoter (<=1kb)	5170992	5172162	1171	1	102654517	#NAME?	-834	.
NC_037640.1	7059889	7060415	7060126;7060232;7060228	366	358	287	298	253	295	6.01513	5.79067	4.7088	4.85875	4.43484	3.88352	2.57099	2.47505	2.01264	2.07673	1.89554	1.6599	0.325708	0.0945164	1	+	+	+	-	-	-	Intron (XM_016911124.2/410044, intron 5 of 11)	7099363	7100664	1302	2	102654622	#NAME?	40249	.
NC_037643.1	9131279	9131942	9131375;9131703;9131522;9131643	357	338	315	252	213	272	5.86762	5.46807	5.1666	4.11125	3.73644	3.58176	1.99049	1.85495	1.75268	1.39467	1.26752	1.21505	0.52991	0.00339992	1	+	+	+	-	-	-	Promoter (2-3kb)	9128940	9133801	4862	1	102654626	#NAME?	2339	GO:0005515::protein binding;GO:0005622::intracellular;GO:0008270::zinc ion binding
NC_037638.1	13175885	13176179	13176029;13176063;13176056	234	220	206	92	103	102	3.85165	3.56473	3.38445	1.51125	1.81584	1.35136	2.94097	2.72189	2.58424	1.15393	1.38651	1.03185	1.20704	0.000448296	1	+	+	+	-	-	-	Distal Intergenic	13201766	13202682	917	1	102654797	#NAME?	-25587	.
NC_037640.1	8867714	8868059	8867858;8867842;8867850	271	208	228	84	72	56	4.45808	3.37117	3.74415	1.38125	1.27458	0.74784	2.90227	2.19468	2.43749	0.899213	0.82977	0.486854	1.76565	0.00377149	1	+	+	+	-	-	-	Intron (XR_003304348.1/102654809, intron 1 of 2)	8854526	8887515	32990	2	102654809	#NAME?	19456	.
NC_037641.1	8392924	8393406	8393183;8393095;8393226	243	563	396	51	96	219	3.99916	9.09732	6.49095	0.845	1.69362	2.8864	1.86504	4.24261	3.02711	0.394072	0.789833	1.3461	1.85223	0.0692885	1	+	+	+	-	-	-	Intron (XM_026440146.1/102654975, intron 1 of 3)	8404340	8475284	70945	1	102654975	#NAME?	-10934	GO:0001104::RNA polymerase II transcription cofactor activity;GO:0004190::aspartic-type endopeptidase activity;GO:0005515::protein binding;GO:0005634::nucleus;GO:0006270::DNA replication initiation;GO:0006357::regulation of transcription from RNA polymerase II promoter;GO:0006367::transcription initiation from RNA polymerase II promoter;GO:0006886::intracellular protein transport;GO:0006888::ER t…
NC_037651.1	10015487	10015906	10015690;10015705;10015702	427	692	757	269	400	345	7.01492	11.1781	12.3933	4.3875	7.00146	4.53952	3.76218	5.99495	6.64667	2.35307	3.75496	2.4346	0.941278	0.0759983	1	+	+	+	-	-	-	Promoter (2-3kb)	10013208	10015759	2552	1	102655815	#NAME?	2279	.
NC_037644.1	13449182	13449595	13449442;13449427;13449431	778	655	501	269	283	450	12.7678	10.5813	8.2077	4.3875	4.95864	5.91712	6.94676	5.75712	4.46568	2.38717	2.69792	3.21941	1.04789	0.0424802	1	+	+	+	-	-	-	Promoter (<=1kb)	13448457	13455453	6997	1	102655858	#NAME?	725	.
NC_037641.1	5455436	5455872	5455550;5455744;5455651;5455771	229	294	279	178	170	189	3.7697	4.75835	4.578	2.90875	2.98566	2.4928	1.94309	2.45268	2.35972	1.49931	1.53895	1.28491	0.64397	0.0197395	1	+	+	+	-	-	-	Promoter (<=1kb)	5456482	5458970	2489	1	102655878	#NAME?	-610	GO:0000276::mitochondrial proton-transporting ATP synthase complex, coupling factor F(o);GO:0005890::sodium:potassium-exchanging ATPase complex;GO:0006813::potassium ion transport;GO:0006814::sodium ion transport;GO:0008948::oxaloacetate decarboxylase activity;GO:0015078::hydrogen ion transmembrane transporter activity;GO:0015081::sodium ion transmembrane transporter activity;GO:0015986::ATP synt…
NC_037647.1	10129518	10130078	10129627;10129663;10129754;10129863	305	399	381	382	366	444	5.01534	6.452	6.2457	6.22375	6.40782	5.8384	2.01374	2.59059	2.50775	2.49894	2.57285	2.34422	-0.0603697	0.640593	1	+	+	+	-	-	-	Promoter (<=1kb)	10127312	10129615	2304	2	102656008	#NAME?	0	GO:0003700::sequence-specific DNA binding transcription factor activity;GO:0005634::nucleus;GO:0006355::regulation of transcription, DNA-templated;GO:0008270::zinc ion binding;GO:0043401::steroid hormone mediated signaling pathway;GO:0043565::sequence-specific DNA binding
NC_037644.1	6765952	6766226	6766087;6766084;6766097	274	208	165	82	136	128	4.50725	3.37117	2.7141	1.34875	2.39202	1.69248	3.69186	2.76131	2.2231	1.10475	1.95929	1.3863	0.963159	0.0605978	1	+	+	+	-	-	-	Distal Intergenic	6750017	6764283	14267	1	102656403	#NAME?	15935	.
NC_037643.1	13839541	13840166	13839741;13839993;13839734;13839984;13839740	475	892	386	137	153	283	7.80164	14.4041	6.32745	2.2425	2.68884	3.72608	2.80723	5.18297	2.27678	0.806909	0.967514	1.34074	1.72063	0.112274	1	+	+	+	-	-	-	Intron (XM_026441174.1/102656661, intron 3 of 5)	13690593	14052771	362179	1	102656661	#NAME?	148948	GO:0003700::sequence-specific DNA binding transcription factor activity;GO:0005515::protein binding;GO:0005634::nucleus;GO:0006355::regulation of transcription, DNA-templated;GO:0008948::oxaloacetate decarboxylase activity;GO:0015081::sodium ion transmembrane transporter activity;GO:0016020::membrane;GO:0019069::viral capsid assembly;GO:0042025::host cell nucleus;GO:0046872::metal ion binding;GO:…
NC_037643.1	11854676	11854943	11854768;11854797;11854799	351	261	290	210	245	304	5.76928	4.22606	4.75785	3.42875	4.29516	4.0016	4.84901	3.55195	3.99892	2.88182	3.61003	3.3633	0.331376	0.142803	1	+	+	+	-	-	-	Exon (XM_026441194.1/411157, exon 23 of 25)	11841882	11849474	7593	2	102656936	#NAME?	-5202	.
NC_037642.1	6694892	6695136	6694989;6695004;6695085	188	217	176	167	130	223	3.09771	3.51634	2.89395	2.73	2.28726	2.93888	2.84801	3.23289	2.66067	2.50994	2.10289	2.70198	0.257073	0.123303	1	+	+	+	-	-	-	Distal Intergenic	6679613	6679691	79	2	104796174	NR_127370.1	-15201	.
NC_037641.1	4680994	4681452	4681132;4681144;4681128	453	388	433	154	210	180	7.44106	6.27457	7.0959	2.51875	3.68406	2.37472	3.65165	3.0792	3.48226	1.23606	1.80793	1.16538	1.27875	0.00186551	1	+	+	+	-	-	-	Intron (XM_016911660.2/411048, intron 2 of 7)	4674014	4674094	81	2	104796176	NR_127372.1	-6900	.
NC_037649.1	9706202	9706818	9706379;9706658;9706402;9706658;9706394;9706646	364	482	430	298	218	289	5.98235	7.79079	7.04685	4.85875	3.82374	3.8048	2.184	2.84422	2.57262	1.77381	1.39595	1.38903	0.737509	0.0158188	1	+	+	+	-	-	-	3' UTR	9713500	9713900	401	1	107963967	#NAME?	-6682	GO:0005515::protein binding;GO:0030414::peptidase inhibitor activity
NC_037639.1	14969815	14970378	14969873;14970175;14970167;14969945;14970171	531	479	558	554	471	679	8.71948	7.7424	9.13965	9.01875	8.24112	8.9216	3.48239	3.09217	3.6502	3.60192	3.29135	3.56312	-0.0323161	0.712657	1	+	+	+	-	-	-	3' UTR	14961455	14964573	3119	1	107964028	#NAME?	8360	GO:0005783::endoplasmic reticulum;GO:0006812::cation transport;GO:0006886::intracellular protein transport;GO:0008324::cation transmembrane transporter activity;GO:0016021::integral component of membrane;GO:0016817::hydrolase activity, acting on acid anhydrides
NC_037640.1	6297814	6298496	6297932;6298341;6298356;6298364	860	562	433	407	341	477	14.1118	9.08119	7.0959	6.63	5.97132	6.27136	4.65402	2.99494	2.3402	2.18655	1.96932	2.06827	0.682489	0.209111	1	+	+	+	-	-	-	Intron (XM_016911268.2/724603, intron 2 of 19)	6319640	6356991	37352	1	107964181	#NAME?	-21144	.
NC_037641.1	5060852	5061297	5061148;5060962;5061199	267	263	313	206	143	252	4.39252	4.25832	5.1339	3.36375	2.51424	3.31936	2.21843	2.15065	2.59286	1.69885	1.26981	1.67643	0.583782	0.0169133	1	+	+	+	-	-	-	Exon (XM_006560583.3/413399, exon 15 of 22)	5055834	5058848	3015	1	107964315	#NAME?	5018	.
NC_037641.1	5062349	5063085	5062653;5062831;5062748;5062953	353	397	298	261	166	309	5.80206	6.41974	4.88865	4.2575	2.91582	4.0672	1.7733	1.96208	1.49413	1.30123	0.891168	1.24307	0.606169	0.0330074	1	+	+	+	-	-	-	Exon (XM_006560583.3/413399, exon 9 of 22)	5055834	5058848	3015	1	107964315	#NAME?	6515	.
NC_037638.1	6251436	6251685	6251560;6251558;6251559	279	242	254	146	208	194	4.5892	3.91959	4.16925	2.38875	3.64914	2.5584	4.13489	3.53156	3.75651	2.15227	3.28789	2.30513	0.560546	0.055659	1	+	+	+	-	-	-	Intron (XM_006563203.3/503505, intron 1 of 3)	6257235	6258825	1591	1	107964344	#NAME?	-5550	.
NC_037642.1	13052799	13053074	13052897;13052909;13052929	238	266	245	178	170	253	3.91721	4.30671	4.0221	2.90875	2.98566	3.33248	3.19694	3.51482	3.28254	2.37391	2.43668	2.71972	0.408397	0.00468461	1	+	+	+	-	-	-	Promoter (<=1kb)	13052098	13055817	3720	1	107964465	#NAME?	701	GO:0006355::regulation of transcription, DNA-templated
NC_037638.1	5567159	5567494	5567325;5567309;5567353	253	251	216	150	125	206	4.16306	4.06476	3.54795	2.45375	2.19996	2.71584	2.79087	2.72497	2.37851	1.64497	1.47483	1.82067	0.676173	0.00447306	1	+	+	+	-	-	-	Promoter (1-2kb)	5568128	5568931	804	2	107964624	#NAME?	1437	.
NC_037644.1	10064016	10064320	10064172;10064172;10064171	584	346	383	149	207	153	9.58815	5.59711	6.2784	2.4375	3.63168	2.02048	7.08111	4.13362	4.63677	1.80016	2.6821	1.49218	1.40775	0.0537378	1	+	+	+	-	-	-	Promoter (2-3kb)	10058425	10061594	3170	2	107964724	#NAME?	-2422	GO:0003700::sequence-specific DNA binding transcription factor activity;GO:0005179::hormone activity;GO:0005576::extracellular region;GO:0006355::regulation of transcription, DNA-templated;GO:0043565::sequence-specific DNA binding
NC_037644.1	10043691	10044024	10043877;10043884;10043884	314	244	187	158	167	182	5.16285	3.95185	3.0738	2.58375	2.93328	2.40096	3.48185	2.66514	2.07298	1.74249	1.97822	1.61922	0.622314	0.135666	1	+	+	+	-	-	-	Intron (XM_006565453.3/725329, intron 3 of 5)	10058425	10061594	3170	2	107964724	#NAME?	17570	GO:0003700::sequence-specific DNA binding transcription factor activity;GO:0005179::hormone activity;GO:0005576::extracellular region;GO:0006355::regulation of transcription, DNA-templated;GO:0043565::sequence-specific DNA binding
NC_037644.1	10482635	10483094	10482742;10482806;10482865	262	237	224	203	225	277	4.31057	3.83894	3.67875	3.315	3.94596	3.64736	2.11078	1.87984	1.80139	1.62328	1.93224	1.78602	0.116809	0.308505	1	+	+	+	-	-	-	Promoter (1-2kb)	10396715	10484817	88103	2	107964726	#NAME?	1723	.
NC_037645.1	4200509	4200908	4200740;4200737;4200712	527	688	294	146	155	434	8.65392	11.1136	4.82325	2.38875	2.72376	5.7072	4.87326	6.25837	2.7161	1.34517	1.53382	3.21388	1.18446	0.112577	1	+	+	+	-	-	-	Promoter (<=1kb)	4198116	4201751	3636	2	107964872	#NAME?	843	.
NC_037647.1	3053524	3053780	3053623;3053642;3053649	608	552	421	175	249	285	9.98151	8.91989	6.8997	2.86	4.365	3.75232	8.74842	7.81795	6.04733	2.50668	3.82576	3.28877	1.23291	0.0175855	1	+	+	+	-	-	-	Intron (XR_001704561.2/107965086, intron 2 of 2)	3046486	3058669	12184	1	107965086	#NAME?	7038	.
NC_037647.1	4979568	4979882	4979714;4979696;4979700	338	268	213	134	155	186	5.55621	4.33897	3.4989	2.19375	2.72376	2.45344	3.97315	3.10272	2.502	1.56871	1.94771	1.75441	0.861673	0.0701453	1	+	+	+	-	-	-	Intron (XR_003305422.1/107965107, intron 4 of 6)	4951729	5005144	53416	1	107965107	#NAME?	27839	.
NC_037649.1	2243206	2243460	2243328;2243322;2243326	182	229	193	129	133	146	2.99937	3.7099	3.1719	2.1125	2.33964	1.92864	2.64945	3.27709	2.80186	1.86605	2.06669	1.70364	0.630949	0.0159476	1	+	+	+	-	-	-	Intron (XM_006559240.3/724242, intron 2 of 3)	2236534	2236964	431	2	107965349	#NAME?	-6242	.
NC_037649.1	9003008	9003335	9003125;9003185;9003143;9003261	217	202	191	224	209	263	3.57302	3.27439	3.1392	3.65625	3.6666	3.46368	2.45374	2.24866	2.15582	2.51089	2.518	2.37865	-0.111164	0.161753	1	+	+	+	-	-	-	Intron (XM_026444488.1/726709, intron 17 of 33)	8962719	8963830	1112	1	107965355	#NAME?	40289	.
NC_037650.1	5746255	5746544	5746394;5746386;5746377	1040	1262	900	433	469	829	17.062	20.3722	14.7314	7.0525	8.2062	10.8896	13.2525	15.8236	11.4423	5.47787	6.37398	8.45825	0.996382	0.0155863	1	+	+	+	-	-	-	Promoter (2-3kb)	5748817	5749677	861	1	107965413	#NAME?	-2273	GO:0000775::chromosome, centromeric region;GO:0003677::DNA binding;GO:0003682::chromatin binding;GO:0005634::nucleus;GO:0006355::regulation of transcription, DNA-templated
NC_037644.1	6245512	6245791	6245656;6245661;6245665	286	224	196	108	128	160	4.70393	3.62925	3.22095	1.77125	2.25234	2.11232	3.78416	2.91961	2.59115	1.42491	1.81193	1.69929	0.913059	0.0442099	1	+	+	+	-	-	-	Exon (XM_026441754.1/724823, exon 6 of 8)	6106099	6110611	4513	1	107965780	#NAME?	139413	GO:0003735::structural constituent of ribosome;GO:0005622::intracellular;GO:0005840::ribosome;GO:0006412::translation
NC_037646.1	532064	532530	532172;532417;532176;532421;532183;532447	312	271	265	195	141	263	5.13007	4.38736	4.3491	3.185	2.47932	3.46368	2.47442	2.11618	2.09773	1.53624	1.19587	1.67066	0.603236	0.0158054	1	+	+	+	-	-	-	Exon (XM_026442759.1/102655120, exon 7 of 7)	514173	521904	7732	1	107965817	#NAME?	17891	.
NC_037639.1	2517266	2517874	2517391;2517762;2517497;2517766;2517448;2517766	379	331	497	197	271	291	6.2282	5.35516	8.1423	3.2175	4.74912	3.83104	2.30362	1.98071	3.01159	1.19006	1.75656	1.41699	0.741573	0.0645616	1	+	+	+	-	-	-	Downstream (<1kb)	2523819	2525895	2077	1	113218604	#NAME?	-5945	.
NC_037640.1	9227704	9228063	9227799;9227844;9227884	209	203	195	164	136	160	3.4419	3.29052	3.2046	2.68125	2.39202	2.11232	2.15359	2.05887	2.00511	1.67765	1.49668	1.32167	0.467707	0.0184894	1	+	+	+	-	-	-	Intron (XM_006563995.3/408740, intron 5 of 14)	9209548	9214475	4928	2	113218633	#NAME?	-13229	.
NC_037640.1	8274114	8274596	8274212;8274457;8274446;8274444	288	295	225	210	186	235	4.73671	4.77448	3.6951	3.42875	3.26502	3.09632	2.209	2.22662	1.72324	1.59902	1.52267	1.44399	0.431831	0.0754706	1	+	+	+	-	-	-	Promoter (1-2kb)	8271567	8272995	1429	2	113218639	#NAME?	-1119	.
NC_037640.1	8275012	8275285	8275139;8275135;8275169	211	190	173	149	121	97	3.47468	3.08083	2.8449	2.4375	2.13012	1.28576	2.85648	2.5327	2.33875	2.00383	1.75114	1.057	0.683454	0.0550613	1	+	+	+	-	-	-	Promoter (2-3kb)	8271567	8272995	1429	2	113218639	#NAME?	-2017	.
NC_037641.1	8631969	8632237	8632088;8632099;8632125	187	192	168	84	69	125	3.08132	3.11309	2.76315	1.38125	1.2222	1.65312	2.58019	2.60679	2.31376	1.15661	1.02343	1.38426	1.07341	0.00078999	1	+	+	+	-	-	-	Distal Intergenic	8636373	8637858	1486	2	113218739	#NAME?	5621	.
NC_037643.1	6811238	6811537	6811333;6811365;6811336	185	198	189	152	163	158	3.04854	3.20987	3.1065	2.48625	2.86344	2.08608	2.28895	2.41009	2.33247	1.86677	2.14997	1.5663	0.332783	0.0974965	1	+	+	+	-	-	-	Intron (XM_026441541.1/412917, intron 3 of 12)	6817943	6822190	4248	2	113218883	#NAME?	10653	GO:0003677::DNA binding;GO:0006355::regulation of transcription, DNA-templated
NC_037644.1	8423310	8423557	8423412;8423435;8423437	486	403	367	151	258	344	7.98193	6.51652	6.0168	2.47	4.52214	4.5264	7.24975	5.91876	5.46488	2.24343	4.10732	4.11119	0.832739	0.0303934	1	+	+	+	-	-	-	Exon (XM_006562560.3/408936, exon 8 of 9)	8427020	8427087	68	2	113218914	#NAME?	3530	.
NC_037646.1	6763004	6763483	6763282;6763303;6763295	646	660	373	163	162	284	10.6043	10.6619	6.1149	2.665	2.84598	3.7392	4.97631	5.00334	2.86956	1.25061	1.33554	1.7547	1.56563	0.0510034	1	+	+	+	-	-	-	Promoter (1-2kb)	6755406	6764653	9248	2	113219019	#NAME?	1170	.
NC_037648.1	14487029	14487309	14487148;14487182;14487169	228	232	233	140	168	164	3.75331	3.75829	3.8259	2.29125	2.95074	2.1648	3.00867	3.01266	3.06686	1.83668	2.36533	1.73531	0.614182	0.0318857	1	+	+	+	-	-	-	Promoter (2-3kb)	14490243	14495252	5010	1	113219098	#NAME?	-2934	GO:0003723::RNA binding;GO:0004252::serine-type endopeptidase activity;GO:0004535::poly(A)-specific ribonuclease activity;GO:0005634::nucleus;GO:0005737::cytoplasm;GO:0005886::plasma membrane;GO:0006402::mRNA catabolic process;GO:0008948::oxaloacetate decarboxylase activity;GO:0015081::sodium ion transmembrane transporter activity;GO:0016020::membrane;GO:0046872::metal ion binding;GO:0071436::sod…
NC_037648.1	13850008	13850595	13850178;13850485;13850164;13850196	590	690	522	608	593	845	9.68649	11.1458	8.55105	9.89625	10.3712	11.0995	3.7107	4.26973	3.27573	3.79105	3.973	4.25199	-0.0942469	0.486356	1	+	+	+	-	-	-	Promoter (<=1kb)	13847425	13849118	1694	2	113219133	#NAME?	-890	GO:0016020::membrane
NC_037649.1	2018158	2018580	2018412;2018409;2018437	311	281	349	207	187	225	5.11368	4.54866	5.7225	3.38	3.28248	2.96512	2.72308	2.4222	3.04728	1.79988	1.74795	1.57895	0.676261	0.0196913	1	+	+	+	-	-	-	Promoter (1-2kb)	2015870	2019742	3873	2	113219149	#NAME?	1162	GO:0003677::DNA binding;GO:0003905::alkylbase DNA N-glycosylase activity;GO:0006284::base-excision repair
NC_037649.1	2016346	2016771	2016471;2016496;2016475	234	283	224	169	162	168	3.85165	4.58092	3.67875	2.7625	2.84598	2.21728	2.03659	2.4222	1.94517	1.46069	1.50483	1.1724	0.630053	0.0168087	1	+	+	+	-	-	-	Promoter (2-3kb)	2015870	2019742	3873	2	113219149	#NAME?	2971	GO:0003677::DNA binding;GO:0003905::alkylbase DNA N-glycosylase activity;GO:0006284::base-excision repair
NC_037649.1	9698198	9698526	9698295;9698346;9698321	235	347	273	308	213	293	3.86804	5.61324	4.4799	5.02125	3.73644	3.85728	2.64827	3.84312	3.06718	3.43781	2.55817	2.6409	0.146284	0.532659	1	+	+	+	-	-	-	Downstream (<1kb)	9688885	9695305	6421	1	113219157	#NAME?	9313	GO:0005515::protein binding;GO:0008289::lipid binding;GO:0016021::integral component of membrane;GO:0034639::L-amino acid efflux transmembrane transporter activity
NC_037651.1	7951579	7951942	7951708;7951770;7951770	272	357	274	264	221	367	4.47447	5.77454	4.49625	4.30625	3.87612	4.82816	2.7689	3.57341	2.78237	2.6648	2.39862	2.98777	0.180572	0.330645	1	+	+	+	-	-	-	Promoter (1-2kb)	7953896	7956506	2611	1	113219242	#NAME?	-1954	GO:0019031::viral envelope
NC_037638.1	1601413	1601751	1601520;1601521;1601529	488	394	446	285	426	451	8.01471	6.37135	7.30845	4.6475	7.45542	5.93024	5.32543	4.23349	4.85615	3.08806	4.95381	3.94039	0.266678	0.279449	1	+	+	+	-	-	-	Intron (XM_006558554.3/100576700, intron 1 of 5)	1591262	1593237	1976	2	113219393	#NAME?	-8176	GO:0005137::interleukin-5 receptor binding;GO:0005576::extracellular region;GO:0006955::immune response;GO:0008083::growth factor activity;GO:0046872::metal ion binding
NC_037638.1	27359498	27359733	27359594;27359620;27359620	215	231	216	220	184	223	3.54024	3.74216	3.54795	3.59125	3.2301	2.93888	3.37899	3.57172	3.38635	3.42768	3.08298	2.80502	0.150093	0.191151	1	+	+	+	-	-	-	Intron (XM_026446307.1/113219412, intron 1 of 4)	27334320	27351870	17551	2	113219412	#NAME?	-7628	GO:0008083::growth factor activity;GO:0008654::phospholipid biosynthetic process;GO:0009878::nodule morphogenesis;GO:0016020::membrane;GO:0016780::phosphotransferase activity, for other substituted phosphate groups;GO:0046872::metal ion binding

## Sheet: unique peaks for 2W
Chromosome	PeakStart	PeakEnd	oriSummitPos	Count_2Q1	Count_2Q2	Count_2Q3	Count_2w1	Count_2w2	Count_2w3	RPM_2Q1	RPM_2Q2	RPM_2Q3	RPM_2w1	RPM_2w2	RPM_2w3	FoldEnrich_2Q1	FoldEnrich_2Q2	FoldEnrich_2Q3	FoldEnrich_2w1	FoldEnrich_2w2	FoldEnrich_2w3	log2foldchange	pvalue	qvalue	In_2Q1	In_2Q2	In_2Q3	In_2w1	In_2w2	In_2w3	annotation	geneStart	geneEnd	geneLength	geneStrand	geneId	transcriptId	distanceToTSS	ClosestTSS_GO
NC_037653.1	3979700	3980088	3979752;3979984;3979950;3979916	240	258	300	381	392	404	3.94999	4.17767	4.92135	6.2075	6.86178	5.3136	2.28725	2.41908	2.84971	3.59446	3.97332	3.07685	-0.494422	0.0368258	1	-	-	-	+	+	+	Intron (XM_016916895.2/406077, intron 2 of 3)	3973855	4037081	63227	1	406077	#NAME?	5845	GO:0003677::DNA binding;GO:0004190::aspartic-type endopeptidase activity;GO:0015743::malate transport;GO:0016021::integral component of membrane
NC_037653.1	4026033	4026280	4026131;4026235;4026133;4026122	258	216	217	247	281	314	4.24501	3.50021	3.5643	4.03	4.92372	4.1328	3.85561	3.17913	3.23735	3.66033	4.47207	3.7537	-0.210544	0.186142	1	-	-	-	+	+	+	Intron (XM_016916895.2/406077, intron 3 of 3)	4015721	4032442	16722	1	406077	NM_001011571.1	10312	GO:0003677::DNA binding;GO:0004190::aspartic-type endopeptidase activity;GO:0015743::malate transport;GO:0016021::integral component of membrane
NC_037650.1	10176647	10176902	10176758;10176757;10176766	196	260	186	273	233	331	3.22883	4.20993	3.05745	4.4525	4.08564	4.35584	2.841	3.70426	2.69021	3.91769	3.5949	3.83264	-0.296829	0.146788	1	-	-	-	+	+	+	Intron (XM_026444521.1/406092, intron 1 of 9)	10108143	10187350	79208	2	406092	NM_001011581.1	10448	GO:0004672::protein kinase activity;GO:0005524::ATP binding;GO:0006468::protein phosphorylation
NC_037650.1	10122767	10122992	10122878;10122880;10122881	380	450	388	584	535	723	6.24459	7.27463	6.36015	9.50625	9.35856	9.49888	6.22389	7.25052	6.33907	9.47474	9.32754	9.46739	-0.512773	0.0116595	1	-	-	-	+	+	+	Intron (XM_026444523.1/406092, intron 1 of 8)	10107902	10137661	29760	2	406092	#NAME?	14669	GO:0004672::protein kinase activity;GO:0005524::ATP binding;GO:0006468::protein phosphorylation
NC_037645.1	7415188	7415450	7415307;7415306;7415324	121	121	83	175	179	232	1.99958	1.96786	1.3734	2.86	3.1428	3.05696	1.71257	1.68541	1.17627	2.4495	2.69171	2.61819	-0.762406	0.015233	1	-	-	-	+	+	+	Distal Intergenic	7426943	7561836	134894	1	406104	NM_001040230.1	-11493	GO:0004252::serine-type endopeptidase activity;GO:0005886::plasma membrane;GO:0006355::regulation of transcription, DNA-templated;GO:0008152::metabolic process;GO:0016787::hydrolase activity;GO:0019048::modulation by virus of host morphology or physiology;GO:0043401::steroid hormone mediated signaling pathway
NC_037647.1	11212775	11213012	11212883;11212872;11212899	152	125	108	149	142	181	2.50767	2.03238	1.78215	2.4375	2.49678	2.38784	2.37334	1.92351	1.68668	2.30693	2.36303	2.25993	-0.211835	0.256268	1	-	-	-	+	+	+	Promoter (2-3kb)	11108360	11210337	101978	2	408278	#NAME?	-2438	GO:0004672::protein kinase activity;GO:0005524::ATP binding;GO:0006468::protein phosphorylation
NC_037647.1	11117250	11117493	11117356;11117363;11117355	905	949	967	1131	952	1652	14.8493	15.3235	15.8268	18.395	16.6394	21.6874	13.7083	14.146	14.6107	16.9815	15.3608	20.0209	-0.302282	0.13245	1	-	-	-	+	+	+	Intron (XM_006569194.3/408278, intron 4 of 7)	11108360	11142437	34078	2	408278	#NAME?	24944	GO:0004672::protein kinase activity;GO:0005524::ATP binding;GO:0006468::protein phosphorylation
NC_037647.1	10213361	10213794	10213447;10213688;10213431;10213685;10213692	586	864	808	704	727	942	9.62093	13.9524	13.2271	11.4563	12.7109	12.3722	4.99337	7.24145	6.86501	5.94595	6.5971	6.42131	0.0102697	0.955116	1	-	-	-	+	+	+	Promoter (<=1kb)	10211681	10213727	2047	2	408284	#NAME?	0	GO:0005741::mitochondrial outer membrane;GO:0055085::transmembrane transport
NC_037648.1	14390593	14391447	14390704;14390700;14391023;14391315;14390730;14391314	260	295	329	436	341	535	4.27779	4.77448	5.3955	7.10125	5.97132	7.03232	1.12699	1.25784	1.42145	1.87083	1.57315	1.85267	-0.4767	0.0186119	1	-	-	-	+	+	+	Intron (XM_016915004.2/551073, intron 14 of 14)	14399987	14404363	4377	1	408317	#NAME?	-8540	.
NC_037651.1	6961716	6962145	6961829;6962049;6961895;6962096;6962039	197	165	197	268	211	229	3.24522	2.67758	3.2373	4.37125	3.70152	3.0176	1.69997	1.40262	1.69582	2.28983	1.939	1.58074	-0.275872	0.238186	1	-	-	-	+	+	+	Distal Intergenic	6978746	7173933	195188	1	408455	#NAME?	-16601	GO:0005634::nucleus;GO:0046872::metal ion binding
NC_037651.1	7198544	7198774	7198658;7198647;7198648	225	319	381	501	445	629	3.70414	5.1616	6.2457	8.1575	7.78716	8.2656	3.61195	5.03314	6.09026	7.95448	7.59335	8.05989	-0.679977	0.0494762	1	-	-	-	+	+	+	Promoter (<=1kb)	7199600	7207215	7616	1	408456	#NAME?	-826	GO:0016021::integral component of membrane;GO:0022857::transmembrane transporter activity;GO:0055085::transmembrane transport
NC_037651.1	8713475	8713697	8713590;8713590;8713590	508	829	869	1232	889	1434	8.34251	13.3879	14.2245	20.0362	15.5394	18.8272	8.42672	13.523	14.3681	20.2384	15.6962	19.0172	-0.597492	0.0593371	1	-	-	-	+	+	+	Promoter (1-2kb)	8711959	8731942	19984	1	408470	#NAME?	1516	GO:0003700::sequence-specific DNA binding transcription factor activity;GO:0003951::NAD+ kinase activity;GO:0004871::signal transducer activity;GO:0006355::regulation of transcription, DNA-templated;GO:0006741::NADP biosynthetic process;GO:0007165::signal transduction;GO:0008152::metabolic process;GO:0016301::kinase activity
NC_037652.1	7756360	7756811	7756463;7756478;7756793;7756475;7756788	212	233	212	282	244	382	3.49107	3.77442	3.48255	4.59875	4.2777	5.02496	1.73975	1.88095	1.7355	2.29175	2.13176	2.50415	-0.371158	0.025318	1	-	-	-	+	+	+	Promoter (<=1kb)	7753236	7756505	3270	2	408511	#NAME?	0	GO:0003723::RNA binding;GO:0003735::structural constituent of ribosome;GO:0005622::intracellular;GO:0005840::ribosome;GO:0006412::translation;GO:0006810::transport;GO:0042254::ribosome biogenesis
NC_037653.1	6529337	6529629	6529455;6529500;6529509	173	189	184	196	200	204	2.85186	3.0647	3.02475	3.20125	3.50946	2.6896	2.19244	2.35606	2.32535	2.46104	2.69798	2.0677	-0.0722221	0.592703	1	-	-	-	+	+	+	Intron (XM_006563151.3/408562, intron 1 of 2)	6456567	6607687	151121	1	408562	#NAME?	72770	GO:0000398::mRNA splicing, via spliceosome;GO:0004190::aspartic-type endopeptidase activity;GO:0005634::nucleus;GO:0005681::spliceosomal complex;GO:0006270::DNA replication initiation;GO:0006629::lipid metabolic process;GO:0007411::axon guidance;GO:0008083::growth factor activity;GO:0008270::zinc ion binding;GO:0009297::pilus assembly;GO:0016020::membrane;GO:0016021::integral component of membran…
NC_037638.1	17591843	17592083	17592019;17591964;17591971	173	129	137	159	157	199	2.85186	2.0969	2.2563	2.6	2.75868	2.624	2.66549	1.95987	2.10885	2.43009	2.5784	2.45252	-0.147863	0.376604	1	-	-	-	+	+	+	Exon (XR_001705209.2/724991, exon 17 of 20)	17555982	17577111	21130	2	408583	#NAME?	-14732	GO:0005185::neurohypophyseal hormone activity;GO:0005576::extracellular region;GO:0007155::cell adhesion;GO:0007165::signal transduction;GO:0016021::integral component of membrane;GO:0016485::protein processing
NC_037638.1	6999382	6999650	6999575;6999554;6999560	144	237	185	292	254	331	2.37655	3.83894	3.0411	4.76125	4.4523	4.35584	1.99004	3.21459	2.54651	3.9869	3.7282	3.64742	-0.551803	0.0668282	1	-	-	-	+	+	+	Promoter (<=1kb)	6995791	6999382	3592	2	408609	#NAME?	0	GO:0009522::photosystem I;GO:0009538::photosystem I reaction center;GO:0015979::photosynthesis
NC_037638.1	23340756	23341050	23340960;23340935;23340951	198	119	161	200	187	235	3.26161	1.9356	2.6487	3.26625	3.28248	3.09632	2.49044	1.47795	2.02245	2.49399	2.50638	2.36423	-0.297848	0.256415	1	-	-	-	+	+	+	Promoter (2-3kb)	23319490	23343644	24155	2	408646	#NAME?	2594	GO:0016021::integral component of membrane;GO:0055085::transmembrane transport
NC_037639.1	15010713	15011239	15010820;15011163;15010828;15010826;15011135	484	456	503	555	528	771	7.94915	7.37141	8.2404	9.035	9.23634	10.1286	3.39763	3.1507	3.52212	3.86175	3.94781	4.32918	-0.26949	0.0213	1	-	-	-	+	+	+	Intron (XM_026439095.1/408661, intron 1 of 8)	14966833	15039135	72303	2	408661	#NAME?	27896	GO:0003677::DNA binding;GO:0004564::beta-fructofuranosidase activity;GO:0004575::sucrose alpha-glucosidase activity;GO:0005664::nuclear origin of replication recognition complex;GO:0006260::DNA replication;GO:0006629::lipid metabolic process;GO:0009236::cobalamin biosynthetic process;GO:0016012::sarcoglycan complex;GO:0016021::integral component of membrane;GO:0046872::metal ion binding;GO:004847…
NC_037639.1	14635329	14636067	14635417;14635687;14635430;14635706;14635397;14635697	870	765	953	1086	1228	1492	14.2757	12.3556	15.5979	17.6638	21.4583	19.5882	4.3513	3.76605	4.75432	5.38401	6.5406	5.97058	-0.475373	0.0198399	1	-	-	-	+	+	+	Exon (XM_016910882.2/725893, exon 7 of 11)	14641367	14642910	1544	2	408675	#NAME?	6843	.
NC_037639.1	14720105	14720390	14720243;14720238;14720254	591	679	600	761	752	979	9.70288	10.9684	9.82635	12.3825	13.1474	12.8576	7.6419	8.63861	7.73914	9.75234	10.3548	10.1265	-0.331939	0.00955697	1	-	-	-	+	+	+	Promoter (1-2kb)	14687041	14722203	35163	2	408677	#NAME?	1813	GO:0005634::nucleus;GO:0045893::positive regulation of transcription, DNA-templated;GO:0050765::negative regulation of phagocytosis
NC_037639.1	12252032	12252402	12252113;12252194;12252206	182	176	159	240	186	248	2.99937	2.85501	2.616	3.91625	3.26502	3.26688	1.82105	1.73341	1.58829	2.37773	1.98234	1.98347	-0.302749	0.0737694	1	-	-	-	+	+	+	Promoter (2-3kb)	12254410	12295235	40826	1	408685	#NAME?	-2008	GO:0000226::microtubule cytoskeleton organization;GO:0015630::microtubule cytoskeleton;GO:0016567::protein ubiquitination;GO:0016586::RSC complex;GO:0043044::ATP-dependent chromatin remodeling;GO:0090263::positive regulation of canonical Wnt signaling pathway
NC_037639.1	8665226	8665482	8665335;8665343;8665336	58	89	97	242	160	231	0.96701	1.4517	1.6023	3.94875	2.81106	3.04384	0.847548	1.27236	1.40436	3.46093	2.46379	2.66781	-1.28576	0.015201	1	-	-	-	+	+	+	Distal Intergenic	8658617	8660460	1844	1	408702	#NAME?	6609	.
NC_037639.1	8554347	8554659	8554495;8554494;8554508	106	109	131	248	159	210	1.75373	1.7743	2.1582	4.04625	2.7936	2.76832	1.26207	1.27688	1.55315	2.91189	2.01042	1.99223	-0.756789	0.0791006	1	-	-	-	+	+	+	Distal Intergenic	8658617	8660460	1844	1	408702	#NAME?	-103958	.
NC_037639.1	5955620	5956025	5955682;5955678;5955929;5955929	201	201	228	227	237	267	3.31078	3.25826	3.74415	3.705	4.15548	3.51616	1.83684	1.8077	2.07727	2.05555	2.30548	1.95078	-0.141584	0.223229	1	-	-	-	+	+	+	3' UTR	5860584	5964574	103991	2	408710	#NAME?	8549	GO:0003723::RNA binding
NC_037639.1	5964279	5964665	5964545;5964540;5964551	177	189	168	289	246	293	2.91742	3.0647	2.76315	4.7125	4.31262	3.85728	1.69807	1.78379	1.60827	2.74288	2.51013	2.24511	-0.558827	0.021008	1	-	-	-	+	+	+	Promoter (<=1kb)	5860584	5964574	103991	2	408710	#NAME?	0	GO:0003723::RNA binding
NC_037640.1	2599137	2599409	2599244;2599239;2599248	728	804	773	1099	1089	1233	11.9483	12.9846	12.6549	17.875	19.0314	16.1901	9.85848	10.7135	10.4415	14.7486	15.7027	13.3584	-0.498352	0.0154233	1	-	-	-	+	+	+	Intron (XM_006557974.3/408763, intron 3 of 8)	2546251	2602840	56590	2	408763	#NAME?	3431	GO:0003677::DNA binding;GO:0003700::sequence-specific DNA binding transcription factor activity;GO:0004252::serine-type endopeptidase activity;GO:0005634::nucleus;GO:0005886::plasma membrane;GO:0006355::regulation of transcription, DNA-templated;GO:0007165::signal transduction;GO:0016237::microautophagy;GO:0016579::protein deubiquitination;GO:0034448::EGO complex;GO:0036459::ubiquitinyl hydrolase…
NC_037641.1	13377064	13377432	13377128;13377270;13377174;13377419	195	192	142	264	254	262	3.21244	3.11309	2.33805	4.30625	4.4523	3.45056	1.96099	1.90034	1.42723	2.62869	2.71784	2.10635	-0.494923	0.0480073	1	-	-	-	+	+	+	Intron (XM_026440137.1/408767, intron 1 of 16)	13208748	13383986	175239	2	408767	#NAME?	6554	GO:0005509::calcium ion binding;GO:0006629::lipid metabolic process;GO:0007156::homophilic cell adhesion via plasma membrane adhesion molecules;GO:0016020::membrane
NC_037642.1	1079904	1080384	1080087;1080141;1080073	151	178	121	352	389	744	2.49128	2.88727	1.9947	5.73625	6.8094	9.7744	1.16666	1.3521	0.934112	2.68627	3.18882	4.57732	-1.59797	0.0485633	1	-	-	-	+	+	+	Intron (XM_026440819.1/408822, intron 1 of 18)	1052064	1750482	698419	1	408822	#NAME?	27840	GO:0003779::actin binding;GO:0005246::calcium channel regulator activity;GO:0005525::GTP binding;GO:0005576::extracellular region;GO:0005739::mitochondrion;GO:0006816::calcium ion transport;GO:0007010::cytoskeleton organization;GO:0016020::membrane;GO:0016614::oxidoreductase activity, acting on CH-OH group of donors;GO:0042030::ATPase inhibitor activity;GO:0042381::hemolymph coagulation;GO:004687…
NC_037642.1	8882163	8882446	8882302;8882306;8882304	774	972	919	1359	1053	1636	12.7022	15.6945	15.042	22.1	18.4028	21.4774	10.0746	12.4479	11.9304	17.5283	14.5959	17.0345	-0.512826	0.0148098	1	-	-	-	+	+	+	Promoter (<=1kb)	8845347	8881524	36178	2	408836	#NAME?	-639	.
NC_037642.1	11829664	11830053	11829930;11829874;11829878	186	165	184	214	205	225	3.06493	2.67758	3.02475	3.49375	3.59676	2.96512	1.7702	1.54648	1.74699	2.01787	2.07737	1.71255	-0.197806	0.149972	1	-	-	-	+	+	+	Promoter (<=1kb)	11829964	11933110	103147	1	408857	#NAME?	0	GO:0005515::protein binding
NC_037642.1	12440648	12440932	12440763;12440756;12440762	435	454	470	561	544	698	7.14604	7.33915	7.70085	9.1325	9.5157	9.17088	5.6479	5.80053	6.0864	7.21791	7.52077	7.24824	-0.326423	0.00108317	1	-	-	-	+	+	+	Intron (XM_016912182.2/408862, intron 3 of 11)	12412395	12557089	144695	1	408862	#NAME?	28253	GO:0004656::procollagen-proline 4-dioxygenase activity;GO:0005783::endoplasmic reticulum;GO:0016491::oxidoreductase activity;GO:0016702::oxidoreductase activity, acting on single donors with incorporation of molecular oxygen, incorporation of two atoms of oxygen;GO:0048309::endoplasmic reticulum inheritance;GO:0051028::mRNA transport;GO:0051321::meiotic cell cycle;GO:0055114::oxidation-reduction …
NC_037642.1	12903622	12903906	12903760;12903780;12903763	528	625	564	616	792	840	8.67031	10.0974	9.23775	10.0263	13.8458	11.0339	6.85261	7.98052	7.30109	7.92433	10.9431	8.72069	-0.317767	0.172218	1	-	-	-	+	+	+	Promoter (2-3kb)	12780641	12906279	125639	2	408865	#NAME?	2373	GO:0005216::ion channel activity;GO:0005515::protein binding;GO:0005789::endoplasmic reticulum membrane;GO:0006811::ion transport;GO:0016020::membrane;GO:0055085::transmembrane transport
NC_037642.1	12870213	12870455	12870321;12870340;12870330	145	160	154	238	276	263	2.39294	2.59693	2.53425	3.88375	4.83642	3.46368	2.21816	2.40725	2.34914	3.60007	4.48316	3.21069	-0.695375	0.0591485	1	-	-	-	+	+	+	Intron (XM_026440916.1/408865, intron 3 of 16)	12780641	12906279	125639	2	408865	#NAME?	35824	GO:0005216::ion channel activity;GO:0005515::protein binding;GO:0005789::endoplasmic reticulum membrane;GO:0006811::ion transport;GO:0016020::membrane;GO:0055085::transmembrane transport
NC_037643.1	9570195	9570477	9570349;9570324;9570376	162	121	140	178	224	202	2.67157	1.96786	2.30535	2.90875	3.9285	2.66336	2.12641	1.5663	1.83492	2.31519	3.12685	2.11987	-0.452091	0.145896	1	-	-	-	+	+	+	Intron (XM_016912656.2/408884, intron 1 of 8)	9582023	9667691	85669	1	408884	#NAME?	-11546	GO:0000150::recombinase activity;GO:0003677::DNA binding;GO:0003700::sequence-specific DNA binding transcription factor activity;GO:0006310::DNA recombination;GO:0006355::regulation of transcription, DNA-templated;GO:0006812::cation transport;GO:0008324::cation transmembrane transporter activity;GO:0016020::membrane
NC_037644.1	14022509	14022924	14022777;14022759;14022809	195	174	199	324	254	293	3.21244	2.82275	3.27	5.28125	4.4523	3.85728	1.73943	1.52843	1.7706	2.85963	2.41078	2.0886	-0.546526	0.0618449	1	-	-	-	+	+	+	Intron (XM_026441639.1/408897, intron 1 of 13)	14016898	14184932	168035	1	408897	#NAME?	5611	GO:0000746::conjugation;GO:0007411::axon guidance;GO:0016021::integral component of membrane;GO:0019087::transformation of host cell by virus
NC_037646.1	8570418	8571015	8570586;8570569;8570591	134	175	164	522	328	448	2.21265	2.83888	2.69775	8.49875	5.74434	5.89088	0.833447	1.06933	1.01617	3.20126	2.16374	2.21894	-1.3775	0.0388939	1	-	-	-	+	+	+	Exon (XM_006561508.3/409012, exon 2 of 20)	8554163	8606318	52156	1	409012	NM_001256039.1	16255	GO:0001104::RNA polymerase II transcription cofactor activity;GO:0003700::sequence-specific DNA binding transcription factor activity;GO:0005737::cytoplasm;GO:0006355::regulation of transcription, DNA-templated;GO:0006357::regulation of transcription from RNA polymerase II promoter;GO:0007275::multicellular organismal development;GO:0008092::cytoskeletal protein binding;GO:0016592::mediator compl…
NC_037646.1	8571384	8571717	8571479;8571530;8571517	169	148	129	197	196	219	2.7863	2.40337	2.1255	3.2175	3.43962	2.8864	1.87909	1.62084	1.43345	2.16989	2.31969	1.9466	-0.38363	0.042691	1	-	-	-	+	+	+	Intron (XM_006561508.3/409012, intron 2 of 19)	8554163	8606318	52156	1	409012	NM_001256039.1	17221	GO:0001104::RNA polymerase II transcription cofactor activity;GO:0003700::sequence-specific DNA binding transcription factor activity;GO:0005737::cytoplasm;GO:0006355::regulation of transcription, DNA-templated;GO:0006357::regulation of transcription from RNA polymerase II promoter;GO:0007275::multicellular organismal development;GO:0008092::cytoskeletal protein binding;GO:0016592::mediator compl…
NC_037646.1	5448714	5449031	5448858;5448883;5448872	173	140	169	175	200	226	2.85186	2.27433	2.7795	2.86	3.50946	2.97824	2.02008	1.61099	1.96882	2.02584	2.48588	2.10959	-0.24172	0.150249	1	-	-	-	+	+	+	Intron (XM_026442658.1/409024, intron 1 of 10)	5237639	5460938	223300	2	409024	#NAME?	11907	GO:0005523::tropomyosin binding;GO:0009401::phosphoenolpyruvate-dependent sugar phosphotransferase system;GO:0051694::pointed-end actin filament capping
NC_037638.1	12220516	12220785	12220617;12220631;12220627	128	130	134	182	171	222	2.11431	2.11303	2.20725	2.97375	3.00312	2.92576	1.76389	1.76282	1.84143	2.48089	2.50539	2.44085	-0.468383	5.83209e-05	1	-	-	-	+	+	+	5' UTR	12205901	12225726	19826	2	409109	#NAME?	4941	GO:0003824::catalytic activity;GO:0006629::lipid metabolic process;GO:0008152::metabolic process
NC_037650.1	7367767	7368137	7367945;7367965;7367952	112	121	155	418	277	478	1.85207	1.96786	2.5506	6.80875	4.85388	6.28448	1.12448	1.19478	1.54858	4.1339	2.94701	3.81559	-1.49427	0.0136025	1	-	-	-	+	+	+	Distal Intergenic	7375352	7381521	6170	2	409230	#NAME?	13384	GO:0005096::GTPase activator activity;GO:0005515::protein binding;GO:0005737::cytoplasm
NC_037638.1	15098479	15098719	15098580;15098583;15098584	714	595	663	642	752	863	11.7188	9.61348	10.8564	10.4488	13.1474	11.3357	10.953	8.98525	10.1469	9.76598	12.2882	10.5949	-0.117992	0.416237	1	-	-	-	+	+	+	Promoter (<=1kb)	15090601	15097846	7246	2	409282	#NAME?	-633	GO:0008270::zinc ion binding;GO:0046872::metal ion binding
NC_037648.1	2433086	2433306	2433197;2433197;2433204	124	131	153	168	178	230	2.04875	2.12916	2.5179	2.74625	3.12534	3.03072	2.08816	2.17011	2.56633	2.79907	3.18546	3.08902	-0.410921	0.0180613	1	-	-	-	+	+	+	Promoter (<=1kb)	2415907	2433218	17312	2	409348	#NAME?	0	GO:0005515::protein binding;GO:0006810::transport;GO:0043190::ATP-binding cassette (ABC) transporter complex
NC_037638.1	5620176	5620384	5620277;5620281;5620291	36	99	128	154	160	257	0.60643	1.613	2.10915	2.51875	2.81106	3.38496	0.653583	1.73842	2.27315	2.7146	3.02964	3.64816	-1.00957	0.0596195	1	-	-	-	+	+	+	Promoter (<=1kb)	5492939	5619806	126868	2	409383	#NAME?	-370	GO:0004222::metalloendopeptidase activity;GO:0006508::proteolysis;GO:0008270::zinc ion binding;GO:0031012::extracellular matrix
NC_037646.1	7032632	7032919	7032795;7032793;7032801	154	152	161	202	180	282	2.54045	2.46789	2.6487	3.29875	3.16026	3.71296	1.98694	1.93019	2.0716	2.58002	2.47171	2.90398	-0.40974	0.0280246	1	-	-	-	+	+	+	Promoter (<=1kb)	7031549	7032663	1115	2	409599	#NAME?	0	GO:0003735::structural constituent of ribosome;GO:0005622::intracellular;GO:0005840::ribosome;GO:0006412::translation
NC_037642.1	11041928	11042139	11042021;11042029;11042040	82	109	128	167	190	220	1.36037	1.7743	2.10915	2.73	3.33486	2.89952	1.4454	1.8852	2.24098	2.90064	3.5433	3.08075	-0.773586	0.012546	1	-	-	-	+	+	+	Intron (XM_026440829.1/726101, intron 2 of 8)	10999733	11014082	14350	1	409686	#NAME?	42195	GO:0005515::protein binding;GO:0005524::ATP binding;GO:0005634::nucleus;GO:0006355::regulation of transcription, DNA-templated
NC_037638.1	3683010	3683339	3683108;3683124;3683146	228	335	258	308	227	480	3.75331	5.41968	4.23465	5.02125	3.98088	6.31072	2.56193	3.69936	2.89048	3.4274	2.71726	4.30756	-0.191688	0.493387	1	-	-	-	+	+	+	Promoter (<=1kb)	3291485	3682271	390787	2	409780	#NAME?	-739	GO:0003676::nucleic acid binding;GO:0003723::RNA binding;GO:0004535::poly(A)-specific ribonuclease activity;GO:0005634::nucleus;GO:0005737::cytoplasm;GO:0006402::mRNA catabolic process;GO:0016021::integral component of membrane;GO:0046872::metal ion binding
NC_037645.1	12574190	12574780	12574293;12574638;12574621;12574632	145	188	205	380	280	306	2.39294	3.04857	3.3681	6.19125	4.90626	4.02784	0.912034	1.16192	1.2837	2.3597	1.86995	1.53515	-0.779818	0.0606966	1	-	-	-	+	+	+	Exon (XM_016913423.2/409843, exon 14 of 26)	12558255	12590975	32721	2	409843	#NAME?	16195	GO:0003774::motor activity;GO:0005515::protein binding;GO:0005524::ATP binding;GO:0005737::cytoplasm;GO:0008092::cytoskeletal protein binding;GO:0016020::membrane;GO:0016459::myosin complex;GO:0019898::extrinsic component of membrane;GO:0048193::Golgi vesicle transport
NC_037638.1	16701544	16701943	16701654;16701843;16701640;16701882	149	135	174	255	185	218	2.4585	2.19368	2.86125	4.16	3.24756	2.87328	1.38445	1.23532	1.61125	2.34261	1.82879	1.61802	-0.452415	0.121424	1	-	-	-	+	+	+	Intron (XM_026439838.1/409970, intron 2 of 13)	16691313	16712184	20872	2	409970	#NAME?	10241	GO:0004222::metalloendopeptidase activity;GO:0008233::peptidase activity;GO:0031012::extracellular matrix
NC_037640.1	6998613	6998912	6998720;6998730;6998760	157	157	196	223	249	254	2.58962	2.54854	3.22095	3.64	4.365	3.3456	1.94438	1.91354	2.41841	2.73304	3.2774	2.512	-0.441347	0.0615851	1	-	-	-	+	+	+	Intron (XM_016911124.2/410044, intron 5 of 11)	7005875	7099161	93287	1	410044	#NAME?	-6963	GO:0003735::structural constituent of ribosome;GO:0005089::Rho guanyl-nucleotide exchange factor activity;GO:0005622::intracellular;GO:0005840::ribosome;GO:0006412::translation;GO:0007165::signal transduction;GO:0035023::regulation of Rho protein signal transduction
NC_037640.1	12204415	12204655	12204527;12204536;12204539	368	421	357	515	520	687	6.04791	6.80686	5.8533	8.385	9.09666	9.02656	5.65268	6.36204	5.47079	7.83705	8.5022	8.43668	-0.502779	0.00264591	1	-	-	-	+	+	+	Promoter (1-2kb)	12203358	12209166	5809	1	410065	NM_001172379.1	1057	GO:0005576::extracellular region;GO:0006030::chitin metabolic process;GO:0008061::chitin binding;GO:0016670::oxidoreductase activity, acting on a sulfur group of donors, oxygen as acceptor;GO:0030328::prenylcysteine catabolic process;GO:0055114::oxidation-reduction process
NC_037649.1	8113506	8113729	8113608;8113607;8113611	376	501	419	443	478	718	6.17903	8.09726	6.867	7.215	8.36334	9.43328	6.21354	8.14248	6.90535	7.25529	8.41004	9.48596	-0.242399	0.205713	1	-	-	-	+	+	+	Promoter (<=1kb)	8107561	8114589	7029	2	410167	#NAME?	860	GO:0008641::small protein activating enzyme activity;GO:0008677::2-dehydropantoate 2-reductase activity;GO:0016491::oxidoreductase activity;GO:0055114::oxidation-reduction process;GO:0071949::FAD binding
NC_037647.1	7673881	7674158	7674012;7674023;7674039	379	332	270	305	245	356	6.2282	5.37129	4.43085	4.9725	4.29516	4.68384	5.04643	4.35211	3.59012	4.02899	3.48017	3.7951	0.200385	0.313756	1	-	-	-	+	+	+	Intron (XM_006564478.3/410222, intron 1 of 2)	7677418	7688077	10660	1	410222	#NAME?	-3260	GO:0004190::aspartic-type endopeptidase activity;GO:0005634::nucleus;GO:0006914::autophagy;GO:0008855::exodeoxyribonuclease VII activity;GO:0015078::hydrogen ion transmembrane transporter activity;GO:0015991::ATP hydrolysis coupled proton transport;GO:0016021::integral component of membrane;GO:0033179::proton-transporting V-type ATPase, V0 domain;GO:0046872::metal ion binding;GO:0055085::transmem…
NC_037647.1	6240436	6240744	6240585;6240570;6240614	154	167	170	194	171	331	2.54045	2.70984	2.79585	3.16875	3.00312	4.35584	1.8519	1.97538	2.03808	2.30992	2.18918	3.17526	-0.387823	0.188498	1	-	-	-	+	+	+	Intron (XR_003305419.1/107965062, intron 1 of 2)	6223652	6228440	4789	2	410235	#NAME?	-11996	GO:0004673::protein histidine kinase activity;GO:0005515::protein binding;GO:0007165::signal transduction
NC_037648.1	10235067	10235374	10235228;10235211;10235260	349	317	374	250	686	516	5.7365	5.12934	6.13125	4.07875	11.995	6.78304	4.1953	3.75126	4.48399	2.98293	8.77235	4.96067	-0.427335	0.489596	1	-	-	-	+	+	+	Intron (XM_006564318.3/410309, intron 1 of 4)	10210607	10231041	20435	2	410309	#NAME?	-4026	GO:0003677::DNA binding;GO:0003700::sequence-specific DNA binding transcription factor activity;GO:0003743::translation initiation factor activity;GO:0005215::transporter activity;GO:0005219::ryanodine-sensitive calcium-release channel activity;GO:0005634::nucleus;GO:0005737::cytoplasm;GO:0005789::endoplasmic reticulum membrane;GO:0005840::ribosome;GO:0005852::eukaryotic translation initiation fa…
NC_037648.1	13206986	13207207	13207091;13207101;13207105	142	140	162	159	164	202	2.34377	2.27433	2.66505	2.6	2.8809	2.66336	2.37809	2.30763	2.70408	2.63807	2.92309	2.70236	-0.161221	0.131155	1	-	-	-	+	+	+	Intron (XM_006566399.3/410341, intron 2 of 7)	13045937	13211347	165411	2	410341	#NAME?	4140	GO:0001522::pseudouridine synthesis;GO:0003723::RNA binding;GO:0009451::RNA modification;GO:0009982::pseudouridine synthase activity
NC_037649.1	7044061	7044333	7044191;7044204;7044206	418	352	441	498	462	685	6.86741	5.69389	7.2267	8.10875	8.08398	9.00032	5.66626	4.698	5.96271	6.69049	6.67005	7.42612	-0.3484	0.0386736	1	-	-	-	+	+	+	Promoter (<=1kb)	7044915	7062744	17830	1	410368	#NAME?	-582	GO:0005509::calcium ion binding;GO:0007156::homophilic cell adhesion via plasma membrane adhesion molecules;GO:0016020::membrane
NC_037649.1	11146834	11147045	11146949;11146953;11147014	114	161	169	171	174	234	1.88485	2.61306	2.7795	2.795	3.0555	3.0832	2.00266	2.77639	2.95323	2.9697	3.24648	3.27591	-0.295833	0.173393	1	-	-	-	+	+	+	Intron (XM_006566860.3/410379, intron 6 of 9)	11131317	11160765	29449	2	410379	#NAME?	13720	GO:0003779::actin binding;GO:0004114::3',5'-cyclic-nucleotide phosphodiesterase activity;GO:0005739::mitochondrion;GO:0006886::intracellular protein transport;GO:0006888::ER to Golgi vesicle-mediated transport;GO:0007010::cytoskeleton organization;GO:0007165::signal transduction;GO:0008233::peptidase activity;GO:0030127::COPII vesicle coat
NC_037649.1	8823284	8823565	8823395;8823431;8823440	170	176	201	225	203	213	2.80269	2.85501	3.3027	3.6725	3.56184	2.80768	2.23868	2.28047	2.63807	2.93345	2.84506	2.24267	-0.164414	0.329781	1	-	-	-	+	+	+	Intron (XM_006566980.3/408390, intron 4 of 9)	8832683	8835212	2530	2	410388	#NAME?	11647	GO:0003824::catalytic activity;GO:0005102::receptor binding;GO:0009451::RNA modification;GO:0014068::positive regulation of phosphatidylinositol 3-kinase signaling;GO:0016020::membrane;GO:0043548::phosphatidylinositol 3-kinase binding;GO:0050776::regulation of immune response;GO:0051536::iron-sulfur cluster binding;GO:0051539::4 iron, 4 sulfur cluster binding
NC_037649.1	10604588	10604888	10604720;10604722;10604730	163	127	118	251	177	266	2.68796	2.06464	1.94565	4.095	3.10788	3.50304	2.01151	1.54506	1.45601	3.06446	2.32576	2.62147	-0.676553	0.0239219	1	-	-	-	+	+	+	Intron (XM_006566892.3/410393, intron 2 of 7)	10493582	10549381	55800	2	410393	#NAME?	-55207	GO:0003824::catalytic activity;GO:0006355::regulation of transcription, DNA-templated;GO:0008152::metabolic process;GO:0016791::phosphatase activity;GO:0046872::metal ion binding
NC_037650.1	6338875	6339177	6339009;6339030;6339046	249	202	195	272	229	258	4.0975	3.27439	3.2046	4.43625	4.0158	3.39808	3.04609	2.43419	2.38231	3.29792	2.98535	2.52614	-0.164042	0.365361	1	-	-	-	+	+	+	Promoter (<=1kb)	6326339	6338517	12179	2	410456	#NAME?	-358	GO:0007165::signal transduction;GO:0016020::membrane;GO:0016788::hydrolase activity, acting on ester bonds
NC_037650.1	6353179	6353449	6353310;6353331;6353320	227	329	302	337	313	480	3.73692	5.3229	4.95405	5.4925	5.48244	6.31072	3.10607	4.42431	4.11773	4.56528	4.55692	5.24537	-0.30272	0.137409	1	-	-	-	+	+	+	Promoter (<=1kb)	6326339	6354364	28026	2	410456	#NAME?	915	GO:0007165::signal transduction;GO:0016020::membrane;GO:0016788::hydrolase activity, acting on ester bonds
NC_037651.1	4612854	4613180	4613007;4613018;4613020	157	137	173	245	211	341	2.58962	2.22594	2.8449	3.9975	3.70152	4.48704	1.78384	1.53332	1.95968	2.75364	2.54976	3.09086	-0.669729	0.00765733	1	-	-	-	+	+	+	3' UTR	4608778	4637928	29151	1	410482	#NAME?	4076	.
NC_037651.1	7304628	7304898	7304749;7304765;7304741	180	143	162	201	231	210	2.96659	2.32272	2.66505	3.2825	4.05072	2.76832	2.46578	1.93061	2.21515	2.72836	3.36689	2.30098	-0.344757	0.186089	1	-	-	-	+	+	+	Intron (XM_016916277.2/410498, intron 2 of 23)	7282413	7389256	106844	1	410498	#NAME?	22215	GO:0004930::G-protein coupled receptor activity;GO:0005216::ion channel activity;GO:0005515::protein binding;GO:0005524::ATP binding;GO:0005618::cell wall;GO:0006073::cellular glucan metabolic process;GO:0006355::regulation of transcription, DNA-templated;GO:0006811::ion transport;GO:0006812::cation transport;GO:0007186::G-protein coupled receptor signaling pathway;GO:0008324::cation transmembran…
NC_037651.1	7360688	7361555	7361158;7361094;7361225	338	213	285	427	348	401	5.55621	3.45182	4.6761	6.955	6.09354	5.27424	1.44187	0.895767	1.21347	1.80486	1.58131	1.36869	-0.421135	0.121928	1	-	-	-	+	+	+	Intron (XM_016916277.2/410498, intron 9 of 23)	7393078	7409855	16778	2	410499	#NAME?	48300	GO:0003677::DNA binding;GO:0004564::beta-fructofuranosidase activity;GO:0004575::sucrose alpha-glucosidase activity;GO:0005672::transcription factor TFIIA complex;GO:0006355::regulation of transcription, DNA-templated;GO:0006367::transcription initiation from RNA polymerase II promoter;GO:0043565::sequence-specific DNA binding
NC_037651.1	8844895	8845377	8845106;8845244;8845230	167	157	176	318	264	241	2.75352	2.54854	2.89395	5.18375	4.6269	3.17504	1.28413	1.18853	1.34962	2.41748	2.15779	1.48071	-0.663929	0.112781	1	-	-	-	+	+	+	Promoter (<=1kb)	8825320	8845095	19776	2	410535	#NAME?	0	GO:0003677::DNA binding;GO:0003700::sequence-specific DNA binding transcription factor activity;GO:0003779::actin binding;GO:0006355::regulation of transcription, DNA-templated;GO:0007010::cytoskeleton organization
NC_037652.1	9181687	9181901	9181782;9181790;9181794	93	144	148	171	155	215	1.54066	2.33885	2.43615	2.795	2.72376	2.83392	1.61412	2.45036	2.5523	2.92826	2.85362	2.96904	-0.403306	0.137312	1	-	-	-	+	+	+	Intron (XM_026445416.1/410573, intron 1 of 14)	9128176	9189932	61757	2	410573	#NAME?	8031	GO:0005515::protein binding
NC_037652.1	8982750	8983209	8982955;8982918;8983187;8983097	159	164	189	243	211	285	2.6224	2.66145	3.1065	3.965	3.70152	3.75232	1.28413	1.30325	1.52118	1.94156	1.81254	1.83742	-0.444613	0.0102864	1	-	-	-	+	+	+	Exon (XM_394055.7/410577, exon 4 of 10)	8967017	8987907	20891	2	410577	#NAME?	4698	GO:0016787::hydrolase activity
NC_037652.1	8810196	8810443	8810317;8810319;8810324	614	406	558	753	550	1020	10.0798	6.56491	9.13965	12.2525	9.62046	13.3955	9.15518	5.96271	8.30127	11.1286	8.73797	12.1667	-0.451882	0.1086	1	-	-	-	+	+	+	Promoter (<=1kb)	8800859	8810003	9145	2	410581	#NAME?	-193	GO:0004872::receptor activity;GO:0016021::integral component of membrane
NC_037652.1	3147728	3148023	3147873;3147868;3147888	138	127	146	185	222	206	2.27821	2.06464	2.40345	3.0225	3.89358	2.71584	1.73368	1.57116	1.82898	2.30007	2.96295	2.06671	-0.513727	0.10303	1	-	-	-	+	+	+	Distal Intergenic	3070981	3076631	5651	2	410633	#NAME?	-71097	GO:0016021::integral component of membrane;GO:0022857::transmembrane transporter activity;GO:0055085::transmembrane transport
NC_037638.1	16442178	16442464	16442309;16442315;16442357	183	169	139	201	208	315	3.01576	2.7421	2.289	3.2825	3.64914	4.14592	2.36691	2.15213	1.79651	2.57626	2.86401	3.25391	-0.461142	0.0382289	1	-	-	-	+	+	+	Intron (XM_006570861.3/410706, intron 2 of 14)	16169657	16480979	311323	2	410706	#NAME?	38515	GO:0004252::serine-type endopeptidase activity;GO:0004540::ribonuclease activity;GO:0004930::G-protein coupled receptor activity;GO:0005215::transporter activity;GO:0005515::protein binding;GO:0005886::plasma membrane;GO:0006810::transport;GO:0007165::signal transduction;GO:0007186::G-protein coupled receptor signaling pathway;GO:0008289::lipid binding;GO:0008948::oxaloacetate decarboxylase activ…
NC_037638.1	16452599	16453008	16452886;16452843;16452869	156	191	192	247	248	292	2.57323	3.09696	3.15555	4.03	4.34754	3.84416	1.41371	1.70145	1.73364	2.21405	2.38851	2.11195	-0.469656	0.00986506	1	-	-	-	+	+	+	Intron (XM_006570861.3/410706, intron 2 of 14)	16169657	16480979	311323	2	410706	#NAME?	27971	GO:0004252::serine-type endopeptidase activity;GO:0004540::ribonuclease activity;GO:0004930::G-protein coupled receptor activity;GO:0005215::transporter activity;GO:0005515::protein binding;GO:0005886::plasma membrane;GO:0006810::transport;GO:0007165::signal transduction;GO:0007186::G-protein coupled receptor signaling pathway;GO:0008289::lipid binding;GO:0008948::oxaloacetate decarboxylase activ…
NC_037638.1	10937078	10937318	10937201;10937201;10937207	251	244	325	412	389	417	4.13028	3.95185	5.3301	6.71125	6.8094	5.48416	3.86037	3.6936	4.98178	6.27268	6.36441	5.12578	-0.502815	0.0373505	1	-	-	-	+	+	+	Promoter (<=1kb)	10934934	10937237	2304	2	410726	#NAME?	0	GO:0008270::zinc ion binding
NC_037638.1	8579040	8579446	8579194;8579275;8579254	145	164	170	221	284	336	2.39294	2.66145	2.79585	3.6075	4.9761	4.42144	1.32435	1.47296	1.54734	1.99654	2.75398	2.44701	-0.728262	0.0402863	1	-	-	-	+	+	+	Intron (XM_026443702.1/410732, intron 3 of 5)	8534937	8554710	19774	2	410732	#NAME?	-24330	GO:0001104::RNA polymerase II transcription cofactor activity;GO:0004252::serine-type endopeptidase activity;GO:0004672::protein kinase activity;GO:0005524::ATP binding;GO:0005672::transcription factor TFIIA complex;GO:0005886::plasma membrane;GO:0006357::regulation of transcription from RNA polymerase II promoter;GO:0006367::transcription initiation from RNA polymerase II promoter;GO:0006468::pr…
NC_037638.1	3001226	3001543	3001402;3001432;3001372	140	136	156	188	144	195	2.31099	2.20981	2.56695	3.07125	2.5317	2.57152	1.63696	1.56529	1.81826	2.17548	1.79329	1.8215	-0.205797	0.16439	1	-	-	-	+	+	+	Intron (XM_026439028.1/410758, intron 3 of 6)	2889433	3119466	230034	1	410758	#NAME?	111793	GO:0003743::translation initiation factor activity;GO:0003899::DNA-directed RNA polymerase activity;GO:0004190::aspartic-type endopeptidase activity;GO:0005219::ryanodine-sensitive calcium-release channel activity;GO:0005634::nucleus;GO:0005737::cytoplasm;GO:0005739::mitochondrion;GO:0005789::endoplasmic reticulum membrane;GO:0005852::eukaryotic translation initiation factor 3 complex;GO:0006270:…
NC_037638.1	25625062	25625358	25625204;25625233;25625235	151	123	135	190	177	209	2.49128	2.00012	2.2236	3.10375	3.10788	2.7552	1.88944	1.51693	1.68642	2.35395	2.35708	2.0896	-0.417211	0.0162217	1	-	-	-	+	+	+	Distal Intergenic	25465942	25582039	116098	2	410775	#NAME?	-43023	.
NC_037638.1	25492155	25492399	25492269;25492313;25492307	182	206	231	223	220	321	2.99937	3.33891	3.7932	3.64	3.85866	4.22464	2.75759	3.06977	3.48744	3.34658	3.54762	3.8841	-0.210534	0.143459	1	-	-	-	+	+	+	Intron (XM_026442277.1/410775, intron 11 of 40)	25465947	25510641	44695	2	410775	#NAME?	18242	.
NC_037639.1	13389138	13389350	13389250;13389263;13389260	86	157	124	170	158	201	1.42593	2.54854	2.04375	2.77875	2.77614	2.65024	1.50794	2.69512	2.1613	2.93857	2.93581	2.80267	-0.447189	0.151662	1	-	-	-	+	+	+	Promoter (<=1kb)	13385246	13389277	4032	2	410828	#NAME?	0	GO:0004833::tryptophan 2,3-dioxygenase activity;GO:0005737::cytoplasm;GO:0006779::porphyrin-containing compound biosynthetic process;GO:0019441::tryptophan catabolic process to kynurenine;GO:0020037::heme binding;GO:0055114::oxidation-reduction process
NC_037639.1	12294931	12295432	12295057;12295333;12295340	134	214	207	385	271	345	2.21265	3.46795	3.4008	6.2725	4.74912	4.53952	0.992831	1.55609	1.52596	2.81451	2.13096	2.03691	-0.776961	0.037754	1	-	-	-	+	+	+	3' UTR	12306207	12420287	114081	1	410852	#NAME?	-10775	GO:0004518::nuclease activity;GO:0005515::protein binding;GO:0015093::ferrous iron transmembrane transporter activity;GO:0015684::ferrous iron transport;GO:0016021::integral component of membrane
NC_037639.1	11961949	11962403	11962128;11962110;11962128	172	159	188	262	245	504	2.83547	2.5808	3.09015	4.27375	4.29516	6.6256	1.40372	1.27764	1.5298	2.11575	2.12635	3.28005	-0.836926	0.0990497	1	-	-	-	+	+	+	Intron (XM_006568172.2/410856, intron 1 of 5)	11840402	11967737	127336	2	410856	#NAME?	5334	GO:0005524::ATP binding;GO:0097588::archaeal or bacterial-type flagellum-dependent cell motility
NC_037640.1	3712344	3712603	3712456;3712467;3712470	147	149	233	245	309	365	2.42572	2.4195	3.8259	3.9975	5.4126	4.80192	2.10152	2.09613	3.31457	3.46323	4.6892	4.16014	-0.712821	0.0420404	1	-	-	-	+	+	+	Promoter (<=1kb)	3567413	3713212	145800	2	410967	#NAME?	609	GO:0003924::GTPase activity;GO:0005524::ATP binding;GO:0005525::GTP binding;GO:0005739::mitochondrion;GO:0016020::membrane;GO:0016887::ATPase activity
NC_037641.1	11347461	11348231	11347605;11348059;11347582;11348064;11348065	263	276	312	507	393	404	4.32696	4.46801	5.11755	8.255	6.87924	5.3136	1.26414	1.30535	1.49511	2.41173	2.0098	1.55239	-0.555565	0.115058	1	-	-	-	+	+	+	Intron (XM_006567227.3/411009, intron 1 of 11)	11295002	11429683	134682	1	411009	#NAME?	52459	GO:0005869::dynactin complex
NC_037642.1	8762085	8762319	8762212;8762192;8762229	116	95	155	160	155	211	1.91763	1.54848	2.5506	2.61625	2.72376	2.78144	1.83808	1.48424	2.44479	2.50771	2.61076	2.66605	-0.432763	0.135155	1	-	-	-	+	+	+	Intron (XM_006565579.3/100576196, intron 3 of 11)	8838191	8841522	3332	2	411095	#NAME?	79203	GO:0006812::cation transport;GO:0008324::cation transmembrane transporter activity;GO:0016021::integral component of membrane;GO:0055085::transmembrane transport
NC_037643.1	12678039	12678267	12678136;12678151;12678156	141	131	108	166	158	190	2.32738	2.12916	1.78215	2.71375	2.77614	2.50592	2.28928	2.0943	1.75297	2.66932	2.73069	2.46489	-0.358001	0.0471124	1	-	-	-	+	+	+	Intron (XM_006569976.3/411155, intron 8 of 25)	12702838	12914327	211490	1	411155	#NAME?	-24571	GO:0005186::pheromone activity;GO:0005515::protein binding;GO:0031505::fungal-type cell wall organization
NC_037643.1	10473619	10473902	10473737;10473756;10473748	108	162	229	177	187	252	1.78651	2.62919	3.7605	2.8925	3.28248	3.31936	1.41695	2.08531	2.98259	2.29415	2.60346	2.63271	-0.215637	0.525783	1	-	-	-	+	+	+	Distal Intergenic	10560790	10848372	287583	1	411158	#NAME?	-86888	GO:0000902::cell morphogenesis;GO:0005515::protein binding;GO:0006955::immune response;GO:0008982::protein-N(PI)-phosphohistidine-sugar phosphotransferase activity;GO:0016020::membrane;GO:0042470::melanosome
NC_037645.1	4921477	4921741	4921578;4921599;4921633	149	89	140	173	153	209	2.4585	1.4517	2.30535	2.8275	2.68884	2.7552	2.08973	1.23395	1.95956	2.40338	2.28552	2.34193	-0.412274	0.158128	1	-	-	-	+	+	+	Intron (XM_006561437.3/408960, intron 2 of 30)	5054745	5076070	21326	1	411248	#NAME?	-133004	GO:0003677::DNA binding;GO:0004867::serine-type endopeptidase inhibitor activity;GO:0005515::protein binding;GO:0006313::transposition, DNA-mediated;GO:0015074::DNA integration;GO:0019031::viral envelope
NC_037639.1	4936722	4937208	4936804;4937108;4936839;4937096;4936832;4937103	141	236	241	288	261	335	2.32738	3.82281	3.9567	4.69625	4.57452	4.40832	1.07648	1.76815	1.83008	2.17214	2.11584	2.03897	-0.436633	0.147008	1	-	-	-	+	+	+	Distal Intergenic	4839190	4897530	58341	2	411348	#NAME?	-39192	GO:0000042::protein targeting to Golgi;GO:0005515::protein binding;GO:0007049::cell cycle
NC_037652.1	5109916	5110162	5110025;5110018;5110030	323	460	499	632	759	716	5.31036	7.43593	8.175	10.2863	13.2696	9.40704	4.84277	6.78117	7.45517	9.38056	12.1012	8.57872	-0.655873	0.0555291	1	-	-	-	+	+	+	Intron (XM_026445540.1/411569, intron 1 of 16)	5106147	5150785	44639	1	411569	#NAME?	3769	GO:0005515::protein binding;GO:0005524::ATP binding;GO:0008270::zinc ion binding;GO:0046872::metal ion binding
NC_037652.1	5109315	5109717	5109401;5109379;5109395;5109621	488	580	567	648	751	723	8.01471	9.37153	9.2868	10.5463	13.1299	9.49888	4.4797	5.23808	5.19072	5.8947	7.33876	5.30926	-0.314718	0.171981	1	-	-	-	+	+	+	Intron (XM_026445540.1/411569, intron 1 of 16)	5106147	5150785	44639	1	411569	#NAME?	3168	GO:0005515::protein binding;GO:0005524::ATP binding;GO:0008270::zinc ion binding;GO:0046872::metal ion binding
NC_037649.1	3100312	3100607	3100430;3100451;3100439	432	466	331	317	371	512	7.09687	7.53271	5.4282	5.1675	6.49512	6.73056	5.4006	5.73226	4.13077	3.93238	4.94267	5.12184	0.124991	0.531128	1	-	-	-	+	+	+	Promoter (1-2kb)	3096191	3102290	6100	2	411807	#NAME?	1683	GO:0016020::membrane;GO:0016021::integral component of membrane;GO:0030001::metal ion transport;GO:0046873::metal ion transmembrane transporter activity;GO:0055085::transmembrane transport
NC_037646.1	7910168	7910662	7910290;7910302;7910308	120	204	207	290	235	345	1.98319	3.30665	3.4008	4.72875	4.12056	4.53952	0.902455	1.5047	1.54754	2.15183	1.87507	2.06572	-0.623496	0.0606448	1	-	-	-	+	+	+	Promoter (<=1kb)	7908332	7910671	2340	2	411837	#NAME?	9	GO:0016888::endodeoxyribonuclease activity, producing 5'-phosphomonoesters
NC_037645.1	8201380	8201594	8201482;8201479;8201494	219	263	329	313	352	439	3.6058	4.25832	5.3955	5.1025	6.16338	5.7728	3.77772	4.46135	5.65275	5.34578	6.45724	6.04804	-0.361774	0.122902	1	-	-	-	+	+	+	Promoter (1-2kb)	8202853	8204178	1326	1	411856	#NAME?	-1259	.
NC_037643.1	16556592	16556825	16556715;16556721;16556732	72	110	135	172	162	257	1.19647	1.79043	2.2236	2.81125	2.84598	3.38496	1.15173	1.72349	2.14046	2.70614	2.73957	3.2584	-0.79525	0.0296981	1	-	-	-	+	+	+	Exon (XM_395404.7/411935, exon 5 of 8)	16548609	16559614	11006	1	411935	#NAME?	7983	GO:0003333::amino acid transmembrane transport;GO:0006810::transport;GO:0015171::amino acid transmembrane transporter activity;GO:0016020::membrane;GO:0055085::transmembrane transport
NC_037644.1	4525007	4525277	4525145;4525133;4525152	78	111	128	238	268	331	1.29481	1.80656	2.10915	3.88375	4.69674	4.35584	1.07623	1.50158	1.75309	3.22811	3.90386	3.6205	-1.31193	0.00153566	1	-	-	-	+	+	+	Intron (XR_003305069.1/411986, intron 1 of 23)	4332357	4424471	92115	2	411986	#NAME?	-100536	GO:0003682::chromatin binding;GO:0009523::photosystem II;GO:0015979::photosynthesis;GO:0016020::membrane;GO:0042301::phosphate ion binding;GO:0050821::protein stabilization
NC_037652.1	2251557	2251831	2251676;2251690;2251677	144	148	132	176	211	272	2.37655	2.40337	2.17455	2.87625	3.70152	3.58176	1.94662	1.96859	1.78116	2.35592	3.03189	2.9338	-0.546821	0.0448249	1	-	-	-	+	+	+	Promoter (1-2kb)	2253684	2259949	6266	1	412203	#NAME?	-1853	GO:0002949::tRNA threonylcarbamoyladenosine modification;GO:0003924::GTPase activity;GO:0005524::ATP binding;GO:0005525::GTP binding;GO:0006614::SRP-dependent cotranslational protein targeting to membrane;GO:0008152::metabolic process;GO:0016020::membrane;GO:0016301::kinase activity;GO:0016887::ATPase activity
NC_037651.1	4954206	4954490	4954302;4954375;4954373	92	154	179	217	172	228	1.52427	2.50015	2.943	3.5425	3.02058	3.00448	1.20471	1.976	2.32601	2.79983	2.38733	2.3746	-0.457527	0.163305	1	-	-	-	+	+	+	Promoter (<=1kb)	4954201	4961358	7158	1	412313	#NAME?	5	GO:0003676::nucleic acid binding;GO:0003677::DNA binding;GO:0005524::ATP binding;GO:0005634::nucleus;GO:0006397::mRNA processing;GO:0016787::hydrolase activity;GO:0046660::female sex differentiation;GO:0050485::oxidoreductase activity, acting on X-H and Y-H to form an X-Y bond, with a disulfide as acceptor;GO:0055114::oxidation-reduction process
NC_037644.1	4722574	4722837	4722703;4722711;4722712	75	148	138	214	191	251	1.24564	2.40337	2.27265	3.49375	3.35232	3.30624	1.06281	2.05061	1.93908	2.98095	2.86028	2.82096	-0.777734	0.0581479	1	-	-	-	+	+	+	Promoter (<=1kb)	4722736	4729199	6464	1	412332	#NAME?	0	.
NC_037642.1	5902348	5902721	5902458;5902470;5902465	268	324	265	375	392	600	4.40891	5.24225	4.3491	6.11	6.86178	7.88512	2.65538	3.15728	2.61935	3.6799	4.13268	4.74901	-0.575071	0.0279592	1	-	-	-	+	+	+	Promoter (<=1kb)	5900101	5902734	2634	2	412382	#NAME?	13	GO:0006835::dicarboxylic acid transport;GO:0016020::membrane;GO:0017153::sodium:dicarboxylate symporter activity
NC_037643.1	4780605	4780978	4780749;4780800;4780823	98	160	173	241	201	269	1.62261	2.59693	2.8449	3.9325	3.52692	3.5424	0.977258	1.56407	1.71341	2.36845	2.12418	2.1335	-0.639095	0.0588979	1	-	-	-	+	+	+	Distal Intergenic	4786516	4789053	2538	2	412448	#NAME?	8075	GO:0016020::membrane;GO:0030001::metal ion transport;GO:0046873::metal ion transmembrane transporter activity;GO:0055085::transmembrane transport
NC_037646.1	6947645	6948009	6947808;6947884;6947867	229	271	261	473	402	457	3.7697	4.38736	4.2837	7.7025	7.03638	6.00896	2.32638	2.70755	2.64358	4.75341	4.34233	3.70828	-0.737887	0.0193732	1	-	-	-	+	+	+	Promoter (2-3kb)	6950795	7020477	69683	1	412763	#NAME?	-2786	GO:0004252::serine-type endopeptidase activity;GO:0005515::protein binding;GO:0006508::proteolysis;GO:0010167::response to nitrate;GO:0015706::nitrate transport;GO:0016020::membrane;GO:0016021::integral component of membrane
NC_037647.1	4521383	4521696	4521487;4521495;4521522	88	134	177	249	179	246	1.45871	2.17755	2.9103	4.0625	3.1428	3.24064	1.04642	1.56209	2.08773	2.91427	2.25452	2.3247	-0.674133	0.0710037	1	-	-	-	+	+	+	Promoter (<=1kb)	4521531	4523615	2085	1	412782	#NAME?	0	GO:0004550::nucleoside diphosphate kinase activity;GO:0006165::nucleoside diphosphate phosphorylation;GO:0006183::GTP biosynthetic process;GO:0006228::UTP biosynthetic process;GO:0006241::CTP biosynthetic process
NC_037645.1	4033548	4033783	4033656;4033673;4033670	316	269	316	309	307	453	5.19563	4.3551	5.18295	5.0375	5.37768	5.95648	4.95898	4.15674	4.94688	4.80806	5.13274	5.68518	-0.152083	0.230593	1	-	-	-	+	+	+	Intron (XM_026442230.1/412825, intron 2 of 36)	4014983	4056726	41744	1	412825	#NAME?	18565	GO:0005509::calcium ion binding;GO:0005515::protein binding;GO:0005737::cytoplasm;GO:0009523::photosystem II;GO:0015979::photosynthesis;GO:0016021::integral component of membrane;GO:0019684::photosynthesis, light reaction
NC_037645.1	6656513	6656849	6656609;6656746;6656620;6656612	230	246	230	273	302	273	3.78609	3.98411	3.77685	4.4525	5.29038	3.59488	2.53062	2.66298	2.52445	2.97605	3.53609	2.40282	-0.207992	0.346617	1	-	-	-	+	+	+	Intron (XM_026442488.1/725999, intron 2 of 6)	6638496	6653476	14981	2	412835	#NAME?	-3037	GO:0005515::protein binding
NC_037648.1	1857524	1857820	1857691;1857629;1857666	250	350	383	400	422	560	4.11389	5.66163	6.2784	6.51625	7.38558	7.36032	3.12006	4.2939	4.76167	4.94206	5.60138	5.58222	-0.405362	0.0979361	1	-	-	-	+	+	+	Intron (XM_006558939.3/412839, intron 1 of 5)	1865557	1885038	19482	1	412839	#NAME?	-7737	GO:0003677::DNA binding;GO:0006355::regulation of transcription, DNA-templated
NC_037640.1	12492830	12493075	12492946;12492951;12492954	125	171	167	247	355	437	2.06514	2.77436	2.7468	4.03	6.21576	5.74656	1.89095	2.54035	2.51512	3.69009	5.69149	5.26186	-1.07591	0.0399566	1	-	-	-	+	+	+	Promoter (2-3kb)	12496012	12505715	9704	1	412956	#NAME?	-2937	GO:0008146::sulfotransferase activity;GO:0016021::integral component of membrane
NC_037640.1	12379315	12380117	12379450;12379735;12379454;12379723;12380008;12379437;12379740;12379976	257	270	263	694	829	606	4.22862	4.37123	4.3164	11.2938	14.4918	7.96384	1.18618	1.22618	1.2108	3.16804	4.06512	2.23395	-1.38568	0.0663285	1	-	-	-	+	+	+	Intron (XM_016911312.2/412956, intron 2 of 6)	12343105	12505715	162611	1	412956	#NAME?	36210	GO:0008146::sulfotransferase activity;GO:0016021::integral component of membrane
NC_037640.1	12378592	12378895	12378752;12378754;12378758	125	104	128	277	406	319	2.06514	1.69365	2.10915	4.5175	7.10622	4.1984	1.53018	1.25492	1.56279	3.34727	5.2654	3.11083	-1.43102	0.0663314	1	-	-	-	+	+	+	Intron (XM_016911312.2/412956, intron 2 of 6)	12343105	12505715	162611	1	412956	#NAME?	35487	GO:0008146::sulfotransferase activity;GO:0016021::integral component of membrane
NC_037640.1	12509965	12510235	12510096;12510114;12510110	205	200	225	297	323	402	3.37634	3.24213	3.6951	4.8425	5.65704	5.28736	2.80636	2.69481	3.07131	4.02501	4.70204	4.39477	-0.614184	0.00557545	1	-	-	-	+	+	+	Distal Intergenic	12497059	12505715	8657	1	412956	#NAME?	12906	GO:0008146::sulfotransferase activity;GO:0016021::integral component of membrane
NC_037642.1	4944031	4944260	4944174;4944121;4944149	194	168	216	195	192	238	3.19605	2.72597	3.54795	3.185	3.36978	3.13568	3.13006	2.66968	3.47469	3.11924	3.3002	3.07093	-0.0332053	0.791524	1	-	-	-	+	+	+	Promoter (<=1kb)	4934872	4945135	10264	2	413128	#NAME?	875	GO:0016021::integral component of membrane
NC_037645.1	3550239	3550455	3550345;3550350;3550358	112	146	134	194	171	232	1.85207	2.37111	2.20725	3.16875	3.00312	3.05696	1.92249	2.46127	2.29118	3.28923	3.11731	3.17319	-0.521233	0.0183188	1	-	-	-	+	+	+	Promoter (<=1kb)	3548170	3550361	2192	2	413184	#NAME?	0	.
NC_037647.1	696908	697166	697034;697028;697038	103	149	126	209	167	245	1.70456	2.4195	2.07645	3.4125	2.93328	3.22752	1.48245	2.10423	1.80588	2.96783	2.55106	2.80696	-0.626629	0.0144147	1	-	-	-	+	+	+	Intron (XM_006557264.3/413242, intron 1 of 11)	527331	704313	176983	2	413242	#NAME?	7147	GO:0006506::GPI anchor biosynthetic process;GO:0008146::sulfotransferase activity;GO:0015016::[heparan sulfate]-glucosamine N-sulfotransferase activity;GO:0016021::integral component of membrane;GO:0016787::hydrolase activity;GO:0017176::phosphatidylinositol N-acetylglucosaminyltransferase activity
NC_037645.1	2388706	2388953	2388818;2388837;2388841	130	121	142	197	188	216	2.14709	1.96786	2.33805	3.2175	3.29994	2.84704	1.95014	1.78735	2.12358	2.92236	2.99724	2.58588	-0.537229	0.00631268	1	-	-	-	+	+	+	Promoter (<=1kb)	2380212	2388002	7791	2	413254	#NAME?	-704	GO:0046983::protein dimerization activity
NC_037645.1	12558463	12558765	12558619;12558620;12558635	241	335	248	536	423	635	3.96638	5.41968	4.07115	8.72625	7.40304	8.34432	2.94862	4.029	3.0265	6.48711	5.50344	6.20319	-0.862848	0.00424134	1	-	-	-	+	+	+	3' UTR	12555229	12558191	2963	1	413264	#NAME?	3234	GO:0006629::lipid metabolic process
NC_037640.1	11033977	11034259	11034116;11034098;11034131	199	160	194	211	210	255	3.278	2.59693	3.18825	3.445	3.68406	3.35872	2.60909	2.067	2.53765	2.74201	2.93229	2.67334	-0.21062	0.142941	1	-	-	-	+	+	+	Intron (XM_006567988.3/413289, intron 1 of 14)	10834908	11049222	214315	2	413289	#NAME?	14963	GO:0005219::ryanodine-sensitive calcium-release channel activity;GO:0005509::calcium ion binding;GO:0005515::protein binding;GO:0005672::transcription factor TFIIA complex;GO:0006367::transcription initiation from RNA polymerase II promoter;GO:0006874::cellular calcium ion homeostasis;GO:0007219::Notch signaling pathway;GO:0007275::multicellular organismal development;GO:0008855::exodeoxyribonucl…
NC_037640.1	11046934	11047197	11047057;11047056;11047071	296	200	248	328	293	355	4.86783	3.24213	4.07115	5.34625	5.13324	4.67072	4.15334	2.76626	3.4736	4.56154	4.3798	3.98517	-0.314692	0.157743	1	-	-	-	+	+	+	Promoter (2-3kb)	10834908	11049222	214315	2	413289	#NAME?	2025	GO:0005219::ryanodine-sensitive calcium-release channel activity;GO:0005509::calcium ion binding;GO:0005515::protein binding;GO:0005672::transcription factor TFIIA complex;GO:0006367::transcription initiation from RNA polymerase II promoter;GO:0006874::cellular calcium ion homeostasis;GO:0007219::Notch signaling pathway;GO:0007275::multicellular organismal development;GO:0008855::exodeoxyribonucl…
NC_037641.1	7890858	7891209	7890965;7890972;7890988	985	1100	774	965	1046	1586	16.1605	17.7591	12.6713	15.6975	18.2806	20.8214	10.3414	11.3644	8.10858	10.0451	11.6981	13.324	-0.234115	0.264118	1	-	-	-	+	+	+	Promoter (2-3kb)	7888039	7956952	68914	1	413371	#NAME?	2819	GO:0003735::structural constituent of ribosome;GO:0005622::intracellular;GO:0005840::ribosome;GO:0006355::regulation of transcription, DNA-templated;GO:0006412::translation;GO:0007218::neuropeptide signaling pathway;GO:0007631::feeding behavior
NC_037641.1	12287761	12288105	12287933;12287936;12287960	1606	1451	1320	1208	1744	2211	26.3387	23.4208	21.5983	19.6463	30.4677	29.0214	17.1966	15.2915	14.1016	12.8271	19.8924	18.9481	-0.149252	0.536233	1	-	-	-	+	+	+	Promoter (2-3kb)	12278652	12285532	6881	2	413423	#NAME?	-2229	GO:0005515::protein binding;GO:0030176::integral component of endoplasmic reticulum membrane;GO:2001256::regulation of store-operated calcium entry
NC_037640.1	4325806	4326036	4325930;4325928;4325925	214	219	239	284	294	416	3.52385	3.5486	3.924	4.63125	5.1507	5.47104	3.43615	3.46028	3.82634	4.51599	5.02251	5.33488	-0.472054	0.0139387	1	-	-	-	+	+	+	Promoter (<=1kb)	4322013	4325859	3847	2	413498	#NAME?	0	GO:0003677::DNA binding;GO:0005515::protein binding
NC_037647.1	2553279	2553735	2553399;2553723;2553406;2553418	100	194	150	363	328	556	1.65539	3.14535	2.46885	5.915	5.74434	7.30784	0.815926	1.55031	1.21687	2.91545	2.83133	3.60196	-1.38356	0.00427408	1	-	-	-	+	+	+	Intron (XM_006559222.3/413510, intron 1 of 7)	2546343	2572211	25869	1	413510	#NAME?	6936	GO:0004672::protein kinase activity;GO:0005524::ATP binding;GO:0006468::protein phosphorylation;GO:0016020::membrane;GO:0016773::phosphotransferase activity, alcohol group as acceptor;GO:0045444::fat cell differentiation
NC_037650.1	7243069	7243354	7243234;7243237;7243250	128	198	182	247	272	348	2.11431	3.20987	2.99205	4.03	4.76658	4.57888	1.66521	2.52806	2.35651	3.17399	3.75411	3.60628	-0.685587	0.0184055	1	-	-	-	+	+	+	Distal Intergenic	7252933	7262789	9857	2	413596	#NAME?	19435	GO:0000725::recombinational repair;GO:0003677::DNA binding;GO:0004672::protein kinase activity;GO:0005524::ATP binding;GO:0005634::nucleus;GO:0006260::DNA replication;GO:0006468::protein phosphorylation;GO:0015074::DNA integration;GO:0097196::Shu complex
NC_037650.1	7249259	7249503	7249376;7249375;7249384	160	160	128	176	180	220	2.63879	2.59693	2.10915	2.87625	3.16026	2.89952	2.42608	2.3876	1.93913	2.6444	2.90552	2.66579	-0.282897	0.0691746	1	-	-	-	+	+	+	Distal Intergenic	7252933	7262789	9857	2	413596	#NAME?	13286	GO:0000725::recombinational repair;GO:0003677::DNA binding;GO:0004672::protein kinase activity;GO:0005524::ATP binding;GO:0005634::nucleus;GO:0006260::DNA replication;GO:0006468::protein phosphorylation;GO:0015074::DNA integration;GO:0097196::Shu complex
NC_037638.1	4616292	4616562	4616402;4616409;4616441	181	122	121	169	161	238	2.98298	1.98399	1.9947	2.7625	2.82852	3.13568	2.47941	1.64906	1.65796	2.29615	2.35102	2.60633	-0.326003	0.210864	1	-	-	-	+	+	+	Intron (XM_006561930.3/414037, intron 2 of 8)	4621604	4629678	8075	1	414037	#NAME?	-5042	GO:0005102::receptor binding;GO:0005576::extracellular region;GO:0007275::multicellular organismal development;GO:0016055::Wnt signaling pathway
NC_037641.1	9533443	9533785	9533573;9533581;9533601	65	175	142	225	248	300	1.08174	2.83888	2.33805	3.6725	4.34754	3.94912	0.710387	1.86432	1.53542	2.41176	2.85506	2.59342	-0.935394	0.0537297	1	-	-	-	+	+	+	Distal Intergenic	9333421	9513878	180458	2	550811	#NAME?	-19565	.
NC_037638.1	16214090	16214354	16214210;16214233;16214237	253	261	307	315	304	393	4.16306	4.22606	5.0358	5.135	5.3253	5.16928	3.53861	3.59217	4.28045	4.36477	4.52652	4.39391	-0.219366	0.114812	1	-	-	-	+	+	+	Intron (XM_006570861.3/410706, intron 8 of 14)	16083669	16169039	85371	2	550899	#NAME?	-45051	GO:0005887::integral component of plasma membrane;GO:0016021::integral component of membrane
NC_037643.1	16090404	16090641	16090517;16090519;16090526	629	719	742	767	728	1193	10.3257	11.6136	12.148	12.48	12.7283	15.6653	9.77258	10.9915	11.4973	11.8115	12.0465	14.8261	-0.261935	0.144435	1	-	-	-	+	+	+	Exon (XM_026441457.1/550930, exon 3 of 8)	16065811	16094569	28759	2	550930	#NAME?	3928	GO:0004672::protein kinase activity;GO:0004675::transmembrane receptor protein serine/threonine kinase activity;GO:0005524::ATP binding;GO:0006120::mitochondrial electron transport, NADH to ubiquinone;GO:0006468::protein phosphorylation;GO:0008137::NADH dehydrogenase (ubiquinone) activity;GO:0016020::membrane;GO:0055114::oxidation-reduction process
NC_037643.1	16095226	16095488	16095342;16095354;16095349	309	389	460	625	544	897	5.0809	6.2907	7.53735	10.1725	9.5157	11.7818	4.35162	5.38778	6.45549	8.71241	8.14989	10.0907	-0.734908	0.0128998	1	-	-	-	+	+	+	Promoter (<=1kb)	16065811	16095989	30179	2	550930	#NAME?	501	GO:0004672::protein kinase activity;GO:0004675::transmembrane receptor protein serine/threonine kinase activity;GO:0005524::ATP binding;GO:0006120::mitochondrial electron transport, NADH to ubiquinone;GO:0006468::protein phosphorylation;GO:0008137::NADH dehydrogenase (ubiquinone) activity;GO:0016020::membrane;GO:0055114::oxidation-reduction process
NC_037652.1	868897	869364	868980;869270;868991;869231;869259	61	145	178	247	230	347	1.01618	2.35498	2.92665	4.03	4.03326	4.56576	0.489093	1.13346	1.40861	1.93966	1.94123	2.19752	-1.00382	0.0541389	1	-	-	-	+	+	+	Intron (XM_026445673.1/724865, intron 1 of 11)	877167	923047	45881	1	550941	#NAME?	-7803	GO:0003924::GTPase activity;GO:0004930::G-protein coupled receptor activity;GO:0005524::ATP binding;GO:0005525::GTP binding;GO:0007186::G-protein coupled receptor signaling pathway;GO:0016020::membrane;GO:0016021::integral component of membrane;GO:0016887::ATPase activity
NC_037650.1	3861423	3861683	3861535;3861498;3861571	161	156	193	267	226	330	2.65518	2.53241	3.1719	4.355	3.96342	4.34272	2.2915	2.18555	2.73745	3.7585	3.42055	3.7479	-0.59892	0.00576357	1	-	-	-	+	+	+	Exon (XR_001705338.2/107965406, exon 2 of 2)	3852016	3854279	2264	2	550955	#NAME?	-7144	.
NC_037640.1	6356365	6356605	6356484;6356473;6356484	94	133	153	167	203	212	1.55705	2.16142	2.5179	2.73	3.56184	2.79456	1.4553	2.02017	2.35336	2.5516	3.32908	2.61194	-0.543002	0.0703868	1	-	-	-	+	+	+	Exon (XR_001702410.2/107964181, exon 2 of 2)	6325723	6350905	25183	2	550964	#NAME?	-5460	GO:0004383::guanylate cyclase activity;GO:0004672::protein kinase activity;GO:0005524::ATP binding;GO:0006182::cGMP biosynthetic process;GO:0006468::protein phosphorylation;GO:0009190::cyclic nucleotide biosynthetic process;GO:0016849::phosphorus-oxygen lyase activity;GO:0035556::intracellular signal transduction
NC_037643.1	10944494	10944805	10944633;10944633;10944676	157	163	133	209	208	229	2.58962	2.64532	2.1909	3.4125	3.64914	3.0176	1.8696	1.90981	1.58174	2.46368	2.63453	2.17858	-0.440761	0.0214356	1	-	-	-	+	+	+	Distal Intergenic	10863916	10867261	3346	2	551045	#NAME?	-77233	GO:0003676::nucleic acid binding;GO:0005634::nucleus
NC_037643.1	10957831	10958425	10957932;10958157;10957998;10958089	195	175	185	296	204	251	3.21244	2.83888	3.0411	4.82625	3.5793	3.30624	1.21614	1.07472	1.15128	1.82709	1.35503	1.25165	-0.365225	0.198336	1	-	-	-	+	+	+	Distal Intergenic	10863916	10867261	3346	2	551045	#NAME?	-90570	GO:0003676::nucleic acid binding;GO:0005634::nucleus
NC_037644.1	13446580	13446868	13446707;13446716;13446734	542	490	423	665	472	911	8.89977	7.91983	6.9324	10.8225	8.25858	11.9654	6.93661	6.17283	5.40322	8.43522	6.43686	9.32601	-0.386381	0.143414	1	-	-	-	+	+	+	Promoter (1-2kb)	13443389	13448355	4967	2	551089	#NAME?	1487	.
NC_037646.1	1641745	1641996	1641862;1641861;1641858	128	123	152	224	184	248	2.11431	2.00012	2.50155	3.65625	3.2301	3.26688	1.88988	1.78781	2.23602	3.26815	2.88723	2.92011	-0.617912	0.00460696	1	-	-	-	+	+	+	Promoter (<=1kb)	1640328	1642114	1787	2	551097	#NAME?	118	.
NC_037640.1	12068766	12069175	12068850;12068863;12069081;12068862	1184	2124	1669	1637	1870	2820	19.4221	34.2762	27.3045	26.6175	32.6677	37.0115	10.6704	18.8311	15.0009	14.6235	17.9474	20.3338	-0.249515	0.391825	1	-	-	-	+	+	+	3' UTR	12073019	12075755	2737	1	551124	#NAME?	-3844	GO:0005515::protein binding;GO:0007166::cell surface receptor signaling pathway;GO:0016020::membrane
NC_037639.1	13481662	13482047	13481909;13481837;13481940	170	197	149	290	210	236	2.80269	3.19374	2.4525	4.72875	3.68406	3.10944	1.63551	1.86371	1.43116	2.75947	2.14984	1.81452	-0.447582	0.150577	1	-	-	-	+	+	+	Exon (XM_006568983.3/551167, exon 11 of 19)	13461655	13494272	32618	1	551167	#NAME?	20007	GO:0003723::RNA binding;GO:0003724::RNA helicase activity;GO:0003924::GTPase activity;GO:0004871::signal transducer activity;GO:0004930::G-protein coupled receptor activity;GO:0005524::ATP binding;GO:0005525::GTP binding;GO:0006355::regulation of transcription, DNA-templated;GO:0006810::transport;GO:0007186::G-protein coupled receptor signaling pathway;GO:0007606::sensory perception of chemical s…
NC_037648.1	8280888	8281141	8281018;8281016;8281043	144	162	151	173	183	275	2.37655	2.62919	2.4852	2.8275	3.21264	3.62112	2.10756	2.3316	2.20391	2.50747	2.84902	3.21126	-0.367065	0.0758264	1	-	-	-	+	+	+	Promoter (<=1kb)	8275098	8280672	5575	2	551268	#NAME?	-216	GO:0006629::lipid metabolic process;GO:0008152::metabolic process;GO:0016787::hydrolase activity
NC_037638.1	18291741	18291963	18291837;18291840;18291850	211	259	215	300	303	448	3.47468	4.1938	3.5316	4.89125	5.30784	5.89088	3.50975	4.23613	3.56725	4.94062	5.36142	5.95034	-0.522653	0.0130496	1	-	-	-	+	+	+	Distal Intergenic	18299986	18361551	61566	1	551356	#NAME?	-8023	GO:0005515::protein binding;GO:0005634::nucleus;GO:0006047::UDP-N-acetylglucosamine metabolic process;GO:0006886::intracellular protein transport;GO:0006888::ER to Golgi vesicle-mediated transport;GO:0016021::integral component of membrane;GO:0016903::oxidoreductase activity, acting on the aldehyde or oxo group of donors;GO:0030127::COPII vesicle coat;GO:0031224::intrinsic component of membrane;G…
NC_037645.1	1283111	1283363	1283209;1283223;1283213	91	151	135	180	178	215	1.50788	2.45176	2.2236	2.94125	3.12534	2.83392	1.3425	2.18285	1.97971	2.61865	2.78255	2.52309	-0.525525	0.0755576	1	-	-	-	+	+	+	Intron (XM_016913560.2/551432, intron 1 of 8)	1212925	1274537	61613	2	551432	#NAME?	-8574	GO:0004252::serine-type endopeptidase activity;GO:0005515::protein binding;GO:0005886::plasma membrane;GO:0006355::regulation of transcription, DNA-templated;GO:0006631::fatty acid metabolic process;GO:0006779::porphyrin-containing compound biosynthetic process;GO:0043565::sequence-specific DNA binding;GO:0050151::oleate hydratase activity;GO:0055114::oxidation-reduction process;GO:0071949::FAD b…
NC_037645.1	1268229	1268649	1268392;1268388;1268396	966	803	1155	1192	1675	1726	15.8491	12.9685	18.9006	19.3863	29.263	22.6582	8.47987	6.93864	10.1125	10.3724	15.6568	12.123	-0.579514	0.095479	1	-	-	-	+	+	+	Intron (XM_006558196.3/551432, intron 1 of 8)	1212925	1273591	60667	2	551432	#NAME?	4942	GO:0004252::serine-type endopeptidase activity;GO:0005515::protein binding;GO:0005886::plasma membrane;GO:0006355::regulation of transcription, DNA-templated;GO:0006631::fatty acid metabolic process;GO:0006779::porphyrin-containing compound biosynthetic process;GO:0043565::sequence-specific DNA binding;GO:0050151::oleate hydratase activity;GO:0055114::oxidation-reduction process;GO:0071949::FAD b…
NC_037643.1	17204191	17204531	17204301;17204385;17204407	208	185	192	225	228	252	3.42551	3.00018	3.15555	3.6725	3.99834	3.31936	2.26275	1.9818	2.08443	2.42591	2.64114	2.19264	-0.197933	0.125793	1	-	-	-	+	+	+	Intron (XM_026441563.1/551460, intron 1 of 8)	17106794	17214962	108169	2	551460	#NAME?	10431	GO:0003677::DNA binding;GO:0006355::regulation of transcription, DNA-templated;GO:0008855::exodeoxyribonuclease VII activity;GO:0016020::membrane
NC_037653.1	4193782	4194125	4193953;4193965;4193997	162	210	190	277	256	354	2.67157	3.40343	3.12285	4.5175	4.48722	4.6576	1.74934	2.22856	2.04484	2.95805	2.93823	3.04979	-0.570834	0.0155488	1	-	-	-	+	+	+	Intron (XM_026445717.1/551506, intron 1 of 1)	4180294	4214923	34630	1	551506	#NAME?	13488	GO:0003677::DNA binding;GO:0003723::RNA binding;GO:0003726::double-stranded RNA adenosine deaminase activity
NC_037642.1	8490759	8491102	8490910;8490936;8490974	84	151	140	169	173	286	1.39315	2.45176	2.30535	2.7625	3.03804	3.76544	0.912233	1.60541	1.50954	1.80888	1.98931	2.46561	-0.637265	0.0638516	1	-	-	-	+	+	+	Promoter (<=1kb)	8490975	8493005	2031	1	551526	#NAME?	0	GO:0003677::DNA binding;GO:0003917::DNA topoisomerase type I activity;GO:0005215::transporter activity;GO:0005694::chromosome;GO:0005886::plasma membrane;GO:0006265::DNA topological change;GO:0015721::bile acid and bile salt transport;GO:0019069::viral capsid assembly;GO:0046982::protein heterodimerization activity
NC_037652.1	3754632	3754935	3754762;3754795;3754778	70	138	162	195	195	262	1.16369	2.24207	2.66505	3.185	3.42216	3.45056	0.862244	1.66128	1.97469	2.35995	2.53567	2.55672	-0.728342	0.0921681	1	-	-	-	+	+	+	Promoter (<=1kb)	3754660	3756709	2050	1	551551	#NAME?	0	.
NC_037649.1	8551541	8551785	8551653;8551650;8551656	534	747	656	1122	827	1267	8.76865	12.0652	10.7419	18.2488	14.4569	16.6362	8.06182	11.0926	9.87601	16.7778	13.2915	15.2952	-0.643996	0.0158886	1	-	-	-	+	+	+	Promoter (<=1kb)	8551511	8555305	3795	1	551591	#NAME?	30	.
NC_037653.1	3677725	3677983	3677843;3677837;3677838	228	374	333	504	495	733	3.75331	6.04875	5.4609	8.20625	8.66016	9.63008	3.26423	5.26056	4.74931	7.13693	7.53169	8.37523	-0.795766	0.0151315	1	-	-	-	+	+	+	Intron (XM_016916906.2/551594, intron 1 of 5)	3674246	3820751	146506	1	551594	#NAME?	3479	GO:0003677::DNA binding;GO:0005634::nucleus;GO:0008121::ubiquinol-cytochrome-c reductase activity;GO:0008270::zinc ion binding;GO:0009236::cobalamin biosynthetic process;GO:0016021::integral component of membrane;GO:0019087::transformation of host cell by virus;GO:0055114::oxidation-reduction process
NC_037644.1	13568701	13569018	13568865;13568868;13568855	166	140	141	214	185	256	2.73713	2.27433	2.3217	3.49375	3.24756	3.37184	1.93881	1.61099	1.64454	2.47475	2.30036	2.3884	-0.463726	0.0120235	1	-	-	-	+	+	+	Intron (XM_006569436.3/551804, intron 5 of 8)	13556952	13616761	59810	1	551804	#NAME?	11749	GO:0003700::sequence-specific DNA binding transcription factor activity;GO:0003735::structural constituent of ribosome;GO:0005622::intracellular;GO:0005634::nucleus;GO:0005840::ribosome;GO:0006355::regulation of transcription, DNA-templated;GO:0006412::translation;GO:0006810::transport;GO:0016020::membrane;GO:0043565::sequence-specific DNA binding
NC_037640.1	5533028	5533398	5533188;5533195;5533236	322	252	290	416	286	481	5.29397	4.08089	4.75785	6.77625	5.01102	6.32384	3.21421	2.47769	2.88871	4.11417	3.04242	3.83949	-0.357837	0.115572	1	-	-	-	+	+	+	Intron (XM_026439340.1/551828, intron 1 of 15)	5500738	5686185	185448	1	551828	NM_001242574.1	32290	GO:0031514::motile cilium;GO:0048870::cell motility
NC_037650.1	1720861	1721232	1721062;1721026;1721018	142	142	131	237	277	430	2.34377	2.30659	2.1582	3.8675	4.85388	5.65472	1.41918	1.39667	1.30682	2.34182	2.93909	3.42401	-1.07825	0.03811	1	-	-	-	+	+	+	Intron (XM_006572115.3/552030, intron 1 of 7)	1696087	1753992	57906	1	552030	#NAME?	24774	GO:0015708::silicate transport;GO:0046872::metal ion binding
NC_037652.1	3262539	3262821	3262674;3262689;3262685	123	156	172	234	223	249	2.03236	2.53241	2.82855	3.81875	3.91104	3.28	1.61764	2.01565	2.25135	3.03949	3.11295	2.61068	-0.574493	0.0175752	1	-	-	-	+	+	+	Promoter (2-3kb)	3263913	3265021	1109	2	552072	#NAME?	2200	GO:0000178::exosome (RNase complex);GO:0003723::RNA binding
NC_037642.1	5456400	5456645	5456517;5456506;5456520	74	137	143	179	203	269	1.22925	2.22594	2.3544	2.925	3.56184	3.5424	1.12557	2.03819	2.15582	2.67829	3.26141	3.24361	-0.787704	0.0375623	1	-	-	-	+	+	+	Promoter (1-2kb)	5458434	5470655	12222	1	552195	#NAME?	-1789	GO:0003779::actin binding;GO:0005213::structural constituent of chorion;GO:0005576::extracellular region;GO:0007010::cytoskeleton organization;GO:0007304::chorion-containing eggshell formation;GO:0042600::chorion
NC_037638.1	14942263	14942515	14942379;14942395;14942391	425	258	233	374	464	622	6.98214	4.17767	3.8259	6.09375	8.1189	8.17376	6.21634	3.71946	3.40627	5.42539	7.22842	7.27726	-0.579036	0.120327	1	-	-	-	+	+	+	Intron (XM_006570751.3/552243, intron 1 of 14)	14905383	14938966	33584	2	552243	#NAME?	-3297	GO:0005634::nucleus;GO:0008171::O-methyltransferase activity
NC_037646.1	7625452	7625733	7625582;7625600;7625611	120	124	150	181	183	220	1.98319	2.01625	2.46885	2.9575	3.21264	2.89952	1.5841	1.6105	1.97202	2.36234	2.56613	2.31603	-0.487664	0.0143206	1	-	-	-	+	+	+	Intron (XM_026442747.1/552340, intron 1 of 8)	7588050	7621884	33835	2	552340	#NAME?	-3568	GO:0005578::proteinaceous extracellular matrix;GO:0016020::membrane;GO:0016972::thiol oxidase activity;GO:0043395::heparan sulfate proteoglycan binding;GO:0055114::oxidation-reduction process
NC_037649.1	9909361	9909721	9909479;9909495;9909499	838	855	772	697	702	1237	13.7512	13.8073	12.6386	11.3425	12.2744	16.2426	8.58025	8.61525	7.88603	7.07731	7.65878	10.1348	0.0121678	0.94805	1	-	-	-	+	+	+	Intron (XM_026444405.1/552397, intron 1 of 4)	9706257	9931963	225707	2	552397	#NAME?	22242	GO:0003743::translation initiation factor activity;GO:0004190::aspartic-type endopeptidase activity;GO:0004252::serine-type endopeptidase activity;GO:0005634::nucleus;GO:0005668::RNA polymerase transcription factor SL1 complex;GO:0005737::cytoplasm;GO:0005783::endoplasmic reticulum;GO:0005789::endoplasmic reticulum membrane;GO:0005852::eukaryotic translation initiation factor 3 complex;GO:0005886…
NC_037650.1	3479021	3479308	3479166;3479168;3479162	64	152	147	252	210	283	1.06535	2.46789	2.4198	4.11125	3.68406	3.72608	0.833233	1.93019	1.89258	3.2155	2.88138	2.91425	-0.952616	0.0466822	1	-	-	-	+	+	+	Promoter (<=1kb)	3477262	3479205	1944	2	552409	#NAME?	0	GO:0003676::nucleic acid binding
NC_037642.1	9315229	9315465	9315342;9315346;9315335	228	195	195	256	290	331	3.75331	3.16148	3.2046	4.17625	5.08086	4.35584	3.56724	3.00475	3.04573	3.96922	4.82898	4.1399	-0.427857	0.0310149	1	-	-	-	+	+	+	Promoter (<=1kb)	9290858	9315676	24819	2	552512	#NAME?	211	GO:0003777::microtubule motor activity;GO:0005524::ATP binding;GO:0007018::microtubule-based movement;GO:0008017::microtubule binding
NC_037642.1	11751209	11751465	11751321;11751349;11751340	330	314	368	371	468	615	5.42509	5.08095	6.03315	6.045	8.18874	8.08192	4.75489	4.45326	5.28783	5.29822	7.17712	7.0835	-0.432168	0.0949319	1	-	-	-	+	+	+	Intron (XM_026440798.1/552513, intron 2 of 11)	11746225	11759189	12965	1	552513	#NAME?	4984	GO:0005515::protein binding;GO:0016020::membrane
NC_037645.1	1952774	1953212	1952871;1952879;1953134;1952873;1953198	107	177	219	302	269	304	1.77012	2.87114	3.597	4.92375	4.7142	4.0016	0.908249	1.47318	1.84562	2.52638	2.41886	2.05322	-0.727384	0.0569825	1	-	-	-	+	+	+	Promoter (<=1kb)	1952823	1956528	3706	1	552528	#NAME?	0	GO:0005509::calcium ion binding;GO:0005783::endoplasmic reticulum;GO:0006457::protein folding;GO:0051082::unfolded protein binding
NC_037652.1	4476146	4476526	4476271;4476319;4476272	249	233	340	420	356	437	4.0975	3.77442	5.57535	6.84125	6.23322	5.74656	2.42248	2.23147	3.2962	4.04461	3.68514	3.39742	-0.485032	0.0631602	1	-	-	-	+	+	+	Promoter (<=1kb)	4475526	4476733	1208	1	552641	#NAME?	620	GO:0003735::structural constituent of ribosome;GO:0005622::intracellular;GO:0005840::ribosome;GO:0006412::translation
NC_037648.1	15558495	15558846	15558643;15558695;15558682	303	324	334	388	406	451	4.98256	5.24225	5.47725	6.32125	7.10622	5.93024	3.18843	3.35461	3.50499	4.04508	4.54739	3.79486	-0.301954	0.0559035	1	-	-	-	+	+	+	Exon (XM_026443967.1/552804, exon 4 of 6)	15555446	15562788	7343	2	552804	#NAME?	3942	GO:0005515::protein binding
NC_037647.1	8443768	8443982	8443858;8443868;8443870	129	129	139	179	149	182	2.1307	2.0969	2.289	2.925	2.619	2.40096	2.23229	2.19688	2.39814	3.06446	2.74387	2.51543	-0.285921	0.0734655	1	-	-	-	+	+	+	Promoter (<=1kb)	8443849	8445821	1973	1	724152	#NAME?	0	GO:0003677::DNA binding;GO:0005634::nucleus;GO:0005664::nuclear origin of replication recognition complex;GO:0005739::mitochondrion;GO:0006260::DNA replication;GO:0031144::proteasome localization;GO:0071630::nucleus-associated proteasomal ubiquitin-dependent protein catabolic process
NC_037638.1	16668972	16669225	16669096;16669095;16669104	78	129	142	398	301	414	1.29481	2.0969	2.33805	6.48375	5.27292	5.4448	1.14826	1.85956	2.07342	5.74988	4.6761	4.82853	-1.58599	0.00168706	1	-	-	-	+	+	+	Promoter (2-3kb)	16651286	16671767	20482	2	724237	#NAME?	2542	GO:0004930::G-protein coupled receptor activity;GO:0007186::G-protein coupled receptor signaling pathway;GO:0016021::integral component of membrane
NC_037638.1	2388052	2388424	2388277;2388280;2388274	156	122	160	292	295	265	2.57323	1.98399	2.63235	4.76125	5.16816	3.48992	1.55395	1.19811	1.58965	2.87527	3.121	2.10753	-0.900335	0.0395209	1	-	-	-	+	+	+	Promoter (2-3kb)	2275775	2385878	110104	2	724238	#NAME?	-2174	GO:0003677::DNA binding;GO:0004190::aspartic-type endopeptidase activity;GO:0005634::nucleus;GO:0005680::anaphase-promoting complex;GO:0006355::regulation of transcription, DNA-templated;GO:0006397::mRNA processing;GO:0016021::integral component of membrane;GO:0030071::regulation of mitotic metaphase/anaphase transition;GO:0031145::anaphase-promoting complex-dependent proteasomal ubiquitin-depend…
NC_037640.1	260293	260563	260417;260427;260423	140	112	153	204	207	220	2.31099	1.82269	2.5179	3.33125	3.63168	2.89952	1.92086	1.51499	2.09284	2.76888	3.01859	2.41003	-0.568249	0.0224797	1	-	-	-	+	+	+	Promoter (<=1kb)	261149	279857	18709	1	724270	#NAME?	-586	.
NC_037647.1	7470237	7470597	7470420;7470436;7470448	140	142	108	329	182	394	2.31099	2.30659	1.78215	5.3625	3.19518	5.1824	1.44197	1.43923	1.112	3.34601	1.99368	3.23363	-1.10231	0.0641289	1	-	-	-	+	+	+	Intron (XM_006564488.3/724333, intron 2 of 7)	7165790	7496893	331104	2	724333	#NAME?	26296	GO:0005515::protein binding
NC_037642.1	2751042	2751344	2751168;2751230;2751196	134	110	141	188	209	266	2.21265	1.79043	2.3217	3.07125	3.6666	3.50304	1.64489	1.33101	1.72596	2.28317	2.72576	2.60417	-0.695254	0.00571316	1	-	-	-	+	+	+	Exon (XM_026440994.1/724385, exon 4 of 10)	2745465	2760725	15261	1	724385	#NAME?	5577	GO:0046872::metal ion binding
NC_037648.1	14568786	14569284	14568891;14568887;14568912	152	249	208	273	268	347	2.50767	4.0325	3.41715	4.4525	4.69674	4.56576	1.13197	1.82029	1.54252	2.00988	2.12013	2.061	-0.461925	0.102104	1	-	-	-	+	+	+	Promoter (2-3kb)	14563526	14566557	3032	2	724502	#NAME?	-2229	GO:0004867::serine-type endopeptidase inhibitor activity;GO:0005515::protein binding;GO:0005576::extracellular region;GO:0005634::nucleus;GO:0006355::regulation of transcription, DNA-templated
NC_037650.1	9586142	9586541	9586439;9586448;9586462	254	198	283	350	350	375	4.17945	3.20987	4.6434	5.70375	6.12846	4.93312	2.35356	1.80757	2.61482	3.21194	3.4511	2.77797	-0.478518	0.0470365	1	-	-	-	+	+	+	Intron (XM_001120437.5/724548, intron 1 of 12)	9508603	9594974	86372	2	724548	#NAME?	8433	GO:0005515::protein binding
NC_037644.1	13677687	13677932	13677785;13677783;13677788	157	117	128	223	176	266	2.58962	1.90334	2.10915	3.64	3.09042	3.50304	2.3712	1.7428	1.93125	3.33298	2.82976	3.20757	-0.632295	0.0108856	1	-	-	-	+	+	+	Intron (XR_001703746.2/102654335, intron 1 of 3)	13656699	13680971	24273	2	724569	#NAME?	3039	.
NC_037644.1	13676425	13676710	13676552;13676591;13676564	143	145	153	237	209	264	2.36016	2.35498	2.5179	3.8675	3.6666	3.4768	1.85884	1.85476	1.98307	3.04601	2.88778	2.73829	-0.606258	0.00255508	1	-	-	-	+	+	+	Intron (XR_001703746.2/102654335, intron 1 of 3)	13656699	13680971	24273	2	724569	#NAME?	4261	.
NC_037644.1	13677013	13677278	13677133;13677148;13677152	141	154	169	238	179	299	2.32738	2.50015	2.7795	3.88375	3.1428	3.936	1.97084	2.11715	2.3537	3.28879	2.66135	3.33304	-0.527178	0.0304597	1	-	-	-	+	+	+	Intron (XR_001703746.2/102654335, intron 1 of 3)	13656699	13680971	24273	2	724569	#NAME?	3693	.
NC_037649.1	7909005	7909302	7909165;7909119;7909167	167	162	165	227	173	269	2.75352	2.62919	2.7141	3.705	3.03804	3.5424	2.08132	1.98734	2.05152	2.80052	2.29638	2.67761	-0.345178	0.0637292	1	-	-	-	+	+	+	Distal Intergenic	7915515	7923213	7699	2	724801	#NAME?	13911	GO:0003677::DNA binding;GO:0006355::regulation of transcription, DNA-templated
NC_037653.1	2698104	2698312	2698206;2698213;2698210	202	224	200	228	197	289	3.32717	3.62925	3.28635	3.72125	3.45708	3.8048	3.58588	3.91144	3.54188	4.0106	3.72589	4.10064	-0.100683	0.176661	1	-	-	-	+	+	+	Promoter (<=1kb)	2698150	2698881	732	1	724807	#NAME?	0	.
NC_037646.1	3305523	3305904	3305682;3305703;3305699	161	160	147	361	423	294	2.65518	2.59693	2.4198	5.8825	7.40304	3.8704	1.56566	1.53131	1.42686	3.46869	4.36529	2.28223	-1.16105	0.0900075	1	-	-	-	+	+	+	Promoter (1-2kb)	3293858	3303952	10095	2	724936	#NAME?	-1571	GO:0005515::protein binding
NC_037645.1	4545819	4546100	4545935;4545956;4545967	150	160	126	191	137	212	2.47489	2.59693	2.07645	3.12	2.40948	2.79456	1.97685	2.07433	1.65859	2.49214	1.9246	2.23219	-0.21969	0.208925	1	-	-	-	+	+	+	Intron (XM_026442430.1/725021, intron 2 of 7)	4511467	4540248	28782	2	725021	#NAME?	-5571	GO:0004252::serine-type endopeptidase activity;GO:0004571::mannosyl-oligosaccharide 1,2-alpha-mannosidase activity;GO:0004860::protein kinase inhibitor activity;GO:0005509::calcium ion binding;GO:0005576::extracellular region;GO:0006508::proteolysis;GO:0016020::membrane
NC_037640.1	12852569	12852806	12852683;12852693;12852692	67	121	199	269	261	321	1.11452	1.96786	3.27	4.3875	4.57452	4.22464	1.05482	1.86245	3.09483	4.15247	4.32947	3.99834	-1.05371	0.0645786	1	-	-	-	+	+	+	Intron (XM_006569213.3/413503, intron 2 of 7)	12863157	12867241	4085	2	725123	#NAME?	14435	GO:0004140::dephospho-CoA kinase activity;GO:0005524::ATP binding;GO:0015937::coenzyme A biosynthetic process
NC_037642.1	13218003	13218762	13218323;13218682;13218315;13218702;13218328	291	307	315	417	462	419	4.78588	4.96804	5.1666	6.7925	8.08398	5.5104	1.41845	1.47244	1.53129	2.01318	2.39595	1.63319	-0.450343	0.130805	1	-	-	-	+	+	+	Downstream (<1kb)	13205306	13213175	7870	2	725215	#NAME?	-4828	GO:0003993::acid phosphatase activity
NC_037644.1	10294701	10294969	10294807;10294806;10294846	151	143	172	149	183	208	2.49128	2.32272	2.82855	2.4375	3.21264	2.74208	2.08611	1.94496	2.36853	2.04107	2.69015	2.29612	-0.134998	0.414703	1	-	-	-	+	+	+	Intron (XM_001121189.5/725329, intron 5 of 7)	10246853	10264697	17845	2	725233	#NAME?	-30004	GO:0016020::membrane;GO:0016032::viral process;GO:0055114::oxidation-reduction process
NC_037648.1	15046134	15046422	15046280;15046320;15046360	162	219	170	238	224	362	2.67157	3.5486	2.79585	3.88375	3.9285	4.76256	2.08226	2.76583	2.17913	3.02705	3.06193	3.71201	-0.479974	0.0401749	1	-	-	-	+	+	+	Promoter (2-3kb)	15044461	15048641	4181	2	725245	#NAME?	2219	GO:0005164::tumor necrosis factor receptor binding;GO:0005216::ion channel activity;GO:0005576::extracellular region;GO:0006955::immune response;GO:0009405::pathogenesis;GO:0016020::membrane
NC_037648.1	15952612	15952966	15952737;15952940;15952839;15952847	322	523	598	688	611	999	5.29397	8.45212	9.79365	11.1963	10.6855	13.12	3.35907	5.36295	6.21416	7.10416	6.78005	8.32477	-0.572331	0.0839655	1	-	-	-	+	+	+	3' UTR	15948725	15954049	5325	1	725289	#NAME?	3887	GO:0005515::protein binding
NC_037644.1	9686766	9687028	9686872;9686882;9686899	159	166	168	204	168	224	2.6224	2.69371	2.76315	3.33125	2.95074	2.952	2.246	2.30707	2.36655	2.85311	2.52721	2.52829	-0.192731	0.0817091	1	-	-	-	+	+	+	Intron (XM_006565453.3/725329, intron 3 of 5)	9659436	10447465	788030	1	725329	#NAME?	27330	.
NC_037651.1	6437354	6437569	6437472;6437465;6437490	123	160	165	167	186	219	2.03236	2.59693	2.7141	2.73	3.26502	2.8864	2.1194	2.70815	2.83034	2.84692	3.40485	3.01002	-0.274344	0.129066	1	-	-	-	+	+	+	Promoter (<=1kb)	6437507	6441545	4039	1	725346	#NAME?	0	GO:0005328::neurotransmitter:sodium symporter activity;GO:0006836::neurotransmitter transport;GO:0016021::integral component of membrane
NC_037638.1	24315405	24315785	24315541;24315506;24315521	131	173	162	294	264	233	2.16348	2.80662	2.66505	4.79375	4.6269	3.07008	1.27907	1.6593	1.5756	2.83411	2.73547	1.81506	-0.710129	0.0849822	1	-	-	-	+	+	+	Intron (XM_006571554.3/725460, intron 1 of 6)	24293013	24322966	29954	2	725460	#NAME?	7181	GO:0003779::actin binding;GO:0005515::protein binding;GO:0007010::cytoskeleton organization;GO:0007155::cell adhesion;GO:0009289::pilus;GO:0016021::integral component of membrane
NC_037639.1	15568959	15569224	15569076;15569093;15569089	161	226	139	247	229	339	2.65518	3.66151	2.289	4.03	4.0158	4.4608	2.24843	3.1006	1.93834	3.41264	3.40061	3.77744	-0.539327	0.0733557	1	-	-	-	+	+	+	Downstream (1-2kb)	15564881	15566589	1709	1	725473	#NAME?	4078	GO:0007049::cell cycle
NC_037643.1	3771328	3771970	3771445;3771792;3771436;3771455;3771830	114	125	165	423	308	476	1.88485	2.03238	2.7141	6.89	5.39514	6.25824	0.660286	0.711968	0.950783	2.41365	1.88998	2.19234	-1.48353	0.0031933	1	-	-	-	+	+	+	Promoter (<=1kb)	3772378	3792868	20491	1	725479	#NAME?	-408	GO:0003777::microtubule motor activity;GO:0003924::GTPase activity;GO:0005524::ATP binding;GO:0005741::mitochondrial outer membrane;GO:0006606::protein import into nucleus;GO:0006810::transport;GO:0007018::microtubule-based movement;GO:0008053::mitochondrial fusion;GO:0016021::integral component of membrane;GO:0016887::ATPase activity;GO:0030286::dynein complex
NC_037639.1	12088230	12088530	12088357;12088367;12088378	147	172	133	196	163	263	2.42572	2.79049	2.1909	3.20125	2.86344	3.46368	1.81527	2.08824	1.63954	2.39563	2.14283	2.59202	-0.363319	0.045373	1	-	-	-	+	+	+	Intron (XM_006568167.3/410853, intron 3 of 13)	12129848	12134002	4155	2	725491	#NAME?	45472	GO:0004169::dolichyl-phosphate-mannose-protein mannosyltransferase activity;GO:0006506::GPI anchor biosynthetic process;GO:0016021::integral component of membrane;GO:0016758::transferase activity, transferring hexosyl groups;GO:0035269::protein O-linked mannosylation
NC_037648.1	2762047	2762688	2762175;2762225;2762326;2762613	180	185	274	331	299	345	2.96659	3.00018	4.49625	5.395	5.238	4.53952	1.04085	1.05264	1.57755	1.89288	1.83779	1.59273	-0.536161	0.0698381	1	-	-	-	+	+	+	Promoter (<=1kb)	2762353	2799733	37381	1	725581	#NAME?	0	GO:0006820::anion transport;GO:0008509::anion transmembrane transporter activity;GO:0016021::integral component of membrane
NC_037646.1	10059333	10059559	10059444;10059454;10059463	147	165	178	229	201	306	2.42572	2.67758	2.92665	3.7375	3.52692	4.02784	2.40703	2.65695	2.9041	3.7087	3.49974	3.9968	-0.491871	0.0060617	1	-	-	-	+	+	+	Intron (XM_006561872.3/725710, intron 1 of 5)	10052962	10064523	11562	2	725710	#NAME?	4964	GO:0000772::mating pheromone activity;GO:0008152::metabolic process;GO:0016020::membrane;GO:0016491::oxidoreductase activity
NC_037640.1	7483772	7484011	7483891;7483887;7483917	140	78	112	234	149	164	2.31099	1.27427	1.84755	3.81875	2.619	2.1648	2.16897	1.19596	1.73401	3.58407	2.45805	2.03176	-0.663066	0.156224	1	-	-	-	+	+	+	Distal Intergenic	7423898	7456091	32194	1	725792	#NAME?	59874	GO:0003677::DNA binding;GO:0005515::protein binding;GO:0006865::amino acid transport;GO:0016020::membrane;GO:0046872::metal ion binding
NC_037638.1	14970392	14970664	14970529;14970527;14970533	211	191	200	279	230	301	3.47468	3.09696	3.28635	4.55	4.03326	3.96224	2.86694	2.55529	2.71155	3.75418	3.32782	3.26922	-0.347805	0.0216278	1	-	-	-	+	+	+	Promoter (2-3kb)	14960131	14968175	8045	2	725819	#NAME?	-2217	GO:0005515::protein binding;GO:0016491::oxidoreductase activity;GO:0016817::hydrolase activity, acting on acid anhydrides;GO:0055114::oxidation-reduction process
NC_037640.1	4388057	4388595	4388152;4388480;4388150;4388504;4388486	254	357	360	390	424	478	4.17945	5.77454	5.90235	6.35375	7.4205	6.28448	1.74661	2.41321	2.46662	2.65526	3.10107	2.62632	-0.33917	0.113368	1	-	-	-	+	+	+	Intron (XM_392655.7/409130, intron 1 of 4)	4392007	4393313	1307	1	726129	#NAME?	-3412	.
NC_037642.1	6333340	6333672	6333497;6333499;6333575	107	144	162	180	190	228	1.77012	2.33885	2.66505	2.94125	3.33486	3.00448	1.19736	1.58207	1.80272	1.98955	2.2558	2.03232	-0.454204	0.0672498	1	-	-	-	+	+	+	Distal Intergenic	6311355	6328953	17599	1	726284	#NAME?	21985	GO:0003677::DNA binding;GO:0004882::androgen receptor activity;GO:0005496::steroid binding;GO:0005634::nucleus;GO:0005672::transcription factor TFIIA complex;GO:0006270::DNA replication initiation;GO:0006355::regulation of transcription, DNA-templated;GO:0006367::transcription initiation from RNA polymerase II promoter;GO:0016021::integral component of membrane;GO:0016192::vesicle-mediated transp…
NC_037648.1	14173827	14174068	14173943;14173941;14173941	294	367	328	387	355	416	4.83505	5.93584	5.37915	6.305	6.21576	5.47104	4.50041	5.52501	5.00685	5.86862	5.78556	5.09238	-0.155802	0.213966	1	-	-	-	+	+	+	Promoter (<=1kb)	14171668	14173651	1984	2	726301	#NAME?	-176	GO:0003677::DNA binding;GO:0005885::Arp2/3 protein complex;GO:0015629::actin cytoskeleton;GO:0030041::actin filament polymerization;GO:0034314::Arp2/3 complex-mediated actin nucleation
NC_037652.1	6255676	6255910	6255789;6255839;6255877	60	103	120	183	152	172	0.99979	1.67752	1.97835	2.99	2.67138	2.26976	0.958313	1.60793	1.89628	2.86596	2.56056	2.1756	-0.768543	0.042664	1	-	-	-	+	+	+	Intron (XM_026445312.1/726302, intron 1 of 2)	6242503	6270427	27925	2	726302	#NAME?	14517	GO:0005634::nucleus;GO:0005739::mitochondrion;GO:0006629::lipid metabolic process;GO:0046872::metal ion binding
NC_037651.1	8972991	8973209	8973089;8973100;8973103	180	217	264	421	288	429	2.96659	3.51634	4.33275	6.8575	5.04594	5.6416	3.05126	3.61671	4.45642	7.05323	5.18997	5.80263	-0.697939	0.0315109	1	-	-	-	+	+	+	Intron (XM_006564858.3/726322, intron 3 of 7)	8968251	8977573	9323	1	726322	#NAME?	4740	GO:0004806::triglyceride lipase activity;GO:0006629::lipid metabolic process
NC_037652.1	7695619	7695872	7695737;7695742;7695738	734	762	761	851	1077	1573	12.0466	12.3072	12.4587	13.845	18.8219	20.6509	10.6831	10.9142	11.0486	12.2779	16.6915	18.3135	-0.534422	0.113264	1	-	-	-	+	+	+	Promoter (<=1kb)	7694457	7695656	1200	2	726323	#NAME?	0	GO:0030472::mitotic spindle organization in nucleus;GO:0042729::DASH complex;GO:0072686::mitotic spindle
NC_037641.1	12079684	12080113	12079773;12079959;12079759;12080013	511	434	470	551	499	672	8.39168	7.01655	7.70085	8.97	8.73	8.82976	4.39589	3.67554	4.03401	4.69884	4.57312	4.62537	-0.199152	0.0986687	1	-	-	-	+	+	+	Exon (XM_016911711.2/726335, exon 3 of 8)	12074088	12088247	14160	1	726335	#NAME?	5596	GO:0003700::sequence-specific DNA binding transcription factor activity;GO:0006355::regulation of transcription, DNA-templated;GO:0016020::membrane;GO:0030001::metal ion transport;GO:0046873::metal ion transmembrane transporter activity;GO:0055085::transmembrane transport
NC_037650.1	4363247	4363485	4363353;4363366;4363365	122	144	156	214	183	245	2.01597	2.33885	2.56695	3.49375	3.21264	3.22752	1.9	2.2043	2.41928	3.29276	3.02782	3.04185	-0.521221	0.0103844	1	-	-	-	+	+	+	Promoter (<=1kb)	4356402	4362686	6285	2	726434	#NAME?	-561	GO:0004674::protein serine/threonine kinase activity;GO:0016021::integral component of membrane
NC_037645.1	12116542	12117106	12116635;12117002;12116806;12116742	1099	1117	1044	1159	1184	2058	18.029	18.0333	17.0858	18.85	20.6901	27.0141	7.1877	7.18941	6.81167	7.51501	8.24861	10.7698	-0.324512	0.210874	1	-	-	-	+	+	+	Promoter (<=1kb)	12117114	12127854	10741	1	726625	#NAME?	-8	GO:0003824::catalytic activity;GO:0008152::metabolic process
NC_037643.1	2674830	2675085	2674949;2674952;2674957	161	175	167	172	196	274	2.65518	2.83888	2.7468	2.81125	3.43962	3.608	2.33626	2.49789	2.41687	2.47358	3.02647	3.17463	-0.258627	0.150662	1	-	-	-	+	+	+	Promoter (<=1kb)	2674934	2676864	1931	1	726672	#NAME?	0	GO:0005524::ATP binding;GO:0016020::membrane;GO:0016773::phosphotransferase activity, alcohol group as acceptor
NC_037649.1	9045584	9045914	9045641;9045879;9045798;9045815	153	180	155	294	194	362	2.52406	2.91953	2.5506	4.79375	3.4047	4.76256	1.71766	1.98679	1.73572	3.26222	2.31695	3.241	-0.697154	0.0595945	1	-	-	-	+	+	+	Intron (XM_026444488.1/726709, intron 7 of 33)	8850242	9081288	231047	2	726709	#NAME?	35374	GO:0005515::protein binding;GO:0006355::regulation of transcription, DNA-templated;GO:0006810::transport;GO:0016021::integral component of membrane;GO:0046983::protein dimerization activity
NC_037646.1	11948962	11949329	11949109;11949136;11949117	163	160	162	233	225	255	2.68796	2.59693	2.66505	3.8025	3.94596	3.35872	1.64529	1.58957	1.63126	2.32749	2.4153	2.05586	-0.482477	0.0248056	1	-	-	-	+	+	+	Promoter (<=1kb)	11841389	11949228	107840	2	727000	#NAME?	0	GO:0004129::cytochrome-c oxidase activity;GO:0007165::signal transduction;GO:0019089::transmission of virus
NC_037651.1	9775695	9775950	9775827;9775824;9775825	407	491	362	572	635	980	6.68712	7.93596	5.93505	9.31125	11.1046	12.8707	5.88391	6.98274	5.22217	8.19284	9.77079	11.3248	-0.69523	0.0338497	1	-	-	-	+	+	+	Promoter (2-3kb)	9763973	9778466	14494	2	727081	#NAME?	2516	.
NC_037652.1	2192371	2192613	2192500;2192503;2192508	243	294	269	401	350	462	3.99916	4.75835	4.4145	6.5325	6.12846	6.07456	3.70705	4.41079	4.09206	6.05536	5.68083	5.63086	-0.508301	0.00360276	1	-	-	-	+	+	+	Promoter (<=1kb)	2192420	2196532	4113	1	727228	#NAME?	0	GO:0006891::intra-Golgi vesicle-mediated transport;GO:0017119::Golgi transport complex
NC_037651.1	10426459	10426790	10426544;10426611;10426584	236	256	250	283	266	301	3.88443	4.14541	4.10385	4.615	4.66182	3.96224	2.63546	2.81252	2.78432	3.13112	3.16289	2.68825	-0.125782	0.239276	1	-	-	-	+	+	+	Exon (XM_001122996.5/727287, exon 2 of 4)	10423161	10428085	4925	1	727287	#NAME?	3298	.
NC_037639.1	8163862	8164160	8164013;8164012;8164014	84	166	164	189	196	285	1.39315	2.69371	2.69775	3.0875	3.43962	3.75232	1.04953	2.0293	2.03234	2.32596	2.59123	2.8268	-0.599424	0.099001	1	-	-	-	+	+	+	Promoter (<=1kb)	8162978	8163903	926	2	727300	#NAME?	0	.
NC_037639.1	8286923	8287165	8287055;8287086;8287053	147	140	128	189	183	207	2.42572	2.27433	2.10915	3.0875	3.21264	2.72896	2.24854	2.10821	1.95509	2.86198	2.97798	2.52963	-0.407097	0.0179512	1	-	-	-	+	+	+	Distal Intergenic	8167809	8221278	53470	2	727308	#NAME?	-65645	GO:0000398::mRNA splicing, via spliceosome;GO:0003968::RNA-directed RNA polymerase activity;GO:0005681::spliceosomal complex;GO:0006508::proteolysis;GO:0006813::potassium ion transport;GO:0008190::eukaryotic initiation factor 4E binding;GO:0008234::cysteine-type peptidase activity;GO:0008948::oxaloacetate decarboxylase activity;GO:0015081::sodium ion transmembrane transporter activity;GO:0016020:…
NC_037639.1	8324885	8325187	8325030;8325040;8325017	161	138	155	207	155	275	2.65518	2.24207	2.5506	3.38	2.72376	3.62112	1.97387	1.66676	1.89612	2.5127	2.02485	2.69195	-0.384856	0.0878974	1	-	-	-	+	+	+	Distal Intergenic	8167809	8221278	53470	2	727308	#NAME?	-103607	GO:0000398::mRNA splicing, via spliceosome;GO:0003968::RNA-directed RNA polymerase activity;GO:0005681::spliceosomal complex;GO:0006508::proteolysis;GO:0006813::potassium ion transport;GO:0008190::eukaryotic initiation factor 4E binding;GO:0008234::cysteine-type peptidase activity;GO:0008948::oxaloacetate decarboxylase activity;GO:0015081::sodium ion transmembrane transporter activity;GO:0016020:…
NC_037650.1	9634107	9634367	9634233;9634247;9634253	213	139	223	209	255	272	3.50746	2.2582	3.6624	3.4125	4.46976	3.58176	3.02704	1.94889	3.16076	2.94509	3.85754	3.09117	-0.28208	0.291934	1	-	-	-	+	+	+	Distal Intergenic	9610356	9610455	100	2	100315688	NR_034299.1	-23652	.
NC_037642.1	8667661	8667982	8667782;8667855;8667792	164	153	142	198	189	193	2.70435	2.48402	2.33805	3.23375	3.3174	2.54528	1.89179	1.73766	1.63555	2.26213	2.32064	1.78052	-0.273337	0.153587	1	-	-	-	+	+	+	Distal Intergenic	8678387	8837618	159232	1	100576196	#NAME?	-10405	GO:0001104::RNA polymerase II transcription cofactor activity;GO:0003677::DNA binding;GO:0003700::sequence-specific DNA binding transcription factor activity;GO:0003887::DNA-directed DNA polymerase activity;GO:0004252::serine-type endopeptidase activity;GO:0005634::nucleus;GO:0005732::small nucleolar ribonucleoprotein complex;GO:0005789::endoplasmic reticulum membrane;GO:0005886::plasma membrane;…
NC_037651.1	9520990	9521236	9521117;9521120;9521110	147	120	158	227	181	211	2.42572	1.95173	2.59965	3.705	3.17772	2.78144	2.21213	1.77987	2.37074	3.37876	2.89791	2.53653	-0.470017	0.0590596	1	-	-	-	+	+	+	Intron (XM_016916257.2/100576251, intron 2 of 11)	9469191	9531221	62031	2	100576251	#NAME?	9985	GO:0005634::nucleus;GO:0007010::cytoskeleton organization;GO:0008017::microtubule binding;GO:0016020::membrane;GO:0046872::metal ion binding
NC_037651.1	9522178	9522929	9522388;9522770;9522360;9522402;9522788	287	252	265	502	344	405	4.72032	4.08089	4.3491	8.17375	6.0237	5.32672	1.4139	1.22237	1.30271	2.44833	1.80431	1.59554	-0.570164	0.125554	1	-	-	-	+	+	+	Intron (XM_016916257.2/100576251, intron 2 of 11)	9469191	9531221	62031	2	100576251	#NAME?	8292	GO:0005634::nucleus;GO:0007010::cytoskeleton organization;GO:0008017::microtubule binding;GO:0016020::membrane;GO:0046872::metal ion binding
NC_037651.1	9494884	9495233	9495066;9495065;9495079	176	150	114	257	169	230	2.90103	2.43563	1.88025	4.1925	2.9682	3.03072	1.86703	1.56751	1.21008	2.69818	1.91026	1.95049	-0.497902	0.121936	1	-	-	-	+	+	+	Intron (XM_016916257.2/100576251, intron 3 of 11)	9469191	9531221	62031	2	100576251	#NAME?	35988	GO:0005634::nucleus;GO:0007010::cytoskeleton organization;GO:0008017::microtubule binding;GO:0016020::membrane;GO:0046872::metal ion binding
NC_037642.1	11889483	11889742	11889603;11889609;11889623	161	172	148	209	184	233	2.65518	2.79049	2.43615	3.4125	3.2301	3.07008	2.30031	2.41754	2.11056	2.95642	2.7984	2.65976	-0.301341	0.0130174	1	-	-	-	+	+	+	Intron (XM_006567624.3/408857, intron 6 of 13)	11934596	11937325	2730	2	100576287	#NAME?	47583	.
NC_037647.1	2503342	2503658	2503529;2503629;2503539	140	122	134	230	166	205	2.31099	1.98399	2.20725	3.75375	2.91582	2.70272	1.64212	1.40976	1.56841	2.6673	2.0719	1.92047	-0.527467	0.085912	1	-	-	-	+	+	+	Distal Intergenic	2497762	2502332	4571	1	100576301	#NAME?	5580	.
NC_037642.1	10485412	10485813	10485507;10485501;10485523;10485762	200	226	210	228	215	262	3.29439	3.66151	3.44985	3.72125	3.77136	3.45056	1.84593	2.05164	1.93304	2.08511	2.11319	1.93344	-0.0726498	0.286701	1	-	-	-	+	+	+	Promoter (<=1kb)	10484905	10493225	8321	1	100576597	#NAME?	507	.
NC_037650.1	3520738	3520956	3520848;3520845;3520852	699	1458	1310	1183	1247	2019	11.473	23.5337	21.4349	19.24	21.7901	26.5024	11.8005	24.2054	22.0467	19.7892	22.4121	27.2589	-0.258823	0.448438	1	-	-	-	+	+	+	Promoter (<=1kb)	3509776	3519756	9981	2	100576671	#NAME?	-982	GO:0003677::DNA binding;GO:0003887::DNA-directed DNA polymerase activity;GO:0004674::protein serine/threonine kinase activity;GO:0005096::GTPase activator activity;GO:0005198::structural molecule activity;GO:0005515::protein binding;GO:0005634::nucleus;GO:0005732::small nucleolar ribonucleoprotein complex;GO:0005789::endoplasmic reticulum membrane;GO:0005944::phosphatidylinositol 3-kinase complex…
NC_037639.1	896222	896478	896356;896357;896352	144	134	150	178	207	256	2.37655	2.17755	2.46885	2.90875	3.63168	3.37184	2.08296	1.90854	2.16385	2.54941	3.18303	2.95529	-0.497138	0.031119	1	-	-	-	+	+	+	Intron (XM_026439230.1/100576733, intron 2 of 9)	918811	1005963	87153	1	100576733	#NAME?	-22333	GO:0005524::ATP binding;GO:0035299::inositol pentakisphosphate 2-kinase activity
NC_037650.1	2478191	2478586	2478447;2478449;2478464	256	394	406	539	473	571	4.21223	6.37135	6.65445	8.775	8.27604	7.50464	2.39598	3.62412	3.78515	4.99135	4.70754	4.26875	-0.510462	0.0684079	1	-	-	-	+	+	+	3' UTR	2484937	2488505	3569	1	100576819	#NAME?	-6351	GO:0004197::cysteine-type endopeptidase activity;GO:0006508::proteolysis;GO:0042981::regulation of apoptotic process
NC_037649.1	9222785	9223066	9222946;9222945;9222959	75	116	172	145	178	209	1.24564	1.88721	2.82855	2.3725	3.12534	2.7552	0.99497	1.50743	2.25934	1.89506	2.4964	2.20075	-0.469274	0.234583	1	-	-	-	+	+	+	Intron (XR_003305856.1/113219151, intron 2 of 2)	9228799	9233839	5041	1	100576825	#NAME?	-5733	.
NC_037638.1	8176327	8176556	8176429;8176452;8176457	134	125	138	190	150	228	2.21265	2.03238	2.27265	3.10375	2.63646	3.00448	2.16696	1.99041	2.22572	3.03966	2.58202	2.94244	-0.424049	0.0191399	1	-	-	-	+	+	+	Promoter (<=1kb)	8176362	8178455	2094	1	100577003	#NAME?	0	GO:0003700::sequence-specific DNA binding transcription factor activity;GO:0004674::protein serine/threonine kinase activity;GO:0005634::nucleus;GO:0006355::regulation of transcription, DNA-templated;GO:0008608::attachment of spindle microtubules to kinetochore;GO:0016020::membrane;GO:0030001::metal ion transport;GO:0042729::DASH complex;GO:0044780::bacterial-type flagellum assembly;GO:0046873::m…
NC_037639.1	13761299	13762017	13761451;13761825;13761449;13761447;13761831;13761834	622	845	693	1523	1490	2738	10.211	13.646	11.3469	24.765	26.0329	35.9357	3.19894	4.27507	3.5548	7.75847	8.15568	11.2581	-1.30086	0.0317825	1	-	-	-	+	+	+	Intron (XM_016918069.2/100577139, intron 2 of 18)	13769809	13861999	92191	1	100577139	#NAME?	-7792	GO:0004252::serine-type endopeptidase activity;GO:0005840::ribosome;GO:0005886::plasma membrane;GO:0008083::growth factor activity;GO:0016020::membrane;GO:0019856::pyrimidine nucleobase biosynthetic process
NC_037639.1	13825567	13825855	13825693;13825679;13825684	244	287	296	388	415	526	4.01555	4.64544	4.85595	6.32125	7.26336	6.91424	3.12978	3.62072	3.7848	4.92688	5.66117	5.38906	-0.600774	0.00345457	1	-	-	-	+	+	+	Intron (XM_016918069.2/100577139, intron 5 of 18)	13788560	13861999	73440	1	100577139	#NAME?	37007	GO:0004252::serine-type endopeptidase activity;GO:0005840::ribosome;GO:0005886::plasma membrane;GO:0008083::growth factor activity;GO:0016020::membrane;GO:0019856::pyrimidine nucleobase biosynthetic process
NC_037642.1	7897907	7898247	7898003;7898110;7898151	222	224	209	273	256	257	3.65497	3.62925	3.4335	4.4525	4.48722	3.38496	2.41433	2.39734	2.26803	2.94114	2.96408	2.23597	-0.201552	0.274989	1	-	-	-	+	+	+	Intron (XM_016912223.2/552079, intron 7 of 12)	8103506	8112331	8826	2	100577164	#NAME?	214084	GO:0003723::RNA binding;GO:0003743::translation initiation factor activity;GO:0005850::eukaryotic translation initiation factor 2 complex
NC_037642.1	7928475	7928719	7928577;7928594;7928594	359	276	281	391	362	433	5.9004	4.46801	4.6107	6.37	6.33798	5.69408	5.42478	4.10785	4.23904	5.85652	5.82708	5.23509	-0.296915	0.112922	1	-	-	-	+	+	+	Intron (XM_016912223.2/552079, intron 8 of 12)	8103506	8112331	8826	2	100577164	#NAME?	183612	GO:0003723::RNA binding;GO:0003743::translation initiation factor activity;GO:0005850::eukaryotic translation initiation factor 2 complex
NC_037642.1	7945592	7945891	7945693;7945760;7945760	197	184	172	300	226	256	3.24522	2.98405	2.82855	4.89125	3.96342	3.37184	2.43663	2.24053	2.12378	3.67253	2.97588	2.5317	-0.432777	0.131146	1	-	-	-	+	+	+	Intron (XM_016912223.2/552079, intron 9 of 12)	8103506	8112331	8826	2	100577164	#NAME?	166440	GO:0003723::RNA binding;GO:0003743::translation initiation factor activity;GO:0005850::eukaryotic translation initiation factor 2 complex
NC_037640.1	4715951	4716259	4716049;4716126;4716116	222	284	264	338	262	406	3.65497	4.59705	4.33275	5.50875	4.59198	5.33984	2.66435	3.3511	3.15843	4.0157	3.3474	3.89257	-0.295047	0.07481	1	-	-	-	+	+	+	Intron (XM_006560471.3/100577174, intron 1 of 5)	4706250	4729406	23157	2	100577174	#NAME?	13147	GO:0046872::metal ion binding
NC_037650.1	6756609	6757162	6756878;6756832;6756885	170	184	171	366	229	351	2.80269	2.98405	2.8122	5.96375	4.0158	4.61824	1.13955	1.21329	1.14341	2.4248	1.63278	1.87773	-0.763519	0.0723752	1	-	-	-	+	+	+	Intron (XM_006560311.3/552377, intron 9 of 12)	6696754	6716984	20231	2	100577222	#NAME?	-39625	.
NC_037650.1	6712635	6713000	6712778;6712779;6712782	186	138	194	386	233	280	3.06493	2.24207	3.18825	6.28875	4.08564	3.68672	1.88628	1.37986	1.96218	3.87035	2.51446	2.26895	-0.726982	0.137025	1	-	-	-	+	+	+	Intron (XM_006560315.3/100577222, intron 1 of 2)	6696758	6716981	20224	2	100577222	#NAME?	3981	.
NC_037640.1	5012069	5012335	5012212;5012213;5012209	482	452	498	504	591	779	7.91637	7.30689	8.15865	8.20625	10.3363	10.2336	6.67854	6.16436	6.88293	6.92309	8.72008	8.63344	-0.299481	0.108985	1	-	-	-	+	+	+	Distal Intergenic	4970241	5008975	38735	2	100577242	#NAME?	-3094	GO:0005515::protein binding;GO:0005634::nucleus;GO:0007165::signal transduction;GO:0043565::sequence-specific DNA binding
NC_037638.1	17747529	17747811	17747648;17747685;17747679	154	178	131	271	267	314	2.54045	2.88727	2.1582	4.42	4.67928	4.1328	2.02204	2.29809	1.7178	3.51805	3.72442	3.28946	-0.802644	0.00268306	1	-	-	-	+	+	+	Intron (XM_006571083.3/100577365, intron 1 of 2)	17704373	17769291	64919	1	100577365	#NAME?	43156	GO:0003677::DNA binding;GO:0003735::structural constituent of ribosome;GO:0005622::intracellular;GO:0005840::ribosome;GO:0006355::regulation of transcription, DNA-templated;GO:0006412::translation
NC_037643.1	3941701	3941980	3941837;3941829;3941817	131	172	199	245	184	351	2.16348	2.79049	3.27	3.9975	3.2301	4.61824	1.74045	2.24486	2.63061	3.21586	2.59851	3.71522	-0.526474	0.0816818	1	-	-	-	+	+	+	Intron (XM_026441432.1/100577393, intron 1 of 10)	3804323	3960476	156154	2	100577393	#NAME?	18496	GO:0004672::protein kinase activity;GO:0004714::transmembrane receptor protein tyrosine kinase activity;GO:0005524::ATP binding;GO:0006468::protein phosphorylation;GO:0006810::transport;GO:0007169::transmembrane receptor protein tyrosine kinase signaling pathway;GO:0016020::membrane;GO:0016021::integral component of membrane;GO:0016773::phosphotransferase activity, alcohol group as acceptor;GO:00…
NC_037647.1	8372140	8372397	8372239;8372245;8372246	224	193	241	283	233	293	3.68775	3.12922	3.9567	4.615	4.08564	3.85728	3.21965	2.73201	3.45446	4.0292	3.56703	3.36766	-0.221088	0.14753	1	-	-	-	+	+	+	Intron (XM_396366.7/412914, intron 2 of 11)	8358468	8361702	3235	2	100577493	#NAME?	-10438	GO:0005515::protein binding
NC_037643.1	6475241	6475461	6475352;6475345;6475356	76	123	168	177	176	233	1.26203	2.00012	2.76315	2.8925	3.09042	3.07008	1.2863	2.03859	2.8163	2.94814	3.14986	3.12913	-0.587363	0.142555	1	-	-	-	+	+	+	Promoter (<=1kb)	6464125	6475391	11267	2	100577552	#NAME?	0	GO:0003723::RNA binding
NC_037647.1	9773456	9773752	9773554;9773588;9773606	701	459	551	526	601	709	11.5058	7.4198	9.0252	8.56375	10.5109	9.3152	8.72623	5.62733	6.8449	6.49492	7.97168	7.06484	-0.0224857	0.91883	1	-	-	-	+	+	+	Distal Intergenic	9745277	9768680	23404	2	100577603	#NAME?	-4776	GO:0003677::DNA binding;GO:0003700::sequence-specific DNA binding transcription factor activity;GO:0004564::beta-fructofuranosidase activity;GO:0004575::sucrose alpha-glucosidase activity;GO:0005198::structural molecule activity;GO:0005576::extracellular region;GO:0005887::integral component of plasma membrane;GO:0006355::regulation of transcription, DNA-templated;GO:0008200::ion channel inhibito…
NC_037639.1	12726355	12726563	12726447;12726450;12726456	126	102	122	176	160	200	2.08153	1.66139	2.01105	2.87625	2.81106	2.63712	2.24338	1.79057	2.16742	3.09989	3.02964	2.84217	-0.532794	0.00934388	1	-	-	-	+	+	+	Promoter (<=1kb)	12683801	12726529	42729	2	100577635	#NAME?	0	GO:0004197::cysteine-type endopeptidase activity;GO:0004930::G-protein coupled receptor activity;GO:0007606::sensory perception of chemical stimulus;GO:0016020::membrane;GO:0016021::integral component of membrane;GO:0016032::viral process;GO:0016820::hydrolase activity, acting on acid anhydrides, catalyzing transmembrane movement of substances
NC_037642.1	9885283	9885593	9885449;9885460;9885469	139	179	171	220	199	218	2.2946	2.9034	2.8122	3.59125	3.492	2.87328	1.66193	2.10287	2.03682	2.60107	2.52918	2.08106	-0.313805	0.0938119	1	-	-	-	+	+	+	Promoter (<=1kb)	9884504	9888491	3988	1	100577717	#NAME?	779	.
NC_037639.1	12520432	12520995	12520539;12520749;12520574;12520842;12520579;12520854;12520921	225	242	177	290	259	317	3.70414	3.91959	2.9103	4.72875	4.5396	4.17216	1.47936	1.56541	1.16232	1.88857	1.81303	1.66628	-0.35153	0.0673454	1	-	-	-	+	+	+	Intron (XM_026439187.1/100577751, intron 2 of 7)	12510435	12529510	19076	2	100577751	#NAME?	8515	GO:0003677::DNA binding;GO:0006355::regulation of transcription, DNA-templated;GO:0008270::zinc ion binding
NC_037647.1	7938514	7938740	7938612;7938606;7938638	149	107	133	160	149	158	2.4585	1.74204	2.1909	2.61625	2.619	2.08608	2.43956	1.72862	2.17402	2.59609	2.59882	2.07001	-0.195965	0.322763	1	-	-	-	+	+	+	Promoter (1-2kb)	7816995	7937350	120356	2	100577759	#NAME?	-1164	.
NC_037653.1	2440717	2441065	2440816;2440827;2440861	167	352	394	475	474	713	2.75352	5.69389	6.45825	7.735	8.2935	9.36768	1.77717	3.67494	4.16827	4.99231	5.35277	6.04607	-0.768751	0.0737476	1	-	-	-	+	+	+	Exon (XM_026445881.1/100577769, exon 6 of 6)	2438576	2449756	11181	2	100577769	#NAME?	8691	GO:0005622::intracellular;GO:0005634::nucleus;GO:0005737::cytoplasm;GO:0006309::apoptotic DNA fragmentation;GO:0006915::apoptotic process;GO:0016787::hydrolase activity
NC_037639.1	10770217	10770510	10770363;10770390;10770397	158	177	161	250	161	236	2.60601	2.87114	2.6487	4.07875	2.82852	3.10944	1.99662	2.19975	2.02933	3.12497	2.1671	2.38233	-0.301818	0.234691	1	-	-	-	+	+	+	Intron (XR_003304109.1/100577827, intron 2 of 3)	10765455	10807157	41703	2	100577827	#NAME?	36647	GO:0016788::hydrolase activity, acting on ester bonds;GO:0020037::heme binding
NC_037639.1	10829655	10829968	10829785;10829817;10829833	157	165	155	193	225	245	2.58962	2.67758	2.5506	3.1525	3.94596	3.22752	1.85769	1.92079	1.8297	2.26148	2.83067	2.31529	-0.401444	0.0775514	1	-	-	-	+	+	+	Distal Intergenic	10728424	10808826	80403	2	100577827	#NAME?	-20829	GO:0016788::hydrolase activity, acting on ester bonds;GO:0020037::heme binding
NC_037643.1	3708577	3708844	3708713;3708707;3708713	80	144	127	185	283	191	1.32759	2.33885	2.0928	3.0225	4.95864	2.51904	1.11582	1.96578	1.75897	2.54038	4.16768	2.11722	-0.866464	0.155833	1	-	-	-	+	+	+	Intron (XM_003249564.4/100577629, intron 1 of 8)	3698509	3699590	1082	1	100577923	#NAME?	10068	.
NC_037638.1	15361186	15361532	15361404;15361402;15361400	173	170	188	265	276	318	2.85186	2.75823	3.09015	4.3225	4.83642	4.18528	1.85125	1.79047	2.00593	2.8059	3.1395	2.71682	-0.617086	0.00644159	1	-	-	-	+	+	+	Distal Intergenic	15377092	15385439	8348	2	100577942	#NAME?	23907	GO:0003677::DNA binding;GO:0070836::caveola assembly
NC_037638.1	15366415	15366672	15366512;15366514;15366542	144	160	131	163	169	208	2.37655	2.59693	2.1582	2.665	2.9682	2.74208	2.07488	2.26729	1.88425	2.32672	2.59143	2.39402	-0.231895	0.0625183	1	-	-	-	+	+	+	Distal Intergenic	15377092	15385439	8348	2	100577942	#NAME?	18767	GO:0003677::DNA binding;GO:0070836::caveola assembly
NC_037638.1	11236226	11236465	11236340;11236341;11236351	219	146	171	205	242	329	3.6058	2.37111	2.8122	3.3475	4.24278	4.3296	3.38421	2.22539	2.63938	3.14178	3.98204	4.06353	-0.439581	0.0959998	1	-	-	-	+	+	+	Intron (XM_006569610.3/410724, intron 1 of 6)	11239810	11244666	4857	1	100578016	#NAME?	-3345	.
NC_037645.1	9104599	9104894	9104749;9104743;9104755	125	101	78	261	226	282	2.06514	1.64526	1.29165	4.2575	3.96342	3.71296	1.57154	1.25201	0.982923	3.23988	3.01609	2.8255	-1.25447	0.00170266	1	-	-	-	+	+	+	Promoter (1-2kb)	9100812	9106773	5962	2	100578055	#NAME?	1879	GO:0000123::histone acetyltransferase complex;GO:0003713::transcription coactivator activity;GO:0004402::histone acetyltransferase activity;GO:0005634::nucleus;GO:0006355::regulation of transcription, DNA-templated;GO:0007165::signal transduction;GO:0016573::histone acetylation
NC_037641.1	8752987	8753313	8753090;8753171;8753208	129	143	87	202	179	226	2.1307	2.32272	1.4388	3.29875	3.1428	2.97824	1.46771	1.59998	0.991104	2.27231	2.16489	2.05153	-0.676884	0.0369326	1	-	-	-	+	+	+	Intron (XM_003250097.4/100578248, intron 1 of 1)	8730889	8777332	46444	2	100578248	#NAME?	24019	GO:0006464::cellular protein modification process;GO:0042302::structural constituent of cuticle
NC_037641.1	8762954	8763215	8763079;8763082;8763093	163	87	131	205	170	233	2.68796	1.41944	2.1582	3.3475	2.98566	3.07008	2.31094	1.22034	1.85548	2.87797	2.56688	2.63946	-0.585705	0.0943875	1	-	-	-	+	+	+	Intron (XM_003250097.4/100578248, intron 1 of 1)	8730889	8777332	46444	2	100578248	#NAME?	14117	GO:0006464::cellular protein modification process;GO:0042302::structural constituent of cuticle
NC_037643.1	17595960	17596488	17596313;17596334;17596358	184	196	235	344	242	281	3.03215	3.17761	3.8586	5.60625	4.24278	3.69984	1.2911	1.35304	1.64301	2.38717	1.8066	1.57541	-0.428344	0.166234	1	-	-	-	+	+	+	Distal Intergenic	17528392	17530735	2344	2	100578289	#NAME?	-65225	GO:0008270::zinc ion binding;GO:0046872::metal ion binding
NC_037650.1	9280222	9280565	9280401;9280361;9280381	97	117	120	317	216	347	1.60622	1.90334	1.97835	5.1675	3.78882	4.56576	1.05175	1.24631	1.29542	3.38367	2.48092	2.98966	-1.30099	0.0157258	1	-	-	-	+	+	+	Intron (XM_016915968.2/100578423, intron 1 of 5)	9136195	9302298	166104	2	100578423	#NAME?	21733	GO:0000276::mitochondrial proton-transporting ATP synthase complex, coupling factor F(o);GO:0005515::protein binding;GO:0015078::hydrogen ion transmembrane transporter activity;GO:0015986::ATP synthesis coupled proton transport;GO:0016021::integral component of membrane
NC_037642.1	9754609	9755006	9754882;9754846;9754864	162	195	227	309	342	355	2.67157	3.16148	3.7278	5.0375	5.98878	4.67072	1.51199	1.78926	2.10977	2.85101	3.38939	2.64343	-0.715278	0.0165894	1	-	-	-	+	+	+	Promoter (<=1kb)	9750069	9754085	4017	2	100578440	#NAME?	-524	GO:0009186::deoxyribonucleoside diphosphate metabolic process;GO:0055114::oxidation-reduction process
NC_037638.1	273567	274087	273723;273753;273745	952	877	661	2261	1687	2707	15.6197	14.1621	10.8237	36.7575	29.4725	35.529	6.75307	6.12289	4.67955	15.8919	12.7422	15.3607	-1.32541	0.00302819	1	-	-	-	+	+	+	Intron (XM_026446225.1/551203, intron 30 of 53)	256975	270131	13157	2	100578621	#NAME?	-3436	GO:0005515::protein binding;GO:0007016::cytoskeletal anchoring at plasma membrane;GO:0016010::dystrophin-associated glycoprotein complex
NC_037650.1	4519525	4519823	4519660;4519648;4519725	421	582	344	455	465	690	6.91658	9.40379	5.64075	7.41	8.13636	9.06592	5.21059	7.08432	4.24944	5.5823	6.12951	6.82979	-0.164427	0.521063	1	-	-	-	+	+	+	Promoter (<=1kb)	4519659	4525246	5588	1	100578649	#NAME?	0	GO:0004675::transmembrane receptor protein serine/threonine kinase activity;GO:0016020::membrane
NC_037640.1	5598718	5598968	5598815;5598851;5598839	154	141	160	188	181	220	2.54045	2.29046	2.63235	3.07125	3.17772	2.89952	2.27984	2.05549	2.36231	2.75618	2.85173	2.60207	-0.293728	0.0140147	1	-	-	-	+	+	+	Intron (XM_026439340.1/551828, intron 2 of 15)	5629461	5635018	5558	1	100578670	#NAME?	-30493	.
NC_037640.1	5577756	5578052	5577859;5577873;5577873	213	214	242	310	223	403	3.50746	3.46795	3.97305	5.05375	3.91104	5.30048	2.66013	2.63016	3.01324	3.83287	2.96621	4.01999	-0.381779	0.109174	1	-	-	-	+	+	+	Intron (XM_026439340.1/551828, intron 2 of 15)	5629461	5635018	5558	1	100578670	#NAME?	-51409	.
NC_037639.1	5507440	5507703	5507576;5507559;5507575	112	119	102	206	158	242	1.85207	1.9356	1.68405	3.36375	2.77614	3.18816	1.58023	1.6515	1.43687	2.87003	2.36867	2.72021	-0.769581	0.00905108	1	-	-	-	+	+	+	Promoter (<=1kb)	5502188	5507986	5799	2	100578727	#NAME?	283	GO:0005515::protein binding
NC_037642.1	5569767	5570423	5569899;5569915;5570261;5569906	187	167	185	370	379	488	3.08132	2.70984	3.0411	6.02875	6.6348	6.41568	1.05642	0.929062	1.04263	2.06694	2.27473	2.1996	-1.11115	0.000219046	1	-	-	-	+	+	+	Intron (XM_016912180.2/100578810, intron 1 of 7)	5585675	5617320	31646	1	100578810	#NAME?	-15252	GO:0016021::integral component of membrane;GO:0022857::transmembrane transporter activity;GO:0055085::transmembrane transport
NC_037649.1	10915023	10915253	10915118;10915138;10915130	264	239	231	276	294	346	4.34335	3.8712	3.7932	4.50125	5.1507	4.55264	4.23525	3.77485	3.6988	4.38922	5.02251	4.43933	-0.242391	0.0556047	1	-	-	-	+	+	+	Intron (XM_016915510.2/100578818, intron 5 of 12)	10924727	10977339	52613	1	100578818	#NAME?	-9474	GO:0005272::sodium channel activity;GO:0006814::sodium ion transport;GO:0007165::signal transduction;GO:0016020::membrane
NC_037642.1	10556373	10556624	10556495;10556494;10556509	193	162	158	157	208	252	3.17966	2.62919	2.59965	2.5675	3.64914	3.31936	2.84215	2.35011	2.3237	2.29497	3.26179	2.96702	-0.181536	0.381194	1	-	-	-	+	+	+	Intron (XM_006567762.3/100578865, intron 2 of 4)	10475550	10584591	109042	2	100578865	#NAME?	27967	GO:0004190::aspartic-type endopeptidase activity;GO:0005524::ATP binding;GO:0005672::transcription factor TFIIA complex;GO:0006367::transcription initiation from RNA polymerase II promoter;GO:0016021::integral component of membrane
NC_037653.1	3223185	3223417	3223298;3223299;3223306	108	153	166	182	174	226	1.78651	2.48402	2.73045	2.97375	3.0555	2.97824	1.72709	2.40141	2.63964	2.87485	2.95388	2.87919	-0.363568	0.14045	1	-	-	-	+	+	+	Distal Intergenic	3229034	3229055	22	2	100629033	100629033	5638	.
NC_037643.1	10124555	10124851	10124680;10124749;10124726	149	140	160	231	200	219	2.4585	2.27433	2.63235	3.77	3.50946	2.8864	1.86458	1.7249	1.99643	2.85925	2.66165	2.1891	-0.46494	0.0554764	1	-	-	-	+	+	+	Intron (XM_026441525.1/724172, intron 37 of 52)	10159199	10159293	95	1	100629047	NR_039524.1	-34348	.
NC_037649.1	11365882	11366153	11366012;11366025;11366029	446	607	562	571	478	808	7.32633	9.80704	9.20505	9.295	8.36334	10.6141	6.06714	8.12149	7.62296	7.69745	6.92592	8.78984	-0.102228	0.551879	1	-	-	-	+	+	+	Intron (XM_026444481.1/726204, intron 1 of 4)	11370787	11370809	23	2	100629069	100629069	4656	.
NC_037645.1	12275708	12275926	12275811;12275814;12275817	93	292	271	241	240	440	1.54066	4.72609	4.4472	3.9325	4.20786	5.78592	1.58463	4.86099	4.57414	4.04474	4.32796	5.95107	-0.378319	0.424645	1	-	-	-	+	+	+	Intron (XM_016913577.2/412161, intron 5 of 8)	12268102	12268124	23	1	100629077	100629077	7606	.
NC_037638.1	8707827	8708057	8707928;8707935;8707947	98	210	203	255	213	278	1.62261	3.40343	3.3354	4.16	3.73644	3.66048	1.58223	3.31873	3.25239	4.05647	3.64345	3.56938	-0.466934	0.203499	1	-	-	-	+	+	+	Exon (XR_003305617.1/102653666, exon 4 of 6)	8713606	8717622	4017	1	102653639	#NAME?	-5549	.
NC_037644.1	7887519	7887829	7887663;7887638;7887650	96	167	161	249	401	338	1.58983	2.70984	2.6487	4.0625	7.01892	4.44768	1.15148	1.96268	1.9184	2.94238	5.08366	3.22136	-1.16023	0.0759125	1	-	-	-	+	+	+	Intron (XM_026441663.1/409851, intron 1 of 8)	7895937	7898475	2539	2	102653770	#NAME?	10646	.
NC_037644.1	1295041	1295476	1295160;1295165;1295187	167	162	172	230	241	274	2.75352	2.62919	2.82855	3.75375	4.22532	3.608	1.42255	1.35832	1.46132	1.9393	2.18293	1.864	-0.49684	0.0188852	1	-	-	-	+	+	+	Exon (XR_003305019.1/102653847, exon 6 of 13)	1291492	1299051	7560	2	102653847	#NAME?	3575	.
NC_037638.1	4442050	4442286	4442153;4442165;4442159	225	244	238	290	262	393	3.70414	3.95185	3.90765	4.72875	4.59198	5.16928	3.52051	3.75594	3.71393	4.49433	4.36434	4.91302	-0.325463	0.0178466	1	-	-	-	+	+	+	Promoter (1-2kb)	4440892	4444809	3918	1	102653920	#NAME?	1158	GO:0005515::protein binding;GO:0046872::metal ion binding
NC_037640.1	11709995	11710248	11710116;11710120;11710125	218	254	207	243	173	295	3.58941	4.11315	3.4008	3.965	3.03804	3.88352	3.18314	3.6476	3.01588	3.51622	2.69418	3.44396	0.0284482	0.853632	1	-	-	-	+	+	+	3' UTR	11702622	11703661	1040	2	102653938	#NAME?	-6334	.
NC_037648.1	2215782	2216042	2215912;2215927;2215927	103	160	145	199	183	260	1.70456	2.59693	2.3871	3.25	3.21264	3.42432	1.47109	2.24123	2.06014	2.80485	2.77261	2.95529	-0.563825	0.0513748	1	-	-	-	+	+	+	Promoter (2-3kb)	2216855	2218468	1614	2	102654106	#NAME?	2426	.
NC_037652.1	9228114	9228374	9228236;9228252;9228272	149	105	83	165	154	227	2.4585	1.70978	1.3734	2.6975	2.7063	2.99136	2.12176	1.47559	1.18529	2.32802	2.33562	2.58163	-0.599234	0.0868254	1	-	-	-	+	+	+	Distal Intergenic	9265803	9269594	3792	1	102654248	#NAME?	-37429	.
NC_037638.1	12769448	12769696	12769562;12769570;12769576	131	152	142	205	194	229	2.16348	2.46789	2.33805	3.3475	3.4047	3.0176	1.95713	2.23251	2.11505	3.02822	3.07997	2.72979	-0.48729	0.00446807	1	-	-	-	+	+	+	Intron (XM_026445379.1/410718, intron 3 of 22)	12787319	12794941	7623	1	102654265	#NAME?	-17623	.
NC_037638.1	12777726	12778004	12777831;12777835;12777834	152	109	166	161	185	205	2.50767	1.7743	2.73045	2.6325	3.24756	2.70272	2.02457	1.43248	2.20443	2.12535	2.62192	2.18204	-0.291533	0.216891	1	-	-	-	+	+	+	Intron (XM_026445379.1/410718, intron 3 of 22)	12787319	12794941	7623	1	102654265	#NAME?	-9315	.
NC_037645.1	8547210	8547415	8547308;8547312;8547311	184	254	341	429	365	480	3.03215	4.11315	5.5917	6.9875	6.39036	6.31072	3.31551	4.49753	6.11425	7.64049	6.98754	6.90046	-0.628334	0.0791632	1	-	-	-	+	+	+	Intron (XM_016913617.2/551663, intron 20 of 24)	8549935	8553307	3373	2	102654385	#NAME?	5892	.
NC_037638.1	12680893	12681124	12680998;12681007;12681008	188	154	142	246	199	276	3.09771	2.50015	2.33805	4.01375	3.492	3.63424	3.00759	2.42742	2.27003	3.89699	3.39041	3.52852	-0.48928	0.0236407	1	-	-	-	+	+	+	Intron (XM_026445379.1/410718, intron 2 of 22)	12682647	12685222	2576	2	102654418	#NAME?	4098	GO:0005576::extracellular region;GO:0009405::pathogenesis;GO:0019871::sodium channel inhibitor activity
NC_037652.1	5117487	5117834	5117582;5117577;5117736	530	478	481	479	591	607	8.70309	7.72627	7.8807	7.8	10.3363	7.97696	5.63327	5.001	5.10096	5.04873	6.6904	5.16327	-0.103229	0.54824	1	-	-	-	+	+	+	Intron (XM_026445540.1/411569, intron 2 of 16)	5124394	5127287	2894	2	102654477	#NAME?	9453	.
NC_037642.1	13423884	13424474	13424011;13424343;13424013;13424023;13424357	154	294	210	387	420	410	2.54045	4.75835	3.44985	6.305	7.35066	5.39232	0.968255	1.81357	1.31486	2.40306	2.8016	2.0552	-0.825483	0.032794	1	-	-	-	+	+	+	Promoter (<=1kb)	13423231	13424752	1522	1	102654528	#NAME?	653	.
NC_037640.1	7056401	7056748	7056528;7056534;7056647	209	175	154	199	182	300	3.4419	2.83888	2.53425	3.25	3.19518	3.94912	2.22785	1.83753	1.64035	2.10364	2.06815	2.55616	-0.237755	0.218705	1	-	-	-	+	+	+	Intron (XM_016911124.2/410044, intron 5 of 11)	7099363	7100664	1302	2	102654622	#NAME?	43916	.
NC_037651.1	10071964	10072238	10072110;10072115;10072127	276	393	348	465	569	632	4.54003	6.35522	5.70615	7.5725	9.9522	8.30496	3.71871	5.20552	4.67387	6.20259	8.15179	6.80254	-0.637724	0.0282612	1	-	-	-	+	+	+	Promoter (1-2kb)	10066966	10070482	3517	2	102654676	#NAME?	-1482	.
NC_037653.1	2244836	2245062	2244933;2244950;2244937	98	104	149	178	166	210	1.62261	1.69365	2.4525	2.90875	2.91582	2.76832	1.61011	1.6806	2.4336	2.88634	2.89335	2.74699	-0.574882	0.0668721	1	-	-	-	+	+	+	Intron (XM_026445879.1/724468, intron 2 of 11)	2237585	2238757	1173	1	102654852	#NAME?	7251	.
NC_037641.1	5359577	5359850	5359695;5359678;5359701	115	149	111	215	175	262	1.90124	2.4195	1.8312	3.51	3.07296	3.45056	1.56298	1.98903	1.5054	2.88551	2.52623	2.83665	-0.705714	0.00633164	1	-	-	-	+	+	+	Intron (XR_001702671.2/107964268, intron 2 of 3)	5364857	5369438	4582	1	102654974	#NAME?	-5007	.
NC_037652.1	3553122	3553453	3553297;3553293;3553312	118	127	146	238	280	275	1.95041	2.06464	2.40345	3.88375	4.90626	3.62112	1.32329	1.40079	1.63066	2.63499	3.32873	2.45681	-0.951326	0.0261658	1	-	-	-	+	+	+	Intron (XM_394109.6/410632, intron 1 of 6)	3555362	3559179	3818	2	102655028	#NAME?	5726	GO:0005096::GTPase activator activity
NC_037638.1	6336780	6337053	6336920;6336920;6336918	122	177	154	255	249	490	2.01597	2.87114	2.53425	4.16	4.365	6.44192	1.6573	2.36032	2.08337	3.41987	3.58839	5.2958	-1.01202	0.0621287	1	-	-	-	+	+	+	Promoter (<=1kb)	6333164	6337094	3931	2	102655032	#NAME?	41	.
NC_037639.1	14697229	14697472	14697340;14697339;14697349	158	152	152	199	150	188	2.60601	2.46789	2.50155	3.25	2.63646	2.47968	2.40576	2.27826	2.30933	3.00027	2.43387	2.28914	-0.143231	0.378764	1	-	-	-	+	+	+	Exon (XM_016918128.2/408677, exon 6 of 6)	14704493	14707721	3229	1	102655088	#NAME?	-7021	GO:0006275::regulation of DNA replication
NC_037641.1	5325372	5325670	5325511;5325520;5325526	39	82	116	240	252	211	0.6556	1.33879	1.91295	3.91625	4.41738	2.78144	0.493895	1.00857	1.44112	2.9503	3.32782	2.09539	-1.50826	0.0191207	1	-	-	-	+	+	+	Promoter (2-3kb)	5327263	5328619	1357	2	102655144	#NAME?	2949	.
NC_037638.1	27112279	27112558	27112400;27112446;27112443	117	134	152	245	205	315	1.93402	2.17755	2.50155	3.9975	3.59676	4.14592	1.55586	1.75177	2.01242	3.21586	2.89348	3.33526	-0.828052	0.00181566	1	-	-	-	+	+	+	Promoter (1-2kb)	27110304	27113141	2838	1	102655202	#NAME?	1975	GO:0006032::chitin catabolic process;GO:0008061::chitin binding
NC_037640.1	4884422	4884672	4884545;4884529;4884555	139	139	138	240	150	261	2.2946	2.2582	2.27265	3.91625	2.63646	3.43744	2.05921	2.02654	2.03951	3.5145	2.366	3.08481	-0.549582	0.105628	1	-	-	-	+	+	+	Promoter (1-2kb)	4886479	4888443	1965	1	102655237	#NAME?	-1807	.
NC_037649.1	9305596	9305892	9305728;9305730;9305770	159	179	143	265	171	351	2.6224	2.9034	2.3544	4.3225	3.00312	4.61824	1.98888	2.202	1.78563	3.27827	2.27763	3.50257	-0.599965	0.100926	1	-	-	-	+	+	+	Promoter (<=1kb)	9304876	9315214	10339	1	102655436	#NAME?	720	GO:0000796::condensin complex;GO:0003677::DNA binding;GO:0003700::sequence-specific DNA binding transcription factor activity;GO:0004252::serine-type endopeptidase activity;GO:0005219::ryanodine-sensitive calcium-release channel activity;GO:0005576::extracellular region;GO:0005634::nucleus;GO:0005886::plasma membrane;GO:0005944::phosphatidylinositol 3-kinase complex, class IB;GO:0006270::DNA repl…
NC_037652.1	8694623	8695093	8694698;8694984;8694719;8694695;8694958	132	206	213	343	393	392	2.17987	3.33891	3.4989	5.59	6.87924	5.15616	1.0425	1.5968	1.67331	2.67336	3.28993	2.46588	-0.966828	0.0137063	1	-	-	-	+	+	+	Promoter (2-3kb)	8692199	8705646	13448	1	102655477	#NAME?	2424	GO:0005634::nucleus;GO:0005739::mitochondrion;GO:0045333::cellular respiration
NC_037645.1	6946795	6947059	6946912;6946926;6946935	164	163	104	176	178	224	2.70435	2.64532	1.71675	2.87625	3.12534	2.952	2.29871	2.24853	1.45924	2.44482	2.65655	2.50921	-0.341487	0.182999	1	-	-	-	+	+	+	Distal Intergenic	6952704	6961029	8326	1	102655491	#NAME?	-5645	.
NC_037642.1	2238802	2239045	2238905;2238912;2238918	1412	1299	1335	1353	1479	2046	23.1591	20.969	21.8436	22.0025	25.8408	26.8566	21.3795	19.3577	20.1651	20.3118	23.8552	24.7929	-0.179259	0.177845	1	-	-	-	+	+	+	Promoter (<=1kb)	2024630	2238194	213565	2	102655600	#NAME?	-608	GO:0004857::enzyme inhibitor activity;GO:0006811::ion transport;GO:0016020::membrane;GO:0019054::modulation by virus of host process
NC_037638.1	1950845	1951067	1950951;1950963;1950960	101	91	119	165	170	245	1.67178	1.48396	1.962	2.6975	2.98566	3.22752	1.68865	1.49894	1.9818	2.72473	3.0158	3.2601	-0.800029	0.00374138	1	-	-	-	+	+	+	Promoter (<=1kb)	1948753	1951575	2823	2	102655747	#NAME?	508	GO:0016021::integral component of membrane
NC_037643.1	14772746	14773008	14772877;14772893;14772895	156	106	145	186	190	220	2.57323	1.72591	2.3871	3.03875	3.33486	2.89952	2.20389	1.47819	2.04447	2.60259	2.8562	2.48334	-0.471861	0.0591632	1	-	-	-	+	+	+	Promoter (2-3kb)	14770375	14775572	5198	1	102655757	#NAME?	2371	.
NC_037644.1	12200622	12200932	12200674;12200859;12200853	103	120	156	177	160	210	1.70456	1.95173	2.56695	2.8925	2.81106	2.76832	1.23458	1.4136	1.85919	2.09498	2.03599	2.00504	-0.445016	0.0969756	1	-	-	-	+	+	+	Promoter (2-3kb)	12194226	12198294	4069	2	102655868	#NAME?	-2328	GO:0005515::protein binding
NC_037653.1	4755726	4755972	4755839;4755844;4755853	133	116	139	221	158	220	2.19626	1.88721	2.289	3.6075	2.77614	2.89952	2.00287	1.72104	2.08745	3.28985	2.53169	2.64421	-0.542763	0.0464198	1	-	-	-	+	+	+	Promoter (2-3kb)	4752061	4758150	6090	2	102655928	#NAME?	2178	GO:0016021::integral component of membrane
NC_037643.1	17424204	17424663	17424474;17424457;17424463	209	172	195	324	303	256	3.4419	2.79049	3.2046	5.28125	5.30784	3.37184	1.68542	1.36644	1.56922	2.5861	2.59912	1.65111	-0.564996	0.133663	1	-	-	-	+	+	+	Distal Intergenic	17501297	17506052	4756	2	102656082	#NAME?	81389	GO:0003777::microtubule motor activity;GO:0005524::ATP binding;GO:0005737::cytoplasm;GO:0007018::microtubule-based movement;GO:0008017::microtubule binding;GO:0008092::cytoskeletal protein binding;GO:0019898::extrinsic component of membrane
NC_037647.1	9677098	9677534	9677248;9677212;9677311	166	155	163	273	241	238	2.73713	2.51628	2.6814	4.4525	4.22532	3.13568	1.41085	1.29701	1.38212	2.29503	2.17793	1.61628	-0.574169	0.0825607	1	-	-	-	+	+	+	Distal Intergenic	9544635	9593823	49189	2	102656106	#NAME?	-83275	GO:0000287::magnesium ion binding;GO:0005524::ATP binding;GO:0006188::IMP biosynthetic process;GO:0016021::integral component of membrane;GO:0016879::ligase activity, forming carbon-nitrogen bonds
NC_037651.1	7135381	7135690	7135575;7135574;7135586	477	718	634	774	742	967	7.83442	11.5975	10.3822	12.5938	12.9728	12.7002	5.69261	8.42693	7.54387	9.15085	9.42624	9.22817	-0.360098	0.124763	1	-	-	-	+	+	+	Intron (XM_016916252.2/408455, intron 5 of 5)	7095602	7097708	2107	2	102656201	#NAME?	-37673	GO:0003676::nucleic acid binding
NC_037640.1	13047434	13047662	13047545;13047544;13047548	160	157	161	201	173	239	2.63879	2.54854	2.6487	3.2825	3.03804	3.1488	2.59559	2.50682	2.60534	3.22876	2.9883	3.09725	-0.273141	0.00756648	1	-	-	-	+	+	+	Intron (XM_006569213.3/413503, intron 5 of 7)	13050879	13053953	3075	2	102656234	#NAME?	6291	GO:0003333::amino acid transmembrane transport;GO:0016866::intramolecular transferase activity;GO:0030244::cellulose biosynthetic process
NC_037649.1	9106081	9106542	9106277;9106278;9106286	35	98	94	423	321	428	0.59004	1.59687	1.55325	6.89	5.62212	5.62848	0.287678	0.778564	0.757296	3.35926	2.7411	2.7442	-2.27805	0.00110717	1	-	-	-	+	+	+	Intron (XM_006566963.3/410386, intron 1 of 14)	9084165	9086959	2795	1	102656500	#NAME?	21916	.
NC_037652.1	4611291	4611564	4611432;4611469;4611458	152	68	135	174	158	199	2.50767	1.11297	2.2236	2.84375	2.77614	2.624	2.06151	0.914954	1.82798	2.3378	2.28222	2.15715	-0.49631	0.198574	1	-	-	-	+	+	+	Promoter (<=1kb)	4612494	4615005	2512	1	102656509	#NAME?	-930	.
NC_037652.1	7654048	7654581	7654257;7654267;7654278	399	354	357	579	665	853	6.556	5.72615	5.8533	9.425	11.6284	11.2045	2.76544	2.41539	2.46903	3.97564	4.90507	4.72626	-0.83084	0.0115867	1	-	-	-	+	+	+	Exon (XM_006563549.3/410585, exon 6 of 16)	7661595	7663003	1409	1	102656552	#NAME?	-7014	GO:0005179::hormone activity
NC_037641.1	7599331	7599865	7599446;7599710;7599466;7599717;7599693	259	335	276	577	603	872	4.2614	5.41968	4.52895	9.3925	10.5458	11.4538	1.79418	2.28185	1.90682	3.95452	4.44009	4.82239	-1.14349	0.00277933	1	-	-	-	+	+	+	Promoter (2-3kb)	7600433	7602520	2088	2	102656583	#NAME?	2655	.
NC_037639.1	14358291	14358800	14358389;14358612;14358589;14358565	249	216	214	309	317	304	4.0975	3.50021	3.51525	5.0375	5.55228	4.0016	1.80974	1.54593	1.55257	2.2249	2.45227	1.76738	-0.392873	0.110705	1	-	-	-	+	+	+	Intron (XM_016918099.2/102656585, intron 1 of 6)	14301106	14351977	50872	2	102656585	#NAME?	-6314	GO:0006950::response to stress;GO:0009415::response to water;GO:0016021::integral component of membrane
NC_037639.1	14343447	14343702	14343591;14343586;14343587	133	151	137	175	175	213	2.19626	2.45176	2.2563	2.86	3.07296	2.80768	1.93246	2.15727	1.98529	2.51647	2.70386	2.47044	-0.34024	0.00548111	1	-	-	-	+	+	+	Intron (XM_016918100.2/102656585, intron 1 of 5)	14301106	14351977	50872	2	102656585	#NAME?	8275	GO:0006950::response to stress;GO:0009415::response to water;GO:0016021::integral component of membrane
NC_037653.1	3200733	3201032	3200881;3200893;3200881	171	157	165	218	235	203	2.81908	2.54854	2.7141	3.55875	4.12056	2.67648	2.11667	1.91354	2.03784	2.67204	3.09387	2.0096	-0.357703	0.209961	1	-	-	-	+	+	+	Distal Intergenic	3192832	3194635	1804	2	102656603	#NAME?	-6098	.
NC_037639.1	11007150	11007401	11007273;11007270;11007278	98	145	142	179	169	238	1.62261	2.35498	2.33805	2.925	2.9682	3.13568	1.45037	2.10501	2.08987	2.61452	2.65313	2.80284	-0.515618	0.0560682	1	-	-	-	+	+	+	Intron (XM_026439041.1/100577255, intron 1 of 2)	10986767	10989283	2517	1	102656630	#NAME?	20383	.
NC_037644.1	3664398	3664682	3664525;3664639;3664575	184	162	144	225	214	189	3.03215	2.62919	2.37075	3.6725	3.7539	2.4928	2.39647	2.07799	1.87373	2.90257	2.96691	1.97019	-0.304448	0.261579	1	-	-	-	+	+	+	5' UTR	3654247	3659414	5168	2	102656658	#NAME?	-4984	.
NC_037643.1	11968221	11968475	11968352;11968371;11968372	134	150	149	208	163	202	2.21265	2.43563	2.4525	3.39625	2.86344	2.66336	1.95452	2.15148	2.16638	3.00003	2.52938	2.35264	-0.329559	0.0958564	1	-	-	-	+	+	+	Promoter (2-3kb)	11967228	11970636	3409	2	102656698	#NAME?	2161	GO:0043231::intracellular membrane-bounded organelle;GO:0051537::2 iron, 2 sulfur cluster binding
NC_037647.1	10672087	10672399	10672221;10672202;10672237	160	147	176	200	248	323	2.63879	2.38724	2.89395	3.26625	4.34754	4.25088	1.89901	1.71798	2.08264	2.35056	3.12871	3.05915	-0.583103	0.0465072	1	-	-	-	+	+	+	Promoter (<=1kb)	10672403	10674934	2532	1	102656724	#NAME?	-4	.
NC_037648.1	2559249	2559499	2559371;2559372;2559378	250	303	270	438	407	609	4.11389	4.90352	4.43085	7.13375	7.12368	8.0032	3.69186	4.40049	3.97631	6.40193	6.39289	7.18218	-0.727075	0.00171655	1	-	-	-	+	+	+	Promoter (2-3kb)	2556287	2562003	5717	2	102656737	#NAME?	2504	.
NC_037641.1	550843	551102	550971;550986;550991	168	158	162	195	191	224	2.76991	2.56467	2.66505	3.185	3.35232	2.952	2.39971	2.2219	2.30886	2.75932	2.90428	2.55746	-0.246371	0.0322367	1	-	-	-	+	+	+	Distal Intergenic	545324	545983	660	2	102656821	#NAME?	-4860	GO:0005742::mitochondrial outer membrane translocase complex;GO:0045040::protein import into mitochondrial outer membrane
NC_037653.1	3650170	3650447	3650317;3650322;3650309	384	499	490	502	648	818	6.31015	8.065	8.02785	8.17375	11.3315	10.7453	5.11283	6.53471	6.50461	6.62282	9.1814	8.70643	-0.433269	0.0963271	1	-	-	-	+	+	+	Distal Intergenic	3645046	3645125	80	2	104794315	NR_127304.1	-5045	.
NC_037640.1	9103320	9103586	9103417;9103454;9103440	144	124	153	152	171	198	2.37655	2.01625	2.5179	2.48625	3.00312	2.61088	2.00494	1.70098	2.12419	2.09749	2.53354	2.20263	-0.229135	0.140094	1	-	-	-	+	+	+	Intron (XM_006563995.3/408740, intron 5 of 14)	9115038	9115117	80	1	104794354	NR_130408.1	-11452	.
NC_037640.1	9108093	9108413	9108205;9108206;9108312	178	155	142	218	176	223	2.93381	2.51628	2.33805	3.55875	3.09042	2.93888	2.0587	1.76571	1.64065	2.49723	2.1686	2.06226	-0.299959	0.0799423	1	-	-	-	+	+	+	Intron (XM_006563995.3/408740, intron 5 of 14)	9115038	9115117	80	1	104794354	NR_130408.1	-6625	.
NC_037645.1	850653	850939	850798;850804;850803	257	181	206	288	224	412	4.22862	2.93566	3.38445	4.69625	3.9285	5.41856	3.31882	2.30404	2.65627	3.68583	3.08327	4.25274	-0.412814	0.113115	1	-	-	-	+	+	+	Intron (XM_006558217.3/411238, intron 5 of 8)	843991	844066	76	2	104796632	NR_127364.1	-6587	.
NC_037641.1	6486943	6487267	6487078;6487093;6487131	214	232	241	246	287	430	3.52385	3.75829	3.9567	4.01375	5.02848	5.65472	2.44231	2.60479	2.74231	2.78185	3.48514	3.91917	-0.387024	0.129652	1	-	-	-	+	+	+	Promoter (1-2kb)	6485331	6485406	76	2	104796633	NR_130409.1	-1537	.
NC_037649.1	9758788	9759089	9758948;9758930;9758976	163	159	165	231	170	247	2.68796	2.5808	2.7141	3.77	2.98566	3.25376	2.00485	1.92493	2.02435	2.81191	2.2269	2.42686	-0.326381	0.094863	1	-	-	-	+	+	+	Intron (XM_026444405.1/552397, intron 3 of 4)	9713500	9713900	401	1	107963967	#NAME?	45288	GO:0005515::protein binding;GO:0030414::peptidase inhibitor activity
NC_037638.1	1634634	1635035	1634743;1635025;1634865	187	206	172	219	205	221	3.08132	3.33891	2.82855	3.575	3.59676	2.91264	1.72654	1.87088	1.58491	2.00316	2.01536	1.63203	-0.12479	0.366703	1	-	-	-	+	+	+	Promoter (2-3kb)	1629816	1631885	2070	2	107963981	#NAME?	-2749	.
NC_037638.1	23773588	23773896	23773718;23773744;23773758	182	111	162	196	192	226	2.99937	1.80656	2.66505	3.20125	3.36978	2.97824	2.18644	1.31692	1.94273	2.33361	2.45646	2.17104	-0.354093	0.182573	1	-	-	-	+	+	+	Promoter (<=1kb)	23774646	23798445	23800	1	107963993	#NAME?	-750	GO:0016787::hydrolase activity
NC_037652.1	6967178	6967436	6967300;6967311;6967316	152	127	127	219	184	248	2.50767	2.06464	2.0928	3.575	3.2301	3.26688	2.18091	1.79561	1.8201	3.10916	2.8092	2.84119	-0.595647	0.00404822	1	-	-	-	+	+	+	Promoter (<=1kb)	6964546	6966223	1678	2	107963999	#NAME?	-955	GO:0004984::olfactory receptor activity;GO:0005549::odorant binding;GO:0005789::endoplasmic reticulum membrane;GO:0007608::sensory perception of smell;GO:0016020::membrane
NC_037640.1	11730682	11730920	11730782;11730789;11730792	120	286	326	315	326	508	1.98319	4.62931	5.34645	5.135	5.70942	6.67808	1.8691	4.363	5.03888	4.8396	5.38097	6.29391	-0.551118	0.203869	1	-	-	-	+	+	+	Promoter (1-2kb)	11732545	11732868	324	2	107964140	#NAME?	1948	.
NC_037640.1	12568253	12568522	12568366;12568385;12568372	144	247	309	219	261	231	2.37655	4.00024	5.0685	3.575	4.57452	3.04384	1.98267	3.33725	4.22846	2.98249	3.81635	2.53936	0.0321109	0.931379	1	-	-	-	+	+	+	Intron (XM_016911451.2/413817, intron 1 of 4)	12561662	12562433	772	1	107964219	#NAME?	6591	.
NC_037641.1	10003270	10004055	10003553;10003672;10003935	372	399	410	718	499	555	6.11347	6.452	6.71985	11.6837	8.73	7.29472	1.75199	1.84901	1.92577	3.3483	2.50183	2.09051	-0.522821	0.159603	1	-	-	-	+	+	+	Exon (XR_003304607.1/409051, exon 34 of 39)	10016654	10017675	1022	1	107964281	#NAME?	-12599	.
NC_037641.1	7775553	7776003	7775677;7775893;7775669;7775670	205	174	212	281	231	273	3.37634	2.82275	3.48255	4.5825	4.05072	3.59488	1.68631	1.40982	1.73935	2.28872	2.02312	1.79545	-0.336877	0.0795673	1	-	-	-	+	+	+	Intron (XM_026440188.1/100578579, intron 2 of 12)	7696988	7722232	25245	2	107964300	#NAME?	-53321	.
NC_037642.1	10364010	10364219	10364110;10364118;10364120	308	436	444	373	454	572	5.06451	7.04881	7.27575	6.0775	7.9443	7.51776	5.43231	7.56072	7.80414	6.51887	8.52124	8.06372	-0.151745	0.472831	1	-	-	-	+	+	+	Intron (XM_006567774.3/408844, intron 2 of 3)	10368499	10374565	6067	1	107964408	#NAME?	-4280	GO:0015232::heme transporter activity;GO:0015886::heme transport
NC_037642.1	7230966	7231297	7231154;7231155;7231155	143	140	109	207	174	201	2.36016	2.27433	1.7985	3.38	3.0555	2.65024	1.60129	1.54306	1.22022	2.29322	2.07305	1.7981	-0.498115	0.0336827	1	-	-	-	+	+	+	3' UTR	7237734	7239631	1898	1	107964513	#NAME?	-6437	.
NC_037643.1	8793403	8793900	8793579;8793555;8793620	186	127	153	335	260	469	3.06493	2.06464	2.5179	5.46	4.55706	6.1664	1.3863	0.933859	1.13887	2.46962	2.06121	2.78913	-1.08147	0.0105671	1	-	-	-	+	+	+	Intron (XM_006565385.3/408887, intron 9 of 16)	8796981	8798294	1314	1	107964598	#NAME?	-3081	.
NC_037643.1	3977510	3977860	3977651;3977640;3977710	181	182	181	189	201	316	2.98298	2.95179	2.9757	3.0875	3.52692	4.15904	1.9143	1.89428	1.90963	1.98137	2.26337	2.66902	-0.273908	0.183826	1	-	-	-	+	+	+	Intron (XM_016912697.2/413005, intron 1 of 6)	3980278	3987247	6970	2	107964610	#NAME?	9387	.
NC_037643.1	13969928	13970154	13970041;13970034;13970052	195	169	234	238	230	295	3.21244	2.7421	3.84225	3.88375	4.03326	3.88352	3.18769	2.72097	3.81264	3.85382	4.00218	3.8536	-0.268471	0.168249	1	-	-	-	+	+	+	Intron (XM_026441174.1/102656661, intron 3 of 5)	13991253	13992728	1476	2	107964651	#NAME?	22574	.
NC_037644.1	10913060	10913309	10913188;10913195;10913198	120	136	174	181	173	233	1.98319	2.20981	2.86125	2.9575	3.03804	3.07008	1.78686	1.99105	2.578	2.66472	2.73728	2.76615	-0.361913	0.123467	1	-	-	-	+	+	+	Promoter (2-3kb)	10911310	10915804	4495	2	107964771	#NAME?	2495	.
NC_037645.1	9700249	9700601	9700409;9700433;9700443	300	488	358	854	1044	1212	4.93339	7.88757	5.86965	13.8938	18.2457	15.9146	3.14802	5.03309	3.74545	8.8657	11.6427	10.1552	-1.36235	0.00451459	1	-	-	-	+	+	+	Intron (XM_016913298.2/406084, intron 2 of 5)	9655389	9687178	31790	2	107964817	#NAME?	-13071	.
NC_037645.1	11860755	11861133	11860903;11860921;11860933	50	241	147	281	275	450	0.83589	3.90346	2.4198	4.5825	4.81896	5.91712	0.496794	2.31994	1.43816	2.72351	2.86405	3.51672	-1.09742	0.0735811	1	-	-	-	+	+	+	Promoter (<=1kb)	11861933	11864248	2316	1	107964857	#NAME?	-800	.
NC_037645.1	7861768	7862203	7861879;7862107;7862115;7861939	165	173	236	270	241	302	2.72074	2.80662	3.87495	4.40375	4.22532	3.97536	1.40562	1.44999	2.00192	2.27511	2.18293	2.05379	-0.422844	0.0904526	1	-	-	-	+	+	+	Distal Intergenic	7855665	7860968	5304	1	107964914	#NAME?	6103	.
NC_037647.1	2888179	2888545	2888296;2888314;2888339	156	171	168	218	209	290	2.57323	2.77436	2.76315	3.55875	3.6666	3.81792	1.57935	1.7028	1.69592	2.18423	2.25042	2.3433	-0.445262	0.000663689	1	-	-	-	+	+	+	Intron (XM_016914448.2/107965072, intron 1 of 2)	2855929	2893497	37569	2	107965072	#NAME?	4952	.
NC_037647.1	6524214	6524766	6524318;6524640;6524304;6524339;6524600	124	139	136	342	239	451	2.04875	2.2582	2.23995	5.57375	4.1904	5.93024	0.834508	0.919822	0.912388	2.27033	1.70686	2.41554	-1.26137	0.0273773	1	-	-	-	+	+	+	Distal Intergenic	6513742	6517461	3720	1	107965117	#NAME?	10472	GO:0034597::phosphatidylinositol-4,5-bisphosphate 4-phosphatase activity;GO:0046856::phosphatidylinositol dephosphorylation
NC_037648.1	14102457	14102754	14102632;14102618;14102629	194	222	241	340	271	362	3.19605	3.59699	3.9567	5.54125	4.74912	4.76256	2.41582	2.71888	2.99077	4.18849	3.58974	3.5999	-0.485743	0.0146145	1	-	-	-	+	+	+	Promoter (2-3kb)	14099941	14103139	3199	1	107965165	#NAME?	2516	.
NC_037648.1	1494729	1495090	1494871;1494895;1494916	127	246	232	343	492	450	2.09792	3.98411	3.80955	5.59	8.60778	5.91712	1.30541	2.47907	2.37045	3.47832	5.35611	3.68187	-1.02399	0.0490201	1	-	-	-	+	+	+	Promoter (2-3kb)	1498019	1502769	4751	1	107965237	#NAME?	-2929	GO:0009607::response to biotic stimulus;GO:0016021::integral component of membrane;GO:0016817::hydrolase activity, acting on acid anhydrides
NC_037648.1	2860462	2860715	2860581;2860579;2860575	856	945	956	1185	1011	1727	14.0462	15.259	15.647	19.2725	17.6695	22.6714	12.4564	13.5319	13.876	17.0911	15.6696	20.1053	-0.407245	0.0683408	1	-	-	-	+	+	+	Exon (XR_001705064.2/107965276, exon 2 of 2)	2854381	2860815	6435	1	107965276	#NAME?	6081	.
NC_037649.1	10790999	10791261	10791149;10791195;10791191	563	482	455	467	482	671	9.24396	7.79079	7.4556	7.605	8.43318	8.81664	7.91715	6.67256	6.38548	6.51343	7.22274	7.55116	-0.0213123	0.863274	1	-	-	-	+	+	+	Intron (XM_026444172.1/410398, intron 1 of 6)	10798309	10800343	2035	1	107965318	#NAME?	-7048	.
NC_037651.1	8179919	8180168	8180035;8180040;8180045	147	197	193	322	283	414	2.42572	3.19374	3.1719	5.24875	4.95864	5.4448	2.18558	2.87757	2.85789	4.72914	4.46775	4.90578	-0.832206	0.00357281	1	-	-	-	+	+	+	Exon (XM_016916072.2/724594, exon 3 of 4)	8195713	8196894	1182	1	107965486	#NAME?	-15545	GO:0004674::protein serine/threonine kinase activity;GO:0015948::methanogenesis
NC_037651.1	4718106	4718353	4718217;4718228;4718239	69	130	144	176	156	256	1.1473	2.11303	2.37075	2.87625	2.74122	3.37184	1.04206	1.9192	2.15328	2.61241	2.48977	3.06254	-0.674799	0.0757664	1	-	-	-	+	+	+	Intron (XM_393963.6/410484, intron 7 of 9)	4678331	4707408	29078	2	107965489	#NAME?	-10698	GO:0003700::sequence-specific DNA binding transcription factor activity;GO:0006355::regulation of transcription, DNA-templated;GO:0019402::galactitol metabolic process;GO:0042025::host cell nucleus
NC_037652.1	5243219	5243478	5243320;5243336;5243359	130	117	141	188	170	206	2.14709	1.90334	2.3217	3.07125	2.98566	2.71584	1.86013	1.64896	2.0114	2.66078	2.58663	2.35287	-0.461253	0.00810227	1	-	-	-	+	+	+	Intron (XM_006561038.3/409674, intron 5 of 6)	5235160	5237152	1993	2	107965560	107965560	-6067	.
NC_037652.1	5682423	5682718	5682573;5682580;5682571	143	141	161	236	234	399	2.36016	2.29046	2.6487	3.85125	4.1031	5.248	1.79604	1.743	2.01561	2.93073	3.12239	3.99364	-0.854961	0.0376159	1	-	-	-	+	+	+	Promoter (2-3kb)	5682155	5685261	3107	2	107965565	#NAME?	2543	.
NC_037652.1	5683079	5683381	5683217;5683226;5683209	104	161	142	259	266	425	1.72095	2.61306	2.33805	4.225	4.66182	5.58912	1.27936	1.94255	1.73811	3.14087	3.46561	4.15496	-1.11745	0.00854182	1	-	-	-	+	+	+	Promoter (1-2kb)	5682155	5685261	3107	2	107965565	#NAME?	1880	.
NC_037652.1	5683708	5684001	5683818;5683829;5683862	67	93	93	245	218	303	1.11452	1.51622	1.5369	3.9975	3.82374	3.98848	0.8539	1.16167	1.17751	3.06272	2.92959	3.05581	-1.50267	0.000853627	1	-	-	-	+	+	+	Promoter (1-2kb)	5682155	5685261	3107	2	107965565	#NAME?	1260	.
NC_037652.1	5550171	5550450	5550277;5550290;5550318	170	145	128	221	204	246	2.80269	2.35498	2.10915	3.6075	3.5793	3.24064	2.25467	1.8945	1.69674	2.90212	2.87943	2.60699	-0.520989	0.0178401	1	-	-	-	+	+	+	Promoter (1-2kb)	5548519	5554218	5700	1	107965567	#NAME?	1652	GO:0004071::aspartate-ammonia ligase activity;GO:0005737::cytoplasm;GO:0006529::asparagine biosynthetic process;GO:0007059::chromosome segregation;GO:0034508::centromere complex assembly
NC_037652.1	4745645	4745947	4745783;4745770;4745773	103	110	122	303	248	460	1.70456	1.79043	2.01105	4.94	4.34754	6.04832	1.26717	1.33101	1.49502	3.67241	3.23197	4.49633	-1.47782	0.0195801	1	-	-	-	+	+	+	Intron (XR_003306119.1/107965582, intron 1 of 1)	4736168	4742342	6175	2	107965583	#NAME?	-3303	.
NC_037652.1	1240634	1240960	1240781;1240787;1240776	92	154	126	267	198	295	1.52427	2.50015	2.07645	4.355	3.47454	3.88352	1.04998	1.7222	1.43034	2.9999	2.3934	2.67513	-0.941031	0.00814901	1	-	-	-	+	+	+	Intron (XM_026445283.1/724047, intron 4 of 8)	1307103	1310407	3305	2	107965614	#NAME?	69447	GO:0004674::protein serine/threonine kinase activity
NC_037652.1	7738605	7739035	7738654;7738923;7738664;7738924;7738919	413	592	515	785	595	1117	6.78546	9.56509	8.4366	12.7725	10.4062	14.6682	3.54624	4.99894	4.40917	6.67521	5.43853	7.66595	-0.610583	0.0502865	1	-	-	-	+	+	+	Promoter (1-2kb)	7737848	7740745	2898	2	113218519	#NAME?	1710	GO:0005515::protein binding
NC_037652.1	7739611	7739855	7739728;7739724;7739729	203	255	319	541	396	666	3.34356	4.12928	5.232	8.8075	6.93162	8.75104	3.07404	3.79642	4.81026	8.09754	6.37287	8.04563	-0.946824	0.00917241	1	-	-	-	+	+	+	Promoter (<=1kb)	7737848	7740745	2898	2	113218519	#NAME?	890	GO:0005515::protein binding
NC_037639.1	15415465	15415714	15415574;15415602;15415578	221	208	218	248	213	271	3.63858	3.37117	3.58065	4.04625	3.73644	3.56864	3.27837	3.03744	3.22618	3.64569	3.36655	3.21536	-0.100104	0.208963	1	-	-	-	+	+	+	Distal Intergenic	15431056	15435042	3987	1	113218542	#NAME?	-15342	.
NC_037647.1	8978113	8978403	8978246;8978255;8978267	151	124	164	219	208	238	2.49128	2.01625	2.69775	3.575	3.64914	3.13568	1.9284	1.56069	2.08822	2.76726	2.82465	2.4272	-0.523873	0.0166828	1	-	-	-	+	+	+	Distal Intergenic	8953285	8957575	4291	1	113218545	#NAME?	24828	GO:0000124::SAGA complex;GO:0003677::DNA binding;GO:0003712::transcription cofactor activity;GO:0003887::DNA-directed DNA polymerase activity;GO:0004190::aspartic-type endopeptidase activity;GO:0004882::androgen receptor activity;GO:0005496::steroid binding;GO:0005634::nucleus;GO:0005672::transcription factor TFIIA complex;GO:0006351::transcription, DNA-templated;GO:0006355::regulation of transcr…
NC_037642.1	6509637	6509930	6509763;6509771;6509745	146	129	156	188	190	238	2.40933	2.0969	2.56695	3.07125	3.33486	3.13568	1.84593	1.60656	1.96669	2.35307	2.55503	2.40243	-0.431901	0.0120696	1	-	-	-	+	+	+	Intron (XM_006562116.3/411079, intron 6 of 13)	6450224	6518158	67935	2	113218552	#NAME?	8228	GO:0003678::DNA helicase activity;GO:0005524::ATP binding;GO:0006260::DNA replication
NC_037639.1	11279896	11280401	11279991;11280279;11280248;11280337	449	559	395	658	465	702	7.3755	9.0328	6.4746	10.7088	8.13636	9.22336	3.28328	4.02104	2.88223	4.76713	3.62198	4.10587	-0.294683	0.177303	1	-	-	-	+	+	+	Intron (XM_003251147.4/410867, intron 1 of 7)	11244432	11266012	21581	2	113218589	#NAME?	-13884	GO:0005215::transporter activity;GO:0006810::transport;GO:0016779::nucleotidyltransferase activity
NC_037640.1	9333293	9333718	9333492;9333518;9333483	396	358	355	490	452	804	6.50683	5.79067	5.8206	7.97875	7.90938	10.5616	3.44054	3.06186	3.07769	4.21883	4.18215	5.58453	-0.545821	0.077397	1	-	-	-	+	+	+	Intron (XM_026439599.1/410933, intron 7 of 8)	9321353	9330159	8807	1	113218634	#NAME?	11940	.
NC_037641.1	12536527	12536860	12536754;12536735;12536748	654	743	808	759	680	1171	10.7354	12.0007	13.2271	12.35	11.8903	15.3766	7.24	8.09332	8.92041	8.32889	8.01886	10.37	-0.139595	0.412416	1	-	-	-	+	+	+	Intron (XM_016911798.2/409658, intron 7 of 12)	12524101	12526370	2270	2	113218732	#NAME?	-10157	.
NC_037641.1	6299081	6299313	6299193;6299195;6299198	198	458	372	562	368	536	3.26161	7.40367	6.09855	9.14875	6.44274	7.04544	3.15314	7.15744	5.89572	8.84448	6.22847	6.81112	-0.433327	0.263712	1	-	-	-	+	+	+	Intron (XM_026440483.1/100576383, intron 2 of 8)	6319326	6319540	215	2	113218754	#NAME?	20227	.
NC_037641.1	6354773	6355066	6354909;6354898;6354886	139	162	159	174	192	222	2.2946	2.62919	2.616	2.84375	3.36978	2.92576	1.75803	2.01438	2.00427	2.17877	2.58179	2.2416	-0.277558	0.0619038	1	-	-	-	+	+	+	Intron (XM_026440483.1/100576383, intron 2 of 8)	6319326	6319540	215	2	113218754	#NAME?	-35233	.
NC_037641.1	11517604	11517868	11517722;11517713;11517713	151	326	341	378	410	608	2.49128	5.27451	5.5917	6.15875	7.17606	7.99008	2.1176	4.48335	4.75296	5.23496	6.09967	6.79159	-0.674889	0.0961552	1	-	-	-	+	+	+	Promoter (<=1kb)	11518215	11518352	138	1	113218756	#NAME?	-347	.
NC_037642.1	10027425	10027945	10027611;10027638;10027618	131	220	143	650	331	709	2.16348	3.56473	2.3544	10.5788	5.79672	9.3152	0.935366	1.54119	1.01791	4.57367	2.50617	4.02736	-1.66835	0.0445944	1	-	-	-	+	+	+	Downstream (1-2kb)	10023318	10026643	3326	1	113218811	#NAME?	4107	GO:0003700::sequence-specific DNA binding transcription factor activity;GO:0005634::nucleus;GO:0006355::regulation of transcription, DNA-templated
NC_037643.1	5302329	5302729	5302527;5302552;5302564	184	152	155	378	208	525	3.03215	2.46789	2.5506	6.15875	3.64914	6.90112	1.70323	1.38627	1.43273	3.45951	2.04981	3.87652	-1.05345	0.0948805	1	-	-	-	+	+	+	Promoter (2-3kb)	5298317	5299355	1039	2	113218864	#NAME?	-2974	GO:0005515::protein binding
NC_037644.1	14134916	14135197	14135054;14135042;14135054	91	147	171	258	195	441	1.50788	2.38724	2.8122	4.20875	3.42216	5.79904	1.20444	1.90684	2.24628	3.36179	2.73349	4.63205	-1.00165	0.0646746	1	-	-	-	+	+	+	Intron (XM_026441639.1/408897, intron 8 of 13)	14043851	14069999	26149	2	113218891	#NAME?	-64917	.
NC_037644.1	14135308	14135572	14135437;14135440;14135448	102	87	125	337	223	355	1.68817	1.41944	2.0601	5.4925	3.91104	4.67072	1.43495	1.20653	1.75109	4.66864	3.3244	3.97013	-1.44546	0.0130406	1	-	-	-	+	+	+	Intron (XM_026441639.1/408897, intron 8 of 13)	14043851	14069999	26149	2	113218891	#NAME?	-65309	.
NC_037644.1	14094208	14094499	14094364;14094362;14094376	257	351	321	525	473	680	4.22862	5.67776	5.2647	8.5475	8.27604	8.93472	3.26199	4.37986	4.06123	6.5936	6.3842	6.89231	-0.763711	0.00656581	1	-	-	-	+	+	+	Intron (XM_026441639.1/408897, intron 2 of 13)	14043851	14069999	26149	2	113218891	#NAME?	-24209	.
NC_037644.1	10174714	10175003	10174831;10174867;10174885	149	170	155	181	175	244	2.4585	2.75823	2.5506	2.9575	3.07296	3.2144	1.90958	2.14239	1.98112	2.29717	2.38685	2.49671	-0.251233	0.0139377	1	-	-	-	+	+	+	Promoter (<=1kb)	10166236	10175388	9153	2	113218894	#NAME?	385	.
NC_037644.1	7288420	7288719	7288573;7288571;7288560	240	277	228	446	259	507	3.94999	4.48414	3.74415	7.26375	4.5396	6.66496	2.9658	3.36685	2.81124	5.45389	3.4085	5.00429	-0.600741	0.118266	1	-	-	-	+	+	+	Intron (XM_026441788.1/113218567, intron 3 of 3)	7333530	7334697	1168	1	113218901	#NAME?	-44811	.
NC_037646.1	3007877	3008205	3008045;3008041;3008051	150	155	169	296	163	194	2.47489	2.51628	2.7795	4.82625	2.86344	2.5584	1.69444	1.72278	1.90299	3.30431	1.96046	1.75162	-0.399244	0.364954	1	-	-	-	+	+	+	Promoter (<=1kb)	2997001	3008901	11901	2	113219006	#NAME?	696	GO:0003677::DNA binding;GO:0003918::DNA topoisomerase type II (ATP-hydrolyzing) activity;GO:0004252::serine-type endopeptidase activity;GO:0005694::chromosome;GO:0006265::DNA topological change;GO:0006508::proteolysis;GO:0008270::zinc ion binding
NC_037647.1	8787369	8787644	8787467;8787476;8787496	532	395	455	528	639	767	8.73587	6.38748	7.4556	8.59625	11.1744	10.0762	7.12957	5.21299	6.08471	7.01563	9.11972	8.22345	-0.4026	0.0749238	1	-	-	-	+	+	+	Promoter (1-2kb)	8765355	8786363	21009	2	113219038	#NAME?	-1006	GO:0001104::RNA polymerase II transcription cofactor activity;GO:0003677::DNA binding;GO:0005887::integral component of plasma membrane;GO:0006310::DNA recombination;GO:0006357::regulation of transcription from RNA polymerase II promoter;GO:0016592::mediator complex
NC_037647.1	11233331	11233755	11233435;11233716;11233437;11233444	303	271	264	427	342	408	4.98256	4.38736	4.33275	6.955	5.98878	5.36608	2.64077	2.32531	2.29637	3.68616	3.17407	2.84403	-0.418164	0.0621619	1	-	-	-	+	+	+	Promoter (<=1kb)	11233647	11237199	3553	1	113219050	#NAME?	0	.
NC_037638.1	8618542	8618837	8618692;8618690;8618703	136	133	170	270	219	287	2.24543	2.16142	2.79585	4.40375	3.8412	3.77856	1.70873	1.6448	2.12759	3.35118	2.92309	2.87542	-0.739248	0.00464118	1	-	-	-	+	+	+	Promoter (2-3kb)	8611069	8621754	10686	2	113219088	#NAME?	2917	GO:0003779::actin binding;GO:0007010::cytoskeleton organization;GO:0007218::neuropeptide signaling pathway;GO:0008255::ecdysis-triggering hormone activity;GO:0009523::photosystem II;GO:0009539::photosystem II reaction center;GO:0015979::photosynthesis;GO:0016020::membrane;GO:0018990::ecdysis, chitin-based cuticle
NC_037648.1	16226472	16226777	16226570;16226584;16226580	927	1066	836	1169	1200	1780	15.2099	17.2107	13.685	19.0125	20.9695	23.3667	11.1962	12.669	10.0737	13.9954	15.4359	17.2006	-0.458373	0.0256	1	-	-	-	+	+	+	Promoter (<=1kb)	16223273	16227123	3851	2	113219091	#NAME?	346	GO:0009055::electron carrier activity;GO:0016020::membrane;GO:0020037::heme binding;GO:0055114::oxidation-reduction process
NC_037648.1	11831748	11831992	11831920;11831882;11831877	124	118	137	175	146	204	2.04875	1.91947	2.2563	2.86	2.56662	2.6896	1.8836	1.76474	2.07442	2.62946	2.35973	2.4728	-0.382845	0.00872826	1	-	-	-	+	+	+	Distal Intergenic	11809624	11820195	10572	2	113219092	#NAME?	-11553	GO:0003677::DNA binding;GO:0006355::regulation of transcription, DNA-templated
NC_037648.1	11835765	11835983	11835872;11835863;11835927	147	111	130	171	157	170	2.42572	1.80656	2.14185	2.795	2.75868	2.24352	2.49496	1.85812	2.20298	2.87478	2.83742	2.30756	-0.290728	0.13344	1	-	-	-	+	+	+	Downstream (1-2kb)	11809624	11820195	10572	2	113219092	#NAME?	-15570	GO:0003677::DNA binding;GO:0006355::regulation of transcription, DNA-templated
NC_037648.1	11703544	11703864	11703669;11703682;11703684	169	145	197	215	233	303	2.7863	2.35498	3.2373	3.51	4.08564	3.98848	1.95519	1.65253	2.27167	2.46302	2.86696	2.79878	-0.467371	0.0314039	1	-	-	-	+	+	+	Promoter (1-2kb)	11702467	11741605	39139	1	113219097	#NAME?	1077	GO:0008270::zinc ion binding
NC_037648.1	11716482	11716881	11716649;11716619;11716628	187	158	150	218	216	338	3.08132	2.56467	2.46885	3.55875	3.78882	4.44768	1.73518	1.44424	1.39028	2.00403	2.13359	2.50461	-0.539571	0.0238973	1	-	-	-	+	+	+	Intron (XR_003305634.1/113219097, intron 2 of 2)	11702467	11741605	39139	1	113219097	#NAME?	14015	GO:0008270::zinc ion binding
NC_037648.1	13817545	13817783	13817643;13817657;13817668	168	366	403	476	587	864	2.76991	5.91971	6.6054	7.75125	10.2665	11.3488	2.61056	5.57916	6.22541	7.30534	9.67589	10.6959	-0.941112	0.042566	1	-	-	-	+	+	+	Distal Intergenic	13808554	13814108	5555	1	113219117	#NAME?	8991	GO:0004652::polynucleotide adenylyltransferase activity;GO:0043631::RNA polyadenylation
NC_037648.1	13816836	13817268	13817020;13817018;13817022	513	657	653	978	961	1345	8.42446	10.6135	10.6929	15.9088	16.7965	17.6595	4.38249	5.52125	5.56255	8.27592	8.73771	9.18665	-0.760455	0.00257548	1	-	-	-	+	+	+	Distal Intergenic	13808554	13814108	5555	1	113219117	#NAME?	8282	GO:0004652::polynucleotide adenylyltransferase activity;GO:0043631::RNA polyadenylation
NC_037650.1	7020371	7020688	7020539;7020543;7020542	145	163	124	254	269	327	2.39294	2.64532	2.04375	4.14375	4.7142	4.30336	1.69501	1.87378	1.44766	2.93517	3.33924	3.04823	-0.894072	0.00114224	1	-	-	-	+	+	+	Distal Intergenic	7001927	7006967	5041	1	113219201	#NAME?	18444	GO:0051539::4 iron, 4 sulfur cluster binding
NC_037651.1	5322152	5322478	5322310;5322316;5322323	78	151	131	346	197	445	1.29481	2.45176	2.1582	5.63875	3.45708	5.85152	0.891918	1.68887	1.48666	3.8842	2.38138	4.03076	-1.33994	0.041697	1	-	-	-	+	+	+	Intron (XM_026445127.1/408449, intron 2 of 6)	5342770	5343910	1141	2	113219229	#NAME?	21432	GO:0008168::methyltransferase activity;GO:0016706::oxidoreductase activity, acting on paired donors, with incorporation or reduction of molecular oxygen, 2-oxoglutarate as one donor, and incorporation of one atom each of oxygen into both donors;GO:0055114::oxidation-reduction process
NC_037651.1	8342664	8342974	8342817;8342802;8342819	148	250	154	523	240	512	2.44211	4.04863	2.53425	8.515	4.20786	6.73056	1.76877	2.93234	1.8355	6.16724	3.04767	4.87481	-1.10803	0.0927421	1	-	-	-	+	+	+	Promoter (<=1kb)	8336610	8342393	5784	2	113219231	#NAME?	-271	.
NC_037638.1	1575923	1576173	1576039;1576060;1576073	218	213	232	255	227	358	3.58941	3.45182	3.80955	4.16	3.98088	4.71008	3.22119	3.09771	3.41874	3.73324	3.5725	4.22689	-0.244077	0.0749597	1	-	-	-	+	+	+	Intron (XM_006558554.3/100576700, intron 1 of 5)	1591262	1593237	1976	2	113219393	#NAME?	17064	GO:0005137::interleukin-5 receptor binding;GO:0005576::extracellular region;GO:0006955::immune response;GO:0008083::growth factor activity;GO:0046872::metal ion binding
NC_037638.1	27426841	27427145	27426977;27426969;27427020	141	152	170	221	179	211	2.32738	2.46789	2.79585	3.6075	3.1428	2.78144	1.71883	1.8226	2.06481	2.66424	2.32104	2.05417	-0.328427	0.0954991	1	-	-	-	+	+	+	Distal Intergenic	27334320	27419667	85348	2	113219412	#NAME?	-7174	GO:0008083::growth factor activity;GO:0008654::phospholipid biosynthetic process;GO:0009878::nodule morphogenesis;GO:0016020::membrane;GO:0016780::phosphotransferase activity, for other substituted phosphate groups;GO:0046872::metal ion binding
NC_037638.1	27366455	27366722	27366581;27366589;27366618	174	198	180	330	179	321	2.86825	3.20987	2.95935	5.37875	3.1428	4.22464	2.41073	2.69786	2.4873	4.52078	2.64149	3.55076	-0.496075	0.193031	1	-	-	-	+	+	+	Intron (XM_026446307.1/113219412, intron 1 of 4)	27334320	27351870	17551	2	113219412	#NAME?	-14585	GO:0008083::growth factor activity;GO:0008654::phospholipid biosynthetic process;GO:0009878::nodule morphogenesis;GO:0016020::membrane;GO:0016780::phosphotransferase activity, for other substituted phosphate groups;GO:0046872::metal ion binding
