# Supplementary material for: The diverging epigenomic landscapes of honeybee queens and workers revealed by multiomic sequencing
Source: Research Square preprint supplement (doi:10.21203/rs.3.rs-1629662/v1), 2022-05-11
Supplement: Supplementary file 7 [file e7b56986c0392f2bd83feff5.docx]

**Table S1 Summary of Hi-C sequencing data quality**

| Sample | Raw bases(bp) | Clean bases(bp) | Effective rate(%) | Q20 | Q30 |
| --- | --- | --- | --- | --- | --- |
| 2Q | 174,016,746,900 | 167,834,950,500 | 97.28 | 96.65% | 91.37% |
| 2W | 164,039,352,000 | 159,404,012,400 | 96.08 | 96.28% | 90.70% |
| 4Q | 164,088,497,100 | 159,505,047,900 | 96.73 | 95.97% | 90.11% |
| 4W | 159,112,480,800 | 154,749,425,400 | 96.80 | 96.75% | 91.54% |

**Table S2 Summary of ATAC sequencing data quality**

| Sample | Raw_reads | Clean_reads | Clean_bases | Q20 | Q30 |
| --- | --- | --- | --- | --- | --- |
| 2Q-1 | 51954062 | 51261830 | 12.08G | 97.19% | 92.48% |
| 2Q-2 | 55155521 | 54327819 | 13.37G | 96.83% | 91.70% |
| 2Q-3 | 51110017 | 50105080 | 12.46G | 96.38% | 90.90% |
| 2W-1 | 49634019 | 47953544 | 11.38G | 96.44% | 91.06% |
| 2W-2 | 48187236 | 46824938 | 11.15G | 96.69% | 91.60% |
| 2W-3 | 67677152 | 65740942 | 15.65G | 96.66% | 91.51% |
| 4Q-1 | 60746927 | 60214453 | 12.79G | 97.80% | 93.82% |
| 4Q-2 | 57953156 | 57502987 | 11.53G | 98.03% | 94.35% |
| 4Q-3 | 52524073 | 52116424 | 10.15G | 97.93% | 94.14% |
| 4W-1 | 54146398 | 52906849 | 13.43G | 96.21% | 90.52% |
| 4W-2 | 58732102 | 57894330 | 14.59G | 96.58% | 91.01% |
| 4W-3 | 48687014 | 47999448 | 11.53G | 97.08% | 92.35% |

**Table S3 Summary of Chip sequencing data quality**

| Sample | Raw-reads | Clean-reads | Clean-bases | Q20 | Q30 |
| --- | --- | --- | --- | --- | --- |
| 2Q-1-IP | 14093925 | 13611172 | 3.96G | 96.69% | 91.48% |
| 2Q-1-In | 11606062 | 11355197 | 3.29G | 96.95% | 91.95% |
| 2Q-2-IP | 14087469 | 13535005 | 3.96G | 96.35% | 90.90% |
| 2Q-2-In | 11673766 | 11488832 | 3.35G | 97.03% | 92.11% |
| 2Q-3-IP | 13227922 | 12857886 | 3.76G | 96.90% | 91.85% |
| 2Q-3-In | 12679347 | 12138169 | 3.53G | 96.28% | 90.86% |
| 2W-1-IP | 14877196 | 14351280 | 4.24G | 96.45% | 91.01% |
| 2W-1-In | 11912122 | 11761430 | 3.42G | 97.38% | 92.67% |
| 2W-2-IP | 11571243 | 11135825 | 3.26G | 96.69% | 91.56% |
| 2W-2-In | 11785190 | 11625109 | 3.37G | 97.09% | 92.02% |
| 2W-3-IP | 14450606 | 14178284 | 4.13G | 97.23% | 92.54% |
| 2W-3-In | 16148785 | 15888358 | 4.58G | 97.12% | 92.19% |
| 4Q-1-IP | 10150595 | 9849160 | 2.88G | 96.71% | 91.59% |
| 4Q-1-In | 11971066 | 11800077 | 3.41G | 97.14% | 92.35% |
| 4Q-2-IP | 13669968 | 13361553 | 3.94G | 97.00% | 92.05% |
| 4Q-2-In | 11127635 | 10938533 | 3.18G | 96.87% | 91.72% |
| 4Q-3-IP | 12622128 | 12164883 | 3.60G | 96.45% | 91.04% |
| 4Q-3-In | 11839262 | 11651392 | 3.43G | 97.15% | 92.15% |
| 4W-1-IP | 12389959 | 12018174 | 3.53G | 96.79% | 91.70% |
| 4W-1-In | 14292084 | 14019768 | 4.02G | 97.11% | 92.22% |
| 4W-2-IP | 12973300 | 12730809 | 3.71G | 97.35% | 92.72% |
| 4W-2-In | 12748893 | 12512339 | 3.61G | 96.97% | 91.92% |
| 4W-3-IP | 13478734 | 13192060 | 3.87G | 97.11% | 92.08% |
| 4W-3-In | 11418041 | 11241926 | 3.26G | 97.26% | 92.47% |

**Table S4 Summary of RNA sequencing data quality**

| Sample | Raw_reads | Clean_reads | Clean_bases | Q20 | Q30 |
| --- | --- | --- | --- | --- | --- |
| 2Q-1 | 40635718 | 39798466 | 5.97G | 97.32% | 92.49% |
| 2Q-2 | 46026660 | 45094652 | 6.76G | 97.66% | 93.16% |
| 2Q-3 | 45458402 | 44547736 | 6.68G | 97.78% | 93.46% |
| 2W-1 | 45499830 | 44073916 | 6.61G | 97.67% | 93.32% |
| 2W-2 | 46087592 | 45285506 | 6.79G | 97.03% | 91.95% |
| 2W-3 | 45539272 | 44711848 | 6.71G | 97.13% | 92.16% |
| 4Q-1 | 47492266 | 46557810 | 6.98G | 97.88% | 93.67% |
| 4Q-2 | 48056474 | 47021542 | 7.05G | 97.95% | 93.90% |
| 4Q-3 | 46448564 | 45511910 | 6.83G | 97.89% | 93.74% |
| 4W-1 | 46666998 | 45756634 | 6.86G | 97.30% | 92.42% |
| 4W-2 | 45497550 | 44618032 | 6.69G | 97.26% | 92.38% |
| 4W-3 | 45209478 | 44509088 | 6.68G | 97.54% | 93.14% |
