# Supplementary material for: The diverging epigenomic landscapes of honeybee queens and workers revealed by multiomic sequencing
Source: Research Square preprint supplement (doi:10.21203/rs.3.rs-1629662/v1), 2022-05-11
Supplement: Supplementary file 8 [file 086c6e2a20bb28281d2143b9.xlsx]

## Sheet: 2Qvs2W_up
gene_id	2Q1	2Q2	2Q3	2w1	2w2	2w3	2Q	2w	log2FoldChange	pvalue	padj	gene_name	gene_chr	gene_start	gene_end	gene_strand	gene_length	gene_biotype	gene_description	tf_family
113219221	1794.74	925.084	2074.47	179.82	156.61	174.156	1598.1	170.195	3.23055	1.98366e-27	3.62018e-24	LOC113219221	NC_037651.1	4882156	4885996	-	1812	protein_coding	esterase E4-like	COesterase
412843	1506.76	5247.14	4973.87	348.687	332.529	298.266	3909.25	326.494	3.5818	3.45796e-20	2.10359e-17	LOC412843	NC_037640.1	4849307	4859607	+	4095	protein_coding	phosphoenolpyruvate carboxykinase%2C transcript variant X2	-
413186	2419.23	2309.9	2680.04	955.694	1117.73	958.856	2469.72	1010.76	1.2893	1.41155e-17	5.85475e-15	LOC413186	NC_037639.1	10522063	10524943	-	1465	protein_coding	mitochondrial pyruvate carrier 3	-
100576555	1708.45	4434.41	2883.45	359.64	524.537	304.272	3008.77	396.15	2.92561	1.94786e-17	7.72792e-15	LOC100576555	NC_037650.1	5587282	5593549	-	4111	protein_coding	cytochrome b561 domain-containing protein 2	Cytochrom_B561
412591	1878.87	1552.42	1641.39	519.379	721.909	601.537	1690.89	614.275	1.46145	3.86231e-15	1.35552e-12	LOC412591	NC_037648.1	10422253	10522338	-	2696	protein_coding	calcitonin gene-related peptide type 1 receptor%2C transcript variant X1	7tm_2
551991	432.506	647.933	547.444	157	74.0145	100.089	542.628	110.368	2.29426	4.06198e-14	1.23552e-11	LOC551991	NC_037653.1	2980733	2987209	-	3293	protein_coding	uncharacterized LOC551991%2C transcript variant X3	-
409712	2279.02	2168.52	2204.77	1056.1	1189.59	925.827	2217.44	1057.17	1.06886	4.73232e-12	1.10724e-09	LOC409712	NC_037652.1	7870499	7874116	+	1537	protein_coding	short/branched chain specific acyl-CoA dehydrogenase%2C mitochondrial	-
727110	1035.43	1989.68	1984.48	157	445.159	287.256	1669.86	296.472	2.49512	3.7161e-11	7.37161e-09	LOC727110	NC_037649.1	188979	191132	+	1741	protein_coding	yellow-x2	-
551527	4248.48	5134.78	5109.79	799.606	1856.8	1212.08	4831.02	1289.5	1.90595	4.82014e-11	9.35825e-09	LOC551527	NC_037641.1	2073062	2097526	-	2306	protein_coding	acyl-CoA Delta(11) desaturase%2C transcript variant X1	-
410638	1361.15	1981.25	1571.09	614.309	748.726	492.44	1637.83	618.492	1.40548	6.20553e-10	9.93428e-08	LOC410638	NC_037653.1	6754819	6762855	-	3866	protein_coding	aromatic-L-amino-acid decarboxylase	-
551966	6597.6	4920.36	6080.94	1784.51	2542.24	2748.45	5866.3	2358.4	1.31476	1.35155e-09	1.98917e-07	LOC551966	NC_037640.1	597759	601973	-	1838	protein_coding	multifunctional protein ADE2%2C transcript variant X1	-
726786	982.576	976.582	1051.77	364.204	544.918	397.355	1003.64	435.492	1.20578	1.93752e-09	2.76248e-07	LOC726786	NC_037644.1	4881425	4932463	+	2252	protein_coding	proton-coupled amino acid transporter 1%2C transcript variant X1	Aa_trans
413816	580.27	454.115	509.01	195.338	241.351	256.229	514.465	230.973	1.15591	7.51343e-09	9.39179e-07	LOC413816	NC_037648.1	10017771	10029620	+	3286	protein_coding	sodium-independent sulfate anion transporter%2C transcript variant X5	Sulfate_transp
726040	17146	24290.9	20576	8288.16	9752.75	11001.8	20671	9680.91	1.09444	1.7528e-08	1.9746e-06	LOC726040	NC_037650.1	5750297	5759779	+	2983	protein_coding	4-coumarate--CoA ligase 1%2C transcript variant X2	AMP-binding
novel.406	616.941	621.716	630.873	337.733	292.84	225.201	623.177	285.258	1.1266	1.79335e-08	1.99565e-06	-	NC_037650.1	227	10979	+	4632	-	-	-
410614	3114.91	3780.86	4503.29	1015.03	1839.63	1512.35	3799.68	1455.67	1.38459	4.82261e-08	5.00072e-06	LOC410614	NC_037652.1	6300308	6306604	+	5341	protein_coding	tubulin alpha chain	-
102654146	280.428	159.174	244.662	41.9885	80.4505	74.0661	228.088	65.5017	1.80318	7.72771e-08	7.83504e-06	LOC102654146	NC_037639.1	346229	353976	-	1373	protein_coding	antifreeze protein Maxi	-
novel.407	31.2785	58.0518	28.1221	0.912793	5.36337	2.00179	39.1508	2.75932	3.86823	2.018e-07	1.84143e-05	-	NC_037650.1	35265	36823	+	1507	-	-	-
552832	2151.74	1785.56	2003.23	813.298	1198.18	890.795	1980.18	967.423	1.03384	2.12362e-07	1.91862e-05	LOC552832	NC_037648.1	15325631	15328392	-	1201	protein_coding	glycine N-methyltransferase	-
411207	11713.3	11733	8790.04	2901.77	5548.94	4625.13	10745.4	4358.61	1.30188	4.93372e-07	4.04659e-05	LOC411207	NC_037641.1	10599268	10604226	-	4959	protein_coding	CCAAT/enhancer-binding protein	-
100577408	427.113	558.047	513.697	230.937	284.258	205.183	499.619	240.126	1.05868	4.96677e-07	4.04659e-05	LOC100577408	NC_037645.1	5097232	5108923	+	2803	protein_coding	leukocyte elastase inhibitor%2C transcript variant X3	Serpin
409924	6596.53	6790.19	5517.56	2499.23	3801.55	3111.78	6301.43	3137.52	1.00621	5.63831e-07	4.45456e-05	LOC409924	NC_037638.1	9274925	9296077	-	3017	protein_coding	synaptic vesicle glycoprotein 2B%2C transcript variant X2	MFS_1
408291	33740.9	35402.3	37327.4	22110.6	23759.7	19207.2	35490.2	21692.5	0.710238	9.39929e-07	6.80703e-05	LOC408291	NC_037647.1	9482407	9485014	-	1679	protein_coding	3-ketoacyl-CoA thiolase%2C mitochondrial	Thiolase_N
410537	559.777	764.973	909.282	182.559	192.009	376.336	744.677	250.301	1.57344	1.01281e-06	7.16499e-05	LOC410537	NC_037651.1	8918981	8943930	+	4206	protein_coding	protein lozenge	Runt
412838	2875.46	2444.73	2291.02	1045.15	1525.34	1332.19	2537.07	1300.89	0.963922	1.01291e-06	7.16499e-05	LOC412838	NC_037645.1	6752255	6892488	-	6432	protein_coding	alpha-mannosidase 2%2C transcript variant X2	-
726812	1842.2	1978.44	2024.79	1173.85	730.491	1009.9	1948.48	971.415	1.00368	1.23982e-06	8.57073e-05	LOC726812	NC_037639.1	2841257	2843970	+	1916	protein_coding	RNA polymerase I-specific transcription initiation factor RRN3	RRN3
724779	3214.13	2732.18	2449.44	1701.45	1140.25	1374.23	2798.58	1405.31	0.993334	1.40138e-06	9.47232e-05	LOC724779	NC_037640.1	9906294	9916267	+	4558	protein_coding	protein artichoke%2C transcript variant X1	-
100577537	5819.96	5220.92	4533.29	714.717	2288.01	1747.56	5191.39	1583.43	1.71331	1.5642e-06	0.000101952	LOC100577537	NC_037648.1	194850	203179	-	3744	protein_coding	uncharacterized LOC100577537%2C transcript variant X1	-
552149	1837.88	1914.77	1501.72	607.007	1050.15	670.599	1751.46	775.918	1.17517	1.59311e-06	0.000102374	LOC552149	NC_037640.1	12686465	12716569	-	2512	protein_coding	aquaporin AQPAn.G%2C transcript variant X1	-
100576683	764.705	644.188	743.361	406.193	403.325	449.401	717.418	419.64	0.773324	1.68903e-06	0.000107779	LOC100576683	NC_037642.1	11383277	11400558	+	6288	protein_coding	uncharacterized LOC100576683%2C transcript variant X6	Guanylate_cyc
408273	257.778	247.188	298.094	79.413	79.3778	147.131	267.687	101.974	1.39279	2.24548e-06	0.000139388	Y-y	NC_037647.1	11506149	11513111	-	1436	protein_coding	yellow-y	-
410087	485.356	210.672	295.282	88.5409	137.302	98.0876	330.437	107.977	1.61426	2.5796e-06	0.000156926	LOC410087	NC_037639.1	4820592	4826090	-	1810	protein_coding	uncharacterized LOC410087	-
551769	2224.01	2489.67	2713.78	1235.01	1477.07	1609.44	2475.82	1440.51	0.78169	5.15465e-06	0.000285068	LOC551769	NC_037652.1	5224824	5226496	+	1146	protein_coding	grpE protein homolog%2C mitochondrial	-
411813	5933.21	6766.78	6319.98	3907.67	4327.16	4293.83	6339.99	4176.22	0.602411	5.80574e-06	0.00031723	LOC411813	NC_037649.1	2275794	2301397	+	2968	protein_coding	NADP-dependent malic enzyme%2C transcript variant X2	Malic_M
725274	61468.7	77494.5	71443.3	41263.7	46815.8	43739.1	70135.5	43939.5	0.67464	7.98226e-06	0.000404656	LOC725274	NC_037648.1	2630214	2633121	+	1309	protein_coding	3-hydroxyacyl-CoA dehydrogenase type-2	adh_short
411568	621.256	737.82	768.671	437.228	372.218	434.388	709.249	414.611	0.774461	8.61767e-06	0.000432067	LOC411568	NC_037650.1	2191879	2233868	+	2117	protein_coding	ribosomal oxygenase 1%2C transcript variant X2	Cupin_4
411188	29926	30168.2	27840	6809.43	17481.4	7495.69	29311.4	10595.5	1.46805	1.16126e-05	0.000554792	LOC411188	NC_037644.1	13956935	13959890	+	1438	protein_coding	L-lactate dehydrogenase%2C transcript variant X2	-
100578780	696.755	649.806	659.932	252.844	416.197	375.335	668.831	348.125	0.943366	2.25506e-05	0.00100378	LOC100578780	NC_037647.1	11643416	11653946	+	5280	protein_coding	helix-loop-helix protein delilah	HLH
novel.116	102.464	115.167	154.672	47.4652	60.0697	51.0456	124.101	52.8602	1.23551	2.28245e-05	0.00101104	-	NC_037640.1	2689559	2704258	-	4159	-	-	-
100577028	742.055	451.306	511.823	118.663	125.503	310.277	568.395	184.814	1.62067	2.35934e-05	0.00104005	LOC100577028	NC_037645.1	4175629	4185151	-	2902	protein_coding	insulin-like growth factor I%2C transcript variant X2	-
552679	538.206	775.273	684.305	185.297	395.816	259.231	665.928	280.115	1.25125	2.40807e-05	0.00105643	LOC552679	NC_037642.1	10893192	10904379	+	2933	protein_coding	cytochrome P450 4c3	p450
412708	2184.1	2526.19	2773.78	1418.48	1197.1	1692.51	2494.69	1436.03	0.796765	3.08435e-05	0.00134663	LOC412708	NC_037640.1	2176749	2178358	+	1260	protein_coding	calcyclin-binding protein	-
410780	1031.11	1045.87	1007.71	558.629	733.709	519.464	1028.23	603.934	0.768393	3.28715e-05	0.00142158	LOC410780	NC_037638.1	24729432	24863356	-	6114	protein_coding	sodium/hydrogen exchanger 9B2%2C transcript variant X5	Na_H_Exchanger
552255	92.7569	669.469	469.639	92.1921	104.049	64.0572	410.622	86.7662	2.24345	3.40025e-05	0.0014477	Br-c	NC_037650.1	3298951	3357708	-	16159	protein_coding	broad-complex%2C transcript variant X12	-
726250	820.791	671.341	943.028	397.978	425.851	523.467	811.72	449.099	0.854135	3.42792e-05	0.00144814	LOC726250	NC_037652.1	7727328	7733724	+	4699	protein_coding	cilia- and flagella-associated protein 43-like%2C transcript variant X1	-
412467	3914.13	3789.29	4187.38	2496.49	2543.31	2921.61	3963.6	2653.8	0.578794	3.55393e-05	0.00149445	LOC412467	NC_037646.1	5768642	5771517	-	2070	protein_coding	bifunctional purine biosynthesis protein PURH	-
724518	1887.5	1600.17	2262.89	618.873	660.767	1233.1	1916.85	837.58	1.19452	4.01295e-05	0.00166446	LOC724518	NC_037644.1	10778033	10892758	-	8211	protein_coding	serine-rich adhesin for platelets%2C transcript variant X1	-
410559	3355.43	3173.19	3913.66	910.967	2221.51	1212.08	3480.76	1448.19	1.26551	4.30291e-05	0.00177665	LOC410559	NC_037651.1	10000649	10005586	-	4635	protein_coding	tubulin beta chain%2C transcript variant X2	-
412287	9756.73	12152.5	12067.2	5969.66	7446.5	7526.72	11325.5	6980.96	0.698168	5.55137e-05	0.00222177	LOC412287	NC_037638.1	6024805	6027394	+	1699	protein_coding	peptidyl-prolyl cis-trans isomerase FKBP4%2C transcript variant X3	FKBP_C
551179	2502.28	4387.59	4009.28	1156.51	2100.29	1679.5	3633.05	1645.43	1.14304	5.71777e-05	0.00227837	LOC551179	NC_037644.1	13421090	13423725	-	1515	protein_coding	methyl farnesoate epoxidase	p450
551465	4213.97	2897.91	4001.78	1838.36	2382.41	2115.89	3704.55	2112.22	0.81061	6.3374e-05	0.00248192	LOC551465	NC_037640.1	1069115	1076099	+	1846	protein_coding	homogentisate 1%2C2-dioxygenase	-
413192	490.749	545.874	565.255	351.425	337.892	350.313	533.959	346.543	0.624057	7.24228e-05	0.00280024	LOC413192	NC_037644.1	398886	400468	-	1200	protein_coding	protein HGH1 homolog	-
725967	8061.22	3190.04	5808.15	1864.84	2508.98	2746.45	5686.47	2373.42	1.26056	7.75062e-05	0.00295918	LOC725967	NC_037645.1	2704495	2708002	+	2229	protein_coding	D-3-phosphoglycerate dehydrogenase%2C transcript variant X1	2-Hacid_dh_C
107966053	1086.12	944.747	943.028	690.071	566.372	453.405	991.298	569.949	0.797728	8.71105e-05	0.00329827	LOC107966053	NC_037638.1	20600964	20608519	+	2482	protein_coding	uncharacterized LOC107966053%2C transcript variant X6	-
408473	534.97	498.122	477.139	268.361	347.546	313.28	503.41	309.729	0.7017	8.87595e-05	0.00334682	LOC408473	NC_037651.1	8988151	9008875	-	4165	protein_coding	uncharacterized LOC408473	-
726819	410.935	409.172	540.882	294.832	229.552	246.22	453.663	256.868	0.819858	9.55645e-05	0.00357388	LOC726819	NC_037645.1	12004510	12007785	+	2632	protein_coding	ATP-dependent RNA helicase DDX51	DEAD
412431	530.656	548.683	554.006	286.617	168.41	341.305	544.448	265.444	1.0353	0.000105121	0.00386785	LOC412431	NC_037647.1	4930673	4934307	+	1450	protein_coding	thiamine transporter 2	-
408270	39324.6	42201.8	40711.5	14375.6	26613	23667.1	40746	21551.9	0.918868	0.000110351	0.00399319	CytC	NC_037647.1	11824493	11827235	-	1080	protein_coding	mitochondrial cytochrome C	-
724299	941.59	892.313	755.548	576.885	567.444	537.48	863.15	560.603	0.622169	0.00011312	0.00406387	LOC724299	NC_037639.1	15135524	15151122	-	6379	protein_coding	peripheral-type benzodiazepine receptor-associated protein 1%2C transcript variant X6	SH3_2
412067	1485.19	1852.04	1779.19	1141.9	1115.58	1149.03	1705.47	1135.5	0.587109	0.000113918	0.00407648	LOC412067	NC_037641.1	2831417	2833436	+	1666	protein_coding	cysteine and histidine-rich domain-containing protein	-
410591	298.764	343.629	348.714	193.512	178.064	222.198	330.369	197.925	0.739445	0.00011551	0.00410137	LOC410591	NC_037652.1	7561282	7562315	+	700	protein_coding	splicing regulator RBM11	RRM_1
107965199	4765.12	5481.22	4594.22	2332.19	3545.19	2869.56	4946.85	2915.64	0.762907	0.000115513	0.00410137	LOC107965199	NC_037648.1	10467257	10471396	+	2746	protein_coding	UDP-glucuronosyltransferase 1-1%2C transcript variant X4	-
413399	2667.3	3781.8	2567.55	1800.03	1736.66	1846.65	3005.55	1794.44	0.74416	0.000138143	0.00466872	LOC413399	NC_037641.1	5057625	5131172	-	7198	protein_coding	zinc finger SWIM domain-containing protein 8%2C transcript variant X3	-
724275	320.335	397	426.519	53.8548	213.462	119.106	381.284	128.808	1.5688	0.000152286	0.0050503	LOC724275	NC_037639.1	3887868	3909867	+	1908	protein_coding	uncharacterized LOC724275%2C transcript variant X5	-
725489	73.3427	97.3773	83.4289	43.814	36.4709	25.0223	84.7163	35.1024	1.26955	0.000164476	0.00532293	LOC725489	NC_037638.1	13091754	13141406	+	1500	protein_coding	farnesol dehydrogenase%2C transcript variant X3	adh_short
724239	3573.3	2727.5	2375.38	795.042	1782.78	1392.24	2892.06	1323.36	1.12815	0.000170486	0.00547775	LOC724239	NC_037638.1	22720414	22725817	+	1959	protein_coding	kynurenine/alpha-aminoadipate aminotransferase%2C mitochondrial	Aminotran_1_2
726061	4521.36	5069.24	4783.57	2848.83	3111.83	3643.25	4791.39	3201.3	0.581898	0.000184655	0.00581027	LOC726061	NC_037638.1	20142640	20143585	+	736	protein_coding	mitochondrial import inner membrane translocase subunit Tim10%2C transcript variant X3	-
409424	1934.95	2544.92	1883.24	1369.19	1349.42	1341.2	2121.04	1353.27	0.648433	0.000190396	0.00597031	LOC409424	NC_037653.1	1253258	1272233	+	3353	protein_coding	solute carrier family 2%2C facilitated glucose transporter member 1%2C transcript variant X2	Sugar_tr
408511	1378.41	1768.71	1826.06	1124.56	919.281	1069.96	1657.73	1037.93	0.675486	0.000196483	0.00609832	LOC408511	NC_037652.1	7753236	7756505	-	2304	protein_coding	protein preli-like	MSF1
413117	3746.95	3836.1	2777.53	901.839	2064.9	1789.6	3453.53	1585.44	1.12343	0.000200779	0.00618957	LOC413117	NC_037641.1	8637987	8648454	+	4146	protein_coding	proton-coupled amino acid transporter-like protein pathetic	Aa_trans
107964891	555.463	599.245	608.375	416.233	361.491	404.361	587.694	394.028	0.576401	0.000239017	0.00710434	LOC107964891	NC_037645.1	1440022	1441045	+	824	protein_coding	THO complex subunit 7 homolog%2C transcript variant X2	-
100577976	271.799	261.233	290.595	187.123	155.538	165.147	274.543	169.269	0.696219	0.000244809	0.00718291	LOC100577976	NC_037641.1	6766824	6767711	+	888	protein_coding	GSK3-beta interaction protein	-
724506	1133.58	1310.85	1375.17	808.734	504.156	821.734	1273.2	711.542	0.839009	0.00024742	0.0072275	LOC724506	NC_037651.1	6764426	6766951	+	2134	protein_coding	HEAT repeat-containing protein 3	-
412610	1961.92	2271.51	2441.94	1272.43	1253.96	1657.48	2225.12	1394.62	0.674165	0.000249604	0.00725362	LOC412610	NC_037638.1	2191810	2197321	+	2640	protein_coding	glutathione synthetase%2C transcript variant X1	-
100577064	499.377	1294.93	570.879	414.408	252.078	214.191	788.396	293.559	1.42488	0.000263318	0.00750869	LOC100577064	NC_037646.1	6875856	6878478	+	1423	protein_coding	uncharacterized LOC100577064%2C transcript variant X2	-
413877	942.669	993.435	1023.65	599.705	452.668	711.635	986.583	588.003	0.746233	0.000267568	0.00760611	LOC413877	NC_037643.1	16466009	16466971	+	755	protein_coding	nuclear cap-binding protein subunit 2	RRM_1
552635	301.999	361.419	380.586	234.588	145.884	192.172	348.002	190.881	0.864845	0.00027386	0.00771289	LOC552635	NC_037641.1	8880403	8881617	-	907	protein_coding	frataxin homolog%2C mitochondrial	Frataxin_Cyay
413575	5905.16	7974.64	4915.75	2977.53	4285.33	2892.58	6265.18	3385.15	0.88825	0.000288301	0.00802058	LOC413575	NC_037638.1	20451866	20473760	-	4081	protein_coding	facilitated trehalose transporter Tret1	Sugar_tr
409633	33.4356	46.816	60.9313	6.38955	7.50871	21.0188	47.061	11.639	2.0203	0.000292238	0.00805641	LOC409633	NC_037645.1	4202401	4206565	+	1312	protein_coding	ras-related and estrogen-regulated growth inhibitor	Ras
725918	2276.86	2477.5	2352.88	1400.22	1762.4	1677.5	2369.08	1613.37	0.554632	0.000303266	0.00823603	LOC725918	NC_037650.1	2163239	2165825	-	477	protein_coding	39S ribosomal protein L53%2C mitochondrial	-
725455	60.3998	183.519	324.342	28.2966	62.2151	57.0509	189.42	49.1875	1.94897	0.000305315	0.0082426	LOC725455	NC_037638.1	5779104	5783161	+	1825	protein_coding	fructose-bisphosphate aldolase	-
724129	1802.29	2071.14	2023.86	1485.11	1309.73	1172.05	1965.76	1322.3	0.571971	0.000356397	0.00938946	LOC724129	NC_037640.1	6130957	6134005	+	2408	protein_coding	pescadillo homolog%2C transcript variant X1	-
725107	263.171	275.278	347.777	163.39	154.465	198.177	295.409	172.011	0.780744	0.000358877	0.00938946	LOC725107	NC_037647.1	3558617	3560120	-	1207	protein_coding	mitochondrial genome maintenance exonuclease 1	-
552780	448.685	387.636	430.268	287.53	277.822	277.248	422.196	280.867	0.587248	0.000359115	0.00938946	LOC552780	NC_037642.1	9838677	9839814	-	807	protein_coding	ribonuclease P/MRP protein subunit POP5	-
725457	74.4212	33.7075	60.9313	13.6919	9.65406	25.0223	56.3533	16.1228	1.80092	0.000371475	0.00961492	LOC725457	NC_037638.1	17943308	17952729	+	3405	protein_coding	sodium channel protein Nach	-
551865	978.262	921.339	873.66	635.304	653.258	673.601	924.42	654.054	0.498958	0.000375024	0.00966693	LOC551865	NC_037643.1	13323698	13353752	+	4303	protein_coding	uncharacterized LOC551865%2C transcript variant X1	-
102654029	2777.31	2792.11	2868.46	2045.57	1652.99	2086.86	2812.63	1928.47	0.544247	0.000379873	0.00976435	LOC102654029	NC_037647.1	10317615	10321527	-	1029	protein_coding	uncharacterized LOC102654029%2C transcript variant X1	-
411355	4624.9	5262.12	4887.62	3072.46	3800.48	3338.98	4924.88	3403.97	0.533068	0.000382924	0.00981511	LOC411355	NC_037643.1	5445314	5458762	+	6200	protein_coding	von Willebrand factor A domain-containing protein 8	AAA_5
100576736	844.519	749.992	857.725	376.071	607.133	453.405	817.412	478.87	0.772454	0.000391534	0.00997975	LOC100576736	NC_037653.1	2978344	2979755	-	778	protein_coding	uncharacterized LOC100576736	-
724542	2365.3	2701.28	2411	1382.88	1692.68	1853.66	2492.53	1643.07	0.601507	0.000412934	0.0103802	LOC724542	NC_037647.1	2853072	2855966	+	2326	protein_coding	U3 small nucleolar RNA-associated protein 4 homolog	-
novel.5	171.492	107.677	159.359	87.6281	57.9244	62.0554	146.176	69.2026	1.07407	0.000430572	0.0106836	-	NC_037638.1	1928072	1934608	+	6440	-	-	-
410875	762.548	844.561	893.346	591.49	587.825	562.502	833.485	580.606	0.522	0.000440054	0.0108527	LOC410875	NC_037639.1	10379535	10380927	+	1257	protein_coding	probable ribosome production factor 1	-
novel.112	197.378	153.556	330.904	115.012	50.4156	99.0885	227.279	88.172	1.36365	0.000444289	0.0108982	-	NC_037640.1	1713	13034	-	3612	-	-	-
725021	63.6356	63.6698	44.058	25.5582	21.4535	22.0197	57.1211	23.0104	1.30748	0.000446347	0.0109194	LOC725021	NC_037645.1	4511467	4555900	-	1527	protein_coding	trypsin 3A1%2C transcript variant X2	Trypsin
551400	745.291	866.096	834.289	612.484	467.686	513.458	815.225	531.209	0.617365	0.000466354	0.0111692	LOC551400	NC_037644.1	940007	941436	+	742	protein_coding	coiled-coil domain-containing protein 86	-
726081	3191.48	3665.69	3442.15	2160.58	2545.45	2524.25	3433.11	2410.1	0.510685	0.000491142	0.011671	LOC726081	NC_037643.1	13032257	13035398	-	2332	protein_coding	mitochondrial import receptor subunit TOM70	-
552401	1650.21	2362.34	1836.37	1172.94	1327.97	1232.1	1949.64	1244.34	0.6482	0.00050327	0.0118359	LOC552401	NC_037646.1	6007533	6017656	-	2635	protein_coding	protein cueball	-
100576366	402.306	444.752	494.012	287.53	216.68	308.275	447.023	270.828	0.722374	0.00052029	0.0121734	LOC100576366	NC_037640.1	12271199	12272979	+	1435	protein_coding	tRNA-splicing endonuclease subunit Sen2	-
410676	876.876	867.969	930.842	476.478	511.665	690.617	891.896	559.587	0.672779	0.000545287	0.0126932	LOC410676	NC_037638.1	21488281	21489212	-	743	protein_coding	adenylate kinase isoenzyme 6	-
102653748	449.763	728.457	651.496	295.745	353.982	389.348	609.905	346.358	0.817548	0.000556714	0.0128934	LOC102653748	NC_037651.1	10507585	10521356	+	3840	protein_coding	growth/differentiation factor 8	TGFb_propeptide
412985	500.456	561.792	552.131	406.193	319.657	323.289	538.126	349.713	0.620987	0.000578543	0.0132311	LOC412985	NC_037643.1	15043923	15046732	+	2429	protein_coding	guanine nucleotide-binding protein-like 1	-
408675	2734.17	2963.45	2868.46	2084.82	2018.77	2221.98	2855.36	2108.52	0.437486	0.000585342	0.0133531	LOC408675	NC_037639.1	14641367	14642910	-	1174	protein_coding	probable 39S ribosomal protein L24%2C mitochondrial	KOW
408463	7209.15	6248.06	5788.47	2898.12	4788.41	3767.36	6415.23	3817.96	0.748803	0.000598919	0.0135949	LOC408463	NC_037651.1	8032761	8058886	+	8505	protein_coding	uncharacterized LOC408463%2C transcript variant X8	-
412619	3205.51	2315.52	2839.4	1163.81	2032.72	1512.35	2786.81	1569.63	0.828422	0.000631577	0.0141949	LOC412619	NC_037640.1	602649	607412	+	1769	protein_coding	amidophosphoribosyltransferase%2C transcript variant X1	Pribosyltran
100577679	279.349	337.075	322.467	177.995	151.247	225.201	312.964	184.814	0.759917	0.0006476	0.0144837	LOC100577679	NC_037652.1	1576734	1579419	+	1958	protein_coding	origin recognition complex subunit 2%2C transcript variant X1	-
552025	1006.3	1108.6	1067.7	784.089	583.534	741.662	1060.87	703.095	0.592919	0.000672668	0.0148983	LOC552025	NC_037642.1	10994562	10996779	+	1593	protein_coding	tyrosine--tRNA ligase%2C mitochondrial	-
412363	1117.4	1187.25	1246.75	847.984	671.493	868.776	1183.8	796.085	0.572094	0.000675378	0.0149037	LOC412363	NC_037647.1	8051348	8052981	-	1563	protein_coding	cilia- and flagella-associated protein 20	-
412262	161.785	152.62	139.673	101.32	80.4505	67.0599	151.36	82.9435	0.864521	0.000699915	0.0152792	LOC412262	NC_037638.1	21025148	21027811	+	2664	protein_coding	protein Hook homolog 3	-
100577607	958.848	1161.04	1130.51	574.147	743.363	777.694	1083.46	698.401	0.63436	0.000713561	0.01554	LOC100577607	NC_037647.1	381765	383919	+	1163	protein_coding	dehydrogenase/reductase SDR family member 4	adh_short
551327	25350.7	19821	16071.8	14136.4	9212.12	11939.7	20414.5	11762.7	0.795314	0.000718528	0.0156109	LOC551327	NC_037651.1	6019727	6024363	+	1566	protein_coding	carboxypeptidase B	-
551406	1278.1	1707.85	1964.8	1129.12	863.502	1007.9	1650.25	1000.18	0.722407	0.000723886	0.0156899	LOC551406	NC_037638.1	11840364	11841949	-	1426	protein_coding	cell growth-regulating nucleolar protein	-
novel.200	1138.97	2696.6	1685.45	1141.9	719.764	668.597	1840.34	843.421	1.12553	0.000738615	0.0159335	-	NC_037643.1	1376155	1381188	+	1651	-	-	-
413989	1753.75	1940.99	2000.42	1306.21	1017.97	1421.27	1898.39	1248.48	0.604435	0.000785517	0.0167804	LOC413989	NC_037647.1	246436	247938	-	1227	protein_coding	39S ribosomal protein L46%2C mitochondrial	-
100578468	62.557	53.3702	62.8061	9.12793	21.4535	31.0277	59.5778	20.5364	1.54358	0.000816501	0.0173269	LOC100578468	NC_037639.1	74168	76404	+	1235	protein_coding	uncharacterized LOC100578468%2C transcript variant X2	-
113218983	1799.05	1984.06	1874.81	1417.57	1234.65	1425.27	1885.97	1359.16	0.472457	0.000831176	0.0175161	LOC113218983	NC_037646.1	1143873	1146838	-	842	protein_coding	60S ribosome subunit biogenesis protein NIP7 homolog	-
100578881	197.378	228.462	231.539	156.088	119.067	115.103	219.126	130.086	0.750867	0.000851182	0.0178143	LOC100578881	NC_037638.1	15189784	15190552	+	500	protein_coding	histone H3.3-like type 1	-
724355	486.434	491.568	557.755	357.815	322.875	368.329	511.919	349.673	0.549737	0.000863457	0.0179331	LOC724355	NC_037644.1	9124345	9125919	-	1205	protein_coding	transcription initiation factor IIE subunit beta	-
552623	532.813	588.945	596.189	366.03	249.933	408.365	572.649	341.442	0.745263	0.000864719	0.0179331	LOC552623	NC_037645.1	7189683	7192199	+	1714	protein_coding	vacuolar fusion protein CCZ1 homolog	-
102654768	194.142	193.818	218.415	101.32	49.343	127.114	202.125	92.5922	1.12392	0.000872398	0.0180513	LOC102654768	NC_037652.1	2478453	2480307	+	1201	protein_coding	transcription termination factor 5%2C mitochondrial	-
100577569	81.9712	115.167	157.484	30.1222	51.4883	65.0581	118.207	48.8895	1.27879	0.000892936	0.0183407	LOC100577569	NC_037650.1	3451467	3464580	-	4502	protein_coding	uncharacterized LOC100577569%2C transcript variant X2	-
725880	2732.01	2911.95	3193.74	1897.7	1673.37	2310.06	2945.9	1960.38	0.58757	0.000894422	0.0183407	LOC725880	NC_037647.1	6315325	6317612	-	574	protein_coding	small nuclear ribonucleoprotein F%2C transcript variant X3	-
725491	3273.46	3830.48	3800.24	2412.51	2222.58	2845.54	3634.73	2493.54	0.543696	0.000903892	0.0184933	LOC725491	NC_037639.1	12129848	12134050	-	3796	protein_coding	GPI mannosyltransferase 1%2C transcript variant X1	-
552279	1353.6	789.318	1128.63	520.292	682.22	675.603	1090.52	626.038	0.800715	0.000930888	0.0189184	LOC552279	NC_037645.1	2692962	2696422	-	2277	protein_coding	sodium-independent sulfate anion transporter%2C transcript variant X1	Sulfate_transp
411164	388.285	452.242	488.387	302.134	286.404	301.269	442.972	296.602	0.579264	0.000945713	0.019177	LOC411164	NC_037643.1	9668897	9673556	-	2799	protein_coding	DNA-directed RNA polymerase III subunit RPC3	RNA_pol_Rpc82
727596	536.049	614.226	628.998	393.414	355.055	444.397	593.091	397.622	0.577006	0.000959543	0.0193285	LOC727596	NC_037638.1	5362636	5365418	+	1191	protein_coding	malectin%2C transcript variant X2	-
552087	514.477	555.238	636.497	377.896	357.2	414.37	568.737	383.155	0.570164	0.000966482	0.0193827	LOC552087	NC_037644.1	12331740	12333603	-	1567	protein_coding	2-(3-amino-3-carboxypropyl)histidine synthase subunit 1	-
410456	1278.1	1219.09	1290.81	769.484	1001.88	677.605	1262.67	816.322	0.62971	0.000987882	0.0197252	LOC410456	NC_037650.1	6326339	6354364	-	5038	protein_coding	uncharacterized LOC410456%2C transcript variant X1	-
411448	142.371	137.639	135.924	82.1513	46.125	84.0751	138.645	70.7838	0.96565	0.000992346	0.0197408	LOC411448	NC_037645.1	6482283	6483514	-	958	protein_coding	alpha-ketoglutarate-dependent dioxygenase alkB homolog 7%2C mitochondrial	-
113219265	10554.9	11969	7308	5214.78	6864.04	5821.2	9943.95	5966.67	0.73693	0.000992988	0.0197408	LOC113219265	NC_037652.1	7484131	7486821	-	1237	protein_coding	trypsin-1-like	Trypsin
411795	1254.38	1651.67	1412.67	1036.02	923.572	990.885	1439.57	983.492	0.54974	0.00101388	0.0200687	LOC411795	NC_037648.1	7233459	7236380	-	1995	protein_coding	Golgi to ER traffic protein 4 homolog%2C transcript variant X2	-
413612	1302.91	1191.94	1181.13	900.014	812.014	934.835	1225.33	882.287	0.473338	0.00102327	0.0202106	LOC413612	NC_037645.1	6971030	6972077	-	864	protein_coding	uncharacterized protein C1orf50 homolog%2C transcript variant X1	-
726923	853.148	1076.77	1075.2	706.502	447.305	653.584	1001.71	602.463	0.73306	0.00109141	0.0211447	LOC726923	NC_037648.1	408426	414912	-	950	protein_coding	DNA polymerase epsilon subunit 3%2C transcript variant X3	-
413344	2219.69	2370.76	2417.56	1733.39	1770.98	1791.6	2336.01	1765.33	0.404287	0.00110288	0.0213216	LOC413344	NC_037648.1	9917400	9924509	-	5740	protein_coding	exportin-5	-
410784	474.57	541.193	527.758	329.518	327.165	392.35	514.507	349.678	0.557692	0.00116793	0.0224838	LOC410784	NC_037638.1	24085850	24087389	-	1467	protein_coding	putative GTP-binding protein 6	-
551720	3772.83	4532.72	4148.95	2593.24	2984.18	3182.84	4151.5	2920.09	0.507814	0.00117538	0.0225415	LOC551720	NC_037645.1	11986436	11993665	+	1580	protein_coding	activator of 90 kDa heat shock protein ATPase homolog 1	-
725049	922.176	909.167	908.344	719.281	550.281	622.556	913.229	630.706	0.53314	0.00119114	0.0226499	LOC725049	NC_037647.1	11850045	11851069	-	675	protein_coding	nuclear nucleic acid-binding protein C1D	-
726746	500.456	561.792	504.323	266.535	224.189	403.36	522.19	298.028	0.808957	0.00119145	0.0226499	LOC726746	NC_037652.1	7884183	7884744	-	478	protein_coding	HIG1 domain family member 2A%2C mitochondrial	-
413746	1265.16	1269.65	1302.99	805.996	1006.17	918.82	1279.27	910.328	0.491452	0.00119684	0.0227052	LOC413746	NC_037643.1	13355761	13357848	-	963	protein_coding	adrenodoxin	Fer2
725258	8714.84	10625.4	9271.86	3416.58	7390.72	4507.02	9537.35	5104.78	0.901855	0.0012017	0.0227499	LOC725258	NC_037643.1	15373592	15379377	+	2015	protein_coding	very-long-chain 3-oxoacyl-CoA reductase%2C transcript variant X2	adh_short
724125	820.791	1178.83	1106.14	745.752	418.343	583.521	1035.25	582.538	0.829071	0.00124184	0.0233645	LOC724125	NC_037652.1	9112225	9113498	-	806	protein_coding	28S ribosomal protein S7%2C mitochondrial%2C transcript variant X2	-
100577651	694.598	881.077	823.041	547.676	373.29	555.496	799.572	492.154	0.699676	0.00125231	0.0235129	LOC100577651	NC_037648.1	384874	386256	+	1111	protein_coding	three prime repair exonuclease 2%2C transcript variant X1	-
726800	756.077	864.223	923.343	621.612	552.427	605.541	847.881	593.193	0.515439	0.00127843	0.0238144	LOC726800	NC_037648.1	12414912	12416195	-	1114	protein_coding	probable RNA polymerase II nuclear localization protein SLC7A6OS	-
727483	2097.82	2490.61	2546.93	1745.26	1354.79	1726.54	2378.45	1608.86	0.563882	0.0012963	0.0240422	LOC727483	NC_037641.1	5505958	5508205	+	529	protein_coding	protein stunted%2C transcript variant X1	-
113218833	116.485	106.74	89.0534	66.6339	41.8343	51.0456	104.093	53.1712	0.962981	0.00131656	0.024319	LOC113218833	NC_037643.1	91907	92685	+	531	protein_coding	transmembrane protein 234 homolog	-
102656661	660.084	596.436	784.607	324.954	514.883	392.35	680.376	410.729	0.729349	0.00139553	0.0253763	LOC102656661	NC_037643.1	13690589	14052771	+	8048	protein_coding	uncharacterized LOC102656661%2C transcript variant X1	-
724580	124.035	220.971	149.985	90.3665	84.7412	87.0778	164.997	87.3951	0.918162	0.00139791	0.0253763	LOC724580	NC_037648.1	9448938	9455187	-	631	protein_coding	uncharacterized LOC724580	-
novel.306	64.7141	66.4787	83.4289	13.6919	39.6889	31.0277	71.5406	28.1362	1.35627	0.00140161	0.0253763	-	NC_037646.1	16288	25722	-	1060	-	-	-
410566	2195.97	3425.99	2907.83	856.2	1968.36	1502.34	2843.26	1442.3	0.979561	0.00142138	0.0256326	LOC410566	NC_037651.1	10645362	10651889	-	4003	protein_coding	putative inorganic phosphate cotransporter%2C transcript variant X1	MFS_1
100578380	626.648	639.506	606.5	431.751	456.959	470.42	624.218	453.043	0.462703	0.00145473	0.0261306	LOC100578380	NC_037651.1	5480288	5482034	-	1103	protein_coding	tRNA (guanine-N(7)-)-methyltransferase%2C transcript variant X1	-
552791	750.684	733.138	707.74	478.303	550.281	547.489	730.521	525.358	0.476094	0.00151276	0.0270135	LOC552791	NC_037648.1	11912857	11913779	-	808	protein_coding	MIP18 family protein galla-2	-
102654621	2.15714	40.2618	63.7435	0.912793	6.43604	4.00357	35.3875	3.78414	3.24525	0.00158998	0.028063	LOC102654621	NC_037643.1	3596246	3598527	-	2110	protein_coding	sarcoplasmic reticulum histidine-rich calcium-binding protein	-
551153	473.492	594.563	650.558	374.245	302.494	409.366	572.871	362.035	0.662134	0.00159995	0.0281427	LOC551153	NC_037647.1	6435057	6436852	-	1323	protein_coding	exodeoxyribonuclease%2C transcript variant X2	Exo_endo_phos
412100	611.548	746.247	770.546	512.989	361.491	483.432	709.447	452.637	0.647877	0.0016021	0.0281427	LOC412100	NC_037652.1	47233	49040	-	1008	protein_coding	ribonuclease H1	RnaseH
411947	795.984	895.122	951.465	666.339	466.613	596.533	880.857	576.495	0.611042	0.00160375	0.0281427	LOC411947	NC_037644.1	12361303	12363635	+	1364	protein_coding	PCI domain-containing protein 2%2C transcript variant X2	-
551671	253.464	346.438	301.844	140.57	66.5057	199.178	300.582	135.418	1.14928	0.0016189	0.0282997	LOC551671	NC_037638.1	15198586	15199661	+	710	protein_coding	probable oligoribonuclease	Exonuc_X-T
408570	712.934	729.393	708.677	418.972	566.372	484.433	717.001	489.925	0.550493	0.00163733	0.0285126	LOC408570	NC_037638.1	21787602	21807097	-	3480	protein_coding	uncharacterized LOC408570%2C transcript variant X1	-
724646	513.399	528.084	590.564	397.978	267.096	370.331	544.016	345.135	0.655418	0.00165702	0.0286913	LOC724646	NC_037651.1	5013428	5016398	-	2380	protein_coding	uncharacterized LOC724646%2C transcript variant X2	-
412409	1613.54	1886.68	2006.98	1388.36	1299.01	1076.96	1835.74	1254.78	0.549014	0.00168409	0.028995	LOC412409	NC_037648.1	15106088	15108696	+	1756	protein_coding	mitochondrial import inner membrane translocase subunit TIM44	-
100578035	998.755	1118.9	1209.25	716.542	775.543	854.763	1108.97	782.283	0.504007	0.00175455	0.0299708	LOC100578035	NC_037653.1	4900449	4902899	-	1475	protein_coding	sphingolipid delta(4)-desaturase DES1%2C transcript variant X1	-
410200	2316.77	2930.68	2486.93	1759.86	1862.16	1918.71	2578.13	1846.91	0.481437	0.00179613	0.0304642	LOC410200	NC_037647.1	10036100	10037678	+	1308	protein_coding	mRNA turnover protein 4 homolog	-
102654737	1565	1632.01	1617.96	1264.22	1020.11	1199.07	1604.99	1161.13	0.466675	0.00183437	0.0309974	LOC102654737	NC_037652.1	8209961	8211902	+	1308	protein_coding	peptide deformylase%2C mitochondrial	Pep_deformylase
411366	664.398	668.532	668.369	487.431	423.706	515.46	667.1	475.533	0.487822	0.00184608	0.0311376	LOC411366	NC_037647.1	10248366	10251500	+	1961	protein_coding	UPF0047 protein YjbQ	-
100578725	701.07	1077.7	927.092	555.891	537.409	632.565	901.955	575.288	0.649268	0.00185044	0.0311535	LOC100578725	NC_037652.1	1854621	1855852	-	666	protein_coding	uncharacterized LOC100578725	-
102654488	415.249	382.019	403.084	256.495	284.258	297.265	400.117	279.34	0.518786	0.00189009	0.0316651	LOC102654488	NC_037640.1	9857137	9858906	+	1043	protein_coding	mpv17-like protein	Mpv17_PMP22
727599	2763.29	2971.88	2763.47	1695.06	2252.61	2043.82	2832.88	1997.16	0.504631	0.0018936	0.0316651	LOC727599	NC_037646.1	1647665	1648662	+	824	protein_coding	NADH dehydrogenase [ubiquinone] iron-sulfur protein 4%2C mitochondrial	-
411707	490.749	549.62	558.693	393.414	225.261	338.302	533.02	318.992	0.739415	0.00194195	0.0322578	LOC411707	NC_037647.1	11907196	11911043	-	1887	protein_coding	probable glutamate--tRNA ligase%2C mitochondrial	-
410733	1415.08	2687.24	3383.09	633.478	703.674	1737.55	2495.14	1024.9	1.28377	0.00197787	0.0325593	LOC410733	NC_037638.1	8341631	8401769	-	2717	protein_coding	glucose dehydrogenase [FAD%2C quinone]%2C transcript variant X3	-
727221	218.949	203.181	277.472	172.518	94.3953	105.094	233.201	124.002	0.908371	0.00198234	0.0325593	LOC727221	NC_037648.1	14918600	14933522	+	10283	protein_coding	vacuolar protein sorting-associated protein 13C%2C transcript variant X1	-
novel.60	108.935	42.1344	95.6152	34.6861	26.8168	37.0331	82.2283	32.8453	1.31986	0.00198389	0.0325593	-	NC_037638.1	17937975	17943278	-	3270	-	-	-
724162	1060.23	1131.07	1293.62	859.851	455.886	720.643	1161.64	678.793	0.774504	0.00203707	0.0330714	LOC724162	NC_037639.1	6238738	6244108	+	1087	protein_coding	28S ribosomal protein S9%2C mitochondrial	-
551553	1123.87	865.16	981.462	744.839	680.075	600.536	990.163	675.15	0.551789	0.00207091	0.0333898	LOC551553	NC_037645.1	9354381	9367495	+	2907	protein_coding	facilitated trehalose transporter Tret1	Sugar_tr
102655778	587.82	622.653	681.493	465.524	419.415	467.417	630.655	450.786	0.484363	0.00208893	0.0335654	LOC102655778	NC_037638.1	2505276	2507841	-	1961	protein_coding	translation factor GUF1 homolog%2C mitochondrial	GTP_EFTU
413255	383.97	329.585	443.392	251.931	252.078	266.238	385.649	256.749	0.586979	0.00211768	0.0339014	LOC413255	NC_037638.1	25907513	25909440	-	1179	protein_coding	2-methoxy-6-polyprenyl-1%2C4-benzoquinol methylase%2C mitochondrial	-
727515	663.32	738.756	808.98	330.431	341.11	592.529	737.019	421.357	0.806969	0.00213352	0.0340356	LOC727515	NC_037639.1	1629539	1631402	+	1038	protein_coding	mitochondrial import inner membrane translocase subunit Tim29	-
100577449	179.042	213.481	208.104	129.617	71.8691	128.114	200.209	109.867	0.863415	0.00216151	0.0343619	LOC100577449	NC_037648.1	16048757	16052277	-	2637	protein_coding	PMS1 protein homolog 1	HMG_box
novel.259	153.157	76.7782	147.172	30.1222	67.5784	62.0554	125.702	53.252	1.24228	0.00217093	0.0344518	-	NC_037644.1	1038482	1068354	-	1090	-	-	-
412072	102.464	127.34	104.052	62.9827	52.561	72.0643	111.285	62.536	0.830878	0.00220015	0.0348547	LOC412072	NC_037641.1	11568572	11569457	+	621	protein_coding	DNA replication complex GINS protein PSF1	-
551532	1737.57	1983.13	2046.35	1330.85	869.938	1416.26	1922.35	1205.68	0.672785	0.00222174	0.035075	LOC551532	NC_037648.1	569152	570584	+	1111	protein_coding	ribosomal L1 domain-containing protein 1	-
725496	2166.84	2655.4	2805.65	1860.27	1673.37	1877.68	2542.63	1803.77	0.495402	0.00236253	0.0366538	LOC725496	NC_037638.1	25939293	25941662	-	1738	protein_coding	dimethyladenosine transferase 1%2C mitochondrial	-
100578704	95.9926	103.932	83.4289	61.1571	17.1628	34.0304	94.451	37.4501	1.32619	0.00236593	0.0366538	LOC100578704	NC_037644.1	11046091	11047462	-	1372	protein_coding	tubulin delta chain	Tubulin
410223	1096.9	1165.72	1104.26	835.205	762.671	892.797	1122.29	830.224	0.434727	0.00240504	0.0371966	LOC410223	NC_037647.1	7515330	7516716	+	1235	protein_coding	phosducin-like protein	-
552424	1815.23	1887.62	1955.42	1455.9	1353.71	1494.33	1886.09	1434.65	0.394666	0.00241922	0.0372895	LOC552424	NC_037651.1	5026809	5027738	+	695	protein_coding	NADH dehydrogenase [ubiquinone] 1 beta subcomplex subunit 10	-
409355	3042.64	3570.19	3192.8	2214.44	2516.49	2508.24	3268.54	2413.06	0.438019	0.00243854	0.0375239	LOC409355	NC_037652.1	3491262	3492418	+	805	protein_coding	glutaredoxin 3	-
412328	1402.14	1563.65	1579.53	989.467	1049.07	1228.1	1515.11	1088.88	0.476896	0.00249861	0.0379365	LOC412328	NC_037647.1	10322892	10323766	-	698	protein_coding	NADH dehydrogenase [ubiquinone] iron-sulfur protein 6%2C mitochondrial	-
100577901	734.505	1616.09	837.102	610.658	584.607	483.432	1062.57	559.566	0.925407	0.00250508	0.0379715	LOC100577901	NC_037645.1	8325100	8331073	-	1327	protein_coding	uncharacterized LOC100577901	-
408299	2284.41	1959.72	2155.09	1105.39	1768.84	1165.04	2133.07	1346.42	0.664124	0.00261506	0.039377	LOC408299	NC_037647.1	7500026	7509778	-	4111	protein_coding	purine nucleoside phosphorylase%2C transcript variant X2	-
724992	533.892	617.971	645.871	474.652	360.418	373.333	599.245	402.801	0.57251	0.00267692	0.0399785	LOC724992	NC_037638.1	2647416	2648436	+	910	protein_coding	RRP15-like protein	-
727199	1781.8	1866.09	2050.1	1106.3	1200.32	1564.4	1899.33	1290.34	0.557938	0.00268984	0.0401058	LOC727199	NC_037638.1	25125839	25127409	-	671	protein_coding	probable NADH dehydrogenase [ubiquinone] 1 alpha subcomplex subunit 12	Complex1_17_2kD
412286	984.733	969.091	1127.7	816.949	647.895	710.635	1027.17	725.16	0.501834	0.00272526	0.0405676	LOC412286	NC_037642.1	11954653	11956198	-	1463	protein_coding	probable malonyl-CoA-acyl carrier protein transacylase%2C mitochondrial	Acyl_transf_1
107965022	195.221	193.818	221.227	147.872	71.8691	112.1	203.422	110.614	0.87545	0.00280251	0.0413133	LOC107965022	NC_037647.1	8592135	8596955	+	3981	protein_coding	thyroid adenoma-associated protein homolog	-
100577362	1059.15	5572.98	4434.86	411.67	1215.34	585.523	3689	737.51	2.32265	0.00283896	0.0416487	LOC100577362	NC_037651.1	9814629	9815949	+	1132	protein_coding	uncharacterized LOC100577362	CBM_14
100576967	1145.44	1096.43	1100.51	726.583	821.668	895.8	1114.13	814.684	0.451858	0.00284353	0.0416488	LOC100576967	NW_020555859.1	300604	301615	+	688	protein_coding	histone deacetylase complex subunit SAP18	-
100576848	444.37	480.332	619.624	340.472	345.401	350.313	514.775	345.395	0.576436	0.00286586	0.0418985	LOC100576848	NC_037642.1	12215923	12218777	+	2493	protein_coding	uncharacterized LOC100576848	-
107963961	94.914	112.358	141.548	65.7211	38.6162	72.0643	116.273	58.8006	0.981619	0.00286976	0.0418985	LOC107963961	NC_037638.1	17896825	17899550	-	2637	protein_coding	condensin complex subunit 2-like	-
725062	2460.22	2586.12	2496.31	1530.75	1681.95	2096.87	2514.21	1769.86	0.506609	0.00288009	0.0419822	LOC725062	NC_037641.1	11567214	11568621	-	1223	protein_coding	39S ribosomal protein L4%2C mitochondrial	-
411176	424.956	233.144	205.291	73.9362	189.863	118.105	287.797	127.302	1.17815	0.00294404	0.0427776	LOC411176	NC_037643.1	7942770	7960889	+	2691	protein_coding	neurotrimin%2C transcript variant X1	I-set
100577923	1464.7	1994.36	1764.19	1348.19	967.551	1142.02	1741.08	1152.59	0.594944	0.00295478	0.0428655	LOC100577923	NC_037643.1	3698509	3699590	+	763	protein_coding	protein LLP homolog	-
408592	867.169	851.115	1113.64	464.611	636.095	701.626	943.973	600.778	0.652633	0.00301396	0.0435854	LOC408592	NC_037638.1	10929611	10935223	+	2026	protein_coding	uncharacterized LOC408592%2C transcript variant X2	-
100576457	1493.82	1688.18	1675.14	1038.76	1335.48	1070.96	1619.05	1148.4	0.496098	0.00307678	0.0442833	LOC100576457	NC_037653.1	1496832	1497717	+	636	protein_coding	probable ribosome biogenesis protein RLP24	-
552214	2559.44	2735.93	2703.47	2001.75	2012.34	2169.94	2666.28	2061.34	0.371352	0.00311894	0.0447388	LOC552214	NC_037645.1	5882799	5883927	+	965	protein_coding	nucleolar protein 16	-
100578237	107.857	99.2499	128.424	72.1106	65.4331	57.0509	111.844	64.8649	0.785122	0.00312313	0.0447388	LOC100578237	NC_037653.1	4522527	4528139	+	4380	protein_coding	uncharacterized protein PF11_0213	-
413576	3856.96	4894.14	3203.11	1609.25	3048.54	2245	3984.74	2300.93	0.792478	0.0031426	0.0449471	LOC413576	NC_037638.1	20487502	20492196	-	3211	protein_coding	facilitated trehalose transporter Tret1-2 homolog	Sugar_tr
727419	332.199	382.955	362.775	265.623	150.174	231.206	359.31	215.668	0.734685	0.00315792	0.0450956	LOC727419	NC_037638.1	2241599	2242631	-	738	protein_coding	ribonuclease P protein subunit p29	-
724675	2068.69	2518.7	2397.88	1481.46	1788.15	1762.57	2328.42	1677.39	0.473535	0.00337807	0.0477153	Cdc37	NC_037639.1	9626329	9628819	+	1793	protein_coding	cell division cycle 37 homolog	-
novel.13	32.3571	37.4528	49.6824	10.0407	21.4535	15.0134	39.8308	15.5025	1.37396	0.00338615	0.0477153	-	NC_037638.1	5240570	5242503	+	1169	-	-	-
100578853	465.942	573.028	492.137	382.46	245.642	345.308	510.369	324.47	0.652434	0.00340083	0.0477153	LOC100578853	NC_037650.1	9893187	9894427	+	953	protein_coding	probable transcriptional regulatory protein mhp472	-
410394	845.598	965.346	939.279	622.525	715.473	686.613	916.741	674.87	0.442734	0.00341458	0.0477632	LOC410394	NC_037649.1	10681873	10684414	+	1589	protein_coding	DCN1-like protein 5%2C transcript variant X1	-
100579038	182.278	208.799	205.291	136.006	136.23	125.112	198.79	132.449	0.586775	0.00341802	0.0477632	LOC100579038	NC_037650.1	4336241	4337034	-	537	protein_coding	succinate dehydrogenase assembly factor 3%2C mitochondrial%2C transcript variant X1	-
724158	65.7927	78.6509	93.7404	50.2036	24.6715	39.0349	79.3947	37.97	1.05919	0.00343645	0.0479321	LOC724158	NC_037651.1	6884574	6885496	-	757	protein_coding	mitotic spindle assembly checkpoint protein MAD2B	HORMA
726337	3300.42	3545.84	3416.84	1981.67	2275.14	2861.56	3421.03	2372.79	0.527978	0.0034406	0.0479321	LOC726337	NC_037642.1	11271301	11272888	+	1264	protein_coding	mitochondrial intermembrane space import and assembly protein 40-B%2C transcript variant X2	-
413591	529.577	603.926	762.109	453.658	243.497	396.354	631.871	364.503	0.792916	0.00350412	0.0485206	LOC413591	NC_037641.1	10218910	10222056	-	2255	protein_coding	nucleolar complex protein 2 homolog%2C transcript variant X2	-
113219418	101.385	141.384	119.988	52.942	15.0174	71.0635	120.919	46.341	1.38054	0.0035219	0.0486929	LOC113219418	NC_037638.1	10719813	10720840	+	675	protein_coding	uncharacterized LOC113219418	-
724798	265.328	303.368	240.913	176.169	96.5406	183.164	269.869	151.958	0.826537	0.00354	0.0488691	LOC724798	NC_037638.1	24279327	24281794	+	1721	protein_coding	tRNA (guanine(10)-N2)-methyltransferase homolog%2C transcript variant X1	-
100577168	899.526	910.103	895.221	466.437	750.871	545.487	901.617	587.598	0.618637	0.00364473	0.0499371	LOC100577168	NC_037643.1	15385274	15395615	-	2767	protein_coding	uncharacterized LOC100577168%2C transcript variant X2	-

## Sheet: 2Qvs2W_down
gene_id	2Q1	2Q2	2Q3	2w1	2w2	2w3	2Q	2w	log2FoldChange	pvalue	padj	gene_name	gene_chr	gene_start	gene_end	gene_strand	gene_length	gene_biotype	gene_description	tf_family
724838	121.878	167.601	136.861	1748.91	1474.93	1469.31	142.113	1564.38	-3.45839	1.9886e-72	1.8146e-68	LOC724838	NC_037647.1	3215237	3227471	-	2544	protein_coding	uncharacterized LOC724838	adh_short
725439	146.685	85.2051	80.6167	1211.28	953.607	902.806	104.169	1022.56	-3.30009	2.06677e-34	9.42966e-31	LOC725439	NC_037645.1	5123531	5133536	-	1814	protein_coding	uncharacterized LOC725439%2C transcript variant X1	-
409354	322.492	435.389	589.627	8258.04	3880.93	5382.81	449.169	5840.59	-3.70027	5.10062e-32	1.55144e-28	Hex70c	NC_037645.1	11864211	11868236	-	2190	protein_coding	hexamerin 70c	-
413264	4276.52	4442.84	3791.8	12019.7	14395.3	13100.7	4170.39	13171.9	-1.6592	2.22008e-29	5.06457e-26	LOC413264	NC_037645.1	12555229	12558191	+	1686	protein_coding	yellow-b	-
406088	26.9642	21.5354	36.5588	241.89	564.226	534.477	28.3528	446.864	-3.97663	1.43265e-25	2.17883e-22	Vg	NC_037641.1	5029485	5035661	-	5393	protein_coding	vitellogenin	Vitellogenin_N
100578046	539.284	421.344	386.21	1719.7	1521.05	1833.64	448.946	1691.46	-1.9149	4.45495e-24	5.80735e-21	LOC100578046	NC_037642.1	7426385	7431359	+	2119	protein_coding	probable G-protein coupled receptor Mth-like 1%2C transcript variant X1	7tm_2
725225	32.3571	26.217	14.0611	334.082	203.808	299.267	24.2117	279.052	-3.53639	5.239e-24	5.97574e-21	LOC725225	NC_037638.1	11527170	11528989	+	1529	protein_coding	ninjurin-2	-
410492	1471.17	1103.92	935.529	4821.37	4884.95	4460.98	1170.21	4722.44	-2.01327	1.27933e-23	1.2971e-20	LOC410492	NC_037651.1	5841564	5843322	-	1759	protein_coding	cytochrome P450 9e2	p450
408559	4235.54	3546.78	3618.38	10562.8	11007.8	9599.57	3800.23	10390.1	-1.45117	4.85958e-23	4.43437e-20	LOC408559	NC_037653.1	3185077	3188102	+	1943	protein_coding	retinal dehydrogenase 1	Aldedh
726352	1145.44	841.752	677.743	5581.73	4451.59	3785.38	888.312	4606.23	-2.37501	2.74241e-22	2.27495e-19	LOC726352	NC_037650.1	5993703	5997742	-	1962	protein_coding	transmembrane protease serine 11B-like protein	Trypsin
406147	18.3357	24.3443	17.8107	4086.57	1467.42	853.762	20.1636	2135.92	-6.72621	7.29417e-22	5.54661e-19	LOC406147	NC_037652.1	2619834	2629981	-	3398	protein_coding	short-chain dehydrogenase/reductase%2C transcript variant X1	adh_short
724536	1944.66	1268.71	1085.51	10086.4	6512.2	7509.71	1432.96	8036.09	-2.48786	1.06499e-20	7.47544e-18	LOC724536	NC_037638.1	6537540	6541325	-	2452	protein_coding	uncharacterized LOC724536	-
551670	34.5142	38.3891	15.9359	520.292	258.514	303.271	29.6131	360.692	-3.6103	1.38818e-20	9.04796e-18	LOC551670	NC_037638.1	11523225	11526267	-	1770	protein_coding	argininosuccinate lyase%2C transcript variant X2	-
412764	3200.11	3205.96	2640.67	8645.97	10728.9	8132.26	3015.58	9169.04	-1.60436	9.42884e-20	5.37739e-17	LOC412764	NC_037646.1	6934357	6946661	+	5083	protein_coding	MFS-type transporter SLC18B1	-
100578774	680.577	513.103	607.438	1652.15	2053.1	1867.67	600.373	1857.64	-1.62998	1.13183e-19	6.07526e-17	LOC100578774	NC_037646.1	9722542	9735421	+	4370	protein_coding	centrosomal protein of 164 kDa	WW
409203	4604.41	3755.58	4052.4	9882.81	11396.1	10205.1	4137.46	10494.7	-1.34292	3.61327e-19	1.83173e-16	LOC409203	NC_037648.1	10473951	10481235	+	2369	protein_coding	UDP-glucuronosyltransferase 2A3%2C transcript variant X2	UDPGT
726286	566.249	546.811	448.079	1710.57	1795.66	1384.24	520.379	1630.15	-1.64779	4.06474e-19	1.95214e-16	LOC726286	NC_037642.1	13459653	13465020	+	2980	protein_coding	uncharacterized LOC726286	Trypsin
727593	594.291	1011.23	836.164	3515.16	2794.31	3596.21	813.894	3301.9	-2.01987	2.17152e-18	9.90754e-16	LOC727593	NC_037648.1	10461904	10466548	+	1760	protein_coding	UDP-glucuronosyltransferase 2C1	UDPGT
552249	10506.3	10207.8	10432.4	25380.2	22521.8	21282	10382.2	23061.4	-1.15139	5.59258e-18	2.43011e-15	LOC552249	NC_037641.1	10203630	10210650	-	3326	protein_coding	lysosomal alpha-mannosidase%2C transcript variant X2	-
726592	7136.89	4191.9	6344.35	22739.5	18640.9	21628.3	5891.05	21002.9	-1.83407	3.86282e-16	1.46868e-13	LOC726592	NC_037647.1	6587620	6589278	-	1481	protein_coding	proteoglycan 4	-
550687	12528.7	9214.32	9606.52	31171	36812	26480.6	10449.8	31487.9	-1.59135	1.51334e-15	5.52368e-13	LOC550687	NC_037644.1	3498317	3504792	+	1976	protein_coding	aldehyde dehydrogenase%2C mitochondrial	Aldedh
410484	1678.25	1441.93	1874.81	3956.04	4268.17	5286.72	1665	4503.64	-1.43556	1.07106e-14	3.61448e-12	LOC410484	NC_037651.1	4710218	4779912	-	3742	protein_coding	trehalase%2C transcript variant X2	-
724312	14.0214	20.599	18.7481	160.652	91.1772	140.125	17.7895	130.651	-2.87224	1.1091e-14	3.61448e-12	LOC724312	NC_037644.1	8005369	8009486	-	1575	protein_coding	vanin-like protein 1	CN_hydrolase
727522	12039	5045.83	4801.38	65695.5	48402.2	37606.6	7295.4	50568.1	-2.79324	1.35353e-14	4.25895e-12	LOC727522	NC_037638.1	13311175	13319041	-	2126	protein_coding	uncharacterized LOC727522	-
413532	118.643	130.148	95.6152	457.309	325.02	365.326	114.802	382.552	-1.73792	1.0841e-13	3.1911e-11	LOC413532	NC_037653.1	1182982	1185296	+	1925	protein_coding	phospholipase A1%2C transcript variant X1	Lipase
551648	12869.5	13960.5	17178.9	74713.9	42054.2	44710.9	14669.6	53826.3	-1.87548	1.83604e-13	5.23559e-11	Hex110	NC_037648.1	13517503	13521591	-	3266	protein_coding	hexamerin 110%2C transcript variant X1	-
100576132	833.734	999.053	942.091	2122.24	1904	1891.69	924.959	1972.64	-1.09237	2.97891e-13	8.23713e-11	LOC100576132	NC_037638.1	24225576	24234141	+	4355	protein_coding	uncharacterized LOC100576132%2C transcript variant X2	-
100577943	400.149	644.188	429.331	2020.01	2061.68	1325.18	491.223	1802.29	-1.87487	6.94171e-13	1.82553e-10	LOC100577943	NC_037653.1	866134	872967	-	1924	protein_coding	scavenger receptor class B member 1	-
novel.313	267.485	246.252	310.281	769.484	1263.61	792.708	274.673	941.934	-1.77729	7.00205e-13	1.82553e-10	-	NC_037646.1	9772421	9777221	-	2479	-	-	-
102655714	46.3785	32.7712	42.1832	289.355	143.738	203.181	40.4443	212.092	-2.3951	1.22008e-12	3.09257e-10	LOC102655714	NC_037638.1	11522206	11523206	-	1001	pseudogene	PF00106:short chain dehydrogenase	adh_short
113218518	12.9428	9.3632	3.74962	80.3258	84.7412	72.0643	8.68521	79.0438	-3.20478	1.71092e-12	4.2195e-10	LOC113218518	NC_037652.1	5677334	5677995	-	437	protein_coding	chymotrypsin inhibitor-like	-
409768	929.726	853.924	899.908	1937.86	1704.48	1687.51	894.519	1776.61	-0.990357	2.9563e-12	7.09901e-10	LOC409768	NC_037644.1	3256993	3267288	+	2314	protein_coding	uncharacterized protein DDB_G0272420%2C transcript variant X5	-
410705	435.742	244.379	293.407	1109.04	1058.73	929.83	324.51	1032.53	-1.67157	5.61335e-12	1.28055e-09	LOC410705	NC_037638.1	17614947	17619197	+	3197	protein_coding	synaptic vesicle glycoprotein 2C%2C transcript variant X3	Sugar_tr
113219370	12.9428	9.3632	7.49923	87.6281	67.5784	67.0599	9.93508	74.0888	-2.91213	6.62184e-12	1.47376e-09	LOC113219370	NW_020555886.1	8785	19479	+	986	protein_coding	organic cation transporter protein-like	Sugar_tr
411057	377.499	302.431	301.844	724.757	946.098	775.693	327.258	815.516	-1.31794	1.11206e-11	2.41532e-09	Cyp314a1	NC_037642.1	13661266	13666787	-	3329	protein_coding	cytochrome P450 314A1%2C transcript variant X9	p450
725380	5962.33	2654.47	3043.75	18381.8	15811.2	14202.7	3886.85	16131.9	-2.05339	1.15038e-11	2.41532e-09	LOC725380	NC_037652.1	5675698	5677035	+	733	protein_coding	chymotrypsin inhibitor	-
552557	1428.02	1224.71	1274.87	2588.68	2595.87	2389.13	1309.2	2524.56	-0.947681	1.16465e-11	2.41532e-09	LOC552557	NC_037648.1	14008983	14013695	-	1654	protein_coding	lipoamide acyltransferase component of branched-chain alpha-keto acid dehydrogenase complex%2C mitochondrial	Biotin_lipoyl
novel.473	266.406	381.082	375.899	1057.01	1192.81	792.708	341.129	1014.18	-1.57073	1.73491e-11	3.51802e-09	-	NC_037652.1	3629416	3638087	-	8062	-	-	-
726424	104.621	78.6509	77.8045	273.838	341.11	225.201	87.0255	280.05	-1.68851	6.33998e-11	1.20526e-08	LOC726424	NC_037653.1	899072	980141	+	2975	protein_coding	metabotropic glutamate receptor%2C transcript variant X2	ANF_receptor
100578226	2445.12	2574.88	2235.71	5207.48	4229.55	5064.52	2418.57	4833.85	-0.99913	8.43797e-11	1.57136e-08	LOC100578226	NC_037640.1	2858935	2864968	+	3306	protein_coding	zinc finger protein GLI1	-
100577149	229.735	260.297	236.226	2660.79	743.363	1025.92	242.086	1476.69	-2.60895	1.56937e-10	2.8641e-08	LOC100577149	NC_037647.1	3206828	3210528	-	2517	protein_coding	15-hydroxyprostaglandin dehydrogenase [NAD(+)]	adh_short
726585	181.2	248.125	208.104	628.914	512.738	478.427	212.476	540.026	-1.34485	1.85603e-10	3.32084e-08	LOC726585	NC_037641.1	12162921	12165439	-	1891	protein_coding	dihydroceramide fatty acyl 2-hydroxylase FAH2%2C transcript variant X2	-
551986	553.306	411.044	285.908	2325.8	1287.21	1337.19	416.753	1650.07	-1.98623	2.07405e-10	3.63956e-08	LOC551986	NC_037647.1	9418835	9420442	+	1274	protein_coding	deoxyribose-phosphate aldolase	-
409667	608.313	504.676	578.378	1486.03	1172.43	1129.01	563.789	1262.49	-1.16376	2.14755e-10	3.69744e-08	LOC409667	NC_037652.1	5851689	5869613	+	4708	protein_coding	BCL2/adenovirus E1B 19 kDa protein-interacting protein 3%2C transcript variant X1	-
725460	90.5998	119.849	107.801	240.977	338.965	378.338	106.083	319.427	-1.58751	4.35346e-10	7.35653e-08	LOC725460	NC_037638.1	24293013	24383350	-	4576	protein_coding	hemicentin-1%2C transcript variant X4	V-set
408766	1361.15	1359.54	1237.37	2591.42	2312.68	2285.04	1319.35	2396.38	-0.861282	5.18351e-10	8.59991e-08	LOC408766	NC_037641.1	2839247	2864699	+	5898	protein_coding	phosphatidylcholine:ceramide cholinephosphotransferase 2%2C transcript variant X7	-
550965	323.571	448.497	290.595	1716.96	1406.27	798.713	354.221	1307.32	-1.88376	6.16697e-10	9.93428e-08	LOC550965	NC_037642.1	4218464	4221938	-	2234	protein_coding	probable cytochrome P450 6a14	p450
406152	1377.33	1471.89	1634.83	2628.84	2987.4	2740.45	1494.69	2785.56	-0.897779	6.72289e-10	1.0577e-07	LOC406152	NC_037646.1	7702860	7707410	+	1678	protein_coding	juvenile hormone epoxide hydrolase 1	EHN
410140	325.728	224.717	274.659	630.74	824.886	630.563	275.035	695.396	-1.33907	8.296e-10	1.28307e-07	LOC410140	NC_037644.1	3274454	3493372	+	7015	protein_coding	gamma-aminobutyric acid type B receptor subunit 2%2C transcript variant X2	-
100576484	226.499	270.596	274.659	508.426	604.988	536.479	257.252	549.964	-1.09431	1.04484e-09	1.58903e-07	LOC100576484	NC_037649.1	10523595	10572443	+	1822	protein_coding	caspase-1%2C transcript variant X2	Peptidase_C14
409643	3284.24	2499.97	2859.08	5380	5603.65	6144.49	2881.1	5709.38	-0.986872	1.17345e-09	1.75537e-07	LOC409643	NC_037640.1	8053539	8085030	-	3216	protein_coding	failed axon connections%2C transcript variant X1	-
102653658	120.8	147.939	110.614	305.786	377.581	287.256	126.451	323.541	-1.35401	1.69e-09	2.44782e-07	LOC102653658	NC_037638.1	4399364	4402583	+	1431	protein_coding	uncharacterized LOC102653658	-
411223	258.856	118.913	141.548	525.769	615.714	648.579	173.106	596.687	-1.78807	2.67227e-09	3.72087e-07	LOC411223	NC_037644.1	8761491	8768116	+	4063	protein_coding	esterase FE4%2C transcript variant X1	COesterase
410269	4525.67	3361.39	2913.45	10644.1	8215.6	7935.09	3600.17	8931.59	-1.31102	2.69126e-09	3.72087e-07	LOC410269	NC_037648.1	15692949	15701225	+	5457	protein_coding	probable multidrug resistance-associated protein lethal(2)03659	ABC_membrane
410993	193.064	197.563	184.669	382.46	391.526	371.332	191.765	381.772	-0.993368	2.83196e-09	3.85697e-07	LOC410993	NC_037641.1	12063429	12065028	-	969	protein_coding	valacyclovir hydrolase	Abhydrolase_1
724211	950.219	260.297	508.073	4214.36	2810.4	2221.98	572.863	3082.25	-2.42841	3.54778e-09	4.7608e-07	LOC724211	NC_037639.1	12317475	12319278	-	1804	protein_coding	cytochrome P450 9e2	p450
726887	668.713	578.646	546.506	1114.52	1090.91	1132.01	597.955	1112.48	-0.896496	3.93737e-09	5.20703e-07	LOC726887	NC_037652.1	2197270	2247124	+	5319	protein_coding	ras-related protein Rab-32%2C transcript variant X7	Ras
408342	907.076	897.931	820.228	1517.06	1455.62	1568.4	875.078	1513.69	-0.790871	4.61814e-09	6.02008e-07	LOC408342	NC_037648.1	2685587	2735133	+	7477	protein_coding	disco-interacting protein 2%2C transcript variant X6	AMP-binding
411959	26263.1	28397.6	27119.1	45252.6	42030.6	45241.4	27260	44174.9	-0.696439	5.33248e-09	6.85336e-07	LOC411959	NC_037645.1	1316771	1328467	+	8054	protein_coding	fatty acid synthase	Acyl_transf_1
100578347	475.649	227.526	378.711	1555.4	1055.51	1001.89	360.629	1204.27	-1.74071	6.36883e-09	8.07161e-07	LOC100578347	NC_037638.1	13292935	13294672	+	814	protein_coding	uncharacterized LOC100578347	-
551197	1630.8	1288.38	1204.56	4315.68	2643.07	3353.99	1374.58	3437.58	-1.32279	7.62939e-09	9.40786e-07	LOC551197	NC_037651.1	374523	378498	+	1719	protein_coding	probable cytochrome P450 6a13	p450
113219028	1958.68	1752.79	1531.72	3600.05	3124.7	3143.81	1747.73	3289.52	-0.912736	1.51802e-08	1.84692e-06	LOC113219028	NC_037647.1	5256076	5258537	-	1132	protein_coding	pancreatic triacylglycerol lipase-like	Lipase
724839	331.121	258.424	274.659	551.327	656.476	573.512	288.068	593.772	-1.04441	1.54324e-08	1.85291e-06	LOC724839	NC_037647.1	5958551	5959249	-	393	pseudogene	PF00071:Ras family	Ras
406066	295.528	167.601	191.23	1004.07	830.249	480.429	218.12	771.583	-1.82433	1.58628e-08	1.87985e-06	Jhe	NC_037640.1	9456503	9459237	+	2076	protein_coding	juvenile hormone esterase	COesterase
725970	142.371	159.174	159.359	331.344	401.18	299.267	153.635	343.93	-1.16088	1.63689e-08	1.89826e-06	LOC725970	NC_037646.1	10966627	10996569	+	10800	protein_coding	protein still life%2C isoform SIF type 1%2C transcript variant X13	RhoGEF
413697	471.335	1034.63	502.448	2540.3	2791.1	1797.61	669.472	2376.33	-1.82722	1.64342e-08	1.89826e-06	LOC413697	NC_037652.1	9432459	9438572	-	1951	protein_coding	PTS-dependent dihydroxyacetone kinase 1%2C dihydroxyacetone-binding subunit DhaK	-
725903	168.257	107.677	149.047	427.187	427.997	300.268	141.66	385.151	-1.44486	1.69189e-08	1.92982e-06	LOC725903	NC_037646.1	10117121	10119708	+	999	protein_coding	zinc finger protein 512B	-
726855	10326.2	7585.13	6870.23	22408.1	25511.4	15632	8260.53	21183.8	-1.3587	2.14137e-08	2.35421e-06	LOC726855	NC_037641.1	12392150	12393980	+	1388	protein_coding	vegetative cell wall protein gp1	-
408302	1449.6	1338.94	1359.24	3004	2330.92	2430.17	1382.59	2588.36	-0.905004	2.18636e-08	2.37506e-06	LOC408302	NC_037647.1	6496350	6510979	+	2394	protein_coding	solute carrier family 22 member 21	Sugar_tr
100576425	114.328	110.486	121.863	237.326	240.279	281.251	115.559	252.952	-1.12991	2.44365e-08	2.62333e-06	LOC100576425	NC_037638.1	26196910	26206490	-	3393	protein_coding	uncharacterized LOC100576425%2C transcript variant X1	-
413324	18292.5	17109.4	17025.1	26753	33297.9	33326.8	17475.7	31125.9	-0.832762	3.24577e-08	3.44391e-06	LOC413324	NC_037645.1	8992567	8995529	+	1825	protein_coding	chitinase-like protein Idgf4%2C transcript variant X1	-
408320	2303.82	1806.16	1716.39	3715.98	4584.61	3624.24	1942.12	3974.94	-1.03347	3.77213e-08	3.9564e-06	LOC408320	NC_037648.1	15763201	15767809	-	846	protein_coding	uncharacterized LOC408320	-
551259	7653.52	7890.37	7543.29	11992.3	12031.1	11395.2	7695.73	11806.2	-0.617408	7.0842e-08	7.26329e-06	LOC551259	NC_037644.1	8852924	9058966	+	79469	protein_coding	titin%2C transcript variant X30	I-set
113219014	33.4356	29.9622	27.1847	88.5409	101.904	88.0786	30.1942	92.8412	-1.62254	8.03019e-08	8.05225e-06	LOC113219014	NC_037646.1	9737972	9739276	-	1130	protein_coding	uncharacterized LOC113219014	-
100578042	361.321	244.379	191.23	623.437	1639.04	874.781	265.643	1045.75	-1.97754	8.70976e-08	8.63875e-06	LOC100578042	NC_037638.1	3967580	3980231	+	3163	protein_coding	nose resistant to fluoxetine protein 6%2C transcript variant X1	-
406155	200.614	193.818	163.108	412.582	338.965	378.338	185.847	376.628	-1.02082	1.24897e-07	1.22546e-05	PPO	NC_037651.1	6001332	6004996	+	2482	protein_coding	phenoloxidase subunit A3	-
551975	4076.99	2809.9	3294.04	6452.53	8315.36	6497.8	3393.64	7088.57	-1.06275	1.31859e-07	1.28001e-05	Tpx-4	NC_037646.1	2864435	2869887	-	1131	protein_coding	thioredoxin peroxidase 4	-
411609	281.506	156.365	203.417	459.135	742.29	581.519	213.763	594.315	-1.47639	1.4856e-07	1.42696e-05	LOC411609	NC_037643.1	1665445	1669870	+	1561	protein_coding	pancreatic triacylglycerol lipase%2C transcript variant X1	Lipase
412209	1134.65	968.155	790.231	2468.19	1784.93	1947.74	964.347	2066.95	-1.10047	1.52322e-07	1.44785e-05	LOC412209	NC_037650.1	10723047	10725867	+	1665	protein_coding	probable cytochrome P450 6a17	p450
413803	473.492	118.913	149.985	1423.04	1045.86	1220.09	247.463	1229.66	-2.31482	1.63501e-07	1.53809e-05	Grd	NC_037638.1	6428662	6469994	-	2763	protein_coding	GABA-gated ion channel%2C transcript variant X1	Neur_chan_LBD
406078	2203.52	2097.36	2196.34	3536.16	4157.68	5422.84	2165.74	4372.23	-1.01348	1.80247e-07	1.67832e-05	Tsf1	NC_037652.1	7734777	7737849	+	2313	protein_coding	transferrin 1	-
100577014	3271.3	2560.83	2217.9	5076.04	5179.94	5377.8	2683.34	5211.26	-0.95782	1.97664e-07	1.8219e-05	LOC100577014	NC_037648.1	10450824	10456693	+	4579	protein_coding	uncharacterized LOC100577014%2C transcript variant X1	-
102656088	60.3998	44.9434	45.9328	128.704	126.575	195.174	50.4253	150.151	-1.57773	2.1664e-07	1.93808e-05	LOC102656088	NC_037643.1	1670188	1681152	+	4338	protein_coding	uncharacterized LOC102656088	-
novel.178	89.5212	125.467	100.302	355.989	232.77	238.213	105.097	275.657	-1.39072	2.27129e-07	2.01219e-05	-	NC_037642.1	10024939	10029726	+	3328	-	-	-
410857	1868.08	1620.77	1665.77	3498.73	2700.99	3042.72	1718.21	3080.81	-0.842758	2.4789e-07	2.175e-05	LOC410857	NC_037639.1	11826715	11837150	+	922	protein_coding	protein lethal(2)essential for life	-
552592	563.013	644.188	649.621	2016.36	1014.75	1661.48	618.941	1564.2	-1.33767	2.87529e-07	2.49877e-05	LOC552592	NC_037651.1	8341131	8350218	+	3251	protein_coding	facilitated trehalose transporter Tret1%2C transcript variant X1	Sugar_tr
411140	592.134	531.83	673.056	1924.17	1265.75	1102.98	599.007	1430.97	-1.25662	2.97388e-07	2.56006e-05	LOC411140	NC_037643.1	17075160	17078082	+	2015	protein_coding	putative aldehyde dehydrogenase family 7 member A1 homolog	-
novel.481	301.999	210.672	277.472	572.321	494.502	728.651	263.381	598.491	-1.18531	3.46859e-07	2.95803e-05	-	NC_037652.1	9360512	9361785	-	1204	-	-	-
724971	2276.86	1831.44	1736.07	3918.62	3326.36	3443.07	1948.12	3562.68	-0.871244	3.52764e-07	2.98053e-05	LOC724971	NC_037641.1	7569503	7584219	-	7889	protein_coding	uncharacterized LOC724971%2C transcript variant X4	Trypsin
725154	163.942	169.474	140.611	317.652	326.093	286.256	158.009	310	-0.972733	3.72612e-07	3.11934e-05	LOC725154	NC_037638.1	24220597	24225506	-	3278	protein_coding	serine protease snake%2C transcript variant X1	Trypsin
726737	9.70712	5.61792	3.74962	41.0757	43.9796	37.0331	6.35822	40.6961	-2.69831	4.58599e-07	3.80429e-05	LOC726737	NC_037642.1	13084874	13089155	-	1460	protein_coding	venom acid phosphatase Acph-1%2C transcript variant X4	Acid_phosphat_A
408807	8.62855	6.55424	8.43664	24.6454	105.122	67.0599	7.87314	65.6091	-3.05804	5.02009e-07	4.05384e-05	LOC408807	NC_037641.1	8204758	8206134	+	976	protein_coding	uncharacterized LOC408807	-
410997	276.114	92.6957	125.612	431.751	761.598	802.717	164.807	665.355	-2.01545	5.1008e-07	4.08288e-05	LOC410997	NC_037641.1	12032154	12041456	+	5242	protein_coding	organic cation transporter 1%2C transcript variant X1	-
726321	564.091	986.881	723.676	1675.89	1603.65	1692.51	758.216	1657.35	-1.1276	5.66279e-07	4.45456e-05	LOC726321	NC_037647.1	10678813	10682149	+	1373	protein_coding	uncharacterized LOC726321	-
725928	1393.51	1181.64	1234.56	2125.89	2293.38	1970.76	1269.9	2130.01	-0.746384	5.74921e-07	4.48389e-05	LOC725928	NC_037653.1	3082662	3131948	-	6730	protein_coding	dedicator of cytokinesis protein 3%2C transcript variant X1	Ded_cyto
410996	212.478	75.8419	114.363	350.512	566.372	519.464	134.228	478.783	-1.83725	6.05758e-07	4.68436e-05	LOC410996	NC_037641.1	12041434	12043180	+	1437	protein_coding	tubulin beta chain	Tubulin
724386	44247.2	41134.4	45522.2	77256	70650.6	63977.1	43634.6	70627.9	-0.694771	6.50209e-07	4.98584e-05	LOC724386	NC_037642.1	6879277	6880564	+	662	protein_coding	NPC intracellular cholesterol transporter 2	-
100576248	923.255	893.249	733.987	1586.43	2014.48	1424.27	850.164	1675.06	-0.978444	6.90714e-07	5.2523e-05	LOC100576248	NC_037650.1	4436524	4439298	-	2626	protein_coding	balbiani ring protein 3	CBM_14
novel.78	697.834	821.153	863.349	1530.75	1256.1	1451.3	794.112	1412.72	-0.830814	7.22561e-07	5.44256e-05	-	NC_037639.1	15185678	15186776	+	1003	-	-	-
726798	155.314	124.531	140.611	284.791	389.38	267.239	140.152	313.803	-1.1631	7.27662e-07	5.44256e-05	LOC726798	NC_037639.1	2813134	2838943	+	3177	protein_coding	sn1-specific diacylglycerol lipase beta%2C transcript variant X1	Lipase_3
408955	4263.58	3965.31	3769.3	6782.05	7708.23	6001.36	3999.4	6830.55	-0.772242	7.47328e-07	5.5442e-05	LOC408955	NC_037645.1	12640038	12646425	-	2544	protein_coding	4-aminobutyrate aminotransferase%2C mitochondrial%2C transcript variant X1	Aminotran_3
726601	266.406	244.379	214.665	684.595	452.668	463.414	241.817	533.559	-1.14329	8.70743e-07	6.40769e-05	LOC726601	NC_037652.1	1875016	1882188	+	2546	protein_coding	transferrin%2C transcript variant X5	-
102654405	8135.64	7744.3	12324	20166.3	17651.9	23453.9	9401.33	20424.1	-1.11931	8.93169e-07	6.52013e-05	LOC102654405	NC_037638.1	13288347	13289647	+	907	protein_coding	uncharacterized LOC102654405	-
413508	2053.59	2024.32	2050.1	2992.13	3473.32	3126.79	2042.67	3197.41	-0.646319	9.9831e-07	7.16499e-05	LOC413508	NC_037641.1	5427569	5429370	+	1085	protein_coding	RNA-binding protein Rsf1	RRM_1
409821	3396.41	3119.82	3009.07	5830.92	5104.85	4770.26	3175.1	5235.34	-0.721646	1.05643e-06	7.41531e-05	LOC409821	NC_037639.1	15692317	15766954	+	29780	protein_coding	twitchin%2C transcript variant X3	Pkinase
412231	4730.6	4531.79	4855.75	8036.23	6853.31	7239.46	4706.05	7376.33	-0.648461	1.14601e-06	7.98268e-05	LOC412231	NC_037652.1	9056193	9060531	+	1597	protein_coding	trans-1%2C2-dihydrobenzene-1%2C2-diol dehydrogenase%2C transcript variant X2	GFO_IDH_MocA
100576129	306.314	290.259	309.343	535.809	517.029	481.43	301.972	511.423	-0.760469	1.27388e-06	8.73997e-05	LOC100576129	NC_037642.1	8898314	9109956	-	9857	protein_coding	uncharacterized LOC100576129%2C transcript variant X3	-
412858	35.5928	25.2806	27.1847	120.489	86.8865	74.0661	29.3527	93.8138	-1.68328	1.39933e-06	9.47232e-05	LOC412858	NC_037642.1	4169969	4215691	-	6978	protein_coding	hemicentin-2	-
726158	1936.03	1622.64	1781.07	2702.78	2918.74	2931.62	1779.91	2851.05	-0.679843	1.42553e-06	9.56468e-05	LOC726158	NC_037640.1	9439209	9444979	+	3026	protein_coding	glutathione hydrolase 1 proenzyme%2C transcript variant X4	-
724227	53.9284	75.8419	50.6198	157	175.918	129.115	60.1301	154.011	-1.35449	1.47581e-06	9.82976e-05	LOC724227	NC_037640.1	1293984	1306983	-	3198	protein_coding	synaptic vesicle glycoprotein 2B	Sugar_tr
408509	5218.12	3933.48	4457.36	7673.85	7701.79	7570.76	4536.32	7648.8	-0.753839	1.50674e-06	9.96301e-05	LOC408509	NC_037652.1	7716749	7719637	-	2369	protein_coding	glutamate decarboxylase 1	-
410498	267.485	224.717	210.916	441.792	474.122	398.356	234.373	438.09	-0.903735	1.54319e-06	0.000101307	LOC410498	NC_037651.1	7279756	7389256	+	13734	protein_coding	potassium voltage-gated channel subfamily H member 6%2C transcript variant X12	-
410117	1629.72	2081.44	1800.75	4485.46	2873.69	3746.35	1837.3	3701.83	-1.01066	1.59133e-06	0.000102374	LOC410117	NC_037640.1	10638468	10653437	+	3477	protein_coding	glycerophosphocholine phosphodiesterase GPCPD1%2C transcript variant X7	-
100576993	880.112	911.976	894.283	1505.2	1486.73	1297.16	895.457	1429.69	-0.674963	1.77735e-06	0.000112627	LOC100576993	NC_037641.1	24452	46179	-	4405	protein_coding	zinc finger protein 1%2C transcript variant X2	Homeobox
725078	90.5998	43.0707	94.6778	229.111	199.517	222.198	76.1161	216.942	-1.51363	1.80477e-06	0.000113576	LOC725078	NC_037638.1	17635699	17694551	+	4215	protein_coding	uncharacterized LOC725078%2C transcript variant X1	-
410743	74.4212	71.1603	64.6809	121.401	437.651	276.247	70.0875	278.433	-1.98925	1.82414e-06	0.000114009	LOC410743	NC_037638.1	6857911	6860106	-	2139	protein_coding	glucose dehydrogenase [FAD%2C quinone]	-
726001	19.4142	11.2358	42.1832	149.698	141.593	74.0661	24.2778	121.786	-2.32402	2.39275e-06	0.000147526	LOC726001	NC_037646.1	10134877	10136168	+	686	protein_coding	mantle protein-like	-
408563	940.512	766.846	921.468	1429.43	1412.71	1464.31	876.275	1435.48	-0.71244	2.48776e-06	0.000152354	LOC408563	NC_037653.1	6654600	6682385	+	5759	protein_coding	centrosomin%2C transcript variant X2	-
novel.292	23.7285	22.4717	25.3099	63.8955	68.6511	83.0742	23.8367	71.8736	-1.5915	2.64995e-06	0.000160137	-	NC_037645.1	7180301	7186212	-	738	-	-	-
411297	47.457	44.9434	31.8717	109.535	187.718	99.0885	41.424	132.114	-1.67363	2.78911e-06	0.000167438	LOC411297	NC_037646.1	11585175	11612673	+	7983	protein_coding	insulin-like peptide receptor%2C transcript variant X2	-
725074	3185.01	2696.6	2534.74	5351.7	5065.16	4222.77	2805.45	4879.88	-0.798795	3.02761e-06	0.000180568	LOC725074	NC_037642.1	3293169	3296782	+	688	protein_coding	omega-conotoxin-like protein 1	-
552081	560.856	566.474	574.629	1058.84	932.153	845.755	567.319	945.583	-0.737302	3.23784e-06	0.000191852	LOC552081	NC_037652.1	9439876	9448128	-	1881	protein_coding	calcium uptake protein 1 homolog%2C mitochondrial%2C transcript variant X1	-
410626	1841.12	2609.52	2190.71	4468.12	8007.51	4054.62	2213.78	5510.08	-1.3154	3.39676e-06	0.000199971	LOC410626	NC_037652.1	4693378	4705374	-	3997	protein_coding	sodium-coupled monocarboxylate transporter 1	-
410189	108.935	95.5046	126.55	273.838	196.299	242.216	110.33	237.451	-1.107	3.43604e-06	0.000200987	LOC410189	NC_037647.1	11283347	11287991	+	2309	protein_coding	5'-nucleotidase domain-containing protein 3%2C transcript variant X2	-
409465	2133.41	2312.71	1786.69	4151.38	3530.17	3274.92	2077.6	3652.16	-0.813953	3.56891e-06	0.000207428	LOC409465	NC_037646.1	2562383	2578398	-	2945	protein_coding	uncharacterized LOC409465	Perilipin
411564	179.042	240.634	142.485	371.507	917.136	477.426	187.387	588.69	-1.65064	3.67693e-06	0.000212355	LOC411564	NC_037640.1	3127999	3137002	+	3063	protein_coding	nose resistant to fluoxetine protein 6%2C transcript variant X2	-
411038	1335.27	1155.42	1068.64	1883.09	1923.3	1930.72	1186.44	1912.37	-0.689135	4.0122e-06	0.000229318	LOC411038	NC_037641.1	6467101	6557012	-	8150	protein_coding	uncharacterized LOC411038%2C transcript variant X2	UCH
725241	59.3213	62.7334	44.9954	207.204	112.631	145.13	55.6834	154.988	-1.48004	4.02092e-06	0.000229318	LOC725241	NC_037647.1	7747673	7803687	+	5038	protein_coding	uncharacterized LOC725241%2C transcript variant X2	Trypsin
726571	334.356	411.981	329.966	701.938	680.075	566.506	358.768	649.506	-0.855901	4.54937e-06	0.000257845	LOC726571	NC_037645.1	12143750	12146804	+	1429	protein_coding	venom acid phosphatase Acph-1	Acid_phosphat_A
408435	102.464	136.703	113.426	287.53	229.552	219.196	117.531	245.426	-1.0615	4.73217e-06	0.00026655	LOC408435	NC_037650.1	7679755	7874980	-	9903	protein_coding	POU domain%2C class 6%2C transcription factor 2%2C transcript variant X6	Pou
413942	761.47	676.959	716.177	1256.92	1144.54	1064.95	718.202	1155.47	-0.686583	4.94659e-06	0.000276918	LOC413942	NC_037648.1	14331563	14337488	+	2563	protein_coding	acyl-CoA synthetase short-chain family member 3%2C mitochondrial%2C transcript variant X2	AMP-binding
100576405	400.149	380.146	311.218	797.781	703.674	574.513	363.838	691.989	-0.928355	4.99222e-06	0.000277768	LOC100576405	NC_037645.1	979012	1164690	-	5053	protein_coding	AT-rich interactive domain-containing protein 5B%2C transcript variant X2	ARID
410254	2480.71	2065.52	2424.13	3297.92	6540.09	6792.06	2323.45	5543.36	-1.25445	5.69596e-06	0.000313106	LOC410254	NC_037648.1	13848442	13850983	+	1695	protein_coding	glutaryl-CoA dehydrogenase%2C mitochondrial	-
409595	2822.61	3171.32	3429.96	4647.03	6267.63	5375.8	3141.3	5430.15	-0.789437	6.06969e-06	0.000329678	LOC409595	NC_037648.1	14840591	14842246	+	1253	protein_coding	uncharacterized LOC409595	-
409787	3188.25	3762.13	3276.23	5295.11	5813.89	5026.49	3408.87	5378.5	-0.657783	6.43043e-06	0.000347205	LOC409787	NC_037643.1	4479594	4586178	+	3174	protein_coding	paramyosin%2C long form	Myosin_tail_1
113219121	292.292	241.571	219.353	423.536	509.52	451.403	251.072	461.486	-0.879175	6.47084e-06	0.000347332	LOC113219121	NC_037648.1	15380225	15386575	+	3118	protein_coding	uncharacterized LOC113219121%2C transcript variant X1	-
102655185	259.935	405.427	337.465	949.304	1011.53	527.471	334.276	829.435	-1.31033	6.64354e-06	0.000354517	LOC102655185	NC_037638.1	3212401	3219482	-	4464	protein_coding	serine-rich adhesin for platelets-like%2C transcript variant X4	-
727007	5667.88	4421.3	3792.74	8367.57	9388.04	7753.92	4627.31	8503.18	-0.877931	7.06766e-06	0.000371658	LOC727007	NC_037648.1	12923845	12931134	+	2882	protein_coding	alpha-tocopherol transfer protein%2C transcript variant X1	-
novel.65	593.213	222.844	599.001	1795.46	1201.39	1278.14	471.686	1425	-1.5956	7.10537e-06	0.000371658	-	NC_037638.1	24945477	24949779	-	4081	-	-	-
410853	297.685	249.061	271.847	430.838	534.191	475.425	272.864	480.151	-0.815482	7.1353e-06	0.000371658	LOC410853	NC_037639.1	11978778	12129219	+	13547	protein_coding	irregular chiasm C-roughest protein%2C transcript variant X2	-
409207	1541.27	1591.74	1589.84	2552.17	2182.89	2630.35	1574.29	2455.14	-0.641198	7.15029e-06	0.000371658	LOC409207	NC_037642.1	13303009	13325210	+	3122	protein_coding	synaptic vesicle membrane protein VAT-1 homolog-like%2C transcript variant X1	ADH_N
411347	901.683	1010.29	810.854	1444.04	1424.51	1488.33	907.609	1452.29	-0.678174	7.16842e-06	0.000371658	LOC411347	NC_037646.1	3893499	4152305	+	8938	protein_coding	peripheral plasma membrane protein CASK%2C transcript variant X3	Pkinase
410480	405.542	276.214	309.343	659.949	774.47	555.496	330.366	663.305	-1.00662	7.44211e-06	0.00038349	LOC410480	NC_037651.1	3948496	4123712	+	6394	protein_coding	trichohyalin%2C transcript variant X1	-
100577712	116.485	106.74	88.116	329.518	270.314	173.155	103.781	257.662	-1.31384	7.48068e-06	0.00038349	LOC100577712	NC_037643.1	6622974	6628963	-	2026	protein_coding	uncharacterized LOC100577712%2C transcript variant X2	-
725159	965.319	1843.61	1266.43	3628.35	2732.1	2778.48	1358.46	3046.31	-1.16488	7.86162e-06	0.000400767	LOC725159	NC_037650.1	10775949	10779935	-	1786	protein_coding	probable cytochrome P450 6a14	p450
410066	10993.9	10797.6	8954.08	16100.8	15791.9	15889.2	10248.5	15927.3	-0.63612	8.121e-06	0.000409415	GlnS	NC_037643.1	16823113	16843347	+	1870	protein_coding	glutamine synthetase%2C transcript variant X2	-
725245	614.784	535.575	571.816	900.014	991.15	861.769	574.059	917.644	-0.676994	9.03885e-06	0.000450707	LOC725245	NC_037648.1	15043990	15048642	-	3404	protein_coding	protein eiger%2C transcript variant X1	-
408264	1115.24	919.466	1014.27	1473.25	1811.75	1758.57	1016.33	1681.19	-0.726205	1.06043e-05	0.000524965	LOC408264	NC_037647.1	1179403	1227702	-	4834	protein_coding	netrin receptor UNC5C%2C transcript variant X2	-
413627	1714.92	1745.3	1948.86	2608.76	2902.65	3394.03	1803.03	2968.48	-0.719131	1.06431e-05	0.000524965	LOC413627	NC_037645.1	8235042	8238871	-	2126	protein_coding	uncharacterized LOC413627	-
409715	532.813	331.457	306.531	835.205	753.017	891.796	390.267	826.673	-1.08438	1.0913e-05	0.000535382	LOC409715	NC_037650.1	10785896	10811170	-	4246	protein_coding	bumetanide-sensitive sodium-(potassium)-chloride cotransporter%2C transcript variant X1	AA_permease
409187	1489.5	735.011	1077.08	2283.81	3405.74	2249.01	1100.53	2646.18	-1.26598	1.12236e-05	0.000544226	LOC409187	NC_037650.1	11188107	11191726	-	658	protein_coding	MD-2-related lipid-recognition protein	-
408455	1451.75	1033.7	1124.88	2586.85	1924.38	2167.94	1203.45	2226.39	-0.888106	1.13052e-05	0.000544226	LOC408455	NC_037651.1	6978746	7173933	+	8620	protein_coding	zinc finger protein rotund%2C transcript variant X3	-
727232	920.019	878.268	648.684	1497.89	1696.97	1314.17	815.657	1503.01	-0.882077	1.13295e-05	0.000544226	LOC727232	NC_037651.1	10017838	10028996	-	6089	protein_coding	uncharacterized LOC727232%2C transcript variant X7	C2
113218574	20902.7	11891.3	11971.6	38694.2	35961.4	26531.7	14921.8	33729.1	-1.17661	1.13318e-05	0.000544226	LOC113218574	NC_037650.1	4433366	4434702	-	1106	protein_coding	mucin-2-like	CBM_14
726210	3465.44	2761.21	2924.7	4437.09	5314.02	5446.86	3050.45	5065.99	-0.731905	1.18438e-05	0.000562889	LOC726210	NC_037644.1	2966047	2977924	+	5393	protein_coding	myogenesis-regulating glycosidase%2C transcript variant X1	Glyco_hydro_31
726526	492.906	311.795	302.781	927.397	912.845	626.559	369.161	822.267	-1.15661	1.19338e-05	0.000564228	NPF	NC_037650.1	4430259	4433365	+	979	protein_coding	neuropeptide F%2C transcript variant X1	-
408960	374.263	291.195	277.472	539.46	533.119	623.557	314.31	565.379	-0.848507	1.2409e-05	0.000583672	LOC408960	NC_037645.1	4556616	5047959	+	8588	protein_coding	protein slit%2C transcript variant X2	-
409143	71.1855	29.9622	31.8717	150.611	160.901	112.1	44.3398	141.204	-1.67911	1.26348e-05	0.000591242	LOC409143	NC_037641.1	12179118	12181902	-	1658	protein_coding	venom serine protease 34%2C transcript variant X2	Trypsin
494503	190.907	295.877	299.032	458.222	712.255	555.496	261.939	575.324	-1.13312	1.27363e-05	0.000592952	TpnCIIa	NC_037648.1	13515170	13517399	+	1175	protein_coding	troponin C type IIa	-
409798	13660.1	11656.2	13625.2	18942.3	22261.2	19572.5	12980.5	20258.6	-0.642191	1.37312e-05	0.000636028	Fabp	NC_037638.1	5372582	5374100	+	560	protein_coding	FABP-like protein	-
410353	23.7285	37.4528	26.2473	110.448	113.703	59.0527	29.1429	94.4013	-1.69213	1.39955e-05	0.000644994	LOC410353	NC_037649.1	46221	576852	+	7653	protein_coding	CUGBP Elav-like family member 4%2C transcript variant X11	RRM_1
409899	539.284	399.809	397.459	833.38	830.249	719.643	445.517	794.424	-0.835627	1.50375e-05	0.000689536	LOC409899	NC_037643.1	6522504	6532893	-	4468	protein_coding	putative sodium-dependent multivitamin transporter%2C transcript variant X1	-
409714	440.056	430.707	456.516	672.728	677.93	672.601	442.426	674.419	-0.608126	1.65598e-05	0.00075554	LOC409714	NC_037650.1	10827178	10885389	-	6227	protein_coding	serine-rich adhesin for platelets%2C transcript variant X2	Y_phosphatase
411155	335.435	292.132	271.847	565.931	480.558	487.435	299.805	511.308	-0.771865	1.72175e-05	0.00078164	LOC411155	NC_037643.1	12255714	12914327	+	15585	protein_coding	teneurin-a%2C transcript variant X3	-
726134	12087.5	10443.7	10019.9	15097.6	20231.7	20187	10850.4	18505.4	-0.770209	1.80972e-05	0.000817511	LOC726134	NC_037644.1	8750217	8757061	+	1790	protein_coding	carboxylesterase	COesterase
408539	348.378	337.075	380.586	533.984	687.584	582.52	355.346	601.362	-0.758129	2.0441e-05	0.000918836	LOC408539	NC_037652.1	4476716	4478796	-	1548	protein_coding	sideroflexin-3	-
551434	2768.69	2105.78	2641.6	3745.19	4285.33	4289.83	2505.36	4106.78	-0.71307	2.20273e-05	0.000985291	LOC551434	NW_020555859.1	459984	466478	-	1704	protein_coding	selenium-binding protein 1-like	-
107965038	1033.27	960.664	909.282	1414.83	1574.68	1399.25	967.738	1462.92	-0.596292	3.11808e-05	0.00135488	LOC107965038	NC_037647.1	10114771	10119467	+	2470	protein_coding	zinc transporter 2%2C transcript variant X1	-
413768	64.7141	55.2429	41.2458	137.832	155.538	99.0885	53.7343	130.819	-1.28659	3.31906e-05	0.00142637	LOC413768	NC_037646.1	8256011	8260771	-	3393	protein_coding	2-oxoglutarate dehydrogenase%2C mitochondrial	-
408450	170.414	219.099	195.917	404.367	336.819	316.282	195.143	352.49	-0.852405	3.32951e-05	0.00142637	GluCl	NC_037651.1	5177026	5214539	-	6468	protein_coding	glutamate-gated chloride channel%2C transcript variant X3	-
100576738	402.306	226.589	266.223	761.269	542.773	603.539	298.373	635.86	-1.09358	3.41101e-05	0.0014477	LOC100576738	NC_037651.1	3440250	3448435	-	1623	protein_coding	uncharacterized LOC100576738%2C transcript variant X1	-
409829	240.521	188.2	220.29	429.925	337.892	379.339	216.337	382.385	-0.823806	3.69319e-05	0.00154589	LOC409829	NC_037650.1	4440331	4451768	+	6649	protein_coding	F-box/LRR-repeat protein 20%2C transcript variant X1	-
724047	446.527	337.075	424.644	924.659	644.677	680.608	402.749	749.981	-0.898086	3.83243e-05	0.00159684	Mad	NC_037652.1	951021	1360467	-	10442	protein_coding	MAX dimerization protein%2C transcript variant X4	-
102656465	189.828	224.717	242.788	327.693	440.869	428.383	219.111	398.981	-0.862521	4.53338e-05	0.00186338	LOC102656465	NC_037646.1	397832	503779	+	2502	protein_coding	guanine nucleotide-binding protein G(o) subunit alpha%2C transcript variant X2	-
100577161	28.0428	10.2995	19.6855	128.704	51.4883	62.0554	19.3426	80.7492	-2.07216	4.614e-05	0.00188802	LOC100577161	NC_037648.1	4669692	4675098	+	1048	protein_coding	uncharacterized LOC100577161	-
725792	60.3998	64.6061	40.3084	141.483	152.32	101.09	55.1048	131.631	-1.25754	5.0356e-05	0.00205133	LOC725792	NC_037640.1	7390973	7456091	+	7469	protein_coding	MDS1 and EVI1 complex locus protein EVI1-B-like%2C transcript variant X2	-
413936	455.156	418.535	438.705	732.06	737.999	608.543	437.465	692.867	-0.663743	5.06177e-05	0.00205283	LOC413936	NC_037641.1	2760523	2801809	+	6515	protein_coding	uncharacterized LOC413936%2C transcript variant X1	-
724558	307.392	352.993	231.539	575.972	655.403	472.422	297.308	567.932	-0.933731	5.12516e-05	0.00206934	LOC724558	NC_037640.1	11672602	11674151	-	975	protein_coding	uncharacterized LOC724558	-
113218605	275.035	263.106	231.539	526.681	465.54	373.333	256.56	455.185	-0.828207	5.30146e-05	0.00213109	LOC113218605	NC_037639.1	12455924	12463188	-	3816	protein_coding	DNA ligase 1-like%2C transcript variant X1	-
412829	1796.9	630.143	1195.19	4232.62	2868.33	2591.31	1207.41	3230.75	-1.42032	5.89382e-05	0.00233064	LOC412829	NC_037638.1	6494980	6504439	+	3400	protein_coding	arylsulfatase B%2C transcript variant X2	Sulfatase
408826	3324.15	3756.52	3257.48	5160.93	4939.66	4846.33	3446.05	4982.31	-0.531844	5.90004e-05	0.00233064	LOC408826	NC_037642.1	5626811	5724219	+	5057	protein_coding	dystroglycan%2C transcript variant X4	-
726934	36.6713	29.9622	33.7465	94.0176	86.8865	65.0581	33.46	81.9874	-1.29605	5.99747e-05	0.00235892	LOC726934	NC_037646.1	11627673	11629903	+	1769	protein_coding	PI-PLC X domain-containing protein 1%2C transcript variant X1	-
408956	134.821	134.83	133.111	332.257	251.006	206.184	134.254	263.149	-0.972137	6.83671e-05	0.00266602	nanos	NC_037645.1	1204681	1212052	-	5398	protein_coding	protein nanos%2C transcript variant X2	-
408973	74.4212	66.4787	100.302	142.396	174.846	185.165	80.4007	167.469	-1.0565	7.02456e-05	0.00272762	LOC408973	NC_037645.1	9763948	9779071	-	4955	protein_coding	neprilysin-1%2C transcript variant X1	-
novel.189	21.5714	22.4717	29.9969	70.285	61.1424	61.0545	24.68	64.1606	-1.37614	7.36208e-05	0.00283456	-	NC_037642.1	6758207	6787133	-	1676	-	-	-
102655479	1560.69	1074.9	1467.04	2627.93	2379.19	2080.86	1367.54	2362.66	-0.789141	7.6465e-05	0.00293169	LOC102655479	NC_037647.1	8446184	8548814	-	12624	protein_coding	putative uncharacterized protein DDB_G0271606%2C transcript variant X6	-
409492	113.25	75.8419	83.4289	217.245	189.863	155.139	90.8402	187.415	-1.04897	7.91139e-05	0.00300798	LOC409492	NC_037640.1	663870	671505	-	2402	protein_coding	slowpoke-binding protein%2C transcript variant X5	-
724385	457.313	290.259	415.27	701.025	819.522	628.561	387.614	716.369	-0.886701	9.46765e-05	0.00355524	LOC724385	NC_037642.1	2720215	2761137	+	6159	protein_coding	uncharacterized LOC724385%2C transcript variant X2	-
100578955	868.248	814.598	797.731	1149.21	1396.62	1199.07	826.859	1248.3	-0.594133	0.000104187	0.00386785	LOC100578955	NC_037641.1	2619808	2633341	-	6194	protein_coding	myosin-7%2C transcript variant X6	-
411893	920.019	704.113	778.983	1267.87	1170.29	1491.33	801.038	1309.83	-0.710028	0.000104584	0.00386785	LOC411893	NC_037640.1	8138875	8141925	+	2400	protein_coding	cytochrome P450 315a1%2C mitochondrial%2C transcript variant X2	p450
726481	291.214	230.335	323.404	563.193	463.395	451.403	281.651	492.664	-0.807502	0.000104711	0.00386785	LOC726481	NC_037643.1	17778197	17781351	-	1022	protein_coding	inositol monophosphatase 2	-
551737	407.699	427.898	475.264	628.001	665.057	729.652	436.954	674.237	-0.625038	0.000106557	0.00388113	LOC551737	NC_037649.1	6775322	6824405	-	11573	protein_coding	synapsin%2C transcript variant X1	-
410824	3860.2	2526.19	2862.83	4377.75	6615.18	6610.9	3083.07	5867.94	-0.928558	0.000106659	0.00388113	LOC410824	NC_037639.1	13888598	13895956	+	3287	protein_coding	spondin-1%2C transcript variant X3	Kunitz_BPTI
552475	2872.23	2588.92	2134.47	4001.68	5895.41	3887.47	2531.87	4594.86	-0.859822	0.000106758	0.00388113	ACSF2	NC_037641.1	12339655	12345251	-	2945	protein_coding	acyl-CoA synthetase family member 2%2C transcript variant X1	AMP-binding
551432	345.142	288.387	344.027	596.966	551.354	464.415	325.852	537.578	-0.723031	0.000110715	0.00399319	LOC551432	NC_037645.1	1212925	1293035	-	10715	protein_coding	zinc finger and BTB domain-containing protein 20%2C transcript variant X10	-
551356	4342.32	5660.99	5170.72	7319.68	8007.51	7703.88	5058.01	7677.02	-0.601843	0.000116746	0.0041291	LOC551356	NC_037638.1	18299986	18408957	+	54003	protein_coding	nesprin-1%2C transcript variant X3	CH
408926	2618.76	2702.22	2499.12	5586.29	3910.97	3746.35	2606.7	4414.53	-0.760163	0.000117876	0.00415298	LOC408926	NC_037644.1	9617758	9627630	+	5773	protein_coding	alpha-2-macroglobulin-like protein 1%2C transcript variant X1	A2M_comp
409196	5568.65	5576.72	5582.24	7184.59	8076.16	8032.17	5575.87	7764.31	-0.477606	0.000119248	0.00418515	LOC409196	NC_037645.1	2153796	2160013	+	2541	protein_coding	alanine aminotransferase 1	Aminotran_1_2
413567	1429.1	1361.41	1888.87	2209.87	2865.11	3128.79	1559.79	2734.59	-0.809746	0.000120809	0.00422368	LOC413567	NC_037648.1	2379308	2382635	+	2238	protein_coding	L-xylulose reductase	adh_short
551913	1786.11	1644.18	1658.27	2837.87	2559.4	2247.01	1696.18	2548.09	-0.587359	0.000121546	0.00423324	LOC551913	NC_037649.1	8846718	8848902	-	1075	protein_coding	protein CREG1	-
725305	55.007	144.193	113.426	590.577	266.023	194.173	104.209	350.258	-1.74765	0.000122981	0.00426691	LOC725305	NC_037638.1	27575255	27577314	+	1527	protein_coding	uncharacterized LOC725305	-
408697	1670.7	1441.93	1391.11	2173.36	2156.07	2249.01	1501.25	2192.81	-0.546974	0.000125629	0.00434229	LOC408697	NC_037639.1	10328668	10377206	+	5990	protein_coding	KN motif and ankyrin repeat domain-containing protein 3%2C transcript variant X1	-
412883	135.9	51.4976	23.4351	344.123	311.075	183.164	70.2774	279.454	-1.99608	0.000129974	0.00447552	LOC412883	NC_037640.1	6376116	6447520	-	6904	protein_coding	Allatostatin C receptor%2C transcript variant X1	-
550930	601.841	637.634	539.007	973.95	1085.55	809.723	592.827	956.406	-0.689907	0.000132147	0.00453322	LOC550930	NC_037643.1	16065811	16104481	-	3529	protein_coding	TGF-beta receptor type-1%2C transcript variant X3	-
410925	1992.12	1371.71	1357.36	2306.63	3592.38	2970.65	1573.73	2956.55	-0.909872	0.00013299	0.00454506	LOC410925	NC_037640.1	11481577	11635945	+	10689	protein_coding	hormone receptor 4%2C transcript variant X9	zf-C4
100577268	438.977	453.179	395.584	582.362	762.671	736.658	429.247	693.897	-0.692425	0.000137767	0.00466872	LOC100577268	NC_037639.1	7814438	7838151	+	3016	protein_coding	uncharacterized LOC100577268%2C transcript variant X4	-
100577222	39.907	44.9434	49.6824	94.0176	94.3953	91.0813	44.8443	93.1647	-1.05215	0.000138131	0.00466872	LOC100577222	NC_037650.1	6696753	6716984	-	853	protein_coding	uncharacterized LOC100577222%2C transcript variant X1	-
408452	710.777	254.679	341.215	1113.61	1081.25	1031.92	435.557	1075.59	-1.30538	0.000139709	0.00470423	LOC408452	NC_037651.1	5789174	5791327	+	2154	protein_coding	cytochrome P450 9e2	p450
408867	5548.16	6711.54	4802.32	12155.7	8185.57	9510.49	5687.34	9950.57	-0.807065	0.000144267	0.00483983	LOC408867	NC_037643.1	1758208	1813707	-	5929	protein_coding	alpha%2Calpha-trehalose-phosphate synthase [UDP-forming]%2C transcript variant X5	-
410207	987.969	913.848	853.975	1795.46	1315.1	1360.21	918.597	1490.26	-0.698635	0.000152935	0.0050503	LOC410207	NC_037647.1	9474048	9480027	-	3862	protein_coding	dihydropyrimidine dehydrogenase [NADP(+)]	DHO_dh
726969	62.557	7.49056	27.1847	201.727	167.337	89.0795	32.4108	152.715	-2.24398	0.000153177	0.0050503	LOC726969	NC_037650.1	675640	680663	+	1252	protein_coding	farnesyl pyrophosphate synthase	-
413837	323.571	330.521	340.278	538.548	466.613	502.449	331.456	502.536	-0.60077	0.000153182	0.0050503	LOC413837	NC_037648.1	11071955	11097448	+	6739	protein_coding	kinesin 3B%2C transcript variant X3	Kinesin
102654111	195.221	147.939	166.858	336.821	288.549	264.236	170.006	296.535	-0.805094	0.000153308	0.0050503	LOC102654111	NC_037652.1	7719771	7722791	-	1999	protein_coding	platelet glycoprotein V%2C transcript variant X3	-
100577498	385.049	378.273	356.213	514.815	633.95	581.519	373.179	576.761	-0.627678	0.000158619	0.00520646	LOC100577498	NC_037644.1	13518514	13527808	-	5618	protein_coding	actin cytoskeleton-regulatory complex protein PAN1%2C transcript variant X3	-
726827	22.6499	27.1533	15.9359	70.285	108.34	41.0366	21.913	73.2206	-1.73923	0.000162415	0.00529462	LOC726827	NC_037641.1	12380965	12389002	+	4291	protein_coding	coiled-coil domain-containing protein 170%2C transcript variant X1	-
727078	297.685	412.917	382.461	678.205	566.372	582.52	364.354	609.032	-0.740409	0.000162465	0.00529462	LOC727078	NC_037647.1	12014483	12026628	-	1524	protein_coding	phospholipid phosphatase 3%2C transcript variant X1	-
410635	7340.74	7509.29	8039.18	10240.6	10654.9	10316.2	7629.73	10403.9	-0.447373	0.0001645	0.00532293	LOC410635	NC_037652.1	3039818	3048279	+	1625	protein_coding	fumarylacetoacetate hydrolase domain-containing protein 2A%2C transcript variant X1	FAA_hydrolase
552556	325.728	281.832	434.955	921.008	573.88	590.527	347.505	695.138	-1.0006	0.000168164	0.00542225	LOC552556	NC_037647.1	8699551	8701420	+	1312	protein_coding	arginase-1%2C transcript variant X1	-
novel.463	73.3427	58.0518	39.371	230.024	116.921	114.102	56.9218	153.682	-1.43788	0.000174239	0.0055787	-	NC_037652.1	5451901	5484792	+	3092	-	-	-
413736	693.52	906.358	751.798	1460.47	1927.59	1071.96	783.892	1486.67	-0.922962	0.000175772	0.00559535	LOC413736	NW_020555815.1	15727	21538	+	3108	protein_coding	serine/threonine-protein kinase SIK2%2C transcript variant X1	Pkinase
724860	154.235	136.703	120.925	261.059	323.947	203.181	137.288	262.729	-0.936948	0.000175985	0.00559535	LOC724860	NC_037643.1	13215874	13222443	+	1597	protein_coding	probable cytochrome P450 301a1%2C mitochondrial	p450
100578925	5252.63	4751.82	4283.94	7373.54	8237.06	6392.71	4762.8	7334.44	-0.622923	0.000179958	0.00570179	LOC100578925	NC_037640.1	8656849	8760447	-	13061	protein_coding	protein Tob1%2C transcript variant X3	-
551213	616.941	423.217	472.452	861.676	764.816	922.824	504.203	849.772	-0.754254	0.000182321	0.00575669	LOC551213	NC_037652.1	3481629	3490486	-	2620	protein_coding	lymphocyte cytosolic protein 2%2C transcript variant X1	SH2
102655090	469.177	362.356	463.078	763.095	718.691	619.553	431.537	700.446	-0.699495	0.000193018	0.0060318	LOC102655090	NC_037642.1	13480243	13480911	+	669	protein_coding	uncharacterized LOC102655090	-
novel.268	210.321	205.054	205.291	415.321	315.366	312.279	206.889	347.655	-0.750148	0.000195606	0.00609181	-	NC_037645.1	972050	978989	+	6573	-	-	-
724172	2583.17	2563.64	2253.52	4106.65	3531.24	3351.99	2466.78	3663.3	-0.570693	0.000200696	0.00618957	LOC724172	NC_037643.1	9764269	10200454	+	21049	protein_coding	neurobeachin%2C transcript variant X8	-
727455	491.827	404.49	411.52	901.839	638.241	675.603	435.946	738.561	-0.761855	0.000203614	0.00625581	LOC727455	NC_037647.1	11471796	11489311	+	1488	protein_coding	UBA-like domain-containing protein 2%2C transcript variant X1	-
409655	1813.07	1472.83	1645.14	2524.78	2558.33	2235	1643.68	2439.37	-0.569822	0.000207332	0.00634868	LOC409655	NC_037653.1	4968147	5078983	+	21772	protein_coding	sorbin and SH3 domain-containing protein 1%2C transcript variant X1	PDZ
551733	2000.74	1849.23	1952.61	2617.89	2829.71	2600.32	1934.2	2682.64	-0.47193	0.000208808	0.00637247	LOC551733	NC_037647.1	5697380	5741437	-	6473	protein_coding	amyloid-beta-like protein%2C transcript variant X2	-
408875	1868.08	1901.67	2023.86	3443.05	2521.85	2950.63	1931.2	2971.85	-0.622005	0.00021751	0.00661592	LOC408875	NC_037643.1	14242111	14268326	+	2475	protein_coding	heat shock protein beta-1%2C transcript variant X1	-
100577283	169.335	213.481	165.92	280.227	306.785	350.313	182.912	312.442	-0.77118	0.000220676	0.00668993	LOC100577283	NC_037645.1	10551206	10951318	+	5361	protein_coding	uncharacterized LOC100577283%2C transcript variant X2	-
100579019	17608.7	7541.12	8238.84	19766.5	35471.2	25516.8	11129.6	26918.2	-1.27422	0.000228902	0.00691632	LOC100579019	NC_037639.1	9021248	9021916	-	669	protein_coding	probable salivary secreted peptide	-
113218825	11.8643	0	4.68702	55.6804	26.8168	37.0331	5.51709	39.8434	-2.88206	0.000230351	0.00692673	LOC113218825	NC_037638.1	6437235	6439681	+	949	protein_coding	uncharacterized LOC113218825%2C transcript variant X2	-
413596	1197.21	1023.4	763.984	1675.89	1720.57	1587.42	994.864	1661.29	-0.740188	0.000230765	0.00692673	LOC413596	NC_037650.1	7252933	7281087	-	6243	protein_coding	receptor-type guanylate cyclase gcy-4%2C transcript variant X2	Pkinase_Tyr
551632	182.278	141.384	180.919	348.687	276.75	262.234	168.194	295.89	-0.81683	0.000236441	0.00707385	LOC551632	NC_037639.1	24139	31238	-	1576	protein_coding	methyl farnesoate epoxidase%2C transcript variant X1	p450
724603	2785.94	2338.93	2363.2	3653.91	3632.07	3452.08	2496.02	3579.35	-0.520295	0.000237221	0.007074	LOC724603	NC_037640.1	6253964	6319730	-	5228	protein_coding	receptor-type guanylate cyclase Gyc76C-like	Guanylate_cyc
412569	492.906	382.019	422.769	1120	712.255	642.574	432.565	824.942	-0.932369	0.000241502	0.00713383	LOC412569	NC_037647.1	8110582	8116557	-	3031	protein_coding	probable 2-oxoglutarate dehydrogenase E1 component DHKTD1 homolog%2C mitochondrial%2C transcript variant X1	-
novel.397	718.327	741.565	680.555	1032.37	1162.78	960.858	713.482	1052	-0.55997	0.000241573	0.00713383	-	NC_037649.1	3529905	3844735	+	6491	-	PF13857:Ankyrin repeats (many copies)|PF12796:Ankyrin repeats (3 copies)	-
408504	993.362	630.143	694.616	1339.98	1278.63	1330.19	772.707	1316.26	-0.769286	0.000244747	0.00718291	LOC408504	NC_037652.1	1364081	1371015	-	3389	protein_coding	protein FAM160B1%2C transcript variant X3	-
100577638	659.005	738.756	509.01	1074.36	926.79	1239.11	635.591	1080.08	-0.765232	0.000247913	0.0072275	LOC100577638	NC_037640.1	3145209	3177198	-	4106	protein_coding	uncharacterized LOC100577638%2C transcript variant X2	-
409034	1383.8	1621.71	1374.23	2322.14	2486.46	1924.72	1459.91	2244.44	-0.620305	0.000254468	0.00737149	LOC409034	NC_037639.1	15570667	15587165	-	11065	protein_coding	uncharacterized LOC409034	-
410428	321.413	538.384	457.453	896.362	1130.6	636.568	439.084	887.843	-1.01488	0.000255533	0.00737892	LOC410428	NC_037650.1	3964218	3974549	-	5534	protein_coding	uncharacterized LOC410428	-
409646	483.199	616.098	372.149	1342.72	758.38	886.792	490.482	995.963	-1.02226	0.000256516	0.00738395	LOC409646	NC_037638.1	11855131	11865607	-	2297	protein_coding	cationic amino acid transporter 3%2C transcript variant X4	-
552145	227.578	197.563	188.418	388.85	291.767	345.308	204.52	341.975	-0.743957	0.000258853	0.00742778	LOC552145	NC_037648.1	13223002	13226268	-	2805	protein_coding	repressor of RNA polymerase III transcription MAF1 homolog	-
100577043	101.385	56.1792	87.1786	141.483	214.535	172.154	81.5811	176.057	-1.11122	0.000263168	0.00750869	LOC100577043	NC_037638.1	23246496	23248301	+	1602	protein_coding	uncharacterized LOC100577043	-
411830	159.628	191.946	219.353	382.46	272.459	366.327	190.309	340.415	-0.838461	0.000268549	0.00761029	Acph-1	NC_037642.1	13090287	13099780	-	2901	protein_coding	venom acid phosphatase%2C transcript variant X1	Acid_phosphat_A
409736	4315.35	2813.64	3233.11	4975.63	6499.33	6264.59	3454.03	5913.18	-0.775751	0.000271503	0.00767018	LOC409736	NC_037650.1	10949823	10956772	-	2020	protein_coding	methylmalonate-semialdehyde dehydrogenase [acylating]-like protein%2C transcript variant X1	Aldedh
100578990	216.792	182.582	164.983	267.448	456.959	352.315	188.119	358.907	-0.93187	0.00028039	0.00787249	LOC100578990	NC_037651.1	2268015	2336388	-	9828	protein_coding	dynein intermediate chain 3%2C ciliary%2C transcript variant X8	-
102656669	89.5212	130.148	128.424	188.948	232.77	218.195	116.031	213.304	-0.874425	0.000282662	0.00791195	LOC102656669	NC_037638.1	12577483	12580393	+	1279	protein_coding	ctenidin-1-like%2C transcript variant X1	-
408976	3495.64	3127.31	2906.89	4687.19	4424.78	4402.93	3176.61	4504.97	-0.504218	0.000284242	0.00793184	LOC408976	NC_037646.1	12004649	12044817	-	8458	protein_coding	protein kinase shaggy%2C transcript variant X5	Pkinase
100576247	2293.04	1959.72	1972.3	2738.38	3131.13	3294.94	2075.02	3054.82	-0.558063	0.000290852	0.00804524	LOC100576247	NC_037647.1	2372224	2495006	+	10417	protein_coding	frizzled 2%2C transcript variant X4	-
107964994	30.1999	19.6627	35.6213	62.0699	68.6511	80.0715	28.4947	70.2642	-1.30279	0.000290951	0.00804524	LOC107964994	NC_037646.1	9739567	9741117	+	1350	protein_coding	uncharacterized LOC107964994	-
408809	301.999	329.585	296.22	506.6	478.412	428.383	309.268	471.132	-0.607311	0.000299052	0.00818244	LOC408809	NC_037641.1	7989171	8016620	+	8576	protein_coding	diacylglycerol kinase theta%2C transcript variant X1	-
413464	694.598	485.014	627.123	1087.14	910.7	943.843	602.245	980.56	-0.704152	0.00029911	0.00818244	LOC413464	NC_037647.1	3123636	3194289	-	5163	protein_coding	tyrosine-protein kinase Src64B%2C transcript variant X4	Pkinase_Tyr
413977	6155.39	6561.73	5767.85	8753.68	8597.48	8108.24	6161.66	8486.47	-0.461853	0.0002995	0.00818244	LOC413977	NC_037651.1	3016090	3032867	-	7198	protein_coding	calsyntenin-1	-
411556	31.2785	32.7712	56.2442	104.971	104.049	78.0697	40.098	95.6967	-1.2512	0.000301647	0.00821651	LOC411556	NC_037653.1	2840884	2847570	-	3865	protein_coding	cytosolic carboxypeptidase 2%2C transcript variant X2	-
411083	4923.67	6020.54	5099.48	7873.75	10378.1	7452.65	5347.89	8568.17	-0.679928	0.000304687	0.0082426	LOC411083	NC_037642.1	6883507	7002055	+	8299	protein_coding	sodium/potassium-transporting ATPase subunit alpha%2C transcript variant X6	-
100578236	46.3785	46.816	40.3084	76.6746	96.5406	104.093	44.5009	92.436	-1.05384	0.000316916	0.00853056	LOC100578236	NC_037644.1	3089715	3215807	+	5856	protein_coding	RNA-binding protein Musashi homolog 2	-
725127	220.028	177.901	180.919	294.832	346.473	301.269	192.949	314.192	-0.704411	0.000320504	0.00860176	LOC725127	NC_037642.1	4961399	4965323	-	3063	protein_coding	uncharacterized LOC725127%2C transcript variant X1	HLH
412936	577.034	599.245	578.378	934.7	903.191	760.679	584.886	866.19	-0.566567	0.000325767	0.00871736	LOC412936	NC_037650.1	10695641	10708942	-	4831	protein_coding	uncharacterized LOC412936	-
551847	994.44	986.881	915.844	1374.67	1896.49	1359.21	965.722	1543.46	-0.676246	0.000332936	0.00888316	LOC551847	NC_037652.1	3471482	3475098	+	1579	protein_coding	N-acetyl-D-glucosamine kinase%2C transcript variant X2	BcrAD_BadFG
724962	102.464	120.785	107.801	163.39	218.825	203.181	110.35	195.132	-0.819656	0.000334361	0.00889517	LOC724962	NC_037650.1	10469348	10533767	-	5390	protein_coding	uncharacterized LOC724962%2C transcript variant X5	-
413310	3562.51	3218.13	2879.7	5130.81	4268.17	4874.35	3220.12	4757.78	-0.56338	0.000353352	0.00937308	LOC413310	NC_037648.1	463094	512075	-	9098	protein_coding	F-actin-monooxygenase Mical%2C transcript variant X5	CH
102653835	75.4998	31.8349	53.432	178.907	95.4679	141.126	53.5889	138.5	-1.37615	0.000355155	0.00938946	LOC102653835	NC_037646.1	10084283	10086535	+	2073	protein_coding	uncharacterized LOC102653835	-
408770	820.791	847.369	818.354	1051.54	1880.4	1473.32	828.838	1468.42	-0.824691	0.000357536	0.00938946	LOC408770	NC_037641.1	13021636	13132929	-	8270	protein_coding	protein turtle%2C transcript variant X15	-
408981	1368.7	1547.74	1407.98	2368.7	2208.63	1852.65	1441.47	2143.33	-0.572266	0.000368215	0.0095999	LOC408981	NC_037646.1	11777130	11799422	-	3251	protein_coding	activating transcription factor 3%2C transcript variant X2	-
725283	1535.88	718.157	883.972	1769.91	2394.21	2278.03	1046	2147.38	-1.0381	0.000369396	0.00960324	LOC725283	NC_037638.1	23248289	23250912	-	1257	protein_coding	uncharacterized LOC725283	-
408427	4772.67	3837.04	4160.2	8268.08	5795.65	6404.72	4256.63	6822.82	-0.680807	0.000371953	0.00961492	LOC408427	NC_037650.1	5959237	5985060	-	12100	protein_coding	piezo-type mechanosensitive ion channel component%2C transcript variant X4	-
408884	623.413	639.506	671.181	848.897	971.842	945.845	644.7	922.195	-0.515841	0.000387692	0.0099095	LOC408884	NC_037643.1	9518925	9667691	+	6426	protein_coding	transcription factor Sox-13%2C transcript variant X2	HMG_box
408828	136.978	157.302	151.859	233.675	257.442	227.203	148.713	239.44	-0.685281	0.000399308	0.0101495	LOC408828	NC_037642.1	5761865	5778155	-	2729	protein_coding	uncharacterized MFS-type transporter C09D4.1%2C transcript variant X1	MFS_1
595137	348.378	276.214	281.221	478.303	460.177	457.408	301.938	465.296	-0.625548	0.000403921	0.0102383	uzip	NC_037640.1	4427155	4450061	-	2896	protein_coding	unzipped%2C transcript variant X2	-
102654781	15046	14655.3	16253.6	20379.9	21688.4	20104	15318.3	20724.1	-0.436033	0.000406597	0.0102775	LOC102654781	NC_037638.1	13302385	13304070	-	794	protein_coding	protein G12	-
725189	1872.4	1916.65	1872	2551.26	3447.57	2626.35	1887.01	2875.06	-0.607283	0.000412223	0.0103802	LOC725189	NC_037638.1	10231883	10452369	-	14936	protein_coding	protein bric-a-brac 2%2C transcript variant X8	-
726848	1777.48	2567.39	1520.47	7545.14	3408.96	3022.7	1955.11	4658.93	-1.2528	0.000419877	0.0105258	Hex70a	NC_037645.1	11848693	11852800	-	2591	protein_coding	hexamerin 70a	-
409676	173.65	161.047	196.855	261.972	302.494	287.256	177.184	283.907	-0.679151	0.00042127	0.0105318	LOC409676	NC_037650.1	10685094	10688915	-	2913	protein_coding	kinesin 2A	Kinesin
412243	3669.29	3873.56	3043.75	5607.29	9013.67	4947.42	3528.87	6522.79	-0.886238	0.000425608	0.0106111	LOC412243	NC_037640.1	12082455	12164657	-	17953	protein_coding	protein split ends%2C transcript variant X2	-
410373	155.314	105.804	110.614	256.495	188.791	242.216	123.911	229.167	-0.891086	0.000430856	0.0106836	LOC410373	NC_037649.1	8346817	8468219	+	5286	protein_coding	leucine-rich repeat-containing protein 15%2C transcript variant X2	-
413416	1003.07	982.2	995.523	1360.06	1342.99	1334.19	993.597	1345.75	-0.437767	0.000434028	0.0107331	LOC413416	NC_037640.1	1467274	1488220	+	5936	protein_coding	protein bicaudal C homolog 1-B%2C transcript variant X2	-
107965795	160.707	187.264	177.169	343.21	294.985	245.219	175.047	294.471	-0.750205	0.000442854	0.0108923	LOC107965795	NC_037648.1	4419527	4450562	-	2116	protein_coding	lactosylceramide 4-alpha-galactosyltransferase%2C transcript variant X4	Gly_transf_sug
413633	34.5142	29.9622	36.5588	78.5002	80.4505	61.0545	33.6784	73.3351	-1.12325	0.000448222	0.0109198	LOC413633	NC_037653.1	1536225	1585748	-	4763	protein_coding	serine/threonine-protein kinase BRSK2%2C transcript variant X1	Pkinase
411599	347.299	294.941	258.723	504.774	441.941	473.423	300.321	473.379	-0.658284	0.000448759	0.0109198	LOC411599	NC_037644.1	7967174	7995245	+	1903	protein_coding	uridine phosphorylase 1%2C transcript variant X2	-
novel.108	989.048	789.318	757.422	1407.53	1163.85	1343.2	845.263	1304.86	-0.627248	0.000452365	0.0109783	-	NC_037640.1	11861527	11942191	+	16841	-	-	-
724885	997.676	640.443	657.12	1875.79	1156.34	1307.17	765.08	1446.43	-0.919633	0.000458375	0.0110733	LOC724885	NC_037640.1	9937322	10035651	+	5352	protein_coding	zinc finger protein 395%2C transcript variant X2	-
410078	1645.9	1792.12	1474.54	2292.94	2415.66	2257.02	1637.52	2321.87	-0.503735	0.000458707	0.0110733	LOC410078	NC_037650.1	11144341	11179933	-	5652	protein_coding	echinoderm microtubule-associated protein-like 2%2C transcript variant X5	-
724618	987.969	718.157	637.435	1196.67	1363.37	1315.17	781.187	1291.74	-0.726184	0.000460928	0.0110976	LOC724618	NC_037638.1	14466267	14727561	-	5255	protein_coding	cysteine-rich motor neuron 1 protein%2C transcript variant X3	-
552604	2067.62	2030.88	1779.19	3307.05	2877.98	2561.29	1959.23	2915.44	-0.573635	0.000464571	0.0111558	LOC552604	NC_037643.1	16905031	16940067	-	8257	protein_coding	SLIT-ROBO Rho GTPase-activating protein 1%2C transcript variant X7	RhoGAP
413012	2633.86	2394.17	2186.03	4493.68	3303.83	3424.06	2404.69	3740.52	-0.637643	0.0004813	0.011497	LOC413012	NC_037642.1	13800215	13808455	+	3537	protein_coding	EH domain-containing protein 3	Acid_phosphat_A
726247	51.7713	46.816	59.9939	104.058	126.575	88.0786	52.8604	106.237	-1.00539	0.000491092	0.011671	LOC726247	NC_037649.1	11405644	11466368	-	4167	protein_coding	protein vestigial%2C transcript variant X3	-
725485	1569.32	1264.97	1429.54	2690.91	2142.13	1910.71	1421.28	2247.92	-0.661765	0.000495427	0.0117423	LOC725485	NC_037645.1	12656853	12679647	-	9645	protein_coding	regulator of G-protein signaling 11%2C transcript variant X9	RGS
408845	154.235	90.823	143.423	247.367	230.625	237.212	129.494	238.401	-0.882863	0.000498273	0.0117791	LOC408845	NC_037642.1	10443958	10467981	+	8861	protein_coding	protein unc-79 homolog%2C transcript variant X2	-
411212	340.828	302.431	287.783	474.652	572.808	430.384	310.347	492.615	-0.666808	0.000499628	0.0117806	LOC411212	NC_037644.1	11685736	11807792	+	5871	protein_coding	discoidin domain-containing receptor 2	-
724439	781.962	654.488	734.925	903.665	1334.41	1571.4	723.792	1269.82	-0.810893	0.000512468	0.0120213	LOC724439	NC_037645.1	12387152	12393402	+	3965	protein_coding	uncharacterized LOC724439	DUF229
552636	89.5212	83.3325	114.363	278.402	145.884	179.16	95.739	201.148	-1.07238	0.000533322	0.0124464	LOC552636	NC_037638.1	5314561	5321069	+	1715	protein_coding	dipeptidase 1%2C transcript variant X1	-
408871	18744.4	22565.3	20389.5	26351.4	32222	30770.5	20566.4	29781.3	-0.534085	0.00054964	0.012762	LOC408871	NC_037643.1	15330666	15336329	-	2302	protein_coding	sorbitol dehydrogenase	ADH_N
408489	3457.89	3074.87	2857.21	4300.17	4337.89	4430.96	3129.99	4356.34	-0.477115	0.000560002	0.0129076	EphR	NC_037651.1	9865919	9943024	+	12575	protein_coding	Eph receptor tyrosine kinase%2C transcript variant X1	Pkinase_Tyr
551250	6186.67	4930.66	4717.95	6930.83	8608.2	9441.43	5278.43	8326.82	-0.657705	0.000560733	0.0129076	LOC551250	NC_037650.1	10296741	10307538	+	3615	protein_coding	microsomal triglyceride transfer protein large subunit	Vitellogenin_N
408669	1842.2	1633.88	1576.71	2052.87	3390.72	3119.79	1684.26	2854.46	-0.761024	0.000562719	0.0129076	LOC408669	NC_037639.1	13880761	13888198	-	3206	protein_coding	uncharacterized protein KIAA0930 homolog%2C transcript variant X1	-
408551	19783.1	16234.9	17066.4	21818.5	31834.8	32446	17694.8	28699.8	-0.697714	0.000562982	0.0129076	LOC408551	NC_037653.1	6992891	7033121	+	6426	protein_coding	collagen alpha-5(IV) chain	-
408677	1803.37	1597.36	1726.7	2156.93	2663.45	3115.78	1709.14	2645.39	-0.630171	0.000594519	0.0135286	LOC408677	NC_037639.1	14687041	14722203	-	16552	protein_coding	titin%2C transcript variant X7	-
724328	416.328	342.693	365.588	548.588	569.59	536.479	374.869	551.552	-0.558007	0.000605468	0.0137094	LOC724328	NC_037638.1	6646192	6650235	+	1604	protein_coding	arrestin domain-containing protein 17	-
413021	3174.23	3401.65	3107.49	5902.12	4069.72	4901.38	3227.79	4957.74	-0.619243	0.000608484	0.0137286	LOC413021	NC_037642.1	5157589	5286950	-	11515	protein_coding	papilin%2C transcript variant X1	Kunitz_BPTI
412448	346.221	232.207	332.778	497.472	518.101	480.429	303.735	498.667	-0.716152	0.000609324	0.0137286	LOC412448	NC_037643.1	4786516	4789053	-	1425	protein_coding	zinc transporter ZIP1	-
410554	2536.79	2939.11	3036.25	3506.95	5028.69	4943.41	2837.38	4493.02	-0.662921	0.000645386	0.0144696	LOC410554	NC_037651.1	9760928	9764421	+	2510	protein_coding	methylcrotonoyl-CoA carboxylase beta chain%2C mitochondrial	Carboxyl_trans
413005	2238.03	1649.8	1968.55	2732.9	3071.06	2919.61	1952.12	2907.86	-0.575085	0.000649598	0.0144929	LOC413005	NC_037643.1	3962742	4005637	-	7101	protein_coding	protein NDRG3%2C transcript variant X2	Ndr
409649	349.456	202.245	193.105	414.408	480.558	512.458	248.269	469.141	-0.919962	0.00067129	0.0148983	LOC409649	NC_037647.1	10901729	10910479	-	3066	protein_coding	solute carrier organic anion transporter family member 5A1%2C transcript variant X3	-
552073	1651.29	1522.46	1564.53	1830.15	3336.01	3402.04	1579.42	2856.07	-0.854512	0.00067168	0.0148983	LOC552073	NC_037639.1	13873627	13880767	+	1965	protein_coding	arylsulfatase B	Sulfatase
409642	1503.52	1753.73	1926.37	3151.87	2265.49	2678.39	1727.87	2698.58	-0.643192	0.000676317	0.0149037	LOC409642	NC_037640.1	8047298	8054825	+	5444	protein_coding	uncharacterized LOC409642%2C transcript variant X1	-
409273	1176.72	1165.72	1169.88	1989.89	1543.58	1601.43	1170.77	1711.63	-0.54825	0.000677931	0.0149037	LOC409273	NC_037645.1	6508532	6519744	+	4201	protein_coding	midnolin-A%2C transcript variant X1	ubiquitin
100577544	80.8927	34.6438	63.7435	143.308	131.939	121.108	59.76	132.118	-1.14958	0.000679447	0.0149037	LOC100577544	NC_037652.1	4555010	4557277	-	1759	protein_coding	uncharacterized LOC100577544%2C transcript variant X2	-
410009	761.47	856.733	711.49	1038.76	1179.94	1134.01	776.564	1117.57	-0.52483	0.000685975	0.0150108	LOC410009	NC_037638.1	15000602	15079052	+	19781	protein_coding	cadherin-related tumor suppressor%2C transcript variant X1	Cadherin
410167	10918.4	5718.11	8013.87	11261.1	17925.4	18828.8	8216.77	16005.1	-0.961919	0.000733392	0.0158583	LOC410167	NC_037649.1	8107561	8114589	-	1279	protein_coding	sorbitol dehydrogenase	ADH_N
406112	17.2571	19.6627	14.0611	98.5816	33.2529	41.0366	16.9936	57.6237	-1.7663	0.000741974	0.0159682	Per	NC_037649.1	10032689	10051762	-	4330	protein_coding	period circadian protein%2C transcript variant X5	PAS
727246	641.748	869.841	776.17	1973.46	1111.29	1156.03	762.587	1413.59	-0.890456	0.000753028	0.016168	LOC727246	NC_037642.1	13264504	13277768	+	5307	protein_coding	protein spire%2C transcript variant X2	-
551643	18404.7	15478.3	14708.8	29384.6	20978.3	24543.9	16197.3	24968.9	-0.624428	0.00077048	0.0165038	Tret1	NC_037638.1	14292090	14310767	-	5357	protein_coding	trehalose transporter 1%2C transcript variant X2	Sugar_tr
410211	4862.19	5091.71	5406.95	6621.4	8211.31	6929.19	5120.28	7253.97	-0.502436	0.000787068	0.0167804	LOC410211	NC_037647.1	9169240	9237044	+	10602	protein_coding	four and a half LIM domains protein 2%2C transcript variant X4	LIM
724422	725.877	415.726	425.581	866.24	977.205	961.859	522.395	935.102	-0.840983	0.00079449	0.0168991	LOC724422	NC_037653.1	4494356	4511762	+	2561	protein_coding	homeobox protein Hox-B1a%2C transcript variant X1	Homeobox
411099	159.628	156.365	119.05	303.047	209.171	248.222	145.015	253.48	-0.808131	0.000829818	0.0175161	LOC411099	NC_037642.1	9847984	9864274	-	3337	protein_coding	protein yippee-like 1%2C transcript variant X1	-
409933	531.734	404.49	359.963	680.031	712.255	659.589	432.063	683.958	-0.663837	0.000830873	0.0175161	LOC409933	NC_037644.1	9570136	9604553	+	6939	protein_coding	glucose transporter type 1%2C transcript variant X3	-
408456	1836.8	1836.12	1700.45	2125.89	3722.18	3230.88	1791.13	3026.32	-0.756539	0.000838819	0.0176365	LOC408456	NC_037651.1	7199600	7207215	+	3427	protein_coding	facilitated trehalose transporter Tret1-2 homolog%2C transcript variant X1	-
725827	396.913	331.457	336.528	477.391	1101.64	605.541	354.966	728.189	-1.03631	0.00084269	0.0176771	InR-2	NC_037639.1	14542801	14593835	+	9214	protein_coding	insulin-like receptor-like%2C transcript variant X1	Pkinase_Tyr
724497	212.478	202.245	252.162	324.954	367.927	335.299	222.295	342.727	-0.623514	0.0008602	0.0179331	LOC724497	NC_037638.1	19353592	19360102	-	3623	protein_coding	protein patched homolog 3%2C transcript variant X2	-
413510	1173.48	1075.83	959.902	1409.35	1553.23	1832.64	1069.74	1598.41	-0.579539	0.000862816	0.0179331	LOC413510	NC_037647.1	2546343	2572211	+	10089	protein_coding	SNF-related serine/threonine-protein kinase	-
552313	1849.75	2188.18	1954.49	2611.5	2936.98	2785.49	1997.47	2777.99	-0.475584	0.000874791	0.0180599	LOC552313	NC_037648.1	8114746	8122087	-	2322	protein_coding	sterol O-acyltransferase 1	MBOAT
100577188	160.707	158.238	130.299	268.361	215.607	244.218	149.748	242.729	-0.69892	0.000878238	0.0180901	LOC100577188	NC_037647.1	4385173	4430815	-	1082	protein_coding	uncharacterized LOC100577188	-
408953	3789.01	3401.65	2783.15	5911.25	4577.1	4846.33	3324.6	5111.56	-0.620772	0.000910508	0.018587	LOC408953	NC_037644.1	885875	917307	-	6498	protein_coding	peroxidase%2C transcript variant X7	An_peroxidase
551868	98.1498	52.4339	83.4289	136.919	157.683	162.145	78.0042	152.249	-0.967684	0.000922667	0.0187932	LOC551868	NC_037638.1	23259023	23262334	-	2522	protein_coding	kelch-like protein 5	BACK
410944	803.534	653.551	644.934	1019.59	1061.95	967.864	700.673	1016.47	-0.537415	0.000953699	0.019296	LOC410944	NC_037640.1	6026250	6048719	+	7229	protein_coding	ATP-binding cassette sub-family C member Sur%2C transcript variant X1	ABC_membrane
410398	4758.65	7029.89	6109.06	9463.83	11688.9	8127.26	5965.87	9760	-0.710056	0.000957528	0.0193285	LOC410398	NC_037649.1	10759854	10829510	-	9423	protein_coding	insulin-like growth factor 2 mRNA-binding protein 1%2C transcript variant X1	KH_1
412878	567.327	808.98	567.129	1440.39	1073.75	895.8	647.812	1136.64	-0.811102	0.000963176	0.019359	LOC412878	NC_037649.1	4025468	4208180	-	14670	protein_coding	DNA N6-methyl adenine demethylase%2C transcript variant X4	-
552407	365.635	365.165	329.029	674.554	495.575	495.442	353.276	555.19	-0.653248	0.000982273	0.0196562	LOC552407	NC_037648.1	4983665	5009521	-	1639	protein_coding	UNC93-like protein MFSD11	-
550941	100.307	77.7145	98.4274	146.047	171.628	154.138	92.1496	157.271	-0.771716	0.00100734	0.0199825	LOC550941	NC_037652.1	877167	923047	+	2867	protein_coding	ABC transporter G family member 20	ABC_tran
409124	614.784	447.561	512.76	691.897	878.519	954.853	525.035	841.756	-0.681345	0.00103831	0.0204635	LOC409124	NC_037648.1	2510769	2519031	+	2852	protein_coding	twisted gastrulation protein homolog 1-A%2C transcript variant X3	-
408989	860.698	751.865	757.422	991.293	1326.9	1222.09	789.995	1180.09	-0.578904	0.00105143	0.0206774	LOC408989	NC_037646.1	11047528	11053471	+	1875	protein_coding	putative glycerol kinase 5	FGGY_N
412196	897.369	888.568	919.593	1243.22	1406.27	1148.03	901.843	1265.84	-0.488898	0.00105665	0.0206938	LOC412196	NC_037638.1	15120592	15123437	-	1749	protein_coding	uncharacterized LOC412196	-
412099	870.405	800.553	765.859	1350.93	992.223	1405.25	812.272	1249.47	-0.621836	0.0010568	0.0206938	LOC412099	NC_037643.1	5180849	5231591	+	2472	protein_coding	GRAM domain-containing protein 2B%2C transcript variant X1	GRAM
409095	218.949	252.806	239.975	355.989	376.508	328.293	237.244	353.597	-0.574522	0.00106691	0.020847	LOC409095	NC_037648.1	11837338	11853963	-	2645	protein_coding	LIM domain-containing protein A%2C transcript variant X1	LIM
113218903	161.785	101.123	104.052	228.198	225.261	201.18	122.32	218.213	-0.838807	0.00107168	0.0208891	LOC113218903	NC_037644.1	8849243	8852825	-	1815	protein_coding	uncharacterized LOC113218903%2C transcript variant X1	-
413428	481.042	325.839	374.962	617.961	620.005	607.542	393.948	615.169	-0.644321	0.00107364	0.0208891	LOC413428	NC_037648.1	15572654	15582091	+	8338	protein_coding	uncharacterized LOC413428	-
410793	4242.01	4488.72	4023.34	6501.82	5224.99	6182.52	4251.36	5969.78	-0.489836	0.00108534	0.0210717	LOC410793	NC_037639.1	15873807	15891407	+	13865	protein_coding	uncharacterized LOC410793	Vitellogenin_N
408393	279.349	285.578	221.227	393.414	497.72	373.333	262.051	421.489	-0.685474	0.00111895	0.0215864	LOC408393	NC_037649.1	10138913	10474973	+	13969	protein_coding	agrin%2C transcript variant X6	-
100577364	1925.25	1841.74	1975.11	2487.36	2495.04	2553.28	1914.03	2511.89	-0.392173	0.00117587	0.0225415	LOC100577364	NC_037648.1	15970835	15998435	-	15853	protein_coding	FERM%2C ARHGEF and pleckstrin domain-containing protein 1%2C transcript variant X3	RhoGEF
410509	5199.78	2525.25	3651.19	13073	6624.83	5597	3792.07	8431.61	-1.15294	0.00118017	0.0225765	LOC410509	NC_037651.1	7693270	7711431	+	9792	protein_coding	mucin-2%2C transcript variant X1	CBM_14
550998	836.969	795.872	834.289	1077.1	1348.35	1105.99	822.377	1177.14	-0.517097	0.00118758	0.0226499	LOC550998	NC_037647.1	6368455	6373447	-	2462	protein_coding	carbohydrate sulfotransferase 11%2C transcript variant X2	-
novel.83	2794.57	2011.22	2484.12	3410.19	3647.09	3628.24	2429.97	3561.84	-0.551851	0.00123053	0.0232475	-	NC_037639.1	1249336	1255778	-	763	-	PF11901:Protein of unknown function (DUF3421)	-
413829	129.428	83.3325	109.676	219.983	157.683	203.181	107.479	193.616	-0.852918	0.00123667	0.0233153	LOC413829	NC_037640.1	10053870	10140657	+	6590	protein_coding	diuretic hormone receptor%2C transcript variant X1	-
725621	6384.05	3866.06	3197.48	7224.75	8113.7	9036.07	4482.53	8124.84	-0.858141	0.00126761	0.0237514	LOC725621	NC_037651.1	5793132	5801004	-	5533	protein_coding	uncharacterized LOC725621	p450
724237	1618.93	2322.07	1856.06	2486.45	3516.22	3318.96	1932.35	3107.21	-0.684956	0.00127774	0.0238144	LOC724237	NC_037638.1	16651286	16671767	-	5395	protein_coding	prostaglandin E2 receptor EP3 subtype%2C transcript variant X3	7tm_1
410920	348.378	386.7	413.395	523.943	727.273	546.488	382.824	599.234	-0.645153	0.0012788	0.0238144	LOC410920	NC_037640.1	11991153	11996214	+	2555	protein_coding	putative inorganic phosphate cotransporter	MFS_1
411173	877.955	880.141	830.54	1102.65	1185.3	1206.08	862.878	1164.68	-0.432613	0.00129061	0.0239854	LOC411173	NC_037643.1	8913923	8936198	+	3750	protein_coding	torso-like protein%2C transcript variant X3	-
725106	528.499	380.146	434.018	790.478	681.148	620.554	447.554	697.393	-0.641186	0.00130937	0.0242353	LOC725106	NC_037638.1	23159952	23167829	+	2952	protein_coding	UDP-glucuronosyltransferase 1-8	UDPGT
413550	105.7	96.4409	119.05	175.256	197.372	158.141	107.064	176.923	-0.723754	0.00132095	0.0243509	LOC413550	NC_037650.1	4809347	4833438	+	4972	protein_coding	neuropeptide CCHamide-2 receptor	7tm_1
100576615	738.82	725.648	678.68	953.868	967.551	967.864	714.383	963.095	-0.431179	0.00133762	0.0246084	LOC100576615	NC_037651.1	5223232	5241320	+	3830	protein_coding	J domain-containing protein DDB_G0295729%2C transcript variant X1	-
726331	59.3213	34.6438	59.9939	97.6688	95.4679	116.104	51.3197	103.08	-1.00895	0.00134483	0.0246913	LOC726331	NC_037652.1	4768486	4881872	+	11935	protein_coding	alpha-2A adrenergic receptor	-
102656154	20.4928	12.1722	19.6855	136.006	31.1075	37.0331	17.4501	68.0489	-1.96921	0.0013699	0.025054	LOC102656154	NC_037645.1	2673333	2685105	-	3339	protein_coding	uncharacterized LOC102656154%2C transcript variant X1	-
100577047	149.921	142.321	111.551	249.192	311.075	179.16	134.598	246.476	-0.873158	0.00137007	0.025054	LOC100577047	NC_037640.1	5689369	5700450	+	6087	protein_coding	uncharacterized LOC100577047%2C transcript variant X1	-
100576192	1263	844.561	883.034	3094.37	1164.92	2030.81	996.866	2096.7	-1.07308	0.0013968	0.0253763	LOC100576192	NC_037646.1	10090060	10093987	+	2081	protein_coding	uncharacterized LOC100576192%2C transcript variant X1	-
410044	1527.25	1301.48	1297.37	1763.52	2283.72	1959.75	1375.37	2002.33	-0.541883	0.00139951	0.0253763	LOC410044	NC_037640.1	6927975	7099161	+	6900	protein_coding	rho GTPase-activating protein 20%2C transcript variant X2	RhoGAP
727237	929.726	1168.53	1191.44	1577.31	1468.49	1826.63	1096.56	1624.14	-0.566331	0.00141658	0.0255966	LOC727237	NC_037649.1	2451558	2485634	-	1880	protein_coding	carbonic anhydrase 2	-
100578810	221.107	113.295	129.362	240.064	345.401	319.285	154.588	301.583	-0.966225	0.00144781	0.0260578	LOC100578810	NC_037642.1	5542342	5617320	+	3499	protein_coding	facilitated trehalose transporter Tret1-2 homolog%2C transcript variant X1	-
725366	269.642	164.792	190.293	320.39	351.837	386.345	208.242	352.857	-0.762824	0.00147617	0.0264638	LOC725366	NC_037644.1	8679327	8687569	+	2169	protein_coding	anosmin-1%2C transcript variant X1	-
100576476	22.6499	7.49056	9.37404	43.814	41.8343	36.0322	13.1715	40.5602	-1.64012	0.00149499	0.0267485	LOC100576476	NC_037641.1	4231188	4235724	+	2505	protein_coding	uncharacterized LOC100576476	-
410694	118.643	91.7593	81.5541	144.221	171.628	202.181	97.3187	172.677	-0.829394	0.0015347	0.0273502	LOC410694	NC_037638.1	27246186	27312388	+	3935	protein_coding	transcription factor collier%2C transcript variant X1	-
725529	863.934	385.764	1227.06	2452.67	1273.26	2087.86	825.586	1937.93	-1.23118	0.00153761	0.0273502	LOC725529	NC_037642.1	260704	263801	-	1628	protein_coding	kynurenine/alpha-aminoadipate aminotransferase%2C mitochondrial%2C transcript variant X2	Aminotran_1_2
100577456	3968.05	4072.99	3713.99	4778.47	5530.7	5694.08	3918.35	5334.42	-0.445026	0.00156504	0.0277841	LOC100577456	NC_037648.1	11397504	11424515	-	10577	protein_coding	fibrillin-2%2C transcript variant X1	EGF_CA
100859932	110.014	149.811	124.675	256.495	174.846	231.206	128.167	220.849	-0.784889	0.00157051	0.0278271	LOC100859932	NC_037646.1	8607215	8617922	+	10076	protein_coding	uncharacterized LOC100859932	-
novel.105	117.564	123.594	110.614	314.001	178.064	175.156	117.257	222.407	-0.925372	0.00158433	0.0280174	-	NC_037640.1	10038792	10041552	+	1697	-	-	-
113218579	217.871	211.608	201.542	273.838	352.91	334.298	210.34	320.349	-0.606164	0.00160859	0.0281734	LOC113218579	NC_037651.1	9758491	9760630	-	1115	protein_coding	uncharacterized LOC113218579%2C transcript variant X2	-
725325	2996.26	3909.14	3333.41	4874.31	4879.59	4628.13	3412.94	4794.01	-0.490081	0.00162269	0.0283118	LOC725325	NC_037639.1	9451803	9459503	-	3503	protein_coding	glucose-6-phosphate 1-dehydrogenase%2C transcript variant X1	G6PD_C
412927	48.5356	59.9245	61.8687	136.006	95.4679	93.0831	56.7762	108.186	-0.929946	0.00164067	0.0285163	LOC412927	NC_037651.1	3364830	3380149	+	6215	protein_coding	uncharacterized LOC412927%2C transcript variant X2	-
413383	66.8713	51.4976	55.3068	106.797	131.939	88.0786	57.8919	108.938	-0.913575	0.00165128	0.0286463	LOC413383	NC_037644.1	2241032	2262071	-	3979	protein_coding	carbonic anhydrase-related protein 10%2C transcript variant X2	-
411282	222.185	172.283	194.043	308.524	335.747	270.241	196.17	304.837	-0.637103	0.00167625	0.0289693	LOC411282	NC_037645.1	8446637	8460282	+	6746	protein_coding	basic-leucine zipper transcription factor A%2C transcript variant X1	-
102654165	797.062	759.355	626.186	945.653	1137.03	1103.99	727.534	1062.22	-0.546095	0.00168189	0.028995	LOC102654165	NC_037650.1	3534958	3582929	+	6684	protein_coding	transmembrane protein 132C%2C transcript variant X1	-
413134	481.042	455.988	363.713	960.258	583.534	659.589	433.581	734.46	-0.761435	0.00169131	0.0290645	LOC413134	NC_037648.1	9938043	9979658	+	3616	protein_coding	UNC93-like protein	-
100576882	177.964	176.028	195.917	351.425	318.584	231.206	183.303	300.405	-0.712877	0.00172245	0.0295439	LOC100576882	NC_037647.1	9894788	9925239	-	12467	protein_coding	uncharacterized LOC100576882	-
725218	119.721	88.9504	105.927	166.128	175.918	169.151	104.866	170.399	-0.702408	0.00174491	0.029873	LOC725218	NC_037643.1	9727323	9760616	+	4424	protein_coding	growth arrest-specific protein 2%2C transcript variant X1	CH
409722	7590.97	7546.74	7141.14	10986.4	10148.6	9015.05	7426.28	10050	-0.436523	0.00175719	0.0299708	LOC409722	NC_037645.1	7005625	7159336	-	17671	protein_coding	basement membrane-specific heparan sulfate proteoglycan core protein%2C transcript variant X33	Laminin_G_2
551428	1097.98	983.136	982.399	1379.23	1419.15	1321.18	1021.17	1373.19	-0.427615	0.00177336	0.0301901	LOC551428	NC_037651.1	5995932	6000910	+	2505	protein_coding	facilitated trehalose transporter Tret1-2 homolog%2C transcript variant X1	Sugar_tr
100642173	141.293	134.83	130.299	191.686	270.314	203.181	135.474	221.727	-0.70965	0.00179059	0.0304266	LOC100642173	NC_037646.1	9531281	9537447	-	2663	protein_coding	uncharacterized LOC100642173	-
409884	307.392	281.832	236.226	430.838	404.398	390.349	275.15	408.528	-0.57165	0.00182937	0.0309704	LOC409884	NC_037641.1	7864716	7873991	-	2333	protein_coding	xylulose kinase	FGGY_N
100576703	511.242	532.766	576.503	700.112	979.351	761.68	540.17	813.714	-0.590233	0.00186243	0.0312978	LOC100576703	NC_037643.1	9016424	9025292	-	3910	protein_coding	sarcalumenin%2C transcript variant X5	-
725725	365.635	269.66	241.85	511.164	513.811	403.36	292.382	476.112	-0.70501	0.0018947	0.0316651	LOC725725	NC_037638.1	26176929	26178009	-	645	protein_coding	peritrophin-1	CBM_14
410689	187.671	228.462	193.105	300.309	410.834	282.252	203.079	331.132	-0.70367	0.00193535	0.0322544	LOC410689	NC_037638.1	19394430	19436388	-	13185	protein_coding	ELAV-like protein 2%2C transcript variant X5	-
551188	756.077	662.914	682.43	900.926	1004.02	975.871	700.474	960.273	-0.455319	0.00193703	0.0322544	LOC551188	NC_037643.1	12928167	12952473	+	5227	protein_coding	ankyrin repeat and BTB/POZ domain-containing protein BTBD11%2C transcript variant X2	BTB
410363	138.057	141.384	146.235	277.489	215.607	195.174	141.892	229.424	-0.694253	0.00194431	0.0322578	LOC410363	NC_037649.1	6744576	6769869	-	16805	protein_coding	uncharacterized LOC410363%2C transcript variant X3	TBC
novel.38	95.9926	29.9622	41.2458	241.89	108.34	118.105	55.7335	156.112	-1.49241	0.00195749	0.0323832	-	NC_037638.1	24941928	24945423	+	2348	-	-	-
novel.92	75.4998	59.9245	67.4931	173.431	114.776	101.09	67.6391	129.766	-0.943854	0.00195896	0.0323832	-	NC_037639.1	15587247	15603596	-	1413	-	-	-
409851	724.798	617.035	699.303	1215.84	920.354	909.812	680.379	1015.34	-0.578264	0.00196728	0.0324618	LOC409851	NC_037644.1	7849025	7911946	+	2017	protein_coding	amphiphysin%2C transcript variant X1	-
408830	1532.65	1241.56	1461.41	1839.28	2331.99	1948.74	1411.87	2040	-0.530944	0.00199439	0.0326729	LOC408830	NC_037642.1	5857952	5893595	+	18936	protein_coding	obscurin%2C transcript variant X1	Pkinase
724679	63.6356	53.3702	52.4946	118.663	81.5232	113.101	56.5001	104.429	-0.890828	0.002005	0.0327878	LOC724679	NC_037638.1	1742785	1756276	+	1894	protein_coding	uncharacterized LOC724679	-
406151	602.92	635.761	554.006	774.961	935.371	817.73	597.562	842.687	-0.495493	0.00201746	0.0329213	mGlutR1	NC_037648.1	14015127	14045583	-	8111	protein_coding	metabotropic glutamate receptor 1%2C transcript variant X1	ANF_receptor
724220	29.1214	28.0896	36.5588	64.8083	66.5057	58.0518	31.2566	63.122	-1.01215	0.00202037	0.0329213	LOC724220	NC_037643.1	10200737	10256162	-	6237	protein_coding	synaptotagmin-10	C2
409472	496.142	807.108	619.624	1262.39	990.077	923.825	640.958	1058.76	-0.723728	0.00202839	0.0329929	LOC409472	NC_037647.1	5790920	5800464	-	7433	protein_coding	protein Smaug homolog 1	SAM_1
409137	42.0642	45.8797	29.0595	106.797	56.8517	93.0831	39.0011	85.5772	-1.1378	0.00204046	0.0330714	LOC409137	NC_037652.1	2636974	2669202	-	6847	protein_coding	MAP kinase-activating death domain protein%2C transcript variant X4	DENN
100577140	889.819	1030.89	822.103	1498.81	1294.72	1187.06	914.27	1326.86	-0.537451	0.0020704	0.0333898	LOC100577140	NC_037638.1	11352891	11356524	+	2115	protein_coding	UDP-glucuronosyltransferase 2B19%2C transcript variant X1	UDPGT
100577656	711.855	626.398	672.119	1083.48	806.65	1081.97	670.124	990.7	-0.564716	0.00207108	0.0333898	LOC100577656	NC_037652.1	7281123	7319756	-	9537	protein_coding	uncharacterized LOC100577656%2C transcript variant X2	-
102653894	115.407	98.3136	101.24	145.134	294.985	174.156	104.987	204.758	-0.962624	0.00208933	0.0335654	LOC102653894	NC_037652.1	6428354	6430526	+	1640	protein_coding	uncharacterized LOC102653894	-
408967	4202.1	4447.52	3862.1	6183.26	5384.82	5364.79	4170.58	5644.29	-0.436622	0.00211338	0.0338921	LOC408967	NC_037645.1	7586766	7608065	-	8403	protein_coding	calcium-binding mitochondrial carrier protein Aralar1%2C transcript variant X1	Mito_carr
102654246	37.7499	13.1085	37.4962	136.919	91.1772	43.0384	29.4515	90.3782	-1.62199	0.00212164	0.0339053	LOC102654246	NC_037646.1	10131920	10133151	+	891	protein_coding	MAGE-like protein 2	-
726829	285.821	231.271	232.476	404.367	382.944	336.3	249.856	374.537	-0.585739	0.00214938	0.0342287	LOC726829	NC_037645.1	8999564	9058681	-	4157	protein_coding	uncharacterized LOC726829%2C transcript variant X2	-
409856	732.348	838.006	683.367	1248.7	968.624	1060.95	751.241	1092.76	-0.540932	0.0022068	0.0348996	LOC409856	NC_037640.1	10728999	10819043	-	8225	protein_coding	guanine nucleotide-releasing factor 2%2C transcript variant X10	-
102655476	705.384	589.882	321.53	1277.91	772.325	1083.97	538.932	1044.73	-0.955762	0.00222894	0.0351279	LOC102655476	NC_037646.1	10079924	10081923	+	1839	protein_coding	hornerin	-
408381	44.2213	29.0259	40.3084	71.1978	66.5057	90.0804	37.8519	75.928	-1.0081	0.00224076	0.0352533	LOC408381	NC_037649.1	8305441	8316952	+	6443	protein_coding	sodium- and chloride-dependent GABA transporter 1%2C transcript variant X1	SNF
412885	3120.3	3158.21	2995.94	3772.57	4144.81	4165.72	3091.48	4027.7	-0.381593	0.00225147	0.0353609	LOC412885	NC_037646.1	12296583	12314230	-	3060	protein_coding	protein N-terminal asparagine amidohydrolase%2C transcript variant X3	-
102653800	195.221	151.684	169.67	241.89	298.203	260.232	172.192	266.775	-0.632257	0.00225934	0.0353643	LOC102653800	NC_037638.1	23454512	23462297	-	4268	protein_coding	glutamate receptor ionotropic%2C kainate 2%2C transcript variant X1	Lig_chan
102653655	181.2	442.879	279.346	1020.5	415.125	619.553	301.142	685.06	-1.18543	0.00225944	0.0353643	LOC102653655	NC_037651.1	4650536	4672926	-	8652	protein_coding	mucin-19%2C transcript variant X2	-
408561	353.771	376.401	325.279	478.303	692.947	485.433	351.817	552.228	-0.649655	0.00228912	0.0357675	LOC408561	NC_037653.1	5874617	5890453	-	2511	protein_coding	proteoglycan 4%2C transcript variant X1	-
727370	712.934	805.235	739.612	1474.16	1058.73	965.862	752.594	1166.25	-0.632182	0.00229504	0.0357987	LOC727370	NC_037644.1	4742572	4765310	-	5033	protein_coding	uncharacterized LOC727370%2C transcript variant X3	RhoGAP
409950	1046.21	949.428	838.976	1392.92	1507.11	1187.06	944.872	1362.36	-0.52818	0.00230418	0.0358799	LOC409950	NC_037639.1	639479	663432	+	5139	protein_coding	fibrillin-1	EGF_CA
411968	72.2641	43.0707	51.5572	88.5409	150.174	102.091	55.6307	113.602	-1.03192	0.00231003	0.0359098	LOC411968	NC_037638.1	3181511	3186227	+	2377	protein_coding	kelch-like protein 10	BACK
552577	204.928	172.283	167.795	239.152	311.075	296.265	181.669	282.164	-0.635528	0.00241704	0.0372895	LOC552577	NC_037648.1	12614268	12649707	+	8825	protein_coding	junctophilin-1%2C transcript variant X1	-
100578813	197.378	132.957	130.299	220.896	375.436	251.224	153.545	282.519	-0.880485	0.00244377	0.0375411	LOC100578813	NC_037651.1	8677518	8704082	+	1978	protein_coding	uncharacterized LOC100578813	-
724942	391.52	351.12	377.774	548.588	524.537	486.434	373.471	519.853	-0.477813	0.00245332	0.0375901	LOC724942	NC_037648.1	6644649	6747254	+	2569	protein_coding	putative phosphatidate phosphatase%2C transcript variant X1	-
408920	951.298	788.381	899.908	1214.93	1145.62	1255.12	879.862	1205.22	-0.454439	0.0024552	0.0375901	LOC408920	NC_037641.1	10644330	10652463	+	2803	protein_coding	long-chain fatty acid transport protein 4	AMP-binding
113218867	1630.8	2063.65	1821.38	2787.67	2991.69	2262.02	1838.61	2680.46	-0.543649	0.00246487	0.0376749	LOC113218867	NC_037643.1	4892079	4894349	-	1566	protein_coding	paramyosin%2C short form-like	Myosin_tail_1
410233	862.855	739.693	663.682	1088.05	1185.3	987.882	755.41	1087.08	-0.525575	0.0024785	0.0378199	LOC410233	NC_037647.1	6966442	7036792	-	7442	protein_coding	extracellular sulfatase SULF-1 homolog%2C transcript variant X1	-
410729	3115.98	2570.2	2418.5	3738.8	4458.03	3529.15	2701.56	3908.66	-0.532976	0.00248404	0.0378412	LOC410729	NC_037638.1	10476644	10478968	+	1650	protein_coding	putative serine protease K12H4.7	Peptidase_S28
726099	220.028	198.5	224.04	273.838	358.273	340.304	214.189	324.138	-0.59687	0.00249078	0.0378805	LOC726099	NC_037640.1	9378937	9380724	+	1297	protein_coding	UPF0454 protein C12orf49 homolog%2C transcript variant X1	-
408618	1300.75	1227.52	906.47	1901.35	1479.22	1891.69	1144.91	1757.42	-0.618652	0.00252513	0.0381848	LOC408618	NC_037638.1	3993015	4375035	-	5541	protein_coding	furin-like protease 2%2C transcript variant X2	Peptidase_S8
410197	231.892	174.155	159.359	461.873	316.439	250.223	188.469	342.845	-0.86548	0.00252752	0.0381848	Cry2	NC_037647.1	9884663	9893215	+	3624	protein_coding	cryptochrome 2%2C transcript variant X1	-
410006	93.8355	66.4787	103.114	125.965	179.136	167.149	87.8095	157.417	-0.841496	0.0025915	0.0390866	LOC410006	NC_037647.1	3837615	3979930	-	5895	protein_coding	uncharacterized LOC410006%2C transcript variant X2	-
411053	1024.64	419.471	734.925	1048.8	1448.11	1887.69	726.345	1461.53	-1.00913	0.00264899	0.0397433	LOC411053	NC_037641.1	4195178	4212096	+	11457	protein_coding	cubilin	CUB
408937	6418.56	7503.67	7158.95	8586.64	10075.6	9865.81	7027.06	9509.36	-0.436328	0.00265172	0.0397433	LOC408937	NC_037644.1	8400623	8407006	-	1667	protein_coding	SPARC%2C transcript variant X2	-
724126	225.421	121.722	154.672	347.774	345.401	231.206	167.271	308.127	-0.883631	0.00265246	0.0397433	LOC724126	NC_037653.1	1891294	1895276	-	1062	protein_coding	uncharacterized LOC724126	-
412458	3068.53	2370.76	2424.13	5181.92	4583.53	3045.72	2621.14	4270.39	-0.704325	0.00267293	0.0399785	LOC412458	NC_037638.1	6481220	6485582	+	983	protein_coding	farnesol dehydrogenase	adh_short
novel.30	56.0856	53.3702	44.058	89.4537	81.5232	106.095	51.1713	92.3572	-0.854405	0.00274907	0.0407923	-	NC_037638.1	17694658	17697859	+	3143	-	-	-
102655950	737.741	648.87	606.5	854.374	1042.64	924.826	664.37	940.613	-0.501759	0.00274929	0.0407923	LOC102655950	NC_037640.1	1488551	1491637	-	3087	protein_coding	peroxisome biogenesis factor 2	-
409847	133.743	168.538	130.299	273.838	232.77	196.175	144.193	234.261	-0.700101	0.0027545	0.0408033	LOC409847	NC_037647.1	3235530	3245397	-	2642	protein_coding	15-hydroxyprostaglandin dehydrogenase [NAD(+)]%2C transcript variant X2	adh_short
726681	1308.3	1197.55	1134.26	1493.33	1737.73	1732.55	1213.37	1654.54	-0.447453	0.00278547	0.0411952	LOC726681	NC_037641.1	12263248	12274063	-	4554	protein_coding	formin-2	FH2
100578168	243.757	214.417	177.169	436.315	283.186	329.294	211.781	349.598	-0.72541	0.00280061	0.0413133	LOC100578168	NC_037641.1	8898399	8913756	+	3100	protein_coding	glycoprotein 3-alpha-L-fucosyltransferase A%2C transcript variant X10	-
100576826	884.426	663.851	662.745	1089.87	1044.78	1056.94	737.007	1063.87	-0.530442	0.00282304	0.0415487	LOC100576826	NC_037642.1	9463142	9468625	+	1799	protein_coding	LHFPL tetraspan subfamily member 5 protein%2C transcript variant X2	-
409729	8713.76	8675	8184.47	11225.5	18901.6	11308.1	8524.41	13811.7	-0.696189	0.00283373	0.041639	LOC409729	NC_037642.1	13691706	13723164	-	12807	protein_coding	zinc finger protein 608%2C transcript variant X6	-
413994	143.45	96.4409	131.237	257.408	184.5	191.171	123.709	211.026	-0.773599	0.00289851	0.0421833	LOC413994	NC_037646.1	2590081	2710106	-	8664	protein_coding	calcium-activated potassium channel slowpoke%2C transcript variant X7	Ion_trans
410127	1254.38	1291.19	1244.87	1932.38	1510.32	1770.58	1263.48	1737.76	-0.460117	0.00300567	0.0435345	LOC410127	NC_037639.1	6292742	6329045	+	6860	protein_coding	rho guanine nucleotide exchange factor 11%2C transcript variant X1	RhoGEF
409701	7.54998	6.55424	10.3114	17.3431	49.343	22.0197	8.13855	29.5686	-1.85366	0.00304317	0.0439142	LOC409701	NC_037638.1	9733443	9817264	-	2380	protein_coding	zwei Ig domain protein zig-8%2C transcript variant X1	I-set
408429	7772.17	7646.92	7042.72	8915.25	10746	10498.4	7487.27	10053.2	-0.425121	0.00304632	0.0439142	LOC408429	NC_037650.1	6004509	6151702	-	11057	protein_coding	tensin-1%2C transcript variant X3	-
409192	3396.41	2637.61	3155.3	4303.82	4008.58	4301.84	3063.11	4204.75	-0.457199	0.00312109	0.0447388	LOC409192	NC_037639.1	15049440	15067954	-	5510	protein_coding	probable phospholipid-transporting ATPase VD%2C transcript variant X1	E1-E2_ATPase
100576157	1503.52	1324.89	1024.58	2030.05	1854.65	1785.59	1284.33	1890.1	-0.557868	0.00317618	0.0452854	LOC100576157	NC_037648.1	851679	864865	+	2507	protein_coding	uncharacterized LOC100576157	-
408643	3037.25	1741.55	1758.57	4647.03	2675.25	4726.22	2179.12	4016.16	-0.882331	0.00318904	0.0453638	LOC408643	NC_037638.1	24095499	24108221	-	2155	protein_coding	uncharacterized LOC408643%2C transcript variant X2	-
724304	517.713	220.971	275.597	808.734	668.275	517.462	338.094	664.824	-0.977064	0.00319162	0.0453638	LOC724304	NC_037641.1	12558118	12564787	-	2473	protein_coding	ATP-binding cassette sub-family G member 1%2C transcript variant X5	ABC2_membrane
552844	32.3571	42.1344	44.9954	79.413	107.267	59.0527	39.8289	81.911	-1.03518	0.00323601	0.0459231	LOC552844	NC_037652.1	6603005	6841964	-	3746	protein_coding	complexin%2C transcript variant X1	-
724285	476.727	481.268	436.83	624.35	642.531	612.547	464.942	626.476	-0.430333	0.00328483	0.0465436	LOC724285	NC_037647.1	2574336	2706018	-	3311	protein_coding	choline transporter-like protein 1%2C transcript variant X2	-
409598	3307.97	1840.8	2689.41	8863.22	3105.39	4574.08	2612.73	5514.23	-1.07775	0.00332258	0.0470055	LOC409598	NC_037641.1	2264077	2405657	+	19086	protein_coding	uncharacterized LOC409598	EGF_CA
551280	688.127	722.839	552.131	839.769	1425.58	956.854	654.366	1074.07	-0.714591	0.00339736	0.0477153	LOC551280	NC_037638.1	18415550	18424034	+	3382	protein_coding	uncharacterized LOC551280%2C transcript variant X1	-
408447	317.099	278.087	287.783	384.286	482.703	409.366	294.323	425.451	-0.531445	0.0034	0.0477153	LOC408447	NC_037651.1	5098269	5104151	-	2481	protein_coding	neurotactin	COesterase
100576471	133.743	110.486	131.237	171.605	220.971	196.175	125.155	196.25	-0.648542	0.00340413	0.0477153	LOC100576471	NC_037645.1	4286663	4369491	+	5028	protein_coding	uncharacterized LOC100576471	-
409108	153.157	172.283	146.235	253.756	226.334	222.198	157.225	234.096	-0.574631	0.00344987	0.047988	LOC409108	NC_037649.1	6085974	6221968	+	10840	protein_coding	uncharacterized LOC409108%2C transcript variant X1	RhoGEF
100578300	624.491	421.344	596.189	911.88	714.4	926.828	547.341	851.036	-0.637586	0.00346213	0.0480761	LOC100578300	NC_037638.1	10983352	10997649	+	3405	protein_coding	uncharacterized LOC100578300%2C transcript variant X1	-
100578745	263.171	252.806	270.91	384.286	379.726	340.304	262.296	368.105	-0.489081	0.00346674	0.0480761	LOC100578745	NC_037648.1	15051248	15054332	+	1802	protein_coding	uncharacterized LOC100578745%2C transcript variant X3	-
412788	323.571	565.537	331.841	1109.96	523.465	734.656	406.983	789.359	-0.955745	0.00356138	0.0490901	LOC412788	NC_037649.1	9277013	9302506	-	4257	protein_coding	scavenger receptor class B member 1%2C transcript variant X3	-
411619	3347.88	3479.36	3144.05	4178.76	4430.14	4199.75	3323.76	4269.55	-0.361233	0.00359354	0.0494586	LOC411619	NC_037641.1	5927126	5932377	-	4018	protein_coding	double-strand-break repair protein rad21 homolog%2C transcript variant X2	Rad21_Rec8_N
724243	2530.32	1647.92	1902.93	3347.21	2782.51	3032.71	2027.06	3054.14	-0.591739	0.00361589	0.0496614	LOC724243	NC_037649.1	9315781	9622683	-	9362	protein_coding	fasciclin-3%2C transcript variant X2	-
552301	7383.88	6499	6944.29	8208.74	13870.7	10189.1	6942.39	10756.2	-0.631627	0.00361916	0.0496614	LOC552301	NC_037643.1	546160	548872	+	862	protein_coding	chymotrypsin-1	Trypsin

## Sheet: 4Qvs4W_up
gene_id	4Q1	4Q2	4Q3	4w1	4w2	4w3	4Q	4w	log2FoldChange	pvalue	padj	gene_name	gene_chr	gene_start	gene_end	gene_strand	gene_length	gene_biotype	gene_description	tf_family
551869	7504.09	7602.7	6368.67	51.6891	34.1497	41.8591	7158.49	42.566	7.39692	2.85632e-221	2.76177e-217	LOC551869	NC_037649.1	7005427	7011763	-	4519	protein_coding	vitamin K-dependent gamma-carboxylase	VKG_Carbox
551179	33778.1	40108.3	54065.8	2106.33	2264.96	2091.96	42650.7	2154.42	4.3072	1.14516e-83	5.53626e-80	LOC551179	NC_037644.1	13421090	13423725	-	1515	protein_coding	methyl farnesoate epoxidase	p450
725026	4261.8	3052.84	2258.25	97.4141	97.8343	100.661	3190.96	98.6365	5.01552	2.44289e-73	7.87345e-70	LOC725026	NC_037646.1	7565208	7569909	-	1661	protein_coding	retinol dehydrogenase 10-A%2C transcript variant X3	adh_short
100577537	5546.16	5770.35	4959.28	415.501	213.205	249.161	5425.26	292.622	4.21309	2.32211e-52	5.61312e-49	LOC100577537	NC_037648.1	194850	203179	-	3744	protein_coding	uncharacterized LOC100577537%2C transcript variant X1	-
novel.314	603.935	372.351	576.72	32.8027	22.1512	20.9295	517.669	25.2945	4.35713	7.42147e-41	1.43516e-37	-	NC_037646.1	11120667	11126928	-	3361	-	-	-
100577440	616.493	480.136	377.086	27.8326	35.0727	19.9329	491.239	27.6127	4.14806	7.72039e-38	1.24414e-34	LOC100577440	NC_037646.1	7563266	7565146	+	1558	protein_coding	uncharacterized LOC100577440%2C transcript variant X1	OTU
102655073	328.796	272.186	282.388	20.8744	23.0741	30.896	294.457	24.9482	3.56194	1.86521e-35	2.57638e-32	LOC102655073	NC_037638.1	15195053	15195486	-	434	protein_coding	histone H4	-
102653922	1999.04	2454.03	1647.41	201.786	138.445	245.175	2033.49	195.135	3.38214	7.75563e-35	9.37365e-32	LOC102653922	NC_037649.1	6999089	7004422	-	2758	protein_coding	organic cation transporter protein	Sugar_tr
725089	494.336	930.877	574.161	17.8924	13.8445	38.8692	666.458	23.5353	4.82798	8.65118e-32	6.43448e-29	LOC725089	NC_037639.1	9048785	9050117	+	773	protein_coding	cuticular protein	-
408930	551.419	1172.58	551.126	4.97011	1.84593	18.9363	758.374	8.5841	6.47635	2.16343e-29	1.49416e-26	TyHyd	NC_037644.1	9098081	9111467	+	3177	protein_coding	tyrosine hydroxylase%2C transcript variant X1	-
726886	1205.59	942.853	735.404	158.049	133.83	133.55	961.281	141.81	2.76046	6.84868e-28	3.89529e-25	LOC726886	NC_037638.1	1056771	1147819	-	2528	protein_coding	uncharacterized LOC726886	-
552101	2002.46	2000.02	1962.21	500.987	346.112	346.833	1988.23	397.977	2.32102	1.36497e-27	7.33216e-25	LOC552101	NC_037639.1	12563656	12595060	+	3658	protein_coding	uncharacterized LOC552101%2C transcript variant X1	PDZ
102654975	485.203	440.942	708.957	4.97011	5.53779	25.9128	545.034	12.1402	5.49643	1.65923e-27	8.44374e-25	LOC102654975	NC_037641.1	8378760	8475988	+	26435	protein_coding	zinc finger protein 628-like%2C transcript variant X3	-
409633	541.144	248.234	253.382	12.9223	3.69186	8.96981	347.587	8.52798	5.35793	4.65501e-27	2.1433e-24	LOC409633	NC_037645.1	4202401	4206565	+	1312	protein_coding	ras-related and estrogen-regulated growth inhibitor	Ras
552766	307.105	400.658	368.555	48.707	63.6846	64.7819	358.773	59.0579	2.60252	3.25679e-25	1.2596e-22	LOC552766	NC_037652.1	7403869	7406083	-	1592	protein_coding	tubulin alpha chain	Tubulin
726040	103414	96669.6	69555.4	7689.75	15010.2	9118.31	89879.8	10606.1	3.08308	5.23547e-25	1.87488e-22	LOC726040	NC_037650.1	5750297	5759779	+	2983	protein_coding	4-coumarate--CoA ligase 1%2C transcript variant X2	AMP-binding
726019	1924.83	2443.14	2207.06	551.682	600.851	463.44	2191.68	538.657	2.02439	6.87173e-25	2.37295e-22	LOC726019	NC_037648.1	16138955	16149205	-	6664	protein_coding	protein PTHB1-like	-
100216325	4863.45	3673.42	4076.29	1208.73	1214.62	1153.12	4204.39	1192.16	1.81822	3.71629e-24	1.23906e-21	Emc	NC_037638.1	821805	824037	-	2233	protein_coding	extra macrochaetae	HLH
725258	4766.41	6332.14	5322.72	1616.28	1486.9	1406.27	5473.76	1503.15	1.86455	5.81797e-24	1.81464e-21	LOC725258	NC_037643.1	15373592	15379377	+	2015	protein_coding	very-long-chain 3-oxoacyl-CoA reductase%2C transcript variant X2	adh_short
725414	1222.71	1289.07	1232.78	269.38	244.586	357.796	1248.19	290.587	2.10337	1.30695e-23	3.94902e-21	LOC725414	NC_037638.1	15887275	15889622	-	699	protein_coding	histone H3	Histone
412843	35446.1	61822.2	36014.3	2312.09	635	2600.25	44427.5	1849.11	4.58662	1.89013e-23	5.53809e-21	LOC412843	NC_037640.1	4849307	4859607	+	4095	protein_coding	phosphoenolpyruvate carboxykinase%2C transcript variant X2	-
408500	4237.82	4556.4	4056.67	439.357	560.24	886.018	4283.63	628.538	2.76885	2.63436e-23	7.49166e-21	LOC408500	NC_037651.1	10489342	10501816	+	5435	protein_coding	endothelin-converting enzyme homolog%2C transcript variant X3	-
100578514	391.587	555.26	277.269	17.8924	20.3052	40.8625	408.039	26.3534	3.95423	3.42351e-23	9.4577e-21	LOC100578514	NC_037639.1	9041792	9043573	-	1429	protein_coding	keratinocyte proline-rich protein	-
410821	1903.14	1491.58	1637.17	394.626	475.327	492.343	1677.3	454.099	1.88481	5.43887e-22	1.46079e-19	LOC410821	NC_037639.1	13988911	14000100	+	3514	protein_coding	tetraspanin-9%2C transcript variant X1	Tetraspannin
724150	857.383	635.827	720.047	189.858	142.137	168.433	737.752	166.809	2.14546	1.31433e-21	3.43465e-19	LOC724150	NC_037647.1	3654801	3698299	-	8986	protein_coding	B-cell lymphoma/leukemia 11B%2C transcript variant X2	-
100576671	2129.19	2173.13	2014.26	697.803	732.835	806.286	2105.53	745.641	1.49754	1.71249e-21	4.24566e-19	LOC100576671	NC_037650.1	3509776	3519756	-	7072	protein_coding	polycomb group protein Psc%2C transcript variant X4	-
725238	1948.8	1424.08	1534.79	386.674	404.259	285.041	1635.89	358.658	2.18888	2.72601e-21	6.58944e-19	LOC725238	NC_037638.1	15883260	15884110	+	851	protein_coding	histone H1	-
413676	1331.17	1152.98	1316.39	299.2	288.888	397.661	1266.85	328.583	1.94741	5.80327e-21	1.33599e-18	LOC413676	NC_037645.1	7356062	7383896	+	4971	protein_coding	patched domain-containing protein 3%2C transcript variant X1	-
410566	3431.81	2867.75	2281.29	555.658	416.257	666.756	2860.28	546.224	2.38871	1.16417e-20	2.61776e-18	LOC410566	NC_037651.1	10645362	10651889	-	4003	protein_coding	putative inorganic phosphate cotransporter%2C transcript variant X1	MFS_1
410368	2905.51	4064.28	5948.07	619.275	751.294	698.648	4305.95	689.739	2.64234	1.49025e-20	3.27483e-18	LOC410368	NC_037649.1	7044915	7062744	+	6661	protein_coding	cadherin-23	Cadherin
100577168	1043.47	1036.48	857.402	192.84	260.276	153.483	979.12	202.2	2.27427	1.16617e-19	2.45124e-17	LOC100577168	NC_037643.1	15385274	15395615	-	2767	protein_coding	uncharacterized LOC100577168%2C transcript variant X2	-
novel.286	1097.13	1291.25	534.917	23.8565	15.6904	73.7517	974.433	37.7662	4.69179	2.37545e-19	4.87529e-17	-	NC_037645.1	4196040	4201614	-	5311	-	-	-
725272	2303.86	2299.43	2039	190.852	136.599	385.702	2214.09	237.718	3.22003	2.42025e-19	4.87529e-17	LOC725272	NC_037638.1	15877160	15877794	+	635	protein_coding	histone H3	Histone
724275	118.732	187.264	146.74	13.9163	11.0756	3.98658	150.912	9.65949	3.96257	2.82762e-19	5.57964e-17	LOC724275	NC_037639.1	3887868	3909867	+	1908	protein_coding	uncharacterized LOC724275%2C transcript variant X5	-
725274	144616	146659	99235.2	12915.3	17913.8	27519.4	130170	19449.5	2.74259	1.06134e-18	1.97349e-16	LOC725274	NC_037648.1	2630214	2633121	+	1309	protein_coding	3-hydroxyacyl-CoA dehydrogenase type-2	adh_short
410449	1056.03	1072.41	773.795	125.247	164.288	235.208	967.413	174.914	2.46726	6.13837e-18	1.05986e-15	LOC410449	NC_037650.1	5747378	5751584	-	2179	protein_coding	uncharacterized LOC410449%2C transcript variant X2	-
408395	2497.94	3679.96	3388.66	178.924	496.555	426.564	3188.85	367.348	3.11753	9.6331e-18	1.63408e-15	LOC408395	NC_037649.1	10848932	10855820	-	2427	protein_coding	venom carboxylesterase-6-like%2C transcript variant X1	COesterase
726250	2581.28	1181.29	2778.67	208.744	170.749	330.886	2180.41	236.793	3.20344	1.03225e-17	1.72083e-15	LOC726250	NC_037652.1	7727328	7733724	+	4699	protein_coding	cilia- and flagella-associated protein 43-like%2C transcript variant X1	-
107964284	90.1907	163.312	85.3137	2.98206	2.7689	2.98994	112.939	2.91363	5.2762	2.07492e-17	3.34373e-15	LOC107964284	NC_037641.1	4951908	4965636	-	8687	protein_coding	midasin%2C transcript variant X2	-
410448	1572.06	1617.87	1220.84	332.997	431.948	452.477	1470.26	405.807	1.85664	2.75513e-17	4.29667e-15	LOC410448	NC_037650.1	5742806	5747370	+	2937	protein_coding	carcinine transporter%2C transcript variant X2	Sugar_tr
410802	3119	2816.58	2448.5	1039.75	1007.88	1056.44	2794.7	1034.69	1.43324	5.68576e-17	8.58993e-15	LOC410802	NC_037639.1	16006233	16020568	+	3885	protein_coding	microphthalmia-associated transcription factor%2C transcript variant X2	-
725230	2950.04	2852.51	2536.38	655.06	441.178	808.279	2779.64	634.839	2.1307	7.00877e-17	1.04258e-14	LOC725230	NC_037638.1	15876519	15877060	-	542	protein_coding	histone H4	-
727121	2339.25	2163.34	2066.3	937.362	880.509	844.158	2189.63	887.343	1.30292	7.33757e-17	1.07495e-14	LOC727121	NC_037651.1	9815743	9827516	-	2876	protein_coding	uncharacterized LOC727121%2C transcript variant X2	-
408275	1443.05	1597.19	1339.42	466.196	532.551	567.091	1459.89	521.946	1.48356	1.5509e-16	2.23816e-14	LOC408275	NC_037647.1	11315158	11360665	+	4668	protein_coding	uncharacterized LOC408275%2C transcript variant X2	-
410052	1185.04	720.749	317.367	72.5636	53.532	65.7786	741.051	63.958	3.53415	3.82205e-16	5.35585e-14	Syt20	NC_037653.1	1767494	1778077	-	3000	protein_coding	synaptotagmin 20	C2
410638	5454.83	3733.31	5536	1401.57	1090.02	1450.12	4908.05	1313.9	1.90146	4.82493e-16	6.6646e-14	LOC410638	NC_037653.1	6754819	6762855	-	3866	protein_coding	aromatic-L-amino-acid decarboxylase	-
408270	10111.6	9862.94	14026.4	1201.77	2025.91	2669.02	11333.7	1965.57	2.52763	7.2015e-16	9.67102e-14	CytC	NC_037647.1	11824493	11827235	-	1080	protein_coding	mitochondrial cytochrome C	-
410288	3003.69	2388.71	2685.67	564.604	354.419	731.538	2692.69	550.187	2.29142	9.29111e-16	1.23063e-13	LOC410288	NC_037648.1	209877	214581	+	1162	protein_coding	phytanoyl-CoA dioxygenase	PhyH
100577156	115.307	142.626	189.396	13.9163	16.6134	24.9161	149.11	18.4819	3.01694	1.31736e-15	1.69834e-13	LOC100577156	NC_037644.1	10507285	10509859	-	1340	protein_coding	chitinase-3-like protein 1	-
409712	4997.02	4905.88	3016.69	400.591	477.173	932.86	4306.53	603.541	2.83505	1.62611e-15	2.06879e-13	LOC409712	NC_037652.1	7870499	7874116	+	1537	protein_coding	short/branched chain specific acyl-CoA dehydrogenase%2C mitochondrial	-
409183	2706.86	2712.06	2384.52	912.512	899.891	1118.24	2601.15	976.88	1.41284	2.87946e-15	3.61578e-13	LOC409183	NC_037643.1	5254850	5257635	-	2178	protein_coding	sialin%2C transcript variant X1	MFS_1
725980	585.669	766.476	732.844	148.109	199.361	220.259	694.997	189.243	1.87694	3.22856e-15	4.00217e-13	LOC725980	NC_037638.1	20111422	20112500	-	642	protein_coding	28S ribosomal protein S36%2C mitochondrial	-
551465	14865.5	11670.3	7708.94	1037.76	395.029	1592.64	11414.9	1008.48	3.50079	4.06477e-15	4.97497e-13	LOC551465	NC_037640.1	1069115	1076099	+	1846	protein_coding	homogentisate 1%2C2-dioxygenase	-
412591	1218.15	870.996	964.045	360.83	327.653	352.812	1017.73	347.098	1.55175	4.87567e-14	5.41871e-12	LOC412591	NC_037648.1	10422253	10522338	-	2696	protein_coding	calcitonin gene-related peptide type 1 receptor%2C transcript variant X1	7tm_2
551570	2714.85	2785.01	2459.59	1142.13	1233.08	1215.91	2653.15	1197.04	1.14798	5.25254e-14	5.77123e-12	LOC551570	NC_037644.1	843639	846341	+	1761	protein_coding	leucine-rich melanocyte differentiation-associated protein%2C transcript variant X2	-
100576395	1053.75	652.158	685.922	178.924	214.128	127.571	797.276	173.541	2.19856	8.4893e-14	9.02012e-12	Kr-h1	NC_037643.1	16501760	16510451	-	3476	protein_coding	kruppel homolog 1%2C transcript variant X2	zf-C2H2
411296	1086.86	1597.19	1751.49	348.901	294.426	456.463	1478.51	366.597	2.0126	8.84424e-14	9.24224e-12	LOC411296	NC_037646.1	11735560	11737443	-	1884	protein_coding	silk gland factor 1	Fork_head
100576912	1088	967.894	1187.57	379.716	378.416	262.118	1081.15	340.083	1.66857	1.00364e-13	1.03236e-11	LOC100576912	NC_037645.1	4064269	4100647	+	2922	protein_coding	cyclic AMP response element-binding protein A	-
408827	9653.83	10635.9	7161.23	2223.63	2113.59	3197.24	9150.34	2511.48	1.86527	1.18813e-13	1.20927e-11	LOC408827	NC_037642.1	5732997	5756456	+	3510	protein_coding	carbonic anhydrase 1	-
726542	595.944	512.799	542.595	76.5396	89.5277	164.446	550.446	110.171	2.32161	1.32664e-13	1.32948e-11	LOC726542	NC_037638.1	15195630	15196174	+	545	protein_coding	histone H3	Histone
551895	1899.71	1745.26	1400	628.222	646.999	633.866	1681.66	636.362	1.4014	1.33374e-13	1.32948e-11	LOC551895	NC_037650.1	2918638	2969534	-	6108	protein_coding	serine/threonine-protein kinase 17A%2C transcript variant X3	-
novel.22	3023.1	2699	2413.52	1117.28	915.582	1111.26	2711.87	1048.04	1.37153	1.62575e-13	1.58782e-11	-	NC_037638.1	9301193	9306459	+	4694	-	PF00452:Apoptosis regulator proteins, Bcl-2 family	-
100577028	2268.47	1151.89	1817.18	162.025	309.193	368.759	1745.85	279.993	2.64033	1.80353e-13	1.72657e-11	LOC100577028	NC_037645.1	4175629	4185151	-	2902	protein_coding	insulin-like growth factor I%2C transcript variant X2	-
725246	629.052	517.154	651.797	153.079	215.051	200.326	599.334	189.485	1.66106	2.18997e-13	2.07596e-11	LOC725246	NC_037649.1	964272	982970	-	8032	protein_coding	uncharacterized LOC725246%2C transcript variant X2	-
100577026	5422.86	6116.57	6190.36	1451.27	2183.74	2164.71	5909.93	1933.24	1.61209	2.34609e-13	2.20236e-11	LOC100577026	NC_037644.1	2090260	2095979	-	1908	protein_coding	mitochondrial amidoxime-reducing component 1%2C transcript variant X3	MOSC
408857	220.339	235.169	131.383	27.8326	40.6105	33.8859	195.63	34.1097	2.51511	3.39042e-13	3.12209e-11	LOC408857	NC_037642.1	11829964	11933511	+	3918	protein_coding	hemicentin-1%2C transcript variant X6	-
408292	815.141	890.593	896.647	368.782	358.111	404.638	867.46	377.177	1.2021	9.60952e-13	8.60319e-11	LOC408292	NC_037647.1	9371195	9382351	-	2180	protein_coding	transcriptional coactivator YAP1%2C transcript variant X1	WW
100577719	252.306	202.507	285.801	50.6951	55.3779	76.7417	246.871	60.9382	2.02058	1.15609e-12	1.02553e-10	LOC100577719	NC_037639.1	12595987	12598959	+	2666	protein_coding	uncharacterized LOC100577719	-
552079	793.45	890.593	898.353	343.931	259.353	347.829	860.799	317.038	1.44196	1.21859e-12	1.07114e-10	LOC552079	NC_037642.1	7613463	8093347	+	5300	protein_coding	homeobox protein homothorax%2C transcript variant X5	-
409726	555.986	500.823	546.008	204.768	222.435	230.225	534.272	219.143	1.28575	1.25022e-12	1.08904e-10	LOC409726	NC_037642.1	13757504	13760286	-	2568	protein_coding	adenosine monophosphate-protein transferase Fic	Fic
409924	15735.4	19483.1	9166.95	3830.96	2170.81	2918.18	14795.2	2973.32	2.31498	1.32488e-12	1.14377e-10	LOC409924	NC_037638.1	9274925	9296077	-	3017	protein_coding	synaptic vesicle glycoprotein 2B%2C transcript variant X2	MFS_1
724378	10104.8	10424.7	6754.28	3260.39	2707.98	2365.04	9094.6	2777.8	1.71099	1.57477e-12	1.34748e-10	LOC724378	NC_037650.1	4528727	4550333	+	1793	protein_coding	BMP and activin membrane-bound inhibitor homolog	-
411260	1637.13	1605.9	1814.62	728.618	598.082	761.437	1685.88	696.045	1.27678	2.01386e-12	1.66427e-10	LOC411260	NC_037645.1	5869577	5873195	-	1712	protein_coding	ras-related protein Rab-27A	Ras
413186	1986.48	2442.05	2046.68	876.727	946.04	971.729	2158.4	931.498	1.21223	2.14096e-12	1.75432e-10	LOC413186	NC_037639.1	10522063	10524943	-	1465	protein_coding	mitochondrial pyruvate carrier 3	-
113219340	1780.98	1124.67	886.409	326.039	322.115	293.014	1264.02	313.723	2.00981	2.90905e-12	2.34397e-10	LOC113219340	NW_020555812.1	1432	5454	+	4023	rRNA	large subunit ribosomal RNA	-
443552	79462.6	51030.6	26360.2	9252.35	5255.37	9132.26	52284.4	7879.99	2.73012	3.61071e-12	2.88529e-10	Cat	NC_037643.1	8659532	8670508	+	1883	protein_coding	catalase%2C transcript variant X1	Catalase
726335	1237.55	1254.23	1218.28	395.621	387.646	558.121	1236.69	447.129	1.468	4.53464e-12	3.59388e-10	LOC726335	NC_037641.1	12073471	12088247	+	3962	protein_coding	protein CBFA2T2%2C transcript variant X2	-
408423	1377.98	1000.56	1461.42	419.477	334.114	470.417	1279.99	408.002	1.65012	5.21445e-12	4.09907e-10	Foxp	NC_037650.1	5292251	5526825	-	13290	protein_coding	FoxP protein%2C transcript variant X20	-
409451	20797.5	26878.9	18036.2	7895.51	7408.64	8787.42	21904.2	8030.53	1.44763	6.62143e-12	5.16311e-10	LOC409451	NC_037643.1	6611748	6613808	+	881	protein_coding	thioredoxin-2	-
409954	52107.4	61399.8	50694.2	17372.5	20871.9	24677.9	54733.8	20974.1	1.38382	7.76046e-12	6.00287e-10	LOC409954	NC_037649.1	988272	991191	-	853	protein_coding	peroxiredoxin 1	-
725344	1633.71	1133.38	875.318	173.954	91.3736	279.061	1214.14	181.463	2.74272	7.84827e-12	6.02261e-10	LOC725344	NC_037638.1	15879931	15880843	+	913	protein_coding	histone H2B	Histone
100576446	1480.73	1493.76	950.394	450.292	362.725	418.591	1308.29	410.536	1.67171	8.9115e-12	6.73166e-10	LOC100576446	NC_037638.1	12514763	12530574	+	3436	protein_coding	solute carrier family 26 member 6%2C transcript variant X2	Sulfate_transp
novel.321	319.663	426.788	327.605	79.5217	72.9143	124.581	358.019	92.3389	1.95598	1.29483e-11	9.55701e-10	-	NC_037647.1	4950836	5004529	+	2797	-	-	-
550932	143947	122844	100813	33449.8	31060.6	49261.2	122534	37923.9	1.69201	1.68731e-11	1.21751e-09	Argk	NC_037652.1	2505071	2528532	+	4218	protein_coding	arginine kinase%2C transcript variant X1	-
409452	1604.02	2116.52	1177.33	541.742	496.555	439.521	1632.62	492.606	1.72827	2.84632e-11	2.00883e-09	LOC409452	NC_037643.1	6595121	6607651	-	3463	protein_coding	maltase A2%2C transcript variant X1	-
409171	11635.7	12287.6	10843.4	4672.89	5463.96	5859.28	11588.9	5332.04	1.11995	3.55163e-11	2.41836e-09	LOC409171	NC_037648.1	10428307	10450447	+	1970	protein_coding	esterase FE4%2C transcript variant X2	COesterase
413145	6127.26	5440.46	6576.83	2165.97	2516.93	2914.19	6048.18	2532.36	1.25608	4.68899e-11	3.14846e-09	LOC413145	NC_037648.1	15156648	15158032	+	996	protein_coding	eukaryotic translation initiation factor 3 subunit F	Mov34
100576170	16879.4	20919.1	27712.4	5119.21	5741.77	8174.48	21837	6345.15	1.78309	5.25686e-11	3.50542e-09	LOC100576170	NC_037646.1	2032180	2033682	+	1148	protein_coding	mucin-1	-
411223	1012.65	1421.9	467.519	156.061	48.9172	131.557	967.356	112.179	3.1089	6.50702e-11	4.30934e-09	LOC411223	NC_037644.1	8761491	8768116	+	4063	protein_coding	esterase FE4%2C transcript variant X1	COesterase
412540	2238.78	2697.91	2130.28	953.266	528.859	710.608	2355.66	730.911	1.68854	7.81637e-11	5.0759e-09	LOC412540	NC_037641.1	1808333	1874380	-	2554	protein_coding	carcinine transporter%2C transcript variant X2	Sugar_tr
410818	1148.5	926.522	848.018	215.703	123.677	308.96	974.348	216.113	2.17325	7.82199e-11	5.0759e-09	Eyg	NC_037639.1	14143423	14158506	+	4619	protein_coding	eyegone%2C transcript variant X1	PAX
410280	14696.5	16751.4	18633.4	8184.77	7900.58	7344.28	16693.8	7809.88	1.09598	8.4323e-11	5.39946e-09	LOC410280	NC_037648.1	16196034	16198862	+	2415	protein_coding	GTP-binding nuclear protein Ran%2C transcript variant X1	Ras
409932	5265.31	4678.34	4060.93	2089.43	2152.36	2218.53	4668.19	2153.44	1.11604	9.34788e-11	5.90749e-09	LOC409932	NC_037640.1	1959200	1966989	-	3051	protein_coding	b(0%2C+)-type amino acid transporter 1%2C transcript variant X1	-
410408	7439.02	8382.25	13041	3441.3	2746.75	2738.78	9620.77	2975.61	1.69308	1.06829e-10	6.70732e-09	LOC410408	NC_037650.1	2798876	2815667	+	7649	protein_coding	conserved ATPase domain protein%2C transcript variant X1	CPSase_L_D2
novel.204	36.5329	63.1472	58.0133	3.97609	2.7689	2.98994	52.5645	3.24497	4.02408	1.28039e-10	7.93598e-09	-	NC_037643.1	5268867	5276344	+	1488	-	-	-
102654691	13245.5	11823.8	13376.3	6371.68	6000.2	6907.75	12815.2	6426.54	0.99578	1.29141e-10	7.95326e-09	LOC102654691	NC_037646.1	5808371	5810669	-	1197	protein_coding	eukaryotic translation initiation factor eIF1	SUI1
410552	74.2075	96.8983	137.355	14.9103	19.3823	7.97316	102.82	14.0886	2.86586	1.35049e-10	8.26452e-09	LOC410552	NC_037651.1	9683316	9689463	+	3590	pseudogene	PF01061:ABC-2 type transporter|PF00005:ABC transporter	ABC2_membrane
409619	54590.5	58058.4	53545.4	13363.6	24047.9	18453.9	55398.1	18621.8	1.57283	1.3786e-10	8.38345e-09	LOC409619	NC_037644.1	10732918	10751840	-	8825	protein_coding	putative aminopeptidase-2%2C transcript variant X1	-
724412	1762.71	2138.29	2179.76	946.308	972.806	942.826	2026.92	953.98	1.08751	1.52475e-10	9.21428e-09	LOC724412	NC_037638.1	15484677	15496110	-	3574	protein_coding	muscle segmentation homeobox	Homeobox
412941	1348.29	1216.13	723.46	299.2	298.118	362.779	1095.96	320.032	1.7753	1.74077e-10	1.03261e-08	LOC412941	NC_037651.1	8251458	8267394	-	6191	protein_coding	synaptic vesicle glycoprotein 2B%2C transcript variant X5	Sugar_tr
725654	2031	2140.47	1556.12	818.08	766.984	834.192	1909.2	806.419	1.24301	1.92465e-10	1.12784e-08	LOC725654	NC_037647.1	8134604	8156050	+	3362	protein_coding	cell growth regulator with RING finger domain protein 1%2C transcript variant X2	-
725308	931.59	742.524	616.818	57.6532	54.455	191.356	763.644	101.155	2.91716	2.22191e-10	1.28645e-08	LOC725308	NC_037638.1	15879321	15879808	-	488	protein_coding	histone H2A	Histone
726184	8445.96	8421.44	6404.5	3379.67	3633.72	3356.7	7757.3	3456.7	1.16602	2.52025e-10	1.4505e-08	LOC726184	NC_037651.1	7534048	7544272	+	4299	protein_coding	uncharacterized LOC726184	bZIP_1
411011	589.094	573.768	592.077	164.014	220.589	259.128	584.98	214.577	1.44687	2.68785e-10	1.5378e-08	LOC411011	NC_037641.1	11179835	11196776	-	4016	protein_coding	guanine nucleotide-binding protein G(s) subunit alpha	G-alpha
410371	4786.96	4719.71	5820.1	1548.69	1766.56	2378	5108.92	1897.75	1.42886	2.75961e-10	1.56418e-08	LOC410371	NC_037649.1	8222143	8264030	-	10972	protein_coding	calcium-transporting ATPase sarcoplasmic/endoplasmic reticulum type%2C transcript variant X6	E1-E2_ATPase
727081	2003.6	2710.97	2283.85	1049.69	886.047	737.517	2332.81	891.084	1.38845	2.76631e-10	1.56418e-08	LOC727081	NC_037651.1	9763973	9780478	-	3228	protein_coding	uncharacterized LOC727081%2C transcript variant X2	-
409406	4702.47	4381.11	5406.33	2089.43	1839.47	2403.91	4829.97	2110.94	1.19433	2.82423e-10	1.58765e-08	LOC409406	NC_037640.1	10253470	10256425	-	1031	protein_coding	probable nuclear transport factor 2%2C transcript variant X2	-
410441	2054.98	2108.9	2004.87	1136.17	1088.18	1067.41	2056.25	1097.25	0.906044	2.89635e-10	1.61878e-08	LOC410441	NC_037650.1	5264741	5270028	-	2055	protein_coding	secretory carrier-associated membrane protein 5B%2C transcript variant X1	-
551663	1550.37	1482.87	459.841	212.721	194.746	147.503	1164.36	184.99	2.6534	2.94868e-10	1.63855e-08	LOC551663	NC_037645.1	8477442	8559807	+	5607	protein_coding	disintegrin and metalloproteinase domain-containing protein 11%2C transcript variant X2	-
408928	17008.4	19224	30821.3	5750.41	6008.51	8068.84	22351.2	6609.25	1.75784	3.79746e-10	2.07569e-08	Hsp90	NC_037644.1	9550759	9553976	+	2820	protein_coding	heat shock protein 90	HATPase_c
726944	1083.43	1265.12	951.248	318.087	311.039	482.376	1099.93	370.501	1.5699	3.79974e-10	2.07569e-08	LOC726944	NC_037638.1	11565443	11582132	+	2686	protein_coding	ATP-binding cassette sub-family G member 4%2C transcript variant X2	ABC2_membrane
100578068	726.092	745.79	795.123	284.29	152.289	264.111	755.669	233.563	1.69507	3.94724e-10	2.14415e-08	LOC100578068	NC_037647.1	3001795	3046330	-	7745	protein_coding	lateral signaling target protein 2 homolog	-
724734	377.888	499.734	385.618	159.043	175.363	152.487	421.08	162.298	1.37447	4.45145e-10	2.40453e-08	LOC724734	NC_037639.1	15268103	15273587	+	3051	protein_coding	hemicentin-1%2C transcript variant X2	V-set
410578	2016.16	4061.02	2190	599.395	871.279	592.007	2755.73	687.561	2.00261	4.67268e-10	2.51001e-08	LOC410578	NC_037652.1	8842671	8868948	+	9688	protein_coding	sodium- and chloride-dependent glycine transporter 2%2C transcript variant X3	-
410278	4300.61	3339.18	3449.23	513.909	1189.7	399.655	3696.34	701.089	2.39807	4.85922e-10	2.59579e-08	LOC410278	NC_037648.1	16150026	16160914	+	4047	protein_coding	putative inorganic phosphate cotransporter%2C transcript variant X3	MFS_1
413517	18233.4	20616.5	23743.6	4801.12	6507.83	8864.16	20864.5	6724.37	1.6336	5.28263e-10	2.80647e-08	LOC413517	NC_037652.1	2813584	2816883	+	1621	protein_coding	phosphate carrier protein%2C mitochondrial	Mito_carr
409586	1163.35	1146.45	1185.86	544.724	534.397	633.866	1165.22	570.996	1.02934	5.75413e-10	3.04025e-08	LOC409586	NC_037646.1	1291780	1292971	+	676	protein_coding	NADH dehydrogenase [ubiquinone] 1 beta subcomplex subunit 9	-
406075	73397	82391.8	95508.7	23356.5	32468.1	37172.9	83765.8	30999.2	1.43414	7.69663e-10	4.0445e-08	Ant	NC_037644.1	10937513	10940303	-	1242	protein_coding	ADP/ATP translocase	Mito_carr
411677	1494.43	1720.22	1551	269.38	494.71	585.031	1588.55	449.707	1.82053	8.09792e-10	4.23237e-08	LOC411677	NC_037641.1	12656342	12657424	-	514	protein_coding	mitochondrial pyruvate carrier 1	-
726629	1332.31	1988.05	1562.95	629.216	588.852	711.605	1627.77	643.224	1.33964	9.61859e-10	4.89573e-08	LOC726629	NC_037646.1	8481384	8483045	-	714	protein_coding	uncharacterized LOC726629	-
100578709	1379.12	1150.8	1324.92	631.204	482.711	584.034	1284.95	565.983	1.18326	9.62032e-10	4.89573e-08	LOC100578709	NC_037648.1	15641430	15653164	-	4869	protein_coding	uncharacterized LOC100578709%2C transcript variant X1	-
411269	3487.75	2897.15	2380.25	971.159	998.649	1322.55	2921.72	1097.45	1.41251	9.75691e-10	4.93925e-08	LOC411269	NC_037645.1	7648138	7651060	-	2365	protein_coding	solute carrier family 35 member E1 homolog	-
113219383	1721.61	1213.95	1369.28	435.381	588.852	325.903	1434.95	450.045	1.67228	1.02529e-09	5.14377e-08	LOC113219383	NW_020555904.1	5820	9848	-	4029	rRNA	large subunit ribosomal RNA	-
100578621	4359.98	7234.71	4861.17	1685.86	2213.27	1694.3	5485.29	1864.48	1.55669	1.1645e-09	5.67457e-08	LOC100578621	NC_037638.1	256975	325770	-	7463	protein_coding	uncharacterized LOC100578621%2C transcript variant X4	-
100577607	2929.49	2200.35	1983.54	942.332	921.12	646.823	2371.13	836.758	1.50235	1.1679e-09	5.67457e-08	LOC100577607	NC_037647.1	381765	383919	+	1163	protein_coding	dehydrogenase/reductase SDR family member 4	adh_short
406132	543.428	463.805	473.491	111.33	73.8372	181.389	493.575	122.186	2.01542	1.18501e-09	5.72894e-08	LOC406132	NC_037638.1	15189245	15189759	-	515	protein_coding	histone H4	-
novel.10	135.857	50.0823	104.083	6.95815	14.7674	11.9597	96.6739	11.2284	3.10164	1.33988e-09	6.41351e-08	-	NC_037638.1	4704021	4708758	+	2213	-	-	-
412528	236.322	311.381	181.718	71.5695	77.5291	56.8088	243.141	68.6358	1.82187	1.41098e-09	6.72059e-08	LOC412528	NC_037638.1	5041799	5054261	-	3348	protein_coding	eyes absent homolog 4%2C transcript variant X1	-
726072	1632.57	1959.74	1477.63	735.576	413.489	445.5	1689.98	531.522	1.66891	1.44576e-09	6.85246e-08	LOC726072	NC_037641.1	77830	89746	+	883	protein_coding	putative defense protein 3	-
409208	1717.05	1082.21	615.112	204.768	197.515	304.973	1138.12	235.752	2.27099	1.59855e-09	7.53969e-08	LOC409208	NC_037649.1	7331981	7345379	-	4055	protein_coding	bumetanide-sensitive sodium-(potassium)-chloride cotransporter	AA_permease
726447	667.868	516.065	690.188	71.5695	59.0698	192.353	624.707	107.664	2.53793	1.909e-09	8.91699e-08	LOC726447	NC_037638.1	15185754	15186376	-	623	protein_coding	histone H2B	Histone
409696	669.01	594.455	775.501	282.302	317.5	304.973	679.655	301.592	1.1729	2.19085e-09	1.00873e-07	LOC409696	NC_037646.1	6604215	6606213	-	1533	protein_coding	splicing factor 45	G-patch
411104	352.771	221.015	298.598	90.4559	71.9913	105.644	290.795	89.3639	1.70334	2.21278e-09	1.014e-07	LOC411104	NC_037642.1	9759539	9789529	-	6524	protein_coding	homeobox protein Nkx-2.4	-
724299	555.986	393.037	610.846	156.061	160.596	212.285	519.956	176.314	1.56135	2.25531e-09	1.02861e-07	LOC724299	NC_037639.1	15135524	15151122	-	6379	protein_coding	peripheral-type benzodiazepine receptor-associated protein 1%2C transcript variant X6	SH3_2
102654427	413.279	720.749	425.715	180.912	106.141	114.614	519.914	133.889	1.95748	2.53821e-09	1.14682e-07	LOC102654427	NC_037651.1	6444140	6447775	+	2322	protein_coding	sodium-dependent nutrient amino acid transporter 1%2C transcript variant X2	SNF
novel.157	188.373	137.182	107.495	21.8685	37.8416	12.9564	144.35	24.2221	2.56758	2.7511e-09	1.23723e-07	-	NC_037641.1	3315775	3320238	-	3046	-	-	-
725254	595.944	632.561	479.463	152.085	83.0669	32.8893	569.322	89.3472	2.67163	2.89321e-09	1.29303e-07	LOC725254	NC_037641.1	8652462	8660601	+	2393	protein_coding	endothelial zinc finger protein induced by tumor necrosis factor alpha	zf-AD
551235	3858.79	3001.67	3891.16	1559.62	1789.63	1680.34	3583.87	1676.53	1.09607	3.38558e-09	1.48796e-07	LOC551235	NC_037640.1	12300262	12304268	+	2442	protein_coding	ATP-binding cassette sub-family E member 1	ABC_tran
408411	712.392	752.323	744.788	290.254	118.14	178.399	736.501	195.598	1.91373	3.43732e-09	1.49709e-07	LOC408411	NC_037650.1	4189927	4280836	+	5015	protein_coding	transcription factor Sox-2%2C transcript variant X1	-
410745	186.09	337.511	770.383	24.8505	58.1468	67.7719	431.328	50.2564	3.10219	3.64899e-09	1.58216e-07	LOC410745	NC_037638.1	6881428	6886330	-	3270	protein_coding	glucose dehydrogenase [FAD%2C quinone]%2C transcript variant X2	-
725570	1259.24	1187.82	935.891	526.831	491.018	407.628	1127.65	475.159	1.24613	4.08614e-09	1.75263e-07	LOC725570	NC_037643.1	5156724	5165376	+	2351	protein_coding	tumor necrosis factor alpha-induced protein 8-like protein%2C transcript variant X10	-
408473	477.212	617.318	567.336	117.295	157.827	232.218	553.955	169.113	1.71223	4.09653e-09	1.75263e-07	LOC408473	NC_037651.1	8988151	9008875	-	4165	protein_coding	uncharacterized LOC408473	-
410733	44051.9	72228.4	52102.8	10712.6	7987.34	20477.1	56127.7	13059	2.10368	5.99703e-09	2.54322e-07	LOC410733	NC_037638.1	8341631	8401769	-	2717	protein_coding	glucose dehydrogenase [FAD%2C quinone]%2C transcript variant X3	-
726653	648.46	781.719	757.585	242.541	225.204	353.809	729.255	273.851	1.41381	6.13691e-09	2.59117e-07	LOC726653	NC_037642.1	6596910	6598694	+	1202	protein_coding	mitochondrial import inner membrane translocase subunit TIM14%2C transcript variant X3	-
726337	1435.06	1295.61	1716.51	505.957	670.073	685.692	1482.39	620.574	1.25651	6.37695e-09	2.68082e-07	LOC726337	NC_037642.1	11271301	11272888	+	1264	protein_coding	mitochondrial intermembrane space import and assembly protein 40-B%2C transcript variant X2	-
409368	4893.13	4584.7	3964.53	2218.66	2249.27	2434.8	4480.79	2300.91	0.961392	6.58123e-09	2.75471e-07	LOC409368	NC_037645.1	7703999	7711354	-	3018	protein_coding	interferon-related developmental regulator 1-like	-
551587	584.527	622.762	668.859	258.446	298.118	321.916	625.383	292.827	1.09524	6.9725e-09	2.89344e-07	LOC551587	NC_037647.1	10911967	10937931	-	4153	protein_coding	RNA-binding protein 24%2C transcript variant X1	-
725936	3591.64	4037.07	2490.31	1299.19	949.732	1366.4	3373.01	1205.11	1.48481	7.21243e-09	2.95496e-07	LOC725936	NC_037644.1	8767723	8847638	-	33983	protein_coding	titin homolog	Pkinase
409514	530.869	498.645	481.169	224.649	211.359	263.114	503.561	233.041	1.1116	7.57897e-09	3.09203e-07	LOC409514	NC_037653.1	3136798	3168485	+	2192	protein_coding	uncharacterized LOC409514	-
100578420	3648.73	3635.32	1001.58	523.849	506.708	499.319	2761.88	509.959	2.43697	7.74309e-09	3.14571e-07	LOC100578420	NC_037639.1	5329094	5383658	+	3180	protein_coding	uncharacterized LOC100578420%2C transcript variant X3	PDZ
724868	19199.2	18970.3	19240.8	8875.62	10471	10987	19136.8	10111.2	0.920384	8.60358e-09	3.46617e-07	LOC724868	NC_037642.1	5473930	5475282	-	642	protein_coding	40S ribosomal protein S11	-
107966053	325.372	482.314	445.337	87.4739	167.98	96.6746	417.674	117.376	1.83001	9.60496e-09	3.85354e-07	LOC107966053	NC_037638.1	20600964	20608519	+	2482	protein_coding	uncharacterized LOC107966053%2C transcript variant X6	-
550970	1245.55	851.398	656.915	286.278	299.964	333.876	917.953	306.706	1.58077	9.72889e-09	3.88714e-07	LOC550970	NC_037644.1	12138691	12166430	-	3321	protein_coding	lysophosphatidylcholine acyltransferase%2C transcript variant X1	Acyltransferase
724793	8290.69	8742.62	10380.1	4115.25	4361.93	4962.3	9137.81	4479.83	1.0285	9.81276e-09	3.90451e-07	LOC724793	NC_037641.1	8530002	8533910	-	1314	protein_coding	ubiquitin-conjugating enzyme E2-17 kDa	UQ_con
552425	3961.54	1955.39	141.621	29.8206	15.6904	24.9161	2019.52	23.4757	6.42713	1.08539e-08	4.30109e-07	LOC552425	NC_037638.1	6907202	6912540	-	3098	protein_coding	glucose dehydrogenase [FAD%2C quinone]%2C transcript variant X1	-
725967	729.517	658.691	874.465	374.746	302.733	302.98	754.224	326.82	1.20752	1.13395e-08	4.47516e-07	LOC725967	NC_037645.1	2704495	2708002	+	2229	protein_coding	D-3-phosphoglycerate dehydrogenase%2C transcript variant X1	2-Hacid_dh_C
100576369	1340.3	1438.23	1601.34	605.359	787.29	678.715	1459.96	690.455	1.08039	1.18504e-08	4.65778e-07	LOC100576369	NC_037646.1	1372140	1417296	-	4569	protein_coding	ets DNA-binding protein pokkuri%2C transcript variant X4	Ets
100578060	69.6409	40.2836	46.0694	4.97011	1.84593	7.97316	51.998	4.92973	3.4097	1.19137e-08	4.6637e-07	LOC100578060	NC_037638.1	19775881	19777537	+	1570	protein_coding	uncharacterized LOC100578060	-
410583	21990.5	23385.1	18618	5482.03	4943.4	9831.9	21331.2	6752.45	1.6595	1.45871e-08	5.64171e-07	LOC410583	NC_037652.1	7617390	7619211	+	1481	protein_coding	ornithine aminotransferase%2C mitochondrial	Aminotran_3
413503	117.59	109.963	97.2576	35.7848	25.843	15.9463	108.27	25.858	2.06424	1.65774e-08	6.38592e-07	LOC413503	NC_037640.1	12826356	13064149	+	8245	protein_coding	TWiK family of potassium channels protein 18-like	Ion_trans_2
411095	2374.64	1877	1736.13	699.791	754.986	995.648	1995.92	816.808	1.28882	1.75433e-08	6.7046e-07	LOC411095	NC_037642.1	8838191	8841522	-	2893	protein_coding	zinc transporter 7	-
409645	1083.43	1093.1	1556.12	437.369	488.249	576.061	1244.22	500.56	1.31433	1.86666e-08	7.07793e-07	LOC409645	NC_037644.1	12318181	12319770	+	894	protein_coding	MAPK regulated corepressor interacting protein 2	-
409490	20311.2	23188.1	11073.7	6451.2	4894.49	5886.19	18191	5743.96	1.66308	1.8889e-08	7.1343e-07	GstD1	NC_037652.1	9011536	9016677	+	1503	protein_coding	glutathione S-transferase D1	GST_N
408805	1014.93	1146.45	921.388	247.511	304.579	478.39	1027.59	343.493	1.58093	1.93969e-08	7.29761e-07	LOC408805	NC_037641.1	8519205	8526427	-	1986	protein_coding	progestin and adipoQ receptor family member 3%2C transcript variant X1	-
novel.404	171.248	163.312	209.872	70.5755	70.1454	56.8088	181.477	65.8432	1.46439	1.96101e-08	7.34924e-07	-	NC_037649.1	11280162	11323768	-	7048	-	PF04831:Popeye protein conserved region	-
550870	232.898	166.578	123.705	43.7369	49.8401	51.8255	174.393	48.4675	1.84365	2.00111e-08	7.47056e-07	LOC550870	NC_037643.1	5459331	5654764	+	4322	protein_coding	uncharacterized LOC550870	SH2
552707	3825.68	2880.82	3609.62	1358.83	1424.14	1797.95	3438.71	1526.97	1.17127	2.04841e-08	7.61771e-07	LOC552707	NC_037650.1	3847399	3851349	+	3304	protein_coding	protein CDV3 homolog	-
726399	3889.62	3158.45	3634.36	1194.81	1332.76	1860.74	3560.81	1462.77	1.28356	2.20521e-08	8.13822e-07	LOC726399	NC_037644.1	22658	44511	-	6049	protein_coding	transcriptional activator protein Pur-beta%2C transcript variant X2	-
725091	843.683	819.825	1031.44	325.045	327.653	459.453	898.317	370.717	1.27776	2.31073e-08	8.46304e-07	LOC725091	NC_037639.1	15455635	15484762	-	3799	protein_coding	lachesin%2C transcript variant X2	I-set
410017	1899.71	1759.41	2027.91	984.081	1009.72	1090.33	1895.68	1028.05	0.883078	2.55585e-08	9.31472e-07	LOC410017	NC_037645.1	2796401	2798235	+	1380	protein_coding	protein OPI10 homolog	-
726914	331.08	379.972	388.177	174.948	145.829	113.618	366.41	144.798	1.33997	2.56254e-08	9.31472e-07	LOC726914	NC_037642.1	13778869	13787241	-	6487	protein_coding	probable serine/threonine-protein kinase DDB_G0272282	-
726270	19448.1	20129.8	19521.5	10494.9	11838.9	11719.6	19699.8	11351.1	0.795337	2.68792e-08	9.73389e-07	LOC726270	NC_037647.1	5752275	5753292	+	648	protein_coding	40S ribosomal protein S19	-
551852	4155.62	3944.52	3816.08	2155.04	2279.72	2373.01	3972.08	2269.26	0.807575	2.70891e-08	9.77332e-07	LOC551852	NC_037641.1	5144487	5148801	+	2217	protein_coding	ubiquitin-conjugating enzyme E2-17 kDa%2C transcript variant X1	UQ_con
409887	2222.8	2204.71	3393.78	1067.58	1081.72	1088.34	2607.1	1079.21	1.27285	2.91754e-08	1.04869e-06	LOC409887	NC_037638.1	24154090	24158167	-	2428	protein_coding	transcription factor Dp-1	E2F_TDP
410769	10166.4	9454.66	11908.9	5193.76	5798.07	4710.14	10510	5233.99	1.00581	3.02771e-08	1.08426e-06	LOC410769	NC_037638.1	816289	820618	+	3729	protein_coding	puromycin-sensitive aminopeptidase%2C transcript variant X1	-
551169	2726.27	2861.22	3068.73	1278.31	1478.59	1645.46	2885.41	1467.45	0.975591	3.06262e-08	1.09271e-06	LOC551169	NC_037640.1	8345405	8347384	+	1052	protein_coding	succinate dehydrogenase [ubiquinone] iron-sulfur subunit%2C mitochondrial	-
410852	974.973	813.292	706.397	227.631	283.35	390.685	831.554	300.555	1.46781	3.175e-08	1.12864e-06	LOC410852	NC_037639.1	12306207	12420287	+	9078	protein_coding	protein Fe65 homolog%2C transcript variant X1	PID
410734	118309	121978	73201.7	12606.2	7698.46	32605.2	104496	17636.6	2.5668	3.32603e-08	1.178e-06	LOC410734	NC_037638.1	8332219	8335123	-	2090	protein_coding	glucose dehydrogenase [FAD%2C quinone]	-
725076	21619.5	20173.4	29506.6	8791.12	11140.2	10766.8	23766.5	10232.7	1.21577	3.38379e-08	1.18974e-06	LOC725076	NC_037646.1	6607526	6612801	+	3808	protein_coding	CCHC-type zinc finger protein CG3800%2C transcript variant X1	zf-CCHC
552564	17087.1	16572.9	17156.6	9005.83	9576.69	10459.8	16938.9	9680.77	0.807151	3.46903e-08	1.21529e-06	LOC552564	NC_037653.1	5208227	5209861	+	718	protein_coding	40S ribosomal protein S7	-
novel.360	180.381	136.093	149.299	19.8804	28.6119	54.8155	155.258	34.4359	2.17369	3.59563e-08	1.2551e-06	-	NC_037648.1	14194029	14198376	+	3764	-	-	-
102653857	65.0743	33.7511	62.279	6.95815	4.61483	8.96981	53.7015	6.84759	2.97922	3.64573e-08	1.26801e-06	LOC102653857	NC_037639.1	12595178	12595889	+	712	protein_coding	uncharacterized LOC102653857	-
408463	3050.5	3511.2	3854.47	1838.94	1609.65	1312.58	3472.06	1587.06	1.12957	3.93418e-08	1.35856e-06	LOC408463	NC_037651.1	8032761	8058886	+	8505	protein_coding	uncharacterized LOC408463%2C transcript variant X8	-
724909	3419.26	2052.28	1183.3	476.136	485.48	668.749	2218.28	543.455	2.02897	4.02587e-08	1.38527e-06	LOC724909	NC_037647.1	11830438	11835704	+	2849	protein_coding	uncharacterized LOC724909%2C transcript variant X1	-
411193	881.357	825.268	934.185	454.268	491.941	471.413	880.27	472.541	0.897775	4.26302e-08	1.45651e-06	LOC411193	NC_037644.1	13760993	13762541	+	1201	protein_coding	nuclear transcription factor Y subunit B-1%2C transcript variant X1	-
113218532	218.056	271.097	319.073	112.324	107.064	89.6981	269.409	103.029	1.38864	4.67739e-08	1.58687e-06	LOC113218532	NC_037650.1	10429411	10431509	-	1920	protein_coding	protein bowel-like	-
725571	36519.2	32052.6	23274.4	9749.36	5850.68	12559.7	30615.4	9386.59	1.70559	5.03192e-08	1.69525e-06	LOC725571	NC_037645.1	8239850	8243492	+	2835	protein_coding	protein transport protein Sec61 subunit alpha	-
408876	1335.74	1446.94	1516.88	819.074	691.301	773.397	1433.18	761.257	0.913263	5.16073e-08	1.72766e-06	LOC408876	NC_037643.1	14142853	14200146	-	3362	protein_coding	MOB kinase activator-like 2%2C transcript variant X6	-
552395	141.565	104.519	8.53137	2.98206	1.84593	0	84.872	1.60933	5.71433	5.16387e-08	1.72766e-06	LOC552395	NC_037638.1	6924396	6931775	-	3222	protein_coding	glucose dehydrogenase [FAD%2C quinone]	-
410639	790.025	987.491	1425.59	210.733	173.518	411.614	1067.7	265.288	2.00978	5.3406e-08	1.78063e-06	LOC410639	NC_037653.1	6739645	6750350	+	2375	protein_coding	alpha-methyldopa hypersensitive protein%2C transcript variant X1	-
102655272	1739.88	1792.07	2852.04	771.361	807.595	907.944	2128	828.966	1.36059	5.75562e-08	1.91241e-06	LOC102655272	NC_037648.1	7116133	7117143	-	793	protein_coding	NHP2-like protein 1	-
408727	403.004	307.026	522.973	102.384	98.7573	170.426	411.001	123.856	1.73234	5.88707e-08	1.94938e-06	LOC408727	NC_037640.1	12682649	12686045	-	2669	protein_coding	SET and MYND domain-containing protein 4-like	SET
552511	7691.33	7339.23	5941.24	3016.85	2607.38	3746.39	6990.6	3123.54	1.16221	6.32183e-08	2.0862e-06	LOC552511	NC_037648.1	14053071	14055264	-	1028	protein_coding	GTP:AMP phosphotransferase AK3%2C mitochondrial	ADK
724619	138.14	132.827	109.202	23.8565	42.4564	42.8557	126.723	36.3896	1.79634	6.61752e-08	2.17635e-06	LOC724619	NC_037650.1	1492946	1531475	-	2170	protein_coding	multiple inositol polyphosphate phosphatase 1%2C transcript variant X5	Acid_phosphat_A
725062	1051.46	908.013	1263.5	499.993	505.785	533.205	1074.32	512.994	1.06714	7.11796e-08	2.32512e-06	LOC725062	NC_037641.1	11567214	11568621	-	1223	protein_coding	39S ribosomal protein L4%2C mitochondrial	-
408429	9247.4	10375.7	9005.71	4548.64	5238.75	5544.34	9542.95	5110.58	0.900913	7.28213e-08	2.37074e-06	LOC408429	NC_037650.1	6004509	6151702	-	11057	protein_coding	tensin-1%2C transcript variant X3	-
409682	1855.19	1682.11	1274.59	463.214	658.074	736.521	1603.96	619.27	1.37257	7.34448e-08	2.38301e-06	LOC409682	NC_037652.1	8351263	8363159	-	3712	protein_coding	NADP-dependent malic enzyme%2C transcript variant X3	Malic_M
414032	381.313	255.855	336.136	118.289	118.14	145.51	324.434	127.313	1.34997	7.53933e-08	2.43805e-06	LOC414032	NC_037642.1	8457126	8486687	+	4121	protein_coding	tubulin polyglutamylase TTLL5%2C transcript variant X5	TTL
413356	4454.74	4876.49	5905.41	2201.76	1823.78	2670.01	5078.88	2231.85	1.18647	7.57811e-08	2.44242e-06	LOC413356	NC_037643.1	16104886	16110614	-	3228	protein_coding	UDP-glucose 6-dehydrogenase%2C transcript variant X2	-
551418	25808.2	24165.8	25691.4	13293	14676.1	15484.9	25221.8	14484.7	0.800146	7.8199e-08	2.51198e-06	LOC551418	NC_037638.1	21042691	21044720	+	765	protein_coding	60S ribosomal protein L13a	-
552641	3893.04	3632.05	3868.98	2072.53	1886.54	2301.25	3798.02	2086.78	0.864081	7.92135e-08	2.53614e-06	LOC552641	NC_037652.1	4475526	4476733	+	983	protein_coding	39S ribosomal protein L2%2C mitochondrial	Ribosomal_L2_C
408801	1146.22	1024.51	1337.72	479.118	568.547	609.947	1169.48	552.537	1.08217	8.02435e-08	2.56064e-06	LOC408801	NC_037641.1	9613735	9927200	-	17595	protein_coding	protein split ends%2C transcript variant X3	-
552285	2414.6	2962.47	2387.93	950.284	1374.3	1187	2588.33	1170.53	1.14463	8.91256e-08	2.82543e-06	LOC552285	NC_037643.1	16754545	16765703	-	3028	protein_coding	innexin inx7%2C transcript variant X3	-
410967	345.921	312.47	407.799	153.079	124.6	170.426	355.397	149.369	1.2528	9.32422e-08	2.94627e-06	LOC410967	NC_037640.1	3567413	3713212	-	5641	protein_coding	ABC transporter G family member 22%2C transcript variant X3	ABC2_membrane
410851	509.178	1375.08	768.676	270.374	224.281	165.443	884.313	220.033	2.00675	9.69795e-08	3.05438e-06	LOC410851	NC_037639.1	12420718	12442834	-	5420	protein_coding	bicaudal D-related protein homolog	-
551089	172.39	223.193	914.563	19.8804	47.9942	65.7786	436.715	44.5511	3.29419	1.02478e-07	3.21709e-06	LOC551089	NC_037644.1	13443389	13448355	-	2214	protein_coding	translation initiation factor IF-2	-
409930	8893.49	8902.67	8095.41	4134.13	4809.57	5124.75	8630.52	4689.49	0.879964	1.07252e-07	3.35606e-06	LOC409930	NC_037638.1	1840159	1841273	-	597	protein_coding	putative ATP synthase subunit f%2C mitochondrial	-
411046	1069.73	861.197	1310.42	470.172	494.71	494.336	1080.45	486.406	1.15204	1.08419e-07	3.38161e-06	LOC411046	NC_037641.1	4856002	5016122	-	4165	protein_coding	serine/threonine-protein phosphatase 2B catalytic subunit 2%2C transcript variant X1	Metallophos
413964	1194.17	862.286	982.814	452.28	506.708	363.775	1013.09	440.921	1.19963	1.14567e-07	3.5619e-06	LOC413964	NC_037652.1	7424818	7427993	+	1835	protein_coding	serine/threonine-protein kinase grp%2C transcript variant X1	Pkinase
726081	1368.84	1356.58	1556.12	784.283	815.902	795.323	1427.18	798.502	0.838192	1.21324e-07	3.75988e-06	LOC726081	NC_037643.1	13032257	13035398	-	2332	protein_coding	mitochondrial import receptor subunit TOM70	-
410013	15845	23568.1	14718.3	5935.3	5618.09	2217.54	18043.8	4590.31	1.97481	1.26808e-07	3.90665e-06	LOC410013	NC_037644.1	789807	839501	+	1892	protein_coding	calexcitin-2%2C transcript variant X1	-
novel.276	46.8078	38.1061	94.6982	1.98804	5.53779	9.96645	59.8707	5.83076	3.36678	1.30104e-07	3.96839e-06	-	NC_037645.1	4185267	4190205	+	977	-	-	-
100577980	736.367	799.139	686.775	351.884	420.872	337.863	740.76	370.206	0.999752	1.31985e-07	4.0131e-06	LOC100577980	NC_037647.1	10795067	10846321	-	3740	protein_coding	uncharacterized LOC100577980%2C transcript variant X3	-
novel.68	2215.95	1049.55	975.135	85.4858	8.30669	64.7819	1413.55	52.8582	4.74191	1.35132e-07	4.09589e-06	-	NC_037639.1	4430573	4434820	+	2630	-	-	-
726591	1314.04	1526.42	1069.83	363.812	398.721	641.839	1303.43	468.124	1.47728	1.39515e-07	4.21553e-06	LOC726591	NC_037638.1	20557814	20564060	-	3478	protein_coding	coiled-coil domain containing 13-like	-
724233	18082.7	18074.3	18653.8	9119.15	11271.3	10395	18270.3	10261.8	0.832202	1.5284e-07	4.60375e-06	LOC724233	NC_037638.1	4375803	4376815	+	567	protein_coding	40S ribosomal protein S17	-
725114	7869.42	8589.11	4986.58	3305.12	2267.73	2174.68	7148.37	2582.51	1.46878	1.60692e-07	4.79545e-06	LOC725114	NC_037652.1	5573219	5574053	+	446	protein_coding	chymotrypsin inhibitor	-
408358	861.949	852.487	1050.21	305.165	476.25	399.655	921.549	393.69	1.22704	1.62366e-07	4.83052e-06	LOC408358	NC_037648.1	12667196	12706589	+	7764	protein_coding	RB1-inducible coiled-coil protein 1%2C transcript variant X2	-
412460	4710.47	4536.8	5312.48	1547.69	2299.11	2474.67	4853.25	2107.16	1.20368	1.66978e-07	4.95248e-06	LOC412460	NC_037649.1	7680144	7683879	+	2395	protein_coding	putative cystathionine gamma-lyase 2%2C transcript variant X1	Cys_Met_Meta_PP
100577912	148.415	158.957	173.187	67.5935	51.6861	67.7719	160.186	62.3505	1.36464	1.68719e-07	4.98882e-06	LOC100577912	NC_037652.1	8088264	8178048	+	1260	protein_coding	uncharacterized protein C15orf61 homolog%2C transcript variant X1	-
100577669	788.883	341.866	473.491	131.211	148.597	186.373	534.747	155.394	1.78248	1.70809e-07	5.02365e-06	LOC100577669	NC_037643.1	9677279	9694376	-	5738	protein_coding	uncharacterized LOC100577669%2C transcript variant X3	-
102655332	1081.15	1193.26	1133.82	385.68	406.105	624.897	1136.08	472.227	1.26678	1.75042e-07	5.12705e-06	LOC102655332	NC_037644.1	2305115	2307862	+	2126	protein_coding	protein orai-2	-
727552	533.153	514.976	613.405	261.428	287.965	296.004	553.845	281.799	0.975702	1.75515e-07	5.12705e-06	LOC727552	NC_037646.1	5823529	5827417	-	1664	protein_coding	Y+L amino acid transporter 2%2C transcript variant X2	-
novel.415	79.9158	72.9459	96.4045	27.8326	23.0741	20.9295	83.0887	23.9454	1.79859	1.99416e-07	5.79026e-06	-	NC_037650.1	4188769	4189902	+	1134	-	-	-
550854	315.097	303.76	464.96	141.151	125.523	156.473	361.272	141.049	1.35952	2.06395e-07	5.97494e-06	LOC550854	NC_037649.1	2053305	2054702	-	947	protein_coding	protein PBDC1	-
novel.158	68.4993	64.2359	71.6635	4.97011	18.4593	13.953	68.1329	12.4608	2.44474	2.0773e-07	5.99564e-06	-	NC_037641.1	3325518	3331329	-	1274	-	-	-
410573	134.715	119.762	193.662	51.6891	39.6875	51.8255	149.38	47.7341	1.65111	2.12825e-07	6.11482e-06	LOC410573	NC_037652.1	9128176	9189933	-	7598	protein_coding	nephrin%2C transcript variant X2	-
550827	42409	45645.6	48336.2	23592.1	20921.8	27471.5	45463.6	23995.1	0.921987	2.13124e-07	6.11482e-06	LOC550827	NC_037643.1	13020093	13022252	+	1597	protein_coding	tubulin alpha-1 chain	Tubulin
412221	5189.96	4130.7	5339.78	2378.69	2719.98	2542.44	4886.81	2547.04	0.940113	2.14469e-07	6.1352e-06	LOC412221	NC_037641.1	5415172	5418271	-	1649	protein_coding	proliferation-associated protein 2G4	Peptidase_M24
409323	946.432	970.072	774.648	382.698	464.252	472.41	897.05	439.787	1.02756	2.20177e-07	6.27991e-06	LOC409323	NC_037648.1	2632969	2648016	-	4715	protein_coding	uncharacterized LOC409323	-
100578665	466.937	301.582	305.423	153.079	135.676	123.584	357.981	137.446	1.37966	2.25791e-07	6.42111e-06	LOC100578665	NC_037642.1	6373663	6449862	-	15465	protein_coding	uncharacterized LOC100578665%2C transcript variant X2	-
725555	2365.51	1904.21	2350.39	922.452	1248.77	1010.6	2206.7	1060.61	1.0569	2.27119e-07	6.43993e-06	LOC725555	NC_037644.1	12728783	12737454	-	3991	protein_coding	eukaryotic peptide chain release factor subunit 1%2C transcript variant X3	-
100578929	4218.41	4582.53	6177.56	2340.92	2440.32	2418.86	4992.83	2400.03	1.057	2.46e-07	6.93463e-06	LOC100578929	NC_037643.1	2426496	2431086	+	2217	protein_coding	uncharacterized LOC100578929	-
411380	11225.9	10960.4	10728.2	6016.81	7028.38	6225.05	10971.5	6423.41	0.772299	2.50497e-07	7.02044e-06	LOC411380	NW_020555815.1	30315	31398	+	501	protein_coding	60S ribosomal protein L30	-
100577569	135.857	123.028	130.53	32.8027	25.843	54.8155	129.805	37.8204	1.78224	2.66048e-07	7.41331e-06	LOC100577569	NC_037650.1	3451467	3464580	-	4502	protein_coding	uncharacterized LOC100577569%2C transcript variant X2	-
410539	23634.5	27710.7	24878.3	1995.99	6451.53	8246.24	25407.9	5564.59	2.19092	2.72063e-07	7.55914e-06	LOC410539	NC_037651.1	9021020	9028505	+	2360	protein_coding	protein 5NUC	Metallophos
409552	23510.1	24952.9	26269.8	11466	13743	14932.7	24910.9	13380.6	0.89665	2.93327e-07	8.10336e-06	LOC409552	NC_037647.1	9391860	9393150	+	693	protein_coding	40S ribosomal protein S10%2C transcript variant X1	-
100576418	6289.37	7414.35	3931.25	2186.85	2048.06	1063.42	5878.33	1766.11	1.73471	3.11487e-07	8.58053e-06	LOC100576418	NC_037652.1	5306954	5309145	+	1716	protein_coding	tetra-peptide repeat homeobox protein 1	-
409202	22740.6	22771.1	21815.6	10919.3	13850.9	12771	22442.4	12513.8	0.84269	3.1424e-07	8.63178e-06	LOC409202	NC_037651.1	1468975	1470803	+	719	protein_coding	40S ribosomal protein S9	S4
408964	5111.19	4900.44	5601.7	2288.24	2851.04	3021.83	5204.44	2720.37	0.935991	3.42131e-07	9.34482e-06	LOC408964	NC_037645.1	7682242	7697251	-	4828	protein_coding	ubiquitin carboxyl-terminal hydrolase Usp2%2C transcript variant X4	UCH
100577342	915.607	638.004	709.81	215.703	153.212	346.833	754.474	238.582	1.66146	3.63196e-07	9.86444e-06	LOC100577342	NC_037638.1	4532530	4535187	+	1173	protein_coding	uncharacterized LOC100577342	HLH
726529	256.872	288.517	262.766	128.229	104.295	69.7652	269.385	100.763	1.41832	3.71015e-07	1.00486e-05	LOC726529	NC_037640.1	6089671	6098344	+	1292	protein_coding	ankyrin repeat domain-containing protein 29	-
724531	13694.1	13559.2	14093	6400.5	7755.68	8375.81	13782.1	7510.66	0.875788	3.73147e-07	1.00781e-05	LOC724531	NC_037641.1	4819527	4820019	-	493	protein_coding	40S ribosomal protein S28	-
410332	1628	1463.27	1002.44	664.006	449.484	501.313	1364.57	538.268	1.34174	3.92062e-07	1.05595e-05	LOC410332	NC_037648.1	12501102	12517971	-	4084	protein_coding	breast cancer anti-estrogen resistance protein 3%2C transcript variant X3	SH2
107964189	655.31	733.814	657.768	238.565	368.263	317.93	682.297	308.253	1.14559	3.98539e-07	1.06744e-05	LOC107964189	NC_037640.1	2795440	2802901	+	7462	protein_coding	uncharacterized LOC107964189	-
551863	1907.7	1278.19	882.997	239.559	400.567	507.292	1356.3	382.473	1.82581	4.15985e-07	1.11109e-05	LOC551863	NC_037645.1	12611929	12619978	-	1955	protein_coding	putative inorganic phosphate cotransporter	MFS_1
411280	1173.62	1096.37	1452.89	578.52	598.082	685.692	1240.96	620.765	1.00002	4.22146e-07	1.12444e-05	LOC411280	NC_037645.1	8439269	8441500	+	1600	protein_coding	GTP-binding protein 128up	-
725458	485.203	804.582	578.427	225.643	210.436	292.017	622.737	242.699	1.35975	4.29569e-07	1.14107e-05	LOC725458	NC_037638.1	18587043	18589811	+	1777	protein_coding	hydroxylysine kinase%2C transcript variant X2	APH
novel.361	53.6578	10.8874	88.7262	0	0.922966	2.98994	51.0905	1.3043	5.30328	4.36622e-07	1.15663e-05	-	NC_037648.1	14208567	14211475	+	1461	-	-	-
408983	10860.6	9267.39	9248.86	4006.9	4021.36	5763.6	9792.27	4597.29	1.09086	4.54194e-07	1.19989e-05	LOC408983	NC_037646.1	11769248	11773945	+	3285	protein_coding	protein transport protein Sec23A%2C transcript variant X1	-
410343	2062.97	1967.36	3197.56	807.145	886.047	1158.1	2409.3	950.431	1.34234	4.83133e-07	1.26941e-05	LOC410343	NC_037648.1	13215400	13218668	-	2602	protein_coding	nuclear pore complex protein Nup93	-
408412	9451.76	8491.12	11548.9	2742.5	4368.4	4756.99	9830.6	3955.96	1.31328	4.96355e-07	1.29927e-05	LOC408412	NC_037650.1	4307133	4308827	-	1157	protein_coding	protein l(2)37Cc%2C transcript variant X1	-
102656183	2994.56	3022.36	3070.44	1523.83	1572.73	1920.54	3029.12	1672.37	0.857098	4.97189e-07	1.29927e-05	LOC102656183	NC_037650.1	3795324	3796441	+	787	protein_coding	histidine triad nucleotide-binding protein 1	HIT
552769	3009.4	2642.38	2380.25	1115.29	1078.02	1544.8	2677.35	1246.04	1.1034	5.01726e-07	1.3076e-05	LOC552769	NC_037648.1	14849353	14851124	+	1343	protein_coding	ubiA prenyltransferase domain-containing protein 1 homolog	UbiA
551460	1064.02	1378.35	1866.66	494.029	681.149	449.487	1436.35	541.555	1.40743	5.39979e-07	1.40349e-05	LOC551460	NC_037643.1	17106794	17214962	-	6795	protein_coding	homeobox protein cut%2C transcript variant X5	CUT
725665	7115.93	7619.04	7185.12	4048.65	4714.51	4101.19	7306.7	4288.12	0.768817	5.44082e-07	1.40657e-05	LOC725665	NC_037641.1	10652610	10660529	+	4714	protein_coding	5-oxoprolinase%2C transcript variant X1	Hydantoinase_B
102655706	326.513	316.825	364.289	166.002	169.826	177.403	335.876	171.077	0.974537	5.45522e-07	1.40657e-05	LOC102655706	NC_037639.1	3035118	3462535	-	5024	protein_coding	uncharacterized LOC102655706	-
409356	2009.31	1846.51	3020.1	987.063	1010.65	1017.57	2291.98	1005.1	1.18968	5.50945e-07	1.41678e-05	Smb	NC_037643.1	16462280	16463544	-	856	protein_coding	small ribonucleoprotein particle protein B	LSM
408278	113.024	120.851	81.9011	23.8565	14.7674	37.8725	105.259	25.4988	2.0474	5.64435e-07	1.44762e-05	LOC408278	NC_037647.1	11108360	11210337	-	5902	protein_coding	tyrosine-protein kinase Drl%2C transcript variant X1	-
726471	114.165	42.461	15.3565	4.97011	0.922966	1.99329	57.3277	2.62879	4.45333	5.81451e-07	1.48731e-05	LOC726471	NC_037649.1	8646651	8649782	+	2039	protein_coding	SET domain-containing protein SmydA-8%2C transcript variant X1	SET
726222	6241.43	6424.68	5845.69	2860.79	3265.45	3819.14	6170.6	3315.13	0.896311	6.12941e-07	1.55145e-05	LOC726222	NC_037643.1	16449332	16450110	-	506	protein_coding	ATP synthase subunit g%2C mitochondrial	-
725389	2348.38	2365.84	2468.98	1230.6	1505.36	1367.4	2394.4	1367.78	0.807782	6.28611e-07	1.58695e-05	LOC725389	NC_037647.1	10164599	10175712	-	3463	protein_coding	box A-binding factor%2C transcript variant X4	GATA
410414	1476.16	1667.96	2721.51	640.15	842.668	751.47	1955.21	744.763	1.39283	6.33676e-07	1.59558e-05	LOC410414	NC_037650.1	3522249	3526082	-	3110	protein_coding	116 kDa U5 small nuclear ribonucleoprotein component	GTP_EFTU
725918	1150.79	1176.93	1496.4	449.298	450.407	698.648	1274.71	532.784	1.25915	6.57704e-07	1.6475e-05	LOC725918	NC_037650.1	2163239	2165825	-	477	protein_coding	39S ribosomal protein L53%2C mitochondrial	-
412266	17170.5	17441.7	17770.8	10286.1	11339.6	10972.1	17461	10865.9	0.684327	6.64428e-07	1.66004e-05	LOC412266	NC_037640.1	10256265	10257980	+	1074	protein_coding	60S ribosomal protein L27%2C transcript variant X1	-
408982	1061.74	1034.31	915.416	422.459	428.256	592.007	1003.82	480.907	1.06157	7.14401e-07	1.78029e-05	LOC408982	NC_037646.1	11773432	11775399	-	1482	protein_coding	calcineurin B homologous protein 1	-
551044	106.174	335.333	337.842	63.6174	49.8401	60.7954	259.783	58.0843	2.16312	7.19364e-07	1.78805e-05	LOC551044	NC_037642.1	11669303	11678572	+	2431	protein_coding	glucose dehydrogenase [FAD%2C quinone]%2C transcript variant X2	-
727128	13119.9	13587.5	12991.6	7484.98	8564.2	8125.65	13233	8058.28	0.71557	7.21725e-07	1.78932e-05	LOC727128	NC_037651.1	9943789	9944869	+	521	protein_coding	60S ribosomal protein L34	-
409835	156.407	103.431	98.1107	37.7728	39.6875	40.8625	119.316	39.4409	1.5935	9.70152e-07	2.34983e-05	LOC409835	NC_037652.1	2155367	2173076	-	1871	protein_coding	E3 ubiquitin-protein ligase MARCH2%2C transcript variant X2	-
100578664	494.336	669.578	493.966	282.302	180.901	233.215	552.627	232.139	1.25162	1.03236e-06	2.4769e-05	LOC100578664	NC_037646.1	9549680	9559425	-	5130	protein_coding	organic solute transporter alpha-like protein%2C transcript variant X2	-
413137	18779.1	19103.1	20461.6	10657.9	12234.8	12132.2	19447.9	11675	0.736212	1.03503e-06	2.47715e-05	LOC413137	NC_037641.1	11936479	11938852	-	823	protein_coding	60S ribosomal protein L15	-
725943	19217.5	18563.1	18024.2	7748.4	9545.31	11339.8	18601.6	9544.51	0.962675	1.04458e-06	2.49384e-05	LOC725943	NC_037641.1	13147733	13148813	+	911	protein_coding	ubiquitin-60S ribosomal protein L40%2C transcript variant X1	ubiquitin
411808	679.284	779.541	897.5	341.943	406.105	427.561	785.442	391.87	1.00387	1.06274e-06	2.52741e-05	LOC411808	NC_037638.1	2155197	2179386	-	3108	protein_coding	proline dehydrogenase%2C mitochondrial	-
550715	24288.7	25191.4	23635.3	9794.09	13255.6	14221.1	24371.8	12423.6	0.972116	1.06387e-06	2.52741e-05	LOC550715	NC_037647.1	251938	255423	-	892	protein_coding	60S ribosomal protein L12%2C transcript variant X2	-
409589	22601.3	22808.1	22923.8	11007.8	13666.4	14023.8	22777.7	12899.3	0.820325	1.16246e-06	2.73475e-05	LOC409589	NC_037642.1	157405	158750	+	798	protein_coding	60S ribosomal protein L10%2C transcript variant X1	-
724915	187.231	194.885	255.941	71.5695	76.6061	103.651	212.686	83.9423	1.34431	1.16804e-06	2.74121e-05	LOC724915	NC_037651.1	3382655	3389494	+	2177	protein_coding	Usher syndrome type-1G protein homolog%2C transcript variant X2	-
100577332	3653.29	3512.29	3682.14	1656.04	1696.41	2281.32	3615.91	1877.92	0.945307	1.21789e-06	2.84439e-05	LOC100577332	NC_037645.1	7989376	8073457	-	9774	protein_coding	GATA-binding factor C%2C transcript variant X3	-
113218551	299.113	293.961	236.319	101.39	144.906	96.6746	276.464	114.323	1.27096	1.23777e-06	2.88385e-05	LOC113218551	NC_037639.1	12610496	12615322	-	1314	protein_coding	uncharacterized LOC113218551%2C transcript variant X1	-
novel.12	43.3829	19.5974	36.6849	0.994021	4.61483	1.99329	33.2217	2.53405	3.69433	1.24345e-06	2.89014e-05	-	NC_037638.1	4714066	4715306	+	754	-	-	-
725291	1085.71	1256.41	1173.92	360.83	547.319	622.903	1172.01	510.351	1.19937	1.27704e-06	2.96108e-05	LOC725291	NC_037651.1	5221393	5222719	-	575	protein_coding	probable 28S ribosomal protein S16%2C mitochondrial	-
novel.266	994.381	768.654	278.976	52.6831	5.53779	9.96645	680.67	22.7291	4.90562	1.40057e-06	3.22432e-05	-	NC_037644.1	13303026	13322572	-	3625	-	-	-
412127	480.637	519.331	622.79	202.78	247.355	296.004	540.919	248.713	1.12195	1.41723e-06	3.25492e-05	LOC412127	NC_037639.1	6958011	6958919	-	761	protein_coding	peptidyl-tRNA hydrolase 2%2C mitochondrial	PTH2
724216	18726.6	12657.7	6739.78	3979.07	1150.94	2979.97	12708	2703.32	2.23295	1.44798e-06	3.31766e-05	LOC724216	NC_037641.1	11486247	11487860	+	1221	protein_coding	juvenile hormone acid O-methyltransferase	Methyltransf_11
410094	1657.68	1683.2	1571.48	799.193	912.813	1027.54	1637.45	913.182	0.842351	1.5345e-06	3.49932e-05	LOC410094	NC_037640.1	10138006	10147363	-	1448	protein_coding	protein RER1%2C transcript variant X4	-
413363	1053.75	971.16	896.647	532.795	561.163	581.044	973.851	558.334	0.801985	1.58143e-06	3.581e-05	LOC413363	NC_037640.1	4467839	4470429	-	1894	protein_coding	F-box only protein 42	Kelch_1
113218983	1077.72	1194.35	1177.33	562.616	683.917	678.715	1149.8	641.75	0.841322	1.62041e-06	3.65217e-05	LOC113218983	NC_037646.1	1143873	1146838	-	842	protein_coding	60S ribosome subunit biogenesis protein NIP7 homolog	-
727483	1971.64	2156.8	1913.59	831.996	868.511	1231.85	2014.01	977.453	1.04302	1.6443e-06	3.69306e-05	LOC727483	NC_037641.1	5505958	5508205	+	529	protein_coding	protein stunted%2C transcript variant X1	-
551724	855.099	618.407	862.521	398.603	364.571	394.671	778.676	385.948	1.01316	1.6462e-06	3.69306e-05	LOC551724	NC_037647.1	11863163	11875149	+	1645	protein_coding	S-adenosylmethionine decarboxylase proenzyme	SAM_decarbox
726323	1589.18	1185.64	358.317	239.559	192.9	261.121	1044.38	231.193	2.17507	1.67717e-06	3.74516e-05	LOC726323	NC_037652.1	7694457	7708162	-	1301	protein_coding	uncharacterized LOC726323%2C transcript variant X3	-
551541	5067.8	5762.73	4845.82	1961.2	2060.98	3121.49	5225.45	2381.23	1.13387	1.78965e-06	3.96883e-05	LOC551541	NC_037641.1	13154850	13155889	-	614	protein_coding	uncharacterized LOC551541	-
413906	518.311	585.745	659.475	315.105	320.269	312.947	587.844	316.107	0.896123	1.81577e-06	4.01754e-05	LOC413906	NC_037648.1	8318742	8341747	+	3367	protein_coding	monocarboxylate transporter 10%2C transcript variant X4	MFS_1
552354	3025.38	3071.35	3474.83	1233.58	1856.08	1648.45	3190.52	1579.37	1.01444	1.84796e-06	4.07943e-05	LOC552354	NC_037650.1	6839300	6853696	-	2063	protein_coding	protein slowmo	MSF1
novel.193	994.381	927.61	778.061	529.813	405.182	400.651	900.017	445.216	1.01503	1.93107e-06	4.2532e-05	-	NC_037642.1	8093355	8100599	-	7245	-	-	-
725126	767.192	427.877	269.591	166.002	131.061	97.6712	488.22	131.578	1.8904	2.00226e-06	4.39997e-05	Dsx	NC_037642.1	3529523	3620990	+	7310	protein_coding	doublesex%2C transcript variant X1	-
408788	8756.49	11051.8	3735.89	1447.3	640.538	2550.41	7848.07	1546.08	2.34375	2.03737e-06	4.45686e-05	LOC408788	NC_037641.1	11596122	11618885	+	4421	protein_coding	UDP-glucuronosyltransferase 1-3	-
409225	2077.81	2141.56	2437.41	1271.35	1313.38	1368.39	2218.93	1317.71	0.752158	2.11642e-06	4.61933e-05	LOC409225	NC_037638.1	20587904	20590210	-	1497	protein_coding	NEDD8-conjugating enzyme Ubc12	UQ_con
408407	1894	1986.96	2225.83	1127.22	1222.01	1245.81	2035.6	1198.34	0.76471	2.13437e-06	4.64802e-05	LOC408407	NC_037650.1	3798077	3799166	+	651	protein_coding	translation machinery-associated protein 7 homolog	-
100578524	229.473	291.784	199.634	53.6772	96.9114	101.658	240.297	84.0821	1.51311	2.28943e-06	4.95225e-05	LOC100578524	NC_037648.1	1082662	1100870	-	7530	protein_coding	uncharacterized LOC100578524%2C transcript variant X1	-
413799	974.973	1056.08	1823.15	463.214	539.012	526.229	1284.74	509.485	1.33503	2.33756e-06	5.04505e-05	LOC413799	NC_037653.1	4513688	4515085	-	970	protein_coding	mitochondrial import inner membrane translocase subunit Tim17-A%2C transcript variant X1	-
726056	15574.5	16644.7	14445.3	8889.53	10085.2	9285.74	15554.8	9420.17	0.723491	2.4511e-06	5.27632e-05	LOC726056	NC_037638.1	25050884	25051893	-	637	protein_coding	60S ribosomal protein L21	-
100191002	16693.3	17517.9	15652.5	7725.53	9629.3	10263.5	16621.2	9206.09	0.852342	2.45562e-06	5.27632e-05	Rpl41	NC_037648.1	12183567	12184247	+	320	protein_coding	ribosomal protein L41	-
411291	4438.75	3946.7	2592.68	1458.23	1593.96	793.33	3659.38	1281.84	1.51315	2.50762e-06	5.3761e-05	LOC411291	NC_037646.1	11994692	11998851	+	1742	protein_coding	leucine-rich repeat-containing protein 58	-
725705	2182.84	2166.6	2992.8	566.592	793.75	1260.76	2447.42	873.7	1.48627	2.65376e-06	5.65372e-05	LOC725705	NC_037642.1	13106688	13107992	+	435	protein_coding	mitochondrial import inner membrane translocase subunit Tim13	-
726343	187.231	272.186	364.289	66.5994	96.9114	112.621	274.569	92.0439	1.57868	2.65466e-06	5.65372e-05	LOC726343	NC_037644.1	769780	772899	-	1238	protein_coding	uncharacterized LOC726343	-
551769	965.84	752.323	803.655	387.668	472.558	459.453	840.606	439.893	0.933708	2.66177e-06	5.6564e-05	LOC551769	NC_037652.1	5224824	5226496	+	1146	protein_coding	grpE protein homolog%2C mitochondrial	-
novel.339	654.168	671.755	533.21	340.949	343.343	303.977	619.711	329.423	0.91043	2.72611e-06	5.78044e-05	-	NC_037647.1	9367102	9369644	-	2489	-	-	-
113219341	143.848	126.294	141.621	57.6532	48.9172	24.9161	137.255	43.8288	1.64604	2.74345e-06	5.80447e-05	LOC113219341	NW_020555813.1	2142	4064	+	1923	rRNA	small subunit ribosomal RNA	-
100576783	139.282	53.3485	23.8878	4.97011	6.46076	10.9631	72.1727	7.46465	3.27027	2.75531e-06	5.81684e-05	LOC100576783	NC_037639.1	10114981	10117008	+	1477	protein_coding	odorant receptor 22c-like	-
552278	610.785	590.1	745.642	355.86	361.802	323.91	648.842	347.191	0.903066	2.83061e-06	5.96278e-05	LOC552278	NC_037640.1	6701869	6865750	+	2903	protein_coding	protein-tyrosine sulfotransferase%2C transcript variant X3	-
726582	1704.49	1092.01	904.325	583.491	438.409	395.668	1233.61	472.522	1.38399	2.89546e-06	6.08613e-05	LOC726582	NC_037651.1	7842488	7882776	+	3725	protein_coding	prominin-like protein%2C transcript variant X3	Prominin
408728	299.113	324.446	494.819	157.055	167.057	142.52	372.793	155.544	1.26297	2.90662e-06	6.09634e-05	LOC408728	NC_037640.1	12680524	12682235	+	990	protein_coding	mediator of RNA polymerase II transcription subunit 18	-
552809	3559.68	4186.22	4153.07	1579.5	1715.79	2430.82	3966.32	1908.7	1.05532	2.92876e-06	6.12831e-05	LOC552809	NC_037641.1	11909002	11909637	-	415	protein_coding	cytochrome c oxidase subunit NDUFA4	-
724628	780.892	692.442	834.368	466.196	383.031	408.625	769.234	419.284	0.87625	2.97103e-06	6.19114e-05	LOC724628	NC_037640.1	4591687	4592531	+	767	protein_coding	protein mago nashi homolog	-
409599	16946.7	17338.3	15798.4	8691.72	10531	10403	16694.5	9875.25	0.757448	3.10722e-06	6.43334e-05	LOC409599	NC_037646.1	7031549	7032824	-	595	protein_coding	60S ribosomal protein L35a%2C transcript variant X1	-
550734	2818.74	2970.1	3088.36	1910.51	1866.24	1817.88	2959.07	1864.88	0.666202	3.1395e-06	6.48628e-05	LOC550734	NC_037651.1	6356826	6359193	+	1436	protein_coding	thioredoxin-like protein 1	-
409224	619.918	795.872	685.069	224.649	322.115	379.722	700.287	308.829	1.18107	3.49523e-06	7.08498e-05	Coq7	NC_037642.1	9904790	9905480	+	607	protein_coding	ubiquinone biosynthesis protein COQ7	-
552142	536.578	652.158	631.321	359.836	306.425	271.087	606.686	312.449	0.957791	3.53934e-06	7.15939e-05	LOC552142	NC_037638.1	21819932	22182421	-	10873	protein_coding	latrophilin Cirl%2C transcript variant X2	7tm_2
100576967	436.112	480.136	673.125	230.613	183.67	267.101	529.791	227.128	1.22385	3.61745e-06	7.27984e-05	LOC100576967	NW_020555859.1	300604	301615	+	688	protein_coding	histone deacetylase complex subunit SAP18	-
551758	558.269	181.82	95.5513	48.707	47.9942	43.8524	278.547	46.8512	2.56999	3.62147e-06	7.27984e-05	LOC551758	NC_037642.1	10722909	10727264	+	2136	protein_coding	arylsulfatase B%2C transcript variant X2	Sulfatase
408702	908.757	1047.37	1010.11	534.783	599.928	440.517	988.748	525.076	0.912901	3.71503e-06	7.42567e-05	LOC408702	NC_037639.1	8658617	8660460	+	1324	protein_coding	SAGA-associated factor 29	-
726428	602.794	581.39	1065.57	339.955	263.045	206.306	749.917	269.769	1.47601	3.71706e-06	7.42567e-05	LOC726428	NC_037639.1	13705444	13710587	-	850	protein_coding	probable RNA-binding protein EIF1AD%2C transcript variant X1	-
411657	1028.63	330.978	171.48	49.7011	21.2282	11.9597	510.363	27.6297	4.20731	3.74976e-06	7.47556e-05	LOC411657	NC_037642.1	10728956	10734880	+	4053	protein_coding	arylsulfatase B%2C transcript variant X3	-
410468	2383.77	3667.98	3592.56	512.915	1519.2	775.39	3214.77	935.835	1.78023	3.79623e-06	7.55263e-05	LOC410468	NC_037650.1	8361770	8365083	+	2629	protein_coding	protein hairy	-
410487	1477.3	1428.43	1692.62	731.6	704.223	959.769	1532.79	798.531	0.941196	3.8219e-06	7.58808e-05	LOC410487	NC_037651.1	5128773	5149726	-	8919	protein_coding	uncharacterized LOC410487	-
100578238	41.0996	68.5909	61.4258	3.97609	16.6134	3.98658	57.0388	8.19202	2.78703	3.8688e-06	7.65704e-05	LOC100578238	NC_037649.1	6993525	6997714	-	3592	protein_coding	leucine-rich repeat transmembrane protein FLRT3	-
724622	476.07	433.32	569.042	216.697	214.128	284.044	492.811	238.29	1.04976	3.87247e-06	7.65704e-05	LOC724622	NC_037648.1	7030356	7038873	+	4361	protein_coding	DNA-binding protein RFX7	RFX_DNA_binding
551301	1359.71	1149.71	2467.27	536.772	606.388	689.678	1658.9	610.946	1.44163	4.16084e-06	8.21044e-05	LOC551301	NC_037645.1	2238728	2240862	+	1514	protein_coding	solute carrier family 25 member 40	Mito_carr
113219007	140.424	138.271	115.173	38.7668	49.8401	62.7886	131.289	50.4652	1.37754	4.25658e-06	8.3535e-05	LOC113219007	NC_037646.1	5515338	5537984	-	606	protein_coding	zinc finger protein 524-like	-
411175	2026.44	1832.36	1931.5	1203.76	1174.01	1239.83	1930.1	1205.87	0.678614	4.25926e-06	8.3535e-05	LOC411175	NC_037643.1	8401365	8459919	-	3730	protein_coding	protein groucho%2C transcript variant X1	-
725592	802.583	719.66	822.424	430.411	478.096	458.457	781.556	455.655	0.778567	4.28541e-06	8.38777e-05	LOC725592	NC_037643.1	5176939	5180253	+	2555	protein_coding	protein prenyltransferase alpha subunit repeat-containing protein 1	-
410420	2214.81	2044.66	1907.61	1042.73	1243.23	1263.75	2055.7	1183.24	0.796595	4.31617e-06	8.43092e-05	LOC410420	NC_037650.1	3760219	3761621	-	1058	protein_coding	isochorismatase domain-containing protein 2	Isochorismatase
551069	267.147	214.483	69.9572	33.7967	45.2253	41.8591	183.862	40.2937	2.1865	4.38617e-06	8.52778e-05	LOC551069	NC_037638.1	18453495	18534679	+	3799	protein_coding	diacylglycerol kinase 1%2C transcript variant X4	C1_1
408666	384.738	495.379	501.644	226.637	258.43	206.306	460.587	230.458	0.999379	4.39222e-06	8.52778e-05	LOC408666	NC_037639.1	14174417	14181276	+	1588	protein_coding	uncharacterized LOC408666%2C transcript variant X1	-
552774	14025.2	14213.6	13297.8	6508.85	8285.46	8660.85	13845.5	7818.39	0.824453	4.66425e-06	9.0378e-05	LOC552774	NC_037648.1	4260226	4262644	-	740	protein_coding	60S ribosomal protein L28%2C transcript variant X2	-
410100	6488.02	5411.06	6691.15	2611.29	3247.92	3754.36	6196.75	3204.52	0.951438	4.92196e-06	9.49909e-05	LOC410100	NC_037651.1	1588609	1592005	-	2467	protein_coding	eukaryotic translation initiation factor 3 subunit B	-
410403	2808.47	2394.15	2855.45	1370.76	1527.51	1692.3	2686.02	1530.19	0.811866	4.9911e-06	9.61334e-05	LOC410403	NC_037650.1	2488385	2490307	-	1100	protein_coding	proteasome activator complex subunit 3	-
550645	493.195	479.048	722.607	267.392	251.047	279.061	564.95	265.833	1.08932	5.01844e-06	9.64677e-05	LOC550645	NC_037638.1	6957465	6988656	-	7614	protein_coding	max-binding protein MNT%2C transcript variant X2	HLH
410555	444.104	867.73	847.165	266.398	310.116	176.406	719.666	250.973	1.5199	5.23511e-06	0.000100036	LOC410555	NC_037651.1	9782625	9790234	-	3693	protein_coding	insulin-like growth factor-binding protein complex acid labile subunit	-
102653862	2591.56	2624.96	2420.35	1241.53	1341.07	1668.38	2545.62	1417	0.845146	5.43754e-06	0.000103699	LOC102653862	NC_037651.1	1779550	1781440	+	600	protein_coding	NADH dehydrogenase [ubiquinone] 1 alpha subcomplex subunit 13	-
726061	1270.66	1208.51	1734.43	608.341	680.226	786.353	1404.53	691.64	1.0226	5.49902e-06	0.000104665	LOC726061	NC_037638.1	20142640	20143585	+	736	protein_coding	mitochondrial import inner membrane translocase subunit Tim10%2C transcript variant X3	-
413705	5848.7	8862.38	4382.56	304.171	164.288	997.642	6364.55	488.7	3.70312	5.79e-06	0.00010986	LOC413705	NC_037642.1	6546787	6550069	-	1926	protein_coding	acidic mammalian chitinase%2C transcript variant X1	CBM_14
102656685	979.54	902.569	905.178	390.65	491.018	570.081	929.096	483.916	0.9409	5.79469e-06	0.00010986	LOC102656685	NC_037646.1	1599501	1600533	+	703	protein_coding	39S ribosomal protein L42%2C mitochondrial%2C transcript variant X1	-
408368	4103.11	3566.73	4119.8	1391.63	1831.16	2363.05	3929.88	1861.95	1.07771	5.90381e-06	0.00011171	LOC408368	NC_037648.1	13232343	13236031	-	1527	protein_coding	adenosylhomocysteinase	-
408324	2833.59	2994.05	2920.29	1835.96	1942.84	1858.74	2915.97	1879.18	0.633851	6.01156e-06	0.000113085	LOC408324	NC_037648.1	16161825	16166927	+	2514	protein_coding	T-cell immunomodulatory protein	-
410258	12260.2	11830.3	14629.6	4718.62	5695.62	7840.61	12906.7	6084.95	1.08484	6.1601e-06	0.000115654	LOC410258	NC_037648.1	14055464	14059408	-	2653	protein_coding	selenide%2C water dikinase	-
412511	3638.45	3458.94	4802.31	1891.62	2184.66	2226.51	3966.57	2100.93	0.917064	6.19476e-06	0.00011608	LOC412511	NC_037638.1	4722480	4727235	-	2582	protein_coding	importin subunit alpha-3	Arm
102655391	30.8247	22.8636	232.053	8.94619	6.46076	5.97987	95.2472	7.12894	3.74503	6.24258e-06	0.00011675	LOC102655391	NC_037638.1	5606928	5609698	+	1989	protein_coding	dihydrolipoyl dehydrogenase%2C mitochondrial	Pyr_redox_2
552183	4022.05	3601.57	3677.02	2133.17	2223.42	2506.56	3766.88	2287.72	0.719421	6.3301e-06	0.000118158	LOC552183	NC_037639.1	15121500	15125234	+	2472	protein_coding	phosphatidylinositol transfer protein alpha isoform	IP_trans
408477	1690.79	1710.42	1551.86	865.793	980.189	1066.41	1651.02	970.797	0.765887	6.37843e-06	0.000118831	LOC408477	NC_037651.1	9288439	9289528	-	751	protein_coding	NADH dehydrogenase [ubiquinone] 1 beta subcomplex subunit 5%2C mitochondrial	-
409952	1605.17	1702.8	1598.78	951.278	757.755	1023.55	1635.58	910.863	0.844701	6.49558e-06	0.00012078	LOC409952	NC_037653.1	1149527	1178264	-	9488	protein_coding	uncharacterized LOC409952%2C transcript variant X2	Pkinase
411411	1928.25	1813.85	2124.31	932.392	1145.4	1208.93	1955.47	1095.57	0.835987	6.74868e-06	0.000124767	LOC411411	NC_037640.1	4374395	4375666	+	911	protein_coding	NADH dehydrogenase [ubiquinone] iron-sulfur protein 3%2C mitochondrial	-
102655603	4178.46	3734.39	3020.1	1609.32	1579.19	2204.58	3644.32	1797.7	1.01939	6.9571e-06	0.00012813	LOC102655603	NC_037645.1	3779917	3781482	+	1309	protein_coding	transmembrane emp24 domain-containing protein 7	-
410860	1060.6	738.169	974.282	489.059	341.497	475.4	924.349	435.318	1.08683	7.71399e-06	0.000140464	LOC410860	NC_037639.1	11752634	11765258	-	3805	protein_coding	battenin	-
100578885	273.997	279.807	373.674	115.306	153.212	156.473	309.159	141.664	1.12744	7.82709e-06	0.000142059	LOC100578885	NC_037639.1	4578555	4630712	-	11488	protein_coding	putative transcription factor capicua%2C transcript variant X7	HMG_box
100576383	5559.86	3767.06	4842.4	1724.63	2394.17	2568.35	4723.11	2229.05	1.08327	7.83095e-06	0.000142059	LOC100576383	NC_037641.1	5975873	6453452	-	11149	protein_coding	mannosyl-oligosaccharide 1%2C2-alpha-mannosidase IA%2C transcript variant X1	-
550663	2222.8	2150.27	2794.02	1370.76	1369.68	1371.38	2389.03	1370.61	0.801992	8.02557e-06	0.000145317	LOC550663	NC_037639.1	13723204	13746950	+	4527	protein_coding	putative oxidoreductase GLYR1 homolog	-
551882	3550.55	3434.99	2899.81	1561.61	1730.56	2096.94	3295.12	1796.37	0.875103	8.19915e-06	0.000147906	LOC551882	NC_037651.1	6613728	6614848	-	755	protein_coding	protein dj-1beta	DJ-1_PfpI
408979	16544.9	12458.5	13145.1	6680.82	8184.86	8137.61	14049.5	7667.76	0.8736	8.71073e-06	0.000156757	LOC408979	NC_037646.1	11809862	11825150	+	3484	protein_coding	eukaryotic translation initiation factor 5%2C transcript variant X1	-
412602	126226	132463	111864	56500.2	69747.6	78145.9	123518	68131.2	0.858326	8.72224e-06	0.000156757	LOC412602	NC_037647.1	4830752	4834077	-	2590	protein_coding	polyadenylate-binding protein 1	RRM_1
551261	1525.25	1658.16	1934.91	726.63	899.891	1034.52	1706.11	887.013	0.943997	8.82812e-06	0.000158072	LOC551261	NC_037645.1	6341188	6404309	-	7529	protein_coding	plasma membrane calcium-transporting ATPase 3%2C transcript variant X8	Cation_ATPase_C
552399	192.94	673.933	231.2	107.354	67.3765	81.7249	366.024	85.4852	2.09818	8.90172e-06	0.000159096	LOC552399	NC_037640.1	4852216	4870403	-	6553	protein_coding	uncharacterized LOC552399%2C transcript variant X2	-
406120	25344.7	26816.9	24819.5	13922.3	16603.2	16670.9	25660.4	15732.1	0.705814	8.96249e-06	0.000159886	RpLP1	NC_037647.1	10324175	10325596	-	565	protein_coding	ribosomal protein LP1	-
410527	4413.64	4603.21	5036.07	2601.35	2995.02	2126.84	4684.31	2574.41	0.863591	9.15652e-06	0.000162747	LOC410527	NC_037651.1	8384207	8399019	-	9874	protein_coding	probable cation-transporting ATPase 13A3%2C transcript variant X2	E1-E2_ATPase
100577365	327.655	252.589	168.068	85.4858	108.91	91.6914	249.437	95.3624	1.38378	9.30841e-06	0.000165143	LOC100577365	NC_037638.1	17704369	17769291	+	5522	protein_coding	homeobox protein invected%2C transcript variant X1	-
552445	40811.9	41231.8	45019.2	19867.5	27587.4	23981.3	42354.3	23812.1	0.830813	9.41345e-06	0.000166701	LOC552445	NC_037651.1	5020580	5025260	-	1378	protein_coding	60S ribosomal protein L3	-
726784	710.109	648.892	652.65	331.009	362.725	428.557	670.55	374.097	0.84179	9.4418e-06	0.00016689	LOC726784	NC_037641.1	12365805	12368067	-	2038	protein_coding	sphingosine-1-phosphate phosphatase 1	-
409528	33749.6	30832.2	31996	13573.4	19699.8	18706	32192.6	17326.4	0.893747	9.53318e-06	0.000167899	LOC409528	NC_037643.1	16111089	16113052	+	1022	protein_coding	60S ribosomal protein L7a	-
100578818	915.607	683.732	929.066	336.973	455.945	455.467	842.802	416.128	1.01827	1.00666e-05	0.00017665	LOC100578818	NC_037649.1	10856760	10977339	+	13823	protein_coding	amyloid beta A4 precursor protein-binding family B member 1-interacting protein%2C transcript variant X4	-
409825	11020.4	11148.7	16731.7	5154.99	6140.49	7155.91	12967	6150.47	1.07614	1.08298e-05	0.000188333	LOC409825	NC_037650.1	4386394	4389845	-	1978	protein_coding	T-complex protein 1 subunit epsilon	-
107965822	121.015	70.7684	186.837	26.8386	38.7646	38.8692	126.207	34.8241	1.86056	1.11133e-05	0.00019257	LOC107965822	NW_020555850.1	13129	17388	+	3789	protein_coding	retrovirus-related Pol polyprotein from type-1 retrotransposable element R2	RVT_1
411231	227.189	225.37	273.857	109.342	121.831	133.55	242.139	121.575	0.995943	1.12049e-05	0.000193811	LOC411231	NC_037644.1	2346358	2347968	+	1141	protein_coding	general transcription factor IIH subunit 3	-
411330	9688.08	16597.9	38601.9	2251.46	4507.76	7086.15	21629.3	4615.12	2.22857	1.14768e-05	0.000198159	LOC411330	NC_037646.1	8460197	8473671	-	3082	protein_coding	uncharacterized LOC411330	-
552457	149.557	180.732	162.096	86.4799	64.6076	75.745	164.128	75.6108	1.11959	1.15562e-05	0.000198884	LOC552457	NC_037638.1	6891497	6897169	-	3074	protein_coding	glucose dehydrogenase [FAD%2C quinone]	-
409857	744.359	619.496	717.488	390.65	407.028	419.588	693.781	405.755	0.773998	1.15805e-05	0.000198884	LOC409857	NC_037640.1	11057227	11058679	+	1129	protein_coding	ribosomal RNA small subunit methyltransferase NEP1	-
552334	819.708	824.18	1310.42	458.244	400.567	500.316	984.769	453.042	1.12123	1.21037e-05	0.000206767	LOC552334	NC_037653.1	2722483	2723595	+	1012	protein_coding	splicing factor 3A subunit 2	-
100576085	2956.89	3037.6	2880.19	1688.84	1619.8	2022.19	2958.22	1776.95	0.735369	1.22536e-05	0.000208592	LOC100576085	NC_037646.1	896822	908789	-	2469	protein_coding	ras-related protein Rab-8A%2C transcript variant X2	Ras
409862	3057.35	2957.03	3654.84	2007.92	1884.7	1937.48	3223.07	1943.37	0.730161	1.25204e-05	0.000212731	LOC409862	NC_037651.1	8139745	8143947	+	3326	protein_coding	serine/arginine-rich splicing factor 2%2C transcript variant X2	RRM_1
409934	6066.75	5338.12	5954.89	3016.85	3110.39	3890.9	5786.59	3339.38	0.793178	1.25408e-05	0.000212731	LOC409934	NC_037644.1	9563592	9566902	+	1853	protein_coding	vesicle-associated membrane protein-associated protein B	Motile_Sperm
412541	631.335	560.704	502.498	297.212	303.656	342.846	564.845	314.571	0.843573	1.32612e-05	0.000224558	LOC412541	NC_037650.1	10310411	10324192	+	3389	protein_coding	long-chain-fatty-acid--CoA ligase 6%2C transcript variant X2	AMP-binding
408586	214.631	279.807	523.826	94.432	123.677	122.587	339.421	113.566	1.58154	1.37261e-05	0.000231215	LOC408586	NC_037638.1	15929284	16042016	+	11106	protein_coding	probable nuclear hormone receptor HR3%2C transcript variant X13	zf-C4
406099	14072	13429.7	12504.4	8728.5	8806.01	8681.78	13335.4	8738.76	0.60971	1.38769e-05	0.000232945	RpL32	NC_037648.1	10035231	10036482	-	739	protein_coding	ribosomal protein L32%2C transcript variant X1	-
413213	1132.52	957.007	1827.42	511.921	637.769	512.276	1305.65	553.989	1.23732	1.42162e-05	0.000238226	LOC413213	NC_037651.1	2820839	2987483	-	4057	protein_coding	tubulin polyglutamylase TTLL4%2C transcript variant X3	TTL
410012	3132.7	3090.95	2577.33	1729.6	1878.23	1710.24	2933.66	1772.69	0.726438	1.4532e-05	0.000243098	LOC410012	NC_037646.1	11389966	11393140	-	1680	protein_coding	WW domain-binding protein 2%2C transcript variant X2	GRAM
411490	1333.45	1478.52	1714.8	808.139	608.234	899.971	1508.92	772.115	0.967243	1.47164e-05	0.000245756	LOC411490	NC_037646.1	11286632	11321169	+	4672	protein_coding	probable beta-hexosaminidase fdl%2C transcript variant X1	-
551459	1858.61	1683.2	1635.46	994.021	909.121	1145.15	1725.76	1016.1	0.764152	1.53896e-05	0.000256113	LOC551459	NC_037642.1	2945117	2946833	-	1262	protein_coding	protein YIF1B	-
100578380	309.388	265.654	306.276	127.235	148.597	173.416	293.773	149.749	0.972575	1.54324e-05	0.000256385	LOC100578380	NC_037651.1	5480288	5482034	-	1103	protein_coding	tRNA (guanine-N(7)-)-methyltransferase%2C transcript variant X1	-
727164	1894	1974.98	1979.28	1201.77	1289.38	1297.63	1949.42	1262.93	0.626321	1.58743e-05	0.000263274	LOC727164	NC_037651.1	10007492	10008110	-	530	protein_coding	eukaryotic translation initiation factor 3 subunit F-like	-
102656652	1320.89	1428.43	1447.77	875.733	790.981	922.893	1399.03	863.203	0.697045	1.63842e-05	0.00027034	LOC102656652	NC_037641.1	10642046	10643894	+	779	protein_coding	vesicle-associated membrane protein 4-like%2C transcript variant X1	-
408596	2638.36	1903.13	2967.21	1382.68	1102.94	1298.63	2502.9	1261.42	0.988851	1.65731e-05	0.000272591	LOC408596	NC_037638.1	10478893	10482755	-	2011	protein_coding	clavesin-2%2C transcript variant X1	-
412557	432.687	427.877	544.301	251.487	252.893	268.098	468.288	257.492	0.864497	1.65771e-05	0.000272591	LOC412557	NC_037642.1	13877800	13879255	-	1153	protein_coding	diphthine methyl ester synthase	-
412838	582.244	377.794	471.785	144.133	199.361	257.134	477.274	200.209	1.25311	1.6635e-05	0.000272617	LOC412838	NC_037645.1	6752255	6892488	-	6432	protein_coding	alpha-mannosidase 2%2C transcript variant X2	-
726683	2387.2	2419.19	2405.85	1437.35	1639.19	1564.73	2404.08	1547.09	0.63585	1.81131e-05	0.000295837	LOC726683	NC_037642.1	13606302	13622048	+	11440	protein_coding	myosin-VIIa%2C transcript variant X3	Myosin_head
100578984	147.273	168.755	156.977	70.5755	79.375	81.7249	157.669	77.2252	1.02968	1.86118e-05	0.000302959	LOC100578984	NC_037642.1	6291400	6308620	-	5018	protein_coding	protein charlatan%2C transcript variant X2	-
726818	19952.7	21048.7	18101.9	12630	12873.5	12840.8	19701.1	12781.4	0.624191	1.87978e-05	0.00030496	LOC726818	NC_037646.1	8544617	8548705	-	2048	protein_coding	beta-hexosaminidase subunit beta	Glyco_hydro_20
413048	3851.94	6015.31	3586.59	1880.69	2323.1	1247.8	4484.61	1817.2	1.30312	1.96037e-05	0.000316441	LOC413048	NC_037645.1	9844313	9851641	+	2700	protein_coding	bifunctional 3'-phosphoadenosine 5'-phosphosulfate synthase 2%2C transcript variant X2	-
102653748	7055.42	5879.22	4329.67	2396.59	376.57	789.343	5754.77	1187.5	2.27689	1.97478e-05	0.000317893	LOC102653748	NC_037651.1	10507585	10521356	+	3840	protein_coding	growth/differentiation factor 8	TGFb_propeptide
409728	38859.6	39769.7	41534.1	20825.7	27174.9	24409.8	40054.5	24136.8	0.730725	1.97594e-05	0.000317893	LOC409728	NC_037642.1	13723060	13724974	+	1158	protein_coding	40S ribosomal protein S5%2C transcript variant X2	-
100576985	31.9663	46.816	40.9506	9.94021	11.0756	6.97652	39.911	9.33077	2.09478	1.97987e-05	0.000317997	LOC100576985	NC_037648.1	15343862	15348119	-	2319	protein_coding	uncharacterized LOC100576985%2C transcript variant X3	-
410683	4020.91	6074.11	3642.04	2546.68	1373.37	1597.62	4579.02	1839.23	1.31594	1.98354e-05	0.000318057	LOC410683	NC_037638.1	20096647	20100419	-	2229	protein_coding	sodium-coupled monocarboxylate transporter 2%2C transcript variant X2	-
552403	638.185	545.461	537.476	363.812	299.041	286.037	573.707	316.297	0.858609	1.98988e-05	0.000318546	LOC552403	NC_037646.1	7545543	7546451	+	521	protein_coding	mediator of RNA polymerase II transcription subunit 10	-
725057	5642.06	4568.37	5104.32	2504.93	2802.12	3347.73	5104.92	2884.93	0.823346	2.01288e-05	0.000321695	LOC725057	NC_037645.1	4161178	4165155	-	3174	protein_coding	coatomer subunit beta	-
410924	1696.5	1689.73	1981.84	1012.91	1003.26	1184.01	1789.36	1066.73	0.746683	2.0236e-05	0.000322875	LOC410924	NC_037640.1	11643215	11647782	-	3944	protein_coding	serine/threonine-protein phosphatase 6 catalytic subunit	Metallophos
726318	3460.35	3849.8	2449.36	1444.31	1895.77	1316.57	3253.17	1552.22	1.0672	2.03984e-05	0.000323862	LOC726318	NC_037642.1	7326760	7347720	+	2297	protein_coding	UPF0676 protein C1494.01%2C transcript variant X2	2OG-FeII_Oxy
551655	2189.69	2096.92	2181.47	1229.6	1245.08	1492.97	2156.03	1322.55	0.705155	2.08837e-05	0.000330482	LOC551655	NC_037640.1	3224916	3227176	+	1519	protein_coding	casein kinase II subunit beta%2C transcript variant X3	-
551157	7090.82	6684.89	10859.6	3563.57	4068.43	4379.26	8211.76	4003.75	1.03645	2.09704e-05	0.000331312	LOC551157	NC_037638.1	17887712	17890072	-	1330	protein_coding	nascent polypeptide-associated complex subunit alpha%2C transcript variant X2	-
410114	2147.45	2741.46	2673.73	842.93	766.061	1527.86	2520.88	1045.62	1.26978	2.18145e-05	0.000344085	LOC410114	NC_037640.1	4923435	4938899	-	3380	protein_coding	solute carrier family 23 member 1%2C transcript variant X1	-
413423	905.332	1486.14	1458.01	638.162	651.614	586.027	1283.16	625.268	1.03752	2.21729e-05	0.000348602	LOC413423	NC_037641.1	12276599	12303684	-	6983	protein_coding	hemicentin-2%2C transcript variant X3	-
409292	1938.53	2135.03	2434	1013.9	1294.92	1329.52	2169.19	1212.78	0.83904	2.36396e-05	0.000369856	LOC409292	NC_037643.1	7164342	7167535	-	1764	protein_coding	probable isocitrate dehydrogenase [NAD] subunit alpha%2C mitochondrial	-
726671	73.0659	109.963	168.068	42.7429	29.5349	37.8725	117.032	36.7168	1.67871	2.37153e-05	0.000370068	LOC726671	NC_037641.1	2877430	2915217	-	8484	protein_coding	uncharacterized LOC726671%2C transcript variant X1	HMG_box
408869	4284.63	4497.6	4629.97	3039.72	2977.49	2726.82	4470.74	2914.68	0.617233	2.37297e-05	0.000370068	LOC408869	NC_037643.1	17079622	17098244	+	3403	protein_coding	lissencephaly-1 homolog%2C transcript variant X1	WD40
409920	4117.95	4129.61	4745.15	2122.24	2263.11	2915.19	4330.9	2433.51	0.831766	2.41815e-05	0.000375299	LOC409920	NC_037647.1	3194794	3197542	+	1971	protein_coding	ubiquitin-conjugating enzyme E2 variant 2	UQ_con
726009	1175.9	1198.71	1365.87	655.06	701.454	827.215	1246.83	727.91	0.776917	2.46802e-05	0.000382178	LOC726009	NC_037639.1	6926722	6927999	-	869	protein_coding	malignant T-cell-amplified sequence 1 homolog	-
408759	996.664	1108.34	1149.18	526.831	631.308	700.642	1084.73	619.594	0.808219	2.47433e-05	0.000382178	LOC408759	NC_037640.1	3058514	3115462	+	3496	protein_coding	protein FAM102B%2C transcript variant X1	-
102654594	905.332	553.082	855.696	355.86	404.259	369.755	771.37	376.625	1.03439	2.64213e-05	0.000406148	LOC102654594	NC_037644.1	2199633	2201084	+	1452	protein_coding	WD repeat-containing protein 18	-
410664	641.61	526.952	800.242	320.075	371.955	318.926	656.268	336.985	0.962366	2.65138e-05	0.000406924	LOC410664	NC_037638.1	113471	117037	-	2589	protein_coding	protein arginine N-methyltransferase 5%2C transcript variant X3	-
410675	1634.85	1426.26	1738.69	724.642	675.611	1041.49	1599.93	813.915	0.975404	2.67307e-05	0.000409303	LOC410675	NC_037638.1	21494762	21496834	+	1262	protein_coding	maternal B9.10 protein	-
411191	353.913	284.162	425.715	142.145	185.516	184.379	354.597	170.68	1.05599	2.69227e-05	0.00041124	LOC411191	NC_037644.1	13771866	13772968	+	763	protein_coding	DNA-directed RNA polymerase III subunit RPC8	-
100578957	31.9663	34.8398	50.3351	9.94021	7.38372	9.96645	39.0471	9.0968	2.11185	2.70067e-05	0.000411874	LOC100578957	NC_037650.1	5828375	5898797	+	2052	protein_coding	uncharacterized LOC100578957%2C transcript variant X2	-
552378	2471.68	2568.35	2718.95	1488.05	1591.19	1780.01	2586.33	1619.75	0.675301	2.70834e-05	0.000412393	2021-03-06	NC_037651.1	10437050	10441484	+	3600	protein_coding	membrane-associated ring finger (C3HC4) 6	-
409489	649.601	679.377	811.333	383.692	381.185	451.48	713.437	405.452	0.81638	2.78748e-05	0.000421789	LOC409489	NC_037639.1	1912294	1913551	+	980	protein_coding	diphosphoinositol polyphosphate phosphohydrolase 1	NUDIX
552067	888.207	938.498	936.744	560.628	599.928	599.98	921.15	586.845	0.650564	2.7875e-05	0.000421789	LOC552067	NC_037638.1	11158883	11159963	+	754	protein_coding	uncharacterized LOC552067	-
100192200	963724	717060	96327.7	19318.8	97.8343	93.6846	592371	6503.44	6.50912	2.81175e-05	0.000424131	Fibroin2	NC_037649.1	3899624	3900553	+	930	protein_coding	silk fibroin 2	-
410200	761.484	694.619	1005	408.543	483.634	367.762	820.366	419.98	0.966503	2.82506e-05	0.000425475	LOC410200	NC_037647.1	10036100	10037678	+	1308	protein_coding	mRNA turnover protein 4 homolog	-
724885	1718.19	1065.88	823.277	565.598	505.785	382.712	1202.45	484.698	1.31021	2.88133e-05	0.000433275	LOC724885	NC_037640.1	9937322	10035651	+	5352	protein_coding	zinc finger protein 395%2C transcript variant X2	-
727599	1002.37	1352.22	1600.48	616.293	654.383	744.494	1318.36	671.723	0.973437	2.91907e-05	0.000438269	LOC727599	NC_037646.1	1647665	1648662	+	824	protein_coding	NADH dehydrogenase [ubiquinone] iron-sulfur protein 4%2C mitochondrial	-
113218576	803.725	1294.52	1189.27	414.507	585.16	555.131	1095.84	518.266	1.08041	3.01572e-05	0.00045068	LOC113218576	NC_037650.1	4865197	4866061	-	865	protein_coding	lysozyme-like	-
726220	565.119	584.656	619.377	339.955	324.884	388.692	589.717	351.177	0.748656	3.06974e-05	0.000457339	LOC726220	NC_037638.1	14358547	14359333	-	712	protein_coding	pyroglutamyl-peptidase 1	-
551572	212.348	224.281	133.089	85.4858	84.9128	64.7819	189.906	78.3935	1.27285	3.13479e-05	0.000465596	LOC551572	NC_037645.1	8797456	8802757	+	1789	protein_coding	uncharacterized LOC551572%2C transcript variant X1	-
724368	7736.99	6848.2	8794.99	4775.28	4967.4	4589.55	7793.39	4777.41	0.7061	3.20323e-05	0.000473579	LOC724368	NC_037641.1	9927392	9932492	-	2805	protein_coding	dnaJ homolog subfamily A member 1%2C transcript variant X1	DnaJ_C
408308	40321	60075.8	50650.7	19910.2	25484.9	30057.8	50349.2	25151	1.00135	3.23388e-05	0.00047738	LOC408308	NC_037648.1	13528083	13529173	-	817	protein_coding	coiled-coil-helix-coiled-coil-helix domain-containing protein 10%2C mitochondrial	-
409148	82694.6	86452.9	84766	26016.5	37806.5	52670.7	84637.8	38831.2	1.12408	3.33263e-05	0.000491208	ATP5G2	NC_037645.1	2241316	2244128	+	1457	protein_coding	ATP synthase%2C H+ transporting%2C mitochondrial Fo complex%2C subunit C2 (subunit 9)%2C transcript variant 1	-
550981	1487.58	1539.48	1510.91	792.235	809.441	1047.47	1512.66	883.05	0.77666	3.46098e-05	0.000506267	LOC550981	NC_037651.1	1515069	1516590	+	853	protein_coding	coatomer subunit zeta-1%2C transcript variant X3	-
726028	373.321	330.978	427.422	175.942	227.972	197.336	377.24	200.417	0.913032	3.47341e-05	0.000507317	LOC726028	NC_037645.1	10544803	10546002	+	1071	protein_coding	probable rRNA-processing protein EBP2 homolog%2C transcript variant X1	-
100577981	1201.02	1655.98	1371.84	780.307	864.819	675.725	1409.62	773.617	0.865455	3.47933e-05	0.000507415	LOC100577981	NC_037647.1	10763639	10767130	-	2820	protein_coding	insulin-like growth factor-binding protein complex acid labile subunit	-
408526	62180.2	60601.7	60048.9	28077.1	40114.8	36882.8	60943.6	35024.9	0.799085	3.48643e-05	0.000507685	LOC408526	NC_037652.1	6470416	6473217	+	1447	protein_coding	60S ribosomal protein L4	-
551107	21361.5	20490.2	19155.5	11951.1	14267.2	12536.8	20335.7	12918.4	0.654554	3.49334e-05	0.000507927	LOC551107	NC_037638.1	11561370	11562889	+	656	protein_coding	60S ribosomal protein L9	-
724771	908311	720364	94635.1	19921.2	23.0741	144.514	574436	6696.26	6.42261	3.53168e-05	0.000512046	Fibroin1	NC_037649.1	3896979	3897980	+	1002	protein_coding	silk fibroin 1	-
552572	11960	10698	13442	4690.79	6094.34	7674.17	12033.3	6153.1	0.967682	3.55936e-05	0.000514745	LOC552572	NC_037642.1	508241	512059	+	1334	protein_coding	eukaryotic translation initiation factor 5A%2C transcript variant X2	-
551678	3696.68	4503.05	4063.49	2623.22	2347.1	2651.08	4087.74	2540.47	0.686283	3.56235e-05	0.000514745	LOC551678	NC_037638.1	1051195	1053152	-	1411	protein_coding	receptor expression-enhancing protein 5%2C transcript variant X2	TB2_DP1_HVA22
724486	810.575	865.552	1102.25	468.184	449.484	576.061	926.126	497.91	0.89633	3.56686e-05	0.000514745	LOC724486	NC_037647.1	5690526	5692098	+	847	protein_coding	probable N-acetyltransferase san	Acetyltransf_1
551114	872.224	1083.3	973.429	466.196	640.538	482.376	976.318	529.703	0.881828	3.61128e-05	0.00052038	LOC551114	NC_037648.1	7239903	7290654	-	1594	protein_coding	methyltransferase-like protein 9%2C transcript variant X1	-
409796	5527.89	4908.06	5499.32	2620.24	3403.9	3387.6	5311.76	3137.24	0.759677	3.69917e-05	0.000530671	LOC409796	NC_037642.1	340013	343856	-	915	protein_coding	eukaryotic translation initiation factor 3 subunit J	-
550794	2897.52	2928.72	3136.13	2060.61	1967.76	1897.61	2987.46	1975.33	0.596972	3.76466e-05	0.000539267	LOC550794	NC_037648.1	10062836	10064818	+	1568	protein_coding	26S protease regulatory subunit 8%2C transcript variant X4	AAA
552424	1361.99	1442.59	1562.09	516.891	608.234	939.836	1455.56	688.321	1.08069	3.77371e-05	0.000539763	LOC552424	NC_037651.1	5026809	5027738	+	695	protein_coding	NADH dehydrogenase [ubiquinone] 1 beta subcomplex subunit 10	-
413398	667.868	678.288	757.585	383.692	385.8	467.427	701.247	412.306	0.767034	3.8404e-05	0.000546876	LOC413398	NC_037649.1	2821954	2823285	-	720	protein_coding	39S ribosomal protein L32%2C mitochondrial	-
413466	81.0575	68.5909	88.7262	35.7848	24.9201	30.896	79.4582	30.5336	1.38435	3.88639e-05	0.00055099	LOC413466	NC_037651.1	6666177	6752101	-	6820	protein_coding	zinc finger protein 423%2C transcript variant X1	-
409961	3460.35	3448.05	4741.73	2248.48	2034.22	2287.3	3883.38	2190	0.826669	4.0115e-05	0.000567064	LOC409961	NC_037650.1	4880126	4913771	+	3152	protein_coding	heterogeneous nuclear ribonucleoprotein 27C%2C transcript variant X3	-
725932	4019.77	6635.9	5278.36	2787.24	2882.42	2696.92	5311.34	2788.86	0.929417	4.0516e-05	0.000571064	Cpap3-c	NC_037640.1	12258005	12264713	+	1386	protein_coding	cuticular protein analogous to peritrophins 3-C%2C transcript variant X1	CBM_14
724516	867.657	890.593	1006.7	426.435	468.866	612.937	921.651	502.746	0.874946	4.06344e-05	0.000571898	LOC724516	NC_037643.1	12112866	12118277	-	1324	protein_coding	39S ribosomal protein L50%2C mitochondrial	-
412158	683.851	782.807	695.306	453.274	457.791	425.567	720.655	445.544	0.693447	4.14173e-05	0.000581351	LOC412158	NC_037641.1	10258952	10267808	+	2069	protein_coding	BTB/POZ domain-containing protein 17%2C transcript variant X1	BTB
100578797	367.613	123.028	153.565	46.719	46.1483	80.7283	214.735	57.8652	1.891	4.14977e-05	0.000581351	LOC100578797	NC_037647.1	10065957	10068754	+	1929	protein_coding	uncharacterized LOC100578797	-
724540	887.066	721.838	783.18	432.399	522.398	418.591	797.361	457.796	0.799914	4.15112e-05	0.000581351	LOC724540	NC_037638.1	18566265	18568576	-	1313	protein_coding	probable galactose-1-phosphate uridylyltransferase	-
551347	565.119	425.699	247.41	197.81	103.372	78.735	412.743	126.639	1.70379	4.15465e-05	0.000581351	LOC551347	NC_037640.1	11847613	11849719	+	1096	protein_coding	UPF0605 protein CG18335	-
551442	2774.22	2111.08	2581.59	1264.4	1339.22	1621.54	2488.96	1408.39	0.821565	4.17372e-05	0.000582334	LOC551442	NC_037640.1	639948	645242	+	1655	protein_coding	iron-sulfur protein NUBPL	-
411520	4567.76	4785.03	4132.59	2672.92	2922.11	3035.78	4495.13	2876.94	0.643699	4.20848e-05	0.000585579	LOC411520	NC_037651.1	8225352	8226751	+	886	protein_coding	proteasome subunit beta type-4	Proteasome
412813	1647.41	2780.65	1891.4	408.543	401.49	1125.21	2106.49	645.082	1.70743	4.2091e-05	0.000585579	LOC412813	NC_037638.1	9939689	10184432	+	6994	protein_coding	zwei Ig domain protein zig-8%2C transcript variant X3	-
409549	2988.85	3235.75	3101.15	1622.24	1847.78	2149.76	3108.58	1873.26	0.73073	4.29136e-05	0.000594459	LOC409549	NC_037651.1	9045117	9046329	-	889	protein_coding	succinate dehydrogenase cytochrome b560 subunit%2C mitochondrial	-
552568	1526.39	1515.53	1487.02	883.685	913.736	1058.44	1509.65	951.953	0.665263	4.30838e-05	0.000595962	LOC552568	NC_037644.1	12430413	12443689	+	4344	protein_coding	hydroxyacylglutathione hydrolase%2C mitochondrial%2C transcript variant X1	Lactamase_B
409723	1520.68	1690.82	1855.57	738.558	950.654	1082.36	1689.03	923.856	0.870675	4.40031e-05	0.000607511	LOC409723	NC_037647.1	3564201	3568907	+	787	protein_coding	40S ribosomal protein S12%2C mitochondrial	Ribosomal_S12
408661	586.81	708.773	914.563	289.26	438.409	304.973	736.715	344.214	1.09814	4.40481e-05	0.000607511	LOC408661	NC_037639.1	14966833	15039135	-	9475	protein_coding	uncharacterized LOC408661%2C transcript variant X1	-
409420	756.917	891.682	692.747	471.166	446.715	467.427	780.449	461.769	0.756594	4.41072e-05	0.000607511	LOC409420	NC_037646.1	12338624	12340264	-	1434	protein_coding	cytochrome c oxidase assembly protein COX11%2C mitochondrial%2C transcript variant X2	-
551383	458.945	334.245	445.337	228.625	230.741	180.393	412.842	213.253	0.953066	4.43123e-05	0.000608741	LOC551383	NC_037638.1	5031404	5033046	-	1184	protein_coding	protein MAK16 homolog A	-
552835	759.2	725.104	678.244	410.531	426.41	482.376	720.849	439.772	0.712538	4.43224e-05	0.000608741	LOC552835	NC_037648.1	15244173	15245244	+	726	protein_coding	glutaredoxin-related protein 5%2C mitochondrial%2C transcript variant X2	-
100192201	985941	735522	115173	22652.8	63.6846	94.6813	612212	7603.71	6.33115	4.54057e-05	0.000622735	Fibroin3	NC_037649.1	3902030	3903037	+	1008	protein_coding	silk fibroin 3	-
413553	649.601	1457.83	508.47	254.469	328.576	296.004	871.967	293.016	1.57272	4.56407e-05	0.000625071	LOC413553	NC_037649.1	3102442	3116747	-	1972	protein_coding	zinc transporter ZIP1-like%2C transcript variant X2	-
726814	1487.58	1303.23	1157.71	834.978	754.986	787.35	1316.17	792.438	0.731502	4.6895e-05	0.000640435	LOC726814	NC_037648.1	15472823	15479193	+	1931	protein_coding	solute carrier family 2%2C facilitated glucose transporter member 1%2C transcript variant X1	Sugar_tr
725168	17483.3	16866.8	17607.9	9974.01	10899.3	12319.5	17319.3	11064.3	0.646483	4.72169e-05	0.000643921	Rps14	NC_037641.1	5135231	5136489	+	613	protein_coding	ribosomal protein S14%2C transcript variant X1	-
410570	465.795	451.829	431.687	295.224	257.507	241.188	449.77	264.64	0.764782	4.77238e-05	0.000649918	LOC410570	NC_037651.1	10427732	10431291	-	3270	protein_coding	85/88 kDa calcium-independent phospholipase A2%2C transcript variant X1	-
410337	7289.46	4189.49	5051.42	2516.86	1604.11	2924.16	5510.13	2348.38	1.23044	4.78039e-05	0.000650093	LOC410337	NC_037648.1	12873467	12883885	-	4230	protein_coding	venom dipeptidylpeptidase IV	-
551258	2676.04	2433.34	2790.61	1405.55	1751.79	1677.35	2633.33	1611.56	0.708457	4.81232e-05	0.000653516	LOC551258	NC_037642.1	8400485	8424389	+	3936	protein_coding	serine/threonine-protein phosphatase 2A 56 kDa regulatory subunit epsilon isoform	-
551580	463.512	439.853	443.631	155.067	225.204	274.077	448.999	218.116	1.04143	4.90186e-05	0.000663811	LOC551580	NC_037638.1	9273	12174	-	1447	protein_coding	ubiquitin-related modifier 1%2C transcript variant X1	-
413474	1296.92	1379.44	1357.34	794.223	898.968	900.967	1344.57	864.72	0.636836	5.09275e-05	0.000688697	LOC413474	NC_037643.1	16637239	16654818	-	5068	protein_coding	nuclear hormone receptor FTZ-F1 beta%2C transcript variant X1	-
408426	935.015	1154.07	1013.53	599.395	398.721	607.954	1034.2	535.357	0.950367	5.13788e-05	0.000693829	LOC408426	NC_037650.1	5953969	5955496	+	1301	protein_coding	lysosomal thioesterase PPT2 homolog%2C transcript variant X1	-
412442	458.945	362.552	564.777	229.619	229.818	255.141	462.091	238.193	0.957577	5.19233e-05	0.000699535	LOC412442	NC_037642.1	1001239	1003036	+	1090	protein_coding	retinol dehydrogenase 13	adh_short
411871	156.407	138.271	236.319	48.707	74.7602	82.7215	176.999	68.7296	1.36724	5.1946e-05	0.000699535	LOC411871	NC_037639.1	9472913	9503365	-	8491	protein_coding	dual specificity tyrosine-phosphorylation-regulated kinase 2-like	-
411142	1110.83	922.167	1144.06	603.371	652.537	669.746	1059.02	641.884	0.722635	5.26866e-05	0.000708122	LOC411142	NC_037643.1	15415898	15418459	-	2175	protein_coding	solute carrier family 25 member 46	Mito_carr
551867	15252.5	15191.3	14159.5	8221.55	9638.53	10273.4	14867.8	9377.83	0.664835	5.27301e-05	0.000708122	LOC551867	NC_037642.1	242086	243550	+	591	protein_coding	40S ribosomal protein S13	-
411353	3116.72	1623.32	556.245	615.299	316.577	251.155	1765.43	394.344	2.1623	5.31422e-05	0.000712665	LOC411353	NC_037645.1	8577142	8579600	-	1405	protein_coding	lipase 3	-
411206	5813.3	5659.29	5263	3190.81	3537.73	3902.86	5578.53	3543.8	0.654521	5.50245e-05	0.000735867	LOC411206	NC_037641.1	10545216	10546506	-	944	protein_coding	proteasome subunit beta type-5	Proteasome
410567	1238.7	1352.22	1487.02	806.151	891.585	861.101	1359.31	852.946	0.672739	5.54307e-05	0.000740275	LOC410567	NC_037651.1	10368093	10384211	+	3702	protein_coding	zinc transporter ZIP11%2C transcript variant X2	-
552118	1194.17	1057.17	1266.05	739.552	701.454	764.427	1172.47	735.144	0.673923	5.5861e-05	0.000741135	LOC552118	NC_037638.1	11125422	11130015	-	1254	protein_coding	pyrimidodiazepine synthase%2C transcript variant X1	-
410509	2581.28	3561.28	1115.9	424.447	718.067	1013.59	2419.49	718.701	1.75105	5.58734e-05	0.000741135	LOC410509	NC_037651.1	7693270	7711431	+	9792	protein_coding	mucin-2%2C transcript variant X1	CBM_14
100576187	1141.65	1113.79	1222.55	739.552	686.686	790.34	1159.33	738.859	0.650403	5.59473e-05	0.000741135	LOC100576187	NC_037646.1	819050	887778	+	2368	protein_coding	E3 ubiquitin-protein ligase AMFR	CUE
726289	872.224	695.708	1047.65	495.023	328.576	211.289	871.861	344.962	1.33803	5.59549e-05	0.000741135	LOC726289	NC_037646.1	11100448	11105614	+	5167	protein_coding	transcription factor AP-1	-
410120	2383.77	1831.27	1983.54	888.655	1176.78	1286.67	2066.2	1117.37	0.886713	5.72109e-05	0.000754668	LOC410120	NC_037651.1	8115629	8116817	+	1042	protein_coding	thioredoxin%2C mitochondrial	-
100192202	973098	732584	95215.2	22707.4	35.9957	46.8423	600299	7596.75	6.30412	5.73282e-05	0.000755185	Fibroin4	NC_037649.1	3904832	3905860	+	1029	protein_coding	silk fibroin 4	-
408441	2454.56	1854.13	2364.04	1165.99	1346.61	1383.34	2224.24	1298.65	0.776349	6.00801e-05	0.000787634	LOC408441	NC_037651.1	10598573	10600839	-	1416	protein_coding	adenosine kinase 1%2C transcript variant X2	PfkB
724750	2259.33	2365.84	2171.23	1397.59	1332.76	1598.62	2265.47	1442.99	0.650738	6.01667e-05	0.000787634	LOC724750	NC_037645.1	4209783	4286564	-	1257	protein_coding	ER membrane protein complex subunit 10%2C transcript variant X3	-
113219382	270.572	150.247	206.459	92.444	75.6832	32.8893	209.093	67.0055	1.64082	6.01987e-05	0.000787634	LOC113219382	NW_020555904.1	72	1994	-	1923	rRNA	small subunit ribosomal RNA	-
100577513	577.677	1088.74	487.994	345.919	247.355	233.215	718.139	275.496	1.38185	6.09498e-05	0.000795309	LOC100577513	NC_037640.1	12231013	12233568	+	1696	protein_coding	uncharacterized LOC100577513%2C transcript variant X1	CBM_14
100578769	2472.82	1733.28	2476.66	1275.33	1097.41	1305.61	2227.59	1226.11	0.861612	6.12449e-05	0.000798081	LOC100578769	NC_037647.1	10056929	10060658	+	2998	protein_coding	uncharacterized LOC100578769	BESS
408276	2586.99	2114.34	3425.34	1221.65	1312.46	1608.59	2708.89	1380.9	0.9724	6.16078e-05	0.000798506	LOC408276	NC_037647.1	11298457	11304861	-	4160	protein_coding	ATP-dependent RNA helicase bel	DEAD
410399	61.6493	123.028	150.152	32.8027	44.3023	22.9228	111.61	33.3426	1.74421	6.18675e-05	0.000800799	LOC410399	NC_037650.1	10465212	10467520	+	874	protein_coding	protein bowel	-
409927	2421.45	2143.74	2030.47	997.997	1314.3	1417.23	2198.55	1243.18	0.822306	6.3997e-05	0.000826151	LOC409927	NC_037638.1	9251940	9256101	-	3131	protein_coding	putative pyridoxal-dependent decarboxylase domain-containing protein 2%2C transcript variant X2	-
411154	7607.99	6378.96	7022.17	3823.01	4603.75	4596.53	7003.04	4341.1	0.689887	6.45709e-05	0.000832202	LOC411154	NC_037643.1	12958671	12969785	+	4097	protein_coding	eukaryotic translation initiation factor 4 gamma 2%2C transcript variant X1	-
552372	1274.09	1334.8	1219.99	861.817	705.146	822.232	1276.29	796.398	0.680443	6.46378e-05	0.000832202	LOC552372	NC_037638.1	25066388	25067744	-	770	protein_coding	ER membrane protein complex subunit 8/9 homolog	-
409508	385.879	325.535	372.821	145.127	203.975	214.279	361.412	187.794	0.944272	6.52171e-05	0.000838543	LOC409508	NC_037652.1	1848897	1851670	-	1503	protein_coding	S-adenosylmethionine mitochondrial carrier protein%2C transcript variant X3	Mito_carr
novel.362	202.073	211.216	210.725	109.342	126.446	103.651	208.005	113.147	0.877747	6.53544e-05	0.000839192	-	NC_037648.1	14230006	14239146	+	8829	-	-	-
408561	1368.84	1750.7	1469.1	992.033	650.691	555.131	1529.55	732.618	1.06204	6.63314e-05	0.000850608	LOC408561	NC_037653.1	5874617	5890453	-	2511	protein_coding	proteoglycan 4%2C transcript variant X1	-
408444	2346.1	1432.79	1593.66	801.181	1025.41	873.061	1790.85	899.886	0.992455	6.68536e-05	0.000855037	LOC408444	NC_037651.1	4526896	4599343	+	14475	protein_coding	unconventional myosin-XV%2C transcript variant X3	-
408888	744.359	955.918	649.237	397.609	435.64	453.474	783.171	428.907	0.867941	6.83237e-05	0.000872215	LOC408888	NC_037643.1	8485219	8498067	+	3654	protein_coding	leucine-rich repeats and immunoglobulin-like domains protein 1	-
551275	6550.81	5932.57	7742.22	3352.83	3847.84	4453.01	6741.87	3884.56	0.795491	6.83772e-05	0.000872215	LOC551275	NC_037651.1	5408519	5411429	+	1898	protein_coding	T-complex protein 1 subunit delta	-
410486	35494	38686.4	41731.2	21269.1	27014.3	23246.7	38637.2	23843.4	0.696407	6.97985e-05	0.000886835	LOC410486	NC_037651.1	5111502	5113767	-	1154	protein_coding	40S ribosomal protein SA	-
409201	1382.54	1335.89	1432.42	809.133	797.442	977.709	1383.62	861.428	0.683926	7.08465e-05	0.000898537	LOC409201	NC_037647.1	9402253	9403954	-	898	protein_coding	acyl-protein thioesterase 1	Abhydrolase_2
725659	893.915	752.323	997.317	424.447	494.71	561.111	881.185	493.423	0.837151	7.11776e-05	0.000899589	LOC725659	NC_037652.1	3038290	3039526	+	735	protein_coding	39S ribosomal protein L35%2C mitochondrial	-
409793	1739.88	1534.04	1812.06	780.307	914.659	1147.14	1695.33	947.368	0.839746	7.12165e-05	0.000899589	LOC409793	NC_037639.1	1902578	1904922	+	1093	protein_coding	NADH dehydrogenase [ubiquinone] flavoprotein 2%2C mitochondrial	-
724413	356.196	332.067	408.653	199.798	167.057	228.232	365.639	198.362	0.884159	7.15353e-05	0.000901793	LOC724413	NC_037638.1	19352806	19353792	+	831	protein_coding	uncharacterized LOC724413	-
551687	20856.9	19652.9	12873	9878.58	7631.08	4572.61	17794.3	7360.76	1.27346	7.30419e-05	0.000916008	LOC551687	NC_037639.1	16023021	16035629	+	4355	protein_coding	uncharacterized LOC551687	-
107965288	1392.82	1699.53	1298.47	755.456	853.743	941.83	1463.61	850.343	0.783128	7.3308e-05	0.000918154	LOC107965288	NC_037648.1	6397598	6402098	+	418	protein_coding	probable protein BRICK1-B	-
408315	1094.85	1051.73	1045.09	493.035	735.604	518.255	1063.89	582.298	0.868994	7.41845e-05	0.000925535	LOC408315	NC_037648.1	14062937	14084011	+	5564	protein_coding	ceramide kinase%2C transcript variant X3	-
725038	10725.8	10382.3	11837.3	7439.26	6690.58	7514.7	10981.8	7214.85	0.606145	7.54252e-05	0.000939802	LOC725038	NC_037642.1	11731150	11734070	-	897	protein_coding	NPC intracellular cholesterol transporter 2 homolog a	-
411156	383.596	304.849	452.162	211.727	199.361	198.332	380.202	203.14	0.905901	7.58039e-05	0.000942092	LOC411156	NC_037643.1	11871267	11874322	-	2118	protein_coding	putative elongator complex protein 4%2C transcript variant X2	-
552546	270.572	178.554	330.164	128.229	84.9128	116.607	259.763	109.916	1.24343	7.61615e-05	0.000944109	LOC552546	NC_037646.1	11353870	11366444	+	3252	protein_coding	protocadherin Fat 4%2C transcript variant X1	-
551624	1191.89	984.225	1494.7	604.365	561.163	757.45	1223.6	640.993	0.933451	8.31367e-05	0.00102663	LOC551624	NC_037648.1	16246262	16263354	-	4015	protein_coding	TOX high mobility group box family member 3%2C transcript variant X1	HMG_box
100578774	740.934	1017.98	770.383	417.489	499.324	280.057	843.098	398.957	1.07891	8.33097e-05	0.00102745	LOC100578774	NC_037646.1	9722542	9735421	+	4370	protein_coding	centrosomal protein of 164 kDa	WW
725569	1326.6	1406.66	1200.36	818.08	881.432	833.195	1311.21	844.236	0.634677	8.42788e-05	0.00103705	LOC725569	NC_037642.1	10906728	10908648	+	1344	protein_coding	UDP-xylose and UDP-N-acetylglucosamine transporter	-
100577578	2465.97	2176.4	2926.26	1510.91	1594.88	1489.98	2522.88	1531.93	0.719992	8.43023e-05	0.00103705	LOC100577578	NC_037648.1	6455573	6462167	-	4641	protein_coding	uncharacterized LOC100577578%2C transcript variant X2	Pro_isomerase
408402	3775.45	3340.27	2795.73	1357.83	1205.39	2159.73	3303.82	1574.32	1.06939	8.46669e-05	0.00104021	LOC408402	NC_037650.1	2884583	2888264	+	3143	protein_coding	acetyl-coenzyme A transporter 1%2C transcript variant X2	-
725416	432.687	470.338	580.133	303.177	235.356	276.071	494.386	271.534	0.866326	8.48806e-05	0.00104151	LOC725416	NC_037644.1	7508501	7509311	-	811	protein_coding	U1 small nuclear ribonucleoprotein C	-
552768	977.256	738.169	755.879	474.148	483.634	494.336	823.768	484.039	0.766486	8.65516e-05	0.00105933	LOC552768	NC_037645.1	1532181	1536443	-	2340	protein_coding	phenylalanine--tRNA ligase alpha subunit%2C transcript variant X4	tRNA-synt_2d
410434	674.718	884.061	1168.8	468.184	482.711	439.521	909.192	463.472	0.973009	8.69938e-05	0.00106205	LOC410434	NC_037650.1	4512211	4514118	+	1475	protein_coding	splicing factor 3B subunit 4	RRM_1
409129	984.106	901.481	839.487	509.933	549.164	615.927	908.358	558.341	0.701646	8.73993e-05	0.00106565	LOC409129	NC_037641.1	8888156	8889357	-	824	protein_coding	28S ribosomal protein S10%2C mitochondrial	Ribosomal_S10
410405	1008.08	994.024	1766.85	697.803	476.25	378.725	1256.32	517.593	1.2799	8.93114e-05	0.00108549	LOC410405	NC_037650.1	2519228	2524033	+	4067	protein_coding	cytochrome P450 18a1	-
408367	10100.2	8288.61	9950.13	4716.63	4956.32	6544.97	9446.32	5405.97	0.805231	9.02558e-05	0.00109496	LOC408367	NC_037648.1	13043496	13045727	+	1618	protein_coding	NADH dehydrogenase [ubiquinone] flavoprotein 1%2C mitochondrial	-
552200	1750.16	1590.66	1854.72	1068.57	1053.1	1200.96	1731.84	1107.54	0.645257	9.14606e-05	0.00110542	LOC552200	NC_037640.1	660587	662933	+	1531	protein_coding	probable histone-binding protein Caf1%2C transcript variant X1	WD40
410030	4162.47	4020.73	3706.88	1581.49	1791.48	2718.85	3963.36	2030.6	0.964816	9.20385e-05	0.00111096	LOC410030	NC_037642.1	7077206	7078932	-	1452	protein_coding	protein SEC13 homolog%2C transcript variant X2	-
724118	195.223	215.571	249.116	96.4201	109.833	132.554	219.97	112.936	0.963984	9.21489e-05	0.00111096	LOC724118	NC_037638.1	25166839	25168557	+	1127	protein_coding	mitochondrial fission regulator 2	-
102654184	227064	130270	20291.9	5589.38	58.1468	93.6846	125875	1913.74	6.03943	9.29862e-05	0.00111687	LOC102654184	NC_037649.1	3893685	3895626	+	1942	protein_coding	plectin	-
102654533	55.9411	65.3247	103.23	20.8744	29.5349	25.9128	74.8318	25.4407	1.56125	9.40607e-05	0.0011266	LOC102654533	NC_037641.1	2979556	3128993	-	2880	protein_coding	protein pangolin%2C isoforms A/H/I/S	-
100576497	899.624	1143.18	588.664	484.088	355.342	287.034	877.157	375.488	1.22351	9.42814e-05	0.0011266	LOC100576497	NC_037644.1	12483683	12490060	-	2550	protein_coding	uncharacterized LOC100576497%2C transcript variant X2	-
412349	603.935	752.323	716.635	396.615	431.948	432.544	690.964	420.369	0.717316	9.43786e-05	0.0011266	LOC412349	NC_037653.1	5266021	5267111	-	704	protein_coding	ER membrane protein complex subunit 4	-
novel.42	46.8078	14.1537	23.0347	0.994021	3.69186	4.98323	27.9987	3.22304	3.11252	9.70928e-05	0.0011572	-	NC_037638.1	26291662	26346393	+	1255	-	-	-
413605	5354.36	5555.86	5520.65	1875.72	2767.05	3560.02	5476.96	2734.26	1.00223	9.71812e-05	0.0011572	LOC413605	NC_037647.1	3197900	3200770	-	1339	protein_coding	cytochrome c1%2C heme protein%2C mitochondrial%2C transcript variant X2	-
409189	7090.82	7273.9	6192.07	3559.59	4193.96	4715.13	6852.26	4156.22	0.721235	9.73173e-05	0.00115739	LOC409189	NC_037638.1	24668816	24671006	+	1585	protein_coding	growth hormone-inducible transmembrane protein%2C transcript variant X1	-
102655449	31.9663	30.4849	46.9225	8.94619	8.30669	10.9631	36.4579	9.40533	1.96352	9.75749e-05	0.00115903	LOC102655449	NC_037650.1	8280063	8577527	-	4100	protein_coding	uncharacterized LOC102655449%2C transcript variant X2	-
725315	1448.76	1537.31	1462.28	769.373	813.133	1053.45	1482.78	878.653	0.755032	9.96256e-05	0.00117904	LOC725315	NC_037653.1	1479117	1480312	+	719	protein_coding	uncharacterized LOC725315%2C transcript variant X2	-
409802	3829.11	3479.63	3400.6	2499.96	2096.05	2327.17	3569.78	2307.73	0.629326	0.000100881	0.00118974	LOC409802	NC_037644.1	3030597	3031897	+	860	protein_coding	proteasome subunit alpha type-2	Proteasome
551397	740.934	731.636	784.033	358.842	443.023	507.292	752.201	436.386	0.785727	0.00010179	0.00119733	LOC551397	NC_037642.1	6871552	6872349	-	549	protein_coding	28S ribosomal protein S18a%2C mitochondrial	-
408891	436.112	402.836	450.456	282.302	258.43	247.168	429.801	262.633	0.711199	0.000104464	0.00122523	LOC408891	NC_037643.1	8132236	8134544	-	1048	protein_coding	methyl-CpG-binding domain protein 2%2C transcript variant X4	-
409410	14338	11132.4	18079.7	6496.92	8032.57	8454.54	14516.7	7661.34	0.922087	0.000104993	0.00122903	LOC409410	NC_037644.1	1395887	1400109	-	3060	protein_coding	plasminogen activator inhibitor 1 RNA-binding protein%2C transcript variant X2	-
100578446	464.653	469.249	482.022	312.123	256.584	296.004	471.975	288.237	0.712235	0.000106843	0.00124917	LOC100578446	NC_037641.1	8070547	8101998	-	3840	protein_coding	pituitary homeobox x%2C transcript variant X3	-
406092	2668.05	2701.18	3223.15	1610.31	1064.18	1786.98	2864.12	1487.16	0.94582	0.000107719	0.00125749	For	NC_037650.1	10107902	10187775	-	6245	protein_coding	cGMP-dependent protein kinase foraging%2C transcript variant X1	Pkinase
724352	341.355	346.221	334.43	209.739	202.129	215.275	340.668	209.048	0.704488	0.000107815	0.00125749	LOC724352	NC_037643.1	15557243	15558117	-	591	protein_coding	zinc finger protein 593 homolog	-
102656661	759.2	696.797	1284.82	354.866	227.05	488.356	913.607	356.757	1.35766	0.00010939	0.00127279	LOC102656661	NC_037643.1	13690589	14052771	+	8048	protein_coding	uncharacterized LOC102656661%2C transcript variant X1	-
551072	960.131	1070.24	1013.53	651.084	694.07	570.081	1014.63	638.412	0.668229	0.000111566	0.00129499	LOC551072	NC_037647.1	7738728	7740474	+	1433	protein_coding	carbonyl reductase [NADPH] 1-like	adh_short
550667	4052.87	4601.04	5924.18	1538.75	2181.89	3009.87	4859.36	2243.5	1.11512	0.000111869	0.00129696	LOC550667	NC_037640.1	11700204	11708701	+	4534	protein_coding	succinate dehydrogenase [ubiquinone] flavoprotein subunit%2C mitochondrial%2C transcript variant X1	-
102654608	1028.63	700.063	225.228	109.342	20.3052	20.9295	651.307	50.1924	3.69816	0.000113557	0.00131495	LOC102654608	NC_037650.1	6603913	6610770	-	1024	protein_coding	homeobox protein ceh-19	Homeobox
100577397	1653.12	2129.58	2399.87	1272.35	945.117	1177.04	2060.86	1131.5	0.865463	0.000115851	0.00133352	LOC100577397	NC_037641.1	12930267	12979431	-	4999	protein_coding	trichohyalin	-
552795	1372.27	1515.53	1460.57	864.799	862.05	1034.52	1449.46	920.455	0.655287	0.000119705	0.00137298	LOC552795	NC_037652.1	2676722	2687337	-	2131	protein_coding	cholinephosphotransferase 1%2C transcript variant X7	CDP-OH_P_transf
412200	2599.55	2258.06	2095.3	1115.29	1499.82	1450.12	2317.64	1355.08	0.773982	0.00012118	0.00138826	LOC412200	NC_037645.1	3865175	3868783	+	2938	protein_coding	threonine--tRNA ligase%2C cytoplasmic%2C transcript variant X3	tRNA-synt_2b
409305	1129.1	811.115	877.878	498.005	567.624	561.111	939.363	542.247	0.7922	0.000122515	0.00140092	LOC409305	NC_037643.1	15380573	15407415	+	4290	protein_coding	elongation factor-like GTPase 1%2C transcript variant X1	GTP_EFTU
551318	1969.35	2056.64	1677.27	1132.19	1217.39	1270.72	1901.09	1206.77	0.655306	0.000122575	0.00140092	LOC551318	NC_037638.1	8246180	8246858	-	473	protein_coding	uncharacterized LOC551318	-
726134	8224.48	6463.88	9013.39	2896.58	4399.78	4772.93	7900.58	4023.1	0.973677	0.000122766	0.00140145	LOC726134	NC_037644.1	8750217	8757061	+	1790	protein_coding	carboxylesterase	COesterase
411695	3500.31	3743.1	3551.61	2310.11	2547.38	2492.61	3598.34	2450.03	0.55448	0.000124268	0.00141359	LOC411695	NC_037644.1	13474058	13475263	+	879	protein_coding	proteasome subunit beta type-1	Proteasome
410819	1498.99	2264.59	1577.45	894.619	1100.17	844.158	1780.34	946.318	0.911489	0.000127093	0.00144232	LOC410819	NC_037639.1	14094621	14124159	+	11692	protein_coding	proton channel OtopLc%2C transcript variant X5	-
725363	2081.24	1176.93	963.191	741.54	443.946	537.192	1407.12	574.226	1.2928	0.000130715	0.00148169	LOC725363	NC_037642.1	10720587	10722797	+	1687	protein_coding	isopentenyl-diphosphate Delta-isomerase 1%2C transcript variant X2	NUDIX
411493	466.937	545.461	468.372	230.613	225.204	333.876	493.59	263.231	0.907242	0.000131312	0.00148672	LOC411493	NC_037640.1	7126265	7127129	-	720	protein_coding	protein transport protein SFT2	-
551971	3411.26	3204.18	4008.04	2112.3	2412.63	2184.65	3541.16	2236.52	0.663114	0.00013333	0.0015078	Ube2g1	NC_037640.1	13067586	13070844	+	1932	protein_coding	ubiquitin-conjugating enzyme E2G 1 (UBC7 homolog%2C yeast)	UQ_con
100577923	586.81	545.461	771.236	339.955	263.968	388.692	634.502	330.872	0.940806	0.000133854	0.00151103	LOC100577923	NC_037643.1	3698509	3699590	+	763	protein_coding	protein LLP homolog	-
726350	743.217	606.431	808.774	409.537	461.483	344.839	719.474	405.286	0.8282	0.000133928	0.00151103	LOC726350	NC_037638.1	24960955	24970034	-	2382	protein_coding	ATP-dependent RNA helicase DHX33	HA2
408894	1653.12	1427.34	1197.8	745.516	543.627	902.96	1426.09	730.701	0.964636	0.000134876	0.00151818	LOC408894	NC_037643.1	7209308	7292653	+	3905	protein_coding	transducin-like enhancer protein 3%2C transcript variant X1	-
102656442	558.269	621.673	592.93	316.099	344.266	407.628	590.957	355.998	0.731438	0.000136304	0.00153246	LOC102656442	NC_037640.1	8284959	8286040	+	787	protein_coding	splicing factor 3B subunit 5%2C transcript variant X1	-
411188	1705.63	6032.73	3594.27	1076.53	1619.8	1160.09	3777.54	1285.47	1.55511	0.000137679	0.00154255	LOC411188	NC_037644.1	13956935	13959890	+	1438	protein_coding	L-lactate dehydrogenase%2C transcript variant X2	-
552266	16043.7	15563.6	15775.4	9008.82	11012.8	10944.2	15794.2	10321.9	0.613669	0.000140252	0.00156956	LOC552266	NC_037643.1	1820452	1821854	-	565	protein_coding	40S ribosomal protein S12	-
413207	5849.84	6619.57	6104.19	4022.8	3964.14	4447.03	6191.2	4144.66	0.578987	0.000142344	0.00158929	LOC413207	NC_037639.1	15676763	15685494	+	3832	protein_coding	Na(+)/H(+) exchange regulatory cofactor NHE-RF1%2C transcript variant X2	PDZ
725456	514.886	837.245	489.701	344.925	130.138	119.597	613.944	198.22	1.63119	0.000145506	0.00162272	LOC725456	NC_037651.1	6453280	6457951	-	2520	protein_coding	sodium-dependent nutrient amino acid transporter 1%2C transcript variant X4	SNF
551381	3721.79	3728.95	3924.43	1478.11	1864.39	2625.16	3791.72	1989.22	0.930706	0.000149666	0.00166335	LOC551381	NC_037638.1	25138000	25138911	+	497	protein_coding	uncharacterized LOC551381	-
408286	3331.35	3372.93	3230.83	1690.83	2249.27	2197.6	3311.7	2045.9	0.694734	0.000150018	0.00166344	LOC408286	NC_037647.1	9838586	9849978	-	3863	protein_coding	2-oxoglutarate dehydrogenase%2C mitochondrial%2C transcript variant X4	-
409001	2156.59	1737.64	836.927	663.012	424.564	722.568	1577.05	603.381	1.38585	0.000150479	0.00166664	LOC409001	NC_037646.1	9581343	9628800	+	6038	protein_coding	disheveled-associated activator of morphogenesis 1%2C transcript variant X3	FH2
413014	3219.47	3479.63	3508.95	1400.58	1921.61	2300.26	3402.68	1874.15	0.860467	0.000151203	0.00167083	LOC413014	NC_037642.1	13725195	13726100	+	604	protein_coding	NADH dehydrogenase [ubiquinone] 1 alpha subcomplex subunit 5	-
409306	4095.11	4381.11	3989.27	633.192	378.416	2189.63	4155.16	1067.08	1.96134	0.000154169	0.00169565	LOC409306	NC_037641.1	416774	430011	-	1503	protein_coding	2-oxoisovalerate dehydrogenase subunit beta%2C mitochondrial	-
413399	1672.52	1655.98	2434.85	687.863	1220.16	823.229	1921.12	910.417	1.07743	0.000154495	0.00169565	LOC413399	NC_037641.1	5057625	5131172	-	7198	protein_coding	zinc finger SWIM domain-containing protein 8%2C transcript variant X3	-
novel.160	1139.37	1314.11	1102.25	432.399	496.555	804.293	1185.25	577.749	1.03673	0.000157187	0.00171823	-	NC_037641.1	5893300	5893974	-	506	-	-	-
552384	1576.62	1445.85	1628.64	984.081	1041.11	1075.38	1550.37	1033.52	0.585234	0.000158635	0.00172925	LOC552384	NC_037646.1	11426625	11434966	+	2018	protein_coding	COP9 signalosome complex subunit 3	-
726468	26.2581	22.8636	22.1816	4.97011	5.53779	2.98994	23.7677	4.49928	2.39415	0.00015888	0.00172997	LOC726468	NC_037638.1	15187944	15188546	+	603	protein_coding	histone H2A	Histone
552152	707.826	783.896	853.99	497.011	465.175	520.249	781.904	494.145	0.662995	0.000162352	0.0017638	LOC552152	NC_037644.1	5286337	5287361	-	771	protein_coding	28S ribosomal protein S24%2C mitochondrial	-
102655819	885.924	1306.49	1547.59	704.761	644.23	587.024	1246.67	645.338	0.950561	0.000164093	0.00178072	LOC102655819	NC_037638.1	26247605	26256718	+	3868	protein_coding	extensin	-
725396	2034.43	2015.27	2898.11	1332.98	1242.31	1401.28	2315.93	1325.53	0.805495	0.000165103	0.00178766	LOC725396	NC_037639.1	6609711	6612128	+	1249	protein_coding	THO complex subunit 4	RRM_1
411355	1522.97	1383.79	1831.68	586.473	1018.95	819.242	1579.48	808.223	0.966651	0.000166122	0.00179631	LOC411355	NC_037643.1	5445314	5458762	+	6200	protein_coding	von Willebrand factor A domain-containing protein 8	AAA_5
412194	835.691	737.08	906.884	487.07	509.477	554.135	826.552	516.894	0.677851	0.000166274	0.00179631	LOC412194	NC_037643.1	16805521	16807702	+	1202	protein_coding	presenilins-associated rhomboid-like protein%2C mitochondrial%2C transcript variant X2	Rhomboid
408424	1933.96	2319.03	2288.11	1398.59	1492.44	1360.42	2180.37	1417.15	0.621713	0.000168948	0.00182317	LOC408424	NC_037650.1	5654080	5656491	+	1096	protein_coding	COP9 signalosome complex subunit 8	-
550901	421.271	365.818	411.212	266.398	232.587	222.252	399.434	240.412	0.732785	0.000169138	0.00182318	LOC550901	NC_037638.1	23256777	23259395	+	1811	protein_coding	protein phosphatase methylesterase 1	-
409936	278.564	287.429	306.276	176.936	184.593	158.467	290.756	173.332	0.746715	0.000170553	0.00183527	LOC409936	NC_037638.1	19768080	19773364	-	2357	protein_coding	zinc finger and BTB domain-containing protein 34%2C transcript variant X2	BTB
726243	401.862	333.156	412.065	210.733	198.438	250.158	382.361	219.776	0.800002	0.000171648	0.00184407	LOC726243	NC_037638.1	6847872	6944675	+	3322	protein_coding	flotillin-2%2C transcript variant X3	-
725046	414.421	661.957	774.648	169.978	331.345	276.071	617.009	259.131	1.25192	0.000173305	0.00185981	LOC725046	NC_037647.1	3260327	3302772	-	8489	protein_coding	uncharacterized LOC725046%2C transcript variant X4	-
409614	814	695.708	760.998	434.387	447.638	526.229	756.902	469.418	0.689312	0.000174311	0.00186853	LOC409614	NC_037651.1	10574488	10577092	+	2113	protein_coding	group XIIA secretory phospholipase A2	-
412056	1432.78	1161.69	675.684	617.287	369.186	322.913	1090.05	436.462	1.32006	0.000176852	0.00189367	LOC412056	NC_037653.1	7192243	7209406	+	2871	protein_coding	organic cation transporter protein%2C transcript variant X1	Sugar_tr
410575	831.124	742.524	672.272	457.25	448.561	498.323	748.64	468.045	0.67693	0.000178675	0.00191107	LOC410575	NC_037652.1	9113715	9117011	+	2438	protein_coding	dual specificity mitogen-activated protein kinase kinase 4	Pkinase
725538	1397.39	1183.47	1272.88	594.425	735.604	883.028	1284.58	737.685	0.800152	0.000179397	0.00191456	LOC725538	NC_037647.1	10215361	10216198	+	627	protein_coding	28S ribosomal protein S28%2C mitochondrial	-
551329	1301.49	1012.53	2542.35	471.166	655.306	764.427	1618.79	630.299	1.36124	0.000181195	0.00193046	LOC551329	NC_037653.1	1095078	1098007	+	2230	protein_coding	ATPase family AAA domain-containing protein 3A homolog	AAA
724542	546.852	406.102	649.237	259.44	324.884	237.202	534.064	273.842	0.964131	0.000181287	0.00193046	LOC724542	NC_037647.1	2853072	2855966	+	2326	protein_coding	U3 small nucleolar RNA-associated protein 4 homolog	-
552632	11496.5	11803.1	11539.5	7984.97	8444.21	8250.23	11613	8226.47	0.497386	0.000181954	0.00193544	LOC552632	NC_037651.1	8277568	8278703	-	607	protein_coding	60S ribosomal protein L22	-
551086	69.6409	76.2121	156.124	41.7489	31.3808	26.9094	100.659	33.3464	1.59994	0.000188003	0.00199759	LOC551086	NC_037643.1	1992466	2053652	-	8274	protein_coding	zinc finger protein chinmo%2C transcript variant X3	-
413618	1014.93	999.468	1103.96	678.917	697.762	712.601	1039.45	696.427	0.578208	0.000194035	0.00205266	LOC413618	NC_037645.1	3848204	3855976	-	4252	protein_coding	uncharacterized LOC413618	WD40
412554	3955.83	3628.79	3109.68	1768.36	1618.88	2493.61	3564.77	1960.28	0.862702	0.000194992	0.00205603	LOC412554	NC_037652.1	5098612	5099750	-	897	protein_coding	transmembrane emp24 domain-containing protein eca	-
408474	10023.7	13867.3	10479.1	6602.29	4289.94	6941.63	11456.7	5944.62	0.946559	0.000195871	0.00206305	LOC408474	NC_037651.1	9009975	9021058	-	2160	protein_coding	apyrase%2C transcript variant X1	Metallophos
551759	367.613	281.985	214.137	123.259	114.448	166.44	287.912	134.715	1.09426	0.000198254	0.00208326	LOC551759	NC_037649.1	3844792	3847257	+	1572	protein_coding	excitatory amino acid transporter 3%2C transcript variant X2	SDF
552019	123.299	114.318	112.614	48.707	57.2239	66.7752	116.744	57.5687	1.01917	0.000198437	0.00208326	LOC552019	NC_037653.1	2961704	2976676	-	6278	protein_coding	rootletin%2C transcript variant X2	-
100578560	1569.77	1527.51	1460.57	762.414	850.051	1095.31	1519.28	902.593	0.751211	0.000199855	0.0020936	LOC100578560	NC_037652.1	2812701	2813409	-	553	protein_coding	28S ribosomal protein S18c%2C mitochondrial	-
552085	591.377	485.58	476.903	342.937	297.195	286.037	517.954	308.723	0.745781	0.000201426	0.00210551	LOC552085	NC_037648.1	7090566	7093756	-	1781	protein_coding	developmentally-regulated GTP-binding protein 2%2C transcript variant X1	-
409481	17297.2	17238.1	15533.9	9935.24	10986.1	12087.3	16689.7	11002.9	0.601054	0.000202203	0.00210989	LOC409481	NC_037638.1	11885324	11888985	+	2280	protein_coding	ADP-ribosylation factor 1%2C transcript variant X1	Arf
726980	14713.6	13706.2	13386.6	8799.08	6664.73	9618.62	13935.5	8360.81	0.737062	0.000202282	0.00210989	LOC726980	NC_037641.1	3482600	3485558	-	816	protein_coding	uncharacterized LOC726980	-
408405	431.545	791.517	935.038	332.997	340.574	316.933	719.367	330.168	1.12441	0.00020443	0.00212919	LOC408405	NC_037650.1	3768097	3780972	-	6134	protein_coding	uncharacterized LOC408405%2C transcript variant X2	-
102654426	20557.8	21216.4	19936.1	13165.8	15131.1	14133.4	20570.1	14143.4	0.540392	0.000204573	0.00212919	LOC102654426	NC_037639.1	6367687	6369388	+	817	protein_coding	60S ribosomal protein L18	-
724631	4396.51	5261.9	4779.27	2979.08	2909.19	3445.4	4812.56	3111.22	0.629373	0.000206205	0.00214319	LOC724631	NC_037644.1	3804858	3806666	-	1017	protein_coding	60S ribosomal protein L29	-
102654121	729.517	737.08	778.061	460.232	433.794	532.209	748.219	475.411	0.654888	0.000206951	0.00214471	LOC102654121	NC_037644.1	5274442	5275503	+	950	protein_coding	protein YIPF5	-
413556	640.468	632.561	708.104	411.525	434.717	442.51	660.377	429.584	0.620996	0.000207691	0.00215007	LOC413556	NC_037645.1	2477064	2481964	-	2605	protein_coding	putative sodium-dependent multivitamin transporter%2C transcript variant X5	-
406122	64188.4	71785.3	69946.1	49532.1	45896.3	47269.9	68639.9	47566.1	0.52912	0.000208141	0.00215243	Arp1	NC_037644.1	12424728	12428682	+	1763	protein_coding	actin related protein 1%2C transcript variant 1	Actin
724465	125.582	57.7035	173.187	38.7668	43.3794	34.8826	118.824	39.0096	1.60955	0.000212454	0.00218302	LOC724465	NC_037651.1	2827572	2829119	-	1548	protein_coding	enhancer of split mbeta protein	HLH
409571	1800.39	1560.17	1315.54	900.583	1020.8	926.88	1558.7	949.421	0.714601	0.000216499	0.00221751	LOC409571	NC_037638.1	12054415	12056642	+	1574	protein_coding	Golgi reassembly-stacking protein 2	-
726860	19643.3	23094.5	21039.2	12094.3	13040.6	15412.1	21259	13515.7	0.653448	0.000219009	0.00224084	LOC726860	NC_037646.1	8747290	8750894	-	1125	protein_coding	cytochrome b5	-
551446	6857.92	7247.77	10674.4	4158.99	4534.53	5018.11	8260.05	4570.54	0.853905	0.000220513	0.00225385	LOC551446	NC_037651.1	10602411	10614979	-	2576	protein_coding	RNA-binding protein lark%2C transcript variant X6	RRM_1
551414	937.298	847.043	778.914	566.592	507.631	563.105	854.419	545.776	0.64616	0.000221165	0.00225589	LOC551414	NC_037647.1	244996	246429	+	1081	protein_coding	probable 18S rRNA (guanine-N(7))-methyltransferase	Methyltransf_11
102654146	281.989	235.169	314.807	52.6831	35.9957	153.483	277.322	80.7207	1.78233	0.0002225	0.00226697	LOC102654146	NC_037639.1	346229	353976	-	1373	protein_coding	antifreeze protein Maxi	-
725253	1215.86	1354.4	1421.33	660.03	635.923	949.803	1330.53	748.585	0.830166	0.000224417	0.00227929	LOC725253	NC_037641.1	7858840	7859814	+	594	protein_coding	MICOS complex subunit MIC13	-
409007	4195.58	3780.12	5501.88	2676.9	2803.97	2526.5	4492.53	2669.12	0.751342	0.00022793	0.00231255	LOC409007	NC_037646.1	8674489	8765777	+	5682	protein_coding	heterogeneous nuclear ribonucleoprotein K%2C transcript variant X3	-
552764	3200.06	2431.17	2626.81	1418.47	1720.41	1815.89	2752.68	1651.59	0.736837	0.000229766	0.00232629	LOC552764	NC_037642.1	6601753	6607553	+	3359	protein_coding	eukaryotic translation initiation factor 2A	-
408397	3585.94	3262.97	3402.31	2454.24	2228.96	2369.03	3417.07	2350.74	0.53966	0.000230826	0.00233214	LOC408397	NC_037650.1	2490772	2492953	-	1966	protein_coding	26S proteasome non-ATPase regulatory subunit 11	-
414027	774.042	754.5	737.11	533.789	491.018	462.443	755.217	495.75	0.607072	0.000232457	0.00234617	LOC414027	NC_037647.1	8687821	8689285	-	1003	protein_coding	N-alpha-acetyltransferase 20%2C transcript variant X1	Acetyltransf_1
novel.11	37.6746	29.3961	45.2162	7.95217	14.7674	5.97987	37.429	9.5665	1.96362	0.000233206	0.00235127	-	NC_037638.1	4710812	4712156	+	1242	-	-	-
551707	1917.98	1893.33	3004.75	1082.49	1178.63	1360.42	2272.02	1207.18	0.912756	0.000233738	0.00235418	LOC551707	NC_037648.1	13502749	13505191	-	1543	protein_coding	RNA-binding protein with serine-rich domain 1%2C transcript variant X2	RRM_1
410470	2314.13	2456.21	2244.6	1164.99	1063.26	1688.32	2338.31	1305.52	0.840929	0.000236342	0.00237546	LOC410470	NC_037650.1	8782525	9104945	+	4564	protein_coding	putative polypeptide N-acetylgalactosaminyltransferase 9%2C transcript variant X6	Glycos_transf_2
113218538	20.5498	32.6623	5.97196	1.98804	0	0	19.728	0.662681	4.91447	0.000237314	0.00238028	LOC113218538	NC_037641.1	4957569	4959593	-	2025	protein_coding	uncharacterized LOC113218538	-
724407	7635.39	8353.94	6122.96	3334.94	2372.94	4855.66	7370.76	3521.18	1.06576	0.000240871	0.00241025	LOC724407	NC_037649.1	3064854	3067906	-	1422	protein_coding	uncharacterized LOC724407	-
726205	563.977	530.219	551.126	314.111	369.186	364.772	548.441	349.356	0.65039	0.000242165	0.0024164	LOC726205	NC_037650.1	4316899	4317795	-	823	protein_coding	inosine triphosphate pyrophosphatase%2C transcript variant X1	-
408573	1421.36	1142.09	1897.38	781.301	866.665	803.296	1486.94	817.087	0.864272	0.000244959	0.00244177	LOC408573	NC_037638.1	20268001	20269587	+	1102	protein_coding	eukaryotic translation initiation factor 6	-
412289	1459.03	1328.27	1469.95	994.021	968.191	869.075	1419.09	943.762	0.588539	0.000246672	0.0024563	LOC412289	NC_037646.1	12333496	12339176	-	1670	protein_coding	cytosolic Fe-S cluster assembly factor NUBP1 homolog%2C transcript variant X2	-
100576749	170.107	64.2359	24.741	24.8505	9.22966	9.96645	86.3611	14.6822	2.55474	0.000247303	0.00245763	Or50	NC_037639.1	10117134	10119750	+	1909	protein_coding	odorant receptor 50%2C transcript variant X2	-
724186	15757.1	15235.9	14663.7	9450.16	11382	9650.51	15218.9	10160.9	0.582796	0.000247957	0.00245897	LOC724186	NC_037652.1	2476081	2477360	-	765	protein_coding	60S ribosomal protein L19	-
107965773	31714	32897.5	32536.9	22620	20343.1	23820.8	32382.8	22261.3	0.540702	0.000248311	0.00245996	LOC107965773	NC_037650.1	1190474	1192276	-	603	protein_coding	larval cuticle protein LCP-17%2C transcript variant X2	Chitin_bind_4
100577341	932.732	1041.93	1109.93	459.238	491.018	728.548	1028.2	559.601	0.878109	0.000257473	0.00254551	LOC100577341	NC_037644.1	3512949	3513823	-	662	protein_coding	uncharacterized LOC100577341	-
412360	295.689	260.21	273.857	161.031	92.2966	157.47	276.585	136.933	1.01551	0.000258971	0.00255771	LOC412360	NC_037643.1	16561855	16567759	-	2805	protein_coding	transmembrane protein 231	-
408871	84137.7	65876.7	58787.9	37117.8	37829.6	46873.2	69600.8	40606.9	0.777371	0.000260585	0.00257101	LOC408871	NC_037643.1	15330666	15336329	-	2302	protein_coding	sorbitol dehydrogenase	ADH_N
409500	1667.96	1529.69	2522.73	894.619	1005.11	1133.19	1906.79	1010.97	0.915873	0.000261351	0.00257594	LOC409500	NC_037642.1	13888315	13889536	+	759	protein_coding	mitochondrial import receptor subunit TOM22 homolog	-
552259	15850.7	12589.2	10607.9	6723.56	5037.55	8442.58	13015.9	6734.56	0.950607	0.000262358	0.00258324	LOC552259	NC_037644.1	9554706	9559092	+	3112	protein_coding	staphylococcal nuclease domain-containing protein 1	-
102654965	165.54	189.442	135.649	91.45	61.8387	33.8859	163.543	62.3915	1.389	0.00026548	0.00260472	LOC102654965	NC_037641.1	2866048	2876397	+	10350	protein_coding	uncharacterized LOC102654965	-
726307	1444.19	1255.32	1099.69	557.646	706.992	853.128	1266.4	705.922	0.842781	0.000266835	0.00261401	LOC726307	NC_037641.1	11229581	11252054	-	7072	protein_coding	serine-rich adhesin for platelets%2C transcript variant X1	-
727546	10271.5	11450.3	24956.8	2998.96	4170.88	8291.09	15559.5	5153.64	1.59418	0.000267711	0.00261994	LOC727546	NC_037640.1	1547769	1548693	-	736	protein_coding	uncharacterized LOC727546	-
724336	618.777	523.686	604.021	343.931	395.952	282.051	582.161	340.645	0.772783	0.00027649	0.00269494	LOC724336	NC_037648.1	8800274	8917765	-	1524	protein_coding	tRNA dimethylallyltransferase%2C transcript variant X1	IPPT
413470	18711.7	17468.9	16604.6	10825.9	12980.6	11522.2	17595.1	11776.2	0.579253	0.000283451	0.00275723	LOC413470	NC_037638.1	9273481	9275481	+	1408	protein_coding	60S ribosomal protein L17	-
551914	489.77	249.323	408.653	217.691	147.674	151.49	382.582	172.285	1.15137	0.000284206	0.00275956	LOC551914	NC_037639.1	11747327	11752279	+	3618	protein_coding	actin-like protein 6B	Actin
410055	706.684	612.963	604.021	404.567	431.948	401.648	641.223	412.721	0.634821	0.000284261	0.00275956	LOC410055	NC_037643.1	16441975	16443688	-	1300	protein_coding	probable tRNA(His) guanylyltransferase	-
412452	1060.6	850.31	1115.05	593.431	666.381	464.437	1008.65	574.749	0.811447	0.000285143	0.00276534	LOC412452	NC_037649.1	2497853	2499829	+	1438	protein_coding	max-like protein X	HLH
408633	312.813	323.357	443.631	193.834	184.593	219.262	359.934	199.23	0.855738	0.000286288	0.00276881	LOC408633	NC_037638.1	24974569	24976261	-	856	protein_coding	chromatin complexes subunit BAP18%2C transcript variant X2	Myb_DNA-binding
411902	385.879	436.587	557.951	283.296	262.122	216.272	460.139	253.897	0.859253	0.000286426	0.00276881	LOC411902	NC_037652.1	2556243	2574342	-	2244	protein_coding	transmembrane protein 205	-
411781	1127.95	1045.19	732.844	364.806	598.082	504.302	968.665	489.063	0.985063	0.000286646	0.00276881	LOC411781	NC_037638.1	14052438	14058794	-	2374	protein_coding	sodium/potassium/calcium exchanger 4%2C transcript variant X1	Na_Ca_ex
novel.293	82.1991	97.987	133.089	37.7728	39.6875	55.8121	104.425	44.4242	1.23855	0.000287706	0.00277628	-	NC_037645.1	7673217	7681746	-	2268	-	-	-
411924	864.232	865.552	1062.16	363.812	403.336	645.826	930.647	470.991	0.983111	0.000289241	0.00278831	LOC411924	NC_037646.1	6535783	6537216	-	823	protein_coding	probable 28S ribosomal protein S25%2C mitochondrial%2C transcript variant X2	-
725899	30999.3	26652.5	19756.9	15000.8	9717.9	15184.9	25802.9	13301.2	0.955968	0.0002934	0.00282559	LOC725899	NC_037642.1	13351039	13356183	-	1793	protein_coding	alpha-N-acetylgalactosaminidase%2C transcript variant X2	-
409386	2807.33	2794.81	2797.44	1837.95	1585.65	2048.11	2799.86	1823.9	0.618442	0.000293977	0.00282833	LOC409386	NC_037644.1	5875772	5879187	+	2200	protein_coding	ubiquitin-conjugating enzyme E2 N	UQ_con
novel.64	795.733	471.426	217.55	201.786	45.2253	128.567	494.903	125.193	1.98304	0.000296431	0.00284909	-	NC_037638.1	24558049	24563107	-	4830	-	-	-
408711	415.562	549.816	483.729	310.135	220.589	284.044	483.036	271.589	0.831524	0.000298636	0.00286459	LOC408711	NC_037639.1	5659573	5660873	+	1031	protein_coding	zinc finger matrin-type protein 5%2C transcript variant X2	-
552715	613.068	592.277	744.788	367.788	399.644	432.544	650.045	399.992	0.701616	0.000303541	0.00290588	LOC552715	NC_037648.1	13637817	13639440	-	1175	protein_coding	U5 small nuclear ribonucleoprotein 40 kDa protein	WD40
413612	707.826	720.749	830.102	462.22	467.021	522.242	752.892	483.828	0.638855	0.0003054	0.00292078	LOC413612	NC_037645.1	6971030	6972077	-	864	protein_coding	uncharacterized protein C1orf50 homolog%2C transcript variant X1	-
100577899	281.989	313.558	197.928	121.271	91.3736	157.47	264.492	123.371	1.09953	0.000306528	0.00292867	LOC100577899	NC_037652.1	7413080	7413785	-	706	protein_coding	DNA replication complex GINS protein SLD5	-
408649	1005.8	1309.76	1975.01	614.305	771.599	732.534	1430.19	706.146	1.01871	0.000311873	0.00297387	LOC408649	NC_037639.1	15784750	15815523	-	6474	protein_coding	trithorax group protein osa%2C transcript variant X1	-
410266	490.911	507.355	631.321	237.571	251.97	372.745	543.196	287.429	0.919437	0.00031373	0.00298863	LOC410266	NC_037648.1	14518146	14519986	+	1323	protein_coding	replication factor C subunit 5%2C transcript variant X2	AAA
410673	142.707	148.069	145.033	71.5695	87.6817	78.735	145.27	79.3287	0.87184	0.000314297	0.00299108	LOC410673	NC_037638.1	21688594	21690690	-	1541	protein_coding	protein RRNAD1	-
551511	1140.51	1134.47	1119.32	765.396	662.689	808.279	1131.43	745.455	0.602153	0.000314919	0.00299406	LOC551511	NC_037641.1	2836827	2839141	-	1151	protein_coding	elongin-B	ubiquitin
100578337	416.704	407.191	412.065	271.368	193.823	129.564	411.986	198.251	1.05528	0.000315577	0.00299736	LOC100578337	NC_037645.1	2974041	3050843	+	9818	protein_coding	uncharacterized LOC100578337%2C transcript variant X3	-
409734	448.67	394.126	650.09	199.798	285.196	267.101	497.629	250.699	0.990179	0.000322262	0.00304589	LOC409734	NC_037638.1	11350325	11352483	-	1737	protein_coding	nuclear pore glycoprotein p62%2C transcript variant X2	-
409411	1506.98	1491.58	1209.75	902.571	814.056	949.803	1402.77	888.81	0.657947	0.000323427	0.00305392	LOC409411	NC_037646.1	1296396	1298398	-	1333	protein_coding	transmembrane protein 41 homolog%2C transcript variant X2	-
100578165	116.449	119.762	135.649	70.5755	35.9957	58.8021	123.953	55.1244	1.17309	0.000325021	0.00306598	LOC100578165	NC_037640.1	3673951	3752242	-	3818	protein_coding	uncharacterized LOC100578165%2C transcript variant X1	-
novel.411	89.049	50.0823	96.4045	6.95815	13.8445	35.8792	78.5119	18.894	2.05845	0.000326682	0.00307864	-	NC_037650.1	3000520	3005750	+	2838	-	-	-
102655520	77.6325	116.496	110.055	51.6891	35.9957	47.839	101.394	45.1746	1.17047	0.000329774	0.00310173	LOC102655520	NC_037652.1	4490499	4494718	+	2558	protein_coding	uncharacterized LOC102655520%2C transcript variant X1	-
727023	645.035	554.171	657.768	405.561	411.643	369.755	618.991	395.653	0.645957	0.000331199	0.00311211	LOC727023	NC_037647.1	5251857	5253265	-	1164	protein_coding	transcription initiation factor TFIID subunit 9%2C transcript variant X1	-
410059	11554.7	11038.8	11591.6	4797.15	7310.81	7526.66	11395	6544.87	0.799953	0.000334236	0.0031376	LOC410059	NC_037649.1	10064863	10076340	-	2429	protein_coding	probable citrate synthase 2%2C mitochondrial	Citrate_synt
727049	615.352	670.667	640.706	197.81	295.349	428.557	642.241	307.239	1.06387	0.000336245	0.00315034	LOC727049	NC_037639.1	101623	102269	+	430	protein_coding	NADH dehydrogenase [ubiquinone] 1 alpha subcomplex subunit 2	-
409326	39774.1	44107.2	41923.1	20530.5	26646	29814.6	41934.8	25663.7	0.708417	0.000356775	0.00331698	LOC409326	NC_037645.1	1972952	1974405	+	1024	protein_coding	40S ribosomal protein S2	-
411183	7699.32	7085.55	5748.44	3042.7	3840.46	4705.16	6844.43	3862.77	0.825216	0.000360016	0.0033439	LOC411183	NC_037643.1	2054023	2055597	-	1056	protein_coding	cytochrome b-c1 complex subunit Rieske%2C mitochondrial	-
551363	1371.13	545.461	152.711	166.996	174.44	152.487	689.767	164.641	2.06604	0.000360905	0.00334893	LOC551363	NC_037650.1	10324191	10326978	-	1258	protein_coding	vesicle transport through interaction with t-SNAREs homolog 1A%2C transcript variant X2	-
412839	317.38	472.515	441.072	242.541	225.204	231.222	410.322	232.989	0.817552	0.000378802	0.00350156	LOC412839	NC_037648.1	1844899	1885038	+	10738	protein_coding	homeobox protein caupolican%2C transcript variant X1	Coprinus_mating
100576547	1416.79	2069.7	499.938	632.198	259.353	269.094	1328.81	386.882	1.78002	0.000379924	0.00350858	LOC100576547	NC_037638.1	5660398	5680679	-	3375	protein_coding	glucose dehydrogenase [FAD%2C quinone]%2C transcript variant X1	-
552597	107.316	135.004	106.642	68.5875	36.9186	49.8323	116.321	51.7795	1.16905	0.000383907	0.00353851	LOC552597	NC_037653.1	5215799	5217268	+	612	protein_coding	cyclin-dependent kinases regulatory subunit%2C transcript variant X1	-
726190	971.548	990.758	1252.4	581.502	722.682	659.779	1071.57	654.655	0.711435	0.000387221	0.00356236	LOC726190	NC_037645.1	5979294	5985805	+	3609	protein_coding	arginine/serine-rich protein PNISR	-
409155	5912.63	5330.49	6728.69	2468.16	3403.9	4110.16	5990.6	3327.41	0.848358	0.000389954	0.0035796	LOC409155	NC_037642.1	9528950	9532493	+	2446	protein_coding	dihydrolipoyllysine-residue succinyltransferase component of 2-oxoglutarate dehydrogenase complex%2C mitochondrial%2C transcript variant X1	Biotin_lipoyl
551766	52473.9	53590.2	54094.8	17878.5	27787.7	36415.4	53386.3	27360.5	0.964373	0.000390205	0.0035796	LOC551766	NC_037651.1	9078678	9081721	+	1790	protein_coding	ATP synthase subunit beta%2C mitochondrial	ATP-synt_ab
724264	933.873	1231.37	993.051	431.405	474.404	736.521	1052.76	547.443	0.943511	0.000398758	0.00365459	LOC724264	NC_037645.1	528143	529121	-	514	protein_coding	NADH dehydrogenase [ubiquinone] 1 alpha subcomplex subunit 7	-
410032	9343.3	8104.62	8095.41	4221.61	5424.27	5998.81	8514.44	5214.89	0.707233	0.000400265	0.00366493	Trxr-1	NC_037638.1	5454493	5460515	+	2622	protein_coding	thioredoxin reductase 1%2C transcript variant 1	Pyr_redox_2
100578782	1346.01	1485.05	1449.48	659.036	799.288	1032.52	1426.85	830.283	0.781273	0.00040122	0.00366673	LOC100578782	NC_037638.1	14347351	14348563	-	845	protein_coding	cytochrome b-c1 complex subunit 9%2C transcript variant X2	-
726480	1366.56	1014.71	1136.38	570.568	545.473	824.226	1172.55	646.755	0.858407	0.000406121	0.00370451	LOC726480	NC_037642.1	6550661	6551456	-	567	protein_coding	39S ribosomal protein L54%2C mitochondrial	-
724456	1804.96	1968.45	1947.71	689.851	1364.14	830.205	1907.04	961.4	0.987895	0.000411024	0.00374218	Msx	NC_037638.1	15541180	15561401	+	3546	protein_coding	homeobox protein Msx%2C transcript variant X1	-
726042	6732.34	7479.68	5678.48	2673.92	3127.01	4703.17	6630.16	3501.36	0.921099	0.000414255	0.00376402	LOC726042	NC_037640.1	9361199	9362189	+	635	protein_coding	cytochrome c oxidase subunit 6A1%2C mitochondrial	-
544670	236647	216003	217882	118567	155562	155234	223510	143121	0.643103	0.000417186	0.00377694	EF1a-F2	NC_037642.1	12770336	12774960	-	2886	protein_coding	elongation factor 1-alpha F2%2C transcript variant X1	GTP_EFTU
novel.324	258.014	334.245	338.695	186.876	175.363	187.369	310.318	183.203	0.76199	0.000417862	0.00377952	-	NC_037647.1	6487518	6488274	+	492	-	PF15320:mRNA cap methylation, RNMT-activating mini protein	-
409473	2072.1	1866.11	1706.27	1142.13	1249.7	1324.54	1881.49	1238.79	0.602607	0.000421857	0.00380497	LOC409473	NC_037645.1	1896868	1898123	+	853	protein_coding	NADH dehydrogenase [ubiquinone] 1 alpha subcomplex subunit 8	-
410271	2259.33	2464.92	4107	1501.97	1617.04	1492.97	2943.75	1537.33	0.937548	0.000425871	0.00383129	LOC410271	NC_037648.1	16129148	16137740	-	4078	protein_coding	BMP-binding endothelial regulator protein%2C transcript variant X1	VWD
725060	105.032	100.165	118.586	55.6652	53.532	58.8021	107.928	55.9998	0.949382	0.000425963	0.00383129	LOC725060	NC_037640.1	8343563	8344943	-	708	protein_coding	coenzyme Q-binding protein COQ10 homolog B%2C mitochondrial	-
411447	1026.35	901.481	1266.91	472.16	585.16	716.588	1064.91	591.303	0.849297	0.000430345	0.0038651	LOC411447	NC_037646.1	7710872	7719469	-	2000	protein_coding	serine palmitoyltransferase 2%2C transcript variant X1	Aminotran_1_2
102656425	503.47	614.052	523.826	224.649	292.58	374.739	547.116	297.322	0.879765	0.000430521	0.0038651	LOC102656425	NC_037651.1	8201332	8202118	+	517	protein_coding	CDGSH iron-sulfur domain-containing protein 3%2C mitochondrial	-
100576816	129.007	42.461	22.1816	9.94021	0.922966	14.9497	64.5499	8.60429	2.91061	0.000435234	0.00389655	LOC100576816	NC_037639.1	10112336	10114588	+	1564	protein_coding	odorant receptor 4%2C transcript variant X1	-
725966	3139.55	1780.1	1273.73	334.985	17.5363	128.567	2064.46	160.363	3.68654	0.000448467	0.00400391	LOC725966	NC_037644.1	13322598	13326341	+	3528	protein_coding	fork head domain-containing protein crocodile	Fork_head
724943	817.425	919.989	898.353	565.598	582.391	623.9	878.589	590.63	0.57324	0.000452277	0.00403419	LOC724943	NC_037649.1	3960209	3962005	+	1448	protein_coding	phosphatidylinositol glycan anchor biosynthesis class U protein	-
408386	1799.25	1700.62	1749.78	1190.84	1292.15	1182.02	1749.88	1221.67	0.518274	0.000455167	0.00405623	LOC408386	NC_037649.1	11386011	11387659	+	1197	protein_coding	eukaryotic translation initiation factor 3 subunit G	RRM_1
408836	2467.12	2756.7	3016.69	1753.45	1852.39	1252.78	2746.84	1619.54	0.762237	0.000458988	0.00408651	LOC408836	NC_037642.1	8845347	8881524	-	3463	protein_coding	unc-112-related protein	Band_41
413211	6380.71	2668.51	2364.04	484.088	21.2282	273.081	3804.42	259.466	3.87417	0.000459433	0.00408671	SIFR	NC_037649.1	705846	781537	+	12285	protein_coding	SIFamide receptor%2C transcript variant X1	-
409372	20.5498	21.7749	27.3004	6.95815	2.7689	4.98323	23.2084	4.90342	2.25553	0.000460853	0.00409557	crh-BP	NC_037645.1	2187253	2195465	-	1096	protein_coding	corticotropin releasing hormone binding protein	-
551016	968.123	882.972	1465.69	534.783	579.622	672.735	1105.59	595.714	0.892949	0.00046309	0.00411167	LOC551016	NC_037645.1	11437016	11551701	-	16850	protein_coding	midasin	AAA_5
412254	887.066	987.491	1311.27	590.449	658.074	640.843	1061.94	629.789	0.754569	0.000463663	0.00411299	LOC412254	NC_037645.1	12532209	12547220	+	3157	protein_coding	BUB3-interacting and GLEBS motif-containing protein ZNF207%2C transcript variant X4	-
551944	10322.8	8994.12	10306.7	3735.53	4938.79	7048.27	9874.57	5240.87	0.913929	0.000468467	0.0041518	LOC551944	NC_037651.1	9046612	9048898	+	1408	protein_coding	prohibitin-2	-
551623	129.007	120.851	163.802	32.8027	20.3052	78.735	137.887	43.9476	1.65334	0.00046941	0.00415634	LOC551623	NC_037638.1	26349896	26815254	+	7012	protein_coding	nucleolysin TIAR%2C transcript variant X4	RRM_1
412285	31.9663	76.2121	30.7129	14.9103	11.0756	10.9631	46.2971	12.3163	1.90787	0.000473425	0.00418806	Dat	NC_037638.1	5335036	5350924	-	3001	protein_coding	dopamine transporter	SNF
726999	312.813	320.091	401.827	119.283	223.358	173.416	344.911	172.019	1.00373	0.000474529	0.00419399	LOC726999	NC_037642.1	13844908	13857757	-	1897	protein_coding	iroquois-class homeodomain protein IRX-6%2C transcript variant X2	Coprinus_mating
551505	1768.42	1934.7	1924.68	961.219	983.881	1402.28	1875.93	1115.79	0.749727	0.000478537	0.00422169	LOC551505	NC_037653.1	4814726	4816170	-	1178	protein_coding	ER membrane protein complex subunit 3	-
551957	5494.78	4771.97	2848.62	2515.87	2069.29	2197.6	4371.79	2260.92	0.951141	0.000481873	0.00424724	LOC551957	NC_037652.1	5493865	5633547	-	6246	protein_coding	headcase protein%2C transcript variant X1	-
552343	10917.6	8564.07	8814.61	2963.18	4096.12	6521.05	9432.11	4526.78	1.05909	0.000484088	0.00426288	LOC552343	NC_037639.1	1044523	1050328	+	2135	protein_coding	electron transfer flavoprotein-ubiquinone oxidoreductase%2C mitochondrial	-
100578352	14.8415	17.4199	24.741	0	4.61483	1.99329	19.0008	2.20271	3.09199	0.00049681	0.00436696	LOC100578352	NC_037643.1	1681470	1686369	+	1867	protein_coding	ionotropic receptor 75a-like	Lig_chan
724189	790.025	919.989	432.54	336.973	283.35	387.695	714.185	336.006	1.08709	0.0005024	0.00440808	LOC724189	NC_037641.1	4740788	4752382	-	2716	protein_coding	uncharacterized LOC724189%2C transcript variant X2	-
412080	2467.12	2164.42	2272.76	1680.89	1560.73	1427.2	2301.43	1556.27	0.564355	0.000510731	0.00446971	LOC412080	NC_037645.1	7781794	7786350	-	2638	protein_coding	coronin-1C%2C transcript variant X2	-
411187	43.3829	45.7273	45.2162	16.8984	15.6904	18.9363	44.7755	17.175	1.38421	0.000516429	0.00450663	LOC411187	NC_037644.1	13960959	13963652	+	1340	protein_coding	L-lactate dehydrogenase	-
552628	595.944	572.68	626.202	310.135	335.959	437.527	598.275	361.207	0.7285	0.000522268	0.00455348	LOC552628	NC_037638.1	4631390	4632610	-	855	protein_coding	39S ribosomal protein L18%2C mitochondrial	-
726408	1691.93	1711.51	1909.32	1144.12	1162.94	1300.62	1770.92	1202.56	0.558749	0.000524562	0.00456936	LOC726408	NC_037648.1	15330566	15332217	-	1179	protein_coding	zinc finger protein 706%2C transcript variant X1	-
551249	164.398	121.939	52.0413	37.7728	29.5349	44.849	112.793	37.3856	1.58983	0.000528014	0.00459529	LOC551249	NC_037650.1	8708008	8719657	+	5588	protein_coding	uncharacterized LOC551249%2C transcript variant X3	Dpy-30
411890	3342.76	3172.6	4745.15	2078.5	2171.74	2402.91	3753.5	2217.72	0.759426	0.000535499	0.00465624	LOC411890	NC_037642.1	11356811	11360823	-	3749	protein_coding	nucleolysin TIAR	RRM_1
552260	387.021	411.545	558.805	244.529	227.972	293.014	452.457	255.172	0.828326	0.000540777	0.00468948	LOC552260	NC_037638.1	25307338	25308652	+	766	protein_coding	U6 snRNA-associated Sm-like protein LSm1	LSM
412202	957.848	1276.01	1029.74	625.239	481.788	741.504	1087.86	616.177	0.820318	0.000545121	0.00472291	CPR28	NC_037643.1	5280965	5283095	+	1123	protein_coding	cuticular protein 28	Chitin_bind_4
551998	441.82	446.385	577.574	316.099	214.128	290.024	488.593	273.417	0.8393	0.000547671	0.00473271	LOC551998	NC_037644.1	11015051	11016679	-	1026	protein_coding	cell death-inducing p53-target protein 1%2C transcript variant X1	-
409362	1583.47	1464.36	1495.55	1089.45	1006.03	809.276	1514.46	968.252	0.64522	0.000552827	0.00476831	LOC409362	NC_037647.1	8702438	8711780	-	2289	protein_coding	fasciculation and elongation protein zeta-2%2C transcript variant X1	-
725237	192.94	198.152	145.886	106.36	98.7573	77.7383	178.993	94.2853	0.921786	0.000555837	0.00478769	LOC725237	NC_037638.1	10901560	10905921	+	3276	protein_coding	protein scabrous	Fibrinogen_C
551283	2686.31	2688.11	3206.09	1691.82	1958.53	1998.27	2860.17	1882.88	0.603374	0.000556063	0.00478769	LOC551283	NC_037648.1	13460832	13462590	+	1286	protein_coding	SUMO-conjugating enzyme UBC9-B%2C transcript variant X1	UQ_con
726838	67.3576	50.0823	83.6074	26.8386	26.766	29.8994	67.0158	27.8346	1.27288	0.000560203	0.00481905	LOC726838	NC_037650.1	3039034	3041200	-	1351	protein_coding	probable malate dehydrogenase%2C mitochondrial	-
726167	734.084	706.595	690.188	481.106	460.56	507.292	710.289	482.986	0.556293	0.000564598	0.00485253	LOC726167	NC_037646.1	7998598	8002874	+	2394	protein_coding	lipopolysaccharide-induced tumor necrosis factor-alpha factor homolog%2C transcript variant X2	-
100576333	203.214	259.121	224.375	144.133	135.676	117.604	228.904	132.471	0.788938	0.000568185	0.00487902	LOC100576333	NC_037640.1	12283049	12293532	-	2001	protein_coding	nucleoredoxin	-
409991	818.566	566.147	710.663	307.153	456.868	400.651	698.459	388.224	0.846856	0.000572319	0.00490147	LOC409991	NC_037645.1	6967788	6970453	+	1810	protein_coding	dnaJ homolog subfamily C member 11	DnaJ
724860	29.683	35.9286	51.1882	11.9283	11.9986	13.953	38.9333	12.6266	1.63319	0.000573794	0.00490974	LOC724860	NC_037643.1	13215874	13222443	+	1597	protein_coding	probable cytochrome P450 301a1%2C mitochondrial	p450
726546	348.205	285.251	336.989	173.954	223.358	154.48	323.482	183.93	0.813755	0.000574322	0.00490992	LOC726546	NC_037647.1	10944540	10953014	+	971	protein_coding	gem-associated protein 7%2C transcript variant X2	-
413623	679.284	720.749	742.229	490.053	492.864	483.373	714.087	488.763	0.547379	0.000576946	0.00492304	LOC413623	NC_037651.1	2460837	2465574	-	2813	protein_coding	kelch-like protein diablo%2C transcript variant X5	BACK
410825	1819.8	2117.61	2049.23	952.272	1256.16	1410.25	1995.55	1206.23	0.726334	0.000577893	0.00492304	LOC410825	NC_037639.1	13730577	13735477	-	4062	protein_coding	leucine-rich repeat and immunoglobulin-like domain-containing nogo receptor-interacting protein 3	I-set
409169	769.475	666.312	870.2	506.951	502.093	460.45	768.662	489.831	0.650758	0.000580938	0.00494462	LOC409169	NC_037645.1	1456542	1458399	+	1461	protein_coding	mRNA export factor	-
102654122	47.9495	60.9697	48.6288	18.8864	23.0741	21.9262	52.516	21.2956	1.2997	0.000602598	0.00511397	LOC102654122	NC_037643.1	8077086	8080693	+	2488	protein_coding	uncharacterized LOC102654122%2C transcript variant X1	-
413252	1170.2	1037.57	1318.1	687.863	822.362	755.457	1175.29	755.227	0.638351	0.00060295	0.00511397	LOC413252	NC_037645.1	2366850	2370328	+	2102	protein_coding	ATP-binding cassette sub-family F member 2%2C transcript variant X1	ABC_tran
550711	35455.2	39730.5	44061.1	23406.2	28825.1	26031.4	39748.9	26087.6	0.607564	0.000605395	0.00512686	LOC550711	NC_037647.1	4670082	4673118	+	1188	protein_coding	60S acidic ribosomal protein P0	-
100578580	242.031	209.039	244.85	153.079	115.371	135.544	231.973	134.665	0.786146	0.00060553	0.00512686	LOC100578580	NC_037652.1	7554461	7556096	-	1367	protein_coding	guanine nucleotide exchange factor MSS4 homolog	Mss4
408835	377.888	212.305	344.667	108.348	150.443	182.386	311.62	147.059	1.08365	0.000617174	0.0052163	LOC408835	NC_037642.1	8541707	8573378	+	5296	protein_coding	neuroendocrine convertase 2	Peptidase_S8
552161	788.883	804.582	910.297	569.574	519.63	583.037	834.588	557.414	0.583193	0.000629426	0.00531521	LOC552161	NC_037642.1	155998	157349	-	627	protein_coding	mediator of RNA polymerase II transcription subunit 9	-
100577801	1170.2	1186.73	1318.1	766.39	877.74	599.98	1225.01	748.037	0.711604	0.000632153	0.00533359	LOC100577801	NC_037648.1	12238820	12414099	+	12552	protein_coding	zinc finger protein ush%2C transcript variant X1	-
725450	26.2581	30.4849	23.8878	1.98804	5.53779	9.96645	26.8769	5.83076	2.2039	0.000633268	0.00533833	LOC725450	NC_037638.1	15889699	15890243	+	545	protein_coding	histone H2A	Histone
725746	227.189	243.879	372.821	120.277	138.445	168.433	281.296	142.385	0.984981	0.000634002	0.00533986	LOC725746	NC_037638.1	6017412	6018397	-	591	protein_coding	uncharacterized LOC725746	-
727262	2575.57	2626.05	1979.28	1339.94	1268.15	1708.25	2393.63	1438.78	0.734172	0.000640385	0.00538424	LOC727262	NC_037647.1	251248	252276	+	936	protein_coding	derlin-1	-
726740	297.972	389.771	340.402	193.834	198.438	228.232	342.715	206.834	0.728976	0.000642841	0.00539551	LOC726740	NC_037646.1	1535727	1536654	+	540	protein_coding	ubiquitin-conjugating enzyme E2 T	UQ_con
725671	801.441	778.452	717.488	193.834	463.329	409.621	765.794	355.595	1.1062	0.000643453	0.00539597	LOC725671	NC_037646.1	6767875	6784869	+	2076	protein_coding	homeobox protein Nkx-2.8%2C transcript variant X2	Homeobox
406143	922.457	610.786	81.9011	6.95815	11.0756	68.7685	538.381	28.9341	4.21828	0.000650271	0.00543899	Def1	NC_037643.1	8673495	8675023	+	680	protein_coding	defensin 1	-
411065	7394.5	4631.52	4107.85	3184.84	1728.71	2763.7	5377.96	2559.09	1.0714	0.000668048	0.00556777	LOC411065	NC_037642.1	5416314	5437784	+	7530	protein_coding	monocarboxylate transporter 14%2C transcript variant X1	MFS_1
novel.255	344.78	149.158	43.51	22.8625	18.4593	65.7786	179.149	35.7001	2.3267	0.00067601	0.00562508	-	NC_037644.1	13327408	13331371	+	2401	-	-	-
409394	1802.67	1465.45	1718.22	1086.47	1066.95	1181.02	1662.11	1111.48	0.580648	0.000679018	0.0056404	LOC409394	NC_037641.1	5411233	5415352	+	3673	protein_coding	NEDD8-activating enzyme E1 catalytic subunit%2C transcript variant X1	-
406077	299.113	266.742	290.067	128.229	175.363	188.366	285.307	163.986	0.798681	0.000683864	0.00566605	Antp	NC_037653.1	3881429	4037081	+	13463	protein_coding	homeotic protein antennapedia%2C transcript variant X3	-
410022	11664.3	10780.7	8966.47	4064.55	5860.83	7256.57	10470.5	5727.32	0.870358	0.000687886	0.00568963	LOC410022	NC_037638.1	15726344	15729053	+	1747	protein_coding	mitochondrial-processing peptidase subunit beta	-
408478	2776.5	3769.23	2374.28	1238.55	1945.61	790.34	2973.34	1324.83	1.16604	0.000690249	0.00570429	LOC408478	NC_037651.1	9291450	9302973	+	4026	protein_coding	facilitated trehalose transporter Tret1%2C transcript variant X1	Sugar_tr
412678	2914.64	3051.75	2475.8	1238.55	2034.22	1567.72	2814.07	1613.5	0.802199	0.000691298	0.00570808	LOC412678	NC_037639.1	6943729	6946494	+	1540	protein_coding	putative tricarboxylate transport protein%2C mitochondrial	Mito_carr
726676	107.316	97.987	108.348	53.6772	58.1468	55.8121	104.55	55.8787	0.904089	0.000692935	0.00571672	cad	NC_037638.1	7941395	7951326	-	1077	protein_coding	homeotic protein caudal	Homeobox
724164	784.317	874.262	834.368	417.489	383.954	617.92	830.982	473.121	0.813009	0.000699839	0.00576384	LOC724164	NC_037640.1	1869787	1870761	+	831	protein_coding	39S ribosomal protein L30%2C mitochondrial	-
408750	748.925	777.364	1263.5	469.178	538.089	507.292	929.928	504.853	0.882178	0.000702991	0.00578487	LOC408750	NC_037640.1	5284749	5287139	-	1632	protein_coding	pre-mRNA-processing factor 19	-
410459	696.409	524.775	295.185	283.296	205.821	149.497	505.456	212.871	1.24647	0.000706434	0.00580826	LOC410459	NC_037650.1	6601727	6603603	+	1209	protein_coding	cyclin-H	-
410355	647.318	547.639	706.397	355.86	423.641	414.604	633.785	398.035	0.671616	0.000708705	0.00581895	LOC410355	NC_037649.1	2054609	2056686	+	1319	protein_coding	translation initiation factor eIF-2B subunit beta	-
725718	10143.6	12114.5	11496	7742.43	7644.92	8125.65	11251.4	7837.67	0.521635	0.000708938	0.00581895	LOC725718	NC_037639.1	13316266	13321732	+	1471	protein_coding	cofilin/actin-depolymerizing factor homolog	Cofilin_ADF
406093	1478.44	524.775	256.794	143.139	49.8401	18.9363	753.337	70.6385	3.41476	0.000711221	0.00583274	LOC406093	NC_037643.1	15024551	15025504	+	349	protein_coding	apisimin	-
409699	2439.72	2783.92	3585.73	1720.65	1617.04	1986.31	2936.46	1774.67	0.726883	0.000715192	0.00585041	LOC409699	NC_037647.1	5337866	5342906	+	1634	protein_coding	26S proteasome non-ATPase regulatory subunit 1-like	-
412795	868.799	919.989	720.047	486.076	540.858	295.007	836.279	440.647	0.92364	0.000718892	0.00587075	LOC412795	NC_037652.1	8088731	8201178	-	8777	protein_coding	cadherin-99C%2C transcript variant X1	-
100577833	1159.92	654.336	830.955	356.854	386.723	575.064	881.737	439.547	1.00423	0.00072761	0.00592693	LOC100577833	NC_037638.1	15181107	15182799	+	1083	protein_coding	histone H1.2	-
107964762	389.304	458.362	615.112	256.458	248.278	97.6712	487.592	200.802	1.28018	0.000730667	0.00593572	LOC107964762	NC_037644.1	7407877	7411198	-	3322	protein_coding	transcription activator MSS11	-
409294	18481.1	18496.7	17967.1	10987.9	12718.5	13844.4	18314.9	12516.9	0.549133	0.000731026	0.00593572	LOC409294	NC_037651.1	5387004	5388561	-	610	protein_coding	60S ribosomal protein L23	-
726923	262.581	326.623	360.877	157.055	138.445	216.272	316.694	170.591	0.89461	0.000731145	0.00593572	LOC726923	NC_037648.1	408426	414912	-	950	protein_coding	DNA polymerase epsilon subunit 3%2C transcript variant X3	-
409870	10522.6	9987.05	7346.36	3539.71	3381.75	6640.65	9285.35	4520.7	1.0384	0.000774743	0.00626861	LOC409870	NC_037648.1	15516698	15518772	+	1405	protein_coding	minor histocompatibility antigen H13	-
411510	481.778	349.487	451.309	267.392	240.894	270.091	427.525	259.459	0.721015	0.000778892	0.00629691	LOC411510	NC_037649.1	8585427	8587177	-	1234	protein_coding	DNA-directed RNA polymerases I and III subunit RPAC1	RNA_pol_A_bac
724239	53.6578	436.587	88.7262	26.8386	46.1483	48.8356	192.99	40.6075	2.24767	0.000787917	0.00635924	LOC724239	NC_037638.1	22720414	22725817	+	1959	protein_coding	kynurenine/alpha-aminoadipate aminotransferase%2C mitochondrial	Aminotran_1_2
413649	114.165	154.602	195.368	65.6054	91.3736	66.7752	154.712	74.5847	1.05469	0.000790022	0.00636545	LOC413649	NC_037638.1	14997727	14999541	+	1404	protein_coding	rRNA-processing protein FCF1 homolog	-
410348	736.367	727.281	815.599	560.628	470.712	472.41	759.749	501.25	0.600693	0.000790134	0.00636545	LOC410348	NC_037648.1	13290858	13299843	-	4481	protein_coding	katanin p80 WD40 repeat-containing subunit B1%2C transcript variant X2	-
726120	2854.14	3290.19	2678.85	1432.38	1777.63	2137.8	2941.06	1782.61	0.722256	0.000793416	0.00638231	LOC726120	NC_037647.1	8325656	8326502	+	438	protein_coding	ATP synthase-coupling factor 6%2C mitochondrial	-
102654211	6.84993	74.0346	60.5727	1.98804	6.46076	10.9631	47.1524	6.47063	2.86805	0.000803632	0.00643121	LOC102654211	NC_037649.1	5153582	5163939	-	1438	protein_coding	acyl-CoA Delta(11) desaturase%2C transcript variant X2	-
724241	327.655	332.067	364.289	146.121	158.75	247.168	341.337	184.013	0.892432	0.000804364	0.00643121	LOC724241	NC_037647.1	7068054	7068998	-	526	protein_coding	N-alpha-acetyltransferase 38-B%2C NatC auxiliary subunit	LSM
725290	5244.76	3801.9	3631.8	2276.31	2950.72	2088.97	4226.15	2438.67	0.793048	0.000804559	0.00643121	LOC725290	NC_037650.1	3734878	3756655	+	9268	protein_coding	transcription factor CP2-like protein 1%2C transcript variant X5	CP2
409015	9487.15	8370.27	8336.85	4750.43	5749.15	6452.28	8731.42	5650.62	0.627771	0.000804816	0.00643121	LOC409015	NC_037646.1	8365846	8372240	+	2134	protein_coding	probable elongation factor 1-delta%2C transcript variant X1	-
551296	759.2	749.056	1173.06	445.322	574.085	464.437	893.773	494.614	0.854313	0.000805802	0.00643377	LOC551296	NC_037645.1	10470187	10472431	-	1601	protein_coding	UPF0160 protein MYG1%2C mitochondrial%2C transcript variant X2	-
409103	1215.86	1223.75	1202.92	764.402	886.97	869.075	1214.18	840.149	0.531091	0.000810402	0.00646516	LOC409103	NC_037638.1	10871906	10874075	-	1739	protein_coding	protoheme IX farnesyltransferase%2C mitochondrial	UbiA
412034	237.464	295.05	267.032	186.876	121.831	131.557	266.515	146.755	0.861839	0.000813675	0.00648593	LOC412034	NC_037647.1	10293652	10302012	-	3837	protein_coding	DNA helicase MCM8	MCM
725625	102.749	135.004	205.606	60.6353	75.6832	66.7752	147.786	67.6979	1.13013	0.000820235	0.00653283	LOC725625	NC_037639.1	6688745	6735060	-	7540	protein_coding	uncharacterized LOC725625	-
408675	1065.16	923.255	1236.2	617.287	539.935	767.417	1074.87	641.546	0.745236	0.000825054	0.0065658	LOC408675	NC_037639.1	14641367	14642910	-	1174	protein_coding	probable 39S ribosomal protein L24%2C mitochondrial	KOW
552746	541.144	545.461	644.118	360.83	372.878	400.651	576.908	378.12	0.610646	0.000828499	0.00658238	LOC552746	NC_037648.1	15663488	15665533	-	1272	protein_coding	17-beta-hydroxysteroid dehydrogenase 13%2C transcript variant X2	adh_short
408354	4108.81	4763.26	5057.39	2567.56	3494.35	2496.6	4643.16	2852.83	0.702712	0.000829297	0.00658331	LOC408354	NC_037648.1	12447016	12496655	+	4913	protein_coding	nuclear factor of activated T-cells 5%2C transcript variant X2	RHD
409780	851.674	889.504	1063.86	619.275	594.39	641.839	935.013	618.502	0.597145	0.000848481	0.00672456	LOC409780	NC_037638.1	3291485	3749589	-	7264	protein_coding	CUGBP Elav-like family member 2%2C transcript variant X2	RRM_1
411457	550.277	813.292	561.364	322.063	431.948	312.947	641.645	355.652	0.850504	0.000854847	0.00676946	LOC411457	NC_037648.1	14406508	14414597	+	3570	protein_coding	galactosylgalactosylxylosylprotein 3-beta-glucuronosyltransferase P%2C transcript variant X5	-
novel.434	173.531	80.5671	180.012	65.6054	63.6846	56.8088	144.703	62.0329	1.22353	0.000860107	0.00680035	-	NC_037650.1	11109432	11115102	-	3407	-	-	-
410990	398.437	356.02	437.659	254.469	239.971	268.098	397.372	254.179	0.646022	0.000860154	0.00680035	LOC410990	NC_037641.1	12088508	12090673	-	2166	protein_coding	nucleolar protein 9	-
novel.357	31.9663	43.5498	14.5033	0.994021	5.53779	8.96981	30.0065	5.16721	2.53119	0.000863039	0.00681758	-	NC_037648.1	13282936	13283890	+	864	-	-	-
550915	1656.54	1541.66	2010.84	652.078	675.611	1268.73	1736.35	865.473	1.00481	0.000868425	0.00685454	LOC550915	NC_037652.1	1546047	1552546	+	1764	protein_coding	sideroflexin-2	-
726295	16105.3	16587	15361.6	7997.9	9880.35	12073.4	16018	9983.87	0.682013	0.000875881	0.00689918	LOC726295	NC_037639.1	6975591	6976459	-	511	protein_coding	40S ribosomal protein S27%2C transcript variant X1	-
724369	20417.3	20228.9	18608.6	13460	14665	14502.2	19751.6	14209.1	0.475127	0.00088314	0.00692964	LOC724369	NC_037642.1	8841745	8842956	+	435	protein_coding	40S ribosomal protein S25	-
novel.122	42.2412	17.4199	1.70627	0	1.84593	0	20.4558	0.61531	5.00158	0.000885108	0.00692964	-	NC_037640.1	6526225	6526841	-	311	-	-	-
551125	16709.3	15056.3	14830.9	8621.15	10901.1	11220.2	15532.1	10247.5	0.599956	0.00088707	0.00693938	LOC551125	NC_037640.1	10171859	10173007	+	557	protein_coding	40S ribosomal protein S15Aa	-
552010	341.355	267.831	338.695	213.715	178.132	180.393	315.96	190.747	0.728993	0.000894463	0.00698592	LOC552010	NC_037645.1	11927370	11930704	+	1683	protein_coding	60S ribosomal export protein NMD3	-
409765	336.788	361.463	366.849	229.619	248.278	210.292	355.033	229.396	0.630201	0.000908	0.0070802	LOC409765	NC_037648.1	16035887	16037620	+	1571	protein_coding	actin-related protein 6%2C transcript variant X1	Actin
724594	939.582	759.944	957.219	543.73	395.952	609.947	885.582	516.543	0.778354	0.000908849	0.00708111	LOC724594	NC_037651.1	8149838	8184090	+	4465	protein_coding	ADP-ribosylation factor-like protein 4C	Arf
726264	1573.2	1538.4	1649.11	963.207	1143.55	1151.13	1586.9	1085.96	0.54731	0.000920209	0.00714704	LOC726264	NC_037638.1	11701379	11703257	-	1260	protein_coding	mitochondrial carrier homolog 2%2C transcript variant X1	Mito_carr
552258	1472.73	1541.66	1842.78	848.894	1112.17	1094.32	1619.06	1018.46	0.669041	0.000920268	0.00714704	LOC552258	NC_037652.1	2847727	2856401	+	4228	protein_coding	hippocampus abundant transcript 1 protein%2C transcript variant X3	MFS_1
550808	521.736	401.747	527.239	250.493	311.962	314.94	483.574	292.465	0.725764	0.000930577	0.00720396	LOC550808	NC_037640.1	8380017	8389702	-	2747	protein_coding	WD repeat-containing protein 75	-
100578557	57.0827	94.7208	25.5941	4.97011	17.5363	18.9363	59.1325	13.8142	2.09162	0.00093227	0.00721129	LOC100578557	NC_037641.1	3467018	3480468	-	3828	protein_coding	solute carrier family 46 member 3%2C transcript variant X2	MFS_1
724744	2630.37	3206.35	2759.04	1257.44	1378.91	2152.75	2865.26	1596.37	0.843924	0.000938554	0.0072541	LOC724744	NC_037642.1	12769087	12769978	-	636	protein_coding	28S ribosomal protein S14%2C mitochondrial	Ribosomal_S14
724704	1368.84	1106.16	2238.63	341.943	464.252	998.638	1571.21	601.611	1.38535	0.000939508	0.00725568	LOC724704	NC_037644.1	3533455	3613981	-	7941	protein_coding	cytoplasmic polyadenylation element-binding protein 2%2C transcript variant X1	-
413141	6937.83	3316.32	4019.98	1530.79	1201.7	3028.8	4758.04	1920.43	1.30894	0.000942211	0.00727074	LOC413141	NC_037641.1	11968229	11975606	-	2528	protein_coding	oxidative stress-induced growth inhibitor 2%2C transcript variant X2	-
408909	1923.69	2248.26	2014.26	943.326	1255.23	1496.96	2062.07	1231.84	0.743255	0.000943651	0.00727605	LOC408909	NC_037644.1	13626835	13628255	-	964	protein_coding	NADH-quinone oxidoreductase subunit B 2%2C transcript variant X1	-
409688	541.144	487.758	545.154	337.967	345.189	372.745	524.685	351.967	0.576431	0.000944578	0.00727739	LOC409688	NC_037653.1	1303168	1305494	+	1950	protein_coding	cleavage stimulation factor subunit 1	-
550978	736.367	532.396	602.315	385.68	381.185	408.625	623.693	391.83	0.670227	0.000947105	0.00729105	LOC550978	NC_037640.1	674021	675479	-	1087	protein_coding	non-structural maintenance of chromosomes element 3 homolog	MAGE
551751	296.83	266.742	301.157	200.792	134.753	169.43	288.243	168.325	0.777419	0.000966749	0.00741865	LOC551751	NC_037645.1	6745315	6747223	-	1158	protein_coding	gem-associated protein 2	-
102653614	141.565	154.602	201.34	85.4858	95.9884	93.6846	165.836	91.7196	0.857762	0.000973454	0.00745826	LOC102653614	NC_037638.1	24976696	25011066	-	3893	protein_coding	probable RNA methyltransferase CG11342%2C transcript variant X3	-
551723	972.69	916.723	987.079	622.257	454.099	682.702	958.831	586.353	0.710002	0.000975848	0.00745988	LOC551723	NC_037640.1	568120	569258	+	637	protein_coding	peptidyl-prolyl cis-trans isomerase-like 3	Pro_isomerase
726816	801.441	634.738	964.045	367.788	500.247	503.306	800.075	457.114	0.808104	0.00097598	0.00745988	LOC726816	NC_037653.1	1629520	1631907	-	1590	protein_coding	ruvB-like 2	-
411307	1955.65	2112.16	1825.71	1052.67	1501.66	1028.54	1964.51	1194.29	0.717678	0.000977158	0.00746299	LOC411307	NC_037646.1	10893442	10895515	-	1579	protein_coding	mitochondrial enolase superfamily member 1	MR_MLE_N
410427	1526.39	1540.57	1922.97	1107.34	1074.33	1145.15	1663.31	1108.94	0.585448	0.000989529	0.00753506	LOC410427	NC_037650.1	3880197	3958542	-	7466	protein_coding	serine/threonine-protein kinase 26%2C transcript variant X4	-
100577976	139.282	118.673	156.977	60.6353	65.5306	89.6981	138.311	71.9546	0.945469	0.000989712	0.00753506	LOC100577976	NC_037641.1	6766824	6767711	+	888	protein_coding	GSK3-beta interaction protein	-
411744	7032.59	7399.11	9110.65	4695.76	5293.21	5505.47	7847.45	5164.81	0.603612	0.000993002	0.00755416	LOC411744	NC_037646.1	11444728	11474409	+	9656	protein_coding	spectrin beta chain%2C transcript variant X1	CH
102655712	441.82	583.567	409.506	218.685	170.749	330.886	478.298	240.107	0.994415	0.00100114	0.00760409	LOC102655712	NC_037647.1	8116841	8125575	-	6398	protein_coding	chromatin modification-related protein eaf-1	-
409890	58629.7	54562.4	66180.4	22620	28931.3	44391.6	59790.8	31980.9	0.902718	0.0010029	0.00761152	LOC409890	NC_037653.1	5146775	5149619	-	1701	protein_coding	peptidyl-prolyl cis-trans isomerase	Pro_isomerase
551330	31661.5	28462	28542.5	18421.2	21584.5	21670.1	29555.3	20558.6	0.523663	0.00100446	0.00761734	LOC551330	NC_037639.1	13380761	13382153	-	863	protein_coding	40S ribosomal protein S3	-
410557	4446.74	4384.37	3591.71	2145.1	2746.75	2932.13	4140.94	2607.99	0.66686	0.001006	0.00762306	LOC410557	NC_037651.1	9962901	9964072	+	702	protein_coding	ATP synthase subunit d%2C mitochondrial	-
410295	348.205	329.89	380.499	175.942	240.894	227.235	352.864	214.69	0.717097	0.00100738	0.00762751	LOC410295	NC_037648.1	1461409	1463389	+	1624	protein_coding	queuine tRNA-ribosyltransferase accessory subunit 2%2C transcript variant X1	TGT
551828	726.092	787.162	958.073	527.825	567.624	482.376	823.776	525.942	0.648103	0.00100905	0.00763416	osp	NC_037640.1	5500727	5686185	+	11055	protein_coding	outspread	PH
724142	15666.9	16522.8	15150	8083.38	9409.63	12128.2	15779.9	9873.73	0.676418	0.00101708	0.00768661	LOC724142	NC_037649.1	5229118	5230423	-	797	protein_coding	60S ribosomal protein L24%2C transcript variant X1	-
408803	682.709	763.21	804.508	519.873	525.167	443.507	750.142	496.183	0.596712	0.00101757	0.00768661	LOC408803	NC_037641.1	9061799	9309120	-	6664	protein_coding	tensin-1%2C transcript variant X4	SH2
412627	271.714	250.411	330.164	171.966	174.44	176.406	284.096	174.271	0.707176	0.00102743	0.00773694	LOC412627	NC_037647.1	7744203	7745983	-	1296	protein_coding	cleavage and polyadenylation specificity factor subunit 4	zf-CCCH
107964502	162.115	146.981	183.424	76.5396	72.9143	111.624	164.173	87.0261	0.918407	0.00103198	0.00775913	LOC107964502	NC_037638.1	11124497	11125070	+	467	protein_coding	uncharacterized LOC107964502	-
724534	3237.73	2960.3	2188.3	1342.92	1383.53	2004.25	2795.44	1576.9	0.825822	0.00104899	0.00786861	Slc35b1	NC_037638.1	14058518	14061060	-	2160	protein_coding	solute carrier family 35%2C member B1	-
408359	893.915	1191.09	1433.27	710.725	739.295	632.87	1172.76	694.297	0.75689	0.0010543	0.00789624	LOC408359	NC_037648.1	12885954	12905506	+	5319	protein_coding	MAGUK p55 subfamily member 6%2C transcript variant X3	PDZ
100576666	187.231	139.359	167.215	79.5217	108.91	71.7584	164.602	86.73	0.922463	0.00106081	0.00793268	LOC100576666	NC_037643.1	9032532	9048236	-	3900	protein_coding	proton channel OtopLc	-
413746	246.597	260.21	350.639	157.055	183.67	155.477	285.816	165.401	0.791083	0.00106255	0.00793959	LOC413746	NC_037643.1	13355761	13357848	-	963	protein_coding	adrenodoxin	Fer2
408284	4648.82	4145.94	6625.46	2592.41	3444.51	2842.43	5140.07	2959.78	0.796413	0.00106687	0.00796033	LOC408284	NC_037647.1	10211681	10213727	-	1491	protein_coding	mitochondrial import receptor subunit TOM40 homolog 1	-
409778	597.085	733.814	1203.78	441.345	433.794	442.51	844.892	439.217	0.944954	0.0010678	0.00796033	LOC409778	NC_037649.1	5021060	5135047	+	5323	protein_coding	storkhead-box protein 2%2C transcript variant X1	-
100577393	1562.92	1555.82	1610.72	992.033	1122.33	1181.02	1576.49	1098.46	0.521291	0.0010804	0.00804187	LOC100577393	NC_037643.1	3804323	3960476	-	8808	protein_coding	epidermal growth factor receptor-like%2C transcript variant X3	Pkinase_Tyr
100577408	490.911	395.214	261.913	243.535	157.827	117.604	382.68	172.989	1.14433	0.00108287	0.00804587	LOC100577408	NC_037645.1	5097232	5108923	+	2803	protein_coding	leukocyte elastase inhibitor%2C transcript variant X3	Serpin
410758	476.07	469.249	630.468	231.607	282.427	367.762	525.262	293.932	0.838694	0.00108306	0.00804587	LOC410758	NC_037638.1	2674336	3119466	+	10694	protein_coding	mRNA decay activator protein ZFP36L3%2C transcript variant X14	-
725961	1718.19	1565.61	1968.19	1008.93	1035.57	1306.6	1750.66	1117.03	0.648609	0.00108343	0.00804587	LOC725961	NC_037641.1	9054430	9055570	+	753	protein_coding	coiled-coil domain-containing protein 58	-
725082	53.6578	50.0823	92.9919	32.8027	16.6134	22.9228	65.5773	24.113	1.45236	0.00108969	0.00807989	LOC725082	NC_037647.1	9150611	9158324	+	3292	protein_coding	uncharacterized LOC725082%2C transcript variant X2	-
413394	2898.66	2545.49	1996.34	1006.94	883.278	1797.95	2480.16	1229.39	1.01246	0.00109849	0.00813892	LOC413394	NC_037640.1	2328324	2330045	+	1113	protein_coding	vesicle-trafficking protein SEC22b-B	-
724188	17543.8	19598.5	13802	6194.74	4275.18	11937.8	16981.4	7469.24	1.18493	0.00110448	0.00817702	LOC724188	NC_037640.1	8045292	8046498	+	1045	protein_coding	protein transport protein Sec61 subunit beta	-
726018	430.404	433.32	606.58	292.242	311.039	285.041	490.101	296.107	0.728533	0.00110889	0.00820338	LOC726018	NC_037648.1	13987143	13990427	-	2158	protein_coding	replication factor C subunit 4-like	AAA
726762	869.941	644.537	622.79	471.166	438.409	405.635	712.422	438.403	0.699617	0.00112094	0.00827987	LOC726762	NC_037644.1	657982	664929	+	2235	protein_coding	facilitated trehalose transporter Tret1	-
413562	1349.44	901.481	719.194	398.603	403.336	652.803	990.037	484.914	1.02936	0.00112499	0.0082971	LOC413562	NC_037638.1	16532591	16656619	+	9215	protein_coding	rho guanine nucleotide exchange factor 17%2C transcript variant X3	RhoGEF
552109	10730.4	10140.6	9919.42	6562.53	7115.14	7925.32	10263.5	7201	0.511226	0.00112939	0.00832323	LOC552109	NC_037652.1	3760564	3768104	+	4231	protein_coding	cytosol aminopeptidase%2C transcript variant X3	-
726789	14273	14226.6	13351.6	9533.66	10747	9947.52	13950.4	10076.1	0.469333	0.00113329	0.00834561	LOC726789	NC_037649.1	9162628	9163668	-	487	protein_coding	40S ribosomal protein S26	-
100577363	424.695	617.318	488.847	205.762	302.733	329.89	510.287	279.462	0.868457	0.00113638	0.008362	LOC100577363	NC_037645.1	12643483	12656207	+	1913	protein_coding	uncharacterized LOC100577363%2C transcript variant X2	-
725352	542.286	617.318	802.802	413.513	387.646	400.651	654.135	400.603	0.708859	0.00114107	0.00839015	LOC725352	NC_037648.1	15935398	15936256	-	626	protein_coding	U6 snRNA-associated Sm-like protein LSm7%2C transcript variant X1	LSM
411538	834.549	893.859	973.429	646.114	623.925	530.215	900.613	600.085	0.586163	0.00116856	0.00857919	LOC411538	NC_037649.1	3072579	3074233	-	1495	protein_coding	pre-mRNA-splicing factor RBM22	RRM_1
412667	657.593	347.31	333.576	249.499	173.518	218.265	446.16	213.761	1.06075	0.00116955	0.00857996	LOC412667	NC_037640.1	1080559	1269299	-	4997	protein_coding	proto-oncogene tyrosine-protein kinase receptor Ret%2C transcript variant X4	Pkinase_Tyr
552244	1892.86	1351.13	1809.5	698.797	790.981	1228.86	1684.5	906.214	0.89455	0.00117228	0.00859347	LOC552244	NC_037643.1	15674499	15745022	+	4330	protein_coding	probable pathogenesis-related protein CaO19.6200%2C transcript variant X1	SCP
551992	1718.19	1497.02	2653.26	871.757	1205.39	1099.3	1956.16	1058.82	0.885902	0.00117739	0.00861788	LOC551992	NC_037639.1	9667044	9669172	-	1191	protein_coding	rRNA 2'-O-methyltransferase fibrillarin%2C transcript variant X1	-
100577174	307.105	239.524	341.255	152.085	196.592	166.44	295.961	171.706	0.786155	0.00117922	0.00861827	LOC100577174	NC_037640.1	4705547	4770825	-	8682	protein_coding	ras-responsive element-binding protein 1%2C transcript variant X2	-
552559	399.579	418.078	517.854	300.194	258.43	283.047	445.17	280.557	0.667959	0.00118274	0.00862435	LOC552559	NC_037642.1	11952748	11953895	-	732	protein_coding	probable small nuclear ribonucleoprotein Sm D1	LSM
100578041	2983.14	4339.74	2538.08	1991.02	1841.32	1046.48	3286.99	1626.27	1.01505	0.00118772	0.00865416	LOC100578041	NC_037643.1	5527020	5529783	-	1462	protein_coding	uncharacterized LOC100578041%2C transcript variant X1	-
410379	992.098	1196.53	1190.98	616.293	802.98	756.454	1126.54	725.242	0.635487	0.00120652	0.00877127	LOC410379	NC_037649.1	11131317	11160765	-	8232	protein_coding	uncharacterized LOC410379	-
409613	6892.17	5795.39	5214.37	4078.47	3690.94	4160	5967.31	3976.47	0.58549	0.00121915	0.00883598	LOC409613	NC_037652.1	8203953	8206193	+	1377	protein_coding	GTP-binding protein SAR1%2C transcript variant X4	Arf
412328	952.14	880.794	944.422	504.963	582.391	700.642	925.786	595.999	0.635491	0.00121917	0.00883598	LOC412328	NC_037647.1	10322892	10323766	-	698	protein_coding	NADH dehydrogenase [ubiquinone] iron-sulfur protein 6%2C mitochondrial	-
552051	7692.47	6884.13	5599.14	3483.05	3576.49	4998.18	6725.25	4019.24	0.742602	0.00122103	0.00883696	LOC552051	NC_037645.1	7278691	7281629	+	1891	protein_coding	dolichyl-diphosphooligosaccharide--protein glycosyltransferase 48 kDa subunit	-
410891	448.67	242.79	325.898	169.978	133.83	208.299	339.12	170.702	0.990404	0.00122701	0.00887358	LOC410891	NC_037639.1	6595967	6607710	-	5483	protein_coding	protein dispatched	-
726672	4324.59	1702.8	2689.94	1696.79	1229.39	933.856	2905.77	1286.68	1.1752	0.00124237	0.00897794	LOC726672	NC_037643.1	2674934	2676864	+	1931	protein_coding	uncharacterized LOC726672	-
726204	2758.24	2463.83	2119.19	1610.31	1585.65	979.702	2447.09	1391.89	0.813773	0.00124494	0.0089898	LOC726204	NC_037649.1	11340007	11374637	-	3830	protein_coding	transcription factor cwo%2C transcript variant X2	HLH
412064	409.854	484.491	469.225	285.284	283.35	324.906	454.524	297.847	0.610547	0.00125064	0.00901747	LOC412064	NC_037653.1	2560015	2561888	-	1271	protein_coding	probable U2 small nuclear ribonucleoprotein A'%2C transcript variant X2	-
550651	25068.4	26332.4	25006.3	15410.3	20110.5	15814.8	25469	17111.9	0.573729	0.00125367	0.00903256	LOC550651	NC_037647.1	9420650	9422958	+	961	protein_coding	40S ribosomal protein S4	Ribosomal_S4e
408352	1795.82	1716.95	1684.95	1120.26	1168.47	1335.5	1732.57	1208.08	0.520129	0.00126092	0.00907803	LOC408352	NC_037648.1	12170298	12171881	+	1055	protein_coding	elongation factor Ts%2C mitochondrial	-
408626	1358.57	1170.4	1367.58	674.941	869.434	934.853	1298.85	826.409	0.652367	0.00126253	0.00908287	LOC408626	NC_037638.1	1154365	1171005	+	2554	protein_coding	poly(A)-specific ribonuclease PARN%2C transcript variant X1	CAF1
406108	9892.44	8773.1	5470.31	4641.09	4900.95	4053.36	8045.28	4531.8	0.827937	0.00129732	0.00930855	Tspan6	NC_037649.1	7357756	7366851	+	1763	protein_coding	tetraspanin 6	Tetraspannin
552097	901.907	938.498	1020.35	411.525	406.105	727.551	953.586	515.06	0.889071	0.0013063	0.00935363	LOC552097	NC_037647.1	10214141	10215402	-	750	protein_coding	39S ribosomal protein L14%2C mitochondrial	-
724462	12.5582	15.2424	29.0067	0.994021	5.53779	1.99329	18.9358	2.8417	2.72856	0.00130874	0.00935363	LOC724462	NC_037649.1	797287	805514	+	3064	protein_coding	uncharacterized LOC724462	-
408547	109.599	45.7273	15.3565	13.9163	13.8445	8.96981	56.8942	12.2435	2.20911	0.00130887	0.00935363	LOC408547	NC_037652.1	2870207	2971595	+	4235	protein_coding	toxin 3FTx-Lei1	-
727237	2620.1	3453.5	3695.79	1010.92	1852.39	2108.9	3256.46	1657.4	0.974439	0.0013245	0.00944439	LOC727237	NC_037649.1	2451558	2485634	-	1880	protein_coding	carbonic anhydrase 2	-
410809	627.91	771.92	900.059	367.788	431.025	543.172	766.63	447.328	0.778033	0.00132713	0.00945618	LOC410809	NC_037639.1	15506104	15509937	+	2482	protein_coding	protein pygopus	PHD
551353	12819.6	10435.6	6450.57	4695.76	2860.27	6206.11	9901.94	4587.38	1.11002	0.00132886	0.00946149	LOC551353	NC_037647.1	248511	250355	+	1255	protein_coding	translocon-associated protein subunit alpha	-
552485	1809.52	1420.81	1907.61	1033.78	1196.16	1117.24	1712.65	1115.73	0.618414	0.00133416	0.00949224	LOC552485	NC_037651.1	8413989	8417139	-	2083	protein_coding	glycylpeptide N-tetradecanoyltransferase 1	-
409550	4409.07	3513.38	3677.87	2410.5	2811.35	2609.22	3866.77	2610.36	0.566733	0.00133645	0.00950156	LOC409550	NC_037652.1	9296545	9299331	-	2046	protein_coding	eukaryotic translation initiation factor 3 subunit D	-
724489	273.997	378.883	304.57	182.9	171.672	216.272	319.15	190.281	0.746427	0.00134079	0.00952543	LOC724489	NC_037640.1	3235887	3236911	+	473	protein_coding	ubiquitin-like protein 5%2C transcript variant X2	-
411564	1694.22	1842.16	488.847	727.624	229.818	297	1341.74	418.147	1.6819	0.0013434	0.00953694	LOC411564	NC_037640.1	3127999	3137002	+	3063	protein_coding	nose resistant to fluoxetine protein 6%2C transcript variant X2	-
102654737	815.141	703.329	737.963	488.064	529.782	532.209	752.145	516.685	0.541369	0.00135152	0.00958051	LOC102654737	NC_037652.1	8209961	8211902	+	1308	protein_coding	peptide deformylase%2C mitochondrial	Pep_deformylase
408364	39.9579	178.554	83.6074	19.8804	42.4564	23.9195	100.706	28.7521	1.80585	0.00136853	0.00965861	LOC408364	NC_037648.1	12975188	12988996	-	1392	protein_coding	uncharacterized LOC408364%2C transcript variant X1	-
552255	3472.91	2752.35	4362.94	1795.2	1329.07	2462.71	3529.4	1862.33	0.922536	0.00137532	0.00968725	Br-c	NC_037650.1	3298951	3357708	-	16159	protein_coding	broad-complex%2C transcript variant X12	-
413313	529.728	451.829	752.467	334.985	315.654	348.826	578.008	333.155	0.796447	0.00137559	0.00968725	LOC413313	NC_037640.1	5431442	5432786	+	1248	protein_coding	exosome complex component RRP40	-
100642169	108.457	29.3961	18.769	14.9103	1.84593	8.96981	52.2074	8.57535	2.60755	0.00138454	0.00974316	Or51	NC_037639.1	10121395	10123538	+	1649	protein_coding	odorant receptor 51%2C transcript variant X1	-
552727	1820.94	1611.34	2330.77	957.243	1394.6	1023.55	1921.02	1125.13	0.771917	0.00139291	0.00979498	LOC552727	NC_037641.1	12710100	12712753	+	982	protein_coding	mitochondrial import inner membrane translocase subunit Tim23%2C transcript variant X2	-
107965485	76.4908	141.537	94.6982	48.707	47.0712	51.8255	104.242	49.2013	1.08305	0.00139497	0.00980231	LOC107965485	NC_037651.1	9792960	9801921	-	8701	protein_coding	uncharacterized LOC107965485	-
413551	2052.69	2199.26	1352.22	1278.31	979.266	823.229	1868.06	1026.94	0.862873	0.00139726	0.00980773	LOC413551	NC_037638.1	25243083	25250202	+	2048	protein_coding	mitochondrial coenzyme A transporter SLC25A42%2C transcript variant X1	Mito_carr
726812	470.362	432.232	439.365	335.979	255.661	263.114	447.32	284.918	0.650898	0.00139938	0.00981112	LOC726812	NC_037639.1	2841257	2843970	+	1916	protein_coding	RNA polymerase I-specific transcription initiation factor RRN3	RRN3
552610	6083.88	5857.45	5261.29	1808.12	2446.78	4278.6	5734.21	2844.5	1.01142	0.00140028	0.00981112	LOC552610	NC_037653.1	5218063	5219294	-	586	protein_coding	cytochrome c oxidase subunit 5B%2C mitochondrial	-
409022	513.745	473.604	509.323	262.422	311.962	369.755	498.89	314.713	0.664844	0.00141337	0.00988724	LOC409022	NC_037646.1	5540266	5547250	-	1655	protein_coding	fruitless	BTB
408372	1053.75	1218.31	2005.72	709.731	718.067	864.091	1425.93	763.963	0.90102	0.00141422	0.00988724	LOC408372	NC_037649.1	1709289	2029038	+	5433	protein_coding	poly(rC)-binding protein 3%2C transcript variant X2	KH_1
102655329	26421.3	30187.6	36550.1	18743.3	21337.1	21071.1	31053	20383.8	0.607335	0.00142182	0.00993324	LOC102655329	NC_037647.1	10017425	10036094	-	4922	protein_coding	14-3-3 protein zeta%2C transcript variant X5	-
413666	637.043	629.294	957.219	441.345	455.022	429.554	741.186	441.974	0.747074	0.00145452	0.0101335	LOC413666	NC_037648.1	11157983	11165366	+	3703	protein_coding	peroxisome biogenesis factor 1%2C transcript variant X1	AAA
102654841	10.2749	16.3312	9.3845	0	0	1.99329	11.9969	0.66443	4.20068	0.00145468	0.0101335	LOC102654841	NC_037644.1	8692263	8695056	-	1941	protein_coding	uncharacterized LOC102654841	-
novel.504	23.9747	35.9286	196.221	18.8864	10.1526	20.9295	85.3749	16.6562	2.36486	0.00146415	0.0101703	-	NW_020555813.1	1289	2032	+	744	-	-	-
409883	1148.5	1216.13	1551	657.048	860.204	889.007	1305.21	802.086	0.702906	0.00146417	0.0101703	LOC409883	NC_037641.1	7860111	7864269	+	2562	protein_coding	splicing factor 3A subunit 1	ubiquitin
725266	1263.81	1489.4	1320.66	876.727	805.749	1027.54	1357.96	903.339	0.588229	0.00146828	0.0101915	LOC725266	NC_037641.1	5864597	5866495	-	594	protein_coding	oligosaccharyltransferase complex subunit ostc-A	-
550992	1318.61	1421.9	1330.04	1006.94	928.503	983.689	1356.85	973.045	0.479712	0.00147148	0.0102064	LOC550992	NC_037638.1	25087375	25088764	-	1098	protein_coding	thioredoxin reductase-like selenoprotein T homolog CG3887	-
409709	18102.1	3149.74	2026.2	1072.55	133.83	508.289	7759.34	571.556	3.76298	0.00148103	0.0102653	LOC409709	NC_037643.1	15037182	15039633	+	1670	protein_coding	putative glucosylceramidase 4	Glyco_hydro_30
724654	614.21	364.729	172.334	183.894	63.6846	140.527	383.758	129.369	1.5683	0.00148387	0.0102776	LOC724654	NC_037642.1	12759076	12760360	-	633	protein_coding	cytochrome b5	-
100576540	9797.68	11736.7	17683	7904.46	7385.57	7175.84	13072.4	7488.62	0.803833	0.00148882	0.0103045	LOC100576540	NC_037638.1	2301297	2304129	+	1857	protein_coding	vacuolar protein sorting-associated protein 27	-
727473	980.681	765.388	585.252	466.196	420.872	477.393	777.107	454.82	0.771889	0.00149048	0.0103086	LOC727473	NC_037649.1	2271943	2272721	-	582	protein_coding	signal recognition particle 19 kDa protein	SRP19
726013	11247.6	11999.1	10555	7122.16	8713.72	7713.04	11267.2	7849.64	0.521375	0.00150928	0.0104237	LOC726013	NC_037645.1	3456318	3457139	+	553	protein_coding	40S ribosomal protein S20	Ribosomal_S10
100576480	13.6999	3.26623	5.11882	0	0	0	7.36164	0	5.35893	0.00152978	0.0105352	Or170	NC_037644.1	8688183	8690955	-	1574	protein_coding	odorant receptor 170	-
novel.220	66.216	58.7922	32.4192	23.8565	16.6134	17.9396	52.4758	19.4698	1.4246	0.00157078	0.0107792	-	NC_037643.1	15298297	15324959	+	1033	-	-	-
726913	1014.93	877.528	623.643	556.652	322.115	461.447	838.701	446.738	0.908389	0.00158767	0.0108874	LOC726913	NC_037648.1	12586489	12667091	-	8794	protein_coding	cytochrome b5%2C transcript variant X6	-
726691	421.271	432.232	314.807	226.637	56.3009	164.446	389.437	149.128	1.38541	0.00159816	0.0109515	CPF2	NC_037652.1	7840678	7842089	+	765	protein_coding	cuticular protein CPF2%2C transcript variant 1	-
411563	1521.83	1376.17	897.5	825.038	694.07	665.759	1265.17	728.289	0.796128	0.00161388	0.0110514	LOC411563	NC_037640.1	3136906	3140517	-	2320	protein_coding	myotubularin-related protein 2%2C transcript variant X1	GRAM
409628	7340.84	3350.07	2740.28	1627.21	1712.1	2521.51	4477.06	1953.61	1.1963	0.00162189	0.0110906	LOC409628	NC_037645.1	3955364	3987976	-	2902	protein_coding	neutral ceramidase%2C transcript variant X4	Ceramidase_alk
724533	1225	1241.17	1218.28	719.671	814.056	949.803	1228.15	827.843	0.569063	0.00163785	0.0111839	LOC724533	NC_037645.1	2206218	2207214	-	799	protein_coding	small nuclear ribonucleoprotein Sm D3	LSM
413817	821.991	278.719	579.28	293.236	151.366	246.171	559.997	230.258	1.28247	0.00166827	0.0113478	LOC413817	NC_037640.1	12559466	12573790	+	2239	protein_coding	inositol-trisphosphate 3-kinase homolog%2C transcript variant X2	-
726920	42.2412	177.465	37.538	22.8625	17.5363	25.9128	85.7482	22.1039	1.95465	0.00166933	0.0113478	LOC726920	NC_037638.1	12537912	12540839	+	870	protein_coding	uncharacterized LOC726920	-
100577081	1001.23	859.02	944.422	519.873	692.224	626.89	934.891	612.996	0.608633	0.00168209	0.0113978	LOC100577081	NC_037652.1	6954757	6956971	-	2157	protein_coding	dihydroorotate dehydrogenase (quinone)%2C mitochondrial	DHO_dh
409299	1422.5	1660.34	1771.11	963.207	1127.86	1164.08	1617.98	1085.05	0.57674	0.00168214	0.0113978	LOC409299	NC_037651.1	6005098	6012918	-	2143	protein_coding	adenylosuccinate synthetase	-
551042	1108.55	1110.52	1205.48	798.199	736.526	864.091	1141.52	799.606	0.514096	0.00168619	0.0114172	LOC551042	NC_037640.1	6252259	6253269	+	677	protein_coding	NADH dehydrogenase [ubiquinone] 1 alpha subcomplex subunit 6	-
726370	190.656	374.528	331.87	133.199	158.75	169.43	299.018	153.793	0.960249	0.00168835	0.0114238	LOC726370	NC_037650.1	2466373	2480425	+	4922	protein_coding	uncharacterized LOC726370%2C transcript variant X2	Homeobox
100577377	9178.9	7284.79	4728.94	4168.93	3690.02	1760.08	7064.21	3206.34	1.13951	0.00169227	0.0114424	LOC100577377	NC_037639.1	16026992	16030441	-	3103	protein_coding	uncharacterized LOC100577377	-
726510	494.336	557.437	689.335	337.967	340.574	407.628	580.369	362.056	0.68222	0.00169398	0.0114459	LOC726510	NC_037652.1	7797678	7818486	-	4061	protein_coding	M-phase inducer phosphatase 1%2C transcript variant X1	Rhodanese
408607	4095.11	4697.93	4535.28	3154.03	3377.13	2949.07	4442.77	3160.08	0.491513	0.00170311	0.0114954	LOC408607	NC_037638.1	26195974	26213112	+	5247	protein_coding	SEC23-interacting protein%2C transcript variant X1	-
413946	750.067	655.424	995.611	372.758	513.169	512.276	800.367	466.067	0.780791	0.0017103	0.011532	LOC413946	NC_037645.1	1836224	1884516	+	3875	protein_coding	myocyte-specific enhancer factor 2%2C transcript variant X6	SRF-TF
413928	804.866	833.978	821.571	315.105	380.262	628.883	820.139	441.417	0.893943	0.00171539	0.0115582	LOC413928	NC_037639.1	6330986	6332319	+	733	protein_coding	39S ribosomal protein L13%2C mitochondrial	-
413006	1505.84	1235.73	1380.38	800.187	966.345	989.669	1373.98	918.734	0.580514	0.00172348	0.0116021	LOC413006	NC_037645.1	7169245	7174014	+	2917	protein_coding	leucine-rich repeat flightless-interacting protein 2%2C transcript variant X1	-
100577533	315.097	289.606	350.639	153.079	164.288	236.205	318.447	184.524	0.788554	0.0017243	0.0116021	LOC100577533	NC_037638.1	22777471	22779045	-	1074	protein_coding	mitochondrial RNA pseudouridine synthase rpusd4	-
412505	3789.15	2978.81	2172.09	1544.71	1667.8	1968.37	2980.01	1726.96	0.786823	0.00177769	0.0119281	LOC412505	NC_037639.1	2554390	2561496	-	2971	protein_coding	translocation protein SEC63 homolog	Sec63
551078	1613.16	1535.13	1322.36	731.6	806.672	1150.13	1490.22	896.133	0.733589	0.00180136	0.0120535	LOC551078	NC_037652.1	9023033	9025082	+	1234	protein_coding	NADH-quinone oxidoreductase subunit I	-
411163	855.099	641.271	1058.74	407.549	500.247	562.108	851.704	489.968	0.798332	0.00180283	0.012055	LOC411163	NC_037643.1	9673802	9719257	+	3003	protein_coding	N-alpha-acetyltransferase 15%2C NatA auxiliary subunit	-
726027	319.663	327.712	388.177	245.523	209.513	209.295	345.184	221.444	0.642245	0.00180479	0.0120598	LOC726027	NC_037645.1	5884074	5885524	-	1178	protein_coding	ADP-ribosylation factor-like protein 1	Arf
novel.110	99.3239	52.2597	107.495	29.8206	34.1497	45.8457	86.3596	36.6053	1.24151	0.001846	0.0122757	-	NC_037640.1	12012292	12016627	+	3717	-	-	-
724965	472.645	587.922	590.371	378.722	370.109	345.836	550.313	364.889	0.59357	0.00186295	0.012363	LOC724965	NC_037652.1	9452670	9468801	-	904	protein_coding	dnaJ homolog subfamily C member 5%2C transcript variant X2	DnaJ
100577515	100.466	146.981	214.99	83.4978	74.7602	56.8088	154.146	71.6889	1.10817	0.00187158	0.0123988	LOC100577515	NC_037650.1	2496231	2500027	-	2649	protein_coding	uncharacterized LOC100577515	-
551870	10857.1	10506.4	9889.56	6840.86	6991.46	8244.25	10417.7	7358.86	0.501461	0.00187596	0.0124153	LOC551870	NC_037649.1	8842010	8843009	-	547	protein_coding	60S ribosomal protein L36%2C transcript variant X1	-
412193	4139.64	4314.7	4307.49	2963.18	3218.38	3234.11	4253.94	3138.56	0.438714	0.00188877	0.0124914	LOC412193	NC_037643.1	16807995	16814651	-	3889	protein_coding	S-formylglutathione hydrolase%2C transcript variant X2	-
551695	673.576	865.552	823.277	434.387	395.952	594.001	787.468	474.78	0.730561	0.00189281	0.0125051	LOC551695	NC_037649.1	7799357	7800551	+	836	protein_coding	gamma-secretase subunit pen-2	-
408527	259.156	252.589	464.106	157.055	161.519	188.366	325.284	168.98	0.947494	0.00189525	0.0125051	LOC408527	NC_037652.1	6468382	6470086	-	1262	protein_coding	pre-mRNA-splicing factor SPF27%2C transcript variant X2	-
726457	71.9242	81.6559	111.761	25.8446	17.5363	54.8155	88.447	32.7321	1.43993	0.001896	0.0125051	LOC726457	NC_037652.1	5079047	5085970	-	3632	protein_coding	flocculation protein FLO11%2C transcript variant X1	Serpin
412961	619.918	681.554	654.356	382.698	418.103	498.323	651.943	433.041	0.590459	0.00190251	0.0125394	LOC412961	NC_037646.1	6613578	6619138	+	2745	protein_coding	protein bicaudal D%2C transcript variant X1	-
413343	353.913	300.494	464.96	198.804	237.202	227.235	373.122	221.08	0.756685	0.00194991	0.0128169	LOC413343	NC_037648.1	9924452	9926273	+	1228	protein_coding	nucleoporin Nup37%2C transcript variant X2	-
551854	578.819	440.942	487.994	308.147	347.958	326.9	502.585	327.668	0.616405	0.00197395	0.0129573	LOC551854	NC_037642.1	10715790	10719237	-	2371	protein_coding	serine/threonine-protein phosphatase 5	PPP5
409114	51564	52073.6	43824.8	22113	29153.7	37399.1	49154.1	29555.3	0.73389	0.0019953	0.0130708	LOC409114	NC_037638.1	9101813	9105418	+	2047	protein_coding	ATP synthase subunit alpha%2C mitochondrial	ATP-synt_ab
408458	842.541	828.535	937.597	501.981	662.689	568.088	869.558	577.586	0.590344	0.00200129	0.0130924	LOC408458	NC_037651.1	7528467	7532753	-	3327	protein_coding	mediator of RNA polymerase II transcription subunit 24%2C transcript variant X3	-
725240	470.362	461.628	686.775	232.601	292.58	373.742	539.588	299.641	0.849867	0.00201677	0.0131491	LOC725240	NC_037647.1	5880997	5881813	+	643	protein_coding	mitochondrial import inner membrane translocase subunit Tim9%2C transcript variant X2	-
726196	848.249	849.221	676.537	543.73	387.646	537.192	791.336	489.522	0.692675	0.00201836	0.0131506	LOC726196	NC_037644.1	1364924	1366908	-	1523	protein_coding	ubiquitin-fold modifier 1%2C transcript variant X2	-
724263	707.826	716.394	791.711	335.979	388.568	572.074	738.644	432.207	0.773629	0.00202086	0.0131544	LOC724263	NC_037644.1	3246693	3247703	-	696	protein_coding	39S ribosomal protein L51%2C mitochondrial	-
550987	453.237	364.729	401.827	287.272	256.584	260.124	406.598	267.994	0.601208	0.00204488	0.013286	LOC550987	NC_037648.1	6162599	6164399	+	1523	protein_coding	soluble calcium-activated nucleotidase 1	-
novel.133	6.84993	14.1537	5.97196	0	0	0.996645	8.99186	0.332215	4.68748	0.00204635	0.013286	-	NC_037641.1	409077	411230	+	305	-	-	-
novel.123	1033.2	1048.46	1443.51	588.461	773.445	788.346	1175.06	716.751	0.713735	0.00204739	0.013286	-	NC_037640.1	7163188	7367907	-	8645	-	PF07525:SOCS box|PF00622:SPRY domain	SPRY
551644	17169.3	17017.1	15023.7	10804	12251.4	12196.9	16403.4	11750.8	0.48119	0.00207345	0.0134311	LOC551644	NC_037644.1	2198279	2199128	+	596	protein_coding	40S ribosomal protein S15	-
550935	2858.7	2107.81	3537.11	1383.68	1866.24	1736.16	2834.54	1662.02	0.770336	0.00209168	0.0135371	LOC550935	NC_037648.1	15094307	15102991	-	5134	protein_coding	splicing factor 3B subunit 3	-
726978	671.293	570.502	327.605	259.44	312.885	143.517	523.133	238.614	1.13104	0.00209433	0.0135452	LOC726978	NC_037652.1	6952644	6954822	+	997	protein_coding	homeodomain-only protein	Homeobox
100578035	713.534	885.149	759.292	575.538	524.244	456.463	785.992	518.749	0.59937	0.00211862	0.0136748	LOC100578035	NC_037653.1	4900449	4902899	-	1475	protein_coding	sphingolipid delta(4)-desaturase DES1%2C transcript variant X1	-
724678	175.815	164.4	182.571	114.312	108.91	103.651	174.262	108.958	0.678378	0.00213699	0.013775	LOC724678	NC_037638.1	11692336	11692976	+	641	protein_coding	histone H2A	Histone
412323	937.298	865.552	979.401	531.801	590.698	717.584	927.417	613.361	0.596812	0.00214988	0.0138489	LOC412323	NC_037645.1	6449793	6451773	-	1511	protein_coding	stomatin-like protein 2%2C mitochondrial	-
410515	57.0827	76.2121	75.076	32.8027	35.9957	34.8826	69.457	34.5603	1.00929	0.00215221	0.0138547	LOC410515	NC_037651.1	7830535	7841278	+	6795	protein_coding	uncharacterized LOC410515	An_peroxidase
410272	1847.2	2196	1864.96	1180.9	1494.28	1322.55	1969.38	1332.58	0.563306	0.00215672	0.0138589	LOC410272	NC_037648.1	16098835	16103905	-	2728	protein_coding	cationic amino acid transporter 2%2C transcript variant X3	-
725049	409.854	394.126	468.372	286.278	256.584	301.983	424.117	281.615	0.592287	0.00215716	0.0138589	LOC725049	NC_037647.1	11850045	11851069	-	675	protein_coding	nuclear nucleic acid-binding protein C1D	-
726375	1913.41	1740.9	1480.19	809.133	1326.3	754.46	1711.5	963.298	0.828746	0.00216196	0.0138805	LOC726375	NC_037639.1	15951719	15959999	-	4179	protein_coding	bone morphogenetic protein 2-B	-
408485	583.385	1146.45	1510.05	480.112	511.323	589.017	1079.96	526.817	1.03627	0.00217349	0.0139267	Reck	NC_037651.1	9410152	9423385	-	4005	protein_coding	reversion-inducing-cysteine-rich protein with kazal motifs	-
725011	174.673	170.933	203.9	119.283	104.295	115.611	183.169	113.063	0.698807	0.00218308	0.013979	LOC725011	NC_037641.1	7587236	7589123	-	1380	protein_coding	cytochrome c oxidase assembly protein COX18%2C mitochondrial%2C transcript variant X3	-
725491	1618.87	1809.49	2045.82	989.051	1063.26	1410.25	1824.73	1154.19	0.661153	0.0021896	0.0140114	LOC725491	NC_037639.1	12129848	12134050	-	3796	protein_coding	GPI mannosyltransferase 1%2C transcript variant X1	-
413989	913.324	863.375	882.143	623.251	503.016	662.769	886.281	596.346	0.571919	0.00219318	0.014025	LOC413989	NC_037647.1	246436	247938	-	1227	protein_coding	39S ribosomal protein L46%2C mitochondrial	-
724827	1237.55	1467.63	1260.08	640.15	845.436	984.685	1321.75	823.424	0.682646	0.00219837	0.0140467	LOC724827	NC_037653.1	2558984	2560114	-	540	protein_coding	NADH dehydrogenase [ubiquinone] 1 beta subcomplex subunit 7	NDUF_B7
726866	553.702	688.087	599.755	431.405	422.718	328.893	613.848	394.339	0.638225	0.00221186	0.014116	LOC726866	NC_037641.1	12394666	12411860	+	3571	protein_coding	uncharacterized LOC726866%2C transcript variant X4	-
100578976	537.719	546.55	569.895	300.194	420.872	234.212	551.388	318.426	0.79155	0.00222205	0.0141535	LOC100578976	NC_037648.1	15668670	15692569	+	3871	protein_coding	decorin%2C transcript variant X2	-
552283	138825	149354	95853.3	87654.8	49061.2	74722.5	128011	70479.5	0.860989	0.00223143	0.0142039	LOC552283	NC_037641.1	1880666	1915470	+	1777	protein_coding	uncharacterized LOC552283	GST_N
413805	1156.5	852.487	1601.34	434.387	569.47	821.236	1203.44	608.364	0.984644	0.00223647	0.0142266	LOC413805	NC_037640.1	12276409	12279333	-	1968	protein_coding	H/ACA ribonucleoprotein complex subunit 4	-
408944	3476.34	3061.55	4629.12	2249.47	2490.16	2384.97	3722.34	2374.87	0.648582	0.00224672	0.0142787	LOC408944	NC_037644.1	2679149	2933459	+	10076	protein_coding	probable JmjC domain-containing histone demethylation protein 2C%2C transcript variant X4	JmjC
726969	182.665	169.844	50.3351	37.7728	32.3038	65.7786	134.281	45.2851	1.56604	0.00225873	0.0143184	LOC726969	NC_037650.1	675640	680663	+	1252	protein_coding	farnesyl pyrophosphate synthase	-
727349	477.212	523.686	747.348	349.896	311.962	381.715	582.749	347.858	0.746094	0.00228692	0.0144713	LOC727349	NC_037647.1	52896	100131	-	1264	protein_coding	RNA-binding protein 1%2C transcript variant X3	RRM_1
412619	2571.01	2072.97	1892.26	671.958	781.752	1656.42	2178.74	1036.71	1.07148	0.00230321	0.0145459	LOC412619	NC_037640.1	602649	607412	+	1769	protein_coding	amidophosphoribosyltransferase%2C transcript variant X1	Pribosyltran
412827	36.5329	10.8874	20.4753	6.95815	2.7689	0	22.6319	3.24235	2.80242	0.00230523	0.0145492	LOC412827	NC_037645.1	4206539	4209688	-	2341	protein_coding	Bardet-Biedl syndrome 2 protein homolog	-
410747	2326.69	3169.34	698.719	660.03	193.823	155.477	2064.92	336.443	2.61765	0.0023267	0.0146559	LOC410747	NC_037638.1	6913520	6922497	-	3726	protein_coding	glucose dehydrogenase [FAD%2C quinone]%2C transcript variant X3	-
413005	1904.28	2030.51	2214.74	1409.52	1580.12	1318.56	2049.84	1436.07	0.513533	0.00233721	0.0147089	LOC413005	NC_037643.1	3962742	4005637	-	7101	protein_coding	protein NDRG3%2C transcript variant X2	Ndr
408365	9295.35	11802	11481.5	8226.52	7096.68	6328.7	10859.6	7217.3	0.589479	0.00233815	0.0147089	LOC408365	NC_037648.1	13001238	13006851	+	2608	protein_coding	uncharacterized LOC408365%2C transcript variant X1	-
410798	294.547	398.481	450.456	223.655	258.43	184.379	381.161	222.155	0.779781	0.00238077	0.0149576	Dnmt3	NC_037639.1	15816211	15827587	+	5146	protein_coding	DNA methyltransferase 3%2C transcript variant X1	DNA_methylase
408963	1124.53	976.604	1261.79	846.906	550.087	668.749	1120.97	688.581	0.703639	0.00239165	0.0150064	LOC408963	NC_037645.1	5890231	5975596	-	9112	protein_coding	pleckstrin homology domain-containing family G member 5%2C transcript variant X2	RhoGEF
551718	1121.1	947.208	913.709	656.054	695.916	711.605	994.007	687.858	0.530549	0.00240559	0.0150841	LOC551718	NC_037645.1	6744076	6745636	+	1225	protein_coding	ubiquitin-like protein 4A	ubiquitin
412986	229.473	309.203	331.87	129.223	155.981	204.312	290.182	163.172	0.832172	0.0024099	0.0151013	LOC412986	NC_037643.1	15066032	15072835	-	1779	protein_coding	putative fatty acyl-CoA reductase%2C transcript variant X1	NAD_binding_4
727280	782.033	1003.82	635.587	555.658	348.881	469.42	807.148	457.986	0.817309	0.00241381	0.0151062	LOC727280	NC_037651.1	10469677	10474098	+	2241	protein_coding	uncharacterized LOC727280	-
100576956	736.367	550.905	235.466	284.29	195.669	150.493	507.579	210.151	1.27114	0.00241667	0.0151144	LOC100576956	NC_037649.1	6789592	6816040	+	3159	protein_coding	metalloproteinase inhibitor 3%2C transcript variant X2	-
411969	4320.02	3902.06	6425.83	2625.21	2989.49	3186.27	4882.64	2933.66	0.735143	0.00242864	0.0151696	LOC411969	NC_037643.1	7168338	7173391	+	4263	protein_coding	heterogeneous nuclear ribonucleoprotein M%2C transcript variant X1	RRM_1
413128	576.536	424.61	418.037	174.948	313.808	286.037	473.061	258.264	0.87204	0.00243355	0.0151807	LOC413128	NC_037642.1	4934716	4951322	-	3158	protein_coding	putative ferric-chelate reductase 1 homolog%2C transcript variant X1	-
552791	328.796	278.719	325.898	209.739	175.363	216.272	311.138	200.458	0.635348	0.00243574	0.0151845	LOC552791	NC_037648.1	11912857	11913779	-	808	protein_coding	MIP18 family protein galla-2	-
726957	746.642	819.825	868.493	610.329	556.548	485.366	811.653	550.748	0.55994	0.00244441	0.0152287	LOC726957	NC_037642.1	13819098	13821916	-	1988	protein_coding	SAP30-binding protein%2C transcript variant X2	-
724511	195.223	295.05	408.653	131.211	179.978	148.5	299.642	153.23	0.969332	0.00245064	0.0152577	LOC724511	NC_037641.1	6739214	6742056	+	2756	protein_coding	zinc finger protein 665	zf-C2H2
408577	2398.62	2015.27	3212.06	1497	1601.35	1664.4	2541.98	1587.58	0.679461	0.00245484	0.0152733	LOC408577	NC_037638.1	18893490	18924923	+	11611	protein_coding	phosphatidylinositol 3-kinase regulatory subunit alpha%2C transcript variant X3	-
107964328	167.823	200.329	174.893	74.5516	107.987	122.587	181.015	101.709	0.831127	0.00250794	0.0155245	LOC107964328	NC_037641.1	11545374	11548524	-	2741	protein_coding	bone morphogenetic protein 10	TGFb_propeptide
551066	1460.18	1755.06	2162.7	1072.55	969.114	1299.63	1792.64	1113.76	0.687182	0.00251532	0.0155503	LOC551066	NC_037643.1	9063632	9071392	-	1708	protein_coding	putative uncharacterized protein DDB_G0274405%2C transcript variant X1	-
408304	4625.98	5101.86	6838.74	2627.2	2475.39	4188.9	5522.2	3097.16	0.834439	0.00252249	0.0155788	LOC408304	NC_037647.1	973245	1070596	-	1578	protein_coding	nuclear migration protein nudC	-
408570	1244.4	856.842	657.768	399.597	484.557	604.964	919.671	496.372	0.889006	0.00253327	0.0156213	LOC408570	NC_037638.1	21787602	21807097	-	3480	protein_coding	uncharacterized LOC408570%2C transcript variant X1	-
552130	4282.35	3848.71	6113.58	1622.24	3366.98	2427.83	4748.21	2472.35	0.941535	0.00254619	0.015681	LOC552130	NC_037644.1	8722606	8729493	+	3064	protein_coding	alpha-aminoadipic semialdehyde synthase%2C mitochondrial	Saccharop_dh
406084	667.868	463.805	629.615	326.039	225.204	415.601	587.096	322.281	0.865966	0.00255363	0.0157168	Ecr	NC_037645.1	9626947	9747799	+	4976	protein_coding	ecdysone receptor%2C transcript variant X1	-
408966	2789.06	2902.59	3648.01	2055.64	2244.65	2080	3113.22	2126.76	0.55001	0.00255738	0.0157286	LOC408966	NC_037645.1	7608846	7621581	+	3328	protein_coding	dnaJ homolog subfamily B member 6%2C transcript variant X6	DnaJ
100576617	237.464	513.887	332.723	45.725	224.281	98.6679	361.358	122.891	1.55485	0.00255941	0.0157286	LOC100576617	NC_037650.1	8547828	8604770	+	8090	protein_coding	uncharacterized LOC100576617%2C transcript variant X1	-
413898	981.823	781.719	649.237	552.676	465.175	492.343	804.26	503.398	0.675146	0.00256971	0.0157556	LOC413898	NC_037643.1	15656730	15660734	-	1238	protein_coding	protein YIPF6%2C transcript variant X2	-
409990	5753.94	4967.94	4403.89	2686.84	3153.77	3844.06	5041.92	3228.22	0.643134	0.00257173	0.015758	LOC409990	NC_037645.1	6939762	6945908	+	3214	protein_coding	coatomer subunit beta'	Coatomer_WDAD
100576449	258.014	320.091	382.205	191.846	187.362	211.289	320.103	196.832	0.703984	0.0025735	0.0157588	LOC100576449	NC_037642.1	2809829	2859419	+	9040	protein_coding	protein patched%2C transcript variant X2	-
552779	1050.32	1066.97	1028.88	584.485	576.853	840.172	1048.72	667.17	0.652666	0.00259007	0.0158502	LOC552779	NC_037648.1	4261755	4263787	+	1052	protein_coding	ubiquitin-conjugating enzyme E2 G2%2C transcript variant X2	UQ_con
552827	728.376	791.517	704.691	446.316	387.646	578.054	741.528	470.672	0.655961	0.0025992	0.015876	LOC552827	NC_037652.1	7247225	7247957	-	408	protein_coding	probable small nuclear ribonucleoprotein G	-
100576253	14050.3	14251.7	7430.82	1984.07	3536.8	8054.89	11910.9	4525.25	1.3962	0.00260484	0.0158862	LOC100576253	NC_037643.1	11310906	11313905	+	2211	protein_coding	DNA ligase 1%2C transcript variant X1	-
413441	3535.7	2810.05	2851.18	937.362	888.816	2358.06	3065.65	1394.75	1.13624	0.00260676	0.0158862	LOC413441	NC_037647.1	11289770	11293337	-	2609	protein_coding	dnaJ homolog subfamily C member 3	DnaJ
550804	63228.2	67558.8	55570.8	22051.4	45037.9	36756.3	62119.3	34615.2	0.843626	0.00260744	0.0158862	LOC550804	NC_037639.1	15603944	15609543	-	2707	protein_coding	transketolase%2C transcript variant X1	-
726786	383.596	378.883	331.017	182.9	127.369	270.091	364.499	193.453	0.914366	0.00261146	0.0159007	LOC726786	NC_037644.1	4881425	4932463	+	2252	protein_coding	proton-coupled amino acid transporter 1%2C transcript variant X1	Aa_trans
411812	2105.21	2231.93	2647.28	1365.79	1766.56	1536.83	2328.14	1556.39	0.581153	0.00262991	0.0159928	LOC411812	NC_037649.1	2301031	2383188	-	5860	protein_coding	serine/threonine-protein kinase Doa%2C transcript variant X3	Pkinase
412342	635.902	540.017	577.574	414.507	420.872	370.752	584.498	402.044	0.539398	0.00263879	0.0160172	LOC412342	NC_037640.1	4413035	4414909	-	1217	protein_coding	cyclin-Q	-
410308	10350.2	9643.01	7627.9	4653.01	5163.07	7093.12	9207.05	5636.4	0.707917	0.00263889	0.0160172	LOC410308	NC_037648.1	9864209	9866005	+	1454	protein_coding	electron transfer flavoprotein subunit beta	-
100578123	69.6409	78.3896	46.9225	30.8147	28.6119	30.896	64.9844	30.1075	1.10463	0.00264093	0.0160176	LOC100578123	NC_037642.1	9800870	9802607	+	1099	protein_coding	uncharacterized LOC100578123	-
552811	43.3829	52.2597	41.8037	25.8446	12.9215	16.943	45.8154	18.5697	1.30501	0.00264226	0.0160176	LOC552811	NC_037640.1	12305615	12309602	+	2125	protein_coding	laccase-5	-
552531	23320.6	28492.4	29158.5	8830.89	9847.12	21128.9	26990.5	13269	1.02441	0.00266754	0.0161506	LOC552531	NC_037653.1	1228522	1229993	-	685	protein_coding	10 kDa heat shock protein%2C mitochondrial	-
100578770	542.286	566.147	825.836	279.32	290.734	473.406	644.757	347.82	0.891569	0.00267407	0.0161799	LOC100578770	NC_037646.1	11537497	11548891	+	3928	protein_coding	uncharacterized LOC100578770	-
100576700	1285.5	719.66	476.903	448.304	262.122	412.611	827.356	374.346	1.14368	0.00267747	0.0161904	LOC100576700	NC_037638.1	1491999	1644613	+	3961	protein_coding	class A basic helix-loop-helix protein 15%2C transcript variant X2	-
550968	2016.16	1703.89	2196.83	923.446	1216.47	1481.01	1972.29	1206.98	0.708632	0.0026868	0.0162265	LOC550968	NC_037643.1	11859277	11862923	-	2248	protein_coding	heat shock protein 75 kDa%2C mitochondrial	HATPase_c
408353	3972.96	4049.04	3520.04	2300.17	2777.2	2910.2	3847.35	2662.52	0.530926	0.00269397	0.0162597	LOC408353	NC_037648.1	12179253	12180603	-	1013	protein_coding	proteasome subunit beta type-7	Proteasome
552071	6594.2	6781.79	6583.66	4046.66	4396.08	5368.93	6653.21	4603.89	0.531208	0.0027053	0.0163179	LOC552071	NC_037651.1	5215233	5217178	-	1432	protein_coding	pentatricopeptide repeat-containing protein 2%2C mitochondrial	-
412388	562.836	525.864	578.427	408.543	394.106	325.903	555.709	376.184	0.563017	0.00272177	0.0164068	LOC412388	NC_037653.1	876726	879002	+	2038	protein_coding	CCR4-NOT transcription complex subunit 9%2C transcript variant X1	-
409573	345.921	297.227	394.149	204.768	240.894	220.259	345.766	221.974	0.640449	0.00272344	0.0164068	LOC409573	NC_037652.1	1798228	1804590	+	4202	protein_coding	zinc finger protein 2 homolog%2C transcript variant X2	-
724745	20.5498	19.5974	8.53137	3.97609	1.84593	2.98994	16.2262	2.93732	2.46202	0.00273474	0.0164544	LOC724745	NC_037643.1	3421290	3451957	+	594	protein_coding	transmembrane and TPR repeat-containing protein 1-like	-
551167	7563.46	9891.25	9415.22	4174.89	6447.84	5958.94	8956.64	5527.22	0.696405	0.00275576	0.0165577	LOC551167	NC_037639.1	13438449	13494272	+	9544	protein_coding	multidrug resistance protein homolog 49%2C transcript variant X1	-
552387	279.705	395.214	252.528	179.918	166.134	199.329	309.149	181.794	0.765052	0.00275877	0.0165577	LOC552387	NC_037643.1	13042025	13044786	+	1200	protein_coding	UDP-galactose transporter senju	-
100577702	538.861	554.171	592.077	247.511	293.503	439.521	561.703	326.845	0.781705	0.00277021	0.0166058	LOC100577702	NC_037642.1	11232342	11233385	-	738	protein_coding	39S ribosomal protein L11%2C mitochondrial	-
409145	640.468	698.974	576.72	332.997	343.343	499.319	638.721	391.887	0.704599	0.00282058	0.0168659	LOC409145	NC_037649.1	3935850	3937723	+	1185	protein_coding	zinc transporter ZIP9%2C transcript variant X1	-
102654169	3655.58	3698.47	3663.37	1682.88	2048.98	2939.11	3672.47	2223.66	0.723849	0.00283299	0.0169192	LOC102654169	NC_037640.1	6079111	6080789	-	893	protein_coding	acyl carrier protein%2C mitochondrial%2C transcript variant X2	PP-binding
411694	876.791	832.89	863.374	574.544	525.167	672.735	857.685	590.816	0.538034	0.00284063	0.0169543	LOC411694	NC_037652.1	5198738	5204089	+	2328	protein_coding	E3 ubiquitin-protein ligase KCMF1%2C transcript variant X2	ZZ
novel.494	7.99158	3.26623	6.82509	0	0	0	6.02764	0	5.07833	0.00284489	0.0169693	-	NC_037653.1	2894185	2897306	-	1009	-	-	-
409236	4937.66	5454.61	4394.51	2794.19	2971.95	3896.88	4928.92	3221.01	0.613708	0.0029383	0.0174619	LOC409236	NC_037639.1	13326911	13328209	-	870	protein_coding	ATP synthase subunit O%2C mitochondrial	-
406072	175.815	198.152	107.495	76.5396	96.9114	74.7484	160.487	82.7331	0.951445	0.00296078	0.0175846	Amih	NC_037645.1	323612	504123	+	9167	protein_coding	hyperpolarization-activated ion channel%2C transcript variant X9	cNMP_binding
551224	989.814	1267.3	868.493	627.227	756.832	536.195	1041.87	640.085	0.702167	0.00297211	0.0176411	LOC551224	NC_037644.1	10770615	10793045	-	4066	protein_coding	aminopeptidase N%2C transcript variant X2	-
413842	1293.49	1380.53	1304.45	1005.95	965.422	967.742	1326.16	979.705	0.436803	0.00298258	0.0176815	LOC413842	NC_037649.1	7792786	7794308	+	928	protein_coding	splicing factor U2af 38 kDa subunit	zf-CCCH
551742	945.29	866.641	877.878	621.263	635.923	682.702	896.603	646.63	0.471351	0.00304041	0.0179803	LOC551742	NC_037651.1	1772122	1776863	-	1097	protein_coding	MICOS complex subunit MIC25%2C transcript variant X1	-
677678	9.13324	10.8874	10.2376	0	1.84593	0	10.0861	0.61531	3.98147	0.00307214	0.018129	Obp12	NC_037649.1	6997861	6998979	-	722	protein_coding	odorant binding protein 12	-
410678	721.526	741.435	632.174	358.842	424.564	541.178	698.378	441.528	0.661135	0.00308317	0.0181776	LOC410678	NC_037638.1	20671863	20673686	+	828	protein_coding	mitochondrial ribosomal protein S11	-
411795	535.436	542.195	691.041	349.896	326.73	442.51	589.557	373.045	0.661654	0.00308769	0.018182	LOC411795	NC_037648.1	7233459	7236380	-	1995	protein_coding	Golgi to ER traffic protein 4 homolog%2C transcript variant X2	-
408293	665.585	536.751	559.658	391.644	412.566	405.635	587.331	403.282	0.541686	0.00314117	0.0184632	LOC408293	NC_037647.1	9285761	9293522	+	6087	protein_coding	exostosin-1%2C transcript variant X1	-
552743	288.839	317.913	273.857	130.217	154.135	224.245	293.536	169.532	0.791882	0.00316089	0.0185463	LOC552743	NC_037638.1	5033451	5034493	-	686	protein_coding	trafficking protein particle complex subunit 2-like protein	-
725316	220.339	254.766	231.2	163.02	117.217	156.473	235.435	145.57	0.694703	0.0031616	0.0185463	LOC725316	NC_037648.1	4402857	4404321	+	953	protein_coding	transmembrane protein 208	-
551165	2452.27	3550.4	4220.47	1760.41	2204.96	2172.69	3407.71	2046.02	0.736178	0.00316266	0.0185463	LOC551165	NC_037653.1	3099386	3115054	+	4081	protein_coding	innexin inx3%2C transcript variant X1	-
413344	973.831	720.749	988.786	473.154	577.776	641.839	894.455	564.257	0.664926	0.00316298	0.0185463	LOC413344	NC_037648.1	9917400	9924509	-	5740	protein_coding	exportin-5	-
411080	235.181	164.4	227.788	120.277	139.368	113.618	209.123	124.421	0.749172	0.0031904	0.0186958	LOC411080	NC_037642.1	6535573	6538217	-	2480	protein_coding	serine/threonine-protein kinase greatwall%2C transcript variant X3	Pkinase
novel.280	512.603	486.669	681.656	332.997	391.337	351.816	560.309	358.717	0.644533	0.00320177	0.0187397	-	NC_037645.1	7186361	7188795	+	875	-	-	-
409264	2310.71	2049.02	1717.36	1456.24	1395.52	1300.62	2025.7	1384.13	0.549016	0.00320969	0.0187719	LOC409264	NC_037645.1	6322133	6323893	+	1326	protein_coding	ATPase ASNA1 homolog	-
724379	63.9327	35.9286	83.6074	22.8625	31.3808	17.9396	61.1562	24.061	1.34785	0.00321827	0.0187953	LOC724379	NC_037651.1	2816800	2821502	-	2556	protein_coding	tubulin polyglutamylase TTLL4	TTL
551559	10878.8	10804.7	7909.43	4265.35	3555.26	7687.12	9864.32	5169.24	0.93226	0.00321905	0.0187953	LOC551559	NC_037638.1	22801964	22803320	-	858	protein_coding	translocon-associated protein subunit beta	-
409295	871.082	776.275	744.788	526.831	596.236	560.115	797.382	561.061	0.506351	0.00323934	0.0188568	LOC409295	NC_037640.1	8287452	8289261	-	1361	protein_coding	mitochondrial E3 ubiquitin protein ligase 1	-
725047	1580.05	1191.09	2662.64	643.132	964.499	1102.29	1811.26	903.307	1.00405	0.00324139	0.0188574	LOC725047	NC_037647.1	9146222	9149763	+	2842	protein_coding	nucleolin 1%2C transcript variant X3	-
413943	6116.98	4915.68	5945.51	3134.15	3646.64	4399.19	5659.39	3726.66	0.602794	0.00326666	0.018993	LOC413943	NC_037648.1	14337974	14342876	-	3063	protein_coding	eukaryotic peptide chain release factor GTP-binding subunit ERF3A	GTP_EFTU
725880	1343.73	1618.96	1661.06	746.51	892.508	1206.94	1541.25	948.652	0.700403	0.00327476	0.0190208	LOC725880	NC_037647.1	6315325	6317612	-	574	protein_coding	small nuclear ribonucleoprotein F%2C transcript variant X3	-
551841	840.258	741.435	792.564	518.879	460.56	617.92	791.419	532.453	0.572051	0.00327539	0.0190208	LOC551841	NC_037645.1	1909513	1911629	+	1675	protein_coding	probable dolichyl pyrophosphate Glc1Man9GlcNAc2 alpha-1%2C3-glucosyltransferase%2C transcript variant X2	-
413144	641.61	509.533	566.483	425.441	374.724	309.957	572.542	370.041	0.629418	0.00328587	0.0190703	LOC413144	NC_037648.1	15158016	15159869	-	1576	protein_coding	actin related protein 11%2C transcript variant X1	Actin
551966	7754.12	9057.27	5483.96	1069.57	1384.45	5288.2	7431.78	2580.74	1.52594	0.00330992	0.0191753	LOC551966	NC_037640.1	597759	601973	-	1838	protein_coding	multifunctional protein ADE2%2C transcript variant X1	-
725925	447.529	312.47	482.022	214.709	270.429	264.111	414.007	249.749	0.729846	0.00335183	0.0193485	LOC725925	NC_037650.1	3870167	3873027	+	2744	protein_coding	prolyl 3-hydroxylase OGFOD1	-
726711	350.488	480.136	331.87	205.762	259.353	248.165	387.498	237.76	0.703498	0.00344387	0.0197854	LOC726711	NC_037639.1	10203023	10203797	-	518	protein_coding	ribonuclease H2 subunit C	-
410004	1102.84	1204.15	1224.25	901.577	780.829	858.111	1177.08	846.839	0.475494	0.00346521	0.0198726	LOC410004	NC_037645.1	8585456	8586628	+	576	protein_coding	transcription initiation factor TFIID subunit 10	-
410222	743.217	655.424	1397.44	276.338	389.491	621.907	932.026	429.245	1.11928	0.00352968	0.0201705	LOC410222	NC_037647.1	7656638	7688077	+	10349	protein_coding	zinc finger protein 853%2C transcript variant X4	-
411207	9796.54	6321.25	9462.14	613.311	3601.41	1095.31	8526.64	1770.01	2.26817	0.00353798	0.020206	LOC411207	NC_037641.1	10599268	10604226	-	4959	protein_coding	CCAAT/enhancer-binding protein	-
408398	432.687	459.45	627.909	271.368	344.266	328.893	506.682	314.842	0.687743	0.00359533	0.020459	LOC408398	NC_037650.1	2524150	2539984	-	2273	protein_coding	cytochrome P450 306a1%2C transcript variant X1	p450
552781	884.782	1013.62	1269.47	571.562	628.54	789.343	1055.96	663.148	0.671896	0.00364566	0.0207109	LOC552781	NC_037652.1	3895314	3896376	-	852	protein_coding	H/ACA ribonucleoprotein complex subunit 2-like protein	-
724494	3982.09	4249.37	4530.16	2089.43	3425.12	2525.5	4253.87	2680.02	0.666495	0.00374558	0.0211992	LOC724494	NC_037647.1	11424810	11430693	-	1198	protein_coding	methionine-R-sulfoxide reductase B1%2C transcript variant X6	-
725300	6628.45	8443.22	10460.3	6215.62	5098.46	4231.76	8510.66	5181.94	0.715862	0.00377023	0.0213059	CPR13	NC_037643.1	5258316	5259391	-	865	protein_coding	cuticular protein 13	Chitin_bind_4
408515	15934.1	13893.5	14278.1	9240.42	11022.1	11226.2	14701.9	10496.2	0.486104	0.0037806	0.021352	LOC408515	NC_037652.1	7832935	7834240	-	620	protein_coding	60S ribosomal protein L26	KOW
409290	16568.8	15647.4	16407.5	11715.5	12869.8	9838.88	16207.9	11474.7	0.498222	0.00380617	0.0214378	LOC409290	NC_037638.1	4554373	4555637	-	605	protein_coding	60S ribosomal protein L14%2C transcript variant X1	-
724659	164.398	192.708	202.193	75.5456	134.753	102.654	186.433	104.318	0.837291	0.00380838	0.0214378	LOC724659	NC_037644.1	8138252	8139460	+	684	protein_coding	ribonuclease P protein subunit rpr2	-
552050	1517.26	1526.42	1286.53	969.171	925.734	1123.22	1443.4	1006.04	0.520498	0.00380909	0.0214378	LOC552050	NC_037644.1	12295508	12296447	-	717	protein_coding	uncharacterized protein RAB5IF homolog	Rab5ip
551510	581.102	551.994	1166.24	220.673	193.823	534.202	766.445	316.232	1.27812	0.00383152	0.0215515	LOC551510	NC_037640.1	13453456	13478071	+	3052	protein_coding	uncharacterized LOC551510%2C transcript variant X3	-
100576467	1959.08	1883.53	1877.75	1317.08	1486.9	1436.17	1906.79	1413.38	0.431838	0.00387365	0.0217505	LOC100576467	NC_037640.1	3496059	3552405	+	632	protein_coding	14 kDa phosphohistidine phosphatase	-
411585	401.862	359.286	327.605	248.505	215.974	260.124	362.918	241.535	0.586612	0.00388393	0.0217888	LOC411585	NC_037648.1	4319998	4321967	-	1449	protein_coding	E3 ubiquitin-protein ligase NRDP1%2C transcript variant X2	zf-C3HC4
410039	1227.28	1146.45	1395.73	707.743	912.813	919.903	1256.49	846.82	0.569537	0.003903	0.0218771	LOC410039	NC_037650.1	5649309	5652052	+	1728	protein_coding	cysteine desulfurase%2C mitochondrial%2C transcript variant X1	Aminotran_5
novel.67	99.3239	39.1948	59.7196	6.95815	13.8445	36.8759	66.0794	19.2262	1.78165	0.00391221	0.0219034	-	NC_037639.1	4428985	4430442	+	1308	-	-	-
113218892	681.568	640.182	689.335	298.206	280.582	542.175	670.361	373.654	0.843694	0.00391514	0.0219071	LOC113218892	NC_037644.1	3813871	3814924	+	556	protein_coding	28S ribosomal protein S21%2C mitochondrial	-
410188	27344.9	25564.8	23849.4	16322.8	20207.4	18497.7	25586.4	18342.7	0.480146	0.00395149	0.0220977	LOC410188	NC_037647.1	11305152	11306951	-	932	protein_coding	60S ribosomal protein L8	Ribosomal_L2_C
409286	799.158	881.883	914.563	624.245	643.307	613.933	865.201	627.162	0.464646	0.00395972	0.0221309	LOC409286	NC_037640.1	1505655	1633745	+	3605	protein_coding	stress-activated protein kinase JNK%2C transcript variant X7	-
725641	716.959	652.158	784.033	345.919	402.413	570.081	717.717	439.471	0.708153	0.00400356	0.0223426	LOC725641	NC_037648.1	2802833	2803838	-	790	protein_coding	U6 snRNA-associated Sm-like protein LSm5	-
413450	742.075	604.253	780.62	383.692	465.175	530.215	708.983	459.694	0.625495	0.00400683	0.0223426	LOC413450	NC_037649.1	3880103	3882762	+	1802	protein_coding	sorting and assembly machinery component 50 homolog	-
411552	22.8331	30.4849	40.9506	5.96413	12.9215	12.9564	31.4228	10.614	1.57018	0.00402725	0.0224306	LOC411552	NC_037648.1	14499154	14502255	-	3102	protein_coding	ceramide glucosyltransferase	-
102656190	1495.57	700.063	750.76	301.188	118.14	624.897	982.13	348.075	1.49665	0.00403965	0.0224867	LOC102656190	NC_037640.1	11670639	11672489	+	1439	protein_coding	uncharacterized LOC102656190	-
727582	845.966	769.742	665.447	535.778	553.779	473.406	760.385	520.988	0.544436	0.00404391	0.0224904	LOC727582	NC_037642.1	5019219	5021143	-	1633	protein_coding	tryptophan--tRNA ligase%2C cytoplasmic	-
411508	244.314	256.944	238.878	153.079	141.214	185.376	246.712	159.89	0.626085	0.00404498	0.0224904	LOC411508	NC_037649.1	8595014	8597804	-	1646	protein_coding	tubulin gamma-2 chain	Tubulin
100578466	81.0575	71.8571	100.67	35.7848	48.9172	48.8356	84.5283	44.5125	0.928163	0.0040631	0.0225782	LOC100578466	NC_037647.1	11946696	11953717	-	2471	protein_coding	uncharacterized LOC100578466%2C transcript variant X2	-
408508	336.788	742.524	831.808	225.643	410.72	263.114	637.04	299.826	1.08756	0.00408489	0.0226522	LOC408508	NC_037652.1	8780958	8799109	+	4067	protein_coding	uncharacterized LOC408508%2C transcript variant X1	-
100576359	565.119	480.136	612.552	360.83	371.955	401.648	552.603	378.144	0.548193	0.00408905	0.0226522	LOC100576359	NC_037642.1	2288022	2290670	-	2149	protein_coding	integrator complex subunit 11	-
725251	640.468	799.139	762.704	366.794	483.634	550.148	734.104	466.859	0.653223	0.00408932	0.0226522	LOC725251	NC_037653.1	2819728	2825809	+	3765	protein_coding	101 kDa malaria antigen%2C transcript variant X1	-
724221	2093.79	2558.55	1911.03	1056.64	1100.17	1746.12	2187.79	1300.98	0.74984	0.00408937	0.0226522	LOC724221	NC_037643.1	14523108	14524378	+	540	protein_coding	uncharacterized LOC724221	-
100577552	708.967	707.684	902.619	500.987	557.471	525.232	773.09	527.897	0.551285	0.00409047	0.0226522	LOC100577552	NC_037643.1	6464125	6475423	-	4245	protein_coding	trithorax group protein osa%2C transcript variant X2	-
107965317	12.5582	13.0649	28.1535	3.97609	5.53779	1.99329	17.9255	3.83572	2.22867	0.00409572	0.0226683	LOC107965317	NC_037649.1	10845963	10847761	-	1476	protein_coding	uncharacterized LOC107965317	-
411423	1093.7	1242.26	1025.47	539.754	834.361	760.44	1120.48	711.518	0.654709	0.00415984	0.0229706	LOC411423	NC_037645.1	1582371	1584680	-	1476	protein_coding	poly(ADP-ribose) glycohydrolase ARH3%2C transcript variant X3	-
409846	2132.61	1970.63	2643.02	1343.92	1629.03	1586.66	2248.75	1519.87	0.565457	0.00419189	0.023108	LOC409846	NC_037650.1	3042633	3047114	+	2962	protein_coding	GMP synthase [glutamine-hydrolyzing]	GATase
102653881	136.999	39.1948	0.853137	2.98206	0	0.996645	59.0155	1.32624	5.4832	0.00421032	0.0231964	LOC102653881	NC_037638.1	8329383	8330852	-	1091	protein_coding	glucose dehydrogenase [FAD%2C quinone]-like	-
552318	26640.5	26960.6	23445.9	16042.5	14666.8	20939.5	25682.3	17216.3	0.576998	0.00422769	0.0232523	LOC552318	NC_037653.1	2724252	2726060	-	634	protein_coding	60S ribosomal protein L27a%2C transcript variant X2	-
100577347	78.7742	89.2771	100.67	47.713	58.1468	32.8893	89.5738	46.2497	0.953841	0.00426146	0.0233939	LOC100577347	NC_037653.1	1000799	1077238	+	3373	protein_coding	SET and MYND domain-containing protein 4%2C transcript variant X3	SET
408782	35748.6	43240.6	51356.3	31667.5	28242.7	28449.2	43448.5	29453.2	0.560905	0.00432229	0.0236783	LOC408782	NC_037641.1	12053300	12058225	-	1834	protein_coding	tubulin beta-1	Tubulin
551861	3471.77	4626.08	3839.12	1693.81	1577.35	3215.18	3978.99	2162.11	0.880023	0.00433551	0.0237239	LOC551861	NC_037652.1	5194047	5195027	+	419	protein_coding	ATP synthase subunit e%2C mitochondrial	-
724556	2600.69	3301.07	1024.62	1520.85	383.954	526.229	2308.79	810.345	1.51049	0.00436679	0.0238815	CPR17	NC_037639.1	2920896	2925787	+	1201	protein_coding	cuticular protein 17	Chitin_bind_4
408602	618.777	666.312	805.361	476.136	491.018	475.4	696.817	480.851	0.536297	0.004382	0.0239182	LOC408602	NC_037638.1	8247253	8533011	+	10765	protein_coding	MKL/myocardin-like protein 2%2C transcript variant X7	SAP
100576851	8366.04	9084.49	7224.36	5456.18	5741.77	6340.66	8224.96	5846.2	0.492435	0.00438339	0.0239182	LOC100576851	NC_037650.1	2431447	2434652	+	2689	protein_coding	ornithine decarboxylase antizyme 1	-
551411	2847.29	3048.49	2564.53	1670.95	1780.4	2278.33	2820.1	1909.89	0.562168	0.00439282	0.0239291	LOC551411	NC_037638.1	4810352	4811580	+	648	protein_coding	proteasome maturation protein	-
727284	84.4824	151.336	110.908	52.6831	74.7602	36.8759	115.575	54.7731	1.07528	0.0044109	0.0240141	LOC727284	NC_037651.1	10409616	10420870	-	7150	protein_coding	transcription factor Sox-10%2C transcript variant X3	-
724320	369.896	383.238	366.849	228.625	208.59	294.01	373.328	243.742	0.615568	0.00442855	0.0240966	LOC724320	NC_037645.1	12181235	12182933	+	516	protein_coding	PHD finger-like domain-containing protein 5A	-
410795	1335.74	1394.68	1232.78	853.864	1007.88	984.685	1321.07	948.809	0.477109	0.00444102	0.0241328	LOC410795	NC_037639.1	15850478	15864798	+	5772	protein_coding	trehalase	-
551676	2777.65	3004.94	2406.7	1576.52	2057.29	1954.42	2729.76	1862.74	0.551087	0.00444144	0.0241328	LOC551676	NC_037638.1	14288984	14290951	-	1516	protein_coding	methylmalonic aciduria and homocystinuria type D homolog%2C mitochondrial%2C transcript variant X2	-
100576146	255.731	299.405	500.791	180.912	199.361	204.312	351.976	194.862	0.855394	0.00450305	0.0244469	LOC100576146	NC_037644.1	106779	109015	+	1758	protein_coding	aladin	-
113218567	53.6578	43.5498	59.7196	19.8804	32.3038	16.943	52.309	23.0424	1.18091	0.00455509	0.0247115	LOC113218567	NC_037644.1	7130504	7502881	-	2409	protein_coding	CCR4-NOT transcription complex subunit 6-like%2C transcript variant X3	-
409831	4004.92	3705	3120.77	2085.46	2160.66	2886.28	3610.23	2377.47	0.602554	0.0045569	0.0247115	LOC409831	NC_037649.1	10024048	10025542	+	891	protein_coding	proteasome subunit beta type-6	Proteasome
551866	2730.84	2570.53	2224.13	1367.77	1602.27	1994.29	2508.5	1654.78	0.600025	0.00456499	0.0247416	LOC551866	NC_037645.1	1912004	1914121	+	1377	protein_coding	NADH dehydrogenase [ubiquinone] 1 alpha subcomplex subunit 9%2C mitochondrial	Epimerase
408951	18339.5	18920.2	18242.6	11826.9	12052.1	15349.3	18500.8	13076.1	0.500661	0.00458295	0.0248249	LOC408951	NC_037644.1	2329917	2337531	+	3458	protein_coding	14-3-3 protein epsilon	-
410259	247.739	222.104	374.527	149.103	163.365	179.396	281.457	163.955	0.782327	0.00459033	0.0248371	LOC410259	NC_037648.1	14089274	14168184	-	10903	protein_coding	nuclear factor 1 X-type%2C transcript variant X6	-
408620	259.156	280.896	414.624	201.786	185.516	190.359	318.225	192.554	0.727555	0.00463239	0.0250306	LOC408620	NC_037638.1	4394644	4404101	-	1397	protein_coding	RNA-binding protein 42%2C transcript variant X2	RRM_1
551036	1713.62	1721.31	1529.67	1177.92	1185.09	1288.66	1654.87	1217.22	0.442842	0.00463386	0.0250306	LOC551036	NC_037652.1	9026885	9031737	-	1774	protein_coding	vacuole membrane protein 1%2C transcript variant X1	-
725015	1251.25	902.569	1181.59	613.311	837.13	702.635	1111.81	717.692	0.631347	0.0046483	0.0250946	LOC725015	NC_037642.1	5402476	5413872	+	6006	protein_coding	monocarboxylate transporter 3%2C transcript variant X1	MFS_1
100302106	4453.59	5126.9	4188.05	2547.68	2890.73	3687.59	4589.51	3042	0.593279	0.00466566	0.0251743	LOC100302106	NC_037648.1	2610971	2612176	-	935	protein_coding	uncharacterized LOC100302106%2C transcript variant 2	-
551596	5139.73	4798.1	6546.97	2748.47	2856.58	4396.2	5494.93	3333.75	0.72108	0.00467105	0.0251893	LOC551596	NC_037639.1	4472496	4475150	+	1095	protein_coding	uncharacterized LOC551596	-
726301	1815.23	1532.95	2015.11	1024.84	1359.53	1211.92	1787.76	1198.76	0.576748	0.00468553	0.0252486	LOC726301	NC_037648.1	14171668	14173651	-	1511	protein_coding	actin-related protein 2/3 complex subunit 4	-
725742	271.714	313.558	263.619	194.828	161.519	201.322	282.964	185.89	0.606151	0.00468727	0.0252486	LOC725742	NC_037639.1	6761380	6763250	+	1253	protein_coding	vacuolar ATPase assembly integral membrane protein VMA21 homolog	-
409622	5242.48	5430.66	4751.12	2654.04	3409.43	4083.26	5141.42	3382.24	0.604132	0.00471004	0.0253571	LOC409622	NC_037648.1	6387903	6404230	-	3263	protein_coding	spermatogenesis-associated protein 20%2C transcript variant X2	-
410309	2074.39	2542.22	2301.76	1870.75	1188.78	1336.5	2306.12	1465.34	0.654369	0.00472136	0.0253757	E75	NC_037648.1	10210607	10372038	-	11080	protein_coding	ecdysone-induced protein 75%2C transcript variant X3	-
410582	69.6409	74.0346	90.4325	14.9103	18.4593	53.8188	78.036	29.0628	1.4289	0.00477081	0.0255704	LOC410582	NC_037652.1	7613797	7616784	+	2546	protein_coding	ornithine aminotransferase%2C mitochondrial	Aminotran_3
102655889	1564.07	1178.02	273.857	113.318	0.922966	4.98323	1005.32	39.7415	4.66119	0.00477364	0.0255714	LOC102655889	NC_037643.1	3403140	3419391	-	14913	protein_coding	uncharacterized protein PF11_0213	-
novel.259	38.8163	44.6385	109.202	22.8625	11.0756	30.896	64.2188	21.6114	1.58109	0.00480388	0.0256907	-	NC_037644.1	1038482	1068354	-	1090	-	-	-
552705	845.966	992.935	916.269	456.256	391.337	747.484	918.39	531.692	0.788865	0.00480946	0.025705	LOC552705	NC_037649.1	8590966	8592397	-	1106	protein_coding	protein jagunal	-
410254	9830.79	12333.3	7239.72	3615.26	5094.77	7284.48	9801.27	5331.5	0.878388	0.0048141	0.025705	LOC410254	NC_037648.1	13848442	13850983	+	1695	protein_coding	glutaryl-CoA dehydrogenase%2C mitochondrial	-
107965199	2230.79	3535.15	1984.4	352.878	1070.64	144.514	2583.45	522.677	2.30514	0.00488646	0.0260602	LOC107965199	NC_037648.1	10467257	10471396	+	2746	protein_coding	UDP-glucuronosyltransferase 1-1%2C transcript variant X4	-
100359409	3146.4	3269.5	3051.67	2145.1	1991.76	2586.29	3155.86	2241.05	0.493884	0.0048945	0.0260887	Cox6b1	NC_037646.1	7762983	7766728	-	1330	protein_coding	cytochrome c oxidase subunit VIb polypeptide 1	-
113219378	114.165	55.526	41.8037	36.7788	23.9971	19.9329	70.4984	26.9029	1.3851	0.0049132	0.026174	LOC113219378	NW_020555902.1	97	4125	-	4029	rRNA	large subunit ribosomal RNA	-
408898	855.099	803.494	796.83	501.981	467.944	666.756	818.474	545.56	0.585335	0.00491924	0.0261917	LOC408898	NC_037644.1	13964690	14003680	+	5888	protein_coding	uncharacterized LOC408898%2C transcript variant X2	-
725401	261.439	244.968	401.827	165.008	192.9	180.393	302.745	179.433	0.757002	0.00497551	0.0264767	LOC725401	NC_037640.1	11988212	11989241	+	760	protein_coding	U6 snRNA-associated Sm-like protein LSm3	LSM
551549	4874.86	4115.45	3592.56	2094.4	2244.65	3377.63	4194.29	2572.23	0.705342	0.00499196	0.0265351	LOC551549	NC_037649.1	3069338	3072314	-	2185	protein_coding	transmembrane 9 superfamily member 3	-
409405	923.598	1320.65	1082.63	821.062	721.759	587.024	1108.96	709.948	0.643427	0.00500444	0.0265868	LOC409405	NC_037651.1	10651963	10653206	-	912	protein_coding	baculoviral IAP repeat-containing protein 5	BIR
727300	518.311	742.524	517.854	339.955	360.88	425.567	592.896	375.467	0.658709	0.00502792	0.0266822	LOC727300	NC_037639.1	8162978	8163904	-	639	protein_coding	low molecular weight phosphotyrosine protein phosphatase%2C transcript variant X2	LMWPc
551671	107.316	128.472	122.852	74.5516	77.5291	64.7819	119.546	72.2875	0.726077	0.00505854	0.0267859	LOC551671	NC_037638.1	15198586	15199661	+	710	protein_coding	probable oligoribonuclease	Exonuc_X-T
novel.295	367.613	390.859	472.638	166.996	179.055	327.896	410.37	224.649	0.870428	0.00518003	0.0273095	-	NC_037645.1	9455682	9458134	-	789	-	-	-
102655131	47.9495	58.7922	145.033	27.8326	14.7674	43.8524	83.925	28.8175	1.55002	0.00522504	0.0275168	LOC102655131	NC_037651.1	2528580	2554386	+	2492	protein_coding	zinc finger protein 300-like	zf-C2H2
551710	8368.33	7586.37	6308.09	5453.2	5204.6	5180.56	7420.93	5279.46	0.491093	0.00527646	0.0277574	LOC551710	NC_037653.1	4646076	4647936	+	1344	protein_coding	electron transfer flavoprotein subunit alpha%2C mitochondrial	-
410895	1494.43	1515.53	1716.51	1141.14	1196.16	1160.09	1575.49	1165.8	0.434856	0.00528855	0.0278059	LOC410895	NC_037639.1	5660899	5727162	+	6349	protein_coding	pleckstrin homology-like domain family B member 1%2C transcript variant X3	PH
410740	482.92	445.297	474.344	328.027	299.964	359.789	467.52	329.26	0.506276	0.00538901	0.0282572	LOC410740	NC_037638.1	7146095	7150797	+	1902	protein_coding	RING finger protein 121%2C transcript variant X1	-
412769	691.843	732.725	789.152	462.22	539.935	563.105	737.906	521.753	0.500537	0.00544193	0.0285038	LOC412769	NC_037646.1	6860057	6861488	-	774	protein_coding	protein archease-like	-
552553	759.2	780.63	902.619	537.766	592.544	610.943	814.15	580.418	0.488934	0.0055034	0.0287946	LOC552553	NC_037652.1	1749409	1750324	-	560	protein_coding	huntingtin-interacting protein K	-
551720	1303.77	1050.64	1354.78	688.857	778.06	973.722	1236.4	813.546	0.604133	0.00552195	0.0288707	LOC551720	NC_037645.1	11986436	11993665	+	1580	protein_coding	activator of 90 kDa heat shock protein ATPase homolog 1	-
novel.251	135.857	121.939	29.8598	25.8446	27.689	44.849	95.8854	32.7942	1.54427	0.00552691	0.0288707	-	NC_037644.1	10596996	10602249	+	4241	-	-	-
725498	431.545	143.714	290.92	93.438	23.9971	161.457	288.726	92.9639	1.63591	0.0055369	0.0289073	LOC725498	NC_037649.1	1140523	1150624	+	1503	protein_coding	protein mesh%2C transcript variant X2	-
406131	3833.68	6031.65	10936.4	3164.96	4174.57	2975.98	6933.89	3438.51	1.01198	0.00554711	0.0289294	Hbg3	NC_037643.1	4602439	4613520	+	1828	protein_coding	alpha-glucosidase	-
412835	235.181	243.879	417.184	158.049	189.208	161.457	298.748	169.571	0.819393	0.00559707	0.0291428	LOC412835	NC_037645.1	6638496	6653476	-	2480	protein_coding	uncharacterized LOC412835	-
550656	1018.36	781.719	1161.97	605.359	663.612	692.668	987.349	653.88	0.595106	0.00560469	0.0291525	LOC550656	NC_037648.1	572330	578300	+	1928	protein_coding	splicing factor U2AF 50 kDa subunit%2C transcript variant X1	RRM_1
551553	594.802	676.11	551.979	476.136	347.958	392.678	607.631	405.591	0.583022	0.00560498	0.0291525	LOC551553	NC_037645.1	9354381	9367495	+	2907	protein_coding	facilitated trehalose transporter Tret1	Sugar_tr
411132	399.579	904.747	755.879	394.626	397.798	331.883	686.735	374.769	0.874118	0.00563538	0.0292634	Tg	NC_037642.1	13519267	13531278	+	3021	protein_coding	transglutaminase%2C transcript variant X2	Transglut_core
408418	3662.43	3792.1	3590	2983.06	2484.62	2717.85	3681.51	2728.51	0.432205	0.00563928	0.0292679	LOC408418	NC_037650.1	4561828	4565118	+	2162	protein_coding	AP-2 complex subunit mu	Adap_comp_sub
408734	85.6241	115.407	98.9639	56.6592	56.3009	61.792	99.9983	58.2507	0.780408	0.0056649	0.0293694	LOC408734	NC_037640.1	11689358	11698726	+	4216	protein_coding	succinate dehydrogenase [ubiquinone] flavoprotein subunit%2C mitochondrial%2C transcript variant X1	-
408462	430.404	290.695	547.714	276.338	204.898	249.161	422.937	243.466	0.798411	0.00570069	0.0294912	LOC408462	NC_037651.1	8019082	8044621	+	5453	protein_coding	uncharacterized LOC408462%2C transcript variant X1	-
409926	1736.46	1726.75	1734.43	924.44	1092.79	1428.19	1732.54	1148.47	0.593226	0.00570364	0.0294912	LOC409926	NC_037638.1	9256940	9258753	-	884	protein_coding	39S ribosomal protein L12%2C mitochondrial	-
408936	9319.33	9524.34	17856.2	5472.09	6655.5	8224.32	12233.3	6783.97	0.85068	0.00579131	0.029801	LOC408936	NC_037644.1	8420234	8431677	-	2465	protein_coding	RNA-binding protein squid%2C transcript variant X6	RRM_1
552838	1435.06	1515.53	1331.75	1052.67	943.271	1118.24	1427.45	1038.06	0.45943	0.00580746	0.0298524	LOC552838	NC_037648.1	15160222	15161358	-	901	protein_coding	26S proteasome non-ATPase regulatory subunit 8	-
411983	1463.6	751.234	1281.41	693.827	721.759	650.809	1165.42	688.798	0.758721	0.00581951	0.0298984	LOC411983	NC_037638.1	14072364	14078430	-	2121	protein_coding	putative fatty acyl-CoA reductase%2C transcript variant X4	NAD_binding_4
100576542	270.572	304.849	255.941	184.888	154.135	205.309	277.121	181.444	0.610946	0.00582611	0.0299005	LOC100576542	NC_037651.1	5217975	5218943	-	546	protein_coding	protein POLR1D%2C transcript variant X1	-
551660	2007.03	1907.48	1777.94	1318.07	1334.61	1524.87	1897.48	1392.52	0.446209	0.00586116	0.0300167	LOC551660	NC_037643.1	17761870	17763035	-	767	protein_coding	NADH dehydrogenase [ubiquinone] 1 beta subcomplex subunit 8%2C mitochondrial	-
724645	6.84993	13.0649	20.4753	0.994021	1.84593	3.98658	13.4634	2.27551	2.58045	0.00589698	0.0301842	LOC724645	NC_037650.1	10659019	10676413	-	1985	protein_coding	uncharacterized LOC724645%2C transcript variant X2	-
724768	665.585	713.128	577.574	496.017	439.332	438.524	652.095	457.957	0.509133	0.00590449	0.0301906	LOC724768	NC_037648.1	578533	581008	-	442	protein_coding	uncharacterized LOC724768	-
727612	339.071	349.487	360.877	260.434	218.743	252.151	349.812	243.776	0.52207	0.00594407	0.0303202	LOC727612	NC_037649.1	8656051	8657620	+	856	protein_coding	PITH domain-containing protein GA19395%2C transcript variant X2	-
409832	12001.1	10922.3	10500.4	7472.06	8540.2	8694.73	11141.3	8235.66	0.435905	0.0059904	0.0304848	LOC409832	NC_037638.1	14846347	14847647	-	738	protein_coding	60S ribosomal protein L18a	-
552665	1447.62	1129.03	1022.06	692.833	826.977	868.078	1199.57	795.963	0.591142	0.0060211	0.0305928	LOC552665	NC_037645.1	10535324	10537797	-	1343	protein_coding	quinone oxidoreductase-like protein 2-like	ADH_N
412933	578.819	645.626	784.886	436.375	481.788	459.453	669.777	459.206	0.54563	0.00604338	0.030685	LOC412933	NC_037643.1	5154658	5156326	+	1489	protein_coding	geranylgeranyl transferase type-1 subunit beta%2C transcript variant X1	-
551912	796.875	849.221	894.087	618.281	648.845	608.95	846.728	625.359	0.437611	0.00608803	0.0308841	LOC551912	NC_037638.1	21731326	21734549	-	1392	protein_coding	c-Myc-binding protein%2C transcript variant X3	-
100578551	600.51	549.816	579.28	215.703	216.897	477.393	576.535	303.331	0.926921	0.00611318	0.0309082	LOC100578551	NC_037638.1	22776969	22777477	+	423	protein_coding	39S ribosomal protein L34%2C mitochondrial	-
100578061	23.9747	46.816	29.8598	10.9342	13.8445	13.953	33.5502	12.9106	1.37579	0.00611835	0.0309082	LOC100578061	NC_037648.1	6465966	6466790	+	604	protein_coding	late cornified envelope-like proline-rich protein 1	-
726277	141.565	135.004	160.39	58.6473	92.2966	99.6645	145.653	83.5361	0.802855	0.00612705	0.030936	LOC726277	NC_037652.1	1552670	1553916	-	480	protein_coding	anaphase-promoting complex subunit CDC26%2C transcript variant X2	-
novel.320	55.9411	94.7208	27.3004	27.8326	15.6904	20.9295	59.3207	21.4842	1.46188	0.00617375	0.0311032	-	NC_037647.1	3047753	3058683	+	841	-	-	-
726782	368.754	329.89	418.037	276.338	252.893	209.295	372.227	246.175	0.597504	0.00617626	0.0311032	LOC726782	NC_037649.1	9161000	9162296	+	666	protein_coding	PEST proteolytic signal-containing nuclear protein	-
551354	259.156	247.145	258.5	158.049	174.44	189.363	254.934	173.951	0.55161	0.00622128	0.0312974	LOC551354	NC_037638.1	11485404	11486356	-	629	protein_coding	exocyst complex component 4	-
100576457	528.586	536.751	814.746	284.29	304.579	480.383	626.694	356.417	0.815385	0.00623699	0.0313208	LOC100576457	NC_037653.1	1496832	1497717	+	636	protein_coding	probable ribosome biogenesis protein RLP24	-
novel.49	54.7994	53.3485	46.9225	11.9283	15.6904	34.8826	51.6901	20.8337	1.31193	0.00625996	0.0313939	-	NC_037638.1	4698883	4701031	-	1773	-	-	-
725165	489.77	611.875	493.966	184.888	431.948	218.265	531.87	278.367	0.933137	0.00627861	0.0314129	LOC725165	NC_037639.1	9974540	9977908	-	1257	protein_coding	aquaporin AQPAe.a%2C transcript variant X2	-
725215	21.6914	20.6861	116.88	7.95217	20.3052	9.96645	53.0858	12.7413	2.06256	0.00628049	0.0314129	LOC725215	NC_037642.1	13205306	13213175	-	1955	protein_coding	venom acid phosphatase Acph-1%2C transcript variant X2	Acid_phosphat_A
726857	85.6241	54.4372	142.474	41.7489	48.9172	37.8725	94.1784	42.8462	1.14072	0.00628067	0.0314129	LOC726857	NC_037640.1	4508125	4509684	+	1102	protein_coding	MORN repeat-containing protein 3%2C transcript variant X1	-
726528	18.2665	33.7511	7.67823	1.98804	5.53779	4.98323	19.8986	4.16969	2.24124	0.00628204	0.0314129	LOC726528	NC_037652.1	1895082	1900039	+	2415	protein_coding	nuclear factor interleukin-3-regulated protein	bZIP_2
412863	114.165	129.561	112.614	62.6233	75.6832	78.735	118.78	72.3472	0.713981	0.00628495	0.0314129	LOC412863	NC_037647.1	4700579	4797555	+	4814	protein_coding	histone demethylase UTY	JmjC
novel.28	28.5414	3.26623	29.0067	0	0.922966	5.97987	20.2714	2.30095	3.1503	0.00628648	0.0314129	-	NC_037638.1	15529937	15531566	+	1537	-	-	-
410989	235.181	268.92	422.303	179.918	195.669	164.446	308.801	180.011	0.78098	0.00630683	0.031482	LOC410989	NC_037641.1	12100595	12105841	+	4985	protein_coding	menin	-
409377	12410.9	11268.5	12088.9	6795.13	8310.38	9696.36	11922.8	8267.29	0.528237	0.0063283	0.0315567	LOC409377	NC_037652.1	9083940	9090572	+	3320	protein_coding	transitional endoplasmic reticulum ATPase TER94	AAA
novel.472	29.683	42.461	69.9572	13.9163	11.9986	26.9094	47.3671	17.6081	1.43803	0.00633477	0.0315726	-	NC_037652.1	2501316	2505026	-	1550	-	-	-
409928	472.645	370.173	570.749	203.774	327.653	305.97	471.189	279.132	0.755913	0.00634617	0.0316131	LOC409928	NC_037643.1	7322449	7435261	-	4500	protein_coding	RNA polymerase II elongation factor Ell%2C transcript variant X1	-
413971	905.332	766.476	1005.85	575.538	618.387	670.742	892.552	621.556	0.52267	0.00638044	0.0316496	LOC413971	NC_037643.1	6476579	6479682	-	2539	protein_coding	BTB/POZ domain-containing protein 1%2C transcript variant X2	BTB
726165	229.473	342.955	434.247	154.073	143.983	243.181	335.558	180.412	0.897382	0.00638149	0.0316496	LOC726165	NC_037645.1	6950263	6963679	-	2797	protein_coding	fork head domain transcription factor slp1%2C transcript variant X3	Fork_head
725653	1665.67	1589.57	1191.83	920.464	909.121	1133.19	1482.36	987.59	0.585479	0.00638413	0.0316496	LOC725653	NC_037647.1	4859449	4861756	-	1076	protein_coding	pseudouridine-5'-phosphatase%2C transcript variant X1	-
413708	947.573	918.901	730.285	559.634	627.617	620.91	865.586	602.72	0.521209	0.00638783	0.0316496	LOC413708	NC_037640.1	3217171	3219482	-	1254	protein_coding	delta-aminolevulinic acid dehydratase%2C transcript variant X2	-
408718	1745.59	1012.53	521.267	694.821	412.566	249.161	1093.13	452.183	1.27308	0.0063885	0.0316496	LOC408718	NC_037639.1	4691312	4715031	+	8338	protein_coding	leukocyte tyrosine kinase receptor%2C transcript variant X4	Pkinase_Tyr
102656263	541.144	541.106	470.078	296.218	382.108	379.722	517.443	352.683	0.551997	0.00639264	0.0316496	LOC102656263	NC_037652.1	7568072	7569225	+	789	protein_coding	protein farnesyltransferase subunit beta	-
726252	595.944	1065.88	1116.76	448.304	558.394	605.96	926.194	537.553	0.785459	0.0064013	0.0316594	LOC726252	NC_037640.1	9469876	9518749	-	10737	protein_coding	titin%2C transcript variant X2	-
725210	167.823	146.981	142.474	87.4739	90.4506	109.631	152.426	95.8518	0.668136	0.00640734	0.0316731	LOC725210	NC_037642.1	3632006	3633063	+	882	protein_coding	protein UXT homolog	-
725023	377.888	393.037	415.478	276.338	292.58	282.051	395.467	283.656	0.480042	0.00649111	0.0320082	LOC725023	NC_037645.1	11643315	11647189	+	2214	protein_coding	mediator of RNA polymerase II transcription subunit 26%2C transcript variant X2	-
410663	812.858	789.34	723.46	494.029	497.478	629.88	775.219	540.462	0.520178	0.00650246	0.032045	LOC410663	NC_037638.1	124106	125085	-	674	protein_coding	selenoprotein F%2C transcript variant X2	-
725620	747.784	698.974	716.635	498.005	501.17	575.064	721.131	524.746	0.458681	0.00651222	0.0320604	LOC725620	NC_037651.1	2452821	2453707	+	766	protein_coding	28S ribosomal protein S33%2C mitochondrial	-
409057	1564.07	763.21	543.448	512.915	515.015	364.772	956.908	464.234	1.0428	0.00653153	0.0321391	LOC409057	NC_037647.1	4884432	4892750	+	2141	protein_coding	uncharacterized LOC409057%2C transcript variant X2	-
724580	122.157	138.271	130.53	100.396	56.3009	57.8054	130.319	71.5008	0.867505	0.00653707	0.03215	LOC724580	NC_037648.1	9448938	9455187	-	631	protein_coding	uncharacterized LOC724580	-
551629	696.409	669.578	593.783	420.471	506.708	459.453	653.257	462.211	0.498035	0.00654956	0.0321904	LOC551629	NC_037641.1	2820754	2826117	-	5364	protein_coding	isoleucine--tRNA ligase%2C cytoplasmic	-
113219358	76.4908	64.2359	29.8598	21.8685	29.5349	9.96645	56.8622	20.4566	1.46573	0.00655571	0.0321904	LOC113219358	NW_020555855.1	557	1523	-	888	protein_coding	uncharacterized LOC113219358	-
408540	4082.56	3818.23	3746.98	1843.91	2550.15	3116.51	3882.59	2503.52	0.633019	0.0065586	0.0321904	Tpx-3	NC_037652.1	4365484	4366905	+	1194	protein_coding	thioredoxin peroxidase 3%2C transcript variant 1	-
410533	2734.26	2052.28	1064.71	1007.94	1102.02	1042.49	1950.42	1050.82	0.891845	0.00662306	0.0324096	LOC410533	NC_037651.1	8750325	8751974	-	1236	protein_coding	ceramide-1-phosphate transfer protein%2C transcript variant X2	-
408605	16253.7	15811.8	20945.4	6427.34	10828.2	13318.2	17670.3	10191.2	0.794015	0.00662336	0.0324096	Hsc70-5	NC_037638.1	26843272	26847829	+	2744	protein_coding	heat shock protein cognate 5	HSP70
409992	600.51	574.857	784.886	446.316	462.406	425.567	653.418	444.763	0.55614	0.00663193	0.0324351	LOC409992	NC_037645.1	6972337	6976482	+	3325	protein_coding	importin-13	-
102656224	2460.27	2382.17	2354.66	1216.68	1732.41	1858.74	2399.03	1602.61	0.581945	0.0066459	0.0324359	LOC102656224	NC_037638.1	19464540	19467231	-	1135	protein_coding	uncharacterized LOC102656224	-
novel.431	843.683	925.433	741.376	513.909	481.788	674.729	836.831	556.809	0.587541	0.00664721	0.0324359	-	NC_037650.1	9106027	9108420	-	2394	-	-	-
408844	3238.87	2152.45	1643.99	1487.06	1460.13	1211.92	2345.11	1386.37	0.757984	0.00664888	0.0324359	LOC408844	NC_037642.1	10350056	10438356	-	7036	protein_coding	dual specificity protein phosphatase 10%2C transcript variant X1	DSPc
552214	795.733	763.21	1076.66	502.975	612.849	621.907	878.534	579.243	0.601742	0.00667022	0.0325003	LOC552214	NC_037645.1	5882799	5883927	+	965	protein_coding	nucleolar protein 16	-
727008	829.983	963.539	1174.77	637.168	715.298	675.725	989.43	676.064	0.550211	0.00667216	0.0325003	LOC727008	NC_037651.1	9406063	9410790	+	4062	protein_coding	probable ATP-dependent RNA helicase DDX46	DEAD
551910	175.815	97.987	286.654	10.9342	36.9186	111.624	186.819	53.159	1.81498	0.00670084	0.0325775	LOC551910	NC_037650.1	625204	639123	+	2231	protein_coding	farnesyl pyrophosphate synthase%2C transcript variant X1	-
100577242	1963.65	1455.65	1648.26	984.081	1359.53	949.803	1689.19	1097.8	0.6214	0.00670098	0.0325775	LOC100577242	NC_037640.1	4970241	5008975	-	5656	protein_coding	sterile alpha and TIR motif-containing protein 1	-
409854	31369.2	34523	44952.6	20717.4	26815.8	26204.8	36948.3	24579.3	0.58808	0.00674486	0.0327501	LOC409854	NC_037653.1	1077343	1086629	-	4423	protein_coding	nuclease-sensitive element-binding protein 1%2C transcript variant X4	-
410072	3295.96	2779.57	2449.36	1756.44	1887.46	2216.54	2841.63	1953.48	0.540451	0.00675088	0.0327501	LOC410072	NC_037640.1	12273901	12275868	+	1165	protein_coding	26S proteasome non-ATPase regulatory subunit 14	Mov34
410227	2261.62	2466.01	1975.01	1731.59	1321.69	1605.6	2234.21	1552.96	0.524647	0.00678105	0.0328322	LOC410227	NC_037647.1	6374119	6376293	+	1305	protein_coding	inactive hydroxysteroid dehydrogenase-like protein 1%2C transcript variant X1	adh_short
410681	541.144	497.556	931.625	333.991	421.795	385.702	656.775	380.496	0.788662	0.00683157	0.0330234	RCC1	NC_037638.1	20143681	20146438	-	2117	protein_coding	regulator of chromosome condensation 1	-
724829	688.418	859.02	800.242	593.431	552.856	524.235	782.56	556.841	0.491253	0.00684017	0.0330358	LOC724829	NC_037650.1	4843404	4846447	+	797	protein_coding	immediate early response 3-interacting protein 1	-
100576986	10.2749	50.0823	29.0067	3.97609	11.0756	7.97316	29.7879	7.67494	1.95318	0.00685549	0.0330881	LOC100576986	NC_037639.1	14032414	14043752	-	7423	protein_coding	uncharacterized LOC100576986%2C transcript variant X2	-
409736	7120.5	7455.72	6479.57	5498.93	5067.08	3767.32	7018.6	4777.78	0.554785	0.00685786	0.0330881	LOC409736	NC_037650.1	10949823	10956772	-	2020	protein_coding	methylmalonate-semialdehyde dehydrogenase [acylating]-like protein%2C transcript variant X1	Aldedh
102654736	162.115	174.199	191.103	113.318	127.369	96.6746	175.806	112.454	0.645364	0.00690842	0.0332823	LOC102654736	NC_037641.1	6706110	6709396	+	2576	protein_coding	zinc finger protein 239	-
551133	456.662	414.812	485.435	294.23	336.882	328.893	452.303	320.002	0.499728	0.00693193	0.0333623	LOC551133	NC_037646.1	10066545	10068358	+	1092	protein_coding	methyltransferase-like protein 6%2C transcript variant X1	-
413558	784.317	468.16	19.6221	57.6532	4.61483	2.98994	424.033	21.7527	4.28537	0.00697919	0.033523	LOC413558	NC_037638.1	16735551	16756342	+	2480	protein_coding	photoreceptor-specific nuclear receptor%2C transcript variant X2	zf-C4
552494	4251.52	4889.55	4804.01	3144.09	3050.4	3825.12	4648.36	3339.87	0.477028	0.00698514	0.0335349	LOC552494	NC_037645.1	2616124	2617451	+	592	protein_coding	60S ribosomal protein L37	-
100577441	55.9411	32.6623	61.4258	23.8565	23.9971	20.9295	50.0098	22.9277	1.12862	0.00701426	0.0336401	LOC100577441	NC_037647.1	4555241	4558133	+	1866	protein_coding	uncharacterized LOC100577441	-
100578852	75.3492	63.1472	84.4605	38.7668	47.9942	33.8859	74.319	40.2157	0.886773	0.00701749	0.0336401	LOC100578852	NC_037647.1	7735251	7738403	+	2965	protein_coding	ribonucleases P/MRP protein subunit POP1	-
409355	1628	2091.48	1843.63	1099.39	1371.53	1388.33	1854.37	1286.41	0.52756	0.00706992	0.0338244	LOC409355	NC_037652.1	3491262	3492418	+	805	protein_coding	glutaredoxin 3	-
113218956	99.3239	71.8571	76.7823	46.719	44.3023	48.8356	82.6545	46.619	0.824186	0.00717411	0.0342212	LOC113218956	NC_037645.1	9367581	9368139	-	490	protein_coding	uncharacterized LOC113218956	-
411277	2326.69	2652.18	2692.5	1656.04	2033.29	1877.68	2557.12	1855.67	0.462652	0.00718426	0.0342528	LOC411277	NC_037645.1	8333888	8432032	+	13144	protein_coding	uncharacterized LOC411277%2C transcript variant X3	-
726316	2456.84	2455.12	2368.31	1089.45	1443.52	2009.24	2426.76	1514.07	0.680601	0.00724148	0.0345085	LOC726316	NC_037638.1	2492814	2493891	-	563	protein_coding	cytochrome b-c1 complex subunit 6%2C mitochondrial	-
552608	14.8415	38.1061	45.2162	11.9283	11.0756	10.9631	32.7213	11.3223	1.5396	0.00728425	0.0346953	LOC552608	NC_037641.1	93889	142196	+	7290	protein_coding	uncharacterized LOC552608%2C transcript variant X1	-
552401	1221.57	1443.68	1784.76	872.751	1122.33	961.763	1483.34	985.613	0.590148	0.00729061	0.0346986	LOC552401	NC_037646.1	6007533	6017656	-	2635	protein_coding	protein cueball	-
724869	156.407	131.738	110.908	87.4739	69.2224	82.7215	133.018	79.8059	0.734652	0.00729248	0.0346986	LOC724869	NC_037644.1	12507716	12508235	-	520	protein_coding	histone H2B	Histone
novel.25	20.5498	20.6861	5.97196	2.98206	2.7689	3.98658	15.736	3.24585	2.26721	0.00729752	0.0346986	-	NC_037638.1	12494862	12496533	+	1230	-	-	-
411734	964.698	891.682	595.489	465.202	468.866	596.99	817.29	510.353	0.678531	0.0072993	0.0346986	LOC411734	NC_037648.1	15144847	15150064	+	3692	protein_coding	valine--tRNA ligase%2C transcript variant X1	-
724608	50.2328	25.0411	31.5661	20.8744	6.46076	6.97652	35.6133	11.4372	1.64024	0.00731844	0.0347725	LOC724608	NC_037642.1	12749226	12758549	+	3717	protein_coding	transient receptor potential%2C transcript variant X1	Ion_trans
409913	559.411	452.918	577.574	270.374	398.721	361.782	529.967	343.626	0.625097	0.007372	0.0349925	LOC409913	NC_037644.1	3739216	3754819	+	887	protein_coding	COMM domain-containing protein 4	-
726021	1478.44	2169.87	2573.06	1242.53	1298.61	1410.25	2073.79	1317.13	0.655269	0.00737811	0.0349996	LOC726021	NC_037653.1	5164420	5206450	-	5309	protein_coding	uncharacterized LOC726021%2C transcript variant X2	-
novel.386	624.485	592.277	661.181	183.894	316.577	493.339	625.981	331.27	0.918308	0.00738586	0.0349996	-	NC_037648.1	14186584	14198814	-	6766	-	-	-
[truncated: 138 more rows]

## Sheet: 4Qvs4W_down
gene_id	4Q1	4Q2	4Q3	4w1	4w2	4w3	4Q	4w	log2FoldChange	pvalue	padj	gene_name	gene_chr	gene_start	gene_end	gene_strand	gene_length	gene_biotype	gene_description	tf_family
[truncated: 951 more rows]
