# Supplementary material for: The diverging epigenomic landscapes of honeybee queens and workers revealed by multiomic sequencing
Source: Research Square preprint supplement (doi:10.21203/rs.3.rs-1629662/v1), 2022-05-11
Supplement: Supplementary file 9 [file c90ce3da05b6e57e5cb5c7eb.xlsx]

## Sheet: unique peaks for 4Q
Chromosome	PeakStart	PeakEnd	oriSummitPos	Count_4Q1	Count_4Q2	Count_4Q3	Count_4w1	Count_4w2	Count_4w3	RPM_4Q1	RPM_4Q2	RPM_4Q3	RPM_4w1	RPM_4w2	RPM_4w3	FoldEnrich_4Q1	FoldEnrich_4Q2	FoldEnrich_4Q3	FoldEnrich_4w1	FoldEnrich_4w2	FoldEnrich_4w3	log2foldchange	pvalue	qvalue	In_4Q1	In_4Q2	In_4Q3	In_4w1	In_4w2	In_4w3	annotation	geneStart	geneEnd	geneLength	geneStrand	geneId	transcriptId	distanceToTSS	ClosestTSS_GO
NC_037641.1	5032548	5033350	5032653;5033173;5032857;5033255;5033233	741	802	882	612	422	383	9.3863	10.4069	12.5298	8.52683	5.73165	6.65472	2.63297	2.91926	3.51476	2.39188	1.60779	1.86673	0.628147	0.0379321	1	+	+	+	-	-	-	Promoter (2-3kb)	5029485	5035661	6177	2	406088	NM_001011578.1	2311	GO:0005319::lipid transporter activity;GO:0005576::extracellular region;GO:0005737::cytoplasm;GO:0006084::acetyl-CoA metabolic process;GO:0006869::lipid transport;GO:0007155::cell adhesion;GO:0008814::citrate CoA-transferase activity;GO:0009346::citrate lyase complex;GO:0009523::photosystem II;GO:0015979::photosynthesis;GO:0016020::membrane;GO:0030193::regulation of blood coagulation
NC_037648.1	12485534	12485958	12485754;12485716;12485747	1314	1281	1201	531	428	396	16.6348	16.6147	17.0564	7.40012	5.81295	6.88001	8.81648	8.80583	9.03993	3.92208	3.08088	3.64642	1.32403	0.000980114	1	+	+	+	-	-	-	Intron (XM_026443842.1/408354, intron 1 of 5)	12474564	12496655	22092	1	408354	#NAME?	10970	GO:0003677::DNA binding;GO:0003700::sequence-specific DNA binding transcription factor activity;GO:0005515::protein binding;GO:0006355::regulation of transcription, DNA-templated;GO:0007155::cell adhesion;GO:0009405::pathogenesis;GO:0019062::virion attachment to host cell
NC_037648.1	12448745	12449017	12448855;12448866;12448863	618	641	578	328	281	260	7.83035	8.32032	8.21601	4.57639	3.8211	4.52313	6.46078	6.86505	6.77899	3.77596	3.15277	3.73201	0.915234	0.000535059	1	+	+	+	-	-	-	Promoter (1-2kb)	12447016	12496611	49596	1	408354	#NAME?	1729	GO:0003677::DNA binding;GO:0003700::sequence-specific DNA binding transcription factor activity;GO:0005515::protein binding;GO:0006355::regulation of transcription, DNA-templated;GO:0007155::cell adhesion;GO:0009405::pathogenesis;GO:0019062::virion attachment to host cell
NC_037648.1	12483524	12483822	12483655;12483642;12483644	932	827	888	572	405	381	11.8025	10.7309	12.6149	7.97043	5.5013	6.62006	8.89138	8.0841	9.5034	6.0045	4.14439	4.98721	0.806849	0.00612389	1	+	+	+	-	-	-	Intron (XM_026443842.1/408354, intron 1 of 5)	12474564	12496655	22092	1	408354	#NAME?	8960	GO:0003677::DNA binding;GO:0003700::sequence-specific DNA binding transcription factor activity;GO:0005515::protein binding;GO:0006355::regulation of transcription, DNA-templated;GO:0007155::cell adhesion;GO:0009405::pathogenesis;GO:0019062::virion attachment to host cell
NC_037650.1	11192607	11193024	11192796;11192803;11192848	331	292	356	230	217	224	4.1998	3.79728	5.06583	3.21321	2.9539	3.89925	2.26318	2.04627	2.72986	1.73153	1.59179	2.10122	0.375934	0.105269	1	+	+	+	-	-	-	Promoter (<=1kb)	11188107	11191726	3620	2	409187	#NAME?	-881	.
NC_037642.1	7549808	7550283	7550141;7549940;7550151	274	392	368	182	207	103	3.47875	5.09328	5.23611	2.54553	2.8184	1.80232	1.6462	2.41022	2.47781	1.20459	1.33371	0.852887	0.946229	0.0392246	1	+	+	+	-	-	-	Intron (XM_006564730.3/411086, intron 1 of 6)	7492476	7539140	46665	2	411086	#NAME?	-10668	GO:0005509::calcium ion binding;GO:0005515::protein binding;GO:0005634::nucleus;GO:0007154::cell communication;GO:0007219::Notch signaling pathway;GO:0007275::multicellular organismal development;GO:0016020::membrane;GO:0016021::integral component of membrane;GO:0019079::viral genome replication
NC_037641.1	3413896	3414210	3414043;3414053;3414055	490	432	376	125	141	143	6.21115	5.61168	5.34963	1.75266	1.9241	2.49552	4.44148	4.01281	3.82543	1.2533	1.37589	1.7845	1.47622	0.000454575	1	+	+	+	-	-	-	Promoter (<=1kb)	3406438	3414622	8185	2	411907	#NAME?	412	GO:0003676::nucleic acid binding
NC_037638.1	19725101	19725576	19725443;19725428;19725377	230	422	414	240	241	135	2.92215	5.48208	5.88885	3.35231	3.2791	2.35688	1.38281	2.59421	2.7867	1.58637	1.55172	1.11531	0.669198	0.189037	1	+	+	+	-	-	-	Distal Intergenic	19734755	19746500	11746	1	413500	#NAME?	-9179	GO:0005102::receptor binding;GO:0005576::extracellular region;GO:0007275::multicellular organismal development;GO:0016055::Wnt signaling pathway
NC_037644.1	7758626	7758983	7758735;7758728;7758776	241	288	238	170	220	163	3.0613	3.74544	3.39141	2.37861	2.99455	2.84212	1.92615	2.3566	2.13385	1.4966	1.88415	1.78824	0.311926	0.0714005	1	+	+	+	-	-	-	Intron (XM_016912941.2/724143, intron 8 of 11)	7788202	7813145	24944	2	724612	#NAME?	54162	GO:0008237::metallopeptidase activity;GO:0008270::zinc ion binding
NC_037644.1	7778656	7778943	7778779;7778803;7778808	209	229	236	133	106	88	2.6565	2.9808	3.36303	1.86394	1.44985	1.54237	2.0777	2.33135	2.6303	1.45783	1.13396	1.20632	0.890162	0.00779711	1	+	+	+	-	-	-	3' UTR	7788202	7813145	24944	2	724612	#NAME?	34202	GO:0008237::metallopeptidase activity;GO:0008270::zinc ion binding
NC_037650.1	5996429	5996804	5996559;5996686;5996559;5996611	473	367	316	196	303	239	5.9961	4.76928	4.49823	2.74027	4.1192	4.1592	3.59209	2.85714	2.69476	1.64162	2.4677	2.49166	0.470146	0.0971143	1	+	+	+	-	-	-	Promoter (<=1kb)	5993703	5997742	4040	2	726352	#NAME?	938	GO:0004252::serine-type endopeptidase activity;GO:0006508::proteolysis
NC_037642.1	13099781	13100170	13099880;13099897;13100019	600	348	295	409	386	317	7.60265	4.52304	4.20024	5.7031	5.24385	5.51094	4.39103	2.61236	2.42592	3.29392	3.02867	3.18293	-0.0116142	0.971446	1	+	+	+	-	-	-	Promoter (<=1kb)	13099989	13102327	2339	1	726703	#NAME?	0	GO:0003993::acid phosphatase activity
NC_037652.1	6339222	6339503	6339345;6339368;6339349	185	215	196	119	130	66	2.3529	2.79936	2.79543	1.6692	1.77505	1.16111	1.87941	2.23602	2.23288	1.33329	1.41784	0.927451	0.787222	0.0111971	1	+	+	+	-	-	-	Promoter (<=1kb)	6339308	6402471	63164	1	406070	#NAME?	0	GO:0004930::G-protein coupled receptor activity;GO:0007186::G-protein coupled receptor signaling pathway;GO:0016021::integral component of membrane
NC_037652.1	6362279	6363473	6362530;6362849;6362677;6362500;6362978	793	1091	1101	437	485	287	10.0441	14.1523	15.6374	6.09258	6.5853	4.99104	1.89326	2.66763	2.94756	1.14842	1.24129	0.940783	1.17278	0.0392662	1	+	+	+	-	-	-	5' UTR	6341538	6401920	60383	1	406070	NM_001011567.1	20741	GO:0004930::G-protein coupled receptor activity;GO:0007186::G-protein coupled receptor signaling pathway;GO:0016021::integral component of membrane
NC_037645.1	470770	471095	470880;470911;470950	339	261	227	127	115	106	4.301	3.39552	3.23532	1.78048	1.5718	1.85431	2.97179	2.34615	2.23546	1.23023	1.08604	1.28124	1.07013	0.0232275	1	+	+	+	-	-	-	Intron (XM_026442017.1/406072, intron 5 of 15)	431948	502528	70581	1	406072	NM_001011568.1	38822	GO:0005216::ion channel activity;GO:0006811::ion transport;GO:0008649::rRNA methyltransferase activity;GO:0009297::pilus assembly;GO:0016020::membrane;GO:0019867::outer membrane;GO:0055085::transmembrane transport;GO:0070475::rRNA base methylation
NC_037653.1	3967405	3967697	3967548;3967544;3967542	626	658	504	112	157	182	7.93155	8.54064	7.16595	1.57183	2.1409	3.17139	6.09757	6.56582	5.509	1.20838	1.64587	2.43808	1.77977	0.00091437	1	+	+	+	-	-	-	Intron (XM_016916895.2/406077, intron 1 of 3)	3973855	4037081	63227	1	406077	#NAME?	-6158	GO:0003677::DNA binding;GO:0004190::aspartic-type endopeptidase activity;GO:0015743::malate transport;GO:0016021::integral component of membrane
NC_037653.1	3952601	3952988	3952739;3952776;3952764	561	617	519	637	661	381	7.1093	8.00928	7.3788	8.87458	8.9701	6.62006	4.12726	4.64974	4.28371	5.15208	5.20753	3.84323	-0.120947	0.490038	1	+	+	+	-	-	-	Promoter (<=1kb)	3952850	4037081	84232	1	406077	#NAME?	0	GO:0003677::DNA binding;GO:0004190::aspartic-type endopeptidase activity;GO:0015743::malate transport;GO:0016021::integral component of membrane
NC_037652.1	7732285	7733028	7732487;7732499;7732490	1723	1753	1798	1033	1137	934	21.8086	22.7318	25.5278	14.3829	15.4199	16.2035	6.6027	6.8822	7.72871	4.35452	4.66848	4.90572	0.606928	0.00870072	1	+	+	+	-	-	-	Promoter (1-2kb)	7734777	7737849	3073	1	406078	NM_001011572.1	-1749	.
NC_037652.1	7731601	7731892	7731746;7731732;7731740	1082	760	739	235	236	175	13.6999	9.86256	10.5006	3.28276	3.21135	3.05008	10.5682	7.60805	8.10024	2.53234	2.47726	2.35285	1.83551	0.0201631	1	+	+	+	-	-	-	Promoter (2-3kb)	7734777	7737849	3073	1	406078	NM_001011572.1	-2885	.
NC_037642.1	11685067	11685475	11685302;11685330;11685160	352	486	441	294	270	175	4.46545	6.31152	6.27198	4.10345	3.67205	3.05008	2.45928	3.47598	3.4542	2.25992	2.02233	1.67979	0.655239	0.0569287	1	+	+	+	-	-	-	Exon (NM_001011574.1/406081, exon 8 of 9)	11679274	11685664	6391	1	406081	NM_001011574.1	5793	GO:0016117::carotenoid biosynthetic process;GO:0016491::oxidoreductase activity;GO:0016614::oxidoreductase activity, acting on CH-OH group of donors;GO:0016705::oxidoreductase activity, acting on paired donors, with incorporation or reduction of molecular oxygen;GO:0050660::flavin adenine dinucleotide binding;GO:0055114::oxidation-reduction process
NC_037642.1	11675760	11676396	11675855;11676235;11676233;11676236	981	949	859	564	480	317	12.4223	12.312	12.2034	7.85915	6.51755	5.51094	4.39268	4.35367	4.31527	2.77909	2.30468	1.94873	0.893222	0.0134347	1	+	+	+	-	-	-	Promoter (2-3kb)	11679274	11685664	6391	1	406081	NM_001011574.1	-2878	GO:0016117::carotenoid biosynthetic process;GO:0016491::oxidoreductase activity;GO:0016614::oxidoreductase activity, acting on CH-OH group of donors;GO:0016705::oxidoreductase activity, acting on paired donors, with incorporation or reduction of molecular oxygen;GO:0050660::flavin adenine dinucleotide binding;GO:0055114::oxidation-reduction process
NC_037645.1	9674038	9674401	9674214;9674217;9674218	498	593	551	417	381	261	6.31235	7.69824	7.83288	5.81438	5.1761	4.54046	3.90622	4.76383	4.84715	3.59806	3.20308	2.80973	0.492057	0.0291057	1	+	+	+	-	-	-	Intron (XM_016913298.2/406084, intron 1 of 5)	9678910	9747721	68812	1	406084	#NAME?	-4509	GO:0003700::sequence-specific DNA binding transcription factor activity;GO:0005634::nucleus;GO:0006270::DNA replication initiation;GO:0006355::regulation of transcription, DNA-templated;GO:0008270::zinc ion binding;GO:0016032::viral process;GO:0043401::steroid hormone mediated signaling pathway;GO:0043565::sequence-specific DNA binding
NC_037645.1	9722148	9722503	9722274;9722278;9722277	1977	1729	1509	1310	1275	1099	25.0217	22.4208	21.4269	18.236	17.2898	19.063	15.8319	14.1863	13.5574	11.5384	10.9397	12.0617	0.335258	0.0302895	1	+	+	+	-	-	-	Intron (XM_016913298.2/406084, intron 2 of 5)	9726194	9747799	21606	1	406084	NM_001159355.1	-3691	GO:0003700::sequence-specific DNA binding transcription factor activity;GO:0005634::nucleus;GO:0006270::DNA replication initiation;GO:0006355::regulation of transcription, DNA-templated;GO:0008270::zinc ion binding;GO:0016032::viral process;GO:0043401::steroid hormone mediated signaling pathway;GO:0043565::sequence-specific DNA binding
NC_037645.1	9670257	9670529	9670398;9670408;9670414	282	285	233	85	101	101	3.57995	3.70656	3.32046	1.19626	1.3821	1.76766	2.9538	3.05826	2.73969	0.987028	1.14036	1.45849	1.28725	0.000962644	1	+	+	+	-	-	-	Intron (XM_016913298.2/406084, intron 1 of 5)	9678910	9747721	68812	1	406084	#NAME?	-8381	GO:0003700::sequence-specific DNA binding transcription factor activity;GO:0005634::nucleus;GO:0006270::DNA replication initiation;GO:0006355::regulation of transcription, DNA-templated;GO:0008270::zinc ion binding;GO:0016032::viral process;GO:0043401::steroid hormone mediated signaling pathway;GO:0043565::sequence-specific DNA binding
NC_037645.1	9653637	9653952	9653773;9653794;9653787	473	569	475	228	239	276	5.9961	7.3872	6.75444	3.18539	3.252	4.80041	4.27414	5.26574	4.81469	2.27061	2.31809	3.42182	0.841542	0.0128947	1	+	+	+	-	-	-	Intron (XM_016913298.2/406084, intron 1 of 5)	9678910	9747721	68812	1	406084	#NAME?	-24958	GO:0003700::sequence-specific DNA binding transcription factor activity;GO:0005634::nucleus;GO:0006270::DNA replication initiation;GO:0006355::regulation of transcription, DNA-templated;GO:0008270::zinc ion binding;GO:0016032::viral process;GO:0043401::steroid hormone mediated signaling pathway;GO:0043565::sequence-specific DNA binding
NC_037645.1	9645830	9646166	9645998;9646001;9645998	269	376	351	122	202	167	3.4155	4.88592	4.99488	1.71093	2.75065	2.91144	2.28292	3.26575	3.33858	1.14359	1.83854	1.94601	0.850697	0.0398261	1	+	+	+	-	-	-	Intron (XM_016913298.2/406084, intron 1 of 5)	9626947	9747721	120775	1	406084	#NAME?	18883	GO:0003700::sequence-specific DNA binding transcription factor activity;GO:0005634::nucleus;GO:0006270::DNA replication initiation;GO:0006355::regulation of transcription, DNA-templated;GO:0008270::zinc ion binding;GO:0016032::viral process;GO:0043401::steroid hormone mediated signaling pathway;GO:0043565::sequence-specific DNA binding
NC_037641.1	11096552	11096948	11096699;11096680;11096699	449	449	437	458	484	297	5.6925	5.832	6.21522	6.38469	6.57175	5.16434	3.22983	3.30898	3.52641	3.62256	3.7287	2.93016	-0.0306618	0.806997	1	+	+	+	-	-	-	Promoter (<=1kb)	11096653	11102308	5656	1	406086	#NAME?	0	GO:0003677::DNA binding;GO:0003700::sequence-specific DNA binding transcription factor activity;GO:0006355::regulation of transcription, DNA-templated
NC_037642.1	7346310	7346637	7346454;7346455;7346481	260	302	364	86	72	88	3.30165	3.92688	5.17935	1.21017	0.98915	1.54237	2.26738	2.69675	3.55687	0.831073	0.679289	1.05921	1.72949	0.026923	1	+	+	+	-	-	-	Exon (XM_006564195.3/726318, exon 6 of 7)	7347727	7351941	4215	2	406098	NM_001011586.1	5304	GO:0003924::GTPase activity;GO:0005524::ATP binding;GO:0005525::GTP binding;GO:0006576::cellular biogenic amine metabolic process;GO:0015093::ferrous iron transmembrane transporter activity;GO:0015684::ferrous iron transport;GO:0016021::integral component of membrane
NC_037642.1	7347009	7347352	7347145;7347187;7347132	238	314	310	114	68	106	3.02335	4.0824	4.41309	1.59965	0.93495	1.85431	1.97969	2.67315	2.88969	1.04745	0.612204	1.2142	1.39206	0.0128885	1	+	+	+	-	-	-	3' UTR	7347727	7351941	4215	2	406098	NM_001011586.1	4589	GO:0003924::GTPase activity;GO:0005524::ATP binding;GO:0005525::GTP binding;GO:0006576::cellular biogenic amine metabolic process;GO:0015093::ferrous iron transmembrane transporter activity;GO:0015684::ferrous iron transport;GO:0016021::integral component of membrane
NC_037645.1	7421409	7421686	7421543;7421542;7421585	248	274	206	160	119	46	3.14985	3.564	2.93733	2.23951	1.626	0.81451	2.55218	2.88775	2.37999	1.81457	1.31747	0.659961	1.04419	0.0401425	1	+	+	+	-	-	-	Distal Intergenic	7426943	7561836	134894	1	406104	NM_001040230.1	-5257	GO:0004252::serine-type endopeptidase activity;GO:0005886::plasma membrane;GO:0006355::regulation of transcription, DNA-templated;GO:0008152::metabolic process;GO:0016787::hydrolase activity;GO:0019048::modulation by virus of host morphology or physiology;GO:0043401::steroid hormone mediated signaling pathway
NC_037645.1	7405961	7406333	7406059;7406248;7406254	241	269	231	164	182	110	3.0613	3.4992	3.29208	2.29515	2.47965	1.92363	1.84869	2.11313	1.98805	1.38602	1.49744	1.16166	0.556679	0.00828982	1	+	+	+	-	-	-	Distal Intergenic	7426943	7561836	134894	1	406104	NM_001040230.1	-20610	GO:0004252::serine-type endopeptidase activity;GO:0005886::plasma membrane;GO:0006355::regulation of transcription, DNA-templated;GO:0008152::metabolic process;GO:0016787::hydrolase activity;GO:0019048::modulation by virus of host morphology or physiology;GO:0043401::steroid hormone mediated signaling pathway
NC_037645.1	7415164	7415470	7415334;7415315;7415331	250	326	233	162	192	147	3.17515	4.23792	3.32046	2.26733	2.61515	2.56484	2.32966	3.10943	2.43628	1.66358	1.91878	1.88186	0.527331	0.0692998	1	+	+	+	-	-	-	Distal Intergenic	7426943	7561836	134894	1	406104	NM_001040230.1	-11473	GO:0004252::serine-type endopeptidase activity;GO:0005886::plasma membrane;GO:0006355::regulation of transcription, DNA-templated;GO:0008152::metabolic process;GO:0016787::hydrolase activity;GO:0019048::modulation by virus of host morphology or physiology;GO:0043401::steroid hormone mediated signaling pathway
NC_037651.1	4890841	4891162	4891016;4891013;4891034	210	292	246	179	177	131	2.66915	3.79728	3.50493	2.5038	2.4119	2.28756	1.86717	2.65634	2.45183	1.7515	1.68721	1.60023	0.46914	0.107511	1	+	+	+	-	-	-	Promoter (<=1kb)	4888962	4891721	2760	2	406105	NM_001134947.1	559	GO:0006508::proteolysis;GO:0008152::metabolic process;GO:0008236::serine-type peptidase activity;GO:0016787::hydrolase activity
NC_037649.1	7356173	7356838	7356314;7356524;7356804;7356524;7356521	538	388	374	230	249	153	6.81835	5.04144	5.32125	3.21321	3.3875	2.66882	2.30607	1.70509	1.79972	1.08675	1.1457	0.902634	0.890249	0.0283105	1	+	+	+	-	-	-	Promoter (<=1kb)	7357756	7366851	9096	1	406108	NM_001011592.1	-918	GO:0000276::mitochondrial proton-transporting ATP synthase complex, coupling factor F(o);GO:0015078::hydrogen ion transmembrane transporter activity;GO:0015986::ATP synthesis coupled proton transport;GO:0016021::integral component of membrane;GO:0019031::viral envelope
NC_037649.1	7359407	7359686	7359540;7359548;7359552	280	207	186	119	115	98	3.55465	2.69568	2.65353	1.6692	1.5718	1.71567	2.8596	2.16859	2.13468	1.34282	1.26446	1.3802	0.84506	0.0438356	1	+	+	+	-	-	-	Promoter (<=1kb)	7359585	7366139	6555	1	406108	#NAME?	0	GO:0000276::mitochondrial proton-transporting ATP synthase complex, coupling factor F(o);GO:0015078::hydrogen ion transmembrane transporter activity;GO:0015986::ATP synthesis coupled proton transport;GO:0016021::integral component of membrane;GO:0019031::viral envelope
NC_037650.1	9130713	9131123	9130920;9130901;9130959	237	377	314	178	184	148	3.0107	4.89888	4.46985	2.48989	2.50675	2.58217	1.65003	2.68486	2.44973	1.3646	1.37384	1.41517	0.707902	0.107022	1	+	+	+	-	-	-	Promoter (<=1kb)	9129778	9132956	3179	1	406114	NM_001011598.1	935	GO:0003824::catalytic activity;GO:0005975::carbohydrate metabolic process;GO:0043169::cation binding
NC_037646.1	10867406	10867886	10867719;10867739;10867640;10867725	1371	1550	1165	1322	1116	567	17.3558	20.101	16.5455	18.4029	15.1353	9.84344	8.12767	9.41324	7.74821	8.61802	7.08782	4.60965	0.315936	0.291787	1	+	+	+	-	-	-	5' UTR	10864307	10891001	26695	1	406123	NM_001011602.1	3099	GO:0000150::recombinase activity;GO:0003677::DNA binding;GO:0005515::protein binding;GO:0006310::DNA recombination;GO:0043565::sequence-specific DNA binding
NC_037644.1	9518975	9520792	9519085;9519670;9520407;9519163;9519688;9519652;9520411;9520422	824	1698	1160	493	604	400	10.4362	22.019	16.4746	6.87154	8.19775	6.94933	1.29305	2.72816	2.04121	0.851386	1.0157	0.861025	1.15199	0.113143	1	+	+	+	-	-	-	Intron (XM_006565102.3/406124, intron 3 of 9)	9505271	9542487	37217	1	406124	#NAME?	13704	GO:0004190::aspartic-type endopeptidase activity;GO:0004930::G-protein coupled receptor activity;GO:0005230::extracellular ligand-gated ion channel activity;GO:0005787::signal peptidase complex;GO:0006465::signal peptide processing;GO:0006810::transport;GO:0006811::ion transport;GO:0007186::G-protein coupled receptor signaling pathway;GO:0008233::peptidase activity;GO:0008565::protein transporter…
NC_037651.1	1825492	1825828	1825662;1825622;1825634	233	294	196	136	124	72	2.9601	3.8232	2.79543	1.90567	1.69375	1.26509	1.97853	2.55543	1.86847	1.27375	1.1321	0.845586	0.97754	0.0204397	1	+	+	+	-	-	-	Intron (XM_026444870.1/406148, intron 1 of 11)	1798999	2037844	238846	1	406148	NM_001011621.1	26493	GO:0003677::DNA binding;GO:0005230::extracellular ligand-gated ion channel activity;GO:0005515::protein binding;GO:0005634::nucleus;GO:0005739::mitochondrion;GO:0006355::regulation of transcription, DNA-templated;GO:0006810::transport;GO:0006811::ion transport;GO:0006952::defense response;GO:0016020::membrane;GO:0045122::aflatoxin biosynthetic process
NC_037645.1	2755469	2755812	2755630;2755627;2755637	643	715	783	464	399	436	8.1466	9.27936	11.125	6.46815	5.42	7.57321	5.33439	6.07612	7.28464	4.23534	3.54901	4.95893	0.552927	0.05269	1	+	+	+	-	-	-	3' UTR	2754403	2759443	5041	2	406154	NM_001011626.2	3631	.
NC_037647.1	11770007	11770427	11770300;11770288;11770106;11770323	309	390	357	254	253	150	3.9215	5.06736	5.08002	3.54705	3.4417	2.61683	2.09815	2.71123	2.718	1.89781	1.84144	1.4001	0.550563	0.0404849	1	+	+	+	-	-	-	Intron (XM_006569146.3/408271, intron 1 of 9)	11705264	11779163	73900	2	408271	#NAME?	8736	GO:0005096::GTPase activator activity;GO:0030695::GTPase regulator activity;GO:0051056::regulation of small GTPase mediated signal transduction
NC_037647.1	11714646	11715106	11714820;11714831;11714814	679	911	1030	413	449	295	8.602	11.8195	14.6299	5.75874	6.0975	5.12968	4.20305	5.77517	7.14837	2.8138	2.97932	2.50643	1.04513	0.0708265	1	+	+	+	-	-	-	Promoter (2-3kb)	11705264	11717516	12253	2	408271	#NAME?	2410	GO:0005096::GTPase activator activity;GO:0030695::GTPase regulator activity;GO:0051056::regulation of small GTPase mediated signal transduction
NC_037647.1	11661724	11662108	11661909;11661947;11661926	1108	868	701	150	195	188	14.0289	11.2622	9.96138	2.10041	2.6558	3.27537	8.20785	6.58914	5.82808	1.22888	1.55382	1.91631	2.13397	0.0120743	1	+	+	+	-	-	-	Promoter (<=1kb)	11656882	11661824	4943	2	408272	#NAME?	0	GO:0016021::integral component of membrane;GO:0055085::transmembrane transport
NC_037647.1	11302128	11302611	11302370;11302358;11302408	497	612	678	280	185	244	6.2997	7.94448	9.63501	3.90871	2.5203	4.24585	2.93185	3.69732	4.48408	1.81909	1.17293	1.97599	1.16154	0.0261507	1	+	+	+	-	-	-	Promoter (2-3kb)	11298457	11304861	6405	2	408276	#NAME?	2250	GO:0003676::nucleic acid binding;GO:0003677::DNA binding;GO:0004852::uroporphyrinogen-III synthase activity;GO:0005524::ATP binding;GO:0005739::mitochondrion;GO:0016787::hydrolase activity;GO:0033014::tetrapyrrole biosynthetic process
NC_037647.1	11301507	11301951	11301802;11301798;11301806	512	594	645	260	246	249	6.48945	7.7112	9.16674	3.63051	3.34685	4.3325	3.28484	3.90327	4.64004	1.8377	1.69411	2.19303	1.04692	0.0237803	1	+	+	+	-	-	-	Promoter (2-3kb)	11298457	11304861	6405	2	408276	#NAME?	2910	GO:0003676::nucleic acid binding;GO:0003677::DNA binding;GO:0004852::uroporphyrinogen-III synthase activity;GO:0005524::ATP binding;GO:0005739::mitochondrion;GO:0016787::hydrolase activity;GO:0033014::tetrapyrrole biosynthetic process
NC_037647.1	11128777	11129018	11128895;11128899;11128910	255	223	172	196	213	186	3.2384	2.90304	2.45487	2.74027	2.8997	3.24071	3.01427	2.70212	2.28497	2.55061	2.69901	3.01642	-0.0469526	0.746642	1	+	+	+	-	-	-	Intron (XM_006569194.3/408278, intron 2 of 7)	11108360	11142437	34078	2	408278	#NAME?	13419	GO:0004672::protein kinase activity;GO:0005524::ATP binding;GO:0006468::protein phosphorylation
NC_037647.1	11204381	11204705	11204499;11204507;11204576	516	527	401	172	189	155	6.54005	6.84288	5.70438	2.40643	2.5745	2.70348	4.53278	4.74266	3.95359	1.66785	1.78433	1.87373	1.31261	0.00546433	1	+	+	+	-	-	-	Intron (XM_006569195.3/408278, intron 1 of 7)	11108360	11209241	100882	2	408278	#NAME?	4536	GO:0004672::protein kinase activity;GO:0005524::ATP binding;GO:0006468::protein phosphorylation
NC_037647.1	8749736	8750197	8749900;8750052;8749970	795	771	709	556	403	256	10.0694	10.0051	10.0749	7.74787	5.4742	4.45381	4.9094	4.87805	4.91208	3.77752	2.66898	2.17148	0.770347	0.0506262	1	+	+	+	-	-	-	Exon (XM_006565991.3/408298, exon 10 of 19)	8729943	8794768	64826	1	408298	#NAME?	19793	GO:0003723::RNA binding;GO:0003968::RNA-directed RNA polymerase activity;GO:0004222::metalloendopeptidase activity;GO:0005524::ATP binding;GO:0006351::transcription, DNA-templated;GO:0006810::transport;GO:0008270::zinc ion binding;GO:0008948::oxaloacetate decarboxylase activity;GO:0015081::sodium ion transmembrane transporter activity;GO:0016020::membrane;GO:0016021::integral component of membran…
NC_037647.1	2748318	2748757	2748525;2748524;2748527	840	737	448	132	197	126	10.6387	9.56448	6.37131	1.85003	2.6829	2.20091	5.44631	4.89638	3.26169	0.947093	1.37347	1.12672	1.98054	0.0318454	1	+	+	+	-	-	-	Intron (XM_016914555.2/408306, intron 4 of 18)	2739996	2772044	32049	1	408306	#NAME?	8322	GO:0006812::cation transport;GO:0015299::solute:proton antiporter activity;GO:0016021::integral component of membrane;GO:0055085::transmembrane transport
NC_037648.1	13845107	13845518	13845322;13845336;13845293	312	605	611	233	211	175	3.95945	7.85376	8.68428	3.25494	2.8726	3.05008	2.16473	4.29385	4.74792	1.77956	1.57052	1.66756	1.15926	0.121434	1	+	+	+	-	-	-	Promoter (<=1kb)	13845074	13848285	3212	1	408310	#NAME?	33	GO:0070836::caveola assembly
NC_037648.1	13847300	13847601	13847447;13847434;13847438	378	431	479	253	279	144	4.79435	5.59872	6.8112	3.53314	3.794	2.51285	3.57593	4.17588	5.08023	2.63524	2.82981	1.87424	0.806038	0.0315144	1	+	+	+	-	-	-	Promoter (<=1kb)	13846698	13848285	1588	1	408310	#NAME?	602	GO:0070836::caveola assembly
NC_037648.1	13984638	13984950	13984810;13984813;13984842	889	540	546	417	351	280	11.2585	7.01136	7.76193	5.81438	4.7696	4.86973	8.1022	5.04573	5.58588	4.18433	3.43245	3.50451	0.752321	0.106669	1	+	+	+	-	-	-	Promoter (1-2kb)	13944921	13986151	41231	2	408311	#NAME?	1201	GO:0000276::mitochondrial proton-transporting ATP synthase complex, coupling factor F(o);GO:0004190::aspartic-type endopeptidase activity;GO:0004252::serine-type endopeptidase activity;GO:0005515::protein binding;GO:0005739::mitochondrion;GO:0005886::plasma membrane;GO:0006886::intracellular protein transport;GO:0015078::hydrogen ion transmembrane transporter activity;GO:0015986::ATP synthesis co…
NC_037648.1	15768933	15769231	15769092;15769091;15769094	437	532	462	445	402	299	5.5407	6.90768	6.56997	6.20386	5.46065	5.199	4.17407	5.20388	4.94947	4.67366	4.11377	3.91665	0.173487	0.237544	1	+	+	+	-	-	-	Promoter (1-2kb)	15763201	15767809	4609	2	408320	#NAME?	-1124	GO:0003735::structural constituent of ribosome;GO:0005622::intracellular;GO:0005840::ribosome;GO:0006412::translation;GO:0019843::rRNA binding
NC_037648.1	16280219	16280699	16280283;16280347;16280556;16280532	321	297	343	234	208	159	4.0733	3.86208	4.88136	3.26885	2.83195	2.7728	1.90751	1.8086	2.28593	1.53079	1.32619	1.29849	0.530438	0.0333504	1	+	+	+	-	-	-	Exon (XM_026443732.1/408332, exon 14 of 24)	16276028	16284500	8473	2	408332	#NAME?	3801	GO:0003677::DNA binding;GO:0003887::DNA-directed DNA polymerase activity;GO:0005246::calcium channel regulator activity;GO:0006260::DNA replication;GO:0006816::calcium ion transport;GO:0006950::response to stress;GO:0016020::membrane;GO:0019031::viral envelope;GO:0042030::ATPase inhibitor activity;GO:0046872::metal ion binding
NC_037648.1	2719844	2720263	2720058;2720060;2720093	489	416	410	212	188	204	6.1985	5.40432	5.83209	2.96283	2.56095	3.55265	3.32433	2.8984	3.12782	1.589	1.37347	1.90533	0.941782	0.00198241	1	+	+	+	-	-	-	5' UTR	2705707	2735133	29427	1	408342	#NAME?	14137	GO:0003824::catalytic activity;GO:0004129::cytochrome-c oxidase activity;GO:0005634::nucleus;GO:0006952::defense response;GO:0008134::transcription factor binding;GO:0008152::metabolic process
NC_037648.1	2942831	2943200	2942963;2942994;2942982	262	360	328	156	237	119	3.32695	4.67856	4.66851	2.18387	3.2249	2.0796	2.0254	2.84824	2.84212	1.32951	1.96327	1.26603	0.759151	0.0426212	1	+	+	+	-	-	-	Intron (XM_016914894.2/408343, intron 1 of 7)	2936166	3249803	313638	1	408343	#NAME?	6665	GO:0005216::ion channel activity;GO:0005249::voltage-gated potassium channel activity;GO:0006811::ion transport;GO:0006813::potassium ion transport;GO:0016020::membrane;GO:0016021::integral component of membrane;GO:0030955::potassium ion binding;GO:0042742::defense response to bacterium;GO:0051260::protein homooligomerization;GO:0055085::transmembrane transport
NC_037648.1	3122409	3122845	3122519;3122715;3122687;3122712	274	354	332	237	233	162	3.47875	4.6008	4.72527	3.31058	3.1707	2.82479	1.79312	2.37147	2.43563	1.70643	1.63433	1.45603	0.460443	0.0849418	1	+	+	+	-	-	-	Intron (XM_016914894.2/408343, intron 1 of 7)	3109079	3249803	140725	1	408343	#NAME?	13330	GO:0005216::ion channel activity;GO:0005249::voltage-gated potassium channel activity;GO:0006811::ion transport;GO:0006813::potassium ion transport;GO:0016020::membrane;GO:0016021::integral component of membrane;GO:0030955::potassium ion binding;GO:0042742::defense response to bacterium;GO:0051260::protein homooligomerization;GO:0055085::transmembrane transport
NC_037648.1	3107203	3107452	3107315;3107333;3107331	233	242	213	94	176	95	2.9601	3.14928	3.03666	1.32145	2.39835	1.66368	2.66706	2.83751	2.73604	1.19063	2.16092	1.49898	0.764608	0.0547663	1	+	+	+	-	-	-	Promoter (1-2kb)	3109079	3249803	140725	1	408343	#NAME?	-1627	GO:0005216::ion channel activity;GO:0005249::voltage-gated potassium channel activity;GO:0006811::ion transport;GO:0006813::potassium ion transport;GO:0016020::membrane;GO:0016021::integral component of membrane;GO:0030955::potassium ion binding;GO:0042742::defense response to bacterium;GO:0051260::protein homooligomerization;GO:0055085::transmembrane transport
NC_037648.1	3197944	3198322	3198146;3198119;3198156	282	288	257	168	210	167	3.57995	3.74544	3.66102	2.35079	2.85905	2.91144	2.12767	2.22603	2.17585	1.39714	1.69922	1.73035	0.435941	0.0267126	1	+	+	+	-	-	-	Intron (XM_016914894.2/408343, intron 1 of 7)	3211717	3244313	32597	1	408343	#NAME?	-13395	GO:0005216::ion channel activity;GO:0005249::voltage-gated potassium channel activity;GO:0006811::ion transport;GO:0006813::potassium ion transport;GO:0016020::membrane;GO:0016021::integral component of membrane;GO:0030955::potassium ion binding;GO:0042742::defense response to bacterium;GO:0051260::protein homooligomerization;GO:0055085::transmembrane transport
NC_037648.1	9835513	9835835	9835663;9835669;9835675	238	308	324	158	67	111	3.02335	4.00464	4.61175	2.21169	0.9214	1.94096	2.1084	2.79272	3.2161	1.54237	0.642558	1.35357	1.19785	0.0236697	1	+	+	+	-	-	-	Promoter (<=1kb)	9835051	9836587	1537	2	408346	#NAME?	752	GO:0005643::nuclear pore;GO:0005680::anaphase-promoting complex;GO:0005739::mitochondrion;GO:0016020::membrane;GO:0030001::metal ion transport;GO:0030071::regulation of mitotic metaphase/anaphase transition;GO:0031145::anaphase-promoting complex-dependent proteasomal ubiquitin-dependent protein catabolic process;GO:0046873::metal ion transmembrane transporter activity;GO:0055085::transmembrane tr…
NC_037648.1	10080346	10080677	10080487;10080504;10080520	488	390	389	268	241	119	6.18585	5.06736	5.5341	3.74179	3.2791	2.0796	4.19689	3.43803	3.7547	2.53868	2.22476	1.41094	0.883355	0.0170225	1	+	+	+	-	-	-	Intron (XR_003305651.1/408348, intron 6 of 8)	10072588	10137469	64882	1	408348	#NAME?	7758	GO:0005886::plasma membrane
NC_037648.1	12495341	12496575	12495515;12495916;12496454;12495516;12495895;12495917	4285	5458	4502	2298	1938	2017	54.2179	70.7486	63.8976	31.9791	26.2735	34.9719	9.88877	12.9038	11.6542	5.83265	4.79201	6.3785	1.01857	0.00943295	1	+	+	+	-	-	-	Exon (XM_026443842.1/408354, exon 6 of 6)	12498144	12499725	1582	2	408355	#NAME?	3150	GO:0016021::integral component of membrane;GO:0019058::viral life cycle
NC_037648.1	12688702	12688925	12688807;12688812;12688815	630	461	387	292	226	122	7.98215	5.98752	5.50572	4.07563	3.07585	2.13159	8.02672	6.02096	5.53647	4.09839	3.09303	2.14349	1.06898	0.0260838	1	+	+	+	-	-	-	Intron (XM_006566375.3/408358, intron 2 of 8)	12692837	12706589	13753	1	408358	#NAME?	-3912	GO:0003700::sequence-specific DNA binding transcription factor activity;GO:0005515::protein binding;GO:0006355::regulation of transcription, DNA-templated;GO:0006915::apoptotic process;GO:0042025::host cell nucleus;GO:0043565::sequence-specific DNA binding
NC_037648.1	12668609	12669124	12668857;12668837;12668851	1542	1484	1386	702	895	803	19.519	19.2456	19.6815	9.77873	12.1408	13.9333	8.52068	8.40133	8.59162	4.26874	5.29986	6.08234	0.70502	0.0235396	1	+	+	+	-	-	-	Promoter (1-2kb)	12667196	12706589	39394	1	408358	#NAME?	1413	GO:0003700::sequence-specific DNA binding transcription factor activity;GO:0005515::protein binding;GO:0006355::regulation of transcription, DNA-templated;GO:0006915::apoptotic process;GO:0042025::host cell nucleus;GO:0043565::sequence-specific DNA binding
NC_037648.1	12677226	12677466	12677337;12677346;12677351	693	453	450	233	213	178	8.7791	5.88384	6.39969	3.25494	2.8997	3.10207	8.20539	5.49934	5.98148	3.04223	2.71021	2.89935	1.18611	0.0460325	1	+	+	+	-	-	-	Intron (XM_006566375.3/408358, intron 2 of 8)	12671148	12706589	35442	1	408358	#NAME?	6078	GO:0003700::sequence-specific DNA binding transcription factor activity;GO:0005515::protein binding;GO:0006355::regulation of transcription, DNA-templated;GO:0006915::apoptotic process;GO:0042025::host cell nucleus;GO:0043565::sequence-specific DNA binding
NC_037648.1	12890935	12891260	12891075;12891088;12891071	383	511	528	278	241	208	4.8576	6.63552	7.50651	3.88089	3.2791	3.62197	3.35638	4.58484	5.18665	2.68152	2.26571	2.50261	0.817352	0.0659583	1	+	+	+	-	-	-	Promoter (2-3kb)	12888896	12905506	16611	1	408359	#NAME?	2039	GO:0005515::protein binding
NC_037648.1	12966439	12966794	12966621;12966607;12966622	397	494	515	247	205	151	5.0347	6.4152	7.32204	3.44968	2.7913	2.63416	3.18559	4.05907	4.63285	2.18271	1.76613	1.6667	1.08074	0.0266155	1	+	+	+	-	-	-	Exon (XM_006566247.3/408363, exon 5 of 9)	12958838	12973602	14765	1	408363	#NAME?	7601	GO:0004383::guanylate cyclase activity;GO:0006182::cGMP biosynthetic process;GO:0006480::N-terminal protein amino acid methylation;GO:0008168::methyltransferase activity;GO:0009190::cyclic nucleotide biosynthetic process;GO:0016849::phosphorus-oxygen lyase activity;GO:0035556::intracellular signal transduction
NC_037648.1	12968880	12969895	12969048;12969428;12969776;12969042;12969500;12969790;12969037;12969440	652	996	966	431	359	319	8.26045	12.9211	13.7217	6.00912	4.878	5.5456	1.83137	2.86465	3.04215	1.33224	1.08147	1.22948	1.08679	0.0638697	1	+	+	+	-	-	-	3' UTR	12958838	12973602	14765	1	408363	#NAME?	10042	GO:0004383::guanylate cyclase activity;GO:0006182::cGMP biosynthetic process;GO:0006480::N-terminal protein amino acid methylation;GO:0008168::methyltransferase activity;GO:0009190::cyclic nucleotide biosynthetic process;GO:0016849::phosphorus-oxygen lyase activity;GO:0035556::intracellular signal transduction
NC_037648.1	12952837	12953213	12952998;12953032;12953028	406	410	407	234	199	164	5.14855	5.32656	5.78952	3.26885	2.71	2.85945	3.07617	3.18253	3.45914	1.95308	1.61918	1.70847	0.879897	0.000674436	1	+	+	+	-	-	-	Exon (XM_026443783.1/107964020, exon 4 of 5)	12956997	12973602	16606	1	408363	#NAME?	-3784	GO:0004383::guanylate cyclase activity;GO:0006182::cGMP biosynthetic process;GO:0006480::N-terminal protein amino acid methylation;GO:0008168::methyltransferase activity;GO:0009190::cyclic nucleotide biosynthetic process;GO:0016849::phosphorus-oxygen lyase activity;GO:0035556::intracellular signal transduction
NC_037648.1	13005701	13006168	13005862;13005982;13005860;13006028;13005951	1371	1151	971	916	888	781	17.3558	14.9299	13.7927	12.7555	12.0459	13.5521	8.35344	7.18584	6.6385	6.13929	5.79776	6.5227	0.264732	0.119551	1	+	+	+	-	-	-	Exon (XM_391915.6/408365, exon 5 of 5)	13001238	13006851	5614	1	408365	#NAME?	4463	GO:0005515::protein binding;GO:0005576::extracellular region;GO:0005975::carbohydrate metabolic process;GO:0006030::chitin metabolic process;GO:0008061::chitin binding;GO:0016810::hydrolase activity, acting on carbon-nitrogen (but not peptide) bonds
NC_037648.1	13234159	13234466	13234327;13234340;13234350	289	334	342	263	174	143	3.6685	4.3416	4.86717	3.67224	2.37125	2.49552	2.6829	3.17516	3.55953	2.68563	1.73418	1.82506	0.592686	0.057308	1	+	+	+	-	-	-	Promoter (1-2kb)	13232343	13236031	3689	2	408368	#NAME?	1565	GO:0004013::adenosylhomocysteinase activity;GO:0006520::cellular amino acid metabolic process;GO:0006730::one-carbon metabolic process;GO:0006813::potassium ion transport;GO:0016491::oxidoreductase activity;GO:0051287::NAD binding;GO:0055114::oxidation-reduction process
NC_037649.1	1934575	1934875	1934744;1934746;1934750	246	327	245	179	153	107	3.12455	4.25088	3.49074	2.5038	2.0867	1.87164	2.33823	3.18111	2.61227	1.8737	1.56156	1.40063	0.74976	0.0282746	1	+	+	+	-	-	-	Intron (XM_026444321.1/408372, intron 4 of 9)	1928580	2020769	92190	1	408372	#NAME?	5995	GO:0003723::RNA binding
NC_037649.1	1879061	1879369	1879180;1879179;1879207	322	216	200	89	77	60	4.08595	2.81232	2.85219	1.2519	1.0569	1.05713	2.97852	2.05009	2.07915	0.912594	0.770445	0.770613	1.53447	0.033857	1	+	+	+	-	-	-	Intron (XM_026444321.1/408372, intron 3 of 9)	1902079	2020769	118691	1	408372	#NAME?	-22710	GO:0003723::RNA binding
NC_037649.1	1862714	1863375	1862959;1863086;1863188	561	368	306	299	192	129	7.1093	4.78224	4.35633	4.173	2.61515	2.2529	2.419	1.6272	1.48228	1.4199	0.889826	0.766568	0.845688	0.0901845	1	+	+	+	-	-	-	Intron (XM_026444321.1/408372, intron 3 of 9)	1902079	2020769	118691	1	408372	#NAME?	-38704	GO:0003723::RNA binding
NC_037649.1	1701113	1701385	1701233;1701239;1701248	260	243	242	162	154	112	3.30165	3.16224	3.44817	2.26733	2.10025	1.95829	2.72417	2.60915	2.84507	1.87076	1.73291	1.61577	0.647921	0.000619299	1	+	+	+	-	-	-	Distal Intergenic	1709289	2020769	311481	1	408372	#NAME?	-7904	GO:0003723::RNA binding
NC_037649.1	5246322	5246573	5246438;5246446;5246442	544	480	408	262	169	179	6.89425	6.23376	5.80371	3.65833	2.3035	3.1194	6.16244	5.57206	5.18766	3.27001	2.05899	2.78828	1.05985	0.00337892	1	+	+	+	-	-	-	Promoter (2-3kb)	5244246	5252596	8351	1	408373	#NAME?	2076	GO:0000166::nucleotide binding;GO:0005524::ATP binding;GO:0005737::cytoplasm;GO:0008033::tRNA processing;GO:0016773::phosphotransferase activity, alcohol group as acceptor;GO:0016879::ligase activity, forming carbon-nitrogen bonds
NC_037649.1	5413084	5413568	5413327;5413347;5413351	388	524	566	233	278	202	4.92085	6.804	8.04573	3.25494	3.78045	3.51799	2.28541	3.16001	3.73672	1.51171	1.75577	1.63388	0.90565	0.0736206	1	+	+	+	-	-	-	Intron (XM_006562228.3/408374, intron 2 of 11)	5273949	5549277	275329	1	408374	#NAME?	139135	GO:0003735::structural constituent of ribosome;GO:0005515::protein binding;GO:0005622::intracellular;GO:0005840::ribosome;GO:0006412::translation
NC_037649.1	5389800	5390082	5389926;5389944;5389950	358	364	400	136	172	152	4.54135	4.7304	5.69019	1.90567	2.34415	2.65149	3.61464	3.76511	4.52905	1.5168	1.8658	2.11043	1.11636	0.00559667	1	+	+	+	-	-	-	Intron (XM_006562228.3/408374, intron 1 of 11)	5273949	5549277	275329	1	408374	#NAME?	115851	GO:0003735::structural constituent of ribosome;GO:0005515::protein binding;GO:0005622::intracellular;GO:0005840::ribosome;GO:0006412::translation
NC_037649.1	5386819	5387263	5386932;5386985;5387032	591	584	577	257	247	220	7.4888	7.5816	8.20182	3.58878	3.3604	3.82993	3.79069	3.83767	4.15161	1.81657	1.70097	1.93864	1.11037	0.000314475	1	+	+	+	-	-	-	Intron (XM_006562228.3/408374, intron 1 of 11)	5273949	5549277	275329	1	408374	#NAME?	112870	GO:0003735::structural constituent of ribosome;GO:0005515::protein binding;GO:0005622::intracellular;GO:0005840::ribosome;GO:0006412::translation
NC_037649.1	5376192	5376522	5376385;5376391;5376390	333	293	315	193	198	113	4.2251	3.81024	4.48404	2.69854	2.69645	1.97562	2.87525	2.59293	3.05146	1.8364	1.83498	1.34444	0.764307	0.0058741	1	+	+	+	-	-	-	Intron (XM_006562228.3/408374, intron 1 of 11)	5273949	5549277	275329	1	408374	#NAME?	102243	GO:0003735::structural constituent of ribosome;GO:0005515::protein binding;GO:0005622::intracellular;GO:0005840::ribosome;GO:0006412::translation
NC_037649.1	5353627	5354152	5353935;5353952;5353962	442	583	661	272	269	239	5.60395	7.56864	9.39378	3.79743	3.6585	4.1592	2.3998	3.24115	4.02273	1.62619	1.56669	1.78111	0.958169	0.0767262	1	+	+	+	-	-	-	Intron (XM_006562228.3/408374, intron 1 of 11)	5273949	5549277	275329	1	408374	#NAME?	79678	GO:0003735::structural constituent of ribosome;GO:0005515::protein binding;GO:0005622::intracellular;GO:0005840::ribosome;GO:0006412::translation
NC_037649.1	5386023	5386261	5386133;5386147;5386152	510	352	350	187	204	124	6.46415	4.57488	4.98069	2.61508	2.77775	2.16625	6.09228	4.3117	4.69416	2.46464	2.61795	2.04163	1.08357	0.029702	1	+	+	+	-	-	-	Intron (XM_006562228.3/408374, intron 1 of 11)	5273949	5549277	275329	1	408374	#NAME?	112074	GO:0003735::structural constituent of ribosome;GO:0005515::protein binding;GO:0005622::intracellular;GO:0005840::ribosome;GO:0006412::translation
NC_037649.1	6969724	6970021	6969845;6969858;6969851	248	278	283	157	201	121	3.14985	3.61584	4.02996	2.19778	2.7371	2.11426	2.38089	2.73312	3.04615	1.66125	2.06891	1.59812	0.614931	0.0198775	1	+	+	+	-	-	-	Distal Intergenic	6987747	6989639	1893	2	408379	NM_001318482.1	19618	GO:0005509::calcium ion binding;GO:0005515::protein binding;GO:0006836::neurotransmitter transport;GO:0009405::pathogenesis;GO:0019835::cytolysis;GO:0019867::outer membrane;GO:0019905::syntaxin binding
NC_037649.1	8309127	8309456	8309280;8309286;8309299	374	343	309	393	189	125	4.74375	4.45824	4.3989	5.48054	2.5745	2.18358	3.23798	3.0431	3.00259	3.7409	1.7573	1.49046	0.40968	0.393923	1	+	+	+	-	-	-	Exon (XM_006565227.3/408381, exon 2 of 11)	8305441	8316952	11512	1	408381	#NAME?	3686	GO:0003677::DNA binding;GO:0005328::neurotransmitter:sodium symporter activity;GO:0005727::extrachromosomal circular DNA;GO:0006260::DNA replication;GO:0006836::neurotransmitter transport;GO:0016020::membrane;GO:0016021::integral component of membrane;GO:0051260::protein homooligomerization
NC_037649.1	8310897	8311337	8311046;8311029;8311178	245	380	320	239	197	91	3.1119	4.93776	4.55499	3.3384	2.6829	1.59436	1.58947	2.52207	2.32657	1.70516	1.37035	0.814356	0.726915	0.0924553	1	+	+	+	-	-	-	Exon (XM_006565227.3/408381, exon 6 of 11)	8305441	8316952	11512	1	408381	#NAME?	5456	GO:0003677::DNA binding;GO:0005328::neurotransmitter:sodium symporter activity;GO:0005727::extrachromosomal circular DNA;GO:0006260::DNA replication;GO:0006836::neurotransmitter transport;GO:0016020::membrane;GO:0016021::integral component of membrane;GO:0051260::protein homooligomerization
NC_037649.1	8305305	8305589	8305430;8305437;8305462	379	433	407	341	274	146	4.807	5.62464	5.78952	4.75722	3.72625	2.54751	3.79923	4.44546	4.57577	3.75989	2.94506	2.01343	0.556316	0.096036	1	+	+	+	-	-	-	Promoter (<=1kb)	8305441	8316952	11512	1	408381	#NAME?	0	GO:0003677::DNA binding;GO:0005328::neurotransmitter:sodium symporter activity;GO:0005727::extrachromosomal circular DNA;GO:0006260::DNA replication;GO:0006836::neurotransmitter transport;GO:0016020::membrane;GO:0016021::integral component of membrane;GO:0051260::protein homooligomerization
NC_037649.1	11105325	11105745	11105544;11105600;11105496	229	349	331	169	190	136	2.9095	4.536	4.71108	2.3647	2.58805	2.37421	1.55669	2.42693	2.52061	1.2652	1.3847	1.27029	0.730451	0.104682	1	+	+	+	-	-	-	Distal Intergenic	11127257	11130777	3521	1	408383	NM_001205062.1	-21512	GO:0005506::iron ion binding;GO:0016705::oxidoreductase activity, acting on paired donors, with incorporation or reduction of molecular oxygen;GO:0020037::heme binding;GO:0055114::oxidation-reduction process
NC_037649.1	11238467	11238791	11238643;11238638;11238657	401	412	403	347	205	137	5.0853	5.35248	5.73276	4.84068	2.7913	2.39154	3.52452	3.70969	3.97326	3.35498	1.93459	1.65753	0.689979	0.106523	1	+	+	+	-	-	-	Promoter (<=1kb)	11235950	11239041	3092	2	408384	#NAME?	250	GO:0005515::protein binding;GO:0008270::zinc ion binding
NC_037649.1	11217266	11217681	11217415;11217476;11217473	717	619	639	285	274	258	9.0827	8.0352	9.0816	3.97826	3.72625	4.48847	4.918	4.35081	4.9174	2.1541	2.01765	2.43036	1.10349	0.000814436	1	+	+	+	-	-	-	Distal Intergenic	11235950	11239041	3092	2	408384	#NAME?	21360	GO:0005515::protein binding;GO:0008270::zinc ion binding
NC_037649.1	11387045	11387386	11387185;11387182;11387195	469	454	495	323	198	167	5.9455	5.8968	7.03824	4.50684	2.69645	2.91144	3.91587	3.8838	4.63558	2.96833	1.77596	1.91756	0.900442	0.0176085	1	+	+	+	-	-	-	Promoter (1-2kb)	11386011	11387659	1649	1	408386	#NAME?	1034	GO:0003676::nucleic acid binding;GO:0003700::sequence-specific DNA binding transcription factor activity;GO:0005634::nucleus;GO:0006355::regulation of transcription, DNA-templated
NC_037649.1	11396641	11397056	11396919;11396864;11396814	353	540	599	276	292	201	4.4781	7.01136	8.514	3.85307	3.97015	3.50066	2.42475	3.79643	4.61006	2.08632	2.14971	1.8955	0.820881	0.131395	1	+	+	+	-	-	-	Distal Intergenic	11386011	11387659	1649	1	408386	#NAME?	10630	GO:0003676::nucleic acid binding;GO:0003700::sequence-specific DNA binding transcription factor activity;GO:0005634::nucleus;GO:0006355::regulation of transcription, DNA-templated
NC_037649.1	8785212	8785529	8785387;8785408;8785402	266	292	373	231	234	170	3.37755	3.79728	5.30706	3.22712	3.18425	2.96343	2.39244	2.68975	3.75918	2.28589	2.25552	2.0991	0.412977	0.217366	1	+	+	+	-	-	-	Intron (XM_006566980.3/408390, intron 4 of 9)	8738802	8832096	93295	1	408390	#NAME?	46410	GO:0005515::protein binding;GO:0016021::integral component of membrane
NC_037649.1	10153502	10154050	10153623;10153687;10153939;10153660	328	360	360	237	322	225	4.16185	4.67856	5.12259	3.31058	4.37665	3.91658	1.70758	1.91958	2.10176	1.35831	1.79571	1.60695	0.26701	0.131918	1	+	+	+	-	-	-	Intron (XM_006566907.3/408393, intron 1 of 27)	10138914	10474973	336060	1	408393	#NAME?	14588	GO:0005515::protein binding;GO:0005576::extracellular region;GO:0005739::mitochondrion;GO:0009405::pathogenesis;GO:0019031::viral envelope;GO:0019870::potassium channel inhibitor activity
NC_037649.1	10727406	10727849	10727521;10727726;10727550;10727740	317	593	626	170	162	164	4.0227	7.69824	8.89713	2.37861	2.20865	2.85945	2.0408	3.90549	4.51371	1.20672	1.1205	1.45066	1.46923	0.093304	1	+	+	+	-	-	-	Exon (XM_391942.7/408394, exon 14 of 17)	10721326	10729334	8009	1	408394	#NAME?	6080	GO:0005201::extracellular matrix structural constituent;GO:0005578::proteinaceous extracellular matrix;GO:0005581::collagen trimer;GO:0007275::multicellular organismal development
NC_037649.1	10726659	10727153	10726876;10726851;10726883	363	614	675	237	204	160	4.6046	7.9704	9.59244	3.31058	2.77775	2.79013	2.09533	3.62695	4.36506	1.50649	1.26402	1.26966	1.32006	0.0925807	1	+	+	+	-	-	-	Exon (XM_391942.7/408394, exon 13 of 17)	10721326	10729334	8009	1	408394	#NAME?	5333	GO:0005201::extracellular matrix structural constituent;GO:0005578::proteinaceous extracellular matrix;GO:0005581::collagen trimer;GO:0007275::multicellular organismal development
NC_037650.1	3777134	3777467	3777312;3777308;3777331	444	550	514	404	395	266	5.62925	7.14096	7.30785	5.63355	5.3658	4.62711	3.79639	4.81589	4.92844	3.79929	3.61872	3.12054	0.361629	0.0898694	1	+	+	+	-	-	-	Promoter (2-3kb)	3775097	3795441	20345	1	408406	#NAME?	2037	GO:0004672::protein kinase activity;GO:0005524::ATP binding;GO:0006468::protein phosphorylation;GO:0016020::membrane;GO:0016773::phosphotransferase activity, alcohol group as acceptor
NC_037650.1	4181646	4181938	4181755;4181786;4181799	226	287	246	115	129	47	2.87155	3.73248	3.50493	1.61356	1.7615	0.83184	2.20757	2.86943	2.6945	1.24046	1.3542	0.639497	1.26481	0.00728277	1	+	+	+	-	-	-	Distal Intergenic	4189927	4271242	81316	1	408411	#NAME?	-7989	GO:0000287::magnesium ion binding;GO:0005524::ATP binding;GO:0005672::transcription factor TFIIA complex;GO:0006355::regulation of transcription, DNA-templated;GO:0006367::transcription initiation from RNA polymerase II promoter;GO:0008900::hydrogen:potassium-exchanging ATPase activity;GO:0015991::ATP hydrolysis coupled proton transport;GO:0016020::membrane;GO:0019042::viral latency;GO:0033644::h…
NC_037650.1	4209606	4209979	4209711;4209787;4209794	259	405	413	207	204	144	3.289	5.26176	5.87466	2.89328	2.77775	2.51285	1.98088	3.16903	3.53816	1.74255	1.67297	1.51343	0.817756	0.113654	1	+	+	+	-	-	-	Intron (XM_026444697.1/408411, intron 1 of 2)	4189929	4196492	6564	1	408411	#NAME?	19677	GO:0000287::magnesium ion binding;GO:0005524::ATP binding;GO:0005672::transcription factor TFIIA complex;GO:0006355::regulation of transcription, DNA-templated;GO:0006367::transcription initiation from RNA polymerase II promoter;GO:0008900::hydrogen:potassium-exchanging ATPase activity;GO:0015991::ATP hydrolysis coupled proton transport;GO:0016020::membrane;GO:0019042::viral latency;GO:0033644::h…
NC_037650.1	4295707	4296567	4295981;4296072;4296107;4296469	491	581	555	478	407	163	6.2238	7.54272	7.88964	6.66289	5.5284	2.84212	1.62824	1.97329	2.06405	1.74311	1.44631	0.743542	0.526605	0.180915	1	+	+	+	-	-	-	Distal Intergenic	4307133	4308572	1440	2	408412	#NAME?	12005	.
NC_037650.1	4497085	4497373	4497246;4497239;4497265	253	295	212	178	134	114	3.2131	3.83616	3.02247	2.48989	1.82925	1.99295	2.50434	2.98996	2.35576	1.94066	1.42574	1.55333	0.674122	0.0180291	1	+	+	+	-	-	-	Promoter (1-2kb)	4498926	4504785	5860	1	408414	#NAME?	-1553	GO:0000145::exocyst;GO:0000921::septin ring assembly;GO:0003924::GTPase activity;GO:0004871::signal transducer activity;GO:0005102::receptor binding;GO:0005515::protein binding;GO:0005577::fibrinogen complex;GO:0005737::cytoplasm;GO:0005741::mitochondrial outer membrane;GO:0005940::septin ring;GO:0006606::protein import into nucleus;GO:0006891::intra-Golgi vesicle-mediated transport;GO:0006904::v…
NC_037650.1	5316222	5316747	5316430;5316414;5316726;5316442	315	504	610	201	253	151	3.9974	6.5448	8.67009	2.80982	3.4417	2.63416	1.71182	2.8027	3.71282	1.20326	1.47385	1.12804	1.11248	0.121313	1	+	+	+	-	-	-	Promoter (<=1kb)	5297613	5317221	19609	2	408423	NM_001104949.1	474	GO:0003700::sequence-specific DNA binding transcription factor activity;GO:0004252::serine-type endopeptidase activity;GO:0005886::plasma membrane;GO:0006355::regulation of transcription, DNA-templated;GO:0043565::sequence-specific DNA binding
NC_037650.1	5333489	5333916	5333650;5333751;5333624	230	440	450	136	233	191	2.92215	5.71536	6.39969	1.90567	3.1707	3.32736	1.53789	3.00792	3.36807	1.00293	1.6687	1.75115	0.839434	0.161807	1	+	+	+	-	-	-	Intron (XM_016915675.2/408423, intron 1 of 14)	5292251	5338649	46399	2	408423	#NAME?	4733	GO:0003700::sequence-specific DNA binding transcription factor activity;GO:0004252::serine-type endopeptidase activity;GO:0005886::plasma membrane;GO:0006355::regulation of transcription, DNA-templated;GO:0043565::sequence-specific DNA binding
NC_037650.1	5408974	5409465	5409279;5409202;5409179	544	731	663	307	432	281	6.89425	9.48672	9.42216	4.28428	5.86715	4.88706	3.15637	4.34328	4.31372	1.96146	2.68614	2.23743	0.778886	0.0328937	1	+	+	+	-	-	-	Intron (XM_006560289.3/408423, intron 2 of 17)	5292251	5398386	106136	2	408423	#NAME?	-10588	GO:0003700::sequence-specific DNA binding transcription factor activity;GO:0004252::serine-type endopeptidase activity;GO:0005886::plasma membrane;GO:0006355::regulation of transcription, DNA-templated;GO:0043565::sequence-specific DNA binding
NC_037650.1	5346984	5347583	5347157;5347390;5347327;5347254;5347429	354	614	767	212	233	201	4.49075	7.9704	10.8979	2.96283	3.1707	3.50066	1.68591	2.99223	4.09127	1.1123	1.19034	1.31421	1.27775	0.13115	1	+	+	+	-	-	-	Intron (XM_026444555.1/408423, intron 1 of 14)	5292251	5355108	62858	2	408423	#NAME?	7525	GO:0003700::sequence-specific DNA binding transcription factor activity;GO:0004252::serine-type endopeptidase activity;GO:0005886::plasma membrane;GO:0006355::regulation of transcription, DNA-templated;GO:0043565::sequence-specific DNA binding
NC_037650.1	5659300	5659705	5659501;5659493;5659405	377	415	480	297	221	229	4.7817	5.39136	6.82539	4.14518	3.0081	3.9859	2.65291	2.99115	3.78676	2.29977	1.66891	2.2114	0.60976	0.0633644	1	+	+	+	-	-	-	Distal Intergenic	5654080	5656491	2412	1	408424	#NAME?	5220	GO:0005515::protein binding
NC_037650.1	5944350	5944757	5944501;5944548;5944590	284	400	427	226	219	198	3.60525	5.19696	6.07332	3.15757	2.981	3.44867	1.99041	2.86917	3.35299	1.74325	1.64577	1.90396	0.633754	0.130288	1	+	+	+	-	-	-	Distal Intergenic	5953969	5955496	1528	1	408426	#NAME?	-9212	GO:0006505::GPI anchor metabolic process;GO:0006886::intracellular protein transport;GO:0016787::hydrolase activity;GO:0016788::hydrolase activity, acting on ester bonds;GO:0098599::palmitoyl hydrolase activity
NC_037650.1	6167506	6167902	6167769;6167764;6167752	427	575	554	421	351	249	5.4142	7.46496	7.87545	5.87002	4.7696	4.3325	3.07192	4.23549	4.46839	3.33055	2.70619	2.45819	0.471153	0.11079	1	+	+	+	-	-	-	Distal Intergenic	6004509	6151702	147194	2	408429	#NAME?	-15804	GO:0003677::DNA binding;GO:0003917::DNA topoisomerase type I activity;GO:0004252::serine-type endopeptidase activity;GO:0005515::protein binding;GO:0005694::chromosome;GO:0005886::plasma membrane;GO:0006265::DNA topological change;GO:0008948::oxaloacetate decarboxylase activity;GO:0015081::sodium ion transmembrane transporter activity;GO:0016020::membrane;GO:0071436::sodium ion export
NC_037650.1	6155965	6156301	6156112;6156157;6156132	259	318	315	197	154	145	3.289	4.13424	4.48404	2.75418	2.10025	2.53018	2.19837	2.76333	2.99713	1.84089	1.40381	1.69117	0.68925	0.0319484	1	+	+	+	-	-	-	Distal Intergenic	6004509	6151702	147194	2	408429	#NAME?	-4263	GO:0003677::DNA binding;GO:0003917::DNA topoisomerase type I activity;GO:0004252::serine-type endopeptidase activity;GO:0005515::protein binding;GO:0005694::chromosome;GO:0005886::plasma membrane;GO:0006265::DNA topological change;GO:0008948::oxaloacetate decarboxylase activity;GO:0015081::sodium ion transmembrane transporter activity;GO:0016020::membrane;GO:0071436::sodium ion export
NC_037650.1	6046355	6046900	6046720;6046725;6046703	922	1428	1316	607	555	476	11.676	18.5198	18.6882	8.45728	7.5338	8.26641	4.8169	7.6403	7.70977	3.48903	3.10805	3.41029	1.01093	0.068811	1	+	+	+	-	-	-	Promoter (<=1kb)	6004509	6045653	41145	2	408429	#NAME?	-702	GO:0003677::DNA binding;GO:0003917::DNA topoisomerase type I activity;GO:0004252::serine-type endopeptidase activity;GO:0005515::protein binding;GO:0005694::chromosome;GO:0005886::plasma membrane;GO:0006265::DNA topological change;GO:0008948::oxaloacetate decarboxylase activity;GO:0015081::sodium ion transmembrane transporter activity;GO:0016020::membrane;GO:0071436::sodium ion export
NC_037650.1	6039023	6039285	6039150;6039172;6039157	330	512	486	253	280	140	4.18715	6.64848	6.91053	3.53314	3.80755	2.44353	3.58616	5.69421	5.91864	3.02602	3.26104	2.0928	0.858978	0.073675	1	+	+	+	-	-	-	Promoter (<=1kb)	6004509	6040126	35618	2	408429	#NAME?	841	GO:0003677::DNA binding;GO:0003917::DNA topoisomerase type I activity;GO:0004252::serine-type endopeptidase activity;GO:0005515::protein binding;GO:0005694::chromosome;GO:0005886::plasma membrane;GO:0006265::DNA topological change;GO:0008948::oxaloacetate decarboxylase activity;GO:0015081::sodium ion transmembrane transporter activity;GO:0016020::membrane;GO:0071436::sodium ion export
NC_037650.1	6040022	6040472	6040161;6040174;6040430;6040155	551	774	799	383	367	336	6.9828	10.044	11.352	5.34144	4.9864	5.84021	3.48754	5.01645	5.66973	2.66777	2.49045	2.91688	0.811668	0.0831184	1	+	+	+	-	-	-	Promoter (<=1kb)	6004509	6040126	35618	2	408429	#NAME?	0	GO:0003677::DNA binding;GO:0003917::DNA topoisomerase type I activity;GO:0004252::serine-type endopeptidase activity;GO:0005515::protein binding;GO:0005694::chromosome;GO:0005886::plasma membrane;GO:0006265::DNA topological change;GO:0008948::oxaloacetate decarboxylase activity;GO:0015081::sodium ion transmembrane transporter activity;GO:0016020::membrane;GO:0071436::sodium ion export
NC_037650.1	6147608	6147899	6147750;6147761;6147762	274	314	284	224	161	216	3.47875	4.0824	4.04415	3.12975	2.1951	3.76061	2.68353	3.14919	3.11969	2.41431	1.69332	2.90096	0.353152	0.197775	1	+	+	+	-	-	-	Intron (XM_006560372.3/408429, intron 1 of 20)	6004509	6151693	147185	2	408429	#NAME?	3794	GO:0003677::DNA binding;GO:0003917::DNA topoisomerase type I activity;GO:0004252::serine-type endopeptidase activity;GO:0005515::protein binding;GO:0005694::chromosome;GO:0005886::plasma membrane;GO:0006265::DNA topological change;GO:0008948::oxaloacetate decarboxylase activity;GO:0015081::sodium ion transmembrane transporter activity;GO:0016020::membrane;GO:0071436::sodium ion export
NC_037650.1	6187731	6188321	6187908;6187892;6187922	549	693	757	417	417	263	6.9575	8.99424	10.756	5.81438	5.6639	4.57512	2.65175	3.42802	4.09949	2.21606	2.15871	1.74374	0.734379	0.0702486	1	+	+	+	-	-	-	Exon (XM_016915754.2/726547, exon 8 of 8)	6004509	6151702	147194	2	408429	#NAME?	-36029	GO:0003677::DNA binding;GO:0003917::DNA topoisomerase type I activity;GO:0004252::serine-type endopeptidase activity;GO:0005515::protein binding;GO:0005694::chromosome;GO:0005886::plasma membrane;GO:0006265::DNA topological change;GO:0008948::oxaloacetate decarboxylase activity;GO:0015081::sodium ion transmembrane transporter activity;GO:0016020::membrane;GO:0071436::sodium ion export
NC_037650.1	6264412	6264843	6264567;6264583;6264603	348	402	282	242	289	103	4.41485	5.22288	4.01577	3.38013	3.9295	1.80232	2.30196	2.72328	2.09388	1.76245	2.0489	0.939755	0.583439	0.125848	1	+	+	+	-	-	-	Intron (XM_026444580.1/408430, intron 2 of 13)	6246147	6325630	79484	1	408430	#NAME?	18265	GO:0005173::stem cell factor receptor binding;GO:0005245::voltage-gated calcium channel activity;GO:0005515::protein binding;GO:0005891::voltage-gated calcium channel complex;GO:0007155::cell adhesion;GO:0016020::membrane;GO:0016021::integral component of membrane;GO:0070588::calcium ion transmembrane transport
NC_037650.1	6239939	6240214	6240074;6240087;6240090	942	854	724	583	596	495	11.929	11.0808	10.2877	8.12344	8.08935	8.59568	9.73557	9.04333	8.39606	6.62975	6.60193	7.01516	0.424581	0.0182118	1	+	+	+	-	-	-	Promoter (1-2kb)	6241811	6325630	83820	1	408430	#NAME?	-1597	GO:0005173::stem cell factor receptor binding;GO:0005245::voltage-gated calcium channel activity;GO:0005515::protein binding;GO:0005891::voltage-gated calcium channel complex;GO:0007155::cell adhesion;GO:0016020::membrane;GO:0016021::integral component of membrane;GO:0070588::calcium ion transmembrane transport
NC_037650.1	6196683	6196915	6196836;6196765;6196836	183	217	236	199	195	96	2.3276	2.82528	3.36303	2.782	2.6558	1.68101	2.25019	2.73132	3.25118	2.68948	2.56747	1.6251	0.258525	0.368603	1	+	+	+	-	-	-	Intron (XM_006560354.3/726547, intron 7 of 7)	6241811	6325630	83820	1	408430	#NAME?	-44896	GO:0005173::stem cell factor receptor binding;GO:0005245::voltage-gated calcium channel activity;GO:0005515::protein binding;GO:0005891::voltage-gated calcium channel complex;GO:0007155::cell adhesion;GO:0016020::membrane;GO:0016021::integral component of membrane;GO:0070588::calcium ion transmembrane transport
NC_037650.1	6893340	6893595	6893482;6893467;6893471	215	319	259	182	231	92	2.7324	4.1472	3.6894	2.54553	3.1436	1.61169	2.4042	3.64906	3.24625	2.23978	2.76601	1.4181	0.533708	0.149116	1	+	+	+	-	-	-	Distal Intergenic	6858151	6861688	3538	2	408434	#NAME?	-31652	GO:0016757::transferase activity, transferring glycosyl groups
NC_037651.1	4557576	4558302	4557842;4558101;4557733;4558093;4558101	382	672	703	262	304	238	4.84495	8.72208	9.98976	3.65833	4.13275	4.14187	1.50114	2.70242	3.09519	1.13348	1.28048	1.2833	0.981192	0.12783	1	+	+	+	-	-	-	Exon (XM_006560181.3/408444, exon 19 of 34)	4542096	4599343	57248	1	408444	#NAME?	15480	GO:0003774::motor activity;GO:0005515::protein binding;GO:0005524::ATP binding;GO:0005856::cytoskeleton;GO:0016459::myosin complex
NC_037651.1	4558869	4559304	4558986;4559154;4559185;4559128	262	316	360	136	160	118	3.32695	4.10832	5.12259	1.90567	2.18155	2.06227	1.7188	2.12248	2.64649	0.984527	1.12706	1.06543	1.03005	0.0514315	1	+	+	+	-	-	-	Exon (XM_006560181.3/408444, exon 20 of 34)	4542096	4599343	57248	1	408444	#NAME?	16773	GO:0003774::motor activity;GO:0005515::protein binding;GO:0005524::ATP binding;GO:0005856::cytoskeleton;GO:0016459::myosin complex
NC_037651.1	4694667	4695310	4694988;4694995;4694971	1705	2202	2315	1137	913	1050	21.5809	28.5509	32.864	15.8296	12.3847	18.2138	7.54832	9.9862	11.4948	5.53669	4.33178	6.37061	0.83804	0.0460513	1	+	+	+	-	-	-	Promoter (1-2kb)	4693082	4699494	6413	1	408446	#NAME?	1585	GO:0008152::metabolic process;GO:0045893::positive regulation of transcription, DNA-templated
NC_037651.1	5267790	5268293	5268067;5268012;5268000	276	440	614	130	180	165	3.50405	5.71536	8.72685	1.82221	2.45255	2.87678	1.56605	2.55435	3.90026	0.814394	1.09611	1.28571	1.32736	0.135554	1	+	+	+	-	-	-	Promoter (<=1kb)	5267692	5333920	66229	1	408449	#NAME?	98	GO:0000808::origin recognition complex;GO:0003677::DNA binding;GO:0003700::sequence-specific DNA binding transcription factor activity;GO:0004252::serine-type endopeptidase activity;GO:0004930::G-protein coupled receptor activity;GO:0005216::ion channel activity;GO:0005515::protein binding;GO:0005576::extracellular region;GO:0005634::nucleus;GO:0005886::plasma membrane;GO:0006260::DNA replication…
NC_037651.1	5783050	5783362	5783186;5783183;5783207	212	259	231	122	153	65	2.69445	3.3696	3.29208	1.71093	2.0867	1.14378	1.93906	2.42494	2.36915	1.23127	1.5017	0.823123	0.920989	0.0150443	1	+	+	+	-	-	-	Distal Intergenic	5789174	5791327	2154	1	408452	#NAME?	-5812	GO:0005249::voltage-gated potassium channel activity;GO:0005506::iron ion binding;GO:0006811::ion transport;GO:0008948::oxaloacetate decarboxylase activity;GO:0015081::sodium ion transmembrane transporter activity;GO:0016020::membrane;GO:0016705::oxidoreductase activity, acting on paired donors, with incorporation or reduction of molecular oxygen;GO:0020037::heme binding;GO:0055114::oxidation-red…
NC_037651.1	5787522	5787831	5787665;5787674;5787658	247	327	279	216	222	158	3.1372	4.25088	3.9732	3.01847	3.02165	2.75547	2.27954	3.08876	2.88699	2.19327	2.19558	2.00217	0.369273	0.11689	1	+	+	+	-	-	-	Promoter (1-2kb)	5789174	5791327	2154	1	408452	#NAME?	-1343	GO:0005249::voltage-gated potassium channel activity;GO:0005506::iron ion binding;GO:0006811::ion transport;GO:0008948::oxaloacetate decarboxylase activity;GO:0015081::sodium ion transmembrane transporter activity;GO:0016020::membrane;GO:0016705::oxidoreductase activity, acting on paired donors, with incorporation or reduction of molecular oxygen;GO:0020037::heme binding;GO:0055114::oxidation-red…
NC_037651.1	7016950	7017387	7017105;7017044;7017286;7017087	323	324	250	308	250	116	4.0986	4.212	3.56169	4.29819	3.40105	2.02761	2.10779	2.16611	1.83168	2.21044	1.74906	1.04274	0.287554	0.394167	1	+	+	+	-	-	-	Intron (XM_016916252.2/408455, intron 1 of 5)	7034314	7173933	139620	1	408455	#NAME?	-16927	GO:0005634::nucleus;GO:0046872::metal ion binding
NC_037651.1	6942419	6942953	6942644;6942674;6942631	288	438	578	175	219	138	3.65585	5.68944	8.21601	2.44816	2.981	2.40887	1.53922	2.39542	3.45918	1.03075	1.25509	1.01421	1.16384	0.13068	1	+	+	+	-	-	-	Intron (XM_393474.7/409985, intron 16 of 17)	6978746	7173933	195188	1	408455	#NAME?	-35793	GO:0005634::nucleus;GO:0046872::metal ion binding
NC_037651.1	6972373	6972883	6972549;6972871;6972538;6972538	327	512	546	214	238	150	4.1492	6.64848	7.76193	2.99065	3.23845	2.61683	1.82898	2.93068	3.42149	1.31829	1.42752	1.15351	1.06908	0.0898531	1	+	+	+	-	-	-	Distal Intergenic	6978746	7173933	195188	1	408455	#NAME?	-5863	GO:0005634::nucleus;GO:0046872::metal ion binding
NC_037651.1	7021411	7021862	7021620;7021670;7021635	298	451	490	204	210	97	3.78235	5.85792	6.96729	2.85155	2.85905	1.69834	1.88491	2.91925	3.4721	1.42105	1.42479	0.846355	1.1645	0.0653112	1	+	+	+	-	-	-	Intron (XM_016916252.2/408455, intron 1 of 5)	7034314	7173933	139620	1	408455	#NAME?	-12452	GO:0005634::nucleus;GO:0046872::metal ion binding
NC_037651.1	8025724	8026203	8025865;8025868;8026105;8025926	367	393	429	264	253	189	4.6552	5.10624	6.1017	3.68615	3.4417	3.2927	2.18456	2.39622	2.86336	1.72981	1.6151	1.54517	0.606247	0.0433217	1	+	+	+	-	-	-	Promoter (1-2kb)	8024085	8044616	20532	1	408462	#NAME?	1639	GO:0003700::sequence-specific DNA binding transcription factor activity;GO:0005216::ion channel activity;GO:0005242::inward rectifier potassium channel activity;GO:0006355::regulation of transcription, DNA-templated;GO:0006811::ion transport;GO:0006813::potassium ion transport;GO:0016020::membrane;GO:0016021::integral component of membrane;GO:0055085::transmembrane transport
NC_037651.1	8315101	8316039	8315247;8315557;8315895;8315249;8315636;8315945;8315251	1454	1360	1223	1348	1040	860	18.4058	17.6386	17.3686	18.7646	14.1055	14.9211	4.41525	4.23121	4.16645	4.50132	3.38368	3.57933	0.160446	0.320975	1	+	+	+	-	-	-	Promoter (<=1kb)	8314909	8327434	12526	1	408467	#NAME?	192	GO:0005247::voltage-gated chloride channel activity;GO:0006821::chloride transport;GO:0015031::protein transport;GO:0016020::membrane;GO:0016032::viral process;GO:0030176::integral component of endoplasmic reticulum membrane;GO:0055085::transmembrane transport
NC_037651.1	8324006	8324371	8324170;8324235;8324249	593	489	492	476	245	196	7.5141	6.3504	6.99567	6.63507	3.3333	3.41401	4.62447	3.90829	4.30541	4.08348	2.05144	2.10112	0.640416	0.139358	1	+	+	+	-	-	-	Promoter (2-3kb)	8321427	8327434	6008	1	408467	#NAME?	2579	GO:0005247::voltage-gated chloride channel activity;GO:0006821::chloride transport;GO:0015031::protein transport;GO:0016020::membrane;GO:0016032::viral process;GO:0030176::integral component of endoplasmic reticulum membrane;GO:0055085::transmembrane transport
NC_037651.1	8703959	8704580	8704348;8704308;8704329	712	967	1138	483	403	412	9.01945	12.5453	16.1624	6.73244	5.4742	7.15729	3.2663	4.54315	5.85305	2.43808	1.98243	2.59194	0.962231	0.0896467	1	+	+	+	-	-	-	3' UTR	8711959	8731942	19984	1	408470	#NAME?	-7379	GO:0003700::sequence-specific DNA binding transcription factor activity;GO:0003951::NAD+ kinase activity;GO:0004871::signal transducer activity;GO:0006355::regulation of transcription, DNA-templated;GO:0006741::NADP biosynthetic process;GO:0007165::signal transduction;GO:0008152::metabolic process;GO:0016301::kinase activity
NC_037651.1	8701872	8702124	8701982;8702004;8702007	463	497	502	355	364	243	5.8696	6.45408	7.13757	4.95196	4.94575	4.22852	5.22582	5.74619	6.35472	4.40883	4.4033	3.76473	0.462228	0.0205861	1	+	+	+	-	-	-	Exon (XM_006564895.3/100578813, exon 2 of 3)	8711959	8731942	19984	1	408470	#NAME?	-9835	GO:0003700::sequence-specific DNA binding transcription factor activity;GO:0003951::NAD+ kinase activity;GO:0004871::signal transducer activity;GO:0006355::regulation of transcription, DNA-templated;GO:0006741::NADP biosynthetic process;GO:0007165::signal transduction;GO:0008152::metabolic process;GO:0016301::kinase activity
NC_037651.1	8704690	8705434	8704798;8705170;8705221;8705185	949	1148	1211	611	539	479	12.0175	14.891	17.1983	8.51292	7.317	8.3184	3.63349	4.5023	5.19991	2.57388	2.2123	2.51507	0.869078	0.0404576	1	+	+	+	-	-	-	Distal Intergenic	8711959	8731942	19984	1	408470	#NAME?	-6525	GO:0003700::sequence-specific DNA binding transcription factor activity;GO:0003951::NAD+ kinase activity;GO:0004871::signal transducer activity;GO:0006355::regulation of transcription, DNA-templated;GO:0006741::NADP biosynthetic process;GO:0007165::signal transduction;GO:0008152::metabolic process;GO:0016301::kinase activity
NC_037651.1	8717433	8717737	8717536;8717557;8717553	731	562	533	375	484	229	9.2598	7.29648	7.57746	5.23016	6.57175	3.9859	6.83862	5.38865	5.59616	3.86262	4.85342	2.9437	0.61224	0.0470696	1	+	+	+	-	-	-	Promoter (<=1kb)	8718526	8731942	13417	1	408470	#NAME?	-789	GO:0003700::sequence-specific DNA binding transcription factor activity;GO:0003951::NAD+ kinase activity;GO:0004871::signal transducer activity;GO:0006355::regulation of transcription, DNA-templated;GO:0006741::NADP biosynthetic process;GO:0007165::signal transduction;GO:0008152::metabolic process;GO:0016301::kinase activity
NC_037651.1	9291003	9291295	9291179;9291182;9291242	720	440	382	379	348	245	9.12065	5.71536	5.43477	5.2858	4.72895	4.26318	7.01172	4.39382	4.17811	4.06359	3.6355	3.27742	0.505615	0.229655	1	+	+	+	-	-	-	Promoter (<=1kb)	9291450	9302973	11524	1	408478	#NAME?	-155	GO:0005215::transporter activity;GO:0005739::mitochondrion;GO:0005747::mitochondrial respiratory chain complex I;GO:0006810::transport;GO:0016020::membrane;GO:0016021::integral component of membrane;GO:0022857::transmembrane transporter activity;GO:0055085::transmembrane transport
NC_037651.1	9416598	9416844	9416723;9416714;9416718	556	690	594	405	388	326	7.04605	8.95536	8.44305	5.64746	5.27095	5.66691	6.42562	8.16681	7.69961	5.15018	4.80683	5.16792	0.559601	0.0386864	1	+	+	+	-	-	-	Promoter (<=1kb)	9410158	9416438	6281	2	408485	#NAME?	-160	GO:0005515::protein binding
NC_037651.1	9868667	9869069	9868851;9868840;9868820	793	994	944	675	801	667	10.0441	12.8952	13.4095	9.40316	10.8671	11.5764	5.614	7.20758	7.49504	5.25576	6.074	6.47046	0.190766	0.301059	1	+	+	+	-	-	-	Promoter (2-3kb)	9865925	9943024	77100	1	408489	#NAME?	2742	GO:0003993::acid phosphatase activity;GO:0004672::protein kinase activity;GO:0004829::threonine-tRNA ligase activity;GO:0005515::protein binding;GO:0005524::ATP binding;GO:0005737::cytoplasm;GO:0006468::protein phosphorylation;GO:0008270::zinc ion binding;GO:0046872::metal ion binding;GO:0048013::ephrin receptor signaling pathway
NC_037651.1	10493399	10493920	10493501;10493770;10493511;10493767;10493529;10493761	1823	1756	1363	746	686	556	23.0736	22.7707	19.3552	10.3908	9.30885	9.65281	9.95661	9.8259	8.35206	4.48379	4.01691	4.16533	1.15138	0.00666914	1	+	+	+	-	-	-	Promoter (<=1kb)	10493370	10501816	8447	1	408500	#NAME?	29	GO:0004222::metalloendopeptidase activity;GO:0006508::proteolysis;GO:0030153::bacteriocin immunity
NC_037651.1	10322608	10323422	10322800;10322800;10323224;10322866	429	637	743	296	336	239	5.4395	8.26848	10.5574	4.13127	4.56635	4.1592	1.50338	2.28525	2.91787	1.14181	1.26205	1.14953	0.916366	0.122683	1	+	+	+	-	-	-	Intron (XM_026445046.1/413569, intron 6 of 22)	10365992	10367782	1791	2	408503	#NAME?	44360	GO:0016021::integral component of membrane
NC_037651.1	10343781	10344310	10343878;10344153;10343890;10344151;10344163	316	456	554	254	270	179	4.01005	5.92272	7.87545	3.54705	3.67205	3.1194	1.70428	2.51717	3.34708	1.5075	1.56063	1.32575	0.784516	0.152578	1	+	+	+	-	-	-	Exon (XM_026445046.1/413569, exon 12 of 23)	10365992	10367782	1791	2	408503	#NAME?	23472	GO:0016021::integral component of membrane
NC_037652.1	1365873	1366292	1366172;1366176;1366170	521	451	494	391	238	229	6.6033	5.85792	7.02405	5.45272	3.23845	3.9859	3.54143	3.14167	3.76708	2.92436	1.73682	2.13768	0.620163	0.0531692	1	+	+	+	-	-	-	Promoter (1-2kb)	1364081	1367870	3790	2	408504	#NAME?	1578	GO:0005267::potassium channel activity
NC_037652.1	1372102	1372404	1372272;1372284;1372292;1372367	376	306	312	305	260	215	4.76905	3.97872	4.44147	4.25646	3.53655	3.74328	3.54532	2.95779	3.3018	3.16426	2.62908	2.78276	0.193182	0.154119	1	+	+	+	-	-	-	Promoter (1-2kb)	1364081	1371015	6935	2	408504	#NAME?	-1087	GO:0005267::potassium channel activity
NC_037652.1	8779279	8779574	8779401;8779418;8779431	963	939	842	777	786	552	12.1946	12.1824	11.9622	10.822	10.6639	9.58349	9.27988	9.2706	9.10303	8.23535	8.11504	7.29287	0.226033	0.041399	1	+	+	+	-	-	-	Promoter (1-2kb)	8780958	8799109	18152	1	408508	#NAME?	-1384	GO:0003677::DNA binding;GO:0003824::catalytic activity;GO:0004252::serine-type endopeptidase activity;GO:0004871::signal transducer activity;GO:0005886::plasma membrane;GO:0006304::DNA modification;GO:0007165::signal transduction;GO:0008948::oxaloacetate decarboxylase activity;GO:0015081::sodium ion transmembrane transporter activity;GO:0016020::membrane;GO:0016021::integral component of membrane…
NC_037652.1	7780508	7780791	7780624;7780625;7780653	392	335	353	294	275	175	4.97145	4.35456	5.02326	4.10345	3.7398	3.05008	3.94304	3.45376	3.98413	3.2546	2.96617	2.41913	0.397532	0.0437209	1	+	+	+	-	-	-	Promoter (<=1kb)	7764850	7780109	15260	2	408517	#NAME?	-399	GO:0007276::gamete generation;GO:0016021::integral component of membrane;GO:0022857::transmembrane transporter activity;GO:0055085::transmembrane transport
NC_037652.1	7172970	7174397	7173075;7173596;7174215;7173152;7173590;7173572;7174238;7174261	1205	1862	1851	920	905	649	15.2559	24.1445	26.2799	12.8111	12.2763	11.2645	2.40645	3.80852	4.14536	2.02081	1.93645	1.77685	0.85343	0.0988689	1	+	+	+	-	-	-	Distal Intergenic	7189452	7193590	4139	1	408520	#NAME?	-15055	GO:0003677::DNA binding;GO:0003924::GTPase activity;GO:0004190::aspartic-type endopeptidase activity;GO:0005047::signal recognition particle binding;GO:0005515::protein binding;GO:0005525::GTP binding;GO:0005634::nucleus;GO:0005732::small nucleolar ribonucleoprotein complex;GO:0005785::signal recognition particle receptor complex;GO:0005944::phosphatidylinositol 3-kinase complex, class IB;GO:0006…
NC_037652.1	7149275	7149689	7149401;7149438;7149454	435	460	494	291	324	186	5.5154	5.97456	7.02405	4.06172	4.40375	3.24071	2.99361	3.24283	3.81247	2.20459	2.39024	1.75897	0.661347	0.017895	1	+	+	+	-	-	-	Distal Intergenic	7189452	7193590	4139	1	408520	#NAME?	-39763	GO:0003677::DNA binding;GO:0003924::GTPase activity;GO:0004190::aspartic-type endopeptidase activity;GO:0005047::signal recognition particle binding;GO:0005515::protein binding;GO:0005525::GTP binding;GO:0005634::nucleus;GO:0005732::small nucleolar ribonucleoprotein complex;GO:0005785::signal recognition particle receptor complex;GO:0005944::phosphatidylinositol 3-kinase complex, class IB;GO:0006…
NC_037652.1	7175018	7175268	7175116;7175140;7175131	345	426	421	348	285	234	4.3769	5.53392	5.98818	4.85459	3.8753	4.07255	3.92789	4.96622	5.37388	4.35658	3.47775	3.65476	0.312517	0.155602	1	+	+	+	-	-	-	Distal Intergenic	7189452	7193590	4139	1	408520	#NAME?	-14184	GO:0003677::DNA binding;GO:0003924::GTPase activity;GO:0004190::aspartic-type endopeptidase activity;GO:0005047::signal recognition particle binding;GO:0005515::protein binding;GO:0005525::GTP binding;GO:0005634::nucleus;GO:0005732::small nucleolar ribonucleoprotein complex;GO:0005785::signal recognition particle receptor complex;GO:0005944::phosphatidylinositol 3-kinase complex, class IB;GO:0006…
NC_037652.1	7181283	7181602	7181422;7181443;7181456	315	357	314	270	260	176	3.9974	4.63968	4.46985	3.76961	3.53655	3.06741	2.81381	3.26591	3.14637	2.65346	2.48941	2.15918	0.337417	0.0322071	1	+	+	+	-	-	-	Distal Intergenic	7189452	7193590	4139	1	408520	#NAME?	-7850	GO:0003677::DNA binding;GO:0003924::GTPase activity;GO:0004190::aspartic-type endopeptidase activity;GO:0005047::signal recognition particle binding;GO:0005515::protein binding;GO:0005525::GTP binding;GO:0005634::nucleus;GO:0005732::small nucleolar ribonucleoprotein complex;GO:0005785::signal recognition particle receptor complex;GO:0005944::phosphatidylinositol 3-kinase complex, class IB;GO:0006…
NC_037652.1	7042989	7043595	7043114;7043114;7043153;7043491	379	574	589	218	205	149	4.807	7.452	8.3721	3.04629	2.7913	2.5995	1.78382	2.76535	3.10679	1.13044	1.03582	0.964645	1.29	0.0607051	1	+	+	+	-	-	-	Distal Intergenic	7000631	7038341	37711	2	408521	NM_001011629.1	-4648	GO:0000775::chromosome, centromeric region;GO:0000921::septin ring assembly;GO:0003677::DNA binding;GO:0003682::chromatin binding;GO:0003743::translation initiation factor activity;GO:0003779::actin binding;GO:0003824::catalytic activity;GO:0004872::receptor activity;GO:0005215::transporter activity;GO:0005634::nucleus;GO:0005672::transcription factor TFIIA complex;GO:0005739::mitochondrion;GO:00…
NC_037652.1	7104080	7104571	7104258;7104278;7104408	1296	1327	777	647	461	256	16.407	17.2109	11.0398	9.01368	6.2601	4.45381	7.51157	7.87961	5.05432	4.12671	2.86604	2.03907	1.17869	0.029397	1	+	+	+	-	-	-	Distal Intergenic	7000631	7038341	37711	2	408521	NM_001011629.1	-65739	GO:0000775::chromosome, centromeric region;GO:0000921::septin ring assembly;GO:0003677::DNA binding;GO:0003682::chromatin binding;GO:0003743::translation initiation factor activity;GO:0003779::actin binding;GO:0003824::catalytic activity;GO:0004872::receptor activity;GO:0005215::transporter activity;GO:0005634::nucleus;GO:0005672::transcription factor TFIIA complex;GO:0005739::mitochondrion;GO:00…
NC_037652.1	7033632	7034272	7033723;7034075;7034093;7034100	383	610	618	225	239	192	4.8576	7.91856	8.78361	3.14366	3.252	3.34469	1.70699	2.78263	3.08661	1.1047	1.14277	1.17534	1.1463	0.080154	1	+	+	+	-	-	-	Intron (XM_006563323.3/408521, intron 1 of 8)	6989419	7037855	48437	2	408521	#NAME?	3583	GO:0000775::chromosome, centromeric region;GO:0000921::septin ring assembly;GO:0003677::DNA binding;GO:0003682::chromatin binding;GO:0003743::translation initiation factor activity;GO:0003779::actin binding;GO:0003824::catalytic activity;GO:0004872::receptor activity;GO:0005215::transporter activity;GO:0005634::nucleus;GO:0005672::transcription factor TFIIA complex;GO:0005739::mitochondrion;GO:00…
NC_037652.1	7109581	7110090	7109743;7109739;7109900	653	903	538	346	280	161	8.2731	11.7158	7.64841	4.82677	3.80755	2.80746	3.65397	5.1745	3.37806	2.13183	1.68167	1.23997	1.27231	0.0340659	1	+	+	+	-	-	-	Distal Intergenic	7000631	7038341	37711	2	408521	NM_001011629.1	-71240	GO:0000775::chromosome, centromeric region;GO:0000921::septin ring assembly;GO:0003677::DNA binding;GO:0003682::chromatin binding;GO:0003743::translation initiation factor activity;GO:0003779::actin binding;GO:0003824::catalytic activity;GO:0004872::receptor activity;GO:0005215::transporter activity;GO:0005634::nucleus;GO:0005672::transcription factor TFIIA complex;GO:0005739::mitochondrion;GO:00…
NC_037653.1	7021978	7022296	7022133;7022131;7022138	724	753	851	372	433	330	9.17125	9.77184	12.0899	5.18843	5.8807	5.73623	6.47596	6.90005	8.53687	3.66363	4.15245	4.05044	0.884881	0.028043	1	+	+	+	-	-	-	Exon (XM_006563124.3/408551, exon 4 of 27)	6992891	7033121	40231	1	408551	#NAME?	29087	GO:0000062::fatty-acyl-CoA binding;GO:0005201::extracellular matrix structural constituent;GO:0005578::proteinaceous extracellular matrix;GO:0005581::collagen trimer;GO:0007275::multicellular organismal development;GO:0019217::regulation of fatty acid metabolic process
NC_037653.1	6459293	6459767	6459449;6459478;6459460	566	734	632	326	295	300	7.17255	9.5256	8.98227	4.54857	4.0108	5.21633	3.40131	4.51716	4.2595	2.15699	1.90197	2.47365	0.898543	0.0164818	1	+	+	+	-	-	-	Promoter (2-3kb)	6456567	6607687	151121	1	408562	#NAME?	2726	GO:0000398::mRNA splicing, via spliceosome;GO:0004190::aspartic-type endopeptidase activity;GO:0005634::nucleus;GO:0005681::spliceosomal complex;GO:0006270::DNA replication initiation;GO:0006629::lipid metabolic process;GO:0007411::axon guidance;GO:0008083::growth factor activity;GO:0008270::zinc ion binding;GO:0009297::pilus assembly;GO:0016020::membrane;GO:0016021::integral component of membran…
NC_037653.1	6483270	6483572	6483389;6483417;6483432	250	230	231	191	223	180	3.17515	2.99376	3.29208	2.67072	3.0352	3.13673	2.36041	2.22557	2.44734	1.98542	2.25637	2.33185	0.0975124	0.294849	1	+	+	+	-	-	-	Intron (XM_006563151.3/408562, intron 1 of 2)	6456567	6607687	151121	1	408562	#NAME?	26703	GO:0000398::mRNA splicing, via spliceosome;GO:0004190::aspartic-type endopeptidase activity;GO:0005634::nucleus;GO:0005681::spliceosomal complex;GO:0006270::DNA replication initiation;GO:0006629::lipid metabolic process;GO:0007411::axon guidance;GO:0008083::growth factor activity;GO:0008270::zinc ion binding;GO:0009297::pilus assembly;GO:0016020::membrane;GO:0016021::integral component of membran…
NC_037653.1	6517559	6517998	6517786;6517754;6517792	374	345	333	181	179	139	4.74375	4.48416	4.73946	2.53162	2.439	2.4262	2.42849	2.29559	2.42629	1.29602	1.24861	1.24205	0.917083	0.000423034	1	+	+	+	-	-	-	Intron (XM_006563151.3/408562, intron 1 of 2)	6456567	6607687	151121	1	408562	#NAME?	60992	GO:0000398::mRNA splicing, via spliceosome;GO:0004190::aspartic-type endopeptidase activity;GO:0005634::nucleus;GO:0005681::spliceosomal complex;GO:0006270::DNA replication initiation;GO:0006629::lipid metabolic process;GO:0007411::axon guidance;GO:0008083::growth factor activity;GO:0008270::zinc ion binding;GO:0009297::pilus assembly;GO:0016020::membrane;GO:0016021::integral component of membran…
NC_037653.1	6449032	6449337	6449206;6449195;6449221	328	422	365	332	266	146	4.16185	5.48208	5.19354	4.63203	3.61785	2.54751	3.0636	4.03544	3.82304	3.4097	2.66315	1.87526	0.458562	0.146552	1	+	+	+	-	-	-	Intron (XR_120113.4/100578474, intron 2 of 2)	6456567	6577971	121405	1	408562	#NAME?	-7230	GO:0000398::mRNA splicing, via spliceosome;GO:0004190::aspartic-type endopeptidase activity;GO:0005634::nucleus;GO:0005681::spliceosomal complex;GO:0006270::DNA replication initiation;GO:0006629::lipid metabolic process;GO:0007411::axon guidance;GO:0008083::growth factor activity;GO:0008270::zinc ion binding;GO:0009297::pilus assembly;GO:0016020::membrane;GO:0016021::integral component of membran…
NC_037653.1	6507186	6507694	6507369;6507370;6507373	432	420	459	347	340	171	5.47745	5.45616	6.5274	4.84068	4.62055	2.98076	2.42397	2.41455	2.88861	2.14218	2.04476	1.31909	0.48892	0.084948	1	+	+	+	-	-	-	Intron (XM_006563151.3/408562, intron 1 of 2)	6456567	6607687	151121	1	408562	#NAME?	50619	GO:0000398::mRNA splicing, via spliceosome;GO:0004190::aspartic-type endopeptidase activity;GO:0005634::nucleus;GO:0005681::spliceosomal complex;GO:0006270::DNA replication initiation;GO:0006629::lipid metabolic process;GO:0007411::axon guidance;GO:0008083::growth factor activity;GO:0008270::zinc ion binding;GO:0009297::pilus assembly;GO:0016020::membrane;GO:0016021::integral component of membran…
NC_037653.1	6502795	6503176	6502929;6503041;6502978	283	281	341	142	183	163	3.5926	3.65472	4.85298	1.98913	2.4932	2.84212	2.11842	2.15505	2.86162	1.17291	1.47015	1.67589	0.72425	0.0392974	1	+	+	+	-	-	-	Intron (XM_006563151.3/408562, intron 1 of 2)	6456567	6607687	151121	1	408562	#NAME?	46228	GO:0000398::mRNA splicing, via spliceosome;GO:0004190::aspartic-type endopeptidase activity;GO:0005634::nucleus;GO:0005681::spliceosomal complex;GO:0006270::DNA replication initiation;GO:0006629::lipid metabolic process;GO:0007411::axon guidance;GO:0008083::growth factor activity;GO:0008270::zinc ion binding;GO:0009297::pilus assembly;GO:0016020::membrane;GO:0016021::integral component of membran…
NC_037653.1	6493978	6494244	6494112;6494134;6494143	244	217	245	145	160	137	3.09925	2.82528	3.49074	2.03086	2.18155	2.39154	2.61464	2.38351	2.94491	1.71331	1.84043	2.01759	0.511673	0.0223889	1	+	+	+	-	-	-	Intron (XM_006563151.3/408562, intron 1 of 2)	6456567	6607687	151121	1	408562	#NAME?	37411	GO:0000398::mRNA splicing, via spliceosome;GO:0004190::aspartic-type endopeptidase activity;GO:0005634::nucleus;GO:0005681::spliceosomal complex;GO:0006270::DNA replication initiation;GO:0006629::lipid metabolic process;GO:0007411::axon guidance;GO:0008083::growth factor activity;GO:0008270::zinc ion binding;GO:0009297::pilus assembly;GO:0016020::membrane;GO:0016021::integral component of membran…
NC_037653.1	6495590	6495864	6495727;6495747;6495804	233	219	295	138	131	90	2.9601	2.8512	4.20024	1.93349	1.7886	1.57703	2.4246	2.3354	3.44039	1.58371	1.46503	1.29174	0.917839	0.0611461	1	+	+	+	-	-	-	Intron (XM_006563151.3/408562, intron 1 of 2)	6456567	6607687	151121	1	408562	#NAME?	39023	GO:0000398::mRNA splicing, via spliceosome;GO:0004190::aspartic-type endopeptidase activity;GO:0005634::nucleus;GO:0005681::spliceosomal complex;GO:0006270::DNA replication initiation;GO:0006629::lipid metabolic process;GO:0007411::axon guidance;GO:0008083::growth factor activity;GO:0008270::zinc ion binding;GO:0009297::pilus assembly;GO:0016020::membrane;GO:0016021::integral component of membran…
NC_037653.1	6669947	6670660	6670373;6670390;6670358	1466	1167	587	451	356	193	18.5575	15.1373	8.34372	6.28732	4.83735	3.36202	5.85447	4.77548	2.63226	1.98351	1.52607	1.06064	1.53698	0.082766	1	+	+	+	-	-	-	Promoter (1-2kb)	6671910	6682385	10476	1	408563	#NAME?	-1250	GO:0005815::microtubule organizing center;GO:0006606::protein import into nucleus
NC_037653.1	6679546	6680468	6679793;6680096;6680334;6679789;6680086;6680336;6679793	1154	1361	1211	944	669	612	14.6107	17.6515	17.1983	13.1449	9.0785	10.6233	3.56563	4.30771	4.19711	3.20791	2.21554	2.59253	0.590528	0.0236227	1	+	+	+	-	-	-	Exon (XM_006563138.3/408563, exon 10 of 15)	6671910	6682385	10476	1	408563	#NAME?	7636	GO:0005815::microtubule organizing center;GO:0006606::protein import into nucleus
NC_037638.1	117736	118258	117891;117886;117891	522	584	610	259	207	189	6.61595	7.5816	8.67009	3.6166	2.8184	3.2927	2.84942	3.26532	3.73412	1.55763	1.21386	1.41813	1.23314	0.00986364	1	+	+	+	-	-	-	Promoter (<=1kb)	117757	122443	4687	1	408565	#NAME?	0	GO:0003676::nucleic acid binding;GO:0008270::zinc ion binding
NC_037638.1	22757768	22758334	22757913;22757973;22757942	314	386	502	226	218	194	3.98475	5.01552	7.13757	3.15757	2.96745	3.37935	1.58301	1.9925	2.83553	1.2544	1.17887	1.34251	0.763785	0.137924	1	+	+	+	-	-	-	Intron (XM_026445234.1/724282, intron 3 of 5)	22768508	22772618	4111	2	408568	#NAME?	14284	GO:0005515::protein binding
NC_037638.1	21466323	21467066	21466632;21466628;21466645	719	936	1073	589	427	326	9.108	12.1435	15.2401	8.2069	5.7994	5.66691	2.75751	3.67652	4.61404	2.48469	1.75581	1.71569	0.891332	0.0686261	1	+	+	+	-	-	-	Exon (XM_026446499.1/413968, exon 53 of 57)	21473394	21485838	12445	1	408572	#NAME?	-6328	GO:0004668::protein-arginine deiminase activity;GO:0005515::protein binding;GO:0009446::putrescine biosynthetic process
NC_037638.1	21325735	21326120	21325940;21326018;21325985	243	320	262	166	172	123	3.0866	4.16016	3.73197	2.32297	2.34415	2.14892	1.80119	2.42767	2.1778	1.35557	1.36793	1.25401	0.687705	0.0424674	1	+	+	+	-	-	-	Intron (XM_026446499.1/413968, intron 41 of 56)	21473394	21485838	12445	1	408572	#NAME?	-147274	GO:0004668::protein-arginine deiminase activity;GO:0005515::protein binding;GO:0009446::putrescine biosynthetic process
NC_037638.1	21320220	21320622	21320490;21320375;21320481	302	310	275	216	242	129	3.83295	4.03056	3.91644	3.01847	3.29265	2.2529	2.14237	2.25282	2.18904	1.68713	1.84038	1.25923	0.459973	0.0703903	1	+	+	+	-	-	-	Intron (XM_026446499.1/413968, intron 41 of 56)	21473394	21485838	12445	1	408572	#NAME?	-152772	GO:0004668::protein-arginine deiminase activity;GO:0005515::protein binding;GO:0009446::putrescine biosynthetic process
NC_037638.1	21304319	21304695	21304498;21304528;21304530	263	260	311	156	194	121	3.3396	3.38256	4.42728	2.18387	2.64225	2.11426	1.99535	2.02102	2.64522	1.30482	1.5787	1.26323	0.683885	0.0410905	1	+	+	+	-	-	-	Intron (XM_026446499.1/413968, intron 41 of 56)	21473394	21485838	12445	1	408572	#NAME?	-168699	GO:0004668::protein-arginine deiminase activity;GO:0005515::protein binding;GO:0009446::putrescine biosynthetic process
NC_037638.1	21443398	21443682	21443538;21443580;21443611	199	201	262	162	155	130	2.53	2.61792	3.73197	2.26733	2.1138	2.27023	1.9996	2.06908	2.94958	1.79199	1.67065	1.79429	0.416892	0.192915	1	+	+	+	-	-	-	Intron (XM_026446499.1/413968, intron 45 of 56)	21473394	21485838	12445	1	408572	#NAME?	-29712	GO:0004668::protein-arginine deiminase activity;GO:0005515::protein binding;GO:0009446::putrescine biosynthetic process
NC_037638.1	21356201	21356691	21356435;21356456;21356449	278	418	481	229	218	133	3.52935	5.43024	6.83958	3.1993	2.96745	2.32222	1.61912	2.49117	3.13772	1.46771	1.36135	1.06534	0.896187	0.117601	1	+	+	+	-	-	-	Intron (XM_026446499.1/413968, intron 41 of 56)	21473394	21485838	12445	1	408572	#NAME?	-116703	GO:0004668::protein-arginine deiminase activity;GO:0005515::protein binding;GO:0009446::putrescine biosynthetic process
NC_037638.1	21415187	21415735	21415345;21415317;21415339;21415608	497	566	535	484	537	407	6.2997	7.34832	7.60584	6.74635	7.2899	7.07064	2.58472	3.01496	3.12062	2.76798	2.991	2.90103	0.0100109	0.917384	1	+	+	+	-	-	-	Intron (XM_026446499.1/413968, intron 45 of 56)	21473394	21485838	12445	1	408572	#NAME?	-57659	GO:0004668::protein-arginine deiminase activity;GO:0005515::protein binding;GO:0009446::putrescine biosynthetic process
NC_037638.1	21397518	21398109	21397692;21397718;21397716	317	468	532	232	266	143	4.0227	6.07824	7.56327	3.24103	3.61785	2.49552	1.5306	2.31272	2.87776	1.23318	1.37656	0.949524	0.917112	0.10296	1	+	+	+	-	-	-	Intron (XM_026446499.1/413968, intron 43 of 56)	21473394	21485838	12445	1	408572	#NAME?	-75285	GO:0004668::protein-arginine deiminase activity;GO:0005515::protein binding;GO:0009446::putrescine biosynthetic process
NC_037638.1	20279903	20280357	20280169;20280118;20280083	288	394	434	223	183	149	3.65585	5.1192	6.17265	3.11584	2.4932	2.5995	1.80985	2.5343	3.05581	1.54252	1.23428	1.2869	0.864726	0.0827519	1	+	+	+	-	-	-	3' UTR	20275914	20277955	2042	1	408575	#NAME?	3989	GO:0005634::nucleus;GO:0045892::negative regulation of transcription, DNA-templated
NC_037638.1	18850067	18850361	18850177;18850216;18850197	223	280	271	112	161	122	2.8336	3.64176	3.85968	1.57183	2.1951	2.13159	2.16363	2.78071	2.94711	1.20019	1.6761	1.6276	0.809119	0.0222827	1	+	+	+	-	-	-	Promoter (1-2kb)	18848644	18889873	41230	1	408579	#NAME?	1423	GO:0004222::metalloendopeptidase activity;GO:0005576::extracellular region;GO:0008233::peptidase activity;GO:0031012::extracellular matrix
NC_037638.1	16039176	16039567	16039356;16039369;16039366	456	399	473	189	168	154	5.78105	5.184	6.72606	2.6429	2.28995	2.68615	3.3219	2.97883	3.86493	1.51866	1.31585	1.54351	1.21535	0.0124845	1	+	+	+	-	-	-	Intron (XR_003306105.1/408586, intron 8 of 8)	16047963	16049284	1322	1	408585	#NAME?	-8396	GO:0003677::DNA binding;GO:0007067::mitotic nuclear division;GO:0051382::kinetochore assembly
NC_037638.1	16038118	16038602	16038334;16038284;16038303	338	503	560	216	221	127	4.28835	6.53184	7.96059	3.01847	3.0081	2.21824	1.99166	3.03361	3.69718	1.40188	1.39707	1.03023	1.1877	0.0737587	1	+	+	+	-	-	-	3' UTR	16030212	16039045	8834	1	408586	#NAME?	7906	GO:0001503::ossification;GO:0003700::sequence-specific DNA binding transcription factor activity;GO:0005576::extracellular region;GO:0005634::nucleus;GO:0006355::regulation of transcription, DNA-templated;GO:0007155::cell adhesion;GO:0008270::zinc ion binding;GO:0016020::membrane;GO:0043401::steroid hormone mediated signaling pathway;GO:0043565::sequence-specific DNA binding
NC_037638.1	15936447	15936820	15936638;15936631;15936649	440	432	444	201	242	154	5.57865	5.61168	6.31455	2.80982	3.29265	2.68615	3.35988	3.37978	3.8031	1.69228	1.98308	1.6178	0.994049	0.000892178	1	+	+	+	-	-	-	Intron (XM_026445298.1/408586, intron 1 of 7)	15929284	16039045	109762	1	408586	#NAME?	7163	GO:0001503::ossification;GO:0003700::sequence-specific DNA binding transcription factor activity;GO:0005576::extracellular region;GO:0005634::nucleus;GO:0006355::regulation of transcription, DNA-templated;GO:0007155::cell adhesion;GO:0008270::zinc ion binding;GO:0016020::membrane;GO:0043401::steroid hormone mediated signaling pathway;GO:0043565::sequence-specific DNA binding
NC_037638.1	15993334	15993720	15993558;15993565;15993599	239	287	336	250	196	150	3.036	3.73248	4.78203	3.49141	2.66935	2.61683	1.76708	2.17247	2.78335	2.03215	1.55368	1.52311	0.39606	0.206038	1	+	+	+	-	-	-	Intron (XM_026445298.1/408586, intron 1 of 7)	15975258	16039045	63788	1	408586	#NAME?	18076	GO:0001503::ossification;GO:0003700::sequence-specific DNA binding transcription factor activity;GO:0005576::extracellular region;GO:0005634::nucleus;GO:0006355::regulation of transcription, DNA-templated;GO:0007155::cell adhesion;GO:0008270::zinc ion binding;GO:0016020::membrane;GO:0043401::steroid hormone mediated signaling pathway;GO:0043565::sequence-specific DNA binding
NC_037638.1	10951204	10951698	10951518;10951525;10951590	435	617	538	333	301	221	5.5154	8.00928	7.64841	4.64594	4.0921	3.84726	2.5098	3.64464	3.48043	2.11415	1.86212	1.7507	0.750492	0.0562333	1	+	+	+	-	-	-	Exon (XM_006568632.3/408594, exon 15 of 29)	10940386	10960478	20093	2	408594	#NAME?	8780	GO:0003677::DNA binding;GO:0004672::protein kinase activity;GO:0005089::Rho guanyl-nucleotide exchange factor activity;GO:0005515::protein binding;GO:0005524::ATP binding;GO:0006355::regulation of transcription, DNA-templated;GO:0006468::protein phosphorylation;GO:0035023::regulation of Rho protein signal transduction
NC_037638.1	10975871	10976265	10976107;10976086;10976032	285	355	235	241	233	114	3.6179	4.61376	3.34884	3.36622	3.1707	1.99295	2.06313	2.63102	1.90969	1.91961	1.80811	1.13649	0.441102	0.153181	1	+	+	+	-	-	-	Promoter (<=1kb)	10970897	10976129	5233	2	408595	#NAME?	0	GO:0004930::G-protein coupled receptor activity;GO:0005515::protein binding;GO:0016020::membrane
NC_037638.1	10244506	10244763	10244639;10244652;10244626	206	259	226	130	154	116	2.61855	3.3696	3.22113	1.82221	2.10025	2.02761	2.28617	2.94188	2.81226	1.59091	1.83366	1.77024	0.630182	0.0302964	1	+	+	+	-	-	-	3' UTR	10227101	10231510	4410	1	408600	#NAME?	17405	GO:0005509::calcium ion binding
NC_037638.1	10249814	10250371	10249920;10250205;10249922;10250236;10249919;10250219	391	430	391	328	317	166	4.9588	5.58576	5.56248	4.57639	4.3089	2.89411	2.00175	2.25483	2.24544	1.84738	1.7394	1.16828	0.451425	0.0949594	1	+	+	+	-	-	-	Intron (XM_026446284.1/725189, intron 3 of 7)	10227101	10231510	4410	1	408600	#NAME?	22713	GO:0005509::calcium ion binding
NC_037638.1	8527269	8527529	8527414;8527406;8527420	483	453	495	312	253	199	6.1226	5.88384	7.03824	4.35383	3.4417	3.466	5.28399	5.07793	6.07421	3.75749	2.97029	2.99126	0.757985	0.00533354	1	+	+	+	-	-	-	Exon (XM_026444045.1/408602, exon 12 of 15)	8533202	8534672	1471	1	408601	#NAME?	-5673	GO:0006801::superoxide metabolic process;GO:0046872::metal ion binding;GO:0055114::oxidation-reduction process
NC_037638.1	8496581	8496960	8496754;8496776;8496771	690	525	500	148	339	170	8.74115	6.81696	7.10919	2.07259	4.607	2.96343	5.18145	4.04086	4.21408	1.22856	2.73087	1.75662	1.23306	0.011513	1	+	+	+	-	-	-	Promoter (2-3kb)	8499748	8533011	33264	1	408602	#NAME?	-2788	GO:0003677::DNA binding;GO:0003887::DNA-directed DNA polymerase activity;GO:0004003::ATP-dependent DNA helicase activity;GO:0004190::aspartic-type endopeptidase activity;GO:0005524::ATP binding;GO:0005525::GTP binding;GO:0005634::nucleus;GO:0006260::DNA replication;GO:0006270::DNA replication initiation;GO:0006351::transcription, DNA-templated;GO:0006359::regulation of transcription from RNA poly…
NC_037638.1	8277907	8278254	8278062;8278078;8278046	581	770	633	235	210	100	7.3623	9.99216	8.99646	3.28276	2.85905	1.75033	4.76542	6.46765	5.82316	2.12484	1.85058	1.13294	1.73936	0.00474993	1	+	+	+	-	-	-	Promoter (2-3kb)	8280923	8533011	252089	1	408602	#NAME?	-2669	GO:0003677::DNA binding;GO:0003887::DNA-directed DNA polymerase activity;GO:0004003::ATP-dependent DNA helicase activity;GO:0004190::aspartic-type endopeptidase activity;GO:0005524::ATP binding;GO:0005525::GTP binding;GO:0005634::nucleus;GO:0006260::DNA replication;GO:0006270::DNA replication initiation;GO:0006351::transcription, DNA-templated;GO:0006359::regulation of transcription from RNA poly…
NC_037638.1	8407861	8408292	8408105;8408124;8408136	299	453	481	211	240	166	3.795	5.88384	6.83958	2.94892	3.26555	2.89411	1.97877	3.06792	3.56625	1.53761	1.7027	1.50903	0.858778	0.108544	1	+	+	+	-	-	-	Promoter (1-2kb)	8406504	8533011	126508	1	408602	#NAME?	1357	GO:0003677::DNA binding;GO:0003887::DNA-directed DNA polymerase activity;GO:0004003::ATP-dependent DNA helicase activity;GO:0004190::aspartic-type endopeptidase activity;GO:0005524::ATP binding;GO:0005525::GTP binding;GO:0005634::nucleus;GO:0006260::DNA replication;GO:0006270::DNA replication initiation;GO:0006351::transcription, DNA-templated;GO:0006359::regulation of transcription from RNA poly…
NC_037638.1	8515733	8516125	8515922;8515919;8515933	246	313	419	174	204	128	3.12455	4.06944	5.9598	2.43425	2.77775	2.23557	1.79086	2.33243	3.4159	1.39521	1.59209	1.28133	0.820637	0.145638	1	+	+	+	-	-	-	Intron (XM_026444045.1/408602, intron 5 of 14)	8499748	8533011	33264	1	408602	#NAME?	15985	GO:0003677::DNA binding;GO:0003887::DNA-directed DNA polymerase activity;GO:0004003::ATP-dependent DNA helicase activity;GO:0004190::aspartic-type endopeptidase activity;GO:0005524::ATP binding;GO:0005525::GTP binding;GO:0005634::nucleus;GO:0006260::DNA replication;GO:0006270::DNA replication initiation;GO:0006351::transcription, DNA-templated;GO:0006359::regulation of transcription from RNA poly…
NC_037638.1	8251232	8251616	8251326;8251552;8251432;8251414	391	327	278	260	239	183	4.9588	4.25088	3.95901	3.63051	3.252	3.18872	2.90123	2.48705	2.31629	2.12409	1.90264	1.86562	0.386872	0.0554371	1	+	+	+	-	-	-	Intron (XM_026444045.1/408602, intron 1 of 14)	8247253	8533011	285759	1	408602	#NAME?	3979	GO:0003677::DNA binding;GO:0003887::DNA-directed DNA polymerase activity;GO:0004003::ATP-dependent DNA helicase activity;GO:0004190::aspartic-type endopeptidase activity;GO:0005524::ATP binding;GO:0005525::GTP binding;GO:0005634::nucleus;GO:0006260::DNA replication;GO:0006270::DNA replication initiation;GO:0006351::transcription, DNA-templated;GO:0006359::regulation of transcription from RNA poly…
NC_037638.1	8508152	8508537	8508261;8508319;8508375	297	360	377	202	210	128	3.7697	4.67856	5.36382	2.82373	2.85905	2.23557	2.19981	2.73018	3.13007	1.64779	1.6684	1.30457	0.802659	0.035225	1	+	+	+	-	-	-	Intron (XM_026444045.1/408602, intron 5 of 14)	8499748	8533011	33264	1	408602	#NAME?	8404	GO:0003677::DNA binding;GO:0003887::DNA-directed DNA polymerase activity;GO:0004003::ATP-dependent DNA helicase activity;GO:0004190::aspartic-type endopeptidase activity;GO:0005524::ATP binding;GO:0005525::GTP binding;GO:0005634::nucleus;GO:0006260::DNA replication;GO:0006270::DNA replication initiation;GO:0006351::transcription, DNA-templated;GO:0006359::regulation of transcription from RNA poly…
NC_037638.1	8256124	8256577	8256228;8256419;8256253;8256471;8256386	325	323	311	207	216	136	4.1239	4.19904	4.42728	2.89328	2.94035	2.37421	2.04606	2.08334	2.19658	1.43549	1.45885	1.17796	0.635448	0.00528106	1	+	+	+	-	-	-	Intron (XM_026444045.1/408602, intron 1 of 14)	8247253	8533011	285759	1	408602	#NAME?	8871	GO:0003677::DNA binding;GO:0003887::DNA-directed DNA polymerase activity;GO:0004003::ATP-dependent DNA helicase activity;GO:0004190::aspartic-type endopeptidase activity;GO:0005524::ATP binding;GO:0005525::GTP binding;GO:0005634::nucleus;GO:0006260::DNA replication;GO:0006270::DNA replication initiation;GO:0006351::transcription, DNA-templated;GO:0006359::regulation of transcription from RNA poly…
NC_037638.1	4999227	4999584	4999391;4999390;4999436	259	316	294	174	139	98	3.289	4.10832	4.18605	2.43425	1.897	1.71567	2.06941	2.58492	2.63383	1.53161	1.19358	1.07949	0.937783	0.00827845	1	+	+	+	-	-	-	Intron (XM_006562525.3/408616, intron 1 of 9)	4829148	5009061	179914	2	408616	#NAME?	9477	GO:0003677::DNA binding;GO:0003700::sequence-specific DNA binding transcription factor activity;GO:0003918::DNA topoisomerase type II (ATP-hydrolyzing) activity;GO:0005515::protein binding;GO:0005634::nucleus;GO:0005694::chromosome;GO:0006265::DNA topological change;GO:0006355::regulation of transcription, DNA-templated
NC_037638.1	5005989	5006384	5006199;5006213;5006213	2531	2273	1632	903	1159	1144	32.0298	29.471	23.1723	12.5746	15.718	19.8429	18.219	16.7636	13.1808	7.15263	8.94064	11.2869	0.814802	0.0243533	1	+	+	+	-	-	-	Promoter (2-3kb)	4829148	5009061	179914	2	408616	#NAME?	2677	GO:0003677::DNA binding;GO:0003700::sequence-specific DNA binding transcription factor activity;GO:0003918::DNA topoisomerase type II (ATP-hydrolyzing) activity;GO:0005515::protein binding;GO:0005634::nucleus;GO:0005694::chromosome;GO:0006265::DNA topological change;GO:0006355::regulation of transcription, DNA-templated
NC_037638.1	5005212	5005460	5005332;5005323;5005351	820	580	545	432	452	478	10.3857	7.52976	7.74774	6.02303	6.13815	8.30107	9.39513	6.81159	7.00878	5.44857	5.55271	7.50933	0.326736	0.218622	1	+	+	+	-	-	-	Intron (XM_006562525.3/408616, intron 1 of 9)	4829148	5009061	179914	2	408616	#NAME?	3601	GO:0003677::DNA binding;GO:0003700::sequence-specific DNA binding transcription factor activity;GO:0003918::DNA topoisomerase type II (ATP-hydrolyzing) activity;GO:0005515::protein binding;GO:0005634::nucleus;GO:0005694::chromosome;GO:0006265::DNA topological change;GO:0006355::regulation of transcription, DNA-templated
NC_037638.1	3170974	3171395	3171220;3171230;3171240	422	341	302	238	186	195	5.35095	4.43232	4.29957	3.32449	2.53385	3.39668	2.85618	2.36584	2.29498	1.77451	1.35249	1.81305	0.60563	0.0213571	1	+	+	+	-	-	-	Promoter (1-2kb)	3168356	3173049	4694	2	408622	#NAME?	1654	GO:0008152::metabolic process;GO:0016597::amino acid binding;GO:0016714::oxidoreductase activity, acting on paired donors, with incorporation or reduction of molecular oxygen, reduced pteridine as one donor, and incorporation of one atom of oxygen;GO:0055114::oxidation-reduction process
NC_037638.1	3170208	3170476	3170326;3170340;3170364	213	274	230	152	131	106	2.7071	3.564	3.27789	2.12823	1.7886	1.85431	2.26683	2.98436	2.74479	1.7821	1.49771	1.55273	0.726492	0.024659	1	+	+	+	-	-	-	Promoter (2-3kb)	3168356	3173049	4694	2	408622	#NAME?	2573	GO:0008152::metabolic process;GO:0016597::amino acid binding;GO:0016714::oxidoreductase activity, acting on paired donors, with incorporation or reduction of molecular oxygen, reduced pteridine as one donor, and incorporation of one atom of oxygen;GO:0055114::oxidation-reduction process
NC_037638.1	2545227	2545534	2545401;2545388;2545397	295	264	197	208	163	104	3.7444	3.4344	2.80962	2.90719	2.2222	1.81965	2.73841	2.51169	2.05477	2.12613	1.62517	1.33077	0.523443	0.0746583	1	+	+	+	-	-	-	3' UTR	2521875	2539536	17662	1	408623	#NAME?	23352	GO:0005515::protein binding;GO:0005737::cytoplasm;GO:0005739::mitochondrion;GO:0007009::plasma membrane organization;GO:0009523::photosystem II;GO:0009539::photosystem II reaction center;GO:0015979::photosynthesis;GO:0016020::membrane
NC_037638.1	24401666	24402070	24401880;24401874;24401877	283	460	417	189	190	98	3.5926	5.97456	5.93142	2.6429	2.58805	1.71567	1.99811	3.3229	3.29891	1.46991	1.43941	0.954213	1.15775	0.0540276	1	+	+	+	-	-	-	Exon (XM_026445667.1/551071, exon 25 of 32)	24393087	24394104	1018	2	408642	#NAME?	-7562	.
NC_037638.1	23332965	23333342	23333107;23333079;23333285	281	269	214	213	202	96	3.5673	3.4992	3.05085	2.97674	2.75065	1.68101	2.12576	2.08518	1.81801	1.77384	1.63912	1.00172	0.449598	0.139544	1	+	+	+	-	-	-	Intron (XR_003305640.1/725415, intron 2 of 2)	23319490	23327025	7536	2	408646	#NAME?	-5940	GO:0016021::integral component of membrane;GO:0055085::transmembrane transport
NC_037638.1	23328794	23329139	23328970;23328956;23328964	318	324	376	149	162	141	4.03535	4.212	5.34963	2.0865	2.20865	2.46086	2.62707	2.74207	3.48268	1.35834	1.43786	1.60205	1.00904	0.0247093	1	+	+	+	-	-	-	Promoter (1-2kb)	23319490	23327025	7536	2	408646	#NAME?	-1769	GO:0016021::integral component of membrane;GO:0055085::transmembrane transport
NC_037639.1	15796887	15797282	15797150;15797146;15797178	1557	1430	1361	1065	862	577	19.7087	18.5458	19.3268	14.8281	11.6936	10.0167	11.2106	10.5491	10.9934	8.43445	6.6515	5.69765	0.656187	0.0321376	1	+	+	+	-	-	-	Intron (XM_006568750.3/408649, intron 5 of 8)	15784750	15803288	18539	2	408649	#NAME?	6006	GO:0003743::translation initiation factor activity;GO:0005215::transporter activity;GO:0005737::cytoplasm;GO:0005852::eukaryotic translation initiation factor 3 complex;GO:0006811::ion transport;GO:0008982::protein-N(PI)-phosphohistidine-sugar phosphotransferase activity;GO:0009401::phosphoenolpyruvate-dependent sugar phosphotransferase system;GO:0016020::membrane;GO:0016021::integral component o…
NC_037639.1	15799559	15799837	15799699;15799702;15799713	1300	1214	1352	701	712	500	16.4577	15.7464	19.1991	9.76482	9.66115	8.68233	13.2871	12.7129	15.5004	7.88364	7.79994	7.00969	0.870862	0.0115356	1	+	+	+	-	-	-	Exon (XM_006568750.3/408649, exon 3 of 9)	15784750	15803288	18539	2	408649	#NAME?	3451	GO:0003743::translation initiation factor activity;GO:0005215::transporter activity;GO:0005737::cytoplasm;GO:0005852::eukaryotic translation initiation factor 3 complex;GO:0006811::ion transport;GO:0008982::protein-N(PI)-phosphohistidine-sugar phosphotransferase activity;GO:0009401::phosphoenolpyruvate-dependent sugar phosphotransferase system;GO:0016020::membrane;GO:0016021::integral component o…
NC_037639.1	15794178	15794887	15794299;15794497;15794479;15794751;15794493	2414	2262	2159	1415	1198	1156	30.5497	29.3285	30.6504	19.6966	16.2464	20.0508	9.69204	9.30461	9.72399	6.24884	5.15425	6.36121	0.693107	0.00596219	1	+	+	+	-	-	-	Intron (XM_006568750.3/408649, intron 6 of 8)	15784750	15803288	18539	2	408649	#NAME?	8401	GO:0003743::translation initiation factor activity;GO:0005215::transporter activity;GO:0005737::cytoplasm;GO:0005852::eukaryotic translation initiation factor 3 complex;GO:0006811::ion transport;GO:0008982::protein-N(PI)-phosphohistidine-sugar phosphotransferase activity;GO:0009401::phosphoenolpyruvate-dependent sugar phosphotransferase system;GO:0016020::membrane;GO:0016021::integral component o…
NC_037639.1	15992349	15993211	15992420;15992727;15992709;15993023;15992734	666	744	842	455	416	382	8.43755	9.6552	11.9622	6.34296	5.65035	6.63739	2.20228	2.5201	3.12224	1.65557	1.47479	1.73242	0.689921	0.0571315	1	+	+	+	-	-	-	Promoter (<=1kb)	15991467	15993449	1983	1	408654	NM_001242513.1	882	GO:0003824::catalytic activity;GO:0008152::metabolic process
NC_037639.1	15999226	16000037	15999334;15999881;15999344;15999870;15999902	1506	1544	1505	895	917	677	19.0635	20.0232	21.3701	12.4634	12.4389	11.7497	5.28826	5.55449	5.92812	3.45738	3.45058	3.2594	0.722013	0.00346585	1	+	+	+	-	-	-	Promoter (2-3kb)	15993448	15996382	2935	2	408655	#NAME?	-2844	GO:0017134::fibroblast growth factor binding
NC_037639.1	15287513	15287895	15287608;15287621;15287757	540	596	460	285	355	201	6.84365	7.73712	6.54159	3.97826	4.8238	3.50066	4.0249	4.55037	3.84726	2.3397	2.83698	2.05882	0.779794	0.00517125	1	+	+	+	-	-	-	Downstream (1-2kb)	15289610	15294445	4836	2	408660	#NAME?	6550	GO:0000166::nucleotide binding;GO:0008233::peptidase activity;GO:0009372::quorum sensing;GO:0009405::pathogenesis;GO:0016021::integral component of membrane
NC_037639.1	15031847	15032513	15032014;15032325;15032020;15032346;15032031;15032327	6698	4564	3753	1565	2101	2879	84.7424	59.1624	53.2693	21.7831	28.4821	49.9104	28.6181	19.9796	17.9894	7.35632	9.61862	16.8551	0.976939	0.0667341	1	+	+	+	-	-	-	Intron (XM_026439095.1/408661, intron 1 of 8)	14966833	15039135	72303	2	408661	#NAME?	6622	GO:0003677::DNA binding;GO:0004564::beta-fructofuranosidase activity;GO:0004575::sucrose alpha-glucosidase activity;GO:0005664::nuclear origin of replication recognition complex;GO:0006260::DNA replication;GO:0006629::lipid metabolic process;GO:0009236::cobalamin biosynthetic process;GO:0016012::sarcoglycan complex;GO:0016021::integral component of membrane;GO:0046872::metal ion binding;GO:004847…
NC_037639.1	15023292	15023787	15023406;15023669;15023424;15023667;15023666	725	916	815	535	524	354	9.1839	11.8843	11.579	7.45576	7.11375	6.15215	4.17073	5.39707	5.25843	3.38592	3.2306	2.79391	0.65582	0.0276024	1	+	+	+	-	-	-	Intron (XM_026439095.1/408661, intron 1 of 8)	14966833	15039135	72303	2	408661	#NAME?	15348	GO:0003677::DNA binding;GO:0004564::beta-fructofuranosidase activity;GO:0004575::sucrose alpha-glucosidase activity;GO:0005664::nuclear origin of replication recognition complex;GO:0006260::DNA replication;GO:0006629::lipid metabolic process;GO:0009236::cobalamin biosynthetic process;GO:0016012::sarcoglycan complex;GO:0016021::integral component of membrane;GO:0046872::metal ion binding;GO:004847…
NC_037639.1	15006686	15007038	15006859;15006863;15006854	414	448	431	225	222	199	5.24975	5.81904	6.13008	3.14366	3.02165	3.466	3.34989	3.71316	3.91163	2.00598	1.92813	2.21167	0.83651	0.00323958	1	+	+	+	-	-	-	Intron (XM_026439095.1/408661, intron 1 of 8)	14966833	15039135	72303	2	408661	#NAME?	32097	GO:0003677::DNA binding;GO:0004564::beta-fructofuranosidase activity;GO:0004575::sucrose alpha-glucosidase activity;GO:0005664::nuclear origin of replication recognition complex;GO:0006260::DNA replication;GO:0006629::lipid metabolic process;GO:0009236::cobalamin biosynthetic process;GO:0016012::sarcoglycan complex;GO:0016021::integral component of membrane;GO:0046872::metal ion binding;GO:004847…
NC_037639.1	14418637	14418886	14418746;14418763;14418758	228	270	202	84	128	119	2.89685	3.51216	2.88057	1.18235	1.74795	2.0796	2.61007	3.16447	2.5954	1.0653	1.57491	1.87373	0.890832	0.0144642	1	+	+	+	-	-	-	Promoter (<=1kb)	14418153	14419864	1712	1	408663	#NAME?	484	GO:0006879::cellular iron ion homeostasis;GO:0008199::ferric iron binding;GO:0016491::oxidoreductase activity;GO:0046872::metal ion binding;GO:0055114::oxidation-reduction process
NC_037639.1	13129087	13129471	13129265;13129278;13129270	233	442	424	156	170	120	2.9601	5.74128	6.03075	2.18387	2.31705	2.09693	1.73186	3.35903	3.52839	1.27771	1.35563	1.22685	1.1589	0.108746	1	+	+	+	-	-	-	Exon (XM_006569018.3/408670, exon 20 of 28)	13122104	13237662	115559	2	408670	#NAME?	108191	GO:0003676::nucleic acid binding;GO:0003993::acid phosphatase activity;GO:0005515::protein binding;GO:0005634::nucleus;GO:0005680::anaphase-promoting complex;GO:0006355::regulation of transcription, DNA-templated;GO:0006952::defense response;GO:0008270::zinc ion binding;GO:0009236::cobalamin biosynthetic process;GO:0046872::metal ion binding;GO:0090266::regulation of mitotic cell cycle spindle as…
NC_037639.1	13138578	13139243	13138693;13139025;13138686;13139038;13139040	343	490	509	205	313	185	4.3516	6.36336	7.2369	2.86546	4.2547	3.22338	1.47177	2.15218	2.44762	0.96914	1.439	1.09019	0.795403	0.0785746	1	+	+	+	-	-	-	Exon (XM_006569018.3/408670, exon 15 of 28)	13122104	13237662	115559	2	408670	#NAME?	98419	GO:0003676::nucleic acid binding;GO:0003993::acid phosphatase activity;GO:0005515::protein binding;GO:0005634::nucleus;GO:0005680::anaphase-promoting complex;GO:0006355::regulation of transcription, DNA-templated;GO:0006952::defense response;GO:0008270::zinc ion binding;GO:0009236::cobalamin biosynthetic process;GO:0046872::metal ion binding;GO:0090266::regulation of mitotic cell cycle spindle as…
NC_037639.1	13112132	13112729	13112492;13112443;13112414	931	1052	1090	547	536	457	11.7898	13.6469	15.4813	7.62268	7.27635	7.93714	4.44091	5.14043	5.8314	2.87126	2.74081	2.98971	0.841415	0.0267499	1	+	+	+	-	-	-	3' UTR	13122104	13237662	115559	2	408670	#NAME?	124933	GO:0003676::nucleic acid binding;GO:0003993::acid phosphatase activity;GO:0005515::protein binding;GO:0005634::nucleus;GO:0005680::anaphase-promoting complex;GO:0006355::regulation of transcription, DNA-templated;GO:0006952::defense response;GO:0008270::zinc ion binding;GO:0009236::cobalamin biosynthetic process;GO:0046872::metal ion binding;GO:0090266::regulation of mitotic cell cycle spindle as…
NC_037639.1	13117106	13117698	13117211;13117554;13117234;13117556;13117524	957	593	684	491	462	261	12.1187	7.69824	9.72015	6.84372	6.27365	4.54046	4.60328	2.92417	3.6922	2.59959	2.38304	1.72469	0.74222	0.0701475	1	+	+	+	-	-	-	Distal Intergenic	13122104	13237662	115559	2	408670	#NAME?	119964	GO:0003676::nucleic acid binding;GO:0003993::acid phosphatase activity;GO:0005515::protein binding;GO:0005634::nucleus;GO:0005680::anaphase-promoting complex;GO:0006355::regulation of transcription, DNA-templated;GO:0006952::defense response;GO:0008270::zinc ion binding;GO:0009236::cobalamin biosynthetic process;GO:0046872::metal ion binding;GO:0090266::regulation of mitotic cell cycle spindle as…
NC_037639.1	14651995	14652393	14652147;14652137;14652134	833	961	1057	662	445	418	10.5501	12.4675	15.013	9.22233	6.0433	7.26127	5.95594	7.03838	8.47542	5.20636	3.41168	4.09927	0.755512	0.0361841	1	+	+	+	-	-	-	Exon (XM_006568859.3/408676, exon 2 of 13)	14648534	14679323	30790	1	408676	#NAME?	3461	GO:0008140::cAMP response element binding protein binding;GO:0051289::protein homotetramerization
NC_037639.1	12204796	12205313	12205084;12205094;12205149	1192	567	585	290	289	287	15.0915	7.36128	8.31534	4.04781	3.9295	4.99104	6.5625	3.20103	3.6159	1.76018	1.70873	2.17034	1.24644	0.132438	1	+	+	+	-	-	-	Intron (XM_026439251.1/408685, intron 1 of 16)	12199904	12295235	95332	1	408685	#NAME?	4892	GO:0000226::microtubule cytoskeleton organization;GO:0015630::microtubule cytoskeleton;GO:0016567::protein ubiquitination;GO:0016586::RSC complex;GO:0043044::ATP-dependent chromatin remodeling;GO:0090263::positive regulation of canonical Wnt signaling pathway
NC_037639.1	12210438	12210757	12210588;12210604;12210559	681	673	647	590	568	348	8.6273	8.73504	9.19512	8.22081	7.70995	6.04817	6.07283	6.14867	6.47253	5.7867	5.4271	4.25736	0.272996	0.137692	1	+	+	+	-	-	-	Intron (XM_026439251.1/408685, intron 1 of 16)	12199904	12295235	95332	1	408685	#NAME?	10534	GO:0000226::microtubule cytoskeleton organization;GO:0015630::microtubule cytoskeleton;GO:0016567::protein ubiquitination;GO:0016586::RSC complex;GO:0043044::ATP-dependent chromatin remodeling;GO:0090263::positive regulation of canonical Wnt signaling pathway
NC_037639.1	12264520	12265117	12264878;12264872;12264887	441	572	566	334	433	349	5.5913	7.42608	8.04573	4.65985	5.8807	6.0655	2.1061	2.79721	3.03062	1.75524	2.21511	2.28471	0.34301	0.174464	1	+	+	+	-	-	-	Intron (XM_026439251.1/408685, intron 1 of 16)	12254410	12295235	40826	1	408685	#NAME?	10110	GO:0000226::microtubule cytoskeleton organization;GO:0015630::microtubule cytoskeleton;GO:0016567::protein ubiquitination;GO:0016586::RSC complex;GO:0043044::ATP-dependent chromatin remodeling;GO:0090263::positive regulation of canonical Wnt signaling pathway
NC_037639.1	12189195	12189514	12189346;12189337;12189344	354	464	485	267	275	228	4.49075	6.0264	6.89634	3.72788	3.7398	3.96857	3.16108	4.24204	4.8544	2.62409	2.63248	2.79351	0.606591	0.103505	1	+	+	+	-	-	-	Intron (XM_026439251.1/408685, intron 1 of 16)	12199904	12295235	95332	1	408685	#NAME?	-10390	GO:0000226::microtubule cytoskeleton organization;GO:0015630::microtubule cytoskeleton;GO:0016567::protein ubiquitination;GO:0016586::RSC complex;GO:0043044::ATP-dependent chromatin remodeling;GO:0090263::positive regulation of canonical Wnt signaling pathway
NC_037639.1	12246637	12246991	12246754;12246775;12246743	273	431	438	187	248	200	3.4661	5.59872	6.22941	2.61508	3.37395	3.48333	2.19927	3.55244	3.95262	1.65929	2.1408	2.21021	0.691192	0.135599	1	+	+	+	-	-	-	Promoter (<=1kb)	12247378	12295235	47858	1	408685	#NAME?	-387	GO:0000226::microtubule cytoskeleton organization;GO:0015630::microtubule cytoskeleton;GO:0016567::protein ubiquitination;GO:0016586::RSC complex;GO:0043044::ATP-dependent chromatin remodeling;GO:0090263::positive regulation of canonical Wnt signaling pathway
NC_037639.1	12158806	12159450	12158886;12159191;12159183;12158949;12159283	769	707	801	572	525	384	9.7405	9.17568	11.3804	7.97043	7.1273	6.67205	3.40164	3.20439	3.97433	2.78348	2.48904	2.33005	0.476828	0.0302497	1	+	+	+	-	-	-	Promoter (1-2kb)	12157455	12295235	137781	1	408685	#NAME?	1351	GO:0000226::microtubule cytoskeleton organization;GO:0015630::microtubule cytoskeleton;GO:0016567::protein ubiquitination;GO:0016586::RSC complex;GO:0043044::ATP-dependent chromatin remodeling;GO:0090263::positive regulation of canonical Wnt signaling pathway
NC_037639.1	12201109	12201682	12201528;12201512;12201528	1043	1393	1317	759	771	785	13.2066	18.0662	18.7024	10.5716	10.4606	13.6214	5.18258	7.08959	7.33925	4.14854	4.10498	5.34535	0.528207	0.0788942	1	+	+	+	-	-	-	Promoter (1-2kb)	12199904	12295235	95332	1	408685	#NAME?	1205	GO:0000226::microtubule cytoskeleton organization;GO:0015630::microtubule cytoskeleton;GO:0016567::protein ubiquitination;GO:0016586::RSC complex;GO:0043044::ATP-dependent chromatin remodeling;GO:0090263::positive regulation of canonical Wnt signaling pathway
NC_037639.1	12216356	12216689	12216524;12216520;12216531	751	882	893	691	567	434	9.5128	11.4437	12.6859	9.62572	7.6964	7.53855	6.41547	7.71768	8.55542	6.49162	5.19048	5.08403	0.436415	0.0681263	1	+	+	+	-	-	-	Intron (XM_026439251.1/408685, intron 1 of 16)	12230351	12295235	64885	1	408685	#NAME?	-13662	GO:0000226::microtubule cytoskeleton organization;GO:0015630::microtubule cytoskeleton;GO:0016567::protein ubiquitination;GO:0016586::RSC complex;GO:0043044::ATP-dependent chromatin remodeling;GO:0090263::positive regulation of canonical Wnt signaling pathway
NC_037639.1	11340202	11340532	11340354;11340382;11340381	473	519	513	337	260	172	5.9961	6.7392	7.29366	4.70158	3.53655	2.99809	4.08044	4.58614	4.96345	3.1995	2.40668	2.04025	0.833931	0.0114429	1	+	+	+	-	-	-	Promoter (<=1kb)	11292018	11340288	48271	2	408690	#NAME?	0	GO:0004252::serine-type endopeptidase activity;GO:0005179::hormone activity;GO:0005215::transporter activity;GO:0005509::calcium ion binding;GO:0005515::protein binding;GO:0005576::extracellular region;GO:0005578::proteinaceous extracellular matrix;GO:0005672::transcription factor TFIIA complex;GO:0005789::endoplasmic reticulum membrane;GO:0005886::plasma membrane;GO:0006367::transcription initia…
NC_037639.1	10270449	10270786	10270628;10270626;10270638	567	449	387	374	235	158	7.1852	5.832	5.50572	5.21625	3.1978	2.75547	4.78838	3.88658	3.66914	3.47623	2.13109	1.83631	0.729744	0.06338	1	+	+	+	-	-	-	Intron (XM_392230.7/408694, intron 1 of 3)	10282175	10290009	7835	1	408694	#NAME?	-11389	GO:0004222::metalloendopeptidase activity;GO:0005509::calcium ion binding;GO:0005515::protein binding;GO:0006629::lipid metabolic process;GO:0008962::phosphatidylglycerophosphatase activity;GO:0045444::fat cell differentiation
NC_037639.1	10348167	10348698	10348503;10348504;10348510	699	735	887	564	350	263	8.855	9.53856	12.6007	7.85915	4.75605	4.57512	3.74924	4.03866	5.33519	3.32759	2.01373	1.93712	0.850405	0.0430286	1	+	+	+	-	-	-	Intron (XM_006565861.3/408697, intron 1 of 9)	10352818	10377206	24389	1	408697	#NAME?	-4120	GO:0005515::protein binding;GO:0019901::protein kinase binding
NC_037639.1	8518520	8518930	8518620;8518634;8518635	296	349	316	215	236	116	3.75705	4.536	4.49823	3.00456	3.21135	2.02761	2.05907	2.48598	2.46528	1.64667	1.76	1.11124	0.633828	0.0323089	1	+	+	+	-	-	-	Distal Intergenic	8658617	8660460	1844	1	408702	#NAME?	-139687	.
NC_037639.1	8669763	8670278	8669955;8669868;8669914;8670116	283	425	423	199	211	154	3.5926	5.52096	6.01656	2.782	2.8726	2.68615	1.56829	2.41008	2.62643	1.21443	1.25398	1.17259	0.859174	0.0914353	1	+	+	+	-	-	-	Distal Intergenic	8658617	8660460	1844	1	408702	#NAME?	11146	.
NC_037639.1	8461408	8461663	8461530;8461527;8461536	221	258	254	149	212	178	2.8083	3.35664	3.61845	2.0865	2.88615	3.10207	2.47098	2.95346	3.18382	1.83588	2.53948	2.72947	0.276922	0.222675	1	+	+	+	-	-	-	Distal Intergenic	8658617	8660460	1844	1	408702	#NAME?	-196954	.
NC_037639.1	8489279	8489556	8489394;8489432;8489432	222	326	310	132	199	151	2.82095	4.23792	4.41309	1.85003	2.71	2.63416	2.28569	3.4338	3.57573	1.499	2.19579	2.13434	0.673208	0.0864461	1	+	+	+	-	-	-	Distal Intergenic	8658617	8660460	1844	1	408702	#NAME?	-169061	.
NC_037639.1	8602334	8602669	8602523;8602530;8602558	220	258	236	176	200	73	2.79565	3.35664	3.36303	2.46207	2.72355	1.28242	1.87417	2.25026	2.25454	1.65055	1.82584	0.859721	0.556924	0.135528	1	+	+	+	-	-	-	Distal Intergenic	8658617	8660460	1844	1	408702	#NAME?	-55948	.
NC_037639.1	8633691	8634296	8634069;8634103;8634083	331	468	553	239	304	202	4.1998	6.07824	7.86126	3.3384	4.13275	3.51799	1.56107	2.25929	2.92204	1.24089	1.53615	1.30764	0.72304	0.146981	1	+	+	+	-	-	-	Distal Intergenic	8658617	8660460	1844	1	408702	#NAME?	-24321	.
NC_037639.1	6221506	6221919	6221744;6221749;6221757	290	470	454	164	162	151	3.68115	6.10416	6.45645	2.29515	2.20865	2.63416	2.00286	3.32118	3.51285	1.24875	1.20169	1.4332	1.18612	0.0705983	1	+	+	+	-	-	-	Intron (XM_016910960.2/408705, intron 5 of 11)	6216225	6225696	9472	2	408705	#NAME?	3777	GO:0003676::nucleic acid binding;GO:0006270::DNA replication initiation;GO:0006397::mRNA processing;GO:0006811::ion transport;GO:0016020::membrane;GO:0016021::integral component of membrane;GO:0033227::dsRNA transport;GO:0051033::RNA transmembrane transporter activity
NC_037639.1	6612281	6612533	6612414;6612419;6612420	193	236	218	136	88	111	2.4541	3.07152	3.10761	1.90567	1.20595	1.94096	2.18493	2.73463	2.76677	1.69666	1.07368	1.72807	0.77288	0.0207814	1	+	+	+	-	-	-	Promoter (2-3kb)	6612928	6614634	1707	2	408708	#NAME?	2101	.
NC_037639.1	5449573	5449811	5449689;5449691;5449681	250	219	203	181	144	144	3.17515	2.8512	2.89476	2.53162	1.96475	2.51285	2.99249	2.68718	2.72823	2.38598	1.85172	2.36829	0.347969	0.0550289	1	+	+	+	-	-	-	Intron (XM_006561080.3/408714, intron 2 of 7)	5383715	5425194	41480	2	408714	#NAME?	-24379	GO:0004222::metalloendopeptidase activity;GO:0005515::protein binding;GO:0005524::ATP binding;GO:0008270::zinc ion binding;GO:0016021::integral component of membrane
NC_037639.1	5008292	5008928	5008657;5008630;5008494	360	575	549	228	301	220	4.56665	7.46496	7.8045	3.18539	4.0921	3.82993	1.61482	2.6397	2.75977	1.12639	1.44702	1.35431	0.836605	0.0969346	1	+	+	+	-	-	-	Intron (XM_006560724.3/408715, intron 2 of 8)	4979145	5295404	316260	1	408715	#NAME?	29147	GO:0005515::protein binding
NC_037640.1	13208400	13208722	13208519;13208645;13208528;13208588	961	722	624	586	575	317	12.1693	9.37008	8.86875	8.16517	7.8048	5.51094	8.48652	6.53442	6.18481	5.69415	5.44284	3.84317	0.501402	0.090317	1	+	+	+	-	-	-	Intron (XM_026439652.1/408725, intron 3 of 22)	13093816	13224150	130335	2	408725	#NAME?	15428	GO:0000921::septin ring assembly;GO:0003723::RNA binding;GO:0003724::RNA helicase activity;GO:0003924::GTPase activity;GO:0005515::protein binding;GO:0005524::ATP binding;GO:0005525::GTP binding;GO:0005940::septin ring;GO:0016021::integral component of membrane;GO:0016887::ATPase activity
NC_037640.1	12740020	12740440	12740142;12740129;12740338;12740122;12740356	835	893	760	645	837	681	10.5754	11.5862	10.7986	8.98586	11.3549	11.8191	5.65824	6.19905	5.77766	4.80777	6.0753	6.32366	0.0354639	0.796321	1	+	+	+	-	-	-	Promoter (1-2kb)	12741992	12744749	2758	1	408726	NM_001172378.1	-1552	GO:0005576::extracellular region;GO:0006030::chitin metabolic process;GO:0008061::chitin binding
NC_037640.1	11768327	11768579	11768446;11768451;11768468	296	264	206	166	160	112	3.75705	3.4344	2.93733	2.32297	2.18155	1.95829	3.34498	3.05771	2.61516	2.06819	1.94228	1.7435	0.648227	0.0220549	1	+	+	+	-	-	-	Promoter (1-2kb)	11707475	11769791	62317	2	408733	#NAME?	1212	GO:0006464::cellular protein modification process;GO:0016151::nickel cation binding
NC_037640.1	11770921	11771167	11771032;11771046;11771045	244	244	182	122	164	134	3.09925	3.1752	2.59677	1.71093	2.23575	2.33955	2.82635	2.89561	2.36812	1.56028	2.03889	2.13355	0.496937	0.0319382	1	+	+	+	-	-	-	Promoter (1-2kb)	11709957	11769791	59835	2	408733	#NAME?	-1130	GO:0006464::cellular protein modification process;GO:0016151::nickel cation binding
NC_037640.1	11692653	11692936	11692789;11692785;11692787	432	453	547	294	304	246	5.47745	5.88384	7.77612	4.10345	4.13275	4.28051	4.34437	4.66669	6.16753	3.2546	3.27784	3.39503	0.61254	0.0885332	1	+	+	+	-	-	-	Promoter (1-2kb)	11690985	11698726	7742	1	408734	#NAME?	1668	GO:0008033::tRNA processing;GO:0016491::oxidoreductase activity;GO:0050660::flavin adenine dinucleotide binding;GO:0055114::oxidation-reduction process;GO:0071949::FAD binding
NC_037640.1	11691683	11692178	11691897;11691873;11691873	623	639	542	293	312	229	7.8936	8.2944	7.70517	4.08954	4.24115	3.9859	3.58476	3.76678	3.49919	1.8572	1.92605	1.81014	0.955995	0.000483254	1	+	+	+	-	-	-	Promoter (<=1kb)	11690985	11698726	7742	1	408734	#NAME?	698	GO:0008033::tRNA processing;GO:0016491::oxidoreductase activity;GO:0050660::flavin adenine dinucleotide binding;GO:0055114::oxidation-reduction process;GO:0071949::FAD binding
NC_037640.1	8950413	8951004	8950542;8950863;8950823;8950825	693	789	700	642	480	352	8.7791	10.2384	9.94719	8.94413	6.51755	6.11749	3.34037	3.89562	3.78482	3.40316	2.47987	2.32765	0.424656	0.08982	1	+	+	+	-	-	-	Promoter (<=1kb)	8951823	9274667	322845	1	408740	#NAME?	-819	GO:0003968::RNA-directed RNA polymerase activity;GO:0006351::transcription, DNA-templated
NC_037640.1	9082415	9082994	9082520;9082810;9082521;9082791;9082774	337	418	492	258	263	184	4.2757	5.43024	6.99567	3.60269	3.5772	3.20605	1.66053	2.10891	2.71686	1.39915	1.38925	1.24511	0.685355	0.112652	1	+	+	+	-	-	-	Exon (XM_006563995.3/408740, exon 5 of 15)	9064231	9274667	210437	1	408740	#NAME?	18184	GO:0003968::RNA-directed RNA polymerase activity;GO:0006351::transcription, DNA-templated
NC_037640.1	9087718	9088258	9087851;9088155;9087873;9088153;9087868;9088235	355	418	416	264	276	178	4.5034	5.43024	5.91723	3.68615	3.75335	3.10207	1.87504	2.26094	2.4637	1.53477	1.56275	1.29158	0.588472	0.0327881	1	+	+	+	-	-	-	Intron (XM_006563995.3/408740, intron 5 of 14)	9064231	9274667	210437	1	408740	#NAME?	23487	GO:0003968::RNA-directed RNA polymerase activity;GO:0006351::transcription, DNA-templated
NC_037640.1	9055977	9056274	9056107;9056113;9056122	276	297	212	186	222	145	3.50405	3.86208	3.02247	2.60117	3.02165	2.53018	2.64863	2.91925	2.28461	1.96616	2.28399	1.9125	0.349598	0.0718875	1	+	+	+	-	-	-	Intron (XM_006563995.3/408740, intron 2 of 14)	9064231	9274667	210437	1	408740	#NAME?	-7957	GO:0003968::RNA-directed RNA polymerase activity;GO:0006351::transcription, DNA-templated
NC_037640.1	9033898	9034210	9034002;9034048;9034043	272	326	296	204	265	144	3.45345	4.23792	4.21443	2.85155	3.6043	2.51285	2.48528	3.04983	3.03292	2.05212	2.59384	1.80838	0.408694	0.0798545	1	+	+	+	-	-	-	Intron (XM_006563995.3/408740, intron 2 of 14)	9006451	9274667	268217	1	408740	#NAME?	27447	GO:0003968::RNA-directed RNA polymerase activity;GO:0006351::transcription, DNA-templated
NC_037640.1	9059362	9059642	9059499;9059503;9059498	230	280	235	179	178	108	2.92215	3.64176	3.34884	2.5038	2.42545	1.88897	2.34241	2.91925	2.68445	2.00706	1.94425	1.51421	0.53989	0.0224955	1	+	+	+	-	-	-	Intron (XM_006563995.3/408740, intron 2 of 14)	9064231	9274667	210437	1	408740	#NAME?	-4589	GO:0003968::RNA-directed RNA polymerase activity;GO:0006351::transcription, DNA-templated
NC_037640.1	9040670	9040936	9040800;9040807;9040824	256	242	215	191	172	100	3.25105	3.14928	3.06504	2.67072	2.34415	1.75033	2.7427	2.65685	2.58578	2.25312	1.97761	1.47664	0.484526	0.0738519	1	+	+	+	-	-	-	Intron (XM_006563995.3/408740, intron 2 of 14)	9064231	9274667	210437	1	408740	#NAME?	-23295	GO:0003968::RNA-directed RNA polymerase activity;GO:0006351::transcription, DNA-templated
NC_037640.1	9022640	9023106	9022795;9022808;9022959;9022829	377	498	420	252	266	167	4.7817	6.46704	5.97399	3.51923	3.61785	2.91144	2.30639	3.11929	2.88147	1.69745	1.74502	1.40429	0.777331	0.0263963	1	+	+	+	-	-	-	Intron (XM_006563995.3/408740, intron 2 of 14)	9006451	9274667	268217	1	408740	#NAME?	16189	GO:0003968::RNA-directed RNA polymerase activity;GO:0006351::transcription, DNA-templated
NC_037640.1	8997275	8997620	8997465;8997497;8997500	294	247	262	145	184	149	3.73175	3.21408	3.73197	2.03086	2.50675	2.5995	2.42942	2.09241	2.42957	1.32212	1.63193	1.69231	0.581203	0.00874611	1	+	+	+	-	-	-	Intron (XM_006563995.3/408740, intron 2 of 14)	8988982	9274667	285686	1	408740	#NAME?	8293	GO:0003968::RNA-directed RNA polymerase activity;GO:0006351::transcription, DNA-templated
NC_037640.1	9068502	9068844	9068623;9068712;9068680	304	230	240	188	157	112	3.85825	2.99376	3.41979	2.62899	2.1409	1.95829	2.53374	1.96603	2.2458	1.72648	1.40595	1.28602	0.610401	0.022746	1	+	+	+	-	-	-	Intron (XM_006563995.3/408740, intron 2 of 14)	9064231	9274667	210437	1	408740	#NAME?	4271	GO:0003968::RNA-directed RNA polymerase activity;GO:0006351::transcription, DNA-templated
NC_037640.1	9053771	9054172	9053894;9054052;9054060	274	287	277	169	201	139	3.47875	3.73248	3.94482	2.3647	2.7371	2.4262	1.94923	2.0914	2.21038	1.325	1.53367	1.35946	0.567488	0.00263097	1	+	+	+	-	-	-	Intron (XM_006563995.3/408740, intron 2 of 14)	9064231	9274667	210437	1	408740	#NAME?	-10059	GO:0003968::RNA-directed RNA polymerase activity;GO:0006351::transcription, DNA-templated
NC_037640.1	8609962	8610321	8610175;8610171;8610179	336	377	358	225	221	191	4.26305	4.89888	5.09421	3.14366	3.0081	3.32736	2.66738	3.06521	3.18743	1.96698	1.88216	2.08192	0.588758	0.0150222	1	+	+	+	-	-	-	Intron (XM_016911227.2/408741, intron 4 of 7)	8606002	8634817	28816	1	408741	#NAME?	3960	GO:0003924::GTPase activity;GO:0004871::signal transducer activity;GO:0005524::ATP binding;GO:0005525::GTP binding;GO:0006576::cellular biogenic amine metabolic process;GO:0007186::G-protein coupled receptor signaling pathway;GO:0007264::small GTPase mediated signal transduction;GO:0015093::ferrous iron transmembrane transporter activity;GO:0015684::ferrous iron transport;GO:0016021::integral com…
NC_037640.1	8438659	8438914	8438777;8438776;8438783	244	264	218	142	191	128	3.09925	3.4344	3.10761	1.98913	2.6016	2.23557	2.72699	3.02188	2.73434	1.75021	2.28911	1.96705	0.498118	0.0164331	1	+	+	+	-	-	-	Intron (XM_016911227.2/408741, intron 2 of 7)	8401591	8634817	233227	1	408741	#NAME?	37068	GO:0003924::GTPase activity;GO:0004871::signal transducer activity;GO:0005524::ATP binding;GO:0005525::GTP binding;GO:0006576::cellular biogenic amine metabolic process;GO:0007186::G-protein coupled receptor signaling pathway;GO:0007264::small GTPase mediated signal transduction;GO:0015093::ferrous iron transmembrane transporter activity;GO:0015684::ferrous iron transport;GO:0016021::integral com…
NC_037640.1	8419200	8419660	8419506;8419496;8419502	354	482	514	207	222	139	4.49075	6.25968	7.30785	2.89328	3.02165	2.4262	2.19424	3.05856	3.57072	1.4137	1.47642	1.18547	1.11435	0.0528928	1	+	+	+	-	-	-	Intron (XM_016911227.2/408741, intron 2 of 7)	8401591	8634817	233227	1	408741	#NAME?	17609	GO:0003924::GTPase activity;GO:0004871::signal transducer activity;GO:0005524::ATP binding;GO:0005525::GTP binding;GO:0006576::cellular biogenic amine metabolic process;GO:0007186::G-protein coupled receptor signaling pathway;GO:0007264::small GTPase mediated signal transduction;GO:0015093::ferrous iron transmembrane transporter activity;GO:0015684::ferrous iron transport;GO:0016021::integral com…
NC_037640.1	8428378	8428697	8428543;8428534;8428540	947	542	451	231	351	224	11.9922	7.03728	6.41388	3.22712	4.7696	3.89925	8.44142	4.9536	4.51479	2.2716	3.35736	2.74472	1.09682	0.117116	1	+	+	+	-	-	-	Intron (XM_016911227.2/408741, intron 2 of 7)	8401591	8634817	233227	1	408741	#NAME?	26787	GO:0003924::GTPase activity;GO:0004871::signal transducer activity;GO:0005524::ATP binding;GO:0005525::GTP binding;GO:0006576::cellular biogenic amine metabolic process;GO:0007186::G-protein coupled receptor signaling pathway;GO:0007264::small GTPase mediated signal transduction;GO:0015093::ferrous iron transmembrane transporter activity;GO:0015684::ferrous iron transport;GO:0016021::integral com…
NC_037640.1	3971175	3971525	3971315;3971347;3971364	324	409	420	289	278	204	4.11125	5.3136	5.97399	4.0339	3.78045	3.55265	2.63836	3.40995	3.83375	2.58872	2.42607	2.27988	0.43797	0.125048	1	+	+	+	-	-	-	Promoter (1-2kb)	3969458	3973072	3615	2	408754	#NAME?	1547	GO:0005634::nucleus;GO:0006511::ubiquitin-dependent protein catabolic process;GO:0007275::multicellular organismal development;GO:0008270::zinc ion binding
NC_037640.1	3371523	3371946	3371683;3371769;3371817	705	701	717	349	329	620	8.9309	9.09792	10.1884	4.8685	4.4715	10.7619	4.74456	4.83329	5.41261	2.5864	2.37549	5.71728	0.489244	0.313839	1	+	+	+	-	-	-	Intron (XM_006558379.3/408758, intron 1 of 4)	3327213	3376973	49761	2	408758	#NAME?	5027	GO:0003700::sequence-specific DNA binding transcription factor activity;GO:0005739::mitochondrion;GO:0006355::regulation of transcription, DNA-templated;GO:0016788::hydrolase activity, acting on ester bonds;GO:0019031::viral envelope;GO:0019064::fusion of virus membrane with host plasma membrane;GO:0043565::sequence-specific DNA binding;GO:0046789::host cell surface receptor binding
NC_037640.1	3368035	3368319	3368175;3368177;3368228	315	375	389	208	194	220	3.9974	4.87296	5.5341	2.90719	2.64225	3.82993	3.15936	3.85136	4.3739	2.29771	2.08831	3.027	0.618953	0.0452834	1	+	+	+	-	-	-	Intron (XM_006558379.3/408758, intron 1 of 4)	3327213	3376973	49761	2	408758	#NAME?	8654	GO:0003700::sequence-specific DNA binding transcription factor activity;GO:0005739::mitochondrion;GO:0006355::regulation of transcription, DNA-templated;GO:0016788::hydrolase activity, acting on ester bonds;GO:0019031::viral envelope;GO:0019064::fusion of virus membrane with host plasma membrane;GO:0043565::sequence-specific DNA binding;GO:0046789::host cell surface receptor binding
NC_037640.1	3356337	3356671	3356501;3356488;3356495	505	620	693	349	390	511	6.4009	8.04816	9.84786	4.8685	5.29805	8.87296	4.30391	5.41151	6.62161	3.27353	3.56236	5.9661	0.351777	0.341581	1	+	+	+	-	-	-	Exon (XM_006558379.3/408758, exon 2 of 5)	3327213	3376973	49761	2	408758	#NAME?	20302	GO:0003700::sequence-specific DNA binding transcription factor activity;GO:0005739::mitochondrion;GO:0006355::regulation of transcription, DNA-templated;GO:0016788::hydrolase activity, acting on ester bonds;GO:0019031::viral envelope;GO:0019064::fusion of virus membrane with host plasma membrane;GO:0043565::sequence-specific DNA binding;GO:0046789::host cell surface receptor binding
NC_037640.1	3459467	3460318	3459634;3459943;3459588;3459972;3459988	3425	1740	1122	577	375	336	43.3389	22.5634	15.9354	8.03998	5.0948	5.84021	11.4579	5.96529	4.21298	2.1256	1.34696	1.54403	2.10867	0.124831	1	+	+	+	-	-	-	Intron (XM_006558376.3/408758, intron 1 of 7)	3327213	3463938	136726	2	408758	#NAME?	3620	GO:0003700::sequence-specific DNA binding transcription factor activity;GO:0005739::mitochondrion;GO:0006355::regulation of transcription, DNA-templated;GO:0016788::hydrolase activity, acting on ester bonds;GO:0019031::viral envelope;GO:0019064::fusion of virus membrane with host plasma membrane;GO:0043565::sequence-specific DNA binding;GO:0046789::host cell surface receptor binding
NC_037640.1	3079289	3079702	3079527;3079532;3079549	886	570	484	219	235	167	11.2205	7.40016	6.88215	3.0602	3.1978	2.91144	6.1049	4.02631	3.74447	1.66501	1.73987	1.58407	1.47575	0.0572242	1	+	+	+	-	-	-	Promoter (1-2kb)	3081076	3115462	34387	1	408759	#NAME?	-1374	GO:0016533::cyclin-dependent protein kinase 5 holoenzyme complex;GO:0016534::cyclin-dependent protein kinase 5 activator activity
NC_037640.1	3077484	3077962	3077613;3077840;3077818;3077890	341	332	381	237	255	180	4.3263	4.31568	5.42058	3.31058	3.4688	3.13673	2.03445	2.02946	2.54904	1.55681	1.63121	1.47505	0.504013	0.0556001	1	+	+	+	-	-	-	Intron (XM_016911332.2/408759, intron 2 of 9)	3081076	3115462	34387	1	408759	#NAME?	-3114	GO:0016533::cyclin-dependent protein kinase 5 holoenzyme complex;GO:0016534::cyclin-dependent protein kinase 5 activator activity
NC_037640.1	3092485	3092827	3092636;3092664;3092666	492	411	306	143	195	101	6.23645	5.33952	4.35633	2.00304	2.6558	1.76766	4.09553	3.50651	2.86084	1.31541	1.74409	1.16084	1.30985	0.014632	1	+	+	+	-	-	-	Intron (XM_016911332.2/408759, intron 2 of 9)	3081076	3115462	34387	1	408759	#NAME?	11409	GO:0016533::cyclin-dependent protein kinase 5 holoenzyme complex;GO:0016534::cyclin-dependent protein kinase 5 activator activity
NC_037640.1	2542747	2543009	2542887;2542868;2542919	213	256	187	167	121	114	2.7071	3.33072	2.66772	2.33688	1.6531	1.99295	2.31854	2.85265	2.28481	2.00146	1.41583	1.7069	0.541082	0.036165	1	+	+	+	-	-	-	Intron (XM_006557974.3/408763, intron 8 of 8)	2546251	2602840	56590	2	408763	#NAME?	59831	GO:0003677::DNA binding;GO:0003700::sequence-specific DNA binding transcription factor activity;GO:0004252::serine-type endopeptidase activity;GO:0005634::nucleus;GO:0005886::plasma membrane;GO:0006355::regulation of transcription, DNA-templated;GO:0007165::signal transduction;GO:0016237::microautophagy;GO:0016579::protein deubiquitination;GO:0034448::EGO complex;GO:0036459::ubiquitinyl hydrolase…
NC_037640.1	2524567	2525451	2524773;2525030;2524847;2524825;2525008	449	763	865	305	364	291	5.6925	9.90144	12.2885	4.25646	4.94575	5.06036	1.44886	2.52012	3.12768	1.08336	1.2588	1.28797	0.967123	0.140527	1	+	+	+	-	-	-	3' UTR	2477092	2526970	49879	1	408764	#NAME?	47475	GO:0004252::serine-type endopeptidase activity;GO:0005216::ion channel activity;GO:0005509::calcium ion binding;GO:0005739::mitochondrion;GO:0005886::plasma membrane;GO:0006811::ion transport;GO:0008565::protein transporter activity;GO:0009523::photosystem II;GO:0009539::photosystem II reaction center;GO:0015031::protein transport;GO:0015979::photosynthesis;GO:0016020::membrane;GO:0016021::integr…
NC_037641.1	13264674	13265096	13264862;13264892;13264924	528	573	523	438	360	225	6.69185	7.43904	7.43556	6.10649	4.89155	3.91658	3.56346	3.96135	3.9595	3.25175	2.60479	2.08561	0.532061	0.0577281	1	+	+	+	-	-	-	Promoter (<=1kb)	13208748	13265940	57193	2	408767	#NAME?	844	GO:0005509::calcium ion binding;GO:0006629::lipid metabolic process;GO:0007156::homophilic cell adhesion via plasma membrane adhesion molecules;GO:0016020::membrane
NC_037641.1	13376178	13376489	13376285;13376312;13376324	260	274	348	201	207	195	3.30165	3.564	4.95231	2.80982	2.8184	3.39668	2.38365	2.57306	3.57536	2.02857	2.03477	2.45226	0.388998	0.20302	1	+	+	+	-	-	-	Intron (XM_026440137.1/408767, intron 1 of 16)	13208748	13383986	175239	2	408767	#NAME?	7497	GO:0005509::calcium ion binding;GO:0006629::lipid metabolic process;GO:0007156::homophilic cell adhesion via plasma membrane adhesion molecules;GO:0016020::membrane
NC_037641.1	13286417	13287247	13286546;13286613;13287001;13287074;13287063	426	505	568	299	337	232	5.40155	6.55776	8.07411	4.173	4.5799	4.03789	1.46414	1.77755	2.18857	1.13113	1.24143	1.09451	0.647303	0.0833814	1	+	+	+	-	-	-	Intron (XM_026440137.1/408767, intron 1 of 16)	13208748	13274500	65753	2	408767	#NAME?	-11917	GO:0005509::calcium ion binding;GO:0006629::lipid metabolic process;GO:0007156::homophilic cell adhesion via plasma membrane adhesion molecules;GO:0016020::membrane
NC_037641.1	13349106	13349601	13349175;13349432;13349464;13349497	302	460	400	183	279	304	3.83295	5.97456	5.69019	2.55944	3.794	5.28565	1.74068	2.71326	2.58411	1.16233	1.72299	2.4004	0.413076	0.283601	1	+	+	+	-	-	-	Intron (XM_026440137.1/408767, intron 1 of 16)	13208748	13383986	175239	2	408767	#NAME?	34385	GO:0005509::calcium ion binding;GO:0006629::lipid metabolic process;GO:0007156::homophilic cell adhesion via plasma membrane adhesion molecules;GO:0016020::membrane
NC_037641.1	13329487	13329773	13329615;13329587;13329625	301	344	293	310	325	119	3.8203	4.4712	4.17186	4.32601	4.4173	2.0796	2.99835	3.5092	3.27427	3.39525	3.4669	1.63217	0.203605	0.552323	1	+	+	+	-	-	-	Intron (XM_026440137.1/408767, intron 1 of 16)	13208748	13383986	175239	2	408767	#NAME?	54213	GO:0005509::calcium ion binding;GO:0006629::lipid metabolic process;GO:0007156::homophilic cell adhesion via plasma membrane adhesion molecules;GO:0016020::membrane
NC_037641.1	13313598	13313956	13313720;13313762;13313798	247	339	324	198	212	192	3.1372	4.4064	4.61175	2.76809	2.88615	3.34469	1.9684	2.76475	2.8936	1.73681	1.81089	2.09859	0.433766	0.137783	1	+	+	+	-	-	-	Intron (XM_026440137.1/408767, intron 1 of 16)	13208748	13274500	65753	2	408767	#NAME?	-39098	GO:0005509::calcium ion binding;GO:0006629::lipid metabolic process;GO:0007156::homophilic cell adhesion via plasma membrane adhesion molecules;GO:0016020::membrane
NC_037641.1	13080217	13080703	13080334;13080562;13080526	484	462	496	602	515	324	6.13525	6.00048	7.05243	8.38773	6.9918	5.63225	2.83772	2.77539	3.26194	3.87956	3.2339	2.60507	-0.130982	0.536932	1	+	+	+	-	-	-	Intron (XM_026440467.1/408770, intron 1 of 17)	13021636	13068351	46716	2	408770	#NAME?	-11866	GO:0003993::acid phosphatase activity;GO:0004867::serine-type endopeptidase inhibitor activity;GO:0005515::protein binding;GO:0005783::endoplasmic reticulum;GO:0016020::membrane;GO:0019069::viral capsid assembly;GO:0042025::host cell nucleus;GO:0046872::metal ion binding
NC_037641.1	13057062	13057760	13057306;13057635;13057330;13057655;13057312	437	579	644	287	276	172	5.5407	7.5168	9.15255	4.00608	3.75335	2.99809	1.78548	2.42227	2.94938	1.29095	1.20951	0.966126	1.04587	0.0576782	1	+	+	+	-	-	-	5' UTR	13021636	13051257	29622	2	408770	#NAME?	-5805	GO:0003993::acid phosphatase activity;GO:0004867::serine-type endopeptidase inhibitor activity;GO:0005515::protein binding;GO:0005783::endoplasmic reticulum;GO:0016020::membrane;GO:0019069::viral capsid assembly;GO:0042025::host cell nucleus;GO:0046872::metal ion binding
NC_037641.1	13090474	13090923	13090655;13090606;13090778	331	268	254	177	239	104	4.1998	3.48624	3.61845	2.47598	3.252	1.81965	2.10224	1.74506	1.81124	1.23937	1.62781	0.910839	0.5828	0.0744149	1	+	+	+	-	-	-	Intron (XM_026440467.1/408770, intron 1 of 17)	13021636	13068351	46716	2	408770	#NAME?	-22123	GO:0003993::acid phosphatase activity;GO:0004867::serine-type endopeptidase inhibitor activity;GO:0005515::protein binding;GO:0005783::endoplasmic reticulum;GO:0016020::membrane;GO:0019069::viral capsid assembly;GO:0042025::host cell nucleus;GO:0046872::metal ion binding
NC_037641.1	13050998	13051373	13051200;13051201;13051192	332	315	386	177	176	132	4.21245	4.09536	5.49153	2.47598	2.39835	2.30489	2.52356	2.45341	3.28982	1.48329	1.43678	1.38079	0.9427	0.0372814	1	+	+	+	-	-	-	Promoter (<=1kb)	13021636	13051229	29594	2	408770	#NAME?	0	GO:0003993::acid phosphatase activity;GO:0004867::serine-type endopeptidase inhibitor activity;GO:0005515::protein binding;GO:0005783::endoplasmic reticulum;GO:0016020::membrane;GO:0019069::viral capsid assembly;GO:0042025::host cell nucleus;GO:0046872::metal ion binding
NC_037641.1	13129616	13130084	13129913;13129916;13129876	345	427	519	338	246	132	4.3769	5.54688	7.3788	4.71549	3.34685	2.30489	2.10213	2.66405	3.54388	2.26475	1.60742	1.10699	0.738957	0.110933	1	+	+	+	-	-	-	Promoter (<=1kb)	13021636	13130470	108835	2	408770	#NAME?	386	GO:0003993::acid phosphatase activity;GO:0004867::serine-type endopeptidase inhibitor activity;GO:0005515::protein binding;GO:0005783::endoplasmic reticulum;GO:0016020::membrane;GO:0019069::viral capsid assembly;GO:0042025::host cell nucleus;GO:0046872::metal ion binding
NC_037641.1	12643616	12643998	12643811;12643811;12643807	550	695	758	340	242	217	6.97015	9.02016	10.7702	4.74331	3.29265	3.77794	4.0993	5.30496	6.3342	2.78965	1.93648	2.22189	1.17962	0.0321972	1	+	+	+	-	-	-	Promoter (1-2kb)	12624278	12645701	21424	2	408775	#NAME?	1703	GO:0003676::nucleic acid binding;GO:0003723::RNA binding;GO:0004535::poly(A)-specific ribonuclease activity;GO:0005634::nucleus;GO:0005737::cytoplasm;GO:0006402::mRNA catabolic process;GO:0046872::metal ion binding
NC_037641.1	12642808	12643194	12643027;12642871;12642985;12643005	420	509	584	293	207	260	5.32565	6.6096	8.30115	4.08954	2.8184	4.52313	3.09976	3.84708	4.83163	2.38029	1.64043	2.63266	0.823992	0.0552389	1	+	+	+	-	-	-	Promoter (2-3kb)	12624278	12645701	21424	2	408775	#NAME?	2507	GO:0003676::nucleic acid binding;GO:0003723::RNA binding;GO:0004535::poly(A)-specific ribonuclease activity;GO:0005634::nucleus;GO:0005737::cytoplasm;GO:0006402::mRNA catabolic process;GO:0046872::metal ion binding
NC_037641.1	12217923	12218724	12218264;12218277;12218271	1860	2118	2287	1106	767	877	23.5417	27.4622	32.4667	15.3984	10.4064	15.2157	6.61196	7.71307	9.11864	4.32482	2.92276	4.2735	1.02492	0.014527	1	+	+	+	-	-	-	Exon (XM_016911620.2/408779, exon 15 of 39)	12221742	12262534	40793	1	408779	#NAME?	-3018	GO:0005509::calcium ion binding;GO:0005515::protein binding;GO:0005856::cytoskeleton;GO:0006952::defense response;GO:0007050::cell cycle arrest;GO:0016020::membrane;GO:0016021::integral component of membrane;GO:0042765::GPI-anchor transamidase complex
NC_037641.1	12137704	12138004	12137860;12137871;12137867	416	514	462	338	246	243	5.27505	6.6744	6.56997	4.71549	3.34685	4.22852	3.94754	4.99473	4.91658	3.5288	2.50459	3.16438	0.591453	0.0267091	1	+	+	+	-	-	-	Promoter (<=1kb)	12108411	12136721	28311	2	408780	#NAME?	-983	GO:0000917::barrier septum assembly;GO:0005096::GTPase activator activity;GO:0005515::protein binding;GO:0005737::cytoplasm;GO:0043093::FtsZ-dependent cytokinesis;GO:0051056::regulation of small GTPase mediated signal transduction
NC_037641.1	12134771	12135018	12134866;12134883;12134903	458	433	419	399	349	254	5.80635	5.62464	5.9598	5.564	4.7425	4.41915	5.27373	5.10869	5.41311	5.05361	4.30747	4.01378	0.239992	0.111707	1	+	+	+	-	-	-	Promoter (1-2kb)	12108411	12136720	28310	2	408780	#NAME?	1702	GO:0000917::barrier septum assembly;GO:0005096::GTPase activator activity;GO:0005515::protein binding;GO:0005737::cytoplasm;GO:0043093::FtsZ-dependent cytokinesis;GO:0051056::regulation of small GTPase mediated signal transduction
NC_037641.1	11703454	11704269	11703586;11704057;11703567;11703807;11704113;11704099	457	631	699	273	343	228	5.7937	8.19072	9.933	3.81134	4.6612	3.96857	1.59931	2.26099	2.74193	1.05209	1.28669	1.09549	0.942947	0.079731	1	+	+	+	-	-	-	Intron (XM_006567200.3/408787, intron 5 of 9)	11649231	11742488	93258	2	408787	#NAME?	38219	GO:0005515::protein binding;GO:0042802::identical protein binding
NC_037641.1	11711826	11712800	11712016;11712550;11712018;11712529;11712464	459	893	1001	275	383	198	5.819	11.5862	14.2184	3.83916	5.2032	3.44867	1.34434	2.67672	3.28483	0.886948	1.20208	0.796734	1.34011	0.117987	1	+	+	+	-	-	-	Exon (XM_006567200.3/408787, exon 4 of 10)	11649231	11742488	93258	2	408787	#NAME?	29688	GO:0005515::protein binding;GO:0042802::identical protein binding
NC_037641.1	11692201	11692715	11692384;11692347;11692357	331	426	484	181	194	172	4.1998	5.53392	6.88215	2.53162	2.64225	2.99809	1.83691	2.42043	3.01012	1.10728	1.15567	1.31131	1.02381	0.0637232	1	+	+	+	-	-	-	Intron (XM_006567200.3/408787, intron 5 of 9)	11649231	11742488	93258	2	408787	#NAME?	49773	GO:0005515::protein binding;GO:0042802::identical protein binding
NC_037641.1	11601369	11601790	11601644;11601624;11601621	651	625	650	409	328	177	8.2478	8.11296	9.23769	5.7031	4.45795	3.08474	4.40243	4.33045	4.9308	3.04414	2.37952	1.64654	0.950523	0.0181899	1	+	+	+	-	-	-	Intron (XM_392319.7/408788, intron 1 of 2)	11596122	11618885	22764	1	408788	#NAME?	5247	GO:0003689::DNA clamp loader activity;GO:0005524::ATP binding;GO:0005663::DNA replication factor C complex;GO:0006260::DNA replication;GO:0008152::metabolic process;GO:0016021::integral component of membrane;GO:0016758::transferase activity, transferring hexosyl groups;GO:0032266::phosphatidylinositol-3-phosphate binding;GO:0043130::ubiquitin binding
NC_037641.1	11620935	11621753	11621251;11621361;11621210;11621405	1486	1377	956	575	685	302	18.8105	17.8589	13.5798	8.01216	9.2953	5.25099	5.17348	4.91176	3.73487	2.2036	2.5565	1.44419	1.15543	0.0120475	1	+	+	+	-	-	-	Distal Intergenic	11596122	11618885	22764	1	408788	#NAME?	24813	GO:0003689::DNA clamp loader activity;GO:0005524::ATP binding;GO:0005663::DNA replication factor C complex;GO:0006260::DNA replication;GO:0008152::metabolic process;GO:0016021::integral component of membrane;GO:0016758::transferase activity, transferring hexosyl groups;GO:0032266::phosphatidylinositol-3-phosphate binding;GO:0043130::ubiquitin binding
NC_037641.1	11613642	11614023	11613842;11613871;11613871	1326	695	645	641	557	255	16.7865	9.02016	9.16674	8.93022	7.5609	4.43648	9.89836	5.31885	5.40528	5.26581	4.45838	2.61602	0.740851	0.203454	1	+	+	+	-	-	-	Intron (XM_392319.7/408788, intron 2 of 2)	11596122	11618885	22764	1	408788	#NAME?	17520	GO:0003689::DNA clamp loader activity;GO:0005524::ATP binding;GO:0005663::DNA replication factor C complex;GO:0006260::DNA replication;GO:0008152::metabolic process;GO:0016021::integral component of membrane;GO:0016758::transferase activity, transferring hexosyl groups;GO:0032266::phosphatidylinositol-3-phosphate binding;GO:0043130::ubiquitin binding
NC_037641.1	11604733	11605033	11604888;11604907;11604928	362	404	398	215	250	156	4.59195	5.2488	5.66181	3.00456	3.40105	2.72081	3.43635	3.9279	4.23697	2.24844	2.54515	2.0361	0.764386	0.00740635	1	+	+	+	-	-	-	Intron (XM_392319.7/408788, intron 2 of 2)	11596122	11618885	22764	1	408788	#NAME?	8611	GO:0003689::DNA clamp loader activity;GO:0005524::ATP binding;GO:0005663::DNA replication factor C complex;GO:0006260::DNA replication;GO:0008152::metabolic process;GO:0016021::integral component of membrane;GO:0016758::transferase activity, transferring hexosyl groups;GO:0032266::phosphatidylinositol-3-phosphate binding;GO:0043130::ubiquitin binding
NC_037641.1	11165903	11166368	11166074;11166105;11166117;11166311	611	779	888	483	301	288	7.7418	10.1088	12.6149	6.73244	4.0921	5.00837	3.74216	4.8863	6.09768	3.25427	1.978	2.4209	0.94425	0.0534496	1	+	+	+	-	-	-	Promoter (2-3kb)	11145328	11168624	23297	2	408793	#NAME?	2256	GO:0003676::nucleic acid binding;GO:0003700::sequence-specific DNA binding transcription factor activity;GO:0005634::nucleus;GO:0006355::regulation of transcription, DNA-templated;GO:0008080::N-acetyltransferase activity;GO:0008270::zinc ion binding;GO:0016747::transferase activity, transferring acyl groups other than amino-acyl groups
NC_037641.1	10790810	10791391	10790960;10790958;10790965;10791283;10791329	432	642	582	394	462	270	5.47745	8.33328	8.27277	5.49445	6.27365	4.69643	2.11993	3.22522	3.2018	2.12651	2.42808	1.81765	0.423608	0.17498	1	+	+	+	-	-	-	Exon (XM_026440227.1/408797, exon 3 of 22)	10783518	10798201	14684	2	408797	#NAME?	6810	GO:0005509::calcium ion binding;GO:0005515::protein binding;GO:0007160::cell-matrix adhesion
NC_037641.1	9671665	9672117	9671761;9671792;9671993	370	368	385	341	309	173	4.69315	4.78224	5.47734	4.75722	4.2005	3.01542	2.33363	2.37793	2.72357	2.36549	2.08867	1.4994	0.320607	0.183633	1	+	+	+	-	-	-	Intron (XM_026440434.1/408801, intron 3 of 9)	9613735	9644874	31140	2	408801	#NAME?	-26791	.
NC_037641.1	9680950	9681518	9681051;9681370;9681206;9681290;9681159	334	399	444	213	226	179	4.23775	5.184	6.31455	2.97674	3.07585	3.1194	1.6776	2.0522	2.49975	1.17841	1.21764	1.23488	0.77879	0.0670173	1	+	+	+	-	-	-	Intron (XM_026440434.1/408801, intron 3 of 9)	9613735	9644874	31140	2	408801	#NAME?	-36076	.
NC_037641.1	9682651	9683301	9682759;9683085;9683068;9683069	401	565	600	273	249	214	5.0853	7.33536	8.52819	3.81134	3.3875	3.72595	1.75955	2.53809	2.95082	1.31875	1.1721	1.28921	0.939265	0.0780975	1	+	+	+	-	-	-	Intron (XM_026440434.1/408801, intron 3 of 9)	9613735	9644874	31140	2	408801	#NAME?	-37777	.
NC_037641.1	9691338	9691860	9691673;9691669;9691705	346	407	417	231	218	119	4.38955	5.28768	5.93142	3.22712	2.96745	2.0796	1.89054	2.27735	2.5546	1.38989	1.27805	0.895663	0.915659	0.0141786	1	+	+	+	-	-	-	Intron (XM_026440434.1/408801, intron 3 of 9)	9613735	9644874	31140	2	408801	#NAME?	-46464	.
NC_037641.1	9699741	9700240	9700050;9699976;9699970	307	406	454	202	214	155	3.8962	5.27472	6.45645	2.82373	2.91325	2.70348	1.75524	2.37627	2.90864	1.2721	1.31242	1.21792	0.888681	0.0826094	1	+	+	+	-	-	-	Intron (XM_026440434.1/408801, intron 3 of 9)	9613735	9644874	31140	2	408801	#NAME?	-54867	.
NC_037641.1	9755105	9755499	9755292;9755301;9755311	283	347	401	231	193	149	3.5926	4.51008	5.70438	3.22712	2.6287	2.5995	2.0487	2.5719	3.25295	1.84028	1.49903	1.48238	0.707475	0.0878592	1	+	+	+	-	-	-	Intron (XM_026440434.1/408801, intron 2 of 9)	9613735	9840315	226581	2	408801	#NAME?	84816	.
NC_037641.1	9817235	9817521	9817348;9817372;9817367	285	311	336	265	236	137	3.6179	4.04352	4.78203	3.70006	3.21135	2.39154	2.8395	3.17354	3.75316	2.90398	2.52042	1.87699	0.419626	0.11092	1	+	+	+	-	-	-	Intron (XM_026440434.1/408801, intron 1 of 9)	9613735	9840315	226581	2	408801	#NAME?	22794	.
NC_037641.1	9821374	9821759	9821592;9821586;9821614	410	411	482	311	248	178	5.19915	5.33952	6.85377	4.33992	3.37395	3.10207	3.03397	3.11588	3.99953	2.53257	1.96887	1.81022	0.685301	0.0327121	1	+	+	+	-	-	-	Intron (XM_026440434.1/408801, intron 1 of 9)	9613735	9840315	226581	2	408801	#NAME?	18556	.
NC_037641.1	9860488	9860779	9860599;9860634;9860636	303	304	295	176	181	151	3.8456	3.9528	4.20024	2.46207	2.4661	2.63416	2.96652	3.04922	3.2401	1.89926	1.90237	2.03201	0.665968	0.0010033	1	+	+	+	-	-	-	Intron (XM_016911649.2/408801, intron 1 of 9)	9613735	9840315	226581	2	408801	#NAME?	-20173	.
NC_037641.1	9885959	9886384	9886241;9886247;9886239	806	776	942	358	377	379	10.2086	10.0699	13.3812	4.99369	5.1219	6.5854	5.39788	5.32454	7.07542	2.64045	2.70825	3.48208	1.01109	0.0201233	1	+	+	+	-	-	-	Intron (XM_016911649.2/408801, intron 1 of 9)	9613735	9923720	309986	2	408801	#NAME?	37336	.
NC_037641.1	9895293	9895673	9895505;9895508;9895534	323	419	511	218	185	179	4.0986	5.4432	7.26528	3.04629	2.5203	3.1194	2.42313	3.21807	4.2953	1.801	1.49003	1.84422	0.952307	0.0926707	1	+	+	+	-	-	-	Intron (XM_016911649.2/408801, intron 1 of 9)	9613735	9923720	309986	2	408801	#NAME?	28047	.
NC_037641.1	9870901	9871240	9871045;9871079;9871068	324	373	519	208	183	121	4.11125	4.84704	7.3788	2.90719	2.4932	2.11426	2.72371	3.21118	4.88847	1.92602	1.65175	1.4007	1.12037	0.0901692	1	+	+	+	-	-	-	Intron (XM_016911649.2/408801, intron 1 of 9)	9613735	9840315	226581	2	408801	#NAME?	-30586	.
NC_037641.1	9913911	9914195	9914064;9914052;9914067	689	548	435	229	324	340	8.7285	7.11504	6.18684	3.1993	4.40375	5.90953	6.8986	5.6234	4.88979	2.52858	3.48052	4.67062	0.705191	0.0583983	1	+	+	+	-	-	-	Intron (XM_016911649.2/408801, intron 1 of 9)	9613735	9923720	309986	2	408801	#NAME?	9525	.
NC_037641.1	9654352	9654689	9654532;9654554;9654554	260	328	323	187	197	171	3.30165	4.26384	4.59756	2.61508	2.6829	2.98076	2.20029	2.84152	3.06392	1.74275	1.78795	1.98645	0.555022	0.069583	1	+	+	+	-	-	-	Intron (XM_026440434.1/408801, intron 3 of 9)	9613735	9644874	31140	2	408801	#NAME?	-9478	.
NC_037641.1	9720810	9721374	9720990;9721047;9721066	408	471	516	239	260	211	5.17385	6.11712	7.33623	3.3384	3.53655	3.67396	2.06268	2.43874	2.92477	1.33093	1.40993	1.46471	0.820317	0.0470278	1	+	+	+	-	-	-	Intron (XM_026440434.1/408801, intron 2 of 9)	9613735	9644874	31140	2	408801	#NAME?	-75936	.
NC_037641.1	9732449	9733131	9732772;9732845;9732816	374	551	630	288	239	200	4.74375	7.15392	8.95389	4.01999	3.252	3.48333	1.56447	2.35934	2.95296	1.32578	1.0725	1.14879	0.955105	0.105428	1	+	+	+	-	-	-	Intron (XM_026440434.1/408801, intron 2 of 9)	9613735	9644874	31140	2	408801	#NAME?	-87575	.
NC_037641.1	9637551	9637817	9637657;9637668;9637695	282	372	379	203	229	143	3.57995	4.83408	5.3922	2.83764	3.1165	2.49552	3.02018	4.07821	4.54906	2.39394	2.62919	2.10531	0.708354	0.0671554	1	+	+	+	-	-	-	Intron (XM_006565424.3/408801, intron 2 of 7)	9613735	9644874	31140	2	408801	#NAME?	7057	.
NC_037641.1	9786881	9787238	9787041;9787076;9787075	498	454	435	221	291	221	6.31235	5.8968	6.18684	3.08802	3.9566	3.84726	3.97168	3.71022	3.89271	1.94296	2.48946	2.42067	0.756138	0.00476447	1	+	+	+	-	-	-	Intron (XM_026440434.1/408801, intron 2 of 9)	9613735	9840315	226581	2	408801	#NAME?	53077	.
NC_037641.1	9716812	9717117	9717006;9717004;9716959	310	333	357	183	243	204	3.93415	4.32864	5.08002	2.55944	3.3062	3.55265	2.89598	3.18637	3.73947	1.88404	2.43374	2.61516	0.502525	0.0444222	1	+	+	+	-	-	-	Intron (XM_026440434.1/408801, intron 3 of 9)	9613735	9644874	31140	2	408801	#NAME?	-71938	.
NC_037641.1	9312510	9313406	9312799;9313172;9312790;9313183;9313150	459	623	687	443	365	254	5.819	8.08704	9.76272	6.17604	4.9593	4.41915	1.46124	2.03078	2.45157	1.5509	1.24536	1.10972	0.605653	0.126829	1	+	+	+	-	-	-	Exon (XM_026440246.1/411023, exon 39 of 39)	9061799	9309120	247322	2	408803	#NAME?	-3390	.
NC_037641.1	9356282	9356722	9356543;9356523;9356513	276	328	301	214	163	143	3.50405	4.26384	4.28538	2.99065	2.2222	2.49552	1.78977	2.17785	2.18886	1.52754	1.13504	1.27464	0.644927	0.0137455	1	+	+	+	-	-	-	Intron (XM_006565432.3/550811, intron 15 of 27)	9061799	9309120	247322	2	408803	#NAME?	-47162	.
NC_037641.1	8527915	8528192	8528033;8528040;8528058	573	478	382	342	342	282	7.2611	6.20784	5.43477	4.77113	4.64765	4.90439	5.88334	5.02993	4.40355	3.86583	3.76578	3.97381	0.400319	0.0993461	1	+	+	+	-	-	-	Promoter (1-2kb)	8519205	8526427	7223	2	408805	#NAME?	-1488	GO:0016021::integral component of membrane
NC_037641.1	8221841	8222896	8222000;8222351;8222683;8222034;8222733;8222023	473	762	791	372	398	207	5.9961	9.88848	11.2385	5.18843	5.40645	3.60464	1.279	2.10927	2.39724	1.10672	1.15323	0.76889	0.933679	0.0979735	1	+	+	+	-	-	-	Intron (XR_003304541.1/113218549, intron 2 of 2)	8204758	8206134	1377	1	408807	#NAME?	17083	GO:0005515::protein binding;GO:0007165::signal transduction
NC_037641.1	8220615	8221071	8220849;8220847;8220875	255	451	429	190	229	103	3.2384	5.85792	6.1017	2.65681	3.1165	1.80232	1.59618	2.88731	3.00747	1.30952	1.53609	0.888346	1.00445	0.0932999	1	+	+	+	-	-	-	Intron (XR_003304541.1/113218549, intron 2 of 2)	8204758	8206134	1377	1	408807	#NAME?	15857	GO:0005515::protein binding;GO:0007165::signal transduction
NC_037641.1	8147319	8147867	8147761;8147664;8147751	291	531	521	234	235	184	3.6938	6.89472	7.40718	3.26885	3.1978	3.20605	1.51554	2.82886	3.03911	1.34119	1.31204	1.31542	0.895662	0.139526	1	+	+	+	-	-	-	Distal Intergenic	8134601	8140325	5725	1	408808	#NAME?	12718	GO:0004674::protein serine/threonine kinase activity;GO:0006629::lipid metabolic process
NC_037641.1	8150621	8151387	8150793;8151137;8150786;8151136;8151160	433	766	798	230	263	221	5.4901	9.94032	11.3378	3.21321	3.5772	3.84726	1.61232	2.91925	3.32966	0.943648	1.05054	1.12985	1.33134	0.0912382	1	+	+	+	-	-	-	Distal Intergenic	8134601	8140325	5725	1	408808	#NAME?	16020	GO:0004674::protein serine/threonine kinase activity;GO:0006629::lipid metabolic process
NC_037641.1	6917019	6917329	6917184;6917182;6917190	262	336	307	154	163	106	3.32695	4.36752	4.37052	2.15605	2.2222	1.85431	2.40964	3.1633	3.16548	1.56158	1.60949	1.34304	0.95293	0.0218849	1	+	+	+	-	-	-	Intron (XM_016911575.2/408810, intron 4 of 21)	6952645	6977717	25073	1	408810	#NAME?	-35316	GO:0004252::serine-type endopeptidase activity;GO:0005085::guanyl-nucleotide exchange factor activity;GO:0005515::protein binding;GO:0005886::plasma membrane;GO:0007165::signal transduction;GO:0007264::small GTPase mediated signal transduction;GO:0008233::peptidase activity;GO:0008948::oxaloacetate decarboxylase activity;GO:0009372::quorum sensing;GO:0009405::pathogenesis;GO:0015081::sodium ion t…
NC_037641.1	6851476	6851983	6851726;6851686;6851756	293	338	354	172	185	136	3.7191	4.39344	5.03745	2.40643	2.5203	2.37421	1.64908	1.94808	2.23364	1.06703	1.11752	1.05274	0.848908	0.0345479	1	+	+	+	-	-	-	Intron (XM_016911575.2/408810, intron 4 of 21)	6840769	6977717	136949	1	408810	#NAME?	10707	GO:0004252::serine-type endopeptidase activity;GO:0005085::guanyl-nucleotide exchange factor activity;GO:0005515::protein binding;GO:0005886::plasma membrane;GO:0007165::signal transduction;GO:0007264::small GTPase mediated signal transduction;GO:0008233::peptidase activity;GO:0008948::oxaloacetate decarboxylase activity;GO:0009372::quorum sensing;GO:0009405::pathogenesis;GO:0015081::sodium ion t…
NC_037641.1	6790870	6791269	6791051;6791040;6791031	548	574	538	400	442	303	6.94485	7.452	7.64841	5.57791	6.00265	5.26832	3.91083	4.19642	4.30703	3.14107	3.38026	2.96673	0.387816	0.00440233	1	+	+	+	-	-	-	Intron (XM_016911575.2/408810, intron 1 of 21)	6787813	6977717	189905	1	408810	#NAME?	3057	GO:0004252::serine-type endopeptidase activity;GO:0005085::guanyl-nucleotide exchange factor activity;GO:0005515::protein binding;GO:0005886::plasma membrane;GO:0007165::signal transduction;GO:0007264::small GTPase mediated signal transduction;GO:0008233::peptidase activity;GO:0008948::oxaloacetate decarboxylase activity;GO:0009372::quorum sensing;GO:0009405::pathogenesis;GO:0015081::sodium ion t…
NC_037641.1	6807830	6808185	6807992;6808021;6807998	239	294	247	169	204	129	3.036	3.8232	3.51912	2.3647	2.77775	2.2529	1.92096	2.41904	2.22664	1.49621	1.75756	1.42547	0.488883	0.0284756	1	+	+	+	-	-	-	Promoter (<=1kb)	6808303	6977717	169415	1	408810	#NAME?	-118	GO:0004252::serine-type endopeptidase activity;GO:0005085::guanyl-nucleotide exchange factor activity;GO:0005515::protein binding;GO:0005886::plasma membrane;GO:0007165::signal transduction;GO:0007264::small GTPase mediated signal transduction;GO:0008233::peptidase activity;GO:0008948::oxaloacetate decarboxylase activity;GO:0009372::quorum sensing;GO:0009405::pathogenesis;GO:0015081::sodium ion t…
NC_037641.1	6855235	6855501	6855329;6855348;6855360	252	242	199	80	91	46	3.20045	3.14928	2.838	1.12671	1.2466	0.81451	2.70002	2.65685	2.39424	0.950533	1.05168	0.68715	1.52714	0.0003383	1	+	+	+	-	-	-	Intron (XM_016911575.2/408810, intron 4 of 21)	6840769	6977717	136949	1	408810	#NAME?	14466	GO:0004252::serine-type endopeptidase activity;GO:0005085::guanyl-nucleotide exchange factor activity;GO:0005515::protein binding;GO:0005886::plasma membrane;GO:0007165::signal transduction;GO:0007264::small GTPase mediated signal transduction;GO:0008233::peptidase activity;GO:0008948::oxaloacetate decarboxylase activity;GO:0009372::quorum sensing;GO:0009405::pathogenesis;GO:0015081::sodium ion t…
NC_037641.1	6960243	6960716	6960575;6960560;6960575	606	987	754	400	489	429	7.67855	12.8045	10.7134	5.57791	6.6395	7.4519	3.64895	6.08486	5.09115	2.65069	3.15518	3.54124	0.665436	0.109872	1	+	+	+	-	-	-	Intron (XM_016911575.2/408810, intron 5 of 21)	6963880	6977717	13838	1	408810	#NAME?	-3164	GO:0004252::serine-type endopeptidase activity;GO:0005085::guanyl-nucleotide exchange factor activity;GO:0005515::protein binding;GO:0005886::plasma membrane;GO:0007165::signal transduction;GO:0007264::small GTPase mediated signal transduction;GO:0008233::peptidase activity;GO:0008948::oxaloacetate decarboxylase activity;GO:0009372::quorum sensing;GO:0009405::pathogenesis;GO:0015081::sodium ion t…
NC_037641.1	6865304	6866045	6865525;6865748;6865565;6865545;6865768	483	742	574	422	346	211	6.1226	9.62928	8.15925	5.88393	4.70185	3.67396	1.85865	2.92319	2.47692	1.7862	1.42735	1.11531	0.745735	0.0663743	1	+	+	+	-	-	-	Intron (XM_016911575.2/408810, intron 4 of 21)	6880033	6977717	97685	1	408810	#NAME?	-13988	GO:0004252::serine-type endopeptidase activity;GO:0005085::guanyl-nucleotide exchange factor activity;GO:0005515::protein binding;GO:0005886::plasma membrane;GO:0007165::signal transduction;GO:0007264::small GTPase mediated signal transduction;GO:0008233::peptidase activity;GO:0008948::oxaloacetate decarboxylase activity;GO:0009372::quorum sensing;GO:0009405::pathogenesis;GO:0015081::sodium ion t…
NC_037641.1	5042876	5043243	5043053;5043071;5043065	413	388	394	179	130	131	5.2371	5.04144	5.60505	2.5038	1.77505	2.28756	3.2056	3.08584	3.43082	1.53256	1.0865	1.4002	1.27436	0.000480916	1	+	+	+	-	-	-	Promoter (2-3kb)	5036832	5045401	8570	2	408817	#NAME?	2158	GO:0008483::transaminase activity;GO:0030170::pyridoxal phosphate binding
NC_037642.1	13652182	13652856	13652455;13652720;13652368;13652740;13652452;13652706	1239	959	848	659	508	435	15.686	12.4416	12.0473	9.1806	6.89695	7.55588	5.2345	4.15182	4.02024	3.06361	2.30155	2.52144	0.765465	0.0223194	1	+	+	+	-	-	-	Exon (XM_016912113.2/408821, exon 7 of 26)	13648475	13661108	12634	1	408821	#NAME?	3707	GO:0003779::actin binding;GO:0005198::structural molecule activity;GO:0005634::nucleus;GO:0005737::cytoplasm;GO:0006606::protein import into nucleus;GO:0008565::protein transporter activity;GO:0016043::cellular component organization;GO:0017048::Rho GTPase binding;GO:0019028::viral capsid;GO:0019031::viral envelope;GO:0030036::actin cytoskeleton organization
NC_037642.1	13644970	13645179	13645071;13645075;13645073	621	510	434	619	662	562	7.8683	6.62256	6.17265	8.6242	8.98365	9.75679	8.43972	7.10351	6.62093	9.25052	9.63607	10.4654	-0.405228	0.0273044	1	+	+	+	-	-	-	Promoter (<=1kb)	13645067	13661108	16042	1	408821	#NAME?	0	GO:0003779::actin binding;GO:0005198::structural molecule activity;GO:0005634::nucleus;GO:0005737::cytoplasm;GO:0006606::protein import into nucleus;GO:0008565::protein transporter activity;GO:0016043::cellular component organization;GO:0017048::Rho GTPase binding;GO:0019028::viral capsid;GO:0019031::viral envelope;GO:0030036::actin cytoskeleton organization
NC_037642.1	1304244	1304938	1304599;1304633;1304594;1304817	411	629	588	298	291	184	5.2118	8.1648	8.35791	4.15909	3.9566	3.20605	1.68915	2.64623	2.70882	1.34797	1.28234	1.03909	0.940892	0.0667262	1	+	+	+	-	-	-	Intron (XM_026440819.1/408822, intron 2 of 18)	1279705	1750482	470778	1	408822	#NAME?	24539	GO:0003779::actin binding;GO:0005246::calcium channel regulator activity;GO:0005525::GTP binding;GO:0005576::extracellular region;GO:0005739::mitochondrion;GO:0006816::calcium ion transport;GO:0007010::cytoskeleton organization;GO:0016020::membrane;GO:0016614::oxidoreductase activity, acting on CH-OH group of donors;GO:0042030::ATPase inhibitor activity;GO:0042381::hemolymph coagulation;GO:004687…
NC_037642.1	1260420	1260850	1260617;1260692;1260655	257	363	345	230	195	149	3.2637	4.71744	4.90974	3.21321	2.6558	2.5995	1.70569	2.46545	2.56595	1.6793	1.38798	1.35856	0.606171	0.0907944	1	+	+	+	-	-	-	Intron (XM_026440819.1/408822, intron 2 of 18)	1279705	1750482	470778	1	408822	#NAME?	-18855	GO:0003779::actin binding;GO:0005246::calcium channel regulator activity;GO:0005525::GTP binding;GO:0005576::extracellular region;GO:0005739::mitochondrion;GO:0006816::calcium ion transport;GO:0007010::cytoskeleton organization;GO:0016020::membrane;GO:0016614::oxidoreductase activity, acting on CH-OH group of donors;GO:0042030::ATPase inhibitor activity;GO:0042381::hemolymph coagulation;GO:004687…
NC_037642.1	1068634	1068922	1068783;1068792;1068837	213	262	212	198	184	122	2.7071	3.40848	3.02247	2.76809	2.50675	2.13159	2.10995	2.65662	2.35576	2.15749	1.9538	1.66139	0.303108	0.103776	1	+	+	+	-	-	-	Intron (XM_026440819.1/408822, intron 1 of 18)	1052064	1750482	698419	1	408822	#NAME?	16570	GO:0003779::actin binding;GO:0005246::calcium channel regulator activity;GO:0005525::GTP binding;GO:0005576::extracellular region;GO:0005739::mitochondrion;GO:0006816::calcium ion transport;GO:0007010::cytoskeleton organization;GO:0016020::membrane;GO:0016614::oxidoreductase activity, acting on CH-OH group of donors;GO:0042030::ATPase inhibitor activity;GO:0042381::hemolymph coagulation;GO:004687…
NC_037642.1	1111227	1111585	1111383;1111368;1111414	245	369	304	168	152	136	3.1119	4.7952	4.32795	2.35079	2.07315	2.37421	1.95253	3.0087	2.71553	1.47498	1.30078	1.48967	0.847806	0.0639918	1	+	+	+	-	-	-	Intron (XM_026440819.1/408822, intron 1 of 18)	1052064	1750482	698419	1	408822	#NAME?	59163	GO:0003779::actin binding;GO:0005246::calcium channel regulator activity;GO:0005525::GTP binding;GO:0005576::extracellular region;GO:0005739::mitochondrion;GO:0006816::calcium ion transport;GO:0007010::cytoskeleton organization;GO:0016020::membrane;GO:0016614::oxidoreductase activity, acting on CH-OH group of donors;GO:0042030::ATPase inhibitor activity;GO:0042381::hemolymph coagulation;GO:004687…
NC_037642.1	1198260	1198683	1198536;1198512;1198556	263	345	300	207	173	118	3.3396	4.48416	4.27119	2.89328	2.3577	2.06227	1.77417	2.38222	2.26908	1.53706	1.25253	1.09559	0.72582	0.0249887	1	+	+	+	-	-	-	Intron (XM_026440819.1/408822, intron 1 of 18)	1182389	1750482	568094	1	408822	#NAME?	15871	GO:0003779::actin binding;GO:0005246::calcium channel regulator activity;GO:0005525::GTP binding;GO:0005576::extracellular region;GO:0005739::mitochondrion;GO:0006816::calcium ion transport;GO:0007010::cytoskeleton organization;GO:0016020::membrane;GO:0016614::oxidoreductase activity, acting on CH-OH group of donors;GO:0042030::ATPase inhibitor activity;GO:0042381::hemolymph coagulation;GO:004687…
NC_037642.1	1417145	1417597	1417410;1417451;1417418	276	323	301	203	238	174	3.50405	4.19904	4.28538	2.83764	3.23845	3.03275	1.74236	2.08794	2.13087	1.411	1.6103	1.50801	0.396308	0.0426652	1	+	+	+	-	-	-	Intron (XM_026440819.1/408822, intron 3 of 18)	1354886	1748416	393531	1	408822	#NAME?	62259	GO:0003779::actin binding;GO:0005246::calcium channel regulator activity;GO:0005525::GTP binding;GO:0005576::extracellular region;GO:0005739::mitochondrion;GO:0006816::calcium ion transport;GO:0007010::cytoskeleton organization;GO:0016020::membrane;GO:0016614::oxidoreductase activity, acting on CH-OH group of donors;GO:0042030::ATPase inhibitor activity;GO:0042381::hemolymph coagulation;GO:004687…
NC_037642.1	1045269	1045825	1045343;1045625;1045585;1045673	498	344	336	226	230	156	6.31235	4.4712	4.78203	3.15757	3.13005	2.72081	2.55272	1.80815	1.93385	1.27692	1.26579	1.1003	0.789012	0.0542408	1	+	+	+	-	-	-	Distal Intergenic	1052064	1750482	698419	1	408822	#NAME?	-6239	GO:0003779::actin binding;GO:0005246::calcium channel regulator activity;GO:0005525::GTP binding;GO:0005576::extracellular region;GO:0005739::mitochondrion;GO:0006816::calcium ion transport;GO:0007010::cytoskeleton organization;GO:0016020::membrane;GO:0016614::oxidoreductase activity, acting on CH-OH group of donors;GO:0042030::ATPase inhibitor activity;GO:0042381::hemolymph coagulation;GO:004687…
NC_037642.1	1414386	1414691	1414558;1414500;1414600	200	227	184	104	82	89	2.54265	2.95488	2.62515	1.46055	1.12465	1.5597	1.87168	2.17513	1.93241	1.07513	0.827871	1.14812	0.970619	0.00190792	1	+	+	+	-	-	-	Intron (XM_026440819.1/408822, intron 3 of 18)	1354886	1748416	393531	1	408822	#NAME?	59500	GO:0003779::actin binding;GO:0005246::calcium channel regulator activity;GO:0005525::GTP binding;GO:0005576::extracellular region;GO:0005739::mitochondrion;GO:0006816::calcium ion transport;GO:0007010::cytoskeleton organization;GO:0016020::membrane;GO:0016614::oxidoreductase activity, acting on CH-OH group of donors;GO:0042030::ATPase inhibitor activity;GO:0042381::hemolymph coagulation;GO:004687…
NC_037642.1	1284575	1284929	1284742;1284753;1284778	254	287	232	214	214	152	3.22575	3.73248	3.30627	2.99065	2.91325	2.65149	2.04677	2.36829	2.09786	1.8976	1.84848	1.6824	0.262758	0.0469441	1	+	+	+	-	-	-	Intron (XM_026440819.1/408822, intron 2 of 18)	1279705	1750482	470778	1	408822	#NAME?	4870	GO:0003779::actin binding;GO:0005246::calcium channel regulator activity;GO:0005525::GTP binding;GO:0005576::extracellular region;GO:0005739::mitochondrion;GO:0006816::calcium ion transport;GO:0007010::cytoskeleton organization;GO:0016020::membrane;GO:0016614::oxidoreductase activity, acting on CH-OH group of donors;GO:0042030::ATPase inhibitor activity;GO:0042381::hemolymph coagulation;GO:004687…
NC_037642.1	1056668	1056900	1056814;1056770;1056772	210	216	177	184	113	73	2.66915	2.81232	2.52582	2.57335	1.5447	1.28242	2.58038	2.71879	2.44182	2.48777	1.49333	1.23977	0.568229	0.153144	1	+	+	+	-	-	-	Intron (XM_026440819.1/408822, intron 1 of 18)	1052064	1750482	698419	1	408822	#NAME?	4604	GO:0003779::actin binding;GO:0005246::calcium channel regulator activity;GO:0005525::GTP binding;GO:0005576::extracellular region;GO:0005739::mitochondrion;GO:0006816::calcium ion transport;GO:0007010::cytoskeleton organization;GO:0016020::membrane;GO:0016614::oxidoreductase activity, acting on CH-OH group of donors;GO:0042030::ATPase inhibitor activity;GO:0042381::hemolymph coagulation;GO:004687…
NC_037642.1	1207727	1208236	1207923;1207856;1208083;1208069	446	445	320	319	300	127	5.65455	5.78016	4.55499	4.4512	4.07855	2.21824	2.49744	2.55291	2.0118	1.96595	1.80137	0.979727	0.573076	0.110371	1	+	+	+	-	-	-	Intron (XM_026440819.1/408822, intron 1 of 18)	1182389	1750482	568094	1	408822	#NAME?	25338	GO:0003779::actin binding;GO:0005246::calcium channel regulator activity;GO:0005525::GTP binding;GO:0005576::extracellular region;GO:0005739::mitochondrion;GO:0006816::calcium ion transport;GO:0007010::cytoskeleton organization;GO:0016020::membrane;GO:0016614::oxidoreductase activity, acting on CH-OH group of donors;GO:0042030::ATPase inhibitor activity;GO:0042381::hemolymph coagulation;GO:004687…
NC_037642.1	5667285	5667701	5667467;5667549;5667562	338	372	307	281	264	190	4.28835	4.83408	4.37052	3.92262	3.59075	3.31003	2.31644	2.61122	2.36082	2.11888	1.93962	1.78798	0.318052	0.0222909	1	+	+	+	-	-	-	Intron (XM_026440550.1/408826, intron 1 of 14)	5659982	5724219	64238	1	408826	#NAME?	7303	GO:0005576::extracellular region;GO:0006355::regulation of transcription, DNA-templated;GO:0007016::cytoskeletal anchoring at plasma membrane;GO:0009405::pathogenesis;GO:0016010::dystrophin-associated glycoprotein complex;GO:0016012::sarcoglycan complex;GO:0016021::integral component of membrane;GO:0019855::calcium channel inhibitor activity
NC_037642.1	5675298	5675711	5675399;5675441;5675578	289	286	275	208	193	122	3.6685	3.71952	3.91644	2.90719	2.6287	2.13159	1.99597	2.02373	2.13087	1.58176	1.43023	1.15976	0.560068	0.0240051	1	+	+	+	-	-	-	Intron (XM_026440550.1/408826, intron 1 of 14)	5659982	5724219	64238	1	408826	#NAME?	15316	GO:0005576::extracellular region;GO:0006355::regulation of transcription, DNA-templated;GO:0007016::cytoskeletal anchoring at plasma membrane;GO:0009405::pathogenesis;GO:0016010::dystrophin-associated glycoprotein complex;GO:0016012::sarcoglycan complex;GO:0016021::integral component of membrane;GO:0019855::calcium channel inhibitor activity
NC_037642.1	9730533	9730940	9730786;9730758;9730809	299	533	506	216	212	180	3.795	6.92064	7.19433	3.01847	2.88615	3.13673	2.09516	3.82078	3.97189	1.66645	1.5934	1.73174	0.986153	0.112734	1	+	+	+	-	-	-	Exon (XR_003304661.1/102654429, exon 4 of 4)	9722200	9750791	28592	1	408840	#NAME?	8333	GO:0000276::mitochondrial proton-transporting ATP synthase complex, coupling factor F(o);GO:0003676::nucleic acid binding;GO:0004527::exonuclease activity;GO:0015078::hydrogen ion transmembrane transporter activity;GO:0015986::ATP synthesis coupled proton transport
NC_037642.1	10001439	10001760	10001535;10001549;10001545	254	317	280	261	248	165	3.22575	4.12128	3.98739	3.64442	3.37395	2.87678	2.25653	2.88299	2.78933	2.54941	2.3602	2.01241	0.195917	0.254459	1	+	+	+	-	-	-	Downstream (2-3kb)	10004669	10014000	9332	2	408842	#NAME?	12240	GO:0001104::RNA polymerase II transcription cofactor activity;GO:0004252::serine-type endopeptidase activity;GO:0005515::protein binding;GO:0005634::nucleus;GO:0005886::plasma membrane;GO:0006357::regulation of transcription from RNA polymerase II promoter;GO:0006886::intracellular protein transport;GO:0006955::immune response;GO:0008536::Ran GTPase binding;GO:0008948::oxaloacetate decarboxylase …
NC_037642.1	10455130	10455423	10455280;10455285;10455281	266	256	249	182	195	156	3.37755	3.33072	3.5475	2.54553	2.6558	2.72081	2.58774	2.55186	2.71795	1.95028	2.03477	2.08457	0.372474	0.000970929	1	+	+	+	-	-	-	Exon (XM_026440805.1/408845, exon 14 of 47)	10450079	10467981	17903	1	408845	#NAME?	5051	GO:0003700::sequence-specific DNA binding transcription factor activity;GO:0006355::regulation of transcription, DNA-templated;GO:0030420::establishment of competence for transformation;GO:0043565::sequence-specific DNA binding
NC_037642.1	10451070	10451479	10451259;10451295;10451264	274	292	378	180	181	119	3.47875	3.79728	5.37801	2.51771	2.4661	2.0796	1.9112	2.0862	2.95464	1.38321	1.35486	1.14252	0.841161	0.0795261	1	+	+	+	-	-	-	Promoter (<=1kb)	10450079	10467981	17903	1	408845	#NAME?	991	GO:0003700::sequence-specific DNA binding transcription factor activity;GO:0006355::regulation of transcription, DNA-templated;GO:0030420::establishment of competence for transformation;GO:0043565::sequence-specific DNA binding
NC_037642.1	10458907	10459359	10459133;10459097;10459087	293	433	382	220	227	158	3.7191	5.62464	5.43477	3.07411	3.0894	2.75547	1.84929	2.79681	2.7024	1.52858	1.53618	1.37014	0.72855	0.0799146	1	+	+	+	-	-	-	Exon (XM_026440805.1/408845, exon 23 of 47)	10468161	10471365	3205	1	408846	#NAME?	-8802	.
NC_037642.1	10465583	10465880	10465728;10465702;10465720	214	261	284	187	118	87	2.71975	3.39552	4.04415	2.61508	1.61245	1.52504	2.05579	2.56659	3.05687	1.97667	1.21881	1.15274	0.82054	0.0475387	1	+	+	+	-	-	-	Promoter (2-3kb)	10468161	10471365	3205	1	408846	#NAME?	-2281	.
NC_037642.1	10461636	10461929	10461768;10461766;10461779	214	303	275	162	153	118	2.71975	3.93984	3.91644	2.26733	2.0867	2.06227	2.08376	3.01855	3.00062	1.73714	1.59874	1.58003	0.720985	0.0715371	1	+	+	+	-	-	-	Exon (XM_026440805.1/408845, exon 29 of 47)	10468161	10471365	3205	1	408846	#NAME?	-6232	.
NC_037642.1	11285744	11286135	11285865;11286010;11286079	2312	1491	1365	1539	1701	1799	29.2595	19.3363	19.3835	21.4214	23.0621	31.194	16.8131	11.111	11.1381	12.3092	13.2519	17.9247	-0.154769	0.597217	1	+	+	+	-	-	-	Intron (XM_026440936.1/408852, intron 7 of 13)	11277375	11300714	23340	1	408852	#NAME?	8369	GO:0005515::protein binding;GO:0006355::regulation of transcription, DNA-templated;GO:0015031::protein transport;GO:0016020::membrane;GO:0016021::integral component of membrane;GO:0022904::respiratory electron transport chain;GO:0046983::protein dimerization activity
NC_037642.1	12539580	12539808	12539678;12539694;12539697	446	358	327	163	134	117	5.65455	4.65264	4.65432	2.28124	1.82925	2.04494	5.56198	4.57647	4.57812	2.24389	1.7993	2.01146	1.28132	0.0063465	1	+	+	+	-	-	-	Promoter (1-2kb)	12541345	12557089	15745	1	408862	#NAME?	-1537	GO:0004656::procollagen-proline 4-dioxygenase activity;GO:0005783::endoplasmic reticulum;GO:0016491::oxidoreductase activity;GO:0016702::oxidoreductase activity, acting on single donors with incorporation of molecular oxygen, incorporation of two atoms of oxygen;GO:0048309::endoplasmic reticulum inheritance;GO:0051028::mRNA transport;GO:0051321::meiotic cell cycle;GO:0055114::oxidation-reduction …
NC_037642.1	12247390	12247681	12247534;12247526;12247531	919	727	580	555	606	296	11.638	9.43488	8.24439	7.73396	8.22485	5.14701	8.97764	7.27813	6.35978	5.96603	6.34471	3.97044	0.47411	0.118116	1	+	+	+	-	-	-	Intron (XM_016912182.2/408862, intron 1 of 11)	12233711	12557089	323379	1	408862	#NAME?	13679	GO:0004656::procollagen-proline 4-dioxygenase activity;GO:0005783::endoplasmic reticulum;GO:0016491::oxidoreductase activity;GO:0016702::oxidoreductase activity, acting on single donors with incorporation of molecular oxygen, incorporation of two atoms of oxygen;GO:0048309::endoplasmic reticulum inheritance;GO:0051028::mRNA transport;GO:0051321::meiotic cell cycle;GO:0055114::oxidation-reduction …
NC_037642.1	12241386	12241733	12241588;12241595;12241614	707	525	663	415	347	422	8.9562	6.81696	9.42216	5.78656	4.7154	7.33059	5.7971	4.41243	6.09871	3.74548	3.05215	4.74489	0.498643	0.0905731	1	+	+	+	-	-	-	Intron (XM_016912182.2/408862, intron 1 of 11)	12233711	12557089	323379	1	408862	#NAME?	7675	GO:0004656::procollagen-proline 4-dioxygenase activity;GO:0005783::endoplasmic reticulum;GO:0016491::oxidoreductase activity;GO:0016702::oxidoreductase activity, acting on single donors with incorporation of molecular oxygen, incorporation of two atoms of oxygen;GO:0048309::endoplasmic reticulum inheritance;GO:0051028::mRNA transport;GO:0051321::meiotic cell cycle;GO:0055114::oxidation-reduction …
NC_037643.1	15212857	15213320	15213012;15213128;15213173	351	369	374	232	234	185	4.4528	4.7952	5.32125	3.24103	3.18425	3.22338	2.16163	2.32785	2.58322	1.57337	1.54581	1.5648	0.594526	0.022495	1	+	+	+	-	-	-	Distal Intergenic	15129832	15202295	72464	2	408872	#NAME?	-10562	GO:0003700::sequence-specific DNA binding transcription factor activity;GO:0005634::nucleus;GO:0005739::mitochondrion;GO:0006355::regulation of transcription, DNA-templated;GO:0008270::zinc ion binding;GO:0043401::steroid hormone mediated signaling pathway;GO:0043565::sequence-specific DNA binding
NC_037643.1	15209318	15209628	15209448;15209428;15209470	291	394	347	194	190	119	3.6938	5.1192	4.93812	2.71245	2.58805	2.0796	2.67534	3.70773	3.57658	1.96457	1.87447	1.50621	0.897837	0.0273031	1	+	+	+	-	-	-	Distal Intergenic	15129832	15202295	72464	2	408872	#NAME?	-7023	GO:0003700::sequence-specific DNA binding transcription factor activity;GO:0005634::nucleus;GO:0005739::mitochondrion;GO:0006355::regulation of transcription, DNA-templated;GO:0008270::zinc ion binding;GO:0043401::steroid hormone mediated signaling pathway;GO:0043565::sequence-specific DNA binding
NC_037643.1	15172998	15173285	15173108;15173127;15173116	1382	804	796	686	1041	1340	17.4949	10.4328	11.3094	9.55617	14.1191	23.2395	13.6831	8.15971	8.84532	7.47408	11.0428	18.1761	-0.257824	0.615096	1	+	+	+	-	-	-	Intron (XM_026441131.1/408872, intron 2 of 3)	15129832	15202295	72464	2	408872	#NAME?	29010	GO:0003700::sequence-specific DNA binding transcription factor activity;GO:0005634::nucleus;GO:0005739::mitochondrion;GO:0006355::regulation of transcription, DNA-templated;GO:0008270::zinc ion binding;GO:0043401::steroid hormone mediated signaling pathway;GO:0043565::sequence-specific DNA binding
NC_037643.1	15220543	15220862	15220681;15220703;15220679	306	314	322	178	166	137	3.88355	4.0824	4.58337	2.48989	2.26285	2.39154	2.73367	2.87364	3.22628	1.75266	1.59284	1.68343	0.812749	0.00819102	1	+	+	+	-	-	-	Distal Intergenic	15129832	15202295	72464	2	408872	#NAME?	-18248	GO:0003700::sequence-specific DNA binding transcription factor activity;GO:0005634::nucleus;GO:0005739::mitochondrion;GO:0006355::regulation of transcription, DNA-templated;GO:0008270::zinc ion binding;GO:0043401::steroid hormone mediated signaling pathway;GO:0043565::sequence-specific DNA binding
NC_037643.1	15230607	15230932	15230772;15230792;15230792	223	315	227	168	122	150	2.8336	4.09536	3.23532	2.35079	1.66665	2.61683	1.95789	2.8297	2.23546	1.62429	1.15158	1.80811	0.615498	0.0700125	1	+	+	+	-	-	-	Distal Intergenic	15129832	15202295	72464	2	408872	#NAME?	-28312	GO:0003700::sequence-specific DNA binding transcription factor activity;GO:0005634::nucleus;GO:0005739::mitochondrion;GO:0006355::regulation of transcription, DNA-templated;GO:0008270::zinc ion binding;GO:0043401::steroid hormone mediated signaling pathway;GO:0043565::sequence-specific DNA binding
NC_037643.1	14405033	14405305	14405168;14405153;14405182	292	232	230	112	152	126	3.70645	3.01968	3.27789	1.57183	2.07315	2.20091	3.05817	2.49152	2.70457	1.29691	1.71055	1.81596	0.775085	0.00754641	1	+	+	+	-	-	-	Intron (XM_006570518.3/408874, intron 3 of 30)	14419042	14496462	77421	1	408874	#NAME?	-13737	GO:0003779::actin binding;GO:0005215::transporter activity;GO:0005739::mitochondrion;GO:0007010::cytoskeleton organization;GO:0009297::pilus assembly;GO:0016020::membrane;GO:0016032::viral process;GO:0016817::hydrolase activity, acting on acid anhydrides;GO:0019033::viral tegument;GO:0019867::outer membrane;GO:0055085::transmembrane transport
NC_037643.1	14370156	14370424	14370290;14370295;14370302	269	266	245	184	183	100	3.4155	3.46032	3.49074	2.57335	2.4932	1.75033	2.86002	2.89755	2.92302	2.15483	2.08772	1.46566	0.604754	0.044829	1	+	+	+	-	-	-	Promoter (2-3kb)	14367738	14496462	128725	1	408874	#NAME?	2418	GO:0003779::actin binding;GO:0005215::transporter activity;GO:0005739::mitochondrion;GO:0007010::cytoskeleton organization;GO:0009297::pilus assembly;GO:0016020::membrane;GO:0016032::viral process;GO:0016817::hydrolase activity, acting on acid anhydrides;GO:0019033::viral tegument;GO:0019867::outer membrane;GO:0055085::transmembrane transport
NC_037643.1	12008219	12008673	12008467;12008437;12008444	1064	340	343	131	154	163	13.4722	4.41936	4.88136	1.83612	2.10025	2.84212	6.66951	2.18783	2.41655	0.908984	1.03974	1.40701	1.74828	0.210779	1	+	+	+	-	-	-	Intron (XM_016912569.2/408877, intron 1 of 6)	11986147	12101047	114901	1	408877	#NAME?	22072	GO:0000398::mRNA splicing, via spliceosome;GO:0000775::chromosome, centromeric region;GO:0003677::DNA binding;GO:0003682::chromatin binding;GO:0003700::sequence-specific DNA binding transcription factor activity;GO:0005634::nucleus;GO:0005681::spliceosomal complex;GO:0006355::regulation of transcription, DNA-templated;GO:0008270::zinc ion binding;GO:0016020::membrane;GO:0019013::viral nucleocapsi…
NC_037643.1	9755875	9756243	9756041;9756048;9756053	278	314	329	190	179	111	3.52935	4.0824	4.6827	2.65681	2.439	1.94096	2.15444	2.49204	2.85849	1.62181	1.48885	1.18483	0.805022	0.016349	1	+	+	+	-	-	-	Exon (XM_001121094.5/725218, exon 5 of 8)	9761154	9763714	2561	2	408882	#NAME?	7471	GO:0003690::double-stranded DNA binding;GO:0003924::GTPase activity;GO:0005524::ATP binding;GO:0005525::GTP binding;GO:0006606::protein import into nucleus;GO:0006914::autophagy;GO:0007264::small GTPase mediated signal transduction;GO:0010508::positive regulation of autophagy;GO:0016887::ATPase activity;GO:0042262::DNA protection
NC_037643.1	9515795	9516290	9516094;9516108;9516129	583	684	511	292	413	225	7.3876	8.8776	7.26528	4.07563	5.6097	3.91658	3.35497	4.03163	3.29942	1.85089	2.54756	1.77866	0.790721	0.0115311	1	+	+	+	-	-	-	Promoter (2-3kb)	9518925	9665415	146491	1	408884	#NAME?	-2635	GO:0000150::recombinase activity;GO:0003677::DNA binding;GO:0003700::sequence-specific DNA binding transcription factor activity;GO:0006310::DNA recombination;GO:0006355::regulation of transcription, DNA-templated;GO:0006812::cation transport;GO:0008324::cation transmembrane transporter activity;GO:0016020::membrane
NC_037643.1	9619709	9620050	9619876;9619824;9619855	848	452	380	107	121	108	10.7399	5.87088	5.40639	1.50228	1.6531	1.88897	7.0736	3.86673	3.5608	0.989444	1.08878	1.24413	2.12589	0.0794932	1	+	+	+	-	-	-	Intron (XM_016912656.2/408884, intron 2 of 8)	9582026	9665415	83390	1	408884	#NAME?	37683	GO:0000150::recombinase activity;GO:0003677::DNA binding;GO:0003700::sequence-specific DNA binding transcription factor activity;GO:0006310::DNA recombination;GO:0006355::regulation of transcription, DNA-templated;GO:0006812::cation transport;GO:0008324::cation transmembrane transporter activity;GO:0016020::membrane
NC_037643.1	9549524	9550067	9549856;9549865;9549840	294	543	569	206	225	174	3.73175	7.05024	8.0883	2.87937	3.0623	3.03275	1.54518	2.91925	3.34907	1.19224	1.26799	1.25575	1.07223	0.128446	1	+	+	+	-	-	-	Intron (XM_016912656.2/408884, intron 1 of 8)	9518925	9665415	146491	1	408884	#NAME?	30599	GO:0000150::recombinase activity;GO:0003677::DNA binding;GO:0003700::sequence-specific DNA binding transcription factor activity;GO:0006310::DNA recombination;GO:0006355::regulation of transcription, DNA-templated;GO:0006812::cation transport;GO:0008324::cation transmembrane transporter activity;GO:0016020::membrane
NC_037643.1	9557244	9557712	9557434;9557457;9557431	278	315	397	191	217	112	3.52935	4.09536	5.64762	2.67072	2.9539	1.95829	1.69507	1.96692	2.71243	1.28269	1.4187	0.940526	0.807598	0.0776335	1	+	+	+	-	-	-	Intron (XM_016912656.2/408884, intron 1 of 8)	9582023	9667691	85669	1	408884	#NAME?	-24311	GO:0000150::recombinase activity;GO:0003677::DNA binding;GO:0003700::sequence-specific DNA binding transcription factor activity;GO:0006310::DNA recombination;GO:0006355::regulation of transcription, DNA-templated;GO:0006812::cation transport;GO:0008324::cation transmembrane transporter activity;GO:0016020::membrane
NC_037643.1	9573861	9574249	9574124;9574099;9574148	274	379	333	209	251	141	3.47875	4.9248	4.73946	2.9211	3.4146	2.46086	2.01437	2.85171	2.74439	1.69147	1.97723	1.42496	0.579284	0.0650283	1	+	+	+	-	-	-	Intron (XM_016912656.2/408884, intron 1 of 8)	9582023	9667691	85669	1	408884	#NAME?	-7774	GO:0000150::recombinase activity;GO:0003677::DNA binding;GO:0003700::sequence-specific DNA binding transcription factor activity;GO:0006310::DNA recombination;GO:0006355::regulation of transcription, DNA-templated;GO:0006812::cation transport;GO:0008324::cation transmembrane transporter activity;GO:0016020::membrane
NC_037643.1	9580517	9580741	9580615;9580624;9580630	1188	1135	879	698	766	546	15.0408	14.7226	12.4872	9.72309	10.3928	9.47951	15.0576	14.739	12.5011	9.73393	10.4044	9.49008	0.513599	0.0247215	1	+	+	+	-	-	-	Promoter (1-2kb)	9582023	9667691	85669	1	408884	#NAME?	-1282	GO:0000150::recombinase activity;GO:0003677::DNA binding;GO:0003700::sequence-specific DNA binding transcription factor activity;GO:0006310::DNA recombination;GO:0006355::regulation of transcription, DNA-templated;GO:0006812::cation transport;GO:0008324::cation transmembrane transporter activity;GO:0016020::membrane
NC_037643.1	8486361	8486889	8486541;8486561;8486620	1020	1206	1418	550	464	424	12.9156	15.6427	20.1356	7.66441	6.30075	7.36525	5.49953	6.66074	8.57384	3.26354	2.68289	3.13616	1.19083	0.0447782	1	+	+	+	-	-	-	Promoter (1-2kb)	8485219	8498067	12849	1	408888	#NAME?	1142	GO:0003746::translation elongation factor activity;GO:0005515::protein binding;GO:0006414::translational elongation
NC_037643.1	8211281	8211633	8211445;8211452;8211462	549	524	536	238	334	221	6.9575	6.804	7.62003	3.32449	4.53925	3.84726	4.43961	4.34166	4.86238	2.12137	2.89652	2.45495	0.868501	0.00254982	1	+	+	+	-	-	-	Intron (XM_006565411.3/408890, intron 2 of 11)	8136013	8221113	85101	2	408890	#NAME?	9480	GO:0005515::protein binding;GO:0005739::mitochondrion
NC_037643.1	8228248	8228589	8228379;8228406;8228383	295	314	326	142	149	128	3.7444	4.0824	4.64013	1.98913	2.0325	2.23557	2.46617	2.68878	3.05612	1.3101	1.33866	1.47241	0.994517	0.0106751	1	+	+	+	-	-	-	Intron (XM_006565410.3/408890, intron 1 of 12)	8136013	8221113	85101	2	408890	#NAME?	-7135	GO:0005515::protein binding;GO:0005739::mitochondrion
NC_037643.1	8190865	8191390	8191020;8191345;8191135;8191277	329	446	503	199	279	157	4.1745	5.79312	7.15176	2.782	3.794	2.73814	1.78766	2.48081	3.06262	1.19135	1.62472	1.17256	0.878136	0.0786402	1	+	+	+	-	-	-	Intron (XM_006565411.3/408890, intron 3 of 11)	8136013	8221113	85101	2	408890	#NAME?	29723	GO:0005515::protein binding;GO:0005739::mitochondrion
NC_037643.1	8140480	8141019	8140873;8140892;8140906	888	935	998	856	657	461	11.2458	12.1306	14.1758	11.9209	8.9159	8.00646	4.69097	5.06005	5.91317	4.97258	3.7191	3.33974	0.380663	0.125286	1	+	+	+	-	-	-	Exon (XM_006565411.3/408890, exon 10 of 12)	8132236	8134544	2309	2	408891	#NAME?	-5936	GO:0003677::DNA binding;GO:0005634::nucleus
NC_037643.1	8144473	8144890	8144687;8144685;8144686	463	562	641	311	269	196	5.8696	7.29648	9.10998	4.33992	3.6585	3.41401	3.163	3.93191	4.90917	2.33869	1.97148	1.83973	0.964888	0.0512392	1	+	+	+	-	-	-	Intron (XM_006565411.3/408890, intron 6 of 11)	8132236	8134544	2309	2	408891	#NAME?	-9929	GO:0003677::DNA binding;GO:0005634::nucleus
NC_037643.1	7977929	7978538	7978069;7978105;7978114	313	463	429	180	223	124	3.9721	6.01344	6.1017	2.51771	3.0352	2.16625	1.46675	2.22055	2.25314	0.929699	1.12079	0.799918	1.0594	0.0439969	1	+	+	+	-	-	-	Distal Intergenic	7967608	7969274	1667	2	408892	#NAME?	-8655	GO:0003824::catalytic activity;GO:0003857::3-hydroxyacyl-CoA dehydrogenase activity;GO:0004488::methylenetetrahydrofolate dehydrogenase (NADP+) activity;GO:0005524::ATP binding;GO:0006631::fatty acid metabolic process;GO:0006779::porphyrin-containing compound biosynthetic process;GO:0008152::metabolic process;GO:0009396::folic acid-containing compound biosynthetic process;GO:0016491::oxidoreducta…
NC_037643.1	7252451	7252863	7252649;7252659;7252661	286	362	374	199	175	107	3.63055	4.70448	5.32125	2.782	2.3848	1.87164	1.98011	2.56583	2.90222	1.51731	1.30067	1.0208	0.956237	0.0282148	1	+	+	+	-	-	-	Exon (XM_006564127.3/408894, exon 9 of 16)	7229529	7292653	63125	1	408894	#NAME?	22922	GO:0005515::protein binding;GO:0005576::extracellular region;GO:0005801::cis-Golgi network;GO:0006886::intracellular protein transport;GO:0009405::pathogenesis;GO:0016020::membrane
NC_037643.1	7230164	7230552	7230347;7230352;7230353	368	328	370	216	229	147	4.66785	4.26384	5.26449	3.01847	3.1165	2.56484	2.70292	2.46898	3.04841	1.74785	1.80461	1.48517	0.706447	0.0100761	1	+	+	+	-	-	-	Promoter (<=1kb)	7229529	7292653	63125	1	408894	#NAME?	635	GO:0005515::protein binding;GO:0005576::extracellular region;GO:0005801::cis-Golgi network;GO:0006886::intracellular protein transport;GO:0009405::pathogenesis;GO:0016020::membrane
NC_037643.1	7254204	7254737	7254580;7254594;7254579	445	509	430	226	147	81	5.6419	6.6096	6.11589	3.15757	2.0054	1.42106	2.37986	2.78805	2.57979	1.33192	0.845914	0.599429	1.4801	0.00597047	1	+	+	+	-	-	-	Intron (XM_006564127.3/408894, intron 9 of 15)	7229529	7292653	63125	1	408894	#NAME?	24675	GO:0005515::protein binding;GO:0005576::extracellular region;GO:0005801::cis-Golgi network;GO:0006886::intracellular protein transport;GO:0009405::pathogenesis;GO:0016020::membrane
NC_037643.1	7210280	7210537	7210403;7210407;7210418	1152	918	774	493	552	456	14.5854	11.9102	10.9972	6.87154	7.49315	7.91981	12.734	10.3984	9.60128	5.9993	6.54201	6.91451	0.750573	0.0342374	1	+	+	+	-	-	-	Promoter (<=1kb)	7209599	7292653	83055	1	408894	#NAME?	681	GO:0005515::protein binding;GO:0005576::extracellular region;GO:0005801::cis-Golgi network;GO:0006886::intracellular protein transport;GO:0009405::pathogenesis;GO:0016020::membrane
NC_037643.1	7246775	7247434	7246935;7247257;7246958;7247253;7246949	315	523	551	222	306	134	3.9974	6.79104	7.83288	3.10193	4.15985	2.33955	1.36427	2.31771	2.67328	1.05866	1.41971	0.798463	0.955649	0.102952	1	+	+	+	-	-	-	Intron (XM_006564127.3/408894, intron 5 of 15)	7229529	7292653	63125	1	408894	#NAME?	17246	GO:0005515::protein binding;GO:0005576::extracellular region;GO:0005801::cis-Golgi network;GO:0006886::intracellular protein transport;GO:0009405::pathogenesis;GO:0016020::membrane
NC_037644.1	14024007	14024397	14024107;14024135;14024120;14024380	304	414	384	199	224	172	3.85825	5.3784	5.46315	2.782	3.04875	2.99809	2.2227	3.09844	3.14726	1.60268	1.75635	1.72717	0.735501	0.0609732	1	+	+	+	-	-	-	Intron (XM_026441639.1/408897, intron 1 of 13)	14016898	14184932	168035	1	408897	#NAME?	7109	GO:0000746::conjugation;GO:0007411::axon guidance;GO:0016021::integral component of membrane;GO:0019087::transformation of host cell by virus
NC_037644.1	14008083	14008415	14008214;14008212;14008213	582	569	541	403	324	201	7.37495	7.3872	7.69098	5.61964	4.40375	3.50066	4.98863	4.99692	5.2024	3.80129	2.97882	2.36795	0.731389	0.0368305	1	+	+	+	-	-	-	Distal Intergenic	14016898	14184932	168035	1	408897	#NAME?	-8483	GO:0000746::conjugation;GO:0007411::axon guidance;GO:0016021::integral component of membrane;GO:0019087::transformation of host cell by virus
NC_037644.1	13982884	13983684	13983219;13983465;13983031;13983456;13983466	1895	859	572	435	449	390	23.9844	11.1456	8.13087	6.06476	6.0975	6.77603	6.7447	3.13428	2.2865	1.70548	1.71469	1.9055	1.19176	0.237052	1	+	+	+	-	-	-	Intron (XM_026441643.1/408898, intron 2 of 8)	13978675	14003680	25006	1	408898	#NAME?	4209	GO:0001558::regulation of cell growth;GO:0003700::sequence-specific DNA binding transcription factor activity;GO:0005739::mitochondrion;GO:0008083::growth factor activity;GO:0016020::membrane;GO:0055085::transmembrane transport;GO:0097351::toxin-antitoxin pair type II binding
NC_037644.1	13707048	13707291	13707159;13707169;13707180	381	328	279	394	319	167	4.8323	4.26384	3.9732	5.49445	4.336	2.91144	4.46098	3.9362	3.6679	5.07225	4.00282	2.68772	0.036607	0.900458	1	+	+	+	-	-	-	Promoter (<=1kb)	13691070	13707796	16727	2	408906	#NAME?	505	GO:0003677::DNA binding;GO:0003899::DNA-directed RNA polymerase activity;GO:0005515::protein binding;GO:0005634::nucleus;GO:0005890::sodium:potassium-exchanging ATPase complex;GO:0006351::transcription, DNA-templated;GO:0006813::potassium ion transport;GO:0006814::sodium ion transport;GO:0007067::mitotic nuclear division;GO:0042729::DASH complex;GO:0044238::primary metabolic process;GO:0072686::m…
NC_037644.1	13696390	13697059	13696553;13696885;13696569;13696910;13696552;13696935	601	778	718	547	347	291	7.6153	10.0958	10.2026	7.62268	4.7154	5.06036	2.56023	3.39416	3.43007	2.56271	1.5853	1.70127	0.682015	0.0486554	1	+	+	+	-	-	-	3' UTR	13691070	13703003	11934	2	408906	#NAME?	5944	GO:0003677::DNA binding;GO:0003899::DNA-directed RNA polymerase activity;GO:0005515::protein binding;GO:0005634::nucleus;GO:0005890::sodium:potassium-exchanging ATPase complex;GO:0006351::transcription, DNA-templated;GO:0006813::potassium ion transport;GO:0006814::sodium ion transport;GO:0007067::mitotic nuclear division;GO:0042729::DASH complex;GO:0044238::primary metabolic process;GO:0072686::m…
NC_037644.1	12899217	12899640	12899465;12899445;12899486	258	451	406	106	175	166	3.27635	5.85792	5.77533	1.48837	2.3848	2.89411	1.74057	3.11203	3.06816	0.7907	1.26693	1.5375	1.13959	0.0662364	1	+	+	+	-	-	-	Exon (XM_026441773.1/408914, exon 3 of 27)	12842715	12944129	101415	2	408914	#NAME?	44489	GO:0000775::chromosome, centromeric region;GO:0003677::DNA binding;GO:0003682::chromatin binding;GO:0003700::sequence-specific DNA binding transcription factor activity;GO:0005515::protein binding;GO:0005634::nucleus;GO:0006355::regulation of transcription, DNA-templated;GO:0006855::drug transmembrane transport;GO:0008270::zinc ion binding;GO:0015238::drug transmembrane transporter activity;GO:00…
NC_037644.1	12950669	12950918	12950771;12950789;12950801	260	224	227	183	192	85	3.30165	2.916	3.23532	2.55944	2.61515	1.49038	2.9748	2.62733	2.91503	2.30606	2.35626	1.34284	0.504169	0.115215	1	+	+	+	-	-	-	Intron (XM_026441772.1/408914, intron 1 of 26)	12842715	12945939	103225	2	408914	#NAME?	-4730	GO:0000775::chromosome, centromeric region;GO:0003677::DNA binding;GO:0003682::chromatin binding;GO:0003700::sequence-specific DNA binding transcription factor activity;GO:0005515::protein binding;GO:0005634::nucleus;GO:0006355::regulation of transcription, DNA-templated;GO:0006855::drug transmembrane transport;GO:0008270::zinc ion binding;GO:0015238::drug transmembrane transporter activity;GO:00…
NC_037644.1	12702458	12702883	12702609;12702637;12702625	327	463	258	108	111	97	4.1492	6.01344	3.67521	1.51619	1.5176	1.69834	2.19392	3.17965	1.9433	0.801698	0.802443	0.898011	1.54806	0.0501519	1	+	+	+	-	-	-	Intron (XM_016913010.2/408915, intron 1 of 8)	12538654	12708493	169840	2	408915	#NAME?	5610	GO:0000103::sulfate assimilation;GO:0003333::amino acid transmembrane transport;GO:0003676::nucleic acid binding;GO:0003779::actin binding;GO:0004020::adenylylsulfate kinase activity;GO:0004190::aspartic-type endopeptidase activity;GO:0004482::mRNA (guanine-N7-)-methyltransferase activity;GO:0005524::ATP binding;GO:0006370::7-methylguanosine mRNA capping;GO:0007010::cytoskeleton organization;GO:0…
NC_037644.1	12694899	12695144	12695012;12695022;12695030	315	214	196	162	144	131	3.9974	2.7864	2.79543	2.26733	1.96475	2.28756	3.66024	2.55138	2.55965	2.07609	1.79903	2.09461	0.555117	0.11869	1	+	+	+	-	-	-	Intron (XM_016913010.2/408915, intron 1 of 8)	12538654	12708493	169840	2	408915	#NAME?	13349	GO:0000103::sulfate assimilation;GO:0003333::amino acid transmembrane transport;GO:0003676::nucleic acid binding;GO:0003779::actin binding;GO:0004020::adenylylsulfate kinase activity;GO:0004190::aspartic-type endopeptidase activity;GO:0004482::mRNA (guanine-N7-)-methyltransferase activity;GO:0005524::ATP binding;GO:0006370::7-methylguanosine mRNA capping;GO:0007010::cytoskeleton organization;GO:0…
NC_037644.1	12700895	12701365	12701188;12701205;12701205	482	504	386	231	224	176	6.10995	6.5448	5.49153	3.22712	3.04875	3.06741	2.92202	3.12998	2.62627	1.54334	1.45803	1.46696	0.957673	0.00887335	1	+	+	+	-	-	-	Intron (XM_016913010.2/408915, intron 1 of 8)	12538654	12708493	169840	2	408915	#NAME?	7128	GO:0000103::sulfate assimilation;GO:0003333::amino acid transmembrane transport;GO:0003676::nucleic acid binding;GO:0003779::actin binding;GO:0004020::adenylylsulfate kinase activity;GO:0004190::aspartic-type endopeptidase activity;GO:0004482::mRNA (guanine-N7-)-methyltransferase activity;GO:0005524::ATP binding;GO:0006370::7-methylguanosine mRNA capping;GO:0007010::cytoskeleton organization;GO:0…
NC_037644.1	12695862	12696221	12696059;12696063;12696075	266	342	256	166	123	51	3.37755	4.44528	3.64683	2.32297	1.6802	0.90116	2.11332	2.7814	2.28181	1.45348	1.0513	0.563853	1.22569	0.0154747	1	+	+	+	-	-	-	Intron (XM_016913010.2/408915, intron 1 of 8)	12538654	12708493	169840	2	408915	#NAME?	12272	GO:0000103::sulfate assimilation;GO:0003333::amino acid transmembrane transport;GO:0003676::nucleic acid binding;GO:0003779::actin binding;GO:0004020::adenylylsulfate kinase activity;GO:0004190::aspartic-type endopeptidase activity;GO:0004482::mRNA (guanine-N7-)-methyltransferase activity;GO:0005524::ATP binding;GO:0006370::7-methylguanosine mRNA capping;GO:0007010::cytoskeleton organization;GO:0…
NC_037644.1	12701773	12702081	12701922;12701942;12701952	367	312	212	104	112	115	4.6552	4.05648	3.02247	1.46055	1.53115	2.01028	3.39349	2.95704	2.20328	1.06469	1.11616	1.46543	1.23014	0.0306889	1	+	+	+	-	-	-	Intron (XM_016913010.2/408915, intron 1 of 8)	12538654	12708493	169840	2	408915	#NAME?	6412	GO:0000103::sulfate assimilation;GO:0003333::amino acid transmembrane transport;GO:0003676::nucleic acid binding;GO:0003779::actin binding;GO:0004020::adenylylsulfate kinase activity;GO:0004190::aspartic-type endopeptidase activity;GO:0004482::mRNA (guanine-N7-)-methyltransferase activity;GO:0005524::ATP binding;GO:0006370::7-methylguanosine mRNA capping;GO:0007010::cytoskeleton organization;GO:0…
NC_037641.1	10538987	10539542	10539088;10539395;10539105;10539362;10539377	464	593	507	249	253	213	5.88225	7.69824	7.20852	3.4775	3.4417	3.70862	2.38306	3.11877	2.92037	1.40883	1.39433	1.50246	0.967975	0.022558	1	+	+	+	-	-	-	Promoter (2-3kb)	10537805	10542200	4396	2	408917	#NAME?	2658	GO:0004672::protein kinase activity;GO:0005524::ATP binding;GO:0006468::protein phosphorylation;GO:0016020::membrane;GO:0016773::phosphotransferase activity, alcohol group as acceptor
NC_037641.1	10535579	10536012	10535776;10535817;10535767	299	384	415	203	173	104	3.795	4.9896	5.90304	2.83764	2.3577	1.81965	1.96965	2.58966	3.06374	1.47277	1.22367	0.944419	1.06609	0.0349085	1	+	+	+	-	-	-	3' UTR	10537805	10542200	4396	2	408917	#NAME?	6188	GO:0004672::protein kinase activity;GO:0005524::ATP binding;GO:0006468::protein phosphorylation;GO:0016020::membrane;GO:0016773::phosphotransferase activity, alcohol group as acceptor
NC_037644.1	11058843	11059126	11058981;11058975;11058975	583	806	794	302	198	208	7.3876	10.4587	11.2811	4.21473	2.69645	3.62197	5.85938	8.29518	8.94746	3.34286	2.13865	2.87272	1.46744	0.0236005	1	+	+	+	-	-	-	Promoter (1-2kb)	11057489	11064874	7386	1	408923	#NAME?	1354	GO:0003700::sequence-specific DNA binding transcription factor activity;GO:0005669::transcription factor TFIID complex;GO:0005921::gap junction;GO:0006352::DNA-templated transcription, initiation;GO:0006355::regulation of transcription, DNA-templated
NC_037644.1	9536560	9536837	9536700;9536697;9536711	276	397	380	154	140	80	3.50405	5.15808	5.40639	2.15605	1.91055	1.40373	2.83917	4.17936	4.38055	1.74695	1.54803	1.13738	1.36277	0.0289359	1	+	+	+	-	-	-	3' UTR	9550759	9553976	3218	1	408928	NM_001160064.1	-13922	GO:0004514::nicotinate-nucleotide diphosphorylase (carboxylating) activity;GO:0005524::ATP binding;GO:0006457::protein folding;GO:0006813::potassium ion transport;GO:0006950::response to stress;GO:0008324::cation transmembrane transporter activity;GO:0009435::NAD biosynthetic process;GO:0051082::unfolded protein binding
NC_037644.1	9539616	9539900	9539765;9539760;9539753	334	424	366	152	137	95	4.23775	5.508	5.20773	2.12823	1.8699	1.66368	3.34932	4.35327	4.11595	1.68206	1.47788	1.3149	1.40115	0.00877333	1	+	+	+	-	-	-	3' UTR	9550759	9553976	3218	1	408928	NM_001160064.1	-10859	GO:0004514::nicotinate-nucleotide diphosphorylase (carboxylating) activity;GO:0005524::ATP binding;GO:0006457::protein folding;GO:0006813::potassium ion transport;GO:0006950::response to stress;GO:0008324::cation transmembrane transporter activity;GO:0009435::NAD biosynthetic process;GO:0051082::unfolded protein binding
NC_037644.1	9535417	9535993	9535490;9535806;9535799;9535828	373	519	519	230	285	189	4.7311	6.7392	7.3788	3.21321	3.8753	3.2927	1.84694	2.63087	2.88056	1.25438	1.51285	1.28541	0.860521	0.0631315	1	+	+	+	-	-	-	3' UTR	9550759	9553976	3218	1	408928	NM_001160064.1	-14766	GO:0004514::nicotinate-nucleotide diphosphorylase (carboxylating) activity;GO:0005524::ATP binding;GO:0006457::protein folding;GO:0006813::potassium ion transport;GO:0006950::response to stress;GO:0008324::cation transmembrane transporter activity;GO:0009435::NAD biosynthetic process;GO:0051082::unfolded protein binding
NC_037644.1	9087367	9087684	9087491;9087525;9087518	279	223	250	148	171	90	3.542	2.90304	3.56169	2.07259	2.3306	1.57703	2.50893	2.05633	2.52287	1.46809	1.65085	1.11707	0.7427	0.0122778	1	+	+	+	-	-	-	Distal Intergenic	9098081	9111467	13387	1	408930	#NAME?	-10397	GO:0005337::nucleoside transmembrane transporter activity;GO:0006810::transport;GO:0008152::metabolic process;GO:0016021::integral component of membrane;GO:0016597::amino acid binding;GO:0016714::oxidoreductase activity, acting on paired donors, with incorporation or reduction of molecular oxygen, reduced pteridine as one donor, and incorporation of one atom of oxygen;GO:0019013::viral nucleocaps…
NC_037644.1	2672654	2672920	2672786;2672800;2672791	355	284	255	200	206	195	4.5034	3.6936	3.63264	2.79591	2.80485	3.39668	3.79923	3.11605	3.06463	2.35873	2.36627	2.86556	0.39482	0.0579446	1	+	+	+	-	-	-	Intron (XM_026441590.1/408942, intron 1 of 8)	2641369	2676855	35487	2	408942	#NAME?	3935	GO:0005524::ATP binding;GO:0006810::transport;GO:0016021::integral component of membrane;GO:0042626::ATPase activity, coupled to transmembrane movement of substances;GO:0055085::transmembrane transport
NC_037644.1	2651602	2651939	2651761;2651755;2651759	334	330	409	216	192	132	4.23775	4.28976	5.8179	3.01847	2.61515	2.30489	2.82413	2.85879	3.87718	2.01158	1.7428	1.53603	0.853649	0.0397347	1	+	+	+	-	-	-	Promoter (1-2kb)	2641369	2653018	11650	2	408942	#NAME?	1079	GO:0005524::ATP binding;GO:0006810::transport;GO:0016021::integral component of membrane;GO:0042626::ATPase activity, coupled to transmembrane movement of substances;GO:0055085::transmembrane transport
NC_037644.1	2667745	2668122	2667903;2667890;2667914	276	262	384	175	164	129	3.50405	3.40848	5.46315	2.44816	2.23575	2.2529	2.08807	2.03112	3.2555	1.45886	1.33229	1.34251	0.835164	0.112139	1	+	+	+	-	-	-	Intron (XM_026441590.1/408942, intron 1 of 8)	2641369	2676855	35487	2	408942	#NAME?	8733	GO:0005524::ATP binding;GO:0006810::transport;GO:0016021::integral component of membrane;GO:0042626::ATPase activity, coupled to transmembrane movement of substances;GO:0055085::transmembrane transport
NC_037644.1	2360288	2361403	2360446;2360783;2360457;2360734;2360492;2361232;2361248	912	836	683	462	532	331	11.5495	10.8475	9.70596	6.44033	7.22215	5.75356	2.33112	2.18943	1.95903	1.2999	1.4577	1.16129	0.725457	0.00413667	1	+	+	+	-	-	-	Promoter (2-3kb)	2357523	2361190	3668	1	408949	#NAME?	2765	GO:0000159::protein phosphatase type 2A complex;GO:0007165::signal transduction;GO:0008601::protein phosphatase type 2A regulator activity;GO:0020037::heme binding
NC_037644.1	2328632	2329004	2328808;2328812;2328812	1664	2053	1607	960	1321	960	21.0622	26.6198	22.8175	13.3675	17.9131	16.6541	12.7192	16.0754	13.7793	8.0725	10.8175	10.0572	0.556543	0.025546	1	+	+	+	-	-	-	Promoter (<=1kb)	2329917	2337531	7615	1	408951	#NAME?	-913	GO:0005201::extracellular matrix structural constituent;GO:0005515::protein binding;GO:0005581::collagen trimer
NC_037644.1	2331719	2331996	2331850;2331856;2331858	919	944	864	535	789	687	11.638	12.2472	12.2744	7.45576	10.7045	11.923	9.42975	9.92335	9.94539	6.04107	8.67337	9.66067	0.265418	0.266599	1	+	+	+	-	-	-	Promoter (1-2kb)	2329917	2337531	7615	1	408951	#NAME?	1802	GO:0005201::extracellular matrix structural constituent;GO:0005515::protein binding;GO:0005581::collagen trimer
NC_037645.1	3102158	3102578	3102349;3102397;3102469	362	262	277	98	154	67	4.59195	3.40848	3.94482	1.37709	2.10025	1.17844	2.45687	1.82367	2.11063	0.736795	1.12371	0.63051	1.35934	0.00597038	1	+	+	+	-	-	-	Intron (XR_003305184.1/113218945, intron 1 of 2)	3126762	3219611	92850	1	408958	#NAME?	-24184	GO:0016021::integral component of membrane
NC_037645.1	3114585	3115004	3114827;3114840;3114873	467	301	284	195	173	79	5.9202	3.91392	4.04415	2.72636	2.3577	1.3864	3.17507	2.09908	2.16892	1.46218	1.26446	0.743542	1.10089	0.0411662	1	+	+	+	-	-	-	Intron (XR_003305184.1/113218945, intron 1 of 2)	3126762	3219611	92850	1	408958	#NAME?	-11758	GO:0016021::integral component of membrane
NC_037645.1	3105496	3105905	3105717;3105743;3105718	430	364	305	171	218	105	5.45215	4.7304	4.34214	2.39252	2.96745	1.83698	2.99537	2.59885	2.38554	1.31443	1.63029	1.00922	1.01305	0.0060811	1	+	+	+	-	-	-	Intron (XR_003305184.1/113218945, intron 1 of 2)	3126762	3219611	92850	1	408958	#NAME?	-20857	GO:0016021::integral component of membrane
NC_037645.1	3078171	3078833	3078394;3078643;3078423;3078409;3078641	507	540	598	274	303	190	6.4262	7.01136	8.49981	3.82525	4.1192	3.31003	2.18327	2.38207	2.88777	1.29961	1.39948	1.12457	0.962891	0.018355	1	+	+	+	-	-	-	Intron (XR_003305184.1/113218945, intron 1 of 2)	3126762	3219611	92850	1	408958	#NAME?	-47929	GO:0016021::integral component of membrane
NC_037645.1	3151188	3151957	3151337;3151715;3151332;3151721;3151742	765	828	659	328	391	221	9.6899	10.7438	9.3654	4.57639	5.3116	3.84726	2.83462	3.14292	2.73969	1.33875	1.55382	1.12545	1.11739	0.000834886	1	+	+	+	-	-	-	Intron (XM_006559588.3/408958, intron 1 of 8)	3126763	3219611	92849	1	408958	#NAME?	24425	GO:0016021::integral component of membrane
NC_037645.1	3129694	3129940	3129812;3129806;3129814	2217	1338	952	873	1527	1013	28.0577	17.3534	13.5231	12.1573	20.7044	17.5726	25.5871	15.8254	12.3323	11.0868	18.8813	16.0253	0.2247	0.609415	1	+	+	+	-	-	-	Promoter (2-3kb)	3126763	3219611	92849	1	408958	#NAME?	2931	GO:0016021::integral component of membrane
NC_037645.1	3081779	3082154	3081947;3081987;3082030	260	298	361	136	174	121	3.30165	3.87504	5.13678	1.90567	2.37125	2.11426	1.97792	2.32143	3.0773	1.14163	1.42055	1.26659	0.946083	0.0602988	1	+	+	+	-	-	-	Intron (XR_003305184.1/113218945, intron 1 of 2)	3126762	3219611	92850	1	408958	#NAME?	-44608	GO:0016021::integral component of membrane
NC_037645.1	3096702	3097100	3096892;3096900;3096972	314	253	288	89	95	78	3.98475	3.29184	4.10091	1.2519	1.3008	1.36907	2.24955	1.85837	2.31512	0.706746	0.734352	0.772893	1.53661	0.00920014	1	+	+	+	-	-	-	Intron (XR_003305184.1/113218945, intron 1 of 2)	3126762	3219611	92850	1	408958	#NAME?	-29662	GO:0016021::integral component of membrane
NC_037645.1	3092760	3093484	3093042;3093209;3093143;3093015;3093296	456	482	536	159	210	160	5.78105	6.25968	7.62003	2.2256	2.85905	2.79013	1.79612	1.94483	2.36747	0.691474	0.888281	0.866868	1.32001	0.0114512	1	+	+	+	-	-	-	Intron (XR_003305184.1/113218945, intron 1 of 2)	3126762	3219611	92850	1	408958	#NAME?	-33278	GO:0016021::integral component of membrane
NC_037645.1	3100578	3101259	3100736;3101022;3100790;3101015;3100845;3100976	843	525	575	209	246	185	10.6766	6.81696	8.17344	2.9211	3.34685	3.22338	3.52627	2.2515	2.69952	0.964781	1.1054	1.06462	1.43523	0.0397742	1	+	+	+	-	-	-	Intron (XR_003305184.1/113218945, intron 1 of 2)	3126762	3219611	92850	1	408958	#NAME?	-25503	GO:0016021::integral component of membrane
NC_037645.1	5175627	5175932	5175777;5175773;5175771	285	523	558	373	375	368	3.6179	6.79104	7.93221	5.20234	5.0948	6.39477	2.66319	4.99898	5.83901	3.82952	3.75035	4.70728	0.135935	0.718409	1	+	+	+	-	-	-	Intron (XM_026442500.1/408961, intron 1 of 26)	5142758	5179126	36369	2	408961	#NAME?	3194	GO:0005198::structural molecule activity;GO:0005319::lipid transporter activity;GO:0005576::extracellular region;GO:0006869::lipid transport;GO:0006886::intracellular protein transport;GO:0008289::lipid binding;GO:0008536::Ran GTPase binding;GO:0019028::viral capsid;GO:0019031::viral envelope;GO:0042157::lipoprotein metabolic process
NC_037645.1	5972243	5972910	5972341;5972704;5972396;5972716;5972807	545	480	489	361	336	280	6.9069	6.23376	6.9531	5.03542	4.56635	4.86973	2.32902	2.10204	2.3446	1.69795	1.53978	1.64208	0.473533	0.00473527	1	+	+	+	-	-	-	Promoter (2-3kb)	5890231	5975587	85357	2	408963	#NAME?	2677	GO:0005057::receptor signaling protein activity;GO:0005089::Rho guanyl-nucleotide exchange factor activity;GO:0005634::nucleus;GO:0007165::signal transduction;GO:0035023::regulation of Rho protein signal transduction;GO:0043565::sequence-specific DNA binding
NC_037645.1	8263532	8264109	8263595;8263998;8263770;8264018	425	542	550	308	278	228	5.3889	7.03728	7.81869	4.29819	3.78045	3.96857	2.10009	2.74248	3.047	1.67504	1.47327	1.54658	0.748857	0.0567638	1	+	+	+	-	-	-	Exon (XM_026442522.1/100577280, exon 8 of 13)	8274418	8277937	3520	1	408969	#NAME?	-10309	GO:0004806::triglyceride lipase activity;GO:0006886::intracellular protein transport;GO:0008152::metabolic process;GO:0009405::pathogenesis;GO:0016042::lipid catabolic process;GO:0016192::vesicle-mediated transport;GO:0016787::hydrolase activity;GO:0019835::cytolysis;GO:0019867::outer membrane;GO:0030131::clathrin adaptor complex
NC_037645.1	8304165	8304566	8304296;8304300;8304307	640	561	535	349	241	275	8.10865	7.28352	7.60584	4.8685	3.2791	4.78308	4.54348	4.08114	4.26175	2.72795	1.83736	2.68008	0.830711	0.0114901	1	+	+	+	-	-	-	Exon (XM_006564615.2/408970, exon 8 of 10)	8301542	8312407	10866	2	408970	#NAME?	7841	GO:0003855::3-dehydroquinate dehydratase activity;GO:0019068::virion assembly
NC_037645.1	9774718	9775037	9774895;9774893;9774916	262	307	272	169	159	121	3.32695	3.99168	3.87387	2.3647	2.168	2.11426	2.34187	2.80978	2.72685	1.66453	1.52607	1.48825	0.751766	0.0102854	1	+	+	+	-	-	-	Promoter (<=1kb)	9764719	9774879	10161	2	408973	#NAME?	0	GO:0004222::metalloendopeptidase activity;GO:0006508::proteolysis;GO:0016020::membrane
NC_037646.1	12022140	12022527	12022294;12022292;12022305	1169	762	903	573	583	442	14.8005	9.88848	12.8278	7.98434	7.9132	7.67719	8.59233	5.74069	7.4471	4.63526	4.59396	4.45694	0.670295	0.0821452	1	+	+	+	-	-	-	Intron (XM_026443023.1/408976, intron 1 of 8)	12004649	12017591	12943	2	408976	#NAME?	-4549	GO:0004672::protein kinase activity;GO:0005198::structural molecule activity;GO:0005524::ATP binding;GO:0006468::protein phosphorylation;GO:0016020::membrane;GO:0016773::phosphotransferase activity, alcohol group as acceptor
NC_037646.1	12024137	12024706	12024325;12024589;12024314;12024590;12024326;12024602	1386	768	681	451	434	288	17.5455	9.96624	9.67758	6.28732	5.89425	5.00837	6.93358	3.93843	3.82436	2.4846	2.32927	1.97919	1.11332	0.119544	1	+	+	+	-	-	-	Intron (XM_026443023.1/408976, intron 1 of 8)	12004649	12028195	23547	2	408976	#NAME?	3489	GO:0004672::protein kinase activity;GO:0005198::structural molecule activity;GO:0005524::ATP binding;GO:0006468::protein phosphorylation;GO:0016020::membrane;GO:0016773::phosphotransferase activity, alcohol group as acceptor
NC_037646.1	12012902	12013172	12013073;12013062;12013073	481	436	385	236	205	138	6.0973	5.66352	5.47734	3.29667	2.7913	2.40887	5.06798	4.70743	4.55268	2.74014	2.32008	2.00221	1.02061	0.00121587	1	+	+	+	-	-	-	5' UTR	12004649	12017589	12941	2	408976	#NAME?	4417	GO:0004672::protein kinase activity;GO:0005198::structural molecule activity;GO:0005524::ATP binding;GO:0006468::protein phosphorylation;GO:0016020::membrane;GO:0016773::phosphotransferase activity, alcohol group as acceptor
NC_037646.1	11769183	11769409	11769284;11769291;11769295	558	478	474	430	363	375	7.07135	6.20784	6.74025	5.99521	4.9322	6.51608	7.01686	6.16001	6.68831	5.94901	4.8942	6.46587	0.198713	0.201226	1	+	+	+	-	-	-	Promoter (<=1kb)	11769248	11773945	4698	1	408983	#NAME?	0	GO:0006886::intracellular protein transport;GO:0006888::ER to Golgi vesicle-mediated transport;GO:0008270::zinc ion binding;GO:0030127::COPII vesicle coat
NC_037646.1	11039646	11040004	11039822;11039808;11039783	278	333	332	236	155	95	3.52935	4.32864	4.72527	3.29667	2.1138	1.66368	2.21445	2.71596	2.96482	2.06846	1.32628	1.04386	0.830877	0.0427575	1	+	+	+	-	-	-	Promoter (<=1kb)	11039245	11041058	1814	1	408990	#NAME?	401	GO:0035556::intracellular signal transduction
NC_037646.1	11040238	11040601	11040420;11040442;11040526	281	331	375	245	135	75	3.5673	4.30272	5.33544	3.42186	1.8428	1.31708	2.20752	2.66261	3.30168	2.11752	1.14036	0.815037	1.00459	0.055911	1	+	+	+	-	-	-	Promoter (<=1kb)	11039245	11041058	1814	1	408990	#NAME?	993	GO:0035556::intracellular signal transduction
NC_037646.1	11034775	11035366	11034943;11035346;11034948;11034957	350	336	476	252	194	119	4.44015	4.36752	6.76863	3.51923	2.64225	2.0796	1.68944	1.6618	2.57541	1.33904	1.00535	0.79127	0.918447	0.0702542	1	+	+	+	-	-	-	Exon (XM_016914089.2/408991, exon 10 of 12)	11039245	11041058	1814	1	408990	#NAME?	-3879	GO:0035556::intracellular signal transduction
NC_037646.1	10996153	10996465	10996297;10996313;10996320	277	228	282	189	182	150	3.5167	2.96784	4.01577	2.6429	2.47965	2.61683	2.5308	2.13581	2.88995	1.90197	1.78448	1.88321	0.440142	0.0894066	1	+	+	+	-	-	-	Promoter (<=1kb)	10996804	11009562	12759	1	408992	#NAME?	-339	GO:0002764::immune response-regulating signaling pathway;GO:0004190::aspartic-type endopeptidase activity;GO:0004408::holocytochrome-c synthase activity;GO:0005739::mitochondrion;GO:0008158::hedgehog receptor activity;GO:0008565::protein transporter activity;GO:0008883::glutamyl-tRNA reductase activity;GO:0015031::protein transport;GO:0016020::membrane;GO:0016021::integral component of membrane;G…
NC_037646.1	10997118	10997484	10997297;10997290;10997309	519	521	463	153	134	99	6.578	6.76512	6.58416	2.14214	1.82925	1.733	4.03733	4.15218	4.04111	1.31477	1.12273	1.06365	1.8046	6.49e-05	1	+	+	+	-	-	-	Promoter (<=1kb)	10996804	11009562	12759	1	408992	#NAME?	314	GO:0002764::immune response-regulating signaling pathway;GO:0004190::aspartic-type endopeptidase activity;GO:0004408::holocytochrome-c synthase activity;GO:0005739::mitochondrion;GO:0008158::hedgehog receptor activity;GO:0008565::protein transporter activity;GO:0008883::glutamyl-tRNA reductase activity;GO:0015031::protein transport;GO:0016020::membrane;GO:0016021::integral component of membrane;G…
NC_037646.1	9520227	9520513	9520375;9520378;9520386	218	306	276	146	166	93	2.77035	3.97872	3.93063	2.04477	2.26285	1.62902	2.1743	3.12268	3.08494	1.60483	1.77599	1.27853	0.847153	0.0395045	1	+	+	+	-	-	-	Distal Intergenic	9511443	9512568	1126	2	409002	NM_001174140.1	-7659	.
NC_037646.1	8839835	8840237	8839984;8839974;8839999	356	427	426	219	214	195	4.51605	5.54688	6.05913	3.0602	2.91325	3.39668	2.52418	3.10035	3.38666	1.71045	1.62832	1.89852	0.782895	0.0291978	1	+	+	+	-	-	-	3' UTR	8835312	8843959	8648	1	409004	#NAME?	4523	GO:0003924::GTPase activity;GO:0005525::GTP binding;GO:0007264::small GTPase mediated signal transduction;GO:0008948::oxaloacetate decarboxylase activity;GO:0015081::sodium ion transmembrane transporter activity;GO:0015093::ferrous iron transmembrane transporter activity;GO:0015684::ferrous iron transport;GO:0016020::membrane;GO:0016021::integral component of membrane;GO:0071436::sodium ion export
NC_037646.1	8827327	8827593	8827461;8827475;8827472	518	441	377	367	390	179	6.56535	5.72832	5.36382	5.11888	5.29805	3.1194	5.53877	4.83262	4.52511	4.31847	4.46963	2.63164	0.383444	0.178739	1	+	+	+	-	-	-	Intron (XM_006561832.3/409006, intron 1 of 7)	8803064	8832458	29395	2	409006	#NAME?	4865	.
NC_037646.1	8810972	8811295	8811101;8811111;8811146	340	366	365	172	195	108	4.31365	4.75632	5.19354	2.40643	2.6558	1.88897	2.99893	3.30668	3.61065	1.673	1.84636	1.31325	1.037	0.00210788	1	+	+	+	-	-	-	Intron (XM_392535.7/409006, intron 5 of 7)	8803064	8816501	13438	2	409006	#NAME?	5206	.
NC_037646.1	8721882	8722262	8722048;8722117;8722062	295	330	358	229	174	131	3.7444	4.28976	5.09421	3.1993	2.37125	2.28756	2.21373	2.53615	3.01175	1.89146	1.40191	1.35243	0.740434	0.026113	1	+	+	+	-	-	-	Intron (XM_006561820.3/409007, intron 4 of 12)	8707003	8765777	58775	1	409007	#NAME?	14879	GO:0000398::mRNA splicing, via spliceosome;GO:0000808::origin recognition complex;GO:0003677::DNA binding;GO:0003700::sequence-specific DNA binding transcription factor activity;GO:0003723::RNA binding;GO:0003779::actin binding;GO:0003917::DNA topoisomerase type I activity;GO:0004252::serine-type endopeptidase activity;GO:0005215::transporter activity;GO:0005634::nucleus;GO:0005694::chromosome;GO…
NC_037646.1	8708596	8708982	8708770;8708768;8708777	929	1050	851	817	769	501	11.7645	13.621	12.0899	11.3784	10.4335	8.69966	6.84745	7.92802	7.03685	6.62273	6.07275	5.06358	0.296588	0.0811259	1	+	+	+	-	-	-	Promoter (1-2kb)	8707003	8765777	58775	1	409007	#NAME?	1593	GO:0000398::mRNA splicing, via spliceosome;GO:0000808::origin recognition complex;GO:0003677::DNA binding;GO:0003700::sequence-specific DNA binding transcription factor activity;GO:0003723::RNA binding;GO:0003779::actin binding;GO:0003917::DNA topoisomerase type I activity;GO:0004252::serine-type endopeptidase activity;GO:0005215::transporter activity;GO:0005634::nucleus;GO:0005694::chromosome;GO…
NC_037646.1	8696515	8696842	8696643;8696687;8696640	188	278	291	185	175	96	2.39085	3.61584	4.14348	2.58726	2.3848	1.68101	1.64189	2.48314	2.8455	1.77678	1.63774	1.15442	0.609412	0.140232	1	+	+	+	-	-	-	Promoter (1-2kb)	8695001	8765777	70777	1	409007	#NAME?	1514	GO:0000398::mRNA splicing, via spliceosome;GO:0000808::origin recognition complex;GO:0003677::DNA binding;GO:0003700::sequence-specific DNA binding transcription factor activity;GO:0003723::RNA binding;GO:0003779::actin binding;GO:0003917::DNA topoisomerase type I activity;GO:0004252::serine-type endopeptidase activity;GO:0005215::transporter activity;GO:0005634::nucleus;GO:0005694::chromosome;GO…
NC_037646.1	8631392	8631741	8631553;8631558;8631565	338	426	456	176	152	133	4.28835	5.53392	6.48483	2.46207	2.07315	2.32222	2.75987	3.56149	4.17347	1.58452	1.33423	1.49452	1.24976	0.0349373	1	+	+	+	-	-	-	Promoter (<=1kb)	8630752	8632447	1696	1	409011	#NAME?	640	.
NC_037646.1	8559861	8560155	8559999;8560017;8559995	213	285	313	193	223	108	2.7071	3.70656	4.45566	2.69854	3.0352	1.88897	2.06704	2.83019	3.40217	2.0605	2.31756	1.44235	0.511886	0.160947	1	+	+	+	-	-	-	Intron (XM_006561508.3/409012, intron 1 of 19)	8554163	8606318	52156	1	409012	NM_001256039.1	5698	GO:0001104::RNA polymerase II transcription cofactor activity;GO:0003700::sequence-specific DNA binding transcription factor activity;GO:0005737::cytoplasm;GO:0006355::regulation of transcription, DNA-templated;GO:0006357::regulation of transcription from RNA polymerase II promoter;GO:0007275::multicellular organismal development;GO:0008092::cytoskeletal protein binding;GO:0016592::mediator compl…
NC_037646.1	8571386	8571747	8571663;8571607;8571653	220	228	206	179	173	113	2.79565	2.96784	2.93733	2.5038	2.3577	1.97562	1.73957	1.84671	1.82772	1.55796	1.46706	1.22931	0.347763	0.0468994	1	+	+	+	-	-	-	Intron (XM_006561508.3/409012, intron 2 of 19)	8554163	8606318	52156	1	409012	NM_001256039.1	17223	GO:0001104::RNA polymerase II transcription cofactor activity;GO:0003700::sequence-specific DNA binding transcription factor activity;GO:0005737::cytoplasm;GO:0006355::regulation of transcription, DNA-templated;GO:0006357::regulation of transcription from RNA polymerase II promoter;GO:0007275::multicellular organismal development;GO:0008092::cytoskeletal protein binding;GO:0016592::mediator compl…
NC_037646.1	6490515	6491114	6490682;6490702;6490736	318	472	481	262	289	200	4.03535	6.13008	6.83958	3.65833	3.9295	3.48333	1.51494	2.30134	2.5677	1.3734	1.47521	1.30771	0.619153	0.140172	1	+	+	+	-	-	-	Promoter (2-3kb)	6447414	6487656	40243	2	409018	#NAME?	-2859	GO:0001518::voltage-gated sodium channel complex;GO:0004888::transmembrane signaling receptor activity;GO:0005198::structural molecule activity;GO:0005216::ion channel activity;GO:0005248::voltage-gated sodium channel activity;GO:0005261::cation channel activity;GO:0005887::integral component of plasma membrane;GO:0006811::ion transport;GO:0006814::sodium ion transport;GO:0006935::chemotaxis;GO:0…
NC_037646.1	6520420	6520683	6520552;6520556;6520563	234	244	212	164	124	154	2.97275	3.1752	3.02247	2.29515	1.69375	2.68615	2.53642	2.70915	2.57884	1.95827	1.44515	2.29189	0.458209	0.0964285	1	+	+	+	-	-	-	Promoter (1-2kb)	6518555	6521961	3407	2	409019	#NAME?	1278	GO:0005886::plasma membrane;GO:0016020::membrane
NC_037646.1	5549970	5550657	5550126;5550489;5550134;5550433;5550113	726	904	979	481	422	293	9.19655	11.7288	13.9062	6.70462	5.73165	5.09502	3.01095	3.84	4.55288	2.19509	1.87654	1.66811	0.990463	0.0397932	1	+	+	+	-	-	-	Promoter (2-3kb)	5540266	5547250	6985	2	409022	#NAME?	-2720	GO:0005515::protein binding
NC_037646.1	5465694	5466125	5465942;5465892;5465966	418	405	448	358	237	226	5.30035	5.26176	6.37131	4.99369	3.2249	3.93391	2.76368	2.74356	3.32209	2.60378	1.68151	2.0512	0.47862	0.0714164	1	+	+	+	-	-	-	Promoter (1-2kb)	5461803	5463953	2151	2	409023	#NAME?	-1741	GO:0044237::cellular metabolic process
NC_037646.1	5472688	5472966	5472800;5472803;5472805	338	327	273	223	141	112	4.28835	4.25088	3.88806	3.11584	1.9241	1.95829	3.4622	3.43195	3.13903	2.51558	1.55342	1.58103	0.82845	0.0336454	1	+	+	+	-	-	-	Downstream (1-2kb)	5461803	5463953	2151	2	409023	#NAME?	-8735	GO:0044237::cellular metabolic process
NC_037646.1	5451982	5452243	5452109;5452118;5452128	236	232	204	125	90	145	2.99805	3.01968	2.90895	1.75266	1.23305	2.53018	2.57753	2.59613	2.50093	1.50683	1.0601	2.17529	0.69453	0.0933998	1	+	+	+	-	-	-	Intron (XM_026442658.1/409024, intron 1 of 10)	5237639	5460938	223300	2	409024	#NAME?	8695	GO:0005523::tropomyosin binding;GO:0009401::phosphoenolpyruvate-dependent sugar phosphotransferase system;GO:0051694::pointed-end actin filament capping
NC_037638.1	19564909	19565204	19565074;19565095;19565080	265	336	373	270	180	151	3.3649	4.36752	5.30706	3.76961	2.45255	2.63416	2.56063	3.32361	4.03858	2.86861	1.86635	2.00455	0.558107	0.121888	1	+	+	+	-	-	-	Exon (XM_006571158.3/409027, exon 13 of 13)	19561872	19570108	8237	2	409027	#NAME?	4904	GO:0005515::protein binding
NC_037639.1	15578579	15579708	15578690;15579101;15579467;15578713;15579000;15578690;15579458;15579465	1627	1974	2365	750	589	738	20.5942	25.596	33.5735	10.4464	7.9945	12.8069	4.10519	5.10223	6.69244	2.08235	1.5936	2.55289	1.35198	0.0378278	1	+	+	+	-	-	-	Exon (XM_026446479.1/409034, exon 6 of 7)	15570667	15587165	16499	2	409034	#NAME?	7457	GO:0003700::sequence-specific DNA binding transcription factor activity;GO:0005515::protein binding;GO:0005784::Sec61 translocon complex;GO:0006355::regulation of transcription, DNA-templated;GO:0006613::cotranslational protein targeting to membrane;GO:0006950::response to stress;GO:0009415::response to water;GO:0030176::integral component of endoplasmic reticulum membrane;GO:0042025::host cell n…
NC_037639.1	6378065	6378445	6378228;6378294;6378279	298	305	339	135	130	115	3.78235	3.96576	4.8246	1.89176	1.77505	2.01028	2.23616	2.3446	2.85235	1.11843	1.04943	1.1885	1.14707	0.015707	1	+	+	+	-	-	-	Exon (XM_006561125.3/409039, exon 6 of 11)	6369258	6374896	5639	2	409038	#NAME?	-3169	GO:0045454::cell redox homeostasis
NC_037639.1	6393881	6394195	6394030;6394036;6394030	264	352	322	144	141	111	3.35225	4.57488	4.58337	2.01695	1.9241	1.94096	2.39713	3.27142	3.27749	1.44228	1.37589	1.38795	1.08876	0.0320619	1	+	+	+	-	-	-	Distal Intergenic	6409564	6416225	6662	1	409040	#NAME?	-15369	GO:0005230::extracellular ligand-gated ion channel activity;GO:0006810::transport;GO:0006811::ion transport;GO:0016020::membrane
NC_037639.1	6407745	6408113	6407894;6407900;6407866	232	374	364	148	180	120	2.94745	4.86	5.17935	2.07259	2.45255	2.09693	1.79923	2.96672	3.16166	1.26518	1.49712	1.28004	0.971692	0.0888429	1	+	+	+	-	-	-	Promoter (1-2kb)	6409564	6416225	6662	1	409040	#NAME?	-1451	GO:0005230::extracellular ligand-gated ion channel activity;GO:0006810::transport;GO:0006811::ion transport;GO:0016020::membrane
NC_037639.1	6409095	6409681	6409512;6409521;6409563	302	474	483	202	270	138	3.83295	6.156	6.86796	2.82373	3.67205	2.40887	1.47083	2.36226	2.63546	1.08356	1.40908	0.924361	0.920709	0.0860116	1	+	+	+	-	-	-	Promoter (<=1kb)	6409564	6416225	6662	1	409040	#NAME?	0	GO:0005230::extracellular ligand-gated ion channel activity;GO:0006810::transport;GO:0006811::ion transport;GO:0016020::membrane
NC_037639.1	6405645	6406003	6405759;6405779;6405906	242	265	262	183	193	122	3.07395	3.44736	3.73197	2.55944	2.6287	2.13159	1.92872	2.16301	2.34159	1.60589	1.64935	1.33744	0.486223	0.0177627	1	+	+	+	-	-	-	Distal Intergenic	6409564	6416225	6662	1	409040	#NAME?	-3561	GO:0005230::extracellular ligand-gated ion channel activity;GO:0006810::transport;GO:0006811::ion transport;GO:0016020::membrane
NC_037650.1	7316034	7316359	7316193;7316196;7316209	296	372	405	177	198	126	3.75705	4.83408	5.76114	2.47598	2.69645	2.20091	2.59595	3.34013	3.98068	1.71079	1.86312	1.52073	0.960889	0.0495897	1	+	+	+	-	-	-	Exon (XM_392577.7/409050, exon 10 of 11)	7309450	7318914	9465	1	409050	#NAME?	6584	GO:0005515::protein binding;GO:0035556::intracellular signal transduction
NC_037647.1	4891574	4891844	4891699;4891699;4891704	259	246	248	80	61	70	3.289	3.20112	3.53331	1.12671	0.8401	1.23043	2.73376	2.66072	2.93683	0.936503	0.698278	1.02271	1.64848	0.000141155	1	+	+	+	-	-	-	Promoter (<=1kb)	4891339	4892750	1412	1	409057	#NAME?	235	.
NC_037647.1	4887214	4887522	4887345;4887334;4887343	271	271	247	140	161	149	3.4408	3.52512	3.51912	1.96131	2.1951	2.5995	2.50823	2.5697	2.56532	1.42973	1.60016	1.89495	0.63411	0.0199572	1	+	+	+	-	-	-	Promoter (<=1kb)	4887574	4892750	5177	1	409057	#NAME?	-52	.
NC_037638.1	22829900	22830247	22830089;22830098;22830098	218	360	400	131	104	112	2.77035	4.67856	5.69019	1.83612	1.42275	1.95829	1.79317	3.0283	3.6831	1.18847	0.920907	1.26755	1.33253	0.0861571	1	+	+	+	-	-	-	Distal Intergenic	22826779	22829233	2455	1	409062	#NAME?	3121	GO:0005515::protein binding;GO:0008144::drug binding
NC_037638.1	22834699	22834994	22834810;22834843;22834856	254	232	244	211	207	103	3.22575	3.01968	3.47655	2.94892	2.8184	1.80232	2.45474	2.29792	2.64559	2.24408	2.14475	1.37153	0.361025	0.177005	1	+	+	+	-	-	-	Distal Intergenic	22826779	22829233	2455	1	409062	#NAME?	7920	GO:0005515::protein binding;GO:0008144::drug binding
NC_037646.1	11396155	11396844	11396243;11396498;11396731;11396300;11396526;11396574	596	680	632	256	224	187	7.55205	8.82576	8.98227	3.57487	3.04875	3.25804	2.46537	2.88117	2.93227	1.16702	0.995266	1.06359	1.35973	0.0039892	1	+	+	+	-	-	-	Promoter (2-3kb)	11393806	11397116	3311	1	409073	#NAME?	2349	GO:0005337::nucleoside transmembrane transporter activity;GO:0006810::transport;GO:0016021::integral component of membrane
NC_037646.1	11394884	11395328	11395005;11395183;11395173;11395144	449	357	294	261	186	151	5.6925	4.63968	4.18605	3.64442	2.53385	2.63416	2.88144	2.34852	2.1189	1.84474	1.28259	1.33336	0.720254	0.0311735	1	+	+	+	-	-	-	Promoter (1-2kb)	11393806	11397116	3311	1	409073	#NAME?	1078	GO:0005337::nucleoside transmembrane transporter activity;GO:0006810::transport;GO:0016021::integral component of membrane
NC_037638.1	14733948	14734430	14734070;14734373;14734062;14734052;14734322	361	395	360	316	291	184	4.5793	5.13216	5.12259	4.40947	3.9566	3.20605	2.13559	2.39342	2.38896	2.05639	1.84519	1.49517	0.358259	0.0705811	1	+	+	+	-	-	-	Exon (XM_394949.6/411474, exon 5 of 5)	14735242	14738355	3114	2	409075	#NAME?	3925	GO:0003779::actin binding;GO:0007010::cytoskeleton organization;GO:0070836::caveola assembly
NC_037651.1	6616706	6617022	6616839;6616843;6616849	271	338	375	143	94	111	3.4408	4.39344	5.33544	2.00304	1.28725	1.94096	2.44493	3.12185	3.79121	1.4233	0.914682	1.37919	1.33199	0.026479	1	+	+	+	-	-	-	Promoter (<=1kb)	6616701	6626916	10216	1	409084	#NAME?	5	GO:0003700::sequence-specific DNA binding transcription factor activity;GO:0006355::regulation of transcription, DNA-templated;GO:0008270::zinc ion binding;GO:0043565::sequence-specific DNA binding
NC_037651.1	6618534	6618937	6618749;6618772;6618764	354	542	579	195	182	159	4.49075	7.03728	8.2302	2.72636	2.47965	2.7728	2.50383	3.92365	4.58876	1.52009	1.38253	1.54598	1.30821	0.0696696	1	+	+	+	-	-	-	Promoter (1-2kb)	6616701	6626916	10216	1	409084	#NAME?	1833	GO:0003700::sequence-specific DNA binding transcription factor activity;GO:0006355::regulation of transcription, DNA-templated;GO:0008270::zinc ion binding;GO:0043565::sequence-specific DNA binding
NC_037651.1	6619450	6620181	6619711;6620055;6619688;6619710;6620042;6620070	482	650	789	360	270	257	6.10995	8.43696	11.2101	5.02151	3.67205	4.47114	1.88015	2.59622	3.44957	1.54522	1.12996	1.37586	0.96829	0.0957809	1	+	+	+	-	-	-	Promoter (2-3kb)	6616701	6626916	10216	1	409084	#NAME?	2749	GO:0003700::sequence-specific DNA binding transcription factor activity;GO:0006355::regulation of transcription, DNA-templated;GO:0008270::zinc ion binding;GO:0043565::sequence-specific DNA binding
NC_037648.1	11838138	11838599	11838296;11838398;11838345	1035	1008	782	295	277	154	13.1054	13.0766	11.1108	4.11736	3.7669	2.68615	6.38962	6.37558	5.41714	2.00744	1.83657	1.30965	1.81887	0.000768139	1	+	+	+	-	-	-	3' UTR	11837344	11853959	16616	2	409095	#NAME?	15360	GO:0008270::zinc ion binding
NC_037648.1	11852818	11853105	11852939;11852952;11852974	1789	1459	1070	785	923	503	22.6435	18.9216	15.1975	10.9333	12.5202	8.73432	17.71	14.799	11.8863	8.55116	9.79231	6.8313	0.818426	0.043153	1	+	+	+	-	-	-	Promoter (<=1kb)	11837344	11853959	16616	2	409095	#NAME?	854	GO:0008270::zinc ion binding
NC_037648.1	15118192	15118549	15118353;15118340;15118361	226	314	390	129	123	140	2.87155	4.0824	5.54829	1.8083	1.6802	2.44353	1.80676	2.56862	3.49094	1.13777	1.05717	1.53745	1.07559	0.0948228	1	+	+	+	-	-	-	Exon (XM_006566707.3/409099, exon 23 of 36)	15110433	15124106	13674	1	409099	#NAME?	7759	GO:0003723::RNA binding;GO:0003779::actin binding;GO:0003964::RNA-directed DNA polymerase activity;GO:0004842::ubiquitin-protein transferase activity;GO:0005198::structural molecule activity;GO:0006886::intracellular protein transport;GO:0008277::regulation of G-protein coupled receptor protein signaling pathway;GO:0008565::protein transporter activity;GO:0016021::integral component of membrane;G…
NC_037645.1	7321289	7321727	7321543;7321578;7321560	272	334	440	169	120	138	3.45345	4.3416	6.25779	2.3647	1.63955	2.40887	1.77197	2.22767	3.21087	1.21333	0.841253	1.23599	1.13176	0.0807641	1	+	+	+	-	-	-	Exon (XM_006564524.3/409122, exon 6 of 7)	7319351	7332166	12816	2	409122	#NAME?	10439	.
NC_037640.1	4405809	4406056	4405934;4405932;4405935	210	268	238	172	133	110	2.66915	3.48624	3.39141	2.40643	1.8157	1.92363	2.42431	3.16645	3.08031	2.18569	1.64915	1.74717	0.635426	0.0274529	1	+	+	+	-	-	-	Promoter (<=1kb)	4406906	4408685	1780	1	409132	#NAME?	-850	GO:0035091::phosphatidylinositol binding
NC_037644.1	186268	186576	186422;186420;186442	1240	633	518	569	537	650	15.6986	8.21664	7.36461	7.9287	7.2899	11.2818	11.4438	5.98966	5.36856	5.77976	5.3141	8.22406	0.239219	0.625619	1	+	+	+	-	-	-	Intron (XM_006557638.3/409158, intron 1 of 7)	177420	182183	4764	2	409158	#NAME?	-4085	GO:0004616::phosphogluconate dehydrogenase (decarboxylating) activity;GO:0006506::GPI anchor biosynthetic process;GO:0008152::metabolic process;GO:0016021::integral component of membrane;GO:0016616::oxidoreductase activity, acting on the CH-OH group of donors, NAD or NADP as acceptor;GO:0017176::phosphatidylinositol N-acetylglucosaminyltransferase activity;GO:0051287::NAD binding;GO:0055114::oxid…
NC_037648.1	10426310	10426590	10426460;10426444;10426469	236	242	296	100	70	66	2.99805	3.14928	4.21443	1.40491	0.96205	1.16111	2.40325	2.52448	3.37831	1.12618	0.771184	0.930751	1.55432	0.0187169	1	+	+	+	-	-	-	Promoter (1-2kb)	10428307	10450428	22122	1	409171	#NAME?	-1717	GO:0006508::proteolysis;GO:0008152::metabolic process;GO:0008236::serine-type peptidase activity;GO:0016787::hydrolase activity
NC_037648.1	10443563	10443847	10443717;10443732;10443798	223	197	254	131	112	137	2.8336	2.56608	3.61845	1.83612	1.53115	2.39154	2.23955	2.02811	2.85986	1.45118	1.21015	1.89016	0.647058	0.0575554	1	+	+	+	-	-	-	Promoter (2-3kb)	10441213	10450447	9235	1	409171	#NAME?	2350	GO:0006508::proteolysis;GO:0008152::metabolic process;GO:0008236::serine-type peptidase activity;GO:0016787::hydrolase activity
NC_037651.1	5503879	5504133	5504009;5504006;5504008	312	244	232	162	156	110	3.95945	3.1752	3.30627	2.26733	2.12735	1.92363	3.49753	2.80477	2.92055	2.00282	1.87917	1.69921	0.724638	0.018192	1	+	+	+	-	-	-	Promoter (<=1kb)	5504751	5519983	15233	1	409177	#NAME?	-618	GO:0004672::protein kinase activity;GO:0005515::protein binding;GO:0006468::protein phosphorylation
NC_037651.1	5514351	5514647	5514481;5514505;5514484	242	258	280	91	93	91	3.07395	3.35664	3.98739	1.27972	1.2737	1.59436	2.33135	2.54574	3.02412	0.970566	0.966	1.2092	1.32866	0.00872447	1	+	+	+	-	-	-	Exon (XM_026445164.1/409177, exon 12 of 23)	5506728	5519983	13256	1	409177	#NAME?	7623	GO:0004672::protein kinase activity;GO:0005515::protein binding;GO:0006468::protein phosphorylation
NC_037652.1	1483194	1483897	1483498;1483524;1483531	378	499	592	290	274	229	4.79435	6.48	8.41467	4.04781	3.72625	3.9859	1.53399	2.07333	2.69235	1.29513	1.19225	1.27532	0.743508	0.126127	1	+	+	+	-	-	-	3' UTR	1434142	1470719	36578	2	409185	#NAME?	-12475	.
NC_037645.1	2157221	2157520	2157350;2157355;2157364	384	452	410	214	172	179	4.87025	5.87088	5.83209	2.99065	2.34415	3.1194	3.65676	4.40807	4.37894	2.24549	1.76007	2.34216	0.971114	0.00355557	1	+	+	+	-	-	-	Exon (XM_006559431.3/409196, exon 2 of 5)	2153796	2160013	6218	1	409196	#NAME?	3425	GO:0009058::biosynthetic process;GO:0030170::pyridoxal phosphate binding
NC_037642.1	13305985	13306297	13306164;13306166;13306169	502	513	434	386	323	268	6.36295	6.66144	6.17265	5.38317	4.3902	4.66177	4.57911	4.79391	4.44216	3.87401	3.15941	3.35485	0.411299	0.0186446	1	+	+	+	-	-	-	Promoter (2-3kb)	13303009	13325210	22202	1	409207	#NAME?	2976	GO:0008033::tRNA processing;GO:0016021::integral component of membrane;GO:0016620::oxidoreductase activity, acting on the aldehyde or oxo group of donors, NAD or NADP as acceptor;GO:0051287::NAD binding;GO:0055114::oxidation-reduction process
NC_037642.1	13307923	13308221	13308070;13308067;13308067	637	470	486	409	327	310	8.0707	6.10416	6.91053	5.7031	4.4444	5.38963	6.08004	4.59855	5.20603	4.29642	3.34818	4.06026	0.440524	0.0629068	1	+	+	+	-	-	-	Intron (XM_006570187.2/409207, intron 1 of 6)	13303009	13325210	22202	1	409207	#NAME?	4914	GO:0008033::tRNA processing;GO:0016021::integral component of membrane;GO:0016620::oxidoreductase activity, acting on the aldehyde or oxo group of donors, NAD or NADP as acceptor;GO:0051287::NAD binding;GO:0055114::oxidation-reduction process
NC_037644.1	8380863	8381220	8381058;8381024;8381080	280	328	324	175	205	112	3.55465	4.26384	4.61175	2.44816	2.7913	1.95829	2.23656	2.68278	2.90168	1.54036	1.75626	1.23214	0.788236	0.0130638	1	+	+	+	-	-	-	Intron (XM_006562570.3/409212, intron 1 of 28)	8139228	8394435	255208	2	409212	#NAME?	13215	GO:0005509::calcium ion binding;GO:0007156::homophilic cell adhesion via plasma membrane adhesion molecules;GO:0016020::membrane
NC_037646.1	7871105	7871454	7871307;7871295;7871304	275	383	426	165	116	124	3.4914	4.97664	6.05913	2.30906	1.58535	2.16625	2.24697	3.20284	3.8995	1.48605	1.02029	1.39414	1.26121	0.0531295	1	+	+	+	-	-	-	Promoter (1-2kb)	7869276	7875348	6073	1	409217	#NAME?	1829	GO:0005089::Rho guanyl-nucleotide exchange factor activity;GO:0005515::protein binding;GO:0035023::regulation of Rho protein signal transduction
NC_037650.1	7371581	7371953	7371779;7371789;7371757	425	452	453	397	347	260	5.3889	5.87088	6.44226	5.53618	4.7154	4.52313	3.2543	3.54536	3.89041	3.34324	2.84758	2.73147	0.260786	0.0883134	1	+	+	+	-	-	-	Distal Intergenic	7375352	7381521	6170	2	409230	#NAME?	9568	GO:0005096::GTPase activator activity;GO:0005515::protein binding;GO:0005737::cytoplasm
NC_037639.1	9524220	9524608	9524454;9524464;9524455	247	264	290	146	117	83	3.1372	3.4344	4.12929	2.04477	1.5989	1.45572	1.8166	1.98869	2.39107	1.18403	0.925845	0.842936	1.06933	0.00959589	1	+	+	+	-	-	-	3' UTR	9518413	9524654	6242	1	409246	#NAME?	5807	GO:0003700::sequence-specific DNA binding transcription factor activity;GO:0004672::protein kinase activity;GO:0005524::ATP binding;GO:0005634::nucleus;GO:0006355::regulation of transcription, DNA-templated;GO:0006468::protein phosphorylation;GO:0008270::zinc ion binding;GO:0016020::membrane;GO:0016773::phosphotransferase activity, alcohol group as acceptor;GO:0043401::steroid hormone mediated si…
NC_037640.1	8151591	8152073	8151857;8151867;8151884	476	534	598	226	188	134	6.03405	6.9336	8.49981	3.15757	2.56095	2.33955	2.81403	3.23354	3.96395	1.47256	1.19432	1.09107	1.41365	0.0168459	1	+	+	+	-	-	-	3' UTR	8146327	8152378	6052	1	409255	#NAME?	5264	GO:0004674::protein serine/threonine kinase activity;GO:0005089::Rho guanyl-nucleotide exchange factor activity;GO:0005096::GTPase activator activity;GO:0005515::protein binding;GO:0006468::protein phosphorylation;GO:0007165::signal transduction;GO:0035023::regulation of Rho protein signal transduction
NC_037638.1	12413602	12413955	12413756;12413804;12413826	284	260	252	161	142	160	3.60525	3.38256	3.59007	2.25342	1.93765	2.79013	2.29403	2.15233	2.28437	1.43386	1.23293	1.77537	0.599504	0.0323241	1	+	+	+	-	-	-	Promoter (<=1kb)	12413486	12416084	2599	1	409259	#NAME?	116	GO:0000150::recombinase activity;GO:0003677::DNA binding;GO:0004803::transposase activity;GO:0005515::protein binding;GO:0006310::DNA recombination;GO:0006313::transposition, DNA-mediated;GO:0016491::oxidoreductase activity;GO:0030151::molybdenum ion binding;GO:0055114::oxidation-reduction process
NC_037643.1	12139705	12139990	12139834;12139854;12139862	250	390	349	158	158	141	3.17515	5.06736	4.9665	2.21169	2.15445	2.46086	2.50072	3.991	3.91157	1.74191	1.69682	1.93815	0.952199	0.0710956	1	+	+	+	-	-	-	Exon (XM_026441514.1/410159, exon 13 of 17)	12144769	12147912	3144	2	409263	#NAME?	7922	GO:0006486::protein glycosylation;GO:0008378::galactosyltransferase activity;GO:0016020::membrane;GO:0016757::transferase activity, transferring glycosyl groups
NC_037643.1	12143806	12144074	12143950;12143955;12143960	237	276	239	181	160	130	3.0107	3.58992	3.4056	2.53162	2.18155	2.27023	2.52105	3.00607	2.85173	2.11989	1.82675	1.90101	0.518896	0.0118328	1	+	+	+	-	-	-	3' UTR	12144769	12147912	3144	2	409263	#NAME?	3838	GO:0006486::protein glycosylation;GO:0008378::galactosyltransferase activity;GO:0016020::membrane;GO:0016757::transferase activity, transferring glycosyl groups
NC_037643.1	12135535	12135940	12135708;12135711;12135718	285	418	585	170	109	138	3.6179	5.43024	8.31534	2.37861	1.4905	2.40887	2.00723	3.01273	4.61339	1.31967	0.826937	1.33645	1.46768	0.107852	1	+	+	+	-	-	-	Exon (XM_026441514.1/410159, exon 7 of 17)	12144769	12147912	3144	2	409263	#NAME?	11972	GO:0006486::protein glycosylation;GO:0008378::galactosyltransferase activity;GO:0016020::membrane;GO:0016757::transferase activity, transferring glycosyl groups
NC_037646.1	284046	284416	284209;284212;284212	268	280	342	121	99	58	3.40285	3.64176	4.86717	1.69702	1.355	1.02247	2.06602	2.21108	2.95508	1.03034	0.822682	0.620788	1.5477	0.016888	1	+	+	+	-	-	-	Promoter (2-3kb)	277110	286945	9836	2	409268	#NAME?	2529	GO:0005515::protein binding;GO:0005576::extracellular region;GO:0005672::transcription factor TFIIA complex;GO:0005856::cytoskeleton;GO:0006367::transcription initiation from RNA polymerase II promoter;GO:0007165::signal transduction;GO:0016021::integral component of membrane;GO:0042381::hemolymph coagulation
NC_037652.1	5185978	5186323	5186152;5186149;5186126	295	340	394	161	147	117	3.7444	4.41936	5.60505	2.25342	2.0054	2.04494	2.43766	2.87707	3.64897	1.46701	1.30554	1.33128	1.12712	0.0421995	1	+	+	+	-	-	-	Exon (XM_392789.6/409270, exon 6 of 10)	5181313	5183512	2200	1	409269	#NAME?	4665	GO:0004190::aspartic-type endopeptidase activity;GO:0006508::proteolysis
NC_037645.1	6517503	6517811	6517658;6517671;6517666	277	361	414	164	128	108	3.5167	4.69152	5.88885	2.29515	1.74795	1.88897	2.56356	3.41996	4.29278	1.67309	1.2742	1.377	1.24879	0.051067	1	+	+	+	-	-	-	Exon (XM_006563804.3/409273, exon 4 of 5)	6509523	6519744	10222	1	409273	#NAME?	7980	GO:0005272::sodium channel activity;GO:0005515::protein binding;GO:0006814::sodium ion transport;GO:0015099::nickel cation transmembrane transporter activity;GO:0016020::membrane;GO:0016021::integral component of membrane;GO:0035444::nickel cation transmembrane transport;GO:0046872::metal ion binding
NC_037638.1	15098481	15098698	15098586;15098591;15098592	803	690	507	405	480	546	10.1706	8.95536	7.20852	5.64746	6.51755	9.47951	10.5089	9.25322	7.44828	5.8353	6.73433	9.79481	0.282951	0.344536	1	+	+	+	-	-	-	Promoter (<=1kb)	15090601	15097846	7246	2	409282	#NAME?	-635	GO:0008270::zinc ion binding;GO:0046872::metal ion binding
NC_037638.1	25018240	25018615	25018392;25018408;25018401	810	470	384	158	162	130	10.2591	6.10416	5.46315	2.21169	2.20865	2.27023	6.14593	3.65683	3.27282	1.32496	1.32314	1.36003	1.70587	0.0784422	1	+	+	+	-	-	-	Intron (XM_006571490.3/409288, intron 2 of 3)	25012340	25028539	16200	1	409288	#NAME?	5900	GO:0004672::protein kinase activity;GO:0005524::ATP binding;GO:0006468::protein phosphorylation
NC_037651.1	6009417	6010025	6009512;6009846;6009522;6009880;6009874	652	518	396	122	126	100	8.26045	6.72624	5.63343	1.71093	1.72085	1.75033	3.05529	2.48783	2.08364	0.632822	0.636491	0.647395	1.99244	0.0212047	1	+	+	+	-	-	-	Promoter (2-3kb)	6005098	6012918	7821	2	409299	#NAME?	2893	GO:0004019::adenylosuccinate synthase activity;GO:0005525::GTP binding;GO:0006164::purine nucleotide biosynthetic process
NC_037651.1	6772563	6772884	6772718;6772745;6772735	380	296	294	88	152	126	4.81965	3.84912	4.18605	1.23799	2.07315	2.20091	3.37152	2.6926	2.9283	0.86602	1.45024	1.53962	1.22165	0.00417533	1	+	+	+	-	-	-	Intron (XM_026444972.1/409300, intron 2 of 6)	6767394	6780736	13343	2	409300	#NAME?	7852	GO:0003677::DNA binding;GO:0003700::sequence-specific DNA binding transcription factor activity;GO:0006355::regulation of transcription, DNA-templated;GO:0007049::cell cycle;GO:0019031::viral envelope;GO:0031412::gas vesicle organization
NC_037645.1	6527475	6527883	6527753;6527742;6527785	292	374	437	190	107	163	3.70645	4.86	6.21522	2.65681	1.4634	2.84212	2.04127	2.67658	3.42294	1.4632	0.805947	1.56526	1.08617	0.0481322	1	+	+	+	-	-	-	Promoter (<=1kb)	6523903	6528419	4517	2	409303	#NAME?	536	GO:0004842::ubiquitin-protein transferase activity;GO:0005515::protein binding;GO:0008270::zinc ion binding;GO:0016567::protein ubiquitination;GO:0016702::oxidoreductase activity, acting on single donors with incorporation of molecular oxygen, incorporation of two atoms of oxygen;GO:0046872::metal ion binding;GO:0055114::oxidation-reduction process
NC_037645.1	6525474	6526286	6525715;6525729;6526095;6526112;6526086	430	498	522	321	243	151	5.45215	6.46704	7.42137	4.47902	3.3062	2.63416	1.51058	1.79177	2.05617	1.24096	0.91602	0.729824	0.89236	0.019277	1	+	+	+	-	-	-	Promoter (2-3kb)	6523903	6528419	4517	2	409303	#NAME?	2133	GO:0004842::ubiquitin-protein transferase activity;GO:0005515::protein binding;GO:0008270::zinc ion binding;GO:0016567::protein ubiquitination;GO:0016702::oxidoreductase activity, acting on single donors with incorporation of molecular oxygen, incorporation of two atoms of oxygen;GO:0046872::metal ion binding;GO:0055114::oxidation-reduction process
NC_037643.1	15386063	15386563	15386415;15386171;15386415;15386412	2547	1543	1163	359	231	181	32.2322	20.0102	16.5172	5.0076	3.1436	3.15406	14.4917	8.99664	7.42618	2.25143	1.41337	1.41807	2.60457	0.054464	1	+	+	+	-	-	-	Exon (XM_003251552.4/100577168, exon 4 of 6)	15380575	15407415	26841	1	409305	#NAME?	5488	GO:0003924::GTPase activity;GO:0005525::GTP binding
NC_037641.1	419348	419754	419506;419543;419533	466	403	372	161	115	132	5.90755	5.23584	5.29287	2.25342	1.5718	2.30489	3.26949	2.89773	2.9293	1.24714	0.8699	1.27562	1.4229	0.000443975	1	+	+	+	-	-	-	Intron (XM_392824.6/409306, intron 6 of 7)	416774	430011	13238	2	409306	#NAME?	10257	GO:0003824::catalytic activity;GO:0008152::metabolic process
NC_037641.1	5406206	5406468	5406325;5406336;5406350	216	260	246	129	79	108	2.74505	3.38256	3.50493	1.8083	1.084	1.88897	2.35105	2.89705	3.00186	1.54875	0.92841	1.61784	1.01052	0.00982873	1	+	+	+	-	-	-	Promoter (<=1kb)	5398579	5406544	7966	2	409316	#NAME?	76	GO:0003723::RNA binding;GO:0005515::protein binding
NC_037652.1	6559094	6559473	6559282;6559280;6559294	362	539	583	227	196	185	4.59195	6.9984	8.28696	3.17148	2.66935	3.22338	2.72195	4.14841	4.91222	1.87994	1.5823	1.91071	1.13287	0.0759864	1	+	+	+	-	-	-	Promoter (1-2kb)	6556135	6560664	4530	2	409321	#NAME?	1191	GO:0003677::DNA binding;GO:0005622::intracellular;GO:0005789::endoplasmic reticulum membrane;GO:0006355::regulation of transcription, DNA-templated;GO:0019013::viral nucleocapsid
NC_037640.1	6123186	6123497	6123346;6123345;6123353	234	262	282	139	92	84	2.97275	3.40848	4.01577	1.9474	1.26015	1.47305	2.1462	2.46078	2.89922	1.40594	0.909775	1.06348	1.1514	0.00915777	1	+	+	+	-	-	-	Promoter (1-2kb)	6121259	6124972	3714	2	409335	#NAME?	1475	GO:0006505::GPI anchor metabolic process;GO:0006629::lipid metabolic process;GO:0006886::intracellular protein transport;GO:0009058::biosynthetic process;GO:0016788::hydrolase activity, acting on ester bonds
NC_037641.1	707280	707548	707438;707428;707406	214	237	214	106	131	96	2.71975	3.08448	3.05085	1.48837	1.7886	1.68101	2.27742	2.58283	2.55467	1.24631	1.49771	1.40762	0.836753	0.00121589	1	+	+	+	-	-	-	Distal Intergenic	719443	746353	26911	1	409337	#NAME?	-11895	GO:0008270::zinc ion binding
NC_037641.1	709388	709692	709539;709544;709549	458	342	300	174	152	156	5.80635	4.44528	4.27119	2.43425	2.07315	2.72081	4.28815	3.28296	3.15439	1.79776	1.53108	2.00939	1.00661	0.0255813	1	+	+	+	-	-	-	Distal Intergenic	719443	746353	26911	1	409337	#NAME?	-9751	GO:0008270::zinc ion binding
NC_037640.1	4901782	4902067	4901920;4901948;4901947	249	224	210	177	154	155	3.1625	2.916	2.99409	2.47598	2.10025	2.70348	2.49075	2.29661	2.35812	1.95006	1.65414	2.12924	0.317633	0.0606153	1	+	+	+	-	-	-	Promoter (<=1kb)	4877313	4901935	24623	2	409346	#NAME?	0	GO:0005515::protein binding;GO:0016021::integral component of membrane
NC_037640.1	4873806	4874279	4873911;4874194;4873910;4873905;4874187	330	310	326	196	152	160	4.18715	4.03056	4.64013	2.74027	2.07315	2.79013	1.98979	1.91537	2.20505	1.30221	0.985187	1.32591	0.757903	0.00472784	1	+	+	+	-	-	-	Promoter (2-3kb)	4871101	4875542	4442	1	409347	#NAME?	2705	GO:0000221::vacuolar proton-transporting V-type ATPase, V1 domain;GO:0000398::mRNA splicing, via spliceosome;GO:0015991::ATP hydrolysis coupled proton transport;GO:0016820::hydrolase activity, acting on acid anhydrides, catalyzing transmembrane movement of substances
NC_037645.1	11846545	11846921	11846814;11846851;11846800	258	260	288	161	114	110	3.27635	3.38256	4.10091	2.25342	1.55825	1.92363	1.95756	2.02102	2.45022	1.34638	0.931027	1.14934	0.907713	0.00813278	1	+	+	+	-	-	-	Promoter (<=1kb)	11842950	11847665	4716	2	409353	#NAME?	744	GO:0005515::protein binding
NC_037647.1	8714677	8715153	8714825;8715018;8714999	887	695	669	518	532	433	11.2332	9.02016	9.5073	7.21929	7.22215	7.52122	5.30459	4.25954	4.48958	3.40912	3.41047	3.5517	0.438354	0.0577826	1	+	+	+	-	-	-	Promoter (<=1kb)	8715013	8724139	9127	1	409361	#NAME?	0	GO:0006051::N-acetylmannosamine metabolic process;GO:0008080::N-acetyltransferase activity;GO:0016021::integral component of membrane;GO:0016032::viral process;GO:0016192::vesicle-mediated transport;GO:0047465::N-acylglucosamine-6-phosphate 2-epimerase activity
NC_037645.1	7718227	7718503	7718372;7718364;7718362	274	272	250	167	127	148	3.47875	3.53808	3.56169	2.33688	1.7344	2.58217	2.82885	2.8771	2.8963	1.9003	1.41038	2.09977	0.668963	0.0340485	1	+	+	+	-	-	-	Promoter (<=1kb)	7715164	7718418	3255	2	409367	#NAME?	0	GO:0005509::calcium ion binding;GO:0005515::protein binding;GO:0005578::proteinaceous extracellular matrix;GO:0007165::signal transduction
NC_037645.1	2170290	2170690	2170519;2170562;2170563	255	336	339	182	95	76	3.2384	4.36752	4.8246	2.54553	1.3008	1.33441	1.81908	2.45334	2.71009	1.42988	0.730689	0.749569	1.26266	0.0186554	1	+	+	+	-	-	-	Promoter (<=1kb)	2169329	2176600	7272	1	409370	#NAME?	961	GO:0005086::ARF guanyl-nucleotide exchange factor activity;GO:0032012::regulation of ARF protein signal transduction;GO:0035064::methylated histone binding
NC_037645.1	2195510	2195755	2195632;2195643;2195644	228	261	247	91	75	90	2.89685	3.39552	3.51912	1.27972	1.0298	1.57703	2.65251	3.10912	3.2223	1.17178	0.94294	1.44401	1.33598	0.00152845	1	+	+	+	-	-	-	Promoter (<=1kb)	2187253	2195465	8213	2	409372	NM_001012615.1	-45	GO:0051424::corticotropin-releasing hormone binding
NC_037642.1	7455691	7456013	7455852;7455869;7455869	237	356	484	162	99	93	3.0107	4.62672	6.88215	2.26733	1.355	1.62902	2.09958	3.22654	4.79941	1.58117	0.944938	1.13603	1.46724	0.103326	1	+	+	+	-	-	-	Exon (XR_409930.3/409382, exon 5 of 26)	7448183	7460247	12065	2	409382	#NAME?	4234	GO:0004842::ubiquitin-protein transferase activity
NC_037638.1	5579475	5579717	5579586;5579603;5579607	291	260	230	223	217	167	3.6938	3.38256	3.27789	3.11584	2.9539	2.91144	3.424	3.13549	3.03847	2.88825	2.73814	2.69878	0.205246	0.0478993	1	+	+	+	-	-	-	Intron (XM_026444920.1/409383, intron 3 of 9)	5492939	5585789	92851	2	409383	#NAME?	6072	GO:0004222::metalloendopeptidase activity;GO:0006508::proteolysis;GO:0008270::zinc ion binding;GO:0031012::extracellular matrix
NC_037638.1	5622331	5622567	5622430;5622442;5622430	204	222	226	106	82	100	2.59325	2.89008	3.22113	1.48837	1.12465	1.75033	2.46469	2.74681	3.06144	1.41459	1.0689	1.66356	0.996319	0.00486095	1	+	+	+	-	-	-	Promoter (<=1kb)	5492939	5623536	130598	2	409383	#NAME?	969	GO:0004222::metalloendopeptidase activity;GO:0006508::proteolysis;GO:0008270::zinc ion binding;GO:0031012::extracellular matrix
NC_037644.1	5877587	5877959	5877810;5877785;5877790	237	384	326	137	114	136	3.0107	4.9896	4.64013	1.91958	1.55825	2.37421	1.81813	3.01317	2.80213	1.15921	0.941011	1.43376	1.11103	0.0509776	1	+	+	+	-	-	-	Promoter (1-2kb)	5875772	5879187	3416	1	409386	#NAME?	1815	GO:0005515::protein binding;GO:0006464::cellular protein modification process;GO:0015031::protein transport
NC_037651.1	10662420	10662754	10662575;10662578;10662587	210	652	539	109	100	105	2.66915	8.46288	7.6626	1.5301	1.36855	1.83698	1.79471	5.69036	5.15226	1.02883	0.9202	1.23517	1.98869	0.121864	1	+	+	+	-	-	-	Distal Intergenic	10651963	10653206	1244	2	409405	#NAME?	-9214	GO:0005634::nucleus;GO:0007155::cell adhesion;GO:0008270::zinc ion binding;GO:0016021::integral component of membrane;GO:0042246::tissue regeneration
NC_037646.1	11402803	11403545	11402917;11403234;11403229;11403253	1333	993	799	460	599	496	16.8751	12.8822	11.352	6.41251	8.13	8.61301	5.11592	3.90542	3.44152	1.94404	2.46472	2.61115	0.828109	0.052491	1	+	+	+	-	-	-	Promoter (2-3kb)	11401222	11406163	4942	2	409409	#NAME?	2618	GO:0004672::protein kinase activity;GO:0005524::ATP binding;GO:0006468::protein phosphorylation;GO:0016020::membrane;GO:0016773::phosphotransferase activity, alcohol group as acceptor;GO:0046983::protein dimerization activity
NC_037646.1	12340071	12340351	12340201;12340205;12340211	332	250	234	164	133	102	4.21245	3.25296	3.33465	2.29515	1.8157	1.78499	3.37672	2.60759	2.67307	1.8398	1.45547	1.43086	0.87327	0.0174565	1	+	+	+	-	-	-	Promoter (<=1kb)	12338624	12340146	1523	2	409420	#NAME?	0	GO:0005507::copper ion binding
NC_037643.1	5220295	5220682	5220480;5220463;5220468	288	322	361	191	164	184	3.65585	4.18608	5.13678	2.67072	2.23575	3.20605	2.12238	2.4302	2.98212	1.55047	1.29795	1.86125	0.677925	0.0429929	1	+	+	+	-	-	-	Intron (XM_006561271.3/412099, intron 3 of 8)	5235510	5242327	6818	1	409425	#NAME?	-14828	GO:0003810::protein-glutamine gamma-glutamyltransferase activity;GO:0018149::peptide cross-linking
NC_037643.1	5345859	5346089	5345974;5345964;5345984	208	224	226	92	126	92	2.64385	2.916	3.22113	1.29363	1.72085	1.61169	2.57805	2.84343	3.14096	1.26143	1.67802	1.57158	0.924564	0.00343802	1	+	+	+	-	-	-	Exon (XM_026441271.1/411496, exon 19 of 26)	5322657	5341371	18715	2	409448	#NAME?	-4488	GO:0003677::DNA binding;GO:0005578::proteinaceous extracellular matrix;GO:0007275::multicellular organismal development
NC_037647.1	11847629	11847990	11847859;11847849;11847834	258	301	274	196	133	125	3.27635	3.91392	3.90225	2.74027	1.8157	2.18358	2.03868	2.4354	2.42814	1.70511	1.1298	1.35871	0.718863	0.014812	1	+	+	+	-	-	-	Promoter (<=1kb)	11845379	11848916	3538	2	409460	#NAME?	926	GO:0000103::sulfate assimilation;GO:0004020::adenylylsulfate kinase activity;GO:0004781::sulfate adenylyltransferase (ATP) activity;GO:0005524::ATP binding;GO:0008152::metabolic process;GO:0016301::kinase activity;GO:0098519::nucleotide phosphatase activity, acting on free nucleotides
NC_037638.1	5294449	5294780	5294644;5294676;5294667	250	285	210	206	203	184	3.17515	3.70656	2.99409	2.87937	2.7642	3.20605	2.15423	2.51478	2.03139	1.95356	1.87542	2.1752	0.158282	0.258335	1	+	+	+	-	-	-	Exon (XM_006562770.3/409468, exon 6 of 18)	5290683	5311087	20405	1	409468	#NAME?	3766	GO:0004222::metalloendopeptidase activity;GO:0006508::proteolysis;GO:0008270::zinc ion binding;GO:0031012::extracellular matrix
NC_037653.1	2833666	2834000	2833814;2833808;2833806	403	270	230	190	145	130	5.1106	3.51216	3.27789	2.65681	1.9783	2.27023	3.43632	2.36154	2.20402	1.78641	1.33019	1.52648	0.785256	0.0891032	1	+	+	+	-	-	-	Promoter (1-2kb)	2831275	2835153	3879	2	409469	NM_001040233.1	1153	GO:0005506::iron ion binding;GO:0016705::oxidoreductase activity, acting on paired donors, with incorporation or reduction of molecular oxygen;GO:0020037::heme binding;GO:0043087::regulation of GTPase activity;GO:0055114::oxidation-reduction process
NC_037648.1	7144622	7145151	7144962;7144955;7144945	694	1008	1126	430	286	380	8.79175	13.0766	15.9921	5.99521	3.88885	6.60273	3.73651	5.55758	6.79667	2.54797	1.65277	2.80617	1.19938	0.0611913	1	+	+	+	-	-	-	Promoter (<=1kb)	7132403	7146040	13638	2	409470	#NAME?	889	GO:0004252::serine-type endopeptidase activity;GO:0005886::plasma membrane;GO:0008270::zinc ion binding;GO:0008948::oxaloacetate decarboxylase activity;GO:0015081::sodium ion transmembrane transporter activity;GO:0016020::membrane;GO:0035556::intracellular signal transduction;GO:0046872::metal ion binding;GO:0071436::sodium ion export
NC_037647.1	5801320	5801622	5801467;5801478;5801443	447	479	500	227	146	192	5.6672	6.2208	7.10919	3.17148	1.99185	3.34469	4.21301	4.62456	5.28499	2.35769	1.48075	2.48645	1.15889	0.00425737	1	+	+	+	-	-	-	Promoter (<=1kb)	5790920	5800464	9545	2	409472	#NAME?	-856	GO:0003723::RNA binding;GO:0005515::protein binding;GO:0005634::nucleus;GO:0006355::regulation of transcription, DNA-templated;GO:0008168::methyltransferase activity
NC_037647.1	5783717	5784131	5783919;5783942;5783948	294	357	366	167	164	171	3.73175	4.63968	5.20773	2.33688	2.23575	2.98076	2.02549	2.51829	2.82662	1.2684	1.21351	1.61788	0.846198	0.0247727	1	+	+	+	-	-	-	3' UTR	5790920	5800464	9545	2	409472	#NAME?	16333	GO:0003723::RNA binding;GO:0005515::protein binding;GO:0005634::nucleus;GO:0006355::regulation of transcription, DNA-templated;GO:0008168::methyltransferase activity
NC_037638.1	2098274	2098521	2098401;2098402;2098399	258	208	194	114	132	132	3.27635	2.70864	2.76705	1.59965	1.80215	2.30489	2.97581	2.46018	2.51323	1.45291	1.63684	2.09346	0.616965	0.02221	1	+	+	+	-	-	-	Promoter (<=1kb)	2098371	2100044	1674	1	409479	#NAME?	0	GO:0003735::structural constituent of ribosome;GO:0005622::intracellular;GO:0005840::ribosome;GO:0006412::translation
NC_037647.1	12055623	12055986	12055770;12055769;12055782	246	394	396	125	114	131	3.12455	5.1192	5.63343	1.75266	1.55825	2.28756	1.93354	3.16787	3.48609	1.08458	0.964278	1.41559	1.30961	0.0595621	1	+	+	+	-	-	-	Promoter (<=1kb)	12049151	12056511	7361	2	409486	#NAME?	525	GO:0003676::nucleic acid binding;GO:0003723::RNA binding;GO:0004535::poly(A)-specific ribonuclease activity;GO:0005634::nucleus;GO:0005737::cytoplasm;GO:0006402::mRNA catabolic process;GO:0046872::metal ion binding
NC_037647.1	12055066	12055449	12055274;12055270;12055270	308	448	516	110	122	104	3.90885	5.81904	7.33623	1.54401	1.66665	1.81965	2.2929	3.4134	4.30337	0.905702	0.977642	1.06739	1.76225	0.0551558	1	+	+	+	-	-	-	Promoter (1-2kb)	12049151	12056511	7361	2	409486	#NAME?	1062	GO:0003676::nucleic acid binding;GO:0003723::RNA binding;GO:0004535::poly(A)-specific ribonuclease activity;GO:0005634::nucleus;GO:0005737::cytoplasm;GO:0006402::mRNA catabolic process;GO:0046872::metal ion binding
NC_037647.1	12051123	12051457	12051278;12051291;12051307	418	320	252	149	120	65	5.30035	4.16016	3.59007	2.0865	1.63955	1.14378	3.56391	2.79725	2.41393	1.40294	1.10242	0.769067	1.42217	0.0164894	1	+	+	+	-	-	-	Intron (XM_026443165.1/409486, intron 7 of 7)	12049151	12056511	7361	2	409486	#NAME?	5054	GO:0003676::nucleic acid binding;GO:0003723::RNA binding;GO:0004535::poly(A)-specific ribonuclease activity;GO:0005634::nucleus;GO:0005737::cytoplasm;GO:0006402::mRNA catabolic process;GO:0046872::metal ion binding
NC_037639.1	1913141	1913466	1913274;1913285;1913317	228	312	336	95	80	91	2.89685	4.05648	4.78203	1.33536	1.09755	1.59436	2.00159	2.80284	3.30416	0.922672	0.758356	1.10163	1.54299	0.0356506	1	+	+	+	-	-	-	Promoter (<=1kb)	1912294	1913551	1258	1	409489	#NAME?	847	GO:0016787::hydrolase activity
NC_037645.1	1753210	1753584	1753437;1753461;1753351	251	302	309	158	173	96	3.1878	3.92688	4.3989	2.21169	2.3577	1.68101	1.91481	2.35876	2.64228	1.32849	1.4162	1.00973	0.881316	0.0200269	1	+	+	+	-	-	-	Promoter (1-2kb)	1747805	1751237	3433	2	409493	#NAME?	-1973	GO:0046872::metal ion binding
NC_037647.1	6001657	6002015	6001811;6001826;6001797	276	452	530	132	123	106	3.50405	5.87088	7.53489	1.85003	1.6802	1.85431	2.19858	3.68362	4.72769	1.16078	1.05422	1.16347	1.65097	0.0811494	1	+	+	+	-	-	-	Exon (XM_393004.7/409497, exon 6 of 7)	5998451	6002758	4308	1	409497	#NAME?	3206	GO:0046872::metal ion binding
NC_037647.1	5999843	6000149	5999994;5999969;6000001	238	256	320	95	83	119	3.02335	3.33072	4.55499	1.33536	1.1382	2.0796	2.21828	2.4438	3.34207	0.979775	0.835116	1.52584	1.26059	0.0256304	1	+	+	+	-	-	-	Promoter (1-2kb)	5998451	6002758	4308	1	409497	#NAME?	1392	GO:0046872::metal ion binding
NC_037652.1	2696056	2696404	2696210;2696180;2696240	220	224	292	157	117	136	2.79565	2.916	4.15767	2.19778	1.5989	2.37421	1.80436	1.88204	2.68344	1.41849	1.03196	1.53236	0.677472	0.0862965	1	+	+	+	-	-	-	Promoter (2-3kb)	2693728	2698457	4730	1	409513	#NAME?	2328	GO:0016021::integral component of membrane
NC_037638.1	6543122	6543469	6543274;6543276;6543252	200	302	314	124	76	114	2.54265	3.92688	4.46985	1.73875	1.04335	1.99295	1.64579	2.54176	2.89321	1.12545	0.675332	1.28998	1.19594	0.0507492	1	+	+	+	-	-	-	Promoter (<=1kb)	6541341	6544039	2699	2	409520	#NAME?	570	GO:0005975::carbohydrate metabolic process
NC_037645.1	12001031	12001446	12001301;12001282;12001277	432	502	405	303	248	261	5.47745	6.51888	5.76114	4.22864	3.37395	4.54046	2.96587	3.52977	3.11948	2.28968	1.82689	2.45852	0.548295	0.0164615	1	+	+	+	-	-	-	Promoter (1-2kb)	11997541	12002750	5210	2	409533	#NAME?	1304	GO:0005509::calcium ion binding;GO:0005544::calcium-dependent phospholipid binding
NC_037645.1	6455718	6455945	6455827;6455826;6455823	212	244	229	161	128	117	2.69445	3.1752	3.2637	2.25342	1.74795	2.04494	2.66196	3.13691	3.22435	2.22625	1.72687	2.02028	0.595089	0.0118773	1	+	+	+	-	-	-	Promoter (<=1kb)	6455767	6460992	5226	1	409538	#NAME?	0	GO:0016021::integral component of membrane
NC_037649.1	1447757	1448080	1447923;1447936;1447955	309	240	214	166	101	132	3.9215	3.12336	3.05085	2.32297	1.3821	2.30489	2.7263	2.17142	2.12101	1.61497	0.960862	1.6024	0.748315	0.0315419	1	+	+	+	-	-	-	Intron (XM_026444504.1/409539, intron 1 of 8)	1389921	1460235	70315	2	409539	#NAME?	12155	GO:0015631::tubulin binding
NC_037649.1	1416035	1416317	1416145;1416180;1416160	284	247	206	110	152	132	3.60525	3.21408	2.93733	1.54401	2.07315	2.30489	2.86956	2.55821	2.33794	1.22894	1.6501	1.83455	0.720291	0.0132326	1	+	+	+	-	-	-	Intron (XM_026444504.1/409539, intron 1 of 8)	1396400	1412748	16349	2	409539	#NAME?	-3287	GO:0015631::tubulin binding
NC_037640.1	640916	641239	641049;641060;641090	231	252	294	112	102	154	2.9348	3.27888	4.18605	1.57183	1.39565	2.68615	2.04033	2.27954	2.91022	1.09277	0.970282	1.86746	0.879297	0.0455141	1	+	+	+	-	-	-	Promoter (<=1kb)	634323	639979	5657	2	409556	#NAME?	-937	GO:0005515::protein binding;GO:0016021::integral component of membrane
NC_037641.1	12155773	12156107	12155949;12155957;12155956	264	372	328	187	150	156	3.35225	4.83408	4.66851	2.61508	2.04605	2.72081	2.25402	3.25039	3.13906	1.75836	1.37574	1.82945	0.80024	0.0432021	1	+	+	+	-	-	-	Promoter (<=1kb)	12153533	12156619	3087	2	409559	#NAME?	512	GO:0005515::protein binding;GO:0008270::zinc ion binding
NC_037651.1	5095060	5095397	5095265;5095271;5095272	286	240	261	84	67	74	3.63055	3.12336	3.71778	1.18235	0.9214	1.29975	2.41948	2.08148	2.47761	0.787945	0.614042	0.866183	1.6214	0.00108936	1	+	+	+	-	-	-	Promoter (<=1kb)	5091611	5096053	4443	2	409563	#NAME?	656	GO:0016021::integral component of membrane
NC_037651.1	5094307	5094680	5094489;5094489;5094485	347	462	532	158	96	108	4.4022	6.00048	7.56327	2.21169	1.31435	1.88897	2.65134	3.61394	4.55517	1.33205	0.7916	1.13768	1.73023	0.036012	1	+	+	+	-	-	-	Promoter (1-2kb)	5091611	5096053	4443	2	409563	#NAME?	1373	GO:0016021::integral component of membrane
NC_037648.1	15487982	15488281	15488104;15488135;15488141	215	291	304	148	89	93	2.7324	3.78432	4.32795	2.07259	1.2195	1.62902	2.05159	2.8414	3.24958	1.55618	0.915645	1.22313	1.13993	0.0330132	1	+	+	+	-	-	-	Promoter (1-2kb)	15484317	15490225	5909	2	409574	#NAME?	1944	GO:0003824::catalytic activity;GO:0003873::6-phosphofructo-2-kinase activity;GO:0005524::ATP binding;GO:0006000::fructose metabolic process;GO:0006725::cellular aromatic compound metabolic process;GO:0055114::oxidation-reduction process
NC_037644.1	1327524	1327858	1327693;1327710;1327714	544	432	334	258	197	201	6.89425	5.61168	4.75365	3.60269	2.6829	3.50066	4.63563	3.77324	3.19631	2.42242	1.80396	2.35381	0.818569	0.0395348	1	+	+	+	-	-	-	Promoter (<=1kb)	1324939	1326845	1907	2	409590	#NAME?	-679	GO:0004672::protein kinase activity;GO:0005524::ATP binding;GO:0006468::protein phosphorylation;GO:0016020::membrane;GO:0016773::phosphotransferase activity, alcohol group as acceptor
NC_037638.1	9350707	9351105	9350922;9350894;9350908	522	304	249	193	192	106	6.61595	3.9528	3.5475	2.69854	2.61515	1.85431	3.73496	2.23151	2.0027	1.52343	1.47635	1.04683	0.977714	0.129246	1	+	+	+	-	-	-	Distal Intergenic	9358233	9637091	278859	1	409608	#NAME?	-7128	GO:0005515::protein binding
NC_037638.1	9359565	9360392	9359766;9359777;9360125;9359799;9360233	447	568	603	333	314	222	5.6672	7.37424	8.57076	4.64594	4.26825	3.86459	1.54172	2.0061	2.33161	1.26389	1.16114	1.05133	0.758096	0.0643891	1	+	+	+	-	-	-	Promoter (<=1kb)	9359804	9637091	277288	1	409608	#NAME?	0	GO:0005515::protein binding
NC_037652.1	7880267	7880898	7880390;7880755;7880403;7880738;7880754	426	522	531	227	133	150	5.40155	6.77808	7.54908	3.17148	1.8157	2.61683	1.92516	2.41577	2.69056	1.13035	0.647133	0.932663	1.37546	0.00895786	1	+	+	+	-	-	-	Promoter (<=1kb)	7881475	7883747	2273	1	409610	#NAME?	-577	GO:0007165::signal transduction
NC_037652.1	8028318	8028722	8028516;8028512;8028530	879	927	711	284	270	157	11.132	12.0269	10.1033	3.96435	3.67205	2.73814	6.19134	6.68906	5.6192	2.20487	2.0423	1.52289	1.68084	0.000698433	1	+	+	+	-	-	-	Intron (XM_006563614.3/409611, intron 1 of 14)	7909918	8044316	134399	2	409611	#NAME?	15594	GO:0004222::metalloendopeptidase activity;GO:0005215::transporter activity;GO:0006508::proteolysis;GO:0008270::zinc ion binding
NC_037645.1	2566002	2566303	2566098;2566117;2566205	258	211	200	202	191	112	3.27635	2.74752	2.85219	2.82373	2.6016	1.95829	2.44371	2.04928	2.12735	2.10612	1.94044	1.46062	0.265591	0.192672	1	+	+	+	-	-	-	Intron (XM_026442548.1/409616, intron 1 of 13)	2525106	2571437	46332	2	409616	#NAME?	5134	GO:0003735::structural constituent of ribosome;GO:0005057::receptor signaling protein activity;GO:0005840::ribosome;GO:0006412::translation;GO:0007165::signal transduction;GO:0016491::oxidoreductase activity;GO:0045454::cell redox homeostasis;GO:0055114::oxidation-reduction process
NC_037645.1	2580723	2580975	2580844;2580852;2580846	203	233	214	133	156	157	2.5806	3.03264	3.05085	1.86394	2.12735	2.73814	2.29756	2.70002	2.71623	1.6595	1.89402	2.43782	0.364564	0.114597	1	+	+	+	-	-	-	Promoter (<=1kb)	2525106	2581637	56532	2	409616	#NAME?	662	GO:0003735::structural constituent of ribosome;GO:0005057::receptor signaling protein activity;GO:0005840::ribosome;GO:0006412::translation;GO:0007165::signal transduction;GO:0016491::oxidoreductase activity;GO:0045454::cell redox homeostasis;GO:0055114::oxidation-reduction process
NC_037645.1	2568704	2568977	2568846;2568829;2568858	272	210	239	123	99	80	3.45345	2.73456	3.4056	1.72484	1.355	1.40373	2.83902	2.24804	2.79969	1.41796	1.11392	1.15398	1.09743	0.00764111	1	+	+	+	-	-	-	Promoter (2-3kb)	2525106	2571437	46332	2	409616	#NAME?	2460	GO:0003735::structural constituent of ribosome;GO:0005057::receptor signaling protein activity;GO:0005840::ribosome;GO:0006412::translation;GO:0007165::signal transduction;GO:0016491::oxidoreductase activity;GO:0045454::cell redox homeostasis;GO:0055114::oxidation-reduction process
NC_037645.1	2562114	2562365	2562240;2562233;2562242	234	243	211	119	141	122	2.97275	3.16224	3.00828	1.6692	1.9241	2.13159	2.6572	2.82658	2.68896	1.49202	1.71986	1.90533	0.675462	0.00605187	1	+	+	+	-	-	-	Intron (XM_026442548.1/409616, intron 1 of 13)	2525106	2571437	46332	2	409616	#NAME?	9072	GO:0003735::structural constituent of ribosome;GO:0005057::receptor signaling protein activity;GO:0005840::ribosome;GO:0006412::translation;GO:0007165::signal transduction;GO:0016491::oxidoreductase activity;GO:0045454::cell redox homeostasis;GO:0055114::oxidation-reduction process
NC_037644.1	10750570	10750897	10750726;10750751;10750734	320	394	396	160	279	231	4.06065	5.1192	5.63343	2.23951	3.794	4.02056	2.78861	3.51556	3.8687	1.53796	2.60549	2.76108	0.559111	0.0967324	1	+	+	+	-	-	-	Promoter (<=1kb)	10732918	10751840	18923	2	409619	#NAME?	943	GO:0008152::metabolic process;GO:0008168::methyltransferase activity;GO:0008237::metallopeptidase activity;GO:0008270::zinc ion binding
NC_037645.1	4157250	4157787	4157444;4157647;4157642;4157401;4157652	357	527	457	336	209	192	4.5287	6.84288	6.49902	4.68767	2.8455	3.34469	1.89608	2.86499	2.72102	1.96264	1.19136	1.40036	0.716193	0.0661985	1	+	+	+	-	-	-	Exon (XM_006562612.3/409631, exon 13 of 18)	4152708	4161254	8547	1	409631	#NAME?	4542	GO:0005216::ion channel activity;GO:0005515::protein binding;GO:0006811::ion transport;GO:0016020::membrane;GO:0055085::transmembrane transport
NC_037645.1	11825625	11826138	11825790;11825808;11825851	268	394	492	184	133	150	3.40285	5.1192	6.99567	2.57335	1.8157	2.61683	1.49124	2.24339	3.06572	1.12772	0.795697	1.14678	1.14728	0.103999	1	+	+	+	-	-	-	Promoter (2-3kb)	11823155	11824853	1699	1	409637	#NAME?	2470	GO:0001104::RNA polymerase II transcription cofactor activity;GO:0003735::structural constituent of ribosome;GO:0005840::ribosome;GO:0006357::regulation of transcription from RNA polymerase II promoter;GO:0006412::translation;GO:0016592::mediator complex
NC_037653.1	2652645	2652915	2652768;2652756;2652782	448	390	306	123	136	117	5.67985	5.06736	4.35633	1.72484	1.85635	2.04494	4.721	4.21191	3.62091	1.43366	1.54297	1.69972	1.42467	0.0108614	1	+	+	+	-	-	-	Promoter (2-3kb)	2649955	2691003	41049	1	409638	#NAME?	2690	GO:0016021::integral component of membrane
NC_037647.1	10897194	10897513	10897327;10897369;10897339	364	332	326	175	143	121	4.61725	4.31568	4.64013	2.44816	1.9512	2.11426	3.25012	3.03785	3.26623	1.72328	1.37347	1.48825	1.05921	0.000352403	1	+	+	+	-	-	-	Promoter (<=1kb)	10889541	10896973	7433	2	409650	#NAME?	-221	GO:0005215::transporter activity;GO:0005515::protein binding;GO:0006810::transport;GO:0016020::membrane;GO:0016021::integral component of membrane;GO:0055085::transmembrane transport
NC_037653.1	5063980	5064449	5064107;5064142;5064416;5064153	827	551	521	668	639	408	10.4742	7.15392	7.40718	9.30579	8.672	7.08797	5.01984	3.42857	3.54994	4.45987	4.15612	3.39696	-0.00175423	0.994002	1	+	+	+	-	-	-	Intron (XM_026445801.1/409655, intron 23 of 29)	5068823	5077526	8704	1	409655	#NAME?	-4374	GO:0003723::RNA binding;GO:0005515::protein binding
NC_037653.1	5073317	5073558	5073425;5073437;5073447	398	347	426	327	288	238	5.04735	4.51008	6.05913	4.56248	3.91595	4.14187	4.69802	4.19793	5.63977	4.24671	3.64492	3.85521	0.30733	0.146356	1	+	+	+	-	-	-	Promoter (1-2kb)	5071366	5077526	6161	1	409655	#NAME?	1951	GO:0003723::RNA binding;GO:0005515::protein binding
NC_037641.1	12500788	12501416	12501049;12500940;12501029	1626	1646	1750	890	533	545	20.5816	21.3451	24.8467	12.3938	7.2357	9.46218	7.37047	7.64388	8.89784	4.43834	2.59117	3.3885	1.19867	0.0033955	1	+	+	+	-	-	-	Promoter (1-2kb)	12498997	12551707	52711	1	409658	#NAME?	1791	GO:0004252::serine-type endopeptidase activity;GO:0005886::plasma membrane
NC_037652.1	5986181	5987357	5986477;5986522;5986686;5987127;5986701;5987111	3175	3385	3311	2634	1781	1359	40.1764	43.8826	46.9973	36.6529	24.1461	23.5688	7.68884	8.39813	8.99421	7.01453	4.62101	4.51053	0.635422	0.0497589	1	+	+	+	-	-	-	Promoter (1-2kb)	5988608	5993569	4962	1	409664	#NAME?	-1251	GO:0005515::protein binding;GO:0005737::cytoplasm;GO:0017089::glycolipid transporter activity;GO:0046836::glycolipid transport;GO:0051861::glycolipid binding
NC_037652.1	5976218	5976588	5976369;5976357;5976388	543	416	403	400	363	254	6.8816	5.40432	5.73276	5.57791	4.9322	4.41915	4.17813	3.28121	3.48062	3.3866	2.99456	2.68307	0.271351	0.145117	1	+	+	+	-	-	-	Intron (XM_026445594.1/409665, intron 1 of 21)	5917080	5982843	65764	2	409665	#NAME?	6255	GO:0005634::nucleus;GO:0006355::regulation of transcription, DNA-templated;GO:0008270::zinc ion binding
NC_037652.1	5955028	5955526	5955108;5955401;5955194;5955410;5955199;5955431	442	531	440	462	334	251	5.60395	6.89472	6.25779	6.44033	4.53925	4.36716	2.52965	3.11231	2.8248	2.90719	2.04904	1.97136	0.289455	0.228354	1	+	+	+	-	-	-	Intron (XM_026445594.1/409665, intron 1 of 21)	5917080	5951087	34008	2	409665	#NAME?	-3941	GO:0005634::nucleus;GO:0006355::regulation of transcription, DNA-templated;GO:0008270::zinc ion binding
NC_037652.1	5963057	5963332	5963167;5963180;5963196	283	198	247	250	229	115	3.5926	2.57904	3.51912	3.49141	3.1165	2.01028	2.93202	2.10482	2.87205	2.84943	2.54346	1.64064	0.169225	0.55511	1	+	+	+	-	-	-	Intron (XM_026445594.1/409665, intron 1 of 21)	5917080	5951087	34008	2	409665	#NAME?	-11970	GO:0005634::nucleus;GO:0006355::regulation of transcription, DNA-templated;GO:0008270::zinc ion binding
NC_037647.1	4343206	4343435	4343321;4343324;4343322	221	252	254	153	154	149	2.8083	3.27888	3.61845	2.14214	2.10025	2.5995	2.75031	3.21118	3.54374	2.09791	2.05688	2.54582	0.504427	0.034317	1	+	+	+	-	-	-	Intron (XM_016914308.2/409670, intron 12 of 13)	4309081	4333359	24279	2	409670	#NAME?	-9847	GO:0005215::transporter activity;GO:0005515::protein binding;GO:0006810::transport;GO:0016020::membrane;GO:0016021::integral component of membrane;GO:0055085::transmembrane transport
NC_037647.1	4310491	4310814	4310669;4310672;4310708	223	243	193	175	154	129	2.8336	3.16224	2.75286	2.44816	2.10025	2.2529	1.96997	2.19845	1.91384	1.70201	1.46013	1.56626	0.363256	0.0170576	1	+	+	+	-	-	-	3' UTR	4309081	4314261	5181	2	409670	#NAME?	3447	GO:0005215::transporter activity;GO:0005515::protein binding;GO:0006810::transport;GO:0016020::membrane;GO:0016021::integral component of membrane;GO:0055085::transmembrane transport
NC_037647.1	4405249	4405493	4405372;4405367;4405383	233	224	210	276	175	131	2.9601	2.916	2.99409	3.85307	2.3848	2.28756	2.72149	2.68095	2.75274	3.54248	2.19256	2.10316	0.0571924	0.841642	1	+	+	+	-	-	-	Intron (XM_026443349.1/100577188, intron 1 of 5)	4313623	4384999	71377	2	409670	#NAME?	-20250	GO:0005215::transporter activity;GO:0005515::protein binding;GO:0006810::transport;GO:0016020::membrane;GO:0016021::integral component of membrane;GO:0055085::transmembrane transport
NC_037647.1	8344065	8344647	8344221;8344474;8344234;8344484;8344210;8344498	651	792	970	419	477	404	8.2478	10.2773	13.7785	5.8422	6.4769	7.01865	3.18666	3.97079	5.32353	2.25722	2.50245	2.71176	0.740275	0.110193	1	+	+	+	-	-	-	3' UTR	8336235	8339125	2891	1	409672	#NAME?	7830	GO:0003968::RNA-directed RNA polymerase activity;GO:0004482::mRNA (guanine-N7-)-methyltransferase activity;GO:0005319::lipid transporter activity;GO:0005524::ATP binding;GO:0006370::7-methylguanosine mRNA capping;GO:0006869::lipid transport;GO:0019012::virion
NC_037642.1	2952708	2953034	2952871;2952846;2952877	264	324	322	141	140	116	3.35225	4.212	4.58337	1.97522	1.91055	2.02761	2.30917	2.9014	3.15721	1.36061	1.31606	1.3967	1.03862	0.0285424	1	+	+	+	-	-	-	Exon (XM_016912457.2/409678, exon 3 of 15)	2948082	2962408	14327	1	409678	#NAME?	4626	GO:0005515::protein binding;GO:0006355::regulation of transcription, DNA-templated;GO:0019953::sexual reproduction;GO:0050524::coenzyme-B sulfoethylthiotransferase activity
NC_037652.1	8345206	8345646	8345443;8345440;8345517	315	388	446	226	207	135	3.9974	5.04144	6.34293	3.15757	2.8184	2.35688	2.04176	2.57503	3.2398	1.6128	1.43956	1.20383	0.88434	0.0616194	1	+	+	+	-	-	-	Promoter (2-3kb)	8306616	8347879	41264	2	409680	#NAME?	2233	GO:0019031::viral envelope;GO:0035556::intracellular signal transduction
NC_037638.1	15870884	15871177	15871026;15871032;15871045	271	309	306	178	151	115	3.4408	4.0176	4.35633	2.48989	2.0596	2.01028	2.6362	3.07812	3.33764	1.90765	1.57798	1.5402	0.84887	0.00918663	1	+	+	+	-	-	-	Exon (XM_026446211.1/412948, exon 5 of 6)	15872179	15875269	3091	2	409689	#NAME?	4092	GO:0000228::nuclear chromosome;GO:0003676::nucleic acid binding;GO:0003677::DNA binding;GO:0005515::protein binding;GO:0005622::intracellular;GO:0006355::regulation of transcription, DNA-templated;GO:0006952::defense response;GO:0035092::sperm chromatin condensation
NC_037638.1	15740742	15741372	15741039;15741319;15741039;15741087	456	606	646	324	270	235	5.78105	7.86672	9.18093	4.52075	3.67205	4.08988	2.06369	2.80822	3.27736	1.61379	1.31083	1.45998	0.894223	0.0634204	1	+	+	+	-	-	-	Exon (XM_006570831.3/409690, exon 6 of 7)	15737204	15743305	6102	1	409690	#NAME?	3538	GO:0005515::protein binding;GO:0005634::nucleus;GO:0006355::regulation of transcription, DNA-templated
NC_037648.1	8804527	8804943	8804707;8804757;8804726	485	434	377	107	87	144	6.1479	5.6376	5.36382	1.50228	1.1924	2.51285	3.32091	3.04526	2.89737	0.811487	0.644099	1.35737	1.71948	0.00253478	1	+	+	+	-	-	-	Intron (XM_001120157.5/724336, intron 5 of 8)	8782411	8798001	15591	1	409695	#NAME?	22116	.
NC_037648.1	8808445	8808788	8808599;8808611;8808634	326	354	320	154	172	122	4.13655	4.6008	4.55499	2.15605	2.34415	2.13159	2.70861	3.0126	2.9826	1.41178	1.53495	1.39576	1.00312	0.00121161	1	+	+	+	-	-	-	Intron (XM_001120157.5/724336, intron 5 of 8)	8782411	8798001	15591	1	409695	#NAME?	26034	.
NC_037648.1	8814073	8814347	8814208;8814199;8814216	243	199	253	141	121	159	3.0866	2.592	3.60426	1.97522	1.6531	2.7728	2.52822	2.12309	2.95223	1.61789	1.35404	2.27118	0.536245	0.0970759	1	+	+	+	-	-	-	Intron (XM_001120157.5/724336, intron 5 of 8)	8782411	8798001	15591	1	409695	#NAME?	31662	.
NC_037641.1	10445656	10446079	10445861;10445799;10445812	239	362	341	150	162	110	3.036	4.70448	4.85298	2.10041	2.20865	1.92363	1.61288	2.49926	2.57816	1.11585	1.17335	1.02193	1.01475	0.0651291	1	+	+	+	-	-	-	Intron (XM_006567281.3/725092, intron 4 of 8)	10465441	10475107	9667	2	409697	#NAME?	29028	GO:0005515::protein binding
NC_037641.1	10428940	10429289	10429147;10429157;10429200	225	322	281	147	179	106	2.8589	4.18608	4.00158	2.05868	2.439	1.85431	1.83991	2.69405	2.57531	1.32491	1.56968	1.19339	0.798317	0.0480198	1	+	+	+	-	-	-	Intron (XM_006567281.3/725092, intron 4 of 8)	10465441	10475107	9667	2	409697	#NAME?	45818	GO:0005515::protein binding
NC_037641.1	10489111	10489854	10489224;10489350;10489704;10489366;10489643;10489400;10489631	529	827	841	579	379	292	6.7045	10.7309	11.948	8.0678	5.149	5.07769	2.02983	3.24885	3.61734	2.44258	1.55889	1.5373	0.683592	0.132373	1	+	+	+	-	-	-	Exon (NM_001242387.1/409697, exon 6 of 21)	10465441	10482249	16809	2	409697	#NAME?	-6862	GO:0005515::protein binding
NC_037647.1	5318961	5319569	5319301;5319371;5319375	387	542	658	225	229	236	4.9082	7.03728	9.35121	3.14366	3.1165	4.10721	1.8154	2.60288	3.45873	1.16275	1.1527	1.51913	1.03858	0.096883	1	+	+	+	-	-	-	Exon (NM_001204249.1/552518, exon 6 of 6)	5337866	5342906	5041	1	409699	NM_001242465.1	-18297	GO:0005219::ryanodine-sensitive calcium-release channel activity;GO:0006874::cellular calcium ion homeostasis;GO:0016021::integral component of membrane
NC_037647.1	5337825	5338219	5338061;5338012;5337923	230	325	327	190	212	159	2.92215	4.22496	4.65432	2.65681	2.88615	2.7728	1.66637	2.40931	2.65415	1.51506	1.64584	1.5812	0.505042	0.153359	1	+	+	+	-	-	-	Promoter (<=1kb)	5337866	5342906	5041	1	409699	NM_001242465.1	0	GO:0005219::ryanodine-sensitive calcium-release channel activity;GO:0006874::cellular calcium ion homeostasis;GO:0016021::integral component of membrane
NC_037647.1	5320134	5320726	5320391;5320387;5320534	295	460	588	175	277	179	3.7444	5.97456	8.35791	2.44816	3.7669	3.1194	1.42231	2.26943	3.17475	0.929933	1.43086	1.1849	0.953506	0.152055	1	+	+	+	-	-	-	Exon (XM_026443085.1/552518, exon 6 of 7)	5337866	5342906	5041	1	409699	NM_001242465.1	-17140	GO:0005219::ryanodine-sensitive calcium-release channel activity;GO:0006874::cellular calcium ion homeostasis;GO:0016021::integral component of membrane
NC_037640.1	1883553	1884108	1883739;1883809;1883721	349	430	516	203	242	151	4.4275	5.58576	7.33623	2.83764	3.29265	2.63416	1.7937	2.26294	2.97211	1.14961	1.33394	1.06717	0.985158	0.0705608	1	+	+	+	-	-	-	Exon (XM_026439471.1/409703, exon 7 of 15)	1870814	1893196	22383	2	409703	#NAME?	9088	GO:0004616::phosphogluconate dehydrogenase (decarboxylating) activity;GO:0005089::Rho guanyl-nucleotide exchange factor activity;GO:0005515::protein binding;GO:0005524::ATP binding;GO:0006098::pentose-phosphate shunt;GO:0035023::regulation of Rho protein signal transduction;GO:0050661::NADP binding;GO:0055114::oxidation-reduction process
NC_037643.1	14889712	14890073	14889871;14889869;14889940	243	298	252	150	190	100	3.0866	3.87504	3.59007	2.10041	2.58805	1.75033	1.92061	2.4112	2.23389	1.30696	1.61039	1.08913	0.712615	0.0150087	1	+	+	+	-	-	-	Distal Intergenic	14904450	14989935	85486	1	409707	#NAME?	-14377	GO:0005515::protein binding
NC_037643.1	14893885	14894241	14894030;14894090;14894039	218	277	260	179	176	88	2.77035	3.60288	3.70359	2.5038	2.39835	1.54237	1.74797	2.27325	2.3368	1.57978	1.51325	0.973166	0.644896	0.0463118	1	+	+	+	-	-	-	Distal Intergenic	14904450	14989935	85486	1	409707	#NAME?	-10209	GO:0005515::protein binding
NC_037651.1	1624321	1624677	1624561;1624514;1624561	257	285	226	150	138	69	3.2637	3.70656	3.22113	2.10041	1.88345	1.2131	2.05925	2.33867	2.03239	1.32526	1.18837	0.765411	0.971611	0.0104667	1	+	+	+	-	-	-	Intron (XM_026444916.1/409711, intron 2 of 18)	1610948	1759252	148305	1	409711	#NAME?	13373	GO:0003700::sequence-specific DNA binding transcription factor activity;GO:0005515::protein binding;GO:0006355::regulation of transcription, DNA-templated;GO:0006914::autophagy;GO:0043565::sequence-specific DNA binding
NC_037651.1	1660844	1661122	1660985;1660979;1660991	247	273	252	169	196	106	3.1372	3.55104	3.59007	2.3647	2.66935	1.85431	2.53282	2.86694	2.89845	1.90914	2.1551	1.49708	0.577371	0.0223975	1	+	+	+	-	-	-	Promoter (1-2kb)	1662533	1759252	96720	1	409711	#NAME?	-1411	GO:0003700::sequence-specific DNA binding transcription factor activity;GO:0005515::protein binding;GO:0006355::regulation of transcription, DNA-templated;GO:0006914::autophagy;GO:0043565::sequence-specific DNA binding
NC_037650.1	10794068	10794410	10794227;10794251;10794253	290	314	394	169	119	137	3.68115	4.0824	5.60505	2.3647	1.626	2.39154	2.41744	2.68095	3.68088	1.55292	1.06781	1.57054	1.06671	0.0418777	1	+	+	+	-	-	-	Exon (XM_003251121.4/409715, exon 4 of 19)	10785896	10805100	19205	2	409715	#NAME?	10690	GO:0003333::amino acid transmembrane transport;GO:0005215::transporter activity;GO:0006810::transport;GO:0006811::ion transport;GO:0015171::amino acid transmembrane transporter activity;GO:0016020::membrane;GO:0016021::integral component of membrane;GO:0055085::transmembrane transport
NC_037642.1	13748337	13748685	13748466;13748491;13748452	596	699	771	521	341	268	7.55205	9.072	10.9547	7.26102	4.6341	4.66177	4.87423	5.85523	7.07036	4.68639	2.99093	3.00879	0.736125	0.0498579	1	+	+	+	-	-	-	Promoter (<=1kb)	13747520	13752791	5272	1	409727	#NAME?	817	GO:0003677::DNA binding;GO:0003743::translation initiation factor activity;GO:0003777::microtubule motor activity;GO:0004882::androgen receptor activity;GO:0005496::steroid binding;GO:0005524::ATP binding;GO:0005634::nucleus;GO:0005672::transcription factor TFIIA complex;GO:0005886::plasma membrane;GO:0006281::DNA repair;GO:0006355::regulation of transcription, DNA-templated;GO:0006367::transcrip…
NC_037642.1	13710671	13711017	13710845;13710827;13710828	1454	1435	1429	1044	1003	1072	18.4058	18.6106	20.2917	14.5359	13.6042	18.5951	11.9479	12.0808	13.1721	9.4358	8.831	12.0708	0.294229	0.135491	1	+	+	+	-	-	-	Intron (XM_016912104.2/409729, intron 1 of 4)	13723060	13724974	1915	1	409728	#NAME?	-12043	.
NC_037638.1	11322145	11322443	11322284;11322301;11322296	298	400	350	183	203	240	3.78235	5.19696	4.98069	2.55944	2.7642	4.17653	2.84942	3.91512	3.75219	1.92815	2.0824	3.14638	0.555274	0.0928905	1	+	+	+	-	-	-	Promoter (1-2kb)	11313667	11320407	6741	2	409733	#NAME?	-1738	GO:0003676::nucleic acid binding;GO:0005524::ATP binding;GO:0005634::nucleus;GO:0006338::chromatin remodeling;GO:0015979::photosynthesis;GO:0015995::chlorophyll biosynthetic process;GO:0016491::oxidoreductase activity;GO:0016818::hydrolase activity, acting on acid anhydrides, in phosphorus-containing anhydrides;GO:0055114::oxidation-reduction process
NC_037638.1	11329951	11330218	11330081;11330106;11330131	210	242	211	168	173	145	2.66915	3.14928	3.00828	2.35079	2.3577	2.53018	2.24339	2.64693	2.52842	1.97581	1.98162	2.12659	0.286151	0.0496895	1	+	+	+	-	-	-	Intron (XM_393231.6/409733, intron 1 of 9)	11313667	11338662	24996	2	409733	#NAME?	8444	GO:0003676::nucleic acid binding;GO:0005524::ATP binding;GO:0005634::nucleus;GO:0006338::chromatin remodeling;GO:0015979::photosynthesis;GO:0015995::chlorophyll biosynthetic process;GO:0016491::oxidoreductase activity;GO:0016818::hydrolase activity, acting on acid anhydrides, in phosphorus-containing anhydrides;GO:0055114::oxidation-reduction process
NC_037638.1	11351483	11352018	11351791;11351804;11351787	460	570	592	226	190	163	5.83165	7.40016	8.41467	3.15757	2.58805	2.84212	2.45072	3.10987	3.53622	1.32695	1.08761	1.19438	1.33378	0.0241542	1	+	+	+	-	-	-	Promoter (<=1kb)	11350325	11352483	2159	2	409734	#NAME?	465	GO:0000090::mitotic anaphase;GO:0000940::condensed chromosome outer kinetochore;GO:0005102::receptor binding;GO:0005577::fibrinogen complex;GO:0005876::spindle microtubule;GO:0006891::intra-Golgi vesicle-mediated transport;GO:0006914::autophagy;GO:0007059::chromosome segregation;GO:0007067::mitotic nuclear division;GO:0007165::signal transduction;GO:0008017::microtubule binding;GO:0016829::lyase …
NC_037650.1	10959011	10959248	10959127;10959114;10959130	424	332	337	200	168	107	5.37625	4.31568	4.79622	2.79591	2.28995	1.87164	5.08826	4.0845	4.5393	2.64614	2.16728	1.77138	1.05823	0.00371876	1	+	+	+	-	-	-	Promoter (2-3kb)	10949823	10956772	6950	2	409736	#NAME?	-2239	GO:0008152::metabolic process;GO:0016491::oxidoreductase activity;GO:0055114::oxidation-reduction process
NC_037650.1	10959633	10959902	10959762;10959783;10959777	588	416	301	210	125	111	7.45085	5.40432	4.28538	2.93501	1.7073	1.94096	6.21596	4.50862	3.57513	2.44857	1.42434	1.61927	1.38054	0.047541	1	+	+	+	-	-	-	Promoter (2-3kb)	10949823	10956772	6950	2	409736	#NAME?	-2861	GO:0008152::metabolic process;GO:0016491::oxidoreductase activity;GO:0055114::oxidation-reduction process
NC_037638.1	12599878	12600133	12599999;12600011;12600004	610	469	437	430	424	475	7.72915	6.0912	6.21522	5.99521	5.75875	8.24908	6.80077	5.35956	5.46869	5.2751	5.06705	7.25825	0.00234428	0.991539	1	+	+	+	-	-	-	Promoter (<=1kb)	12599847	12602924	3078	1	409739	#NAME?	31	GO:0003700::sequence-specific DNA binding transcription factor activity;GO:0006355::regulation of transcription, DNA-templated;GO:0007155::cell adhesion;GO:0016021::integral component of membrane;GO:0042246::tissue regeneration
NC_037638.1	7107405	7107799	7107471;7107699;7107688;7107690	409	330	344	225	196	217	5.1865	4.28976	4.89555	3.14366	2.66935	3.77794	2.95763	2.44626	2.79171	1.79269	1.52221	2.15439	0.583496	0.0198767	1	+	+	+	-	-	-	Intron (XM_016916410.2/409748, intron 1 of 11)	7090810	7115169	24360	2	409748	#NAME?	7370	GO:0005515::protein binding;GO:0008092::cytoskeletal protein binding;GO:0030674::protein binding, bridging;GO:0042802::identical protein binding;GO:0043130::ubiquitin binding
NC_037651.1	6480603	6480864	6480729;6480726;6480739	212	234	210	209	145	105	2.69445	3.0456	2.99409	2.9211	1.9783	1.83698	2.31652	2.61841	2.57413	2.51138	1.70082	1.57932	0.374692	0.181462	1	+	+	+	-	-	-	Promoter (2-3kb)	6477760	6502539	24780	1	409752	#NAME?	2843	GO:0047134::protein-disulfide reductase activity;GO:0055114::oxidation-reduction process
NC_037651.1	6495762	6496042	6495865;6495885;6495891	234	246	206	166	181	156	2.97275	3.20112	2.93733	2.32297	2.4661	2.72081	2.38297	2.56603	2.35458	1.8621	1.97684	2.18101	0.278851	0.0241635	1	+	+	+	-	-	-	5' UTR	6507103	6515683	8581	1	409753	#NAME?	-11061	GO:0016020::membrane;GO:0046872::metal ion binding;GO:0048193::Golgi vesicle transport
NC_037638.1	10774458	10774875	10774665;10774655;10774632	282	496	490	164	159	140	3.57995	6.44112	6.96729	2.29515	2.168	2.44353	1.92916	3.47098	3.75452	1.23681	1.16829	1.31676	1.29848	0.0848327	1	+	+	+	-	-	-	Promoter (1-2kb)	10768895	10772534	3640	2	409756	#NAME?	-1924	GO:0003677::DNA binding;GO:0003678::DNA helicase activity;GO:0003723::RNA binding;GO:0003724::RNA helicase activity;GO:0005515::protein binding;GO:0005524::ATP binding;GO:0006281::DNA repair;GO:0006310::DNA recombination;GO:0006355::regulation of transcription, DNA-templated;GO:0008134::transcription factor binding;GO:0009378::four-way junction helicase activity;GO:0016787::hydrolase activity;GO:…
NC_037641.1	3502045	3502354	3502181;3502220;3502220	252	311	297	176	171	122	3.20045	4.04352	4.22862	2.46207	2.3306	2.13159	2.3255	2.93809	3.07258	1.78898	1.69345	1.54885	0.728459	0.0320418	1	+	+	+	-	-	-	Intron (XM_393267.7/409774, intron 7 of 9)	3494951	3497895	2945	1	409773	#NAME?	7094	GO:0051287::NAD binding;GO:0055114::oxidation-reduction process
NC_037641.1	3657409	3657854	3657720;3657719;3657737	363	341	278	256	237	134	4.6046	4.43232	3.95901	3.57487	3.2249	2.33955	2.32554	2.23853	1.99949	1.80548	1.62873	1.18158	0.507901	0.0528689	1	+	+	+	-	-	-	Intron (XM_393267.7/409774, intron 1 of 9)	3498711	3667571	168861	2	409774	#NAME?	9717	GO:0004252::serine-type endopeptidase activity;GO:0005509::calcium ion binding;GO:0005515::protein binding;GO:0005578::proteinaceous extracellular matrix;GO:0005634::nucleus;GO:0005886::plasma membrane;GO:0007165::signal transduction
NC_037649.1	5004052	5004499	5004250;5004270;5004260	574	417	352	216	202	169	7.27375	5.41728	5.00907	3.01847	2.75065	2.9461	3.65718	2.72377	2.51852	1.51766	1.38301	1.48128	1.02215	0.0484378	1	+	+	+	-	-	-	Distal Intergenic	5021060	5133730	112671	1	409778	#NAME?	-16561	.
NC_037649.1	5010020	5010268	5010140;5010128;5010133	245	209	178	141	124	74	3.1119	2.7216	2.54001	1.97522	1.69375	1.29975	2.81509	2.46202	2.29775	1.78683	1.5322	1.17578	0.752958	0.012367	1	+	+	+	-	-	-	Distal Intergenic	5021060	5133730	112671	1	409778	#NAME?	-10792	.
NC_037649.1	5011363	5011849	5011669;5011690;5011545;5011709	290	406	414	188	208	116	3.68115	5.27472	5.88885	2.62899	2.83195	2.02761	1.70263	2.4397	2.72375	1.21598	1.30985	0.937825	0.987192	0.0514581	1	+	+	+	-	-	-	Distal Intergenic	5021060	5133730	112671	1	409778	#NAME?	-9211	.
NC_037649.1	4978472	4978738	4978577;4978609;4978609	230	260	205	147	199	83	2.92215	3.38256	2.92314	2.05868	2.71	1.45572	2.46523	2.85365	2.46607	1.73678	2.28625	1.2281	0.56806	0.0937324	1	+	+	+	-	-	-	Distal Intergenic	5021060	5133730	112671	1	409778	#NAME?	-42322	.
NC_037649.1	5051810	5052110	5051953;5051952;5051945	261	298	297	186	187	119	3.3143	3.87504	4.22862	2.60117	2.5474	2.0796	2.48023	2.89985	3.16445	1.94656	1.90633	1.55625	0.659603	0.016659	1	+	+	+	-	-	-	Intron (XM_006562213.3/409778, intron 1 of 7)	5079620	5135047	55428	1	409778	#NAME?	-27510	.
NC_037638.1	3522904	3523303	3523061;3523030;3523080	329	394	398	130	213	154	4.1745	5.1192	5.66181	1.82221	2.8997	2.68615	2.35077	2.88276	3.18832	1.02614	1.6329	1.51264	1.01351	0.0117173	1	+	+	+	-	-	-	Intron (XM_026439190.1/409780, intron 1 of 14)	3291485	3552036	260552	2	409780	#NAME?	28733	GO:0003676::nucleic acid binding;GO:0003723::RNA binding;GO:0004535::poly(A)-specific ribonuclease activity;GO:0005634::nucleus;GO:0005737::cytoplasm;GO:0006402::mRNA catabolic process;GO:0016021::integral component of membrane;GO:0046872::metal ion binding
NC_037638.1	3493780	3494119	3493921;3493993;3493879	233	255	273	103	96	81	2.9601	3.31776	3.88806	1.44664	1.31435	1.42106	1.96107	2.19802	2.57585	0.958403	0.87076	0.941456	1.28146	0.0161663	1	+	+	+	-	-	-	Intron (XM_026439190.1/409780, intron 1 of 14)	3291485	3552036	260552	2	409780	#NAME?	57917	GO:0003676::nucleic acid binding;GO:0003723::RNA binding;GO:0004535::poly(A)-specific ribonuclease activity;GO:0005634::nucleus;GO:0005737::cytoplasm;GO:0006402::mRNA catabolic process;GO:0016021::integral component of membrane;GO:0046872::metal ion binding
NC_037638.1	3617137	3617560	3617295;3617311;3617311	366	360	395	130	135	168	4.64255	4.67856	5.61924	1.82221	1.8428	2.92877	2.46636	2.48549	2.98523	0.968053	0.978991	1.55592	1.18004	0.00484578	1	+	+	+	-	-	-	Intron (XM_026439141.1/409780, intron 3 of 16)	3291485	3679215	387731	2	409780	#NAME?	61655	GO:0003676::nucleic acid binding;GO:0003723::RNA binding;GO:0004535::poly(A)-specific ribonuclease activity;GO:0005634::nucleus;GO:0005737::cytoplasm;GO:0006402::mRNA catabolic process;GO:0016021::integral component of membrane;GO:0046872::metal ion binding
NC_037638.1	3719725	3720039	3719876;3719860;3719902	221	256	304	77	133	101	2.8083	3.33072	4.32795	1.08498	1.8157	1.76766	2.00817	2.38174	3.09484	0.77585	1.29837	1.26402	1.16486	0.0306005	1	+	+	+	-	-	-	Intron (XM_026439162.1/409780, intron 1 of 13)	3291485	3746688	455204	2	409780	#NAME?	26649	GO:0003676::nucleic acid binding;GO:0003723::RNA binding;GO:0004535::poly(A)-specific ribonuclease activity;GO:0005634::nucleus;GO:0005737::cytoplasm;GO:0006402::mRNA catabolic process;GO:0016021::integral component of membrane;GO:0046872::metal ion binding
NC_037638.1	3645696	3645987	3645840;3645826;3645833	236	248	254	125	110	68	2.99805	3.22704	3.61845	1.75266	1.50405	1.19577	2.31272	2.48936	2.7913	1.35201	1.16023	0.922426	1.14457	0.00186247	1	+	+	+	-	-	-	Intron (XM_026439141.1/409780, intron 3 of 16)	3291485	3679215	387731	2	409780	#NAME?	33228	GO:0003676::nucleic acid binding;GO:0003723::RNA binding;GO:0004535::poly(A)-specific ribonuclease activity;GO:0005634::nucleus;GO:0005737::cytoplasm;GO:0006402::mRNA catabolic process;GO:0016021::integral component of membrane;GO:0046872::metal ion binding
NC_037638.1	3449935	3450421	3450216;3450243;3450245	295	319	379	175	177	91	3.7444	4.1472	5.3922	2.44816	2.4119	1.59436	1.73189	1.91819	2.49404	1.13234	1.11557	0.737435	1.04131	0.025558	1	+	+	+	-	-	-	Intron (XM_026439190.1/409780, intron 2 of 14)	3291485	3552036	260552	2	409780	#NAME?	101615	GO:0003676::nucleic acid binding;GO:0003723::RNA binding;GO:0004535::poly(A)-specific ribonuclease activity;GO:0005634::nucleus;GO:0005737::cytoplasm;GO:0006402::mRNA catabolic process;GO:0016021::integral component of membrane;GO:0046872::metal ion binding
NC_037638.1	3648260	3648553	3648408;3648399;3648441	240	209	305	141	128	136	3.04865	2.7216	4.34214	1.97522	1.74795	2.37421	2.33575	2.08518	3.32677	1.51333	1.33921	1.81902	0.729863	0.10016	1	+	+	+	-	-	-	Intron (XM_026439141.1/409780, intron 3 of 16)	3291485	3679215	387731	2	409780	#NAME?	30662	GO:0003676::nucleic acid binding;GO:0003723::RNA binding;GO:0004535::poly(A)-specific ribonuclease activity;GO:0005634::nucleus;GO:0005737::cytoplasm;GO:0006402::mRNA catabolic process;GO:0016021::integral component of membrane;GO:0046872::metal ion binding
NC_037638.1	3697608	3698077	3697757;3697783;3697729	381	364	403	181	210	168	4.8323	4.7304	5.73276	2.53162	2.85905	2.92877	2.31591	2.26708	2.74747	1.2133	1.37022	1.40363	0.878545	0.0102971	1	+	+	+	-	-	-	Intron (XM_026439162.1/409780, intron 1 of 13)	3291485	3682271	390787	2	409780	#NAME?	-15337	GO:0003676::nucleic acid binding;GO:0003723::RNA binding;GO:0004535::poly(A)-specific ribonuclease activity;GO:0005634::nucleus;GO:0005737::cytoplasm;GO:0006402::mRNA catabolic process;GO:0016021::integral component of membrane;GO:0046872::metal ion binding
NC_037638.1	3588047	3588351	3588190;3588209;3588236	214	295	192	94	163	88	2.71975	3.83616	2.73867	1.32145	2.2222	1.54237	2.00861	2.83311	2.02258	0.975927	1.64116	1.13908	0.869853	0.0420165	1	+	+	+	-	-	-	Intron (XM_026439141.1/409780, intron 3 of 16)	3291485	3552036	260552	2	409780	#NAME?	-36011	GO:0003676::nucleic acid binding;GO:0003723::RNA binding;GO:0004535::poly(A)-specific ribonuclease activity;GO:0005634::nucleus;GO:0005737::cytoplasm;GO:0006402::mRNA catabolic process;GO:0016021::integral component of membrane;GO:0046872::metal ion binding
NC_037638.1	3632718	3633118	3632870;3632938;3632991	388	312	410	182	124	93	4.92085	4.05648	5.83209	2.54553	1.69375	1.62902	2.76415	2.27862	3.27602	1.42988	0.951418	0.915058	1.3355	0.0129299	1	+	+	+	-	-	-	Intron (XM_026439141.1/409780, intron 3 of 16)	3291485	3679215	387731	2	409780	#NAME?	46097	GO:0003676::nucleic acid binding;GO:0003723::RNA binding;GO:0004535::poly(A)-specific ribonuclease activity;GO:0005634::nucleus;GO:0005737::cytoplasm;GO:0006402::mRNA catabolic process;GO:0016021::integral component of membrane;GO:0046872::metal ion binding
NC_037638.1	3626034	3626530	3626213;3626223;3626245	523	387	458	199	192	172	6.6286	5.02848	6.51321	2.782	2.61515	2.99809	3.00422	2.27901	2.95192	1.26086	1.18524	1.3588	1.11394	0.0202346	1	+	+	+	-	-	-	Intron (XM_026439141.1/409780, intron 3 of 16)	3291485	3679215	387731	2	409780	#NAME?	52685	GO:0003676::nucleic acid binding;GO:0003723::RNA binding;GO:0004535::poly(A)-specific ribonuclease activity;GO:0005634::nucleus;GO:0005737::cytoplasm;GO:0006402::mRNA catabolic process;GO:0016021::integral component of membrane;GO:0046872::metal ion binding
NC_037638.1	3464460	3464853	3464647;3464647;3464627	247	321	365	128	134	140	3.1372	4.17312	5.19354	1.79439	1.82925	2.44353	1.79355	2.38578	2.96916	1.02586	1.04579	1.39697	1.04328	0.0556269	1	+	+	+	-	-	-	Intron (XM_026439190.1/409780, intron 2 of 14)	3291485	3552036	260552	2	409780	#NAME?	87183	GO:0003676::nucleic acid binding;GO:0003723::RNA binding;GO:0004535::poly(A)-specific ribonuclease activity;GO:0005634::nucleus;GO:0005737::cytoplasm;GO:0006402::mRNA catabolic process;GO:0016021::integral component of membrane;GO:0046872::metal ion binding
NC_037638.1	3648839	3649094	3648939;3648946;3648988	234	206	186	181	132	100	2.97275	2.68272	2.65353	2.53162	1.80215	1.75033	2.61568	2.36049	2.3348	2.22754	1.58569	1.54009	0.449631	0.0832208	1	+	+	+	-	-	-	Intron (XM_026439141.1/409780, intron 3 of 16)	3291485	3679215	387731	2	409780	#NAME?	30121	GO:0003676::nucleic acid binding;GO:0003723::RNA binding;GO:0004535::poly(A)-specific ribonuclease activity;GO:0005634::nucleus;GO:0005737::cytoplasm;GO:0006402::mRNA catabolic process;GO:0016021::integral component of membrane;GO:0046872::metal ion binding
NC_037638.1	3636996	3637477	3637201;3637199;3637246	449	411	624	148	233	193	5.6925	5.33952	8.86875	2.07259	3.1707	3.36202	2.66025	2.49529	4.14459	0.968574	1.48175	1.57116	1.20953	0.0650169	1	+	+	+	-	-	-	Intron (XM_026439141.1/409780, intron 3 of 16)	3291485	3679215	387731	2	409780	#NAME?	41738	GO:0003676::nucleic acid binding;GO:0003723::RNA binding;GO:0004535::poly(A)-specific ribonuclease activity;GO:0005634::nucleus;GO:0005737::cytoplasm;GO:0006402::mRNA catabolic process;GO:0016021::integral component of membrane;GO:0046872::metal ion binding
NC_037638.1	3634124	3634484	3634312;3634297;3634309	281	236	420	153	155	123	3.5673	3.07152	5.97399	2.14214	2.1138	2.14892	2.22587	1.91652	3.72755	1.33662	1.31893	1.34085	0.977651	0.14726	1	+	+	+	-	-	-	Intron (XM_026439141.1/409780, intron 3 of 16)	3291485	3679215	387731	2	409780	#NAME?	44731	GO:0003676::nucleic acid binding;GO:0003723::RNA binding;GO:0004535::poly(A)-specific ribonuclease activity;GO:0005634::nucleus;GO:0005737::cytoplasm;GO:0006402::mRNA catabolic process;GO:0016021::integral component of membrane;GO:0046872::metal ion binding
NC_037638.1	3624611	3624968	3624775;3624763;3624777	667	418	527	124	122	95	8.4502	5.43024	7.49232	1.73875	1.66665	1.66368	5.3168	3.41667	4.71411	1.09401	1.04864	1.04677	2.07598	0.0257676	1	+	+	+	-	-	-	Intron (XM_026439141.1/409780, intron 3 of 16)	3291485	3679215	387731	2	409780	#NAME?	54247	GO:0003676::nucleic acid binding;GO:0003723::RNA binding;GO:0004535::poly(A)-specific ribonuclease activity;GO:0005634::nucleus;GO:0005737::cytoplasm;GO:0006402::mRNA catabolic process;GO:0016021::integral component of membrane;GO:0046872::metal ion binding
NC_037649.1	7431508	7431991	7431637;7431869;7431624;7431855;7431899	268	329	395	217	200	158	3.40285	4.2768	5.61924	3.03238	2.72355	2.75547	1.58367	1.9904	2.61516	1.41125	1.26752	1.28238	0.643837	0.128611	1	+	+	+	-	-	-	Intron (XM_026444430.1/409783, intron 5 of 15)	7367140	7407629	40490	2	409783	#NAME?	-23879	GO:0003677::DNA binding;GO:0006606::protein import into nucleus
NC_037649.1	7373669	7374099	7373962;7373963;7373784;7373981	432	475	414	166	190	131	5.47745	6.16896	5.88885	2.32297	2.58805	2.28756	2.86265	3.22405	3.07765	1.21404	1.35258	1.19553	1.28447	0.000769591	1	+	+	+	-	-	-	Exon (XM_016915529.2/409783, exon 5 of 11)	7367140	7388155	21016	2	409783	#NAME?	14056	GO:0003677::DNA binding;GO:0006606::protein import into nucleus
NC_037649.1	7642068	7642342	7642218;7642226;7642223	568	552	478	348	318	212	7.19785	7.16688	6.79701	4.85459	4.32245	3.69129	5.89572	5.87035	5.56739	3.97637	3.54049	3.02351	0.717633	0.00769643	1	+	+	+	-	-	-	Promoter (2-3kb)	7367140	7640036	272897	2	409783	#NAME?	-2032	GO:0003677::DNA binding;GO:0006606::protein import into nucleus
NC_037649.1	7502232	7502615	7502420;7502456;7502433	234	322	279	138	185	90	2.97275	4.18608	3.9732	1.93349	2.5203	1.57703	1.74379	2.45552	2.33064	1.13417	1.47838	0.925071	0.884291	0.0249529	1	+	+	+	-	-	-	Intron (XM_026444430.1/409783, intron 3 of 15)	7367140	7532749	165610	2	409783	#NAME?	30134	GO:0003677::DNA binding;GO:0006606::protein import into nucleus
NC_037649.1	7644199	7644543	7644341;7644371;7644379	787	658	587	337	325	346	9.9682	8.54064	8.34372	4.70158	4.4173	6.01351	6.50825	5.57619	5.44762	3.06967	2.88406	3.92623	0.82742	0.00533614	1	+	+	+	-	-	-	Distal Intergenic	7367140	7640036	272897	2	409783	#NAME?	-4163	GO:0003677::DNA binding;GO:0006606::protein import into nucleus
NC_037643.1	4422670	4422968	4422793;4422792;4422835	245	241	221	146	174	100	3.1119	3.13632	3.15018	2.04477	2.37125	1.75033	2.34434	2.36274	2.37318	1.54042	1.78638	1.31861	0.607998	0.0262182	1	+	+	+	-	-	-	Intron (XM_026441392.1/409786, intron 1 of 17)	4243003	4432115	189113	2	409786	#NAME?	9147	GO:0003779::actin binding;GO:0016020::membrane;GO:0017048::Rho GTPase binding;GO:0030036::actin cytoskeleton organization
NC_037639.1	4459748	4460058	4459897;4459901;4459910	286	251	278	186	182	132	3.63055	3.26592	3.95901	2.60117	2.47965	2.30489	2.62953	2.36544	2.86743	1.88397	1.79596	1.66938	0.555615	0.016746	1	+	+	+	-	-	-	Distal Intergenic	4464679	4468976	4298	2	409791	#NAME?	8918	GO:0003677::DNA binding;GO:0004672::protein kinase activity;GO:0005515::protein binding;GO:0005524::ATP binding;GO:0006468::protein phosphorylation;GO:0006777::Mo-molybdopterin cofactor biosynthetic process;GO:0008270::zinc ion binding;GO:0019008::molybdopterin synthase complex;GO:0045893::positive regulation of transcription, DNA-templated;GO:0051539::4 iron, 4 sulfur cluster binding;GO:1902208:…
NC_037644.1	3016349	3016753	3016626;3016599;3016600	349	370	354	203	261	142	4.4275	4.80816	5.03745	2.83764	3.5501	2.47819	2.46246	2.67418	2.8017	1.57822	1.97448	1.37831	0.686956	0.0137401	1	+	+	+	-	-	-	Promoter (<=1kb)	3017741	3023131	5391	1	409801	#NAME?	-988	GO:0008152::metabolic process;GO:0016787::hydrolase activity
NC_037644.1	3041803	3042040	3041911;3041906;3041922	291	247	219	208	238	237	3.6938	3.21408	3.1218	2.90719	3.23845	4.12454	3.49593	3.04191	2.95457	2.75146	3.06497	3.9036	-0.0341859	0.855908	1	+	+	+	-	-	-	Distal Intergenic	3030597	3031897	1301	1	409802	#NAME?	11206	GO:0003677::DNA binding;GO:0003700::sequence-specific DNA binding transcription factor activity;GO:0003899::DNA-directed RNA polymerase activity;GO:0004175::endopeptidase activity;GO:0004298::threonine-type endopeptidase activity;GO:0005839::proteasome core complex;GO:0006352::DNA-templated transcription, initiation;GO:0006355::regulation of transcription, DNA-templated;GO:0006511::ubiquitin-depe…
NC_037645.1	12496899	12497189	12497047;12497050;12497064	590	480	454	329	322	293	7.47615	6.23376	6.45645	4.5903	4.37665	5.09502	5.78697	4.82529	4.99767	3.55316	3.38778	3.94384	0.520152	0.0170664	1	+	+	+	-	-	-	Promoter (<=1kb)	12495956	12500534	4579	1	409814	#NAME?	943	GO:0004553::hydrolase activity, hydrolyzing O-glycosyl compounds;GO:0005975::carbohydrate metabolic process
NC_037645.1	12495111	12495473	12495300;12495289;12495299	605	625	756	348	347	367	7.6659	8.11296	10.7418	4.85459	4.7154	6.37744	4.75689	5.0343	6.66556	3.0124	2.92603	3.95737	0.733793	0.0461699	1	+	+	+	-	-	-	Promoter (<=1kb)	12495956	12500534	4579	1	409814	#NAME?	-483	GO:0004553::hydrolase activity, hydrolyzing O-glycosyl compounds;GO:0005975::carbohydrate metabolic process
NC_037643.1	1481440	1481755	1481575;1481590;1481583	225	320	230	193	148	153	2.8589	4.16016	3.27789	2.69854	2.01895	2.66882	2.03788	2.96544	2.33654	1.92357	1.43915	1.90239	0.479291	0.110549	1	+	+	+	-	-	-	Intron (XM_026441101.1/409817, intron 1 of 10)	1441503	1640226	198724	1	409817	#NAME?	39937	GO:0003993::acid phosphatase activity;GO:0005515::protein binding;GO:0005576::extracellular region;GO:0007339::binding of sperm to zona pellucida;GO:0046872::metal ion binding
NC_037643.1	1581187	1581671	1581350;1581535;1581542;1581548	276	349	340	191	212	149	3.50405	4.536	4.83879	2.67072	2.88615	2.5995	1.6274	2.10668	2.2473	1.24038	1.34043	1.2073	0.659004	0.0543959	1	+	+	+	-	-	-	Intron (XM_026441101.1/409817, intron 3 of 10)	1568908	1636154	67247	1	409817	NM_001040235.2	12279	GO:0003993::acid phosphatase activity;GO:0005515::protein binding;GO:0005576::extracellular region;GO:0007339::binding of sperm to zona pellucida;GO:0046872::metal ion binding
NC_037643.1	1590366	1590668	1590511;1590519;1590506	227	327	252	158	173	149	2.8842	4.25088	3.59007	2.21169	2.3577	2.5995	2.14412	3.16011	2.66887	1.64418	1.75272	1.93247	0.581176	0.0854631	1	+	+	+	-	-	-	Intron (XM_026441101.1/409817, intron 3 of 10)	1568908	1636154	67247	1	409817	NM_001040235.2	21458	GO:0003993::acid phosphatase activity;GO:0005515::protein binding;GO:0005576::extracellular region;GO:0007339::binding of sperm to zona pellucida;GO:0046872::metal ion binding
NC_037639.1	15697505	15698033	15697818;15697748;15697694;15697859	437	685	749	307	256	193	5.5407	8.89056	10.6425	4.28428	3.48235	3.36202	2.35926	3.78565	4.53163	1.82427	1.4828	1.43157	1.1719	0.0848971	1	+	+	+	-	-	-	5' UTR	15692317	15766954	74638	1	409821	#NAME?	5188	GO:0003993::acid phosphatase activity;GO:0004672::protein kinase activity;GO:0004871::signal transducer activity;GO:0005509::calcium ion binding;GO:0005515::protein binding;GO:0005524::ATP binding;GO:0005576::extracellular region;GO:0006468::protein phosphorylation;GO:0007160::cell-matrix adhesion;GO:0016020::membrane;GO:0016773::phosphotransferase activity, alcohol group as acceptor;GO:0043123::…
NC_037650.1	4421705	4421956	4421802;4421823;4421848	278	263	229	169	222	122	3.52935	3.42144	3.2637	2.3647	3.02165	2.13159	3.15472	3.05826	2.91727	2.11369	2.70091	1.90533	0.442208	0.067913	1	+	+	+	-	-	-	Exon (XM_006559333.3/409827, exon 3 of 11)	4415439	4428088	12650	2	409827	#NAME?	6132	GO:0001772::immunological synapse;GO:0004252::serine-type endopeptidase activity;GO:0005515::protein binding;GO:0005744::mitochondrial inner membrane presequence translocase complex;GO:0006508::proteolysis;GO:0012511::monolayer-surrounded lipid storage body;GO:0016021::integral component of membrane;GO:0030150::protein import into mitochondrial matrix;GO:0097197::tetraspanin-enriched microdomain
NC_037650.1	4420215	4421498	4420318;4421024;4421338;4420340;4420828;4421090;4421332;4420761;4421360	1152	1260	1170	693	753	558	14.5854	16.3426	16.6165	9.65354	10.2167	9.68747	2.5587	2.86697	2.91502	1.69351	1.79231	1.69946	0.685744	0.00728607	1	+	+	+	-	-	-	Exon (XM_006559333.3/409827, exon 4 of 11)	4415439	4428088	12650	2	409827	#NAME?	6590	GO:0001772::immunological synapse;GO:0004252::serine-type endopeptidase activity;GO:0005515::protein binding;GO:0005744::mitochondrial inner membrane presequence translocase complex;GO:0006508::proteolysis;GO:0012511::monolayer-surrounded lipid storage body;GO:0016021::integral component of membrane;GO:0030150::protein import into mitochondrial matrix;GO:0097197::tetraspanin-enriched microdomain
NC_037645.1	2322244	2322607	2322428;2322430;2322381	292	431	530	131	84	136	3.70645	5.59872	7.53489	1.83612	1.15175	2.37421	2.29363	3.46461	4.66275	1.13623	0.712727	1.46921	1.65103	0.0628294	1	+	+	+	-	-	-	Exon (XM_006559485.3/409836, exon 19 of 23)	2310171	2333361	23191	2	409836	#NAME?	10754	GO:0005515::protein binding;GO:0007165::signal transduction
NC_037650.1	3044141	3044563	3044244;3044459;3044444;3044444	290	290	342	214	149	176	3.68115	3.77136	4.86717	2.99065	2.0325	3.06741	1.96024	2.00828	2.59181	1.59255	1.08232	1.63342	0.606653	0.0505574	1	+	+	+	-	-	-	Promoter (1-2kb)	3042633	3047114	4482	1	409846	#NAME?	1508	GO:0003824::catalytic activity;GO:0003922::GMP synthase (glutamine-hydrolyzing) activity;GO:0004055::argininosuccinate synthase activity;GO:0004066::asparagine synthase (glutamine-hydrolyzing) activity;GO:0004810::tRNA adenylyltransferase activity;GO:0005524::ATP binding;GO:0006164::purine nucleotide biosynthetic process;GO:0006177::GMP biosynthetic process;GO:0006526::arginine biosynthetic proce…
NC_037650.1	3046006	3046383	3046164;3046145;3046185	304	420	421	201	147	188	3.85825	5.45616	5.98818	2.80982	2.0054	3.27537	2.29914	3.25134	3.56837	1.67438	1.19502	1.9518	0.919459	0.0431705	1	+	+	+	-	-	-	Exon (XM_393336.7/409846, exon 8 of 9)	3042633	3047114	4482	1	409846	#NAME?	3373	GO:0003824::catalytic activity;GO:0003922::GMP synthase (glutamine-hydrolyzing) activity;GO:0004055::argininosuccinate synthase activity;GO:0004066::asparagine synthase (glutamine-hydrolyzing) activity;GO:0004810::tRNA adenylyltransferase activity;GO:0005524::ATP binding;GO:0006164::purine nucleotide biosynthetic process;GO:0006177::GMP biosynthetic process;GO:0006526::arginine biosynthetic proce…
NC_037647.1	3359399	3359920	3359537;3359525;3359557;3359853	293	408	355	244	280	132	3.7191	5.30064	5.05164	3.40795	3.80755	2.30489	1.60485	2.28731	2.17986	1.47058	1.64302	0.994595	0.563671	0.0853716	1	+	+	+	-	-	-	Intron (XM_016914332.2/409849, intron 1 of 9)	3306197	3340289	34093	2	409849	#NAME?	-19110	GO:0003993::acid phosphatase activity;GO:0005515::protein binding;GO:0008948::oxaloacetate decarboxylase activity;GO:0015081::sodium ion transmembrane transporter activity;GO:0016020::membrane;GO:0046872::metal ion binding;GO:0071436::sodium ion export
NC_037653.1	1080981	1081429	1081298;1081293;1081274	651	604	513	360	252	245	8.2478	7.8408	7.29366	5.02151	3.42815	4.26318	4.13769	3.93351	3.65903	2.51915	1.71981	2.13872	0.879128	0.00528841	1	+	+	+	-	-	-	Exon (XM_393344.7/409854, exon 6 of 7)	1077343	1086628	9286	2	409854	#NAME?	5199	GO:0003677::DNA binding;GO:0003848::2-amino-4-hydroxy-6-hydroxymethyldihydropteridine diphosphokinase activity;GO:0006355::regulation of transcription, DNA-templated;GO:0009396::folic acid-containing compound biosynthetic process;GO:0019069::viral capsid assembly;GO:0042025::host cell nucleus
NC_037653.1	1083207	1083817	1083398;1083596;1083406;1083385;1083587;1083702	1146	1514	1709	812	740	851	14.5095	19.6344	24.2649	11.3088	10.0405	14.7652	5.34906	7.23841	8.94548	4.1691	3.70152	5.44333	0.693608	0.101188	1	+	+	+	-	-	-	Promoter (2-3kb)	1077343	1086628	9286	2	409854	#NAME?	2811	GO:0003677::DNA binding;GO:0003848::2-amino-4-hydroxy-6-hydroxymethyldihydropteridine diphosphokinase activity;GO:0006355::regulation of transcription, DNA-templated;GO:0009396::folic acid-containing compound biosynthetic process;GO:0019069::viral capsid assembly;GO:0042025::host cell nucleus
NC_037640.1	10814245	10814678	10814470;10814475;10814425	579	740	811	339	348	302	7.337	9.60336	11.5223	4.7294	4.72895	5.25099	3.80799	4.98425	5.9802	2.45461	2.45438	2.72532	0.952338	0.0603471	1	+	+	+	-	-	-	Promoter (2-3kb)	10728999	10811942	82944	2	409856	#NAME?	-2303	GO:0005085::guanyl-nucleotide exchange factor activity;GO:0007264::small GTPase mediated signal transduction
NC_037642.1	9583174	9583664	9583354;9583370;9583341	355	378	323	208	182	164	4.5034	4.91184	4.59756	2.90719	2.47965	2.85945	2.06598	2.25335	2.10917	1.3337	1.13756	1.3118	0.764928	0.000486256	1	+	+	+	-	-	-	Promoter (<=1kb)	9582174	9584789	2616	1	409867	#NAME?	1000	GO:0005198::structural molecule activity;GO:0019031::viral envelope
NC_037640.1	6912806	6913088	6912921;6912938;6912945	466	409	332	220	153	124	5.90755	5.3136	4.72527	3.07411	2.0867	2.16625	4.70205	4.2293	3.76103	2.44681	1.66089	1.7242	1.12193	0.00356692	1	+	+	+	-	-	-	5' UTR	6901482	6917237	15756	2	409872	#NAME?	4149	.
NC_037642.1	6668409	6668716	6668563;6668562;6668564	469	602	633	337	275	289	5.9455	7.81488	8.99646	4.70158	3.7398	5.0257	4.34815	5.71529	6.57942	3.43843	2.73504	3.67547	0.756863	0.0563223	1	+	+	+	-	-	-	Promoter (1-2kb)	6640287	6670243	29957	2	409882	#NAME?	1527	GO:0000372::Group I intron splicing;GO:0000746::conjugation;GO:0004222::metalloendopeptidase activity;GO:0005179::hormone activity;GO:0005576::extracellular region;GO:0007275::multicellular organismal development;GO:0008270::zinc ion binding;GO:0016021::integral component of membrane;GO:0019867::outer membrane;GO:0030529::ribonucleoprotein complex
NC_037642.1	6646447	6646673	6646541;6646555;6646564	322	274	250	194	146	151	4.08595	3.564	3.56169	2.71245	1.99185	2.63416	4.05447	3.53654	3.53425	2.69155	1.9765	2.61386	0.611448	0.012658	1	+	+	+	-	-	-	Intron (XM_016912174.2/409882, intron 1 of 3)	6640287	6653864	13578	2	409882	#NAME?	7191	GO:0000372::Group I intron splicing;GO:0000746::conjugation;GO:0004222::metalloendopeptidase activity;GO:0005179::hormone activity;GO:0005576::extracellular region;GO:0007275::multicellular organismal development;GO:0008270::zinc ion binding;GO:0016021::integral component of membrane;GO:0019867::outer membrane;GO:0030529::ribonucleoprotein complex
NC_037642.1	6657163	6657465	6657293;6657318;6657305	249	274	281	267	251	147	3.1625	3.564	4.00158	3.72788	3.4146	2.56484	2.35101	2.64949	2.97478	2.77131	2.53842	1.90671	0.144247	0.471832	1	+	+	+	-	-	-	Promoter (1-2kb)	6640287	6658481	18195	2	409882	#NAME?	1016	GO:0000372::Group I intron splicing;GO:0000746::conjugation;GO:0004222::metalloendopeptidase activity;GO:0005179::hormone activity;GO:0005576::extracellular region;GO:0007275::multicellular organismal development;GO:0008270::zinc ion binding;GO:0016021::integral component of membrane;GO:0019867::outer membrane;GO:0030529::ribonucleoprotein complex
NC_037642.1	6666421	6666792	6666559;6666609;6666613	570	719	720	397	285	315	7.22315	9.3312	10.231	5.53618	3.8753	5.47628	4.37371	5.65016	6.195	3.35223	2.34655	3.31596	0.847317	0.0269732	1	+	+	+	-	-	-	Exon (XM_016912172.2/409882, exon 3 of 6)	6640287	6670243	29957	2	409882	#NAME?	3451	GO:0000372::Group I intron splicing;GO:0000746::conjugation;GO:0004222::metalloendopeptidase activity;GO:0005179::hormone activity;GO:0005576::extracellular region;GO:0007275::multicellular organismal development;GO:0008270::zinc ion binding;GO:0016021::integral component of membrane;GO:0019867::outer membrane;GO:0030529::ribonucleoprotein complex
NC_037642.1	6665576	6665988	6665703;6665789;6665736	671	630	536	502	377	286	8.5008	8.17776	7.62003	6.99673	5.1219	4.97371	4.63635	4.46016	4.15598	3.81603	2.79349	2.71267	0.507523	0.0512491	1	+	+	+	-	-	-	Intron (XM_016912172.2/409882, intron 3 of 5)	6640287	6670243	29957	2	409882	#NAME?	4255	GO:0000372::Group I intron splicing;GO:0000746::conjugation;GO:0004222::metalloendopeptidase activity;GO:0005179::hormone activity;GO:0005576::extracellular region;GO:0007275::multicellular organismal development;GO:0008270::zinc ion binding;GO:0016021::integral component of membrane;GO:0019867::outer membrane;GO:0030529::ribonucleoprotein complex
NC_037641.1	7862500	7863192	7862634;7863039;7862688;7863028;7863033	448	504	624	302	200	207	5.67985	6.5448	8.86875	4.21473	2.72355	3.60464	1.84616	2.1273	2.88268	1.36994	0.885255	1.17164	1.00052	0.0485414	1	+	+	+	-	-	-	Promoter (2-3kb)	7860111	7864269	4159	1	409883	#NAME?	2389	GO:0003723::RNA binding;GO:0005515::protein binding;GO:0006396::RNA processing
NC_037653.1	5147940	5148281	5148105;5148073;5148125	292	390	411	192	136	184	3.70645	5.06736	5.84628	2.68463	1.85635	3.20605	2.44117	3.33751	3.85053	1.76817	1.22264	2.1116	0.916237	0.0455917	1	+	+	+	-	-	-	Promoter (1-2kb)	5146775	5149619	2845	2	409890	#NAME?	1338	GO:0000413::protein peptidyl-prolyl isomerization;GO:0003755::peptidyl-prolyl cis-trans isomerase activity;GO:0006457::protein folding
NC_037653.1	5155330	5155739	5155511;5155550;5155549	279	326	387	183	160	137	3.542	4.23792	5.50572	2.55944	2.18155	2.39154	1.94595	2.32828	3.0248	1.40614	1.19853	1.31389	0.897382	0.0656294	1	+	+	+	-	-	-	Intron (XM_006561339.3/409891, intron 8 of 14)	5150945	5159759	8815	1	409891	#NAME?	4385	GO:0009306::protein secretion;GO:0016020::membrane
NC_037640.1	8226089	8226369	8226218;8226250;8226254	288	248	248	126	117	106	3.65585	3.22704	3.53331	1.76657	1.5989	1.85431	2.93055	2.58681	2.83232	1.41609	1.28169	1.48642	0.996768	0.000931512	1	+	+	+	-	-	-	Intron (XM_006563943.3/409893, intron 1 of 11)	8215549	8249707	34159	1	409893	#NAME?	10540	GO:0000287::magnesium ion binding;GO:0003676::nucleic acid binding;GO:0003677::DNA binding;GO:0009036::Type II site-specific deoxyribonuclease activity;GO:0009307::DNA restriction-modification system
NC_037643.1	6569780	6570110	6569944;6569948;6569948	272	352	423	158	140	139	3.45345	4.57488	6.01656	2.21169	1.91055	2.4262	2.35013	3.11328	4.09437	1.50509	1.30016	1.65107	1.10082	0.0726267	1	+	+	+	-	-	-	Exon (XM_026441439.1/409898, exon 11 of 16)	6576315	6594147	17833	1	409897	#NAME?	-6205	GO:0000166::nucleotide binding;GO:0002949::tRNA threonylcarbamoyladenosine modification;GO:0003677::DNA binding;GO:0003735::structural constituent of ribosome;GO:0003924::GTPase activity;GO:0005524::ATP binding;GO:0005525::GTP binding;GO:0005840::ribosome;GO:0006412::translation;GO:0006810::transport;GO:0007264::small GTPase mediated signal transduction;GO:0016021::integral component of membrane;…
NC_037640.1	1447380	1447682	1447542;1447529;1447530	266	344	320	265	194	133	3.37755	4.4712	4.55499	3.70006	2.64225	2.32222	2.51088	3.3239	3.38619	2.75063	1.96425	1.72634	0.517582	0.0918924	1	+	+	+	-	-	-	Downstream (<1kb)	1447694	1451461	3768	2	409900	#NAME?	3779	GO:0006139::nucleobase-containing compound metabolic process;GO:0008168::methyltransferase activity
NC_037640.1	1445374	1445617	1445478;1445488;1445505	244	242	212	236	180	126	3.09925	3.14928	3.02247	3.29667	2.45255	2.20091	2.8611	2.90729	2.79022	3.04335	2.26409	2.03179	0.221747	0.314819	1	+	+	+	-	-	-	Downstream (2-3kb)	1447694	1451461	3768	2	409900	#NAME?	5844	GO:0006139::nucleobase-containing compound metabolic process;GO:0008168::methyltransferase activity
NC_037640.1	1449398	1449703	1449545;1449543;1449540	346	405	430	294	228	158	4.38955	5.26176	6.11589	4.10345	3.10295	2.75547	3.23121	3.87326	4.50199	3.02061	2.28412	2.02834	0.662438	0.04149	1	+	+	+	-	-	-	Promoter (1-2kb)	1447694	1451461	3768	2	409900	#NAME?	1758	GO:0006139::nucleobase-containing compound metabolic process;GO:0008168::methyltransferase activity
NC_037651.1	6809204	6809592	6809423;6809420;6809371	245	351	405	134	121	99	3.1119	4.56192	5.76114	1.87785	1.6531	1.733	1.80195	2.64158	3.33599	1.08737	0.957229	1.0035	1.35177	0.0697438	1	+	+	+	-	-	-	Promoter (1-2kb)	6798247	6811564	13318	2	409902	#NAME?	1972	GO:0005515::protein binding;GO:0005856::cytoskeleton;GO:0008092::cytoskeletal protein binding;GO:0016021::integral component of membrane;GO:0019048::modulation by virus of host morphology or physiology;GO:0030430::host cell cytoplasm;GO:0030866::cortical actin cytoskeleton organization;GO:0060967::negative regulation of gene silencing by RNA
NC_037648.1	15614333	15614565	15614454;15614462;15614469	802	670	506	481	430	292	10.1579	8.69616	7.19433	6.70462	5.84005	5.07769	9.82007	8.40694	6.95506	6.48164	5.64582	4.90882	0.563787	0.0610679	1	+	+	+	-	-	-	Intron (XM_006570310.3/409904, intron 8 of 17)	15586403	15606613	20211	2	409904	#NAME?	-7720	GO:0005149::interleukin-1 receptor binding;GO:0005515::protein binding;GO:0005634::nucleus;GO:0006954::inflammatory response;GO:0006955::immune response;GO:0033743::peptide-methionine (R)-S-oxide reductase activity;GO:0055114::oxidation-reduction process
NC_037648.1	15626189	15626456	15626313;15626325;15626325	442	512	436	278	299	233	5.60395	6.64848	6.20103	3.88089	4.065	4.05522	4.71005	5.58797	5.21189	3.26184	3.41659	3.40837	0.620723	0.0162908	1	+	+	+	-	-	-	Promoter (<=1kb)	15586403	15625977	39575	2	409904	#NAME?	-212	GO:0005149::interleukin-1 receptor binding;GO:0005515::protein binding;GO:0005634::nucleus;GO:0006954::inflammatory response;GO:0006955::immune response;GO:0033743::peptide-methionine (R)-S-oxide reductase activity;GO:0055114::oxidation-reduction process
NC_037638.1	27655366	27655951	27655671;27655676;27655674	430	411	516	259	245	198	5.45215	5.33952	7.33623	3.6166	3.3333	3.44867	2.09574	2.05244	2.81995	1.39017	1.28128	1.32562	0.801827	0.0556408	1	+	+	+	-	-	-	Intron (XM_026442083.1/409923, intron 3 of 13)	27659307	27676248	16942	1	409923	#NAME?	-3356	GO:0004222::metalloendopeptidase activity;GO:0006486::protein glycosylation;GO:0006508::proteolysis;GO:0007155::cell adhesion;GO:0008373::sialyltransferase activity;GO:0009055::electron carrier activity;GO:0016020::membrane;GO:0051536::iron-sulfur cluster binding
NC_037638.1	27613775	27614030	27613899;27613902;27613907	257	225	235	209	187	149	3.2637	2.92896	3.34884	2.9211	2.5474	2.5995	2.87168	2.57715	2.9466	2.57024	2.24142	2.28726	0.242005	0.047708	1	+	+	+	-	-	-	Intron (XM_026442083.1/409923, intron 1 of 13)	27591144	27676248	85105	1	409923	#NAME?	22631	GO:0004222::metalloendopeptidase activity;GO:0006486::protein glycosylation;GO:0006508::proteolysis;GO:0007155::cell adhesion;GO:0008373::sialyltransferase activity;GO:0009055::electron carrier activity;GO:0016020::membrane;GO:0051536::iron-sulfur cluster binding
NC_037638.1	27674318	27674760	27674543;27674491;27674550	344	323	347	223	122	75	4.36425	4.19904	4.93812	3.11584	1.66665	1.31708	2.21908	2.13507	2.51087	1.5843	0.847437	0.669692	1.14633	0.0323539	1	+	+	+	-	-	-	3' UTR	27659307	27676248	16942	1	409923	#NAME?	15011	GO:0004222::metalloendopeptidase activity;GO:0006486::protein glycosylation;GO:0006508::proteolysis;GO:0007155::cell adhesion;GO:0008373::sialyltransferase activity;GO:0009055::electron carrier activity;GO:0016020::membrane;GO:0051536::iron-sulfur cluster binding
NC_037638.1	9289285	9289612	9289443;9289461;9289464	524	404	252	125	129	58	6.64125	5.2488	3.59007	1.75266	1.7615	1.02247	4.56082	3.60456	2.46545	1.20362	1.20969	0.702172	1.77072	0.0452669	1	+	+	+	-	-	-	Promoter (1-2kb)	9274925	9287746	12822	2	409924	#NAME?	-1539	GO:0007155::cell adhesion;GO:0008270::zinc ion binding;GO:0009056::catabolic process;GO:0016021::integral component of membrane;GO:0022857::transmembrane transporter activity;GO:0042246::tissue regeneration;GO:0055085::transmembrane transport
NC_037638.1	9277409	9277803	9277603;9277622;9277611	337	474	468	148	149	149	4.2757	6.156	6.65511	2.07259	2.0325	2.5995	2.43824	3.51049	3.79511	1.18191	1.15904	1.48238	1.34966	0.0345481	1	+	+	+	-	-	-	Promoter (1-2kb)	9274925	9279777	4853	2	409924	#NAME?	1974	GO:0007155::cell adhesion;GO:0008270::zinc ion binding;GO:0009056::catabolic process;GO:0016021::integral component of membrane;GO:0022857::transmembrane transporter activity;GO:0042246::tissue regeneration;GO:0055085::transmembrane transport
NC_037643.1	7406669	7407018	7406846;7406844;7406856	449	504	466	297	307	205	5.6925	6.5448	6.62673	4.14518	4.1734	3.56998	3.66354	4.21206	4.26479	2.66773	2.68589	2.29755	0.666064	0.00470769	1	+	+	+	-	-	-	Intron (XM_393419.7/409928, intron 1 of 9)	7322449	7435260	112812	2	409928	#NAME?	28242	GO:0006368::transcription elongation from RNA polymerase II promoter;GO:0008023::transcription elongation factor complex;GO:0019033::viral tegument
NC_037643.1	7422680	7423076	7422831;7422815;7422819	310	286	365	151	122	146	3.93415	3.71952	5.19354	2.11432	1.66665	2.54751	2.23217	2.11039	2.94672	1.19963	0.945628	1.44541	1.02152	0.0237881	1	+	+	+	-	-	-	Intron (XM_393419.7/409928, intron 1 of 9)	7322449	7435260	112812	2	409928	#NAME?	12184	GO:0006368::transcription elongation from RNA polymerase II promoter;GO:0008023::transcription elongation factor complex;GO:0019033::viral tegument
NC_037643.1	7418982	7419550	7419102;7419386;7419135;7419418;7419108;7419408	434	442	437	274	227	179	5.50275	5.74128	6.21522	3.82525	3.0894	3.1194	2.17838	2.27281	2.46043	1.51431	1.22301	1.23488	0.799088	0.00160155	1	+	+	+	-	-	-	Intron (XM_393419.7/409928, intron 1 of 9)	7322449	7435260	112812	2	409928	#NAME?	15710	GO:0006368::transcription elongation from RNA polymerase II promoter;GO:0008023::transcription elongation factor complex;GO:0019033::viral tegument
NC_037644.1	9580320	9580690	9580511;9580515;9580516	798	615	495	402	367	195	10.1074	7.98336	7.03824	5.60573	4.9864	3.39668	6.13666	4.84706	4.27323	3.40349	3.02747	2.06228	0.84508	0.0339454	1	+	+	+	-	-	-	Intron (XM_026441915.1/409933, intron 2 of 13)	9577046	9604553	27508	1	409933	#NAME?	3274	GO:0016021::integral component of membrane;GO:0022857::transmembrane transporter activity;GO:0055085::transmembrane transport
NC_037638.1	19768507	19769177	19768828;19768793;19768790	472	737	657	419	358	270	5.98345	9.56448	9.33702	5.8422	4.86445	4.69643	2.00861	3.21074	3.13438	1.96119	1.63297	1.57656	0.692055	0.101331	1	+	+	+	-	-	-	Exon (XM_026439072.1/409936, exon 5 of 6)	19768119	19773361	5243	2	409936	#NAME?	4184	GO:0005198::structural molecule activity;GO:0005515::protein binding;GO:0019013::viral nucleocapsid;GO:0019031::viral envelope;GO:0046872::metal ion binding
NC_037638.1	19765302	19765721	19765564;19765521;19765576	340	404	394	429	253	135	4.31365	5.2488	5.60505	5.9813	3.4417	2.35688	2.31346	2.81499	3.00605	3.20784	1.84582	1.26402	0.364658	0.408039	1	+	+	+	-	-	-	3' UTR	19768119	19773361	5243	2	409936	#NAME?	7640	GO:0005198::structural molecule activity;GO:0005515::protein binding;GO:0019013::viral nucleocapsid;GO:0019031::viral envelope;GO:0046872::metal ion binding
NC_037648.1	15371079	15371376	15371229;15371222;15371237	277	306	340	173	144	149	3.5167	3.97872	4.83879	2.42034	1.96475	2.5995	2.65819	3.00742	3.65752	1.82948	1.48511	1.9649	0.820418	0.02735	1	+	+	+	-	-	-	Promoter (2-3kb)	15368728	15375727	7000	1	409942	#NAME?	2351	GO:0003993::acid phosphatase activity;GO:0005515::protein binding;GO:0046872::metal ion binding
NC_037639.1	658579	658931	658724;658711;658704	240	348	254	122	104	82	3.04865	4.52304	3.61845	1.71093	1.42275	1.43839	1.94536	2.88617	2.30895	1.09175	0.907863	0.917843	1.29131	0.0310101	1	+	+	+	-	-	-	Exon (XM_006558101.3/409950, exon 15 of 19)	639479	663432	23954	1	409950	#NAME?	19100	GO:0005509::calcium ion binding;GO:0005515::protein binding;GO:0008158::hedgehog receptor activity;GO:0008948::oxaloacetate decarboxylase activity;GO:0015081::sodium ion transmembrane transporter activity;GO:0016020::membrane;GO:0016055::Wnt signaling pathway;GO:0071436::sodium ion export
NC_037639.1	679344	679770	679618;679641;679604	392	371	303	207	227	165	4.97145	4.82112	4.31376	2.89328	3.0894	2.87678	2.62254	2.54324	2.27559	1.52626	1.62972	1.51756	0.671052	0.00731396	1	+	+	+	-	-	-	Exon (XM_026439030.1/726051, exon 5 of 8)	639479	663432	23954	1	409950	#NAME?	39865	GO:0005509::calcium ion binding;GO:0005515::protein binding;GO:0008158::hedgehog receptor activity;GO:0008948::oxaloacetate decarboxylase activity;GO:0015081::sodium ion transmembrane transporter activity;GO:0016020::membrane;GO:0016055::Wnt signaling pathway;GO:0071436::sodium ion export
NC_037653.1	1172184	1172651	1172458;1172460;1172447	1839	1582	801	485	437	376	23.276	20.5157	11.3804	6.76026	5.9349	6.53341	11.2029	9.87432	5.47745	3.25375	2.8565	3.14456	1.52069	0.078757	1	+	+	+	-	-	-	Promoter (<=1kb)	1149527	1172493	22967	2	409952	#NAME?	0	GO:0004672::protein kinase activity;GO:0005524::ATP binding;GO:0006468::protein phosphorylation;GO:0016020::membrane;GO:0016773::phosphotransferase activity, alcohol group as acceptor
NC_037653.1	1167637	1167966	1167784;1167801;1167800	529	676	677	258	159	229	6.7045	8.77392	9.62082	3.60269	2.168	3.9859	4.57635	5.98889	6.56696	2.45912	1.47983	2.72069	1.36319	0.0115203	1	+	+	+	-	-	-	Exon (XM_026445860.1/409952, exon 7 of 12)	1149527	1172493	22967	2	409952	#NAME?	4527	GO:0004672::protein kinase activity;GO:0005524::ATP binding;GO:0006468::protein phosphorylation;GO:0016020::membrane;GO:0016773::phosphotransferase activity, alcohol group as acceptor
NC_037648.1	2548380	2548625	2548514;2548520;2548523	374	362	291	111	125	103	4.74375	4.70448	4.14348	1.55792	1.7073	1.80232	4.34363	4.30768	3.79399	1.42652	1.5633	1.6503	1.42337	0.00191863	1	+	+	+	-	-	-	Promoter (1-2kb)	2547172	2599896	52725	1	409956	#NAME?	1208	GO:0016791::phosphatase activity
NC_037638.1	6639467	6639767	6639623;6639611;6639625	305	294	306	112	114	58	3.8709	3.8232	4.35633	1.57183	1.55825	1.02247	2.89676	2.86106	3.26002	1.17627	1.1661	0.765157	1.53702	0.00045759	1	+	+	+	-	-	-	Exon (XR_003304637.1/409957, exon 5 of 7)	6634441	6643220	8780	2	409957	#NAME?	3453	GO:0005515::protein binding;GO:0009276::Gram-negative-bacterium-type cell wall;GO:0016021::integral component of membrane
NC_037650.1	4884384	4884792	4884569;4884596;4884584	422	771	756	211	243	281	5.35095	10.0051	10.7418	2.94892	3.3062	4.88706	2.94696	5.51017	5.91589	1.62408	1.82084	2.69148	1.2279	0.0848154	1	+	+	+	-	-	-	Exon (XM_006560415.3/409961, exon 5 of 8)	4880133	4913771	33639	1	409961	#NAME?	4251	GO:0003333::amino acid transmembrane transport;GO:0003676::nucleic acid binding;GO:0005215::transporter activity;GO:0006810::transport;GO:0008948::oxaloacetate decarboxylase activity;GO:0015081::sodium ion transmembrane transporter activity;GO:0015171::amino acid transmembrane transporter activity;GO:0016020::membrane;GO:0016021::integral component of membrane;GO:0071436::sodium ion export
NC_037650.1	4828233	4828529	4828388;4828402;4828340	250	400	416	472	480	285	3.17515	5.19696	5.91723	6.57943	6.51755	4.95638	2.4081	3.94148	4.48775	4.98997	4.94304	3.75902	-0.337328	0.279278	1	+	+	+	-	-	-	Exon (XM_026444794.1/413550, exon 6 of 10)	4833036	4838901	5866	2	409963	#NAME?	10372	GO:0000103::sulfate assimilation;GO:0003873::6-phosphofructo-2-kinase activity;GO:0004020::adenylylsulfate kinase activity;GO:0005524::ATP binding;GO:0006000::fructose metabolic process;GO:0016740::transferase activity;GO:0016887::ATPase activity
NC_037650.1	4826288	4827106	4826367;4826688;4826405;4826703;4826675;4827007	573	829	790	1049	953	561	7.2611	10.7568	11.2243	14.6055	12.9267	9.73946	1.99703	2.95846	3.08704	4.01697	3.55525	2.67866	-0.350027	0.232344	1	+	+	+	-	-	-	Exon (XM_026444794.1/413550, exon 4 of 10)	4833036	4838901	5866	2	409963	#NAME?	11795	GO:0000103::sulfate assimilation;GO:0003873::6-phosphofructo-2-kinase activity;GO:0004020::adenylylsulfate kinase activity;GO:0005524::ATP binding;GO:0006000::fructose metabolic process;GO:0016740::transferase activity;GO:0016887::ATPase activity
NC_037650.1	4836855	4837239	4837109;4837115;4837117	345	441	445	319	304	309	4.3769	5.72832	6.32874	4.4512	4.13275	5.3723	2.56078	3.35145	3.70274	2.60425	2.41794	3.14316	0.235769	0.305662	1	+	+	+	-	-	-	Promoter (1-2kb)	4833036	4838901	5866	2	409963	#NAME?	1662	GO:0000103::sulfate assimilation;GO:0003873::6-phosphofructo-2-kinase activity;GO:0004020::adenylylsulfate kinase activity;GO:0005524::ATP binding;GO:0006000::fructose metabolic process;GO:0016740::transferase activity;GO:0016887::ATPase activity
NC_037650.1	4834485	4834911	4834658;4834655;4834730	351	598	776	531	479	466	4.4528	7.76304	11.0256	7.40012	6.504	8.09311	2.34894	4.09516	5.81622	3.90371	3.43099	4.26927	0.0793776	0.849605	1	+	+	+	-	-	-	3' UTR	4833036	4838901	5866	2	409963	#NAME?	3990	GO:0000103::sulfate assimilation;GO:0003873::6-phosphofructo-2-kinase activity;GO:0004020::adenylylsulfate kinase activity;GO:0005524::ATP binding;GO:0006000::fructose metabolic process;GO:0016740::transferase activity;GO:0016887::ATPase activity
NC_037638.1	16703586	16703962	16703772;16703793;16703822	423	257	219	203	206	124	5.3636	3.34368	3.1218	2.83764	2.80485	2.16625	3.20466	1.99779	1.86522	1.69544	1.67585	1.2943	0.599176	0.19402	1	+	+	+	-	-	-	Intron (XM_026439838.1/409970, intron 2 of 13)	16691313	16712184	20872	2	409970	#NAME?	8222	GO:0004222::metalloendopeptidase activity;GO:0008233::peptidase activity;GO:0031012::extracellular matrix
NC_037641.1	12684847	12685203	12685050;12685051;12685036	287	375	419	154	124	157	3.6432	4.87296	5.9598	2.15605	1.69375	2.73814	2.29869	3.07462	3.76036	1.36037	1.06868	1.72764	1.13576	0.0420418	1	+	+	+	-	-	-	Exon (XM_016911789.2/409983, exon 10 of 28)	12679284	12694681	15398	1	409983	#NAME?	5563	GO:0003723::RNA binding;GO:0004190::aspartic-type endopeptidase activity;GO:0005515::protein binding;GO:0005524::ATP binding;GO:0005634::nucleus;GO:0005789::endoplasmic reticulum membrane;GO:0006810::transport;GO:0006820::anion transport;GO:0006874::cellular calcium ion homeostasis;GO:0008948::oxaloacetate decarboxylase activity;GO:0009607::response to biotic stimulus;GO:0015081::sodium ion trans…
NC_037651.1	6886852	6887501	6887018;6887284;6887174;6887166	346	574	510	311	206	186	4.38955	7.452	7.25109	4.33992	2.80485	3.24071	1.52115	2.58241	2.51279	1.50396	0.971992	1.12304	0.878449	0.0813644	1	+	+	+	-	-	-	Promoter (<=1kb)	6886614	6959179	72566	1	409985	#NAME?	238	GO:0004843::ubiquitin-specific protease activity;GO:0016020::membrane;GO:0016579::protein deubiquitination;GO:0016757::transferase activity, transferring glycosyl groups;GO:0017148::negative regulation of translation;GO:0030598::rRNA N-glycosylase activity;GO:0036459::ubiquitinyl hydrolase activity
NC_037651.1	6894458	6894944	6894615;6894606;6894837;6894604	314	397	394	182	171	128	3.98475	5.15808	5.60505	2.54553	2.3306	2.23557	1.84306	2.38575	2.59249	1.17738	1.07797	1.03401	1.05224	0.0304985	1	+	+	+	-	-	-	Intron (XM_393474.7/409985, intron 11 of 17)	6886614	6959179	72566	1	409985	#NAME?	7844	GO:0004843::ubiquitin-specific protease activity;GO:0016020::membrane;GO:0016579::protein deubiquitination;GO:0016757::transferase activity, transferring glycosyl groups;GO:0017148::negative regulation of translation;GO:0030598::rRNA N-glycosylase activity;GO:0036459::ubiquitinyl hydrolase activity
NC_037651.1	6932213	6932514	6932336;6932390;6932401	225	211	220	160	198	134	2.8589	2.74752	3.13599	2.23951	2.69645	2.33955	2.13235	2.04928	2.33902	1.67037	2.01118	1.74499	0.264983	0.0554624	1	+	+	+	-	-	-	Intron (XM_393474.7/409985, intron 16 of 17)	6886614	6959179	72566	1	409985	#NAME?	45599	GO:0004843::ubiquitin-specific protease activity;GO:0016020::membrane;GO:0016579::protein deubiquitination;GO:0016757::transferase activity, transferring glycosyl groups;GO:0017148::negative regulation of translation;GO:0030598::rRNA N-glycosylase activity;GO:0036459::ubiquitinyl hydrolase activity
NC_037651.1	6891069	6891349	6891203;6891201;6891213	229	304	283	173	133	104	2.9095	3.9528	4.02996	2.42034	1.8157	1.81965	2.33227	3.16858	3.23043	1.94016	1.45547	1.45864	0.84694	0.0277324	1	+	+	+	-	-	-	Intron (XM_393474.7/409985, intron 11 of 17)	6886614	6959179	72566	1	409985	#NAME?	4455	GO:0004843::ubiquitin-specific protease activity;GO:0016020::membrane;GO:0016579::protein deubiquitination;GO:0016757::transferase activity, transferring glycosyl groups;GO:0017148::negative regulation of translation;GO:0030598::rRNA N-glycosylase activity;GO:0036459::ubiquitinyl hydrolase activity
NC_037645.1	6974112	6974645	6974459;6974447;6974462	388	494	527	288	197	213	4.92085	6.4152	7.49232	4.01999	2.6829	3.70862	2.0757	2.70605	3.1604	1.6957	1.1317	1.56436	0.854729	0.0437037	1	+	+	+	-	-	-	Promoter (1-2kb)	6972337	6976482	4146	1	409992	#NAME?	1775	GO:0003989::acetyl-CoA carboxylase activity;GO:0005524::ATP binding;GO:0006633::fatty acid biosynthetic process;GO:0006886::intracellular protein transport;GO:0008536::Ran GTPase binding
NC_037647.1	8002891	8003309	8003114;8003103;8003138	265	488	455	153	246	142	3.3649	6.33744	6.47064	2.14214	3.34685	2.47819	1.80894	3.40695	3.47856	1.1516	1.79924	1.33225	1.02144	0.101394	1	+	+	+	-	-	-	Promoter (1-2kb)	7940340	8004930	64591	2	410001	#NAME?	1621	GO:0003677::DNA binding;GO:0003917::DNA topoisomerase type I activity;GO:0005515::protein binding;GO:0005694::chromosome;GO:0005886::plasma membrane;GO:0006265::DNA topological change;GO:0016021::integral component of membrane;GO:0019867::outer membrane
NC_037647.1	7977013	7977412	7977157;7977146;7977192	271	371	361	155	238	142	3.4408	4.82112	5.13678	2.16996	3.23845	2.47819	1.93761	2.7149	2.89266	1.22196	1.82366	1.39554	0.764618	0.0504039	1	+	+	+	-	-	-	Promoter (<=1kb)	7940340	7978096	37757	2	410001	#NAME?	684	GO:0003677::DNA binding;GO:0003917::DNA topoisomerase type I activity;GO:0005515::protein binding;GO:0005694::chromosome;GO:0005886::plasma membrane;GO:0006265::DNA topological change;GO:0016021::integral component of membrane;GO:0019867::outer membrane
NC_037638.1	15039358	15039667	15039517;15039538;15039543	800	691	501	587	430	513	10.1326	8.96832	7.12338	8.17908	5.84005	8.90762	7.36251	6.51652	5.17596	5.94305	4.24347	6.47242	0.193872	0.437133	1	+	+	+	-	-	-	Intron (XM_026440870.1/410009, intron 1 of 21)	15000604	15079052	78449	1	410009	#NAME?	38754	GO:0004308::exo-alpha-sialidase activity;GO:0005509::calcium ion binding;GO:0005515::protein binding;GO:0005975::carbohydrate metabolic process;GO:0007156::homophilic cell adhesion via plasma membrane adhesion molecules;GO:0016020::membrane;GO:0033644::host cell membrane;GO:0055036::virion membrane
NC_037646.1	11391507	11391896	11391716;11391721;11391711	472	582	496	148	138	144	5.98345	7.55568	7.05243	2.07259	1.88345	2.51285	3.45584	4.36391	4.07325	1.19706	1.08782	1.45134	1.67046	0.00424961	1	+	+	+	-	-	-	Promoter (1-2kb)	11389966	11393140	3175	2	410012	#NAME?	1244	GO:0032266::phosphatidylinositol-3-phosphate binding;GO:0043130::ubiquitin binding
NC_037644.1	834545	835044	834855;834868;834711	273	491	437	225	254	139	3.4661	6.37632	6.21522	3.14366	3.45525	2.4262	1.56148	2.87254	2.79997	1.41622	1.5566	1.09301	0.831243	0.120267	1	+	+	+	-	-	-	Promoter (<=1kb)	833560	839501	5942	1	410013	#NAME?	985	GO:0005509::calcium ion binding;GO:0005578::proteinaceous extracellular matrix;GO:0007165::signal transduction
NC_037647.1	3204509	3204833	3204619;3204618;3204715	300	366	328	260	297	266	3.80765	4.75632	4.66851	3.63051	4.0379	4.62711	2.639	3.29651	3.23565	2.51623	2.79859	3.20696	0.105951	0.497211	1	+	+	+	-	-	-	Exon (XM_006560110.3/410015, exon 5 of 7)	3201027	3207206	6180	1	410015	#NAME?	3482	GO:0005975::carbohydrate metabolic process;GO:0016837::carbon-oxygen lyase activity, acting on polysaccharides;GO:0030246::carbohydrate binding
NC_037642.1	7080537	7080855	7080697;7080696;7080710	223	298	301	183	137	127	2.8336	3.87504	4.28538	2.55944	1.8699	2.21824	2.00085	2.73623	3.02597	1.80726	1.32037	1.56633	0.725818	0.0604843	1	+	+	+	-	-	-	Promoter (1-2kb)	7077551	7078932	1382	2	410030	#NAME?	-1605	GO:0005515::protein binding
NC_037638.1	11938586	11938894	11938684;11938694;11938710	264	251	214	174	170	150	3.35225	3.26592	3.05085	2.43425	2.31705	2.61683	2.44368	2.38075	2.22397	1.77449	1.68905	1.90758	0.392071	0.0035906	1	+	+	+	-	-	-	Promoter (1-2kb)	11939947	11972016	32070	1	410035	#NAME?	-1053	GO:0004379::glycylpeptide N-tetradecanoyltransferase activity;GO:0005515::protein binding
NC_037641.1	10178573	10178928	10178763;10178729;10178790	238	322	337	149	107	87	3.02335	4.18608	4.79622	2.0865	1.4634	1.52504	1.91296	2.64865	3.0347	1.32019	0.925933	0.964934	1.24225	0.034122	1	+	+	+	-	-	-	Promoter (<=1kb)	10178645	10187901	9257	1	410038	#NAME?	0	GO:0005201::extracellular matrix structural constituent;GO:0005581::collagen trimer;GO:0006784::heme a biosynthetic process;GO:0016021::integral component of membrane;GO:0016627::oxidoreductase activity, acting on the CH-CH group of donors;GO:0019784::NEDD8-specific protease activity;GO:0039693::viral DNA genome replication;GO:0055114::oxidation-reduction process
NC_037652.1	2613273	2614087	2613458;2613909;2613456;2613901;2613442;2613904	650	839	825	378	247	208	8.23515	10.8864	11.7209	5.27189	3.3604	3.62197	2.27604	3.0088	3.23944	1.45705	0.928752	1.00105	1.33163	0.0125229	1	+	+	+	-	-	-	Promoter (<=1kb)	2612739	2646477	33739	1	410040	#NAME?	534	GO:0003676::nucleic acid binding;GO:0003723::RNA binding
NC_037649.1	8500818	8501284	8500941;8501191;8501187;8501194	368	292	278	152	207	148	4.66785	3.79728	3.95901	2.12823	2.8184	2.58217	2.25147	1.83156	1.90957	1.02652	1.35942	1.24547	0.722654	0.00984892	1	+	+	+	-	-	-	Promoter (1-2kb)	8500013	8502775	2763	2	410042	#NAME?	1491	GO:0004616::phosphogluconate dehydrogenase (decarboxylating) activity;GO:0006779::porphyrin-containing compound biosynthetic process;GO:0008152::metabolic process;GO:0008641::small protein activating enzyme activity;GO:0016491::oxidoreductase activity;GO:0016616::oxidoreductase activity, acting on the CH-OH group of donors, NAD or NADP as acceptor;GO:0019354::siroheme biosynthetic process;GO:0043…
NC_037640.1	7016044	7016516	7016155;7016361;7016142;7016370	281	386	434	260	278	185	3.5673	5.01552	6.17265	3.63051	3.78045	3.22338	1.69881	2.38848	2.93952	1.72891	1.80032	1.53503	0.472519	0.205776	1	+	+	+	-	-	-	Intron (XM_016911124.2/410044, intron 5 of 11)	7005875	7099161	93287	1	410044	#NAME?	10169	GO:0003735::structural constituent of ribosome;GO:0005089::Rho guanyl-nucleotide exchange factor activity;GO:0005622::intracellular;GO:0005840::ribosome;GO:0006412::translation;GO:0007165::signal transduction;GO:0035023::regulation of Rho protein signal transduction
NC_037638.1	25251614	25252398	25251794;25252219;25251769;25251827;25252238;25252238	474	618	662	207	164	156	6.00875	8.02224	9.40797	2.89328	2.23575	2.72081	1.72417	2.30193	2.69956	0.830209	0.641535	0.78072	1.57817	0.0301821	1	+	+	+	-	-	-	Promoter (<=1kb)	25251479	25253269	1791	2	410050	#NAME?	871	GO:0005515::protein binding
NC_037643.1	13316848	13317118	13316973;13316988;13316989	210	298	264	120	174	118	2.66915	3.87504	3.76035	1.68311	2.37125	2.06227	2.21855	3.22087	3.12554	1.39897	1.97095	1.71413	0.752471	0.0483529	1	+	+	+	-	-	-	Promoter (<=1kb)	13317660	13320991	3332	1	410054	#NAME?	-542	GO:0005515::protein binding;GO:0008882::[glutamate-ammonia-ligase] adenylyltransferase activity
NC_037638.1	25148395	25148738	25148565;25148560;25148571	340	380	424	174	98	87	4.31365	4.93776	6.03075	2.43425	1.34145	1.52504	2.82457	3.23324	3.94893	1.59394	0.87838	0.998595	1.52758	0.00777059	1	+	+	+	-	-	-	Promoter (2-3kb)	25145480	25152049	6570	1	410057	#NAME?	2915	GO:0005515::protein binding;GO:0005737::cytoplasm;GO:0006744::ubiquinone biosynthetic process;GO:0008813::chorismate lyase activity;GO:0043565::sequence-specific DNA binding
NC_037640.1	3238311	3238615	3238455;3238462;3238495	262	298	303	142	142	109	3.32695	3.87504	4.31376	1.98913	1.93765	1.9063	2.45704	2.86182	3.18583	1.46903	1.43101	1.40785	0.981279	0.0213279	1	+	+	+	-	-	-	Promoter (1-2kb)	3237388	3240227	2840	2	410076	#NAME?	1612	GO:0004127::cytidylate kinase activity;GO:0004140::dephospho-CoA kinase activity;GO:0005524::ATP binding;GO:0006139::nucleobase-containing compound metabolic process;GO:0006810::transport;GO:0008152::metabolic process;GO:0015937::coenzyme A biosynthetic process;GO:0016301::kinase activity;GO:0016887::ATPase activity;GO:0043531::ADP binding;GO:0043934::sporulation
NC_037638.1	24180850	24181420	24180952;24181285;24181293;24181291	302	355	466	188	164	160	3.83295	4.61376	6.62673	2.62899	2.23575	2.79013	1.51204	1.82006	2.61414	1.0371	0.88197	1.10066	0.977559	0.0918385	1	+	+	+	-	-	-	Promoter (1-2kb)	24178361	24183155	4795	2	410080	#NAME?	1735	GO:0006400::tRNA modification;GO:0008176::tRNA (guanine-N7-)-methyltransferase activity
NC_037645.1	12314020	12314501	12314320;12314331;12314350	410	485	556	214	218	198	5.19915	6.29856	7.90383	2.99065	2.96745	3.44867	2.4297	2.94348	3.69366	1.39761	1.38677	1.61165	1.0444	0.0465685	1	+	+	+	-	-	-	Promoter (<=1kb)	12314105	12321727	7623	1	410101	#NAME?	0	GO:0005576::extracellular region;GO:0006914::autophagy;GO:0008200::ion channel inhibitor activity;GO:0009405::pathogenesis;GO:0015078::hydrogen ion transmembrane transporter activity;GO:0015991::ATP hydrolysis coupled proton transport;GO:0033179::proton-transporting V-type ATPase, V0 domain;GO:0042626::ATPase activity, coupled to transmembrane movement of substances
NC_037645.1	12315279	12315570	12315428;12315414;12315437	252	222	275	153	154	160	3.20045	2.89008	3.91644	2.14214	2.10025	2.79013	2.46885	2.22943	3.02117	1.65246	1.62015	2.15233	0.508892	0.0635696	1	+	+	+	-	-	-	Promoter (1-2kb)	12314105	12321727	7623	1	410101	#NAME?	1174	GO:0005576::extracellular region;GO:0006914::autophagy;GO:0008200::ion channel inhibitor activity;GO:0009405::pathogenesis;GO:0015078::hydrogen ion transmembrane transporter activity;GO:0015991::ATP hydrolysis coupled proton transport;GO:0033179::proton-transporting V-type ATPase, V0 domain;GO:0042626::ATPase activity, coupled to transmembrane movement of substances
NC_037639.1	6297408	6297749	6297586;6297585;6297600	298	402	432	140	118	120	3.78235	5.22288	6.14427	1.96131	1.61245	2.09693	2.49116	3.43994	4.04679	1.29177	1.06201	1.3811	1.41767	0.0392664	1	+	+	+	-	-	-	5' UTR	6302258	6329045	26788	1	410127	#NAME?	-4509	GO:0005089::Rho guanyl-nucleotide exchange factor activity;GO:0005515::protein binding;GO:0005737::cytoplasm;GO:0016972::thiol oxidase activity;GO:0035023::regulation of Rho protein signal transduction;GO:0035556::intracellular signal transduction;GO:0047134::protein-disulfide reductase activity;GO:0055114::oxidation-reduction process
NC_037639.1	6304933	6305281	6305109;6305139;6305112	286	328	394	188	130	104	3.63055	4.26384	5.60505	2.62899	1.77505	1.81965	2.34322	2.75196	3.6176	1.6968	1.14565	1.17443	1.11706	0.0355799	1	+	+	+	-	-	-	Promoter (2-3kb)	6302258	6329045	26788	1	410127	#NAME?	2675	GO:0005089::Rho guanyl-nucleotide exchange factor activity;GO:0005515::protein binding;GO:0005737::cytoplasm;GO:0016972::thiol oxidase activity;GO:0035023::regulation of Rho protein signal transduction;GO:0035556::intracellular signal transduction;GO:0047134::protein-disulfide reductase activity;GO:0055114::oxidation-reduction process
NC_037639.1	15941487	15941991	15941617;15941926;15941613;15941879;15941617	322	412	336	229	182	155	4.08595	5.35248	4.78203	3.1993	2.47965	2.70348	1.8225	2.38743	2.13298	1.42702	1.10603	1.20586	0.762528	0.0166715	1	+	+	+	-	-	-	Promoter (2-3kb)	15939363	15942249	2887	1	410132	#NAME?	2124	GO:0008152::metabolic process;GO:0016255::attachment of GPI anchor to protein;GO:0016757::transferase activity, transferring glycosyl groups;GO:0042765::GPI-anchor transamidase complex
NC_037639.1	15940694	15940936	15940788;15940895;15940828	237	214	210	173	103	101	3.0107	2.7864	2.99409	2.42034	1.4092	1.76766	2.79079	2.58288	2.7754	2.24355	1.30627	1.63855	0.651353	0.0620339	1	+	+	+	-	-	-	Promoter (1-2kb)	15939363	15942249	2887	1	410132	#NAME?	1331	GO:0008152::metabolic process;GO:0016255::attachment of GPI anchor to protein;GO:0016757::transferase activity, transferring glycosyl groups;GO:0042765::GPI-anchor transamidase complex
NC_037639.1	15936198	15936535	15936399;15936404;15936405	1133	1134	886	779	765	570	14.3451	14.7096	12.5865	10.8498	10.3793	9.89543	9.5599	9.80281	8.38793	7.23055	6.917	6.59454	0.41996	0.0206526	1	+	+	+	-	-	-	Promoter (1-2kb)	15910817	15934840	24024	2	410133	#NAME?	-1358	GO:0005515::protein binding
NC_037640.1	360164	360762	360336;360590;360571;360500	882	606	288	177	202	91	11.17	7.86672	4.10091	2.47598	2.75065	1.59436	4.20042	2.95824	1.54213	0.93108	1.03437	0.599551	1.76219	0.112876	1	+	+	+	-	-	-	Exon (XM_026439770.1/410161, exon 19 of 30)	350443	391207	40765	1	410161	#NAME?	9721	GO:0005515::protein binding;GO:0006313::transposition, DNA-mediated;GO:0007165::signal transduction;GO:0007275::multicellular organismal development;GO:0009966::regulation of signal transduction;GO:0016020::membrane
NC_037642.1	8441439	8441719	8441539;8441580;8441552	208	246	195	183	130	145	2.64385	3.20112	2.78124	2.55944	1.77505	2.53018	2.11932	2.56603	2.22945	2.05166	1.42289	2.0282	0.329536	0.139427	1	+	+	+	-	-	-	Intron (XM_006564768.2/410165, intron 5 of 5)	8442736	8450226	7491	2	410165	#NAME?	8507	GO:0003723::RNA binding;GO:0009523::photosystem II;GO:0009539::photosystem II reaction center;GO:0015979::photosynthesis;GO:0016020::membrane
NC_037642.1	8441827	8442183	8441987;8441999;8442005	310	384	380	103	102	116	3.93415	4.9896	5.40639	1.44664	1.39565	2.02761	2.48227	3.14821	3.41119	0.912765	0.880592	1.27933	1.55709	0.00880871	1	+	+	+	-	-	-	Intron (XM_006564768.2/410165, intron 5 of 5)	8442736	8450226	7491	2	410165	#NAME?	8043	GO:0003723::RNA binding;GO:0009523::photosystem II;GO:0009539::photosystem II reaction center;GO:0015979::photosynthesis;GO:0016020::membrane
NC_037649.1	8151985	8152536	8152140;8152316;8152335;8152320	438	417	437	303	267	205	5.55335	5.41728	6.21522	4.22864	3.6314	3.56998	2.26612	2.21059	2.5362	1.72555	1.48184	1.45678	0.588393	0.00439567	1	+	+	+	-	-	-	Intron (XM_026444390.1/410166, intron 1 of 17)	8145410	8193635	48226	1	410166	#NAME?	6575	GO:0003677::DNA binding;GO:0006820::anion transport;GO:0016021::integral component of membrane
NC_037649.1	8181723	8182087	8181898;8181914;8181912	619	343	228	167	134	107	7.843	4.45824	3.24951	2.33688	1.82925	1.87164	4.84012	2.75129	2.00536	1.44215	1.12888	1.15504	1.3649	0.145655	1	+	+	+	-	-	-	Intron (XM_026444390.1/410166, intron 1 of 17)	8176200	8192407	16208	1	410166	#NAME?	5523	GO:0003677::DNA binding;GO:0006820::anion transport;GO:0016021::integral component of membrane
NC_037649.1	8154311	8154712	8154455;8154475;8154474	366	434	343	218	196	103	4.64255	5.6376	4.88136	3.04629	2.66935	1.80232	2.60134	3.15889	2.73515	1.70691	1.49571	1.00989	1.012	0.00652765	1	+	+	+	-	-	-	Intron (XM_026444390.1/410166, intron 1 of 17)	8145410	8193635	48226	1	410166	#NAME?	8901	GO:0003677::DNA binding;GO:0006820::anion transport;GO:0016021::integral component of membrane
NC_037651.1	1497818	1498075	1497927;1497925;1497947	215	276	316	140	101	98	2.7324	3.58992	4.49823	1.96131	1.3821	1.71567	2.38556	3.13424	3.92725	1.71235	1.20666	1.49789	1.09683	0.0521984	1	+	+	+	-	-	-	3' UTR	1491671	1498151	6481	1	410174	#NAME?	6147	GO:0003735::structural constituent of ribosome;GO:0005622::intracellular;GO:0005743::mitochondrial inner membrane;GO:0005750::mitochondrial respiratory chain complex III;GO:0005840::ribosome;GO:0006122::mitochondrial electron transport, ubiquinol to cytochrome c;GO:0006412::translation;GO:0017025::TBP-class protein binding
NC_037651.1	1495026	1495413	1495202;1495200;1495228	264	354	384	206	194	140	3.35225	4.6008	5.46315	2.87937	2.64225	2.44353	1.94613	2.67096	3.1716	1.6716	1.53394	1.41858	0.752203	0.0918081	1	+	+	+	-	-	-	Exon (XM_393658.7/410174, exon 7 of 7)	1491671	1498151	6481	1	410174	#NAME?	3355	GO:0003735::structural constituent of ribosome;GO:0005622::intracellular;GO:0005743::mitochondrial inner membrane;GO:0005750::mitochondrial respiratory chain complex III;GO:0005840::ribosome;GO:0006122::mitochondrial electron transport, ubiquinol to cytochrome c;GO:0006412::translation;GO:0017025::TBP-class protein binding
NC_037647.1	11689696	11690089	11689868;11689871;11689864	970	616	459	205	173	199	12.2831	7.99632	6.5274	2.86546	2.3577	3.466	7.02228	4.57152	3.73173	1.63819	1.3479	1.98152	1.62531	0.0683636	1	+	+	+	-	-	-	Downstream (1-2kb)	11691133	11702092	10960	2	410178	#NAME?	12003	GO:0005515::protein binding;GO:0006260::DNA replication
NC_037647.1	9362833	9363156	9363026;9362976;9363007	221	375	288	149	135	96	2.8083	4.87296	4.10091	2.0865	1.8428	1.68101	1.95238	3.38777	2.85103	1.45057	1.28115	1.16867	1.07045	0.0710173	1	+	+	+	-	-	-	Distal Intergenic	9348067	9350007	1941	2	410209	NM_001252426.1	-12826	GO:0003743::translation initiation factor activity;GO:0005737::cytoplasm;GO:0005852::eukaryotic translation initiation factor 3 complex;GO:0008855::exodeoxyribonuclease VII activity;GO:0019012::virion;GO:0046872::metal ion binding
NC_037647.1	9348080	9349578	9348292;9348881;9349457;9348848;9348645	661	1113	1129	379	396	404	8.3743	14.4374	16.0347	5.2858	5.37935	7.01865	1.25838	2.16947	2.40949	0.794284	0.808341	1.05467	1.13535	0.0868232	1	+	+	+	-	-	-	Promoter (<=1kb)	9348067	9350007	1941	2	410209	NM_001252426.1	429	GO:0003743::translation initiation factor activity;GO:0005737::cytoplasm;GO:0005852::eukaryotic translation initiation factor 3 complex;GO:0008855::exodeoxyribonuclease VII activity;GO:0019012::virion;GO:0046872::metal ion binding
NC_037647.1	9239051	9239393	9239208;9239250;9239242	651	752	730	502	493	378	8.2478	9.75888	10.3729	6.99673	6.6937	6.56807	5.4164	6.40874	6.81197	4.59481	4.39581	4.3133	0.486326	0.0455262	1	+	+	+	-	-	-	Exon (XR_410422.3/408294, exon 9 of 9)	9230605	9237044	6440	1	410211	#NAME?	8446	GO:0005739::mitochondrion;GO:0008270::zinc ion binding;GO:0008948::oxaloacetate decarboxylase activity;GO:0015081::sodium ion transmembrane transporter activity;GO:0016020::membrane;GO:0016021::integral component of membrane;GO:0019087::transformation of host cell by virus;GO:0071436::sodium ion export
NC_037647.1	6738766	6739501	6738913;6739128;6739343;6738962;6738955	408	687	757	327	477	291	5.17385	8.91648	10.756	4.56248	6.4769	5.06036	1.58344	2.72887	3.29185	1.39634	1.98224	1.54871	0.625995	0.211026	1	+	+	+	-	-	-	Exon (XM_393712.6/410229, exon 1 of 3)	6734939	6777916	42978	1	410229	#NAME?	3827	GO:0005515::protein binding;GO:0007165::signal transduction
NC_037647.1	7007751	7008391	7007835;7008062;7007858;7008069;7007847;7008123	351	495	443	315	323	198	4.4528	6.42816	6.30036	4.39556	4.3902	3.44867	1.56474	2.25889	2.21398	1.54462	1.54274	1.21188	0.489894	0.105793	1	+	+	+	-	-	-	Promoter (<=1kb)	6966442	7008171	41730	2	410233	#NAME?	0	GO:0003697::single-stranded DNA binding;GO:0003824::catalytic activity;GO:0008152::metabolic process;GO:0008484::sulfuric ester hydrolase activity
NC_037647.1	6168196	6168928	6168464;6168318;6168562;6168622	357	471	485	266	283	144	4.5287	6.11712	6.89634	3.71397	3.8482	2.51285	1.39167	1.87979	2.11925	1.1413	1.18255	0.772199	0.800044	0.048798	1	+	+	+	-	-	-	Distal Intergenic	6223652	6228440	4789	2	410235	#NAME?	59512	GO:0004673::protein histidine kinase activity;GO:0005515::protein binding;GO:0007165::signal transduction
NC_037647.1	6281790	6282249	6281946;6282050;6281933	371	597	501	235	261	200	4.7058	7.75008	7.12338	3.28276	3.5501	3.48333	2.30432	3.79503	3.48815	1.60749	1.7384	1.7057	0.924416	0.0786249	1	+	+	+	-	-	-	5' UTR	6265679	6286951	21273	2	410236	#NAME?	4702	GO:0008270::zinc ion binding
NC_037647.1	6292829	6293416	6293056;6293023;6293342;6293027	298	436	490	167	211	165	3.78235	5.66352	6.96729	2.33688	2.8726	2.87678	1.44894	2.16958	2.66903	0.895211	1.10043	1.10204	1.02131	0.0902936	1	+	+	+	-	-	-	Exon (XM_026443427.1/410237, exon 3 of 13)	6289777	6310617	20841	1	410237	#NAME?	3052	GO:0008270::zinc ion binding;GO:0020037::heme binding
NC_037648.1	14157239	14157555	14157408;14157403;14157399	276	403	381	144	179	118	3.50405	5.23584	5.42058	2.01695	2.439	2.06227	2.48987	3.72043	3.8517	1.43319	1.73308	1.46539	1.11932	0.0472257	1	+	+	+	-	-	-	Promoter (2-3kb)	14089274	14160068	70795	2	410259	#NAME?	2513	GO:0003700::sequence-specific DNA binding transcription factor activity;GO:0003743::translation initiation factor activity;GO:0004190::aspartic-type endopeptidase activity;GO:0005198::structural molecule activity;GO:0005622::intracellular;GO:0005634::nucleus;GO:0005737::cytoplasm;GO:0005852::eukaryotic translation initiation factor 3 complex;GO:0006260::DNA replication;GO:0006355::regulation of t…
NC_037648.1	14143863	14144169	14144021;14143995;14144016	212	354	386	190	198	135	2.69445	4.6008	5.49153	2.65681	2.69645	2.35688	1.97696	3.37568	4.02922	1.94934	1.97843	1.72928	0.729824	0.174766	1	+	+	+	-	-	-	Intron (XM_006566532.3/410259, intron 3 of 12)	14089274	14160068	70795	2	410259	#NAME?	15899	GO:0003700::sequence-specific DNA binding transcription factor activity;GO:0003743::translation initiation factor activity;GO:0004190::aspartic-type endopeptidase activity;GO:0005198::structural molecule activity;GO:0005622::intracellular;GO:0005634::nucleus;GO:0005737::cytoplasm;GO:0005852::eukaryotic translation initiation factor 3 complex;GO:0006260::DNA replication;GO:0006355::regulation of t…
NC_037648.1	14265000	14265249	14265114;14265124;14265108	487	558	493	445	417	255	6.1732	7.24464	7.00986	6.20386	5.6639	4.43648	5.56208	6.52745	6.31591	5.5897	5.10319	3.99728	0.32528	0.10255	1	+	+	+	-	-	-	Promoter (<=1kb)	14256703	14265021	8319	2	410261	#NAME?	0	GO:0003700::sequence-specific DNA binding transcription factor activity;GO:0005515::protein binding;GO:0005634::nucleus;GO:0006355::regulation of transcription, DNA-templated;GO:0008270::zinc ion binding;GO:0016032::viral process;GO:0035556::intracellular signal transduction
NC_037648.1	15697881	15698470	15698237;15698252;15698313	722	529	494	631	433	308	9.14595	6.8688	7.02405	8.79112	5.8807	5.35497	3.49175	2.62238	2.68165	3.35628	2.24514	2.04443	0.202134	0.487145	1	+	+	+	-	-	-	Exon (XM_393750.7/410269, exon 11 of 15)	15692949	15701225	8277	1	410269	#NAME?	4932	GO:0002949::tRNA threonylcarbamoyladenosine modification;GO:0003924::GTPase activity;GO:0005515::protein binding;GO:0005524::ATP binding;GO:0005525::GTP binding;GO:0006810::transport;GO:0006955::immune response;GO:0016021::integral component of membrane;GO:0016301::kinase activity;GO:0016887::ATPase activity;GO:0042626::ATPase activity, coupled to transmembrane movement of substances;GO:0043531::…
NC_037648.1	15716268	15716582	15716427;15716425;15716430	1049	709	544	519	431	207	13.2825	9.2016	7.73355	7.2332	5.8536	3.60464	9.49808	6.5799	5.53012	5.17233	4.1858	2.57761	0.856283	0.0956334	1	+	+	+	-	-	-	Intron (XM_003251514.4/100578939, intron 2 of 6)	15692949	15701225	8277	1	410269	#NAME?	23319	GO:0002949::tRNA threonylcarbamoyladenosine modification;GO:0003924::GTPase activity;GO:0005515::protein binding;GO:0005524::ATP binding;GO:0005525::GTP binding;GO:0006810::transport;GO:0006955::immune response;GO:0016021::integral component of membrane;GO:0016301::kinase activity;GO:0016887::ATPase activity;GO:0042626::ATPase activity, coupled to transmembrane movement of substances;GO:0043531::…
NC_037648.1	16129638	16130040	16129819;16129855;16129805	1429	1560	1452	1147	1203	1244	18.0895	20.2306	20.6181	15.9687	16.3142	21.5759	10.1109	11.3076	11.5242	8.92547	9.11858	12.0595	0.130021	0.460495	1	+	+	+	-	-	-	3' UTR	16129148	16137231	8084	2	410271	#NAME?	7191	GO:0005515::protein binding
NC_037648.1	16096508	16097029	16096721;16096731;16096739	280	304	353	244	210	158	3.55465	3.9528	5.02326	3.40795	2.85905	2.75547	1.53389	1.70569	2.16761	1.47058	1.23372	1.18903	0.473874	0.0996884	1	+	+	+	-	-	-	Promoter (1-2kb)	16095127	16098723	3597	1	410273	#NAME?	1381	GO:0003677::DNA binding;GO:0005524::ATP binding;GO:0016787::hydrolase activity
NC_037648.1	16156843	16157322	16157130;16157143;16157144	2259	2549	2189	1539	1543	1272	28.589	33.048	31.0761	21.4214	20.9212	22.0611	13.416	15.5085	14.5832	10.0525	9.81775	10.3527	0.52563	0.013788	1	+	+	+	-	-	-	Promoter (2-3kb)	16154821	16159375	4555	1	410278	#NAME?	2022	GO:0003677::DNA binding;GO:0006355::regulation of transcription, DNA-templated;GO:0016021::integral component of membrane;GO:0016192::vesicle-mediated transport;GO:0022857::transmembrane transporter activity;GO:0055085::transmembrane transport
NC_037648.1	16150458	16150850	16150578;16150564;16150648	3249	2771	2169	1537	1286	1488	41.1125	35.9251	30.7923	21.3936	17.4388	25.8044	23.5639	20.5907	17.6488	12.2619	9.99518	14.79	0.73833	0.021436	1	+	+	+	-	-	-	Promoter (<=1kb)	16150026	16159375	9350	1	410278	#NAME?	432	GO:0003677::DNA binding;GO:0006355::regulation of transcription, DNA-templated;GO:0016021::integral component of membrane;GO:0016192::vesicle-mediated transport;GO:0022857::transmembrane transporter activity;GO:0055085::transmembrane transport
NC_037648.1	16188447	16188725	16188569;16188570;16188586	948	854	681	888	847	476	12.0048	11.0808	9.67758	12.366	11.4904	8.26641	9.69209	8.94609	7.8132	9.9837	9.27678	6.67389	0.0284773	0.889672	1	+	+	+	-	-	-	Exon (XR_411798.3/410279, exon 8 of 10)	16176811	16195262	18452	2	410279	#NAME?	6537	GO:0000775::chromosome, centromeric region;GO:0001104::RNA polymerase II transcription cofactor activity;GO:0003677::DNA binding;GO:0003682::chromatin binding;GO:0003700::sequence-specific DNA binding transcription factor activity;GO:0003911::DNA ligase (NAD+) activity;GO:0004518::nuclease activity;GO:0004674::protein serine/threonine kinase activity;GO:0005096::GTPase activator activity;GO:00055…
NC_037648.1	16213728	16215152	16213808;16214213;16214158;16214336;16214957;16214789;16214956	2559	3135	3024	2398	1898	1657	32.384	40.6426	42.9247	33.3701	25.7314	28.7331	5.11896	6.42441	6.78514	5.27484	4.06738	4.54186	0.400658	0.0818345	1	+	+	+	-	-	-	Promoter (<=1kb)	16209574	16215685	6112	2	410282	#NAME?	533	GO:0005515::protein binding;GO:0016020::membrane;GO:0071203::WASH complex
NC_037648.1	374915	375556	375009;375289;375299;375309	313	431	468	228	247	173	3.9721	5.59872	6.65511	3.18539	3.3604	3.01542	1.39364	1.96436	2.335	1.11762	1.17902	1.05798	0.763036	0.102111	1	+	+	+	-	-	-	Exon (XM_393772.6/410291, exon 3 of 8)	379830	383137	3308	2	410290	#NAME?	7581	.
NC_037648.1	332481	332743	332598;332598;332636	197	216	198	148	129	124	2.5047	2.81232	2.82381	2.07259	1.7615	2.16625	2.14519	2.40866	2.4185	1.77511	1.50867	1.85532	0.440132	0.0120165	1	+	+	+	-	-	-	Intron (XM_393772.6/410291, intron 1 of 7)	314918	377714	62797	1	410291	#NAME?	17563	GO:0006508::proteolysis;GO:0006629::lipid metabolic process;GO:0016805::dipeptidase activity
NC_037648.1	7528091	7528358	7528213;7528206;7528228	222	272	223	152	175	132	2.82095	3.53808	3.17856	2.12823	2.3848	2.30489	2.37098	2.97372	2.67154	1.78875	2.0044	1.93723	0.484293	0.0359602	1	+	+	+	-	-	-	Intron (XM_026443965.1/410304, intron 1 of 5)	7355643	7571367	215725	2	410304	#NAME?	43009	GO:0003677::DNA binding;GO:0005634::nucleus;GO:0006355::regulation of transcription, DNA-templated;GO:0009289::pilus;GO:0015886::heme transport;GO:0016021::integral component of membrane;GO:0017004::cytochrome complex assembly;GO:0046872::metal ion binding
NC_037648.1	7545569	7545849	7545700;7545707;7545698	306	277	306	144	137	89	3.88355	3.60288	4.35633	2.01695	1.8699	1.5597	3.11307	2.88809	3.49205	1.6168	1.49892	1.25026	1.12059	0.00252401	1	+	+	+	-	-	-	Intron (XM_026443965.1/410304, intron 1 of 5)	7355643	7571367	215725	2	410304	#NAME?	25518	GO:0003677::DNA binding;GO:0005634::nucleus;GO:0006355::regulation of transcription, DNA-templated;GO:0009289::pilus;GO:0015886::heme transport;GO:0016021::integral component of membrane;GO:0017004::cytochrome complex assembly;GO:0046872::metal ion binding
NC_037648.1	7472060	7472337	7472191;7472172;7472209	251	224	169	131	176	85	3.1878	2.916	2.4123	1.83612	2.39835	1.49038	2.58293	2.3627	1.95458	1.48773	1.94328	1.20759	0.572955	0.0572614	1	+	+	+	-	-	-	Intron (XM_026443965.1/410304, intron 5 of 5)	7355643	7571367	215725	2	410304	#NAME?	99030	GO:0003677::DNA binding;GO:0005634::nucleus;GO:0006355::regulation of transcription, DNA-templated;GO:0009289::pilus;GO:0015886::heme transport;GO:0016021::integral component of membrane;GO:0017004::cytochrome complex assembly;GO:0046872::metal ion binding
NC_037648.1	7708237	7708617	7708459;7708422;7708463	243	385	349	138	190	140	3.0866	5.00256	4.9665	1.93349	2.58805	2.44353	1.82483	2.95756	2.93624	1.1431	1.53008	1.44464	0.906466	0.0737028	1	+	+	+	-	-	-	Intron (XM_026443960.1/410304, intron 1 of 9)	7355643	7703606	347964	2	410304	#NAME?	-4631	GO:0003677::DNA binding;GO:0005634::nucleus;GO:0006355::regulation of transcription, DNA-templated;GO:0009289::pilus;GO:0015886::heme transport;GO:0016021::integral component of membrane;GO:0017004::cytochrome complex assembly;GO:0046872::metal ion binding
NC_037648.1	7532714	7533169	7532909;7532941;7532954	277	464	395	213	210	142	3.5167	6.0264	5.61924	2.97674	2.85905	2.47819	1.73715	2.97687	2.77574	1.47042	1.41229	1.22415	0.866881	0.0940885	1	+	+	+	-	-	-	Intron (XM_026443965.1/410304, intron 1 of 5)	7355643	7571367	215725	2	410304	#NAME?	38198	GO:0003677::DNA binding;GO:0005634::nucleus;GO:0006355::regulation of transcription, DNA-templated;GO:0009289::pilus;GO:0015886::heme transport;GO:0016021::integral component of membrane;GO:0017004::cytochrome complex assembly;GO:0046872::metal ion binding
NC_037648.1	7866300	7866763	7866468;7866589;7866557	269	381	301	128	238	147	3.4155	4.95072	4.28538	1.79439	3.23845	2.56484	1.65807	2.40335	2.08036	0.871095	1.57212	1.24511	0.735689	0.0508914	1	+	+	+	-	-	-	Distal Intergenic	7355643	7784657	429015	2	410304	#NAME?	-81643	GO:0003677::DNA binding;GO:0005634::nucleus;GO:0006355::regulation of transcription, DNA-templated;GO:0009289::pilus;GO:0015886::heme transport;GO:0016021::integral component of membrane;GO:0017004::cytochrome complex assembly;GO:0046872::metal ion binding
NC_037648.1	7602487	7602751	7602618;7602623;7602632	195	228	184	106	144	111	2.4794	2.96784	2.62515	1.48837	1.96475	1.94096	2.1075	2.52267	2.23139	1.26512	1.67004	1.64982	0.581619	0.0137235	1	+	+	+	-	-	-	Intron (XM_026443962.1/410304, intron 4 of 9)	7355643	7572592	216950	2	410304	#NAME?	-29895	GO:0003677::DNA binding;GO:0005634::nucleus;GO:0006355::regulation of transcription, DNA-templated;GO:0009289::pilus;GO:0015886::heme transport;GO:0016021::integral component of membrane;GO:0017004::cytochrome complex assembly;GO:0046872::metal ion binding
NC_037648.1	10309983	10310523	10310077;10310398;10310063;10310395;10310402	426	432	413	196	280	164	5.40155	5.61168	5.87466	2.74027	3.80755	2.85945	2.24899	2.33648	2.44597	1.14094	1.58531	1.19056	0.844141	0.00949548	1	+	+	+	-	-	-	Intron (XM_006564320.3/410309, intron 1 of 4)	10215242	10294674	79433	2	410309	NM_001080110.1	-15309	GO:0003677::DNA binding;GO:0003700::sequence-specific DNA binding transcription factor activity;GO:0003743::translation initiation factor activity;GO:0005215::transporter activity;GO:0005219::ryanodine-sensitive calcium-release channel activity;GO:0005634::nucleus;GO:0005737::cytoplasm;GO:0005789::endoplasmic reticulum membrane;GO:0005840::ribosome;GO:0005852::eukaryotic translation initiation fa…
NC_037648.1	10356315	10357021	10356542;10356531;10356490	947	1296	1340	628	486	400	11.9922	16.8091	19.0288	8.74939	6.59885	6.94933	3.82073	5.3554	6.06259	2.78756	2.1024	2.21406	1.10103	0.0439937	1	+	+	+	-	-	-	Intron (XM_006564320.3/410309, intron 1 of 4)	10210607	10372038	161432	2	410309	#NAME?	15017	GO:0003677::DNA binding;GO:0003700::sequence-specific DNA binding transcription factor activity;GO:0003743::translation initiation factor activity;GO:0005215::transporter activity;GO:0005219::ryanodine-sensitive calcium-release channel activity;GO:0005634::nucleus;GO:0005737::cytoplasm;GO:0005789::endoplasmic reticulum membrane;GO:0005840::ribosome;GO:0005852::eukaryotic translation initiation fa…
NC_037648.1	10370597	10370830	10370724;10370729;10370734	1145	900	702	853	801	409	14.4969	11.677	9.97557	11.8791	10.8671	7.1053	13.9549	11.2404	9.60259	11.4349	10.4608	6.83964	0.276171	0.3453	1	+	+	+	-	-	-	Promoter (1-2kb)	10210607	10372038	161432	2	410309	#NAME?	1208	GO:0003677::DNA binding;GO:0003700::sequence-specific DNA binding transcription factor activity;GO:0003743::translation initiation factor activity;GO:0005215::transporter activity;GO:0005219::ryanodine-sensitive calcium-release channel activity;GO:0005634::nucleus;GO:0005737::cytoplasm;GO:0005789::endoplasmic reticulum membrane;GO:0005840::ribosome;GO:0005852::eukaryotic translation initiation fa…
NC_037648.1	10342326	10342684	10342477;10342483;10342504	240	376	444	149	172	121	3.04865	4.88592	6.31455	2.0865	2.34415	2.11426	1.91284	3.06562	3.962	1.30915	1.47081	1.32657	1.12243	0.111909	1	+	+	+	-	-	-	Intron (XM_006564320.3/410309, intron 1 of 4)	10210607	10372038	161432	2	410309	#NAME?	29354	GO:0003677::DNA binding;GO:0003700::sequence-specific DNA binding transcription factor activity;GO:0003743::translation initiation factor activity;GO:0005215::transporter activity;GO:0005219::ryanodine-sensitive calcium-release channel activity;GO:0005634::nucleus;GO:0005737::cytoplasm;GO:0005789::endoplasmic reticulum membrane;GO:0005840::ribosome;GO:0005852::eukaryotic translation initiation fa…
NC_037648.1	10246586	10247006	10246804;10246817;10246789	387	629	566	294	298	203	4.9082	8.1648	8.04573	4.10345	4.05145	3.53532	2.62607	4.36848	4.30477	2.1955	2.16768	1.89153	0.853221	0.0944439	1	+	+	+	-	-	-	Intron (XM_006564318.3/410309, intron 1 of 4)	10210607	10231041	20435	2	410309	#NAME?	-15545	GO:0003677::DNA binding;GO:0003700::sequence-specific DNA binding transcription factor activity;GO:0003743::translation initiation factor activity;GO:0005215::transporter activity;GO:0005219::ryanodine-sensitive calcium-release channel activity;GO:0005634::nucleus;GO:0005737::cytoplasm;GO:0005789::endoplasmic reticulum membrane;GO:0005840::ribosome;GO:0005852::eukaryotic translation initiation fa…
NC_037648.1	10315488	10315851	10315654;10315683;10315685	309	303	350	225	160	121	3.9215	3.93984	4.98069	3.14366	2.18155	2.11426	2.42671	2.43806	3.08216	1.94536	1.34999	1.30835	0.787602	0.0203902	1	+	+	+	-	-	-	Intron (XM_006564320.3/410309, intron 1 of 4)	10215242	10294674	79433	2	410309	NM_001080110.1	-20814	GO:0003677::DNA binding;GO:0003700::sequence-specific DNA binding transcription factor activity;GO:0003743::translation initiation factor activity;GO:0005215::transporter activity;GO:0005219::ryanodine-sensitive calcium-release channel activity;GO:0005634::nucleus;GO:0005737::cytoplasm;GO:0005789::endoplasmic reticulum membrane;GO:0005840::ribosome;GO:0005852::eukaryotic translation initiation fa…
NC_037648.1	10343432	10343698	10343538;10343556;10343552	237	294	248	163	142	112	3.0107	3.8232	3.53331	2.28124	1.93765	1.95829	2.53994	3.22539	2.98083	1.92454	1.63467	1.65208	0.747007	0.0149377	1	+	+	+	-	-	-	Intron (XM_006564320.3/410309, intron 1 of 4)	10210607	10372038	161432	2	410309	#NAME?	28340	GO:0003677::DNA binding;GO:0003700::sequence-specific DNA binding transcription factor activity;GO:0003743::translation initiation factor activity;GO:0005215::transporter activity;GO:0005219::ryanodine-sensitive calcium-release channel activity;GO:0005634::nucleus;GO:0005737::cytoplasm;GO:0005789::endoplasmic reticulum membrane;GO:0005840::ribosome;GO:0005852::eukaryotic translation initiation fa…
NC_037648.1	10385487	10385907	10385632;10385643;10385641	455	492	594	361	301	163	5.7684	6.38928	8.44305	5.03542	4.0921	2.84212	3.08631	3.41851	4.51735	2.69414	2.18943	1.52064	0.783316	0.0519886	1	+	+	+	-	-	-	Distal Intergenic	10210607	10372038	161432	2	410309	#NAME?	-13449	GO:0003677::DNA binding;GO:0003700::sequence-specific DNA binding transcription factor activity;GO:0003743::translation initiation factor activity;GO:0005215::transporter activity;GO:0005219::ryanodine-sensitive calcium-release channel activity;GO:0005634::nucleus;GO:0005737::cytoplasm;GO:0005789::endoplasmic reticulum membrane;GO:0005840::ribosome;GO:0005852::eukaryotic translation initiation fa…
NC_037648.1	11594562	11594892	11594656;11594674;11594681	221	249	223	145	181	82	2.8083	3.24	3.17856	2.03086	2.4661	1.43839	1.91109	2.20487	2.16306	1.38203	1.67822	0.978848	0.636507	0.0489173	1	+	+	+	-	-	-	Intron (XM_006566310.3/410317, intron 3 of 11)	11458086	11613900	155815	2	410317	#NAME?	19008	GO:0003677::DNA binding;GO:0003700::sequence-specific DNA binding transcription factor activity;GO:0003899::DNA-directed RNA polymerase activity;GO:0004222::metalloendopeptidase activity;GO:0005216::ion channel activity;GO:0005516::calmodulin binding;GO:0005975::carbohydrate metabolic process;GO:0006351::transcription, DNA-templated;GO:0006355::regulation of transcription, DNA-templated;GO:000645…
NC_037648.1	11931614	11932248	11931887;11931912;11931919	1662	1071	1171	778	892	604	21.037	13.8931	16.6307	10.8359	12.1001	10.4847	7.46237	4.92824	5.89934	3.84377	4.29222	3.71919	0.625533	0.0937639	1	+	+	+	-	-	-	Intron (XM_001120691.5/726407, intron 6 of 8)	11914702	11921334	6633	1	410319	#NAME?	16912	.
NC_037648.1	12055691	12056020	12055825;12055832;12055847	359	489	544	265	262	163	4.554	6.3504	7.73355	3.70006	3.56365	2.84212	3.10846	4.33465	5.27875	2.52558	2.43247	1.93997	0.883055	0.0807863	1	+	+	+	-	-	-	Exon (XM_026443624.1/410322, exon 4 of 7)	11956327	12051973	95647	2	410320	#NAME?	-3718	GO:0001104::RNA polymerase II transcription cofactor activity;GO:0003743::translation initiation factor activity;GO:0005515::protein binding;GO:0006357::regulation of transcription from RNA polymerase II promoter;GO:0006413::translational initiation;GO:0016592::mediator complex
NC_037648.1	12025498	12025875	12025653;12025664;12025678	279	362	448	135	159	118	3.542	4.70448	6.37131	1.89176	2.168	2.06227	2.11068	2.80341	3.79668	1.1273	1.29192	1.22891	1.25564	0.0733983	1	+	+	+	-	-	-	Exon (XM_006566322.3/410320, exon 2 of 15)	11956327	12051973	95647	2	410320	#NAME?	26098	GO:0001104::RNA polymerase II transcription cofactor activity;GO:0003743::translation initiation factor activity;GO:0005515::protein binding;GO:0006357::regulation of transcription from RNA polymerase II promoter;GO:0006413::translational initiation;GO:0016592::mediator complex
NC_037648.1	12031064	12032115	12031243;12031577;12031228;12031576;12031926;12031230;12031945	473	742	748	375	469	209	5.9961	9.62928	10.6283	5.23016	6.3685	3.6393	1.28387	2.06179	2.2757	1.11987	1.3636	0.779235	0.78485	0.103312	1	+	+	+	-	-	-	Intron (XM_006566322.3/410320, intron 1 of 14)	11956327	12051973	95647	2	410320	#NAME?	19858	GO:0001104::RNA polymerase II transcription cofactor activity;GO:0003743::translation initiation factor activity;GO:0005515::protein binding;GO:0006357::regulation of transcription from RNA polymerase II promoter;GO:0006413::translational initiation;GO:0016592::mediator complex
NC_037648.1	12083408	12083669	12083541;12083544;12083537	490	466	414	280	373	237	6.21115	6.05232	5.88885	3.90871	5.0677	4.12454	5.33995	5.2034	5.06286	3.36046	4.35689	3.54602	0.470483	0.034834	1	+	+	+	-	-	-	Intron (XM_003250871.4/410322, intron 1 of 6)	12052101	12089360	37260	2	410322	#NAME?	5691	GO:0003968::RNA-directed RNA polymerase activity;GO:0004197::cysteine-type endopeptidase activity;GO:0005085::guanyl-nucleotide exchange factor activity;GO:0007165::signal transduction;GO:0007264::small GTPase mediated signal transduction;GO:0017111::nucleoside-triphosphatase activity
NC_037648.1	12067128	12067482	12067315;12067309;12067309	679	629	697	342	334	265	8.602	8.1648	9.90462	4.77113	4.53925	4.60978	5.45805	5.18064	6.28458	3.02733	2.8802	2.92495	0.938119	0.0136005	1	+	+	+	-	-	-	5' UTR	12052101	12077540	25440	2	410322	#NAME?	10058	GO:0003968::RNA-directed RNA polymerase activity;GO:0004197::cysteine-type endopeptidase activity;GO:0005085::guanyl-nucleotide exchange factor activity;GO:0007165::signal transduction;GO:0007264::small GTPase mediated signal transduction;GO:0017111::nucleoside-triphosphatase activity
NC_037648.1	12159428	12160009	12159590;12159822;12159636;12159680	346	595	614	200	239	187	4.38955	7.72416	8.72685	2.79591	3.252	3.25804	1.69888	2.98947	3.37754	1.0821	1.25862	1.26096	1.16317	0.0973135	1	+	+	+	-	-	-	Exon (XM_026443844.1/410323, exon 10 of 24)	12152637	12165950	13314	2	410323	#NAME?	5941	GO:0003723::RNA binding;GO:0003724::RNA helicase activity;GO:0003777::microtubule motor activity;GO:0005524::ATP binding;GO:0006355::regulation of transcription, DNA-templated;GO:0007018::microtubule-based movement;GO:0008134::transcription factor binding;GO:0016887::ATPase activity;GO:0030286::dynein complex
NC_037648.1	12160929	12161492	12160992;12161293;12161413;12161188;12160998	307	439	486	178	176	169	3.8962	5.7024	6.91053	2.48989	2.39835	2.9461	1.55607	2.27743	2.75993	0.994415	0.957855	1.17662	1.07538	0.0758102	1	+	+	+	-	-	-	Exon (XM_026443844.1/410323, exon 8 of 24)	12152637	12165950	13314	2	410323	#NAME?	4458	GO:0003723::RNA binding;GO:0003724::RNA helicase activity;GO:0003777::microtubule motor activity;GO:0005524::ATP binding;GO:0006355::regulation of transcription, DNA-templated;GO:0007018::microtubule-based movement;GO:0008134::transcription factor binding;GO:0016887::ATPase activity;GO:0030286::dynein complex
NC_037648.1	12163858	12165085	12163956;12164274;12164531;12164996;12164061;12164478;12164963;12164013	603	935	1123	448	455	328	7.6406	12.1306	15.9496	6.24559	6.1788	5.70157	1.40151	2.2251	2.92562	1.14562	1.13337	1.04583	0.978707	0.133889	1	+	+	+	-	-	-	Promoter (<=1kb)	12152637	12165950	13314	2	410323	#NAME?	865	GO:0003723::RNA binding;GO:0003724::RNA helicase activity;GO:0003777::microtubule motor activity;GO:0005524::ATP binding;GO:0006355::regulation of transcription, DNA-templated;GO:0007018::microtubule-based movement;GO:0008134::transcription factor binding;GO:0016887::ATPase activity;GO:0030286::dynein complex
NC_037648.1	12425421	12426533	12425528;12425527;12425908;12425926;12426417;12425933	814	909	922	575	317	369	10.3097	11.7936	13.0974	8.01216	4.3089	6.4121	2.0865	2.38681	2.65067	1.62151	0.872043	1.29769	0.91001	0.017372	1	+	+	+	-	-	-	Promoter (<=1kb)	12424018	12427382	3365	2	410330	#NAME?	849	GO:0006659::phosphatidylserine biosynthetic process
NC_037648.1	12514593	12514865	12514728;12514732;12514718	951	741	584	237	323	186	12.0428	9.61632	8.30115	3.31058	4.3902	3.24071	9.93645	7.93438	6.84924	2.73154	3.62233	2.67389	1.45324	0.0197987	1	+	+	+	-	-	-	Promoter (<=1kb)	12501102	12514762	13661	2	410332	#NAME?	0	GO:0005085::guanyl-nucleotide exchange factor activity;GO:0007264::small GTPase mediated signal transduction;GO:0008537::proteasome activator complex
NC_037648.1	12731407	12731902	12731526;12731753;12731540;12731550	314	393	425	140	188	103	3.98475	5.10624	6.04494	1.96131	2.56095	1.80232	1.80961	2.31892	2.74522	0.890699	1.16302	0.818496	1.25894	0.026477	1	+	+	+	-	-	-	Distal Intergenic	12712072	12721511	9440	2	410334	#NAME?	-9896	GO:0003677::DNA binding;GO:0006355::regulation of transcription, DNA-templated
NC_037648.1	12722807	12723170	12723028;12723034;12723049	238	327	329	125	148	94	3.02335	4.25088	4.6827	1.75266	2.01895	1.64635	1.87091	2.63053	2.89775	1.08458	1.24937	1.0188	1.14203	0.0425959	1	+	+	+	-	-	-	Promoter (1-2kb)	12712072	12721511	9440	2	410334	#NAME?	-1296	GO:0003677::DNA binding;GO:0006355::regulation of transcription, DNA-templated
NC_037648.1	12883676	12884055	12883854;12883876;12883893	707	839	785	588	599	524	8.9562	10.8864	11.1533	8.19299	8.13	9.09825	5.30893	6.45308	6.61129	4.85652	4.81918	5.39313	0.286043	0.0985932	1	+	+	+	-	-	-	Promoter (<=1kb)	12873950	12883885	9936	2	410337	NM_001126243.2	0	GO:0006508::proteolysis;GO:0008236::serine-type peptidase activity;GO:0016787::hydrolase activity
NC_037648.1	13245231	13245545	13245380;13245370;13245372	489	477	455	307	291	191	6.1985	6.19488	6.47064	4.28428	3.9566	3.32736	4.43244	4.42985	4.62704	3.06361	2.82929	2.37934	0.705468	0.00796484	1	+	+	+	-	-	-	Intron (XM_393827.7/410347, intron 2 of 2)	13241440	13251327	9888	1	410347	#NAME?	3791	GO:0003713::transcription coactivator activity;GO:0005634::nucleus
NC_037649.1	428770	429436	428857;429180;429086;429286	393	511	468	289	299	212	4.9841	6.63552	6.65511	4.0339	4.065	3.69129	1.68317	2.24086	2.24748	1.36228	1.37278	1.24658	0.632263	0.0540677	1	+	+	+	-	-	-	Intron (XM_016915455.2/410353, intron 2 of 11)	360870	576852	215983	1	410353	#NAME?	67900	GO:0003676::nucleic acid binding;GO:0003723::RNA binding;GO:0004535::poly(A)-specific ribonuclease activity;GO:0005634::nucleus;GO:0005737::cytoplasm;GO:0006402::mRNA catabolic process;GO:0008948::oxaloacetate decarboxylase activity;GO:0015081::sodium ion transmembrane transporter activity;GO:0016020::membrane;GO:0046872::metal ion binding;GO:0071436::sodium ion export
NC_037649.1	2054548	2054774	2054663;2054663;2054667	433	384	266	241	330	278	5.4901	4.9896	3.78873	3.36622	4.48505	4.83507	5.4478	4.95115	3.75954	3.34028	4.45049	4.79781	0.169551	0.476917	1	+	+	+	-	-	-	Promoter (<=1kb)	2054609	2056686	2078	1	410355	#NAME?	0	GO:0044237::cellular metabolic process
NC_037649.1	6751497	6752510	6751818;6752045;6752370;6751769;6752013;6751784;6752094;6752372	860	1087	1156	732	701	417	10.8917	14.1005	16.4178	10.196	9.5121	7.24394	2.41949	3.1323	3.64707	2.26495	2.11303	1.60918	0.619585	0.0750323	1	+	+	+	-	-	-	Exon (XM_016915539.2/410363, exon 8 of 8)	6744576	6757060	12485	2	410363	#NAME?	4550	GO:0005886::plasma membrane;GO:0006810::transport;GO:0008168::methyltransferase activity
NC_037649.1	7053635	7053954	7053783;7053780;7053771	290	433	462	84	89	75	3.68115	5.62464	6.56997	1.18235	1.2195	1.31708	2.59119	3.95923	4.62466	0.832267	0.858417	0.927104	2.09387	0.0410539	1	+	+	+	-	-	-	Exon (XM_006562260.3/410368, exon 3 of 13)	7044915	7062744	17830	1	410368	#NAME?	8720	GO:0005509::calcium ion binding;GO:0007156::homophilic cell adhesion via plasma membrane adhesion molecules;GO:0016020::membrane
NC_037649.1	7057277	7057735	7057407;7057408;7057604;7057387;7057629	514	519	523	159	200	103	6.51475	6.7392	7.43556	2.2256	2.72355	1.80232	3.19707	3.30721	3.64895	1.0922	1.33656	0.884475	1.61563	0.000271149	1	+	+	+	-	-	-	Exon (XM_006562260.3/410368, exon 6 of 13)	7044915	7062744	17830	1	410368	#NAME?	12362	GO:0005509::calcium ion binding;GO:0007156::homophilic cell adhesion via plasma membrane adhesion molecules;GO:0016020::membrane
NC_037649.1	7055501	7056177	7055663;7056032;7055662;7056041;7055720;7056041	615	963	922	225	268	178	7.7924	12.4934	13.0974	3.14366	3.64495	3.10207	2.59268	4.15679	4.35776	1.04596	1.21274	1.03212	1.75498	0.0416114	1	+	+	+	-	-	-	Exon (XM_006562260.3/410368, exon 5 of 13)	7044915	7062744	17830	1	410368	#NAME?	10586	GO:0005509::calcium ion binding;GO:0007156::homophilic cell adhesion via plasma membrane adhesion molecules;GO:0016020::membrane
NC_037649.1	8462061	8462447	8462270;8462306;8462310	298	391	409	260	196	143	3.78235	5.08032	5.8179	3.63051	2.66935	2.49552	2.20149	2.95697	3.38627	2.11312	1.55368	1.4525	0.73909	0.059935	1	+	+	+	-	-	-	5' UTR	8458713	8468219	9507	1	410373	#NAME?	3348	GO:0005515::protein binding
NC_037648.1	625506	626183	625840;625959;625804;626002	478	711	688	389	318	250	6.05935	9.22752	9.77691	5.4249	4.32245	4.34983	2.01309	3.06564	3.24817	1.80231	1.43604	1.44514	0.830197	0.0762425	1	+	+	+	-	-	-	Promoter (1-2kb)	627865	662800	34936	1	410375	#NAME?	-1682	.
NC_037649.1	11383924	11384471	11384223;11384223;11384229	889	1037	957	409	264	287	11.2585	13.4525	13.594	5.7031	3.59075	4.99104	4.62771	5.52954	5.5877	2.34421	1.47595	2.05153	1.42304	0.00142075	1	+	+	+	-	-	-	Promoter (1-2kb)	11380027	11385728	5702	2	410383	#NAME?	1257	GO:0003676::nucleic acid binding;GO:0003723::RNA binding;GO:0006396::RNA processing
NC_037649.1	11382684	11383037	11382911;11382860;11382872	536	604	578	246	147	158	6.79305	7.8408	8.21601	3.43577	2.0054	2.75547	4.32243	4.98912	5.22786	2.18619	1.27604	1.75331	1.47908	0.0011912	1	+	+	+	-	-	-	Promoter (2-3kb)	11380027	11385728	5702	2	410383	#NAME?	2691	GO:0003676::nucleic acid binding;GO:0003723::RNA binding;GO:0006396::RNA processing
NC_037649.1	9139042	9139325	9139146;9139160;9139167	278	224	240	177	174	184	3.52935	2.916	3.41979	2.47598	2.37125	3.20605	2.79926	2.31279	2.71236	1.96379	1.88073	2.54284	0.292763	0.142437	1	+	+	+	-	-	-	Promoter (<=1kb)	9139066	9141431	2366	1	410385	#NAME?	0	.
NC_037649.1	9108587	9108927	9108756;9108761;9108771	705	453	389	173	246	151	8.9309	5.88384	5.5341	2.42034	3.34685	2.63416	5.89939	3.88663	3.6556	1.59878	2.21079	1.74002	1.27625	0.0581163	1	+	+	+	-	-	-	Intron (XM_006566963.3/410386, intron 1 of 14)	9086896	9131953	45058	2	410386	#NAME?	23026	GO:0003857::3-hydroxyacyl-CoA dehydrogenase activity;GO:0004222::metalloendopeptidase activity;GO:0004252::serine-type endopeptidase activity;GO:0004519::endonuclease activity;GO:0005509::calcium ion binding;GO:0005515::protein binding;GO:0005516::calmodulin binding;GO:0005634::nucleus;GO:0005886::plasma membrane;GO:0006302::double-strand break repair;GO:0006508::proteolysis;GO:0006631::fatty aci…
NC_037649.1	9116482	9116904	9116770;9116702;9116695	231	276	307	171	162	116	2.9348	3.58992	4.37052	2.39252	2.20865	2.02761	1.5628	1.91166	2.32734	1.27404	1.17612	1.07972	0.716883	0.0676802	1	+	+	+	-	-	-	Intron (XM_006566963.3/410386, intron 1 of 14)	9086896	9131953	45058	2	410386	#NAME?	15049	GO:0003857::3-hydroxyacyl-CoA dehydrogenase activity;GO:0004222::metalloendopeptidase activity;GO:0004252::serine-type endopeptidase activity;GO:0004519::endonuclease activity;GO:0005509::calcium ion binding;GO:0005515::protein binding;GO:0005516::calmodulin binding;GO:0005634::nucleus;GO:0005886::plasma membrane;GO:0006302::double-strand break repair;GO:0006508::proteolysis;GO:0006631::fatty aci…
NC_037649.1	10555748	10556120	10555924;10555913;10556020	257	231	265	122	151	94	3.2637	3.00672	3.77454	1.71093	2.0596	1.64635	1.97092	1.81573	2.27941	1.03321	1.24377	0.994214	0.890938	0.00812714	1	+	+	+	-	-	-	Intron (XM_006566897.3/100576484, intron 2 of 4)	10493582	10549381	55800	2	410393	#NAME?	-6367	GO:0003824::catalytic activity;GO:0006355::regulation of transcription, DNA-templated;GO:0008152::metabolic process;GO:0016791::phosphatase activity;GO:0046872::metal ion binding
NC_037649.1	10827889	10828638	10828250;10828481;10828287;10828293;10828437	2341	2353	2225	1210	2006	2627	29.6263	30.5078	31.5869	16.845	27.1948	45.5432	8.8978	9.16255	9.48664	5.05913	8.16754	13.6782	0.0340271	0.940126	1	+	+	+	-	-	-	Promoter (<=1kb)	10759854	10829510	69657	2	410398	#NAME?	872	GO:0003676::nucleic acid binding;GO:0003723::RNA binding;GO:0005787::signal peptidase complex;GO:0006465::signal peptide processing;GO:0008233::peptidase activity;GO:0008565::protein transporter activity;GO:0015031::protein transport;GO:0016021::integral component of membrane
NC_037649.1	10769327	10770186	10769505;10769809;10769526;10769768;10769521;10769771	1474	2065	2074	897	920	952	18.6588	26.7754	29.4443	12.4912	12.4795	16.5155	4.88711	7.013	7.71204	3.27169	3.26863	4.32573	0.85192	0.0592565	1	+	+	+	-	-	-	Intron (XM_026444173.1/410398, intron 1 of 6)	10759854	10776387	16534	2	410398	#NAME?	6201	GO:0003676::nucleic acid binding;GO:0003723::RNA binding;GO:0005787::signal peptidase complex;GO:0006465::signal peptide processing;GO:0008233::peptidase activity;GO:0008565::protein transporter activity;GO:0015031::protein transport;GO:0016021::integral component of membrane
NC_037649.1	10836668	10836912	10836780;10836792;10836785	214	258	228	150	124	49	2.71975	3.35664	3.24951	2.10041	1.69375	0.8665	2.50051	3.08607	2.98757	1.9311	1.55722	0.796653	1.00071	0.031257	1	+	+	+	-	-	-	Distal Intergenic	10759854	10829510	69657	2	410398	#NAME?	-7158	GO:0003676::nucleic acid binding;GO:0003723::RNA binding;GO:0005787::signal peptidase complex;GO:0006465::signal peptide processing;GO:0008233::peptidase activity;GO:0008565::protein transporter activity;GO:0015031::protein transport;GO:0016021::integral component of membrane
NC_037650.1	10492643	10493085	10492824;10492820;10492820	441	617	552	324	283	188	5.5913	8.00928	7.84707	4.52075	3.8482	3.27537	2.84299	4.07245	3.98998	2.29865	1.95668	1.66542	0.881193	0.0357049	1	+	+	+	-	-	-	Exon (XM_026444812.1/724962, exon 6 of 15)	10465212	10467520	2309	1	410399	#NAME?	27431	.
NC_037650.1	2520871	2521644	2520953;2521384;2521421;2521343	1455	1494	1472	962	978	751	18.4184	19.3752	20.9019	13.3953	13.2654	13.0322	5.36016	5.63861	6.08291	3.89832	3.86052	3.79265	0.564369	0.0114579	1	+	+	+	-	-	-	Promoter (1-2kb)	2519228	2524033	4806	1	410405	#NAME?	1643	GO:0005506::iron ion binding;GO:0016705::oxidoreductase activity, acting on paired donors, with incorporation or reduction of molecular oxygen;GO:0020037::heme binding;GO:0055114::oxidation-reduction process
NC_037650.1	2804292	2804692	2804472;2804459;2804451	541	693	802	282	267	340	6.8563	8.99424	11.3946	3.93653	3.6314	5.90953	3.85134	5.05227	6.40061	2.21124	2.03984	3.31952	1.01545	0.0522754	1	+	+	+	-	-	-	Exon (XM_026444699.1/410408, exon 10 of 25)	2798881	2815667	16787	1	410408	#NAME?	5411	GO:0005524::ATP binding;GO:0006520::cellular amino acid metabolic process;GO:0006541::glutamine metabolic process;GO:0008218::bioluminescence;GO:0008716::D-alanine-D-alanine ligase activity;GO:0016597::amino acid binding;GO:0016743::carboxyl- or carbamoyltransferase activity;GO:0016787::hydrolase activity;GO:0046872::metal ion binding;GO:0047474::long-chain fatty acid luciferin component ligase a…
NC_037650.1	3726151	3727071	3726308;3726662;3726921;3726321;3726317;3726834;3726939	995	1288	1254	629	572	387	12.5994	16.7054	17.8085	8.7633	7.76415	6.72404	3.08146	4.08567	4.35546	2.14326	1.89889	1.64451	1.01881	0.0260713	1	+	+	+	-	-	-	Promoter (<=1kb)	3727672	3734106	6435	1	410417	#NAME?	-601	GO:0004725::protein tyrosine phosphatase activity;GO:0005515::protein binding;GO:0006470::protein dephosphorylation;GO:0008138::protein tyrosine/serine/threonine phosphatase activity;GO:0009229::thiamine diphosphate biosynthetic process;GO:0030975::thiamine binding
NC_037650.1	3828801	3829045	3828907;3828927;3828928	265	296	252	137	148	87	3.3649	3.84912	3.59007	1.91958	2.01895	1.52504	3.09366	3.53885	3.30068	1.76485	1.85621	1.40211	0.983662	0.00100604	1	+	+	+	-	-	-	3' UTR	3824060	3832718	8659	1	410423	#NAME?	4741	GO:0004930::G-protein coupled receptor activity;GO:0006810::transport;GO:0007186::G-protein coupled receptor signaling pathway;GO:0016020::membrane;GO:0016021::integral component of membrane
NC_037650.1	3836326	3836747	3836502;3836465;3836451	365	316	331	273	250	164	4.6299	4.10832	4.71108	3.81134	3.40105	2.85945	2.4713	2.1929	2.51463	2.03438	1.81538	1.52629	0.417204	0.0338512	1	+	+	+	-	-	-	Exon (XM_006558479.3/410424, exon 3 of 8)	3832893	3846553	13661	2	410424	#NAME?	9806	GO:0016021::integral component of membrane
NC_037650.1	3842894	3843144	3843020;3843023;3843031	640	478	451	524	441	269	8.10865	6.20784	6.41388	7.30275	5.9891	4.6791	7.27682	5.571	5.7559	6.55359	5.3747	4.19909	0.206079	0.398177	1	+	+	+	-	-	-	Intron (XM_006558479.3/410424, intron 1 of 7)	3832893	3846553	13661	2	410424	#NAME?	3409	GO:0016021::integral component of membrane
NC_037650.1	3953030	3953462	3953245;3953258;3953262	984	1060	1020	648	512	433	12.4603	13.7506	14.488	9.02759	6.95115	7.52122	6.48197	7.1532	7.5368	4.69624	3.61606	3.91261	0.792332	0.00261736	1	+	+	+	-	-	-	Intron (XM_016915742.2/410427, intron 1 of 9)	3880389	3958542	78154	2	410427	#NAME?	5080	GO:0004672::protein kinase activity;GO:0005524::ATP binding;GO:0006468::protein phosphorylation
NC_037650.1	5073545	5074167	5073698;5073844;5073822	321	524	599	271	289	250	4.0733	6.804	8.514	3.78352	3.9295	4.34983	1.47274	2.46004	3.07831	1.36796	1.42074	1.57272	0.684839	0.197704	1	+	+	+	-	-	-	Intron (XM_026444737.1/410439, intron 2 of 7)	5078263	5154199	75937	1	410439	#NAME?	-4096	GO:0005515::protein binding;GO:0016021::integral component of membrane
NC_037650.1	5148649	5149351	5148796;5149079;5149001;5148869	356	518	749	217	252	243	4.51605	6.72624	10.6425	3.03238	3.42815	4.22852	1.447	2.15518	3.41	0.971616	1.09843	1.35488	1.03379	0.168405	1	+	+	+	-	-	-	Intron (XM_026444737.1/410439, intron 7 of 7)	5189849	5266775	76927	1	410442	#NAME?	-40498	GO:0003677::DNA binding;GO:0005198::structural molecule activity;GO:0005215::transporter activity;GO:0005524::ATP binding;GO:0005886::plasma membrane;GO:0006260::DNA replication;GO:0006355::regulation of transcription, DNA-templated;GO:0008134::transcription factor binding;GO:0015721::bile acid and bile salt transport;GO:0016887::ATPase activity;GO:0046982::protein heterodimerization activity
NC_037650.1	5732927	5733402	5733176;5733203;5733117	894	1404	1362	291	327	378	11.3217	18.2088	19.341	4.06172	4.4444	6.56807	5.35761	8.6167	9.15247	1.92207	2.10316	3.10812	1.69691	0.0364324	1	+	+	+	-	-	-	3' UTR	5728180	5734276	6097	1	410447	#NAME?	4747	GO:0000221::vacuolar proton-transporting V-type ATPase, V1 domain;GO:0005515::protein binding;GO:0006886::intracellular protein transport;GO:0008536::Ran GTPase binding;GO:0015991::ATP hydrolysis coupled proton transport;GO:0016192::vesicle-mediated transport;GO:0016820::hydrolase activity, acting on acid anhydrides, catalyzing transmembrane movement of substances;GO:0030117::membrane coat
NC_037650.1	5988667	5989012	5988759;5988780;5988775	858	703	583	811	626	390	10.8664	9.12384	8.28696	11.2949	8.49585	6.77603	7.07418	5.93975	5.39493	7.35314	5.53092	4.41129	0.0900159	0.731143	1	+	+	+	-	-	-	Promoter (<=1kb)	5988748	5992223	3476	1	410452	#NAME?	0	GO:0004180::carboxypeptidase activity;GO:0004181::metallocarboxypeptidase activity;GO:0004674::protein serine/threonine kinase activity;GO:0006508::proteolysis;GO:0008270::zinc ion binding
NC_037650.1	7107957	7108325	7108152;7108174;7108159	250	381	292	92	136	114	3.17515	4.95072	4.15767	1.29363	1.85635	1.99295	1.93823	3.0221	2.53799	0.789678	1.13318	1.21657	1.25606	0.0294489	1	+	+	+	-	-	-	Distal Intergenic	7091993	7096588	4596	2	410464	#NAME?	-11369	GO:0003677::DNA binding;GO:0008270::zinc ion binding;GO:0046872::metal ion binding
NC_037650.1	7119462	7119793	7119621;7119624;7119627	240	374	230	81	135	59	3.04865	4.86	3.27789	1.14062	1.8428	1.0398	2.06841	3.29735	2.22394	0.773872	1.25028	0.705469	1.47534	0.0362661	1	+	+	+	-	-	-	Distal Intergenic	7091993	7096588	4596	2	410464	#NAME?	-22874	GO:0003677::DNA binding;GO:0008270::zinc ion binding;GO:0046872::metal ion binding
NC_037650.1	7118250	7118840	7118594;7118619;7118461;7118671	378	601	355	193	247	185	4.79435	7.80192	5.05164	2.69854	3.3604	3.22338	1.8273	2.97359	1.92536	1.02851	1.28077	1.22854	0.92694	0.0955853	1	+	+	+	-	-	-	Distal Intergenic	7091993	7096588	4596	2	410464	#NAME?	-21662	GO:0003677::DNA binding;GO:0008270::zinc ion binding;GO:0046872::metal ion binding
NC_037650.1	7117740	7118132	7117914;7117895;7117950	231	444	265	112	164	73	2.9348	5.7672	3.77454	1.57183	2.23575	1.28242	1.6821	3.30551	2.16341	0.900906	1.28144	0.735029	1.29348	0.0869854	1	+	+	+	-	-	-	Distal Intergenic	7091993	7096588	4596	2	410464	#NAME?	-21152	GO:0003677::DNA binding;GO:0008270::zinc ion binding;GO:0046872::metal ion binding
NC_037650.1	8263636	8264171	8263713;8263984;8264024;8264031	410	419	406	323	352	186	5.19915	5.4432	5.77533	4.50684	4.78315	3.24071	2.18491	2.28747	2.42705	1.89397	2.01009	1.36189	0.389783	0.0993126	1	+	+	+	-	-	-	Distal Intergenic	8230305	8238301	7997	2	410467	#NAME?	-25335	GO:0004930::G-protein coupled receptor activity;GO:0005576::extracellular region;GO:0005789::endoplasmic reticulum membrane;GO:0010181::FMN binding;GO:0016020::membrane;GO:0030414::peptidase inhibitor activity
NC_037650.1	8265516	8265889	8265689;8265707;8265691	383	517	513	310	340	199	4.8576	6.71328	7.29366	4.32601	4.62055	3.466	2.92561	4.04324	4.39279	2.60545	2.78284	2.08749	0.603876	0.0814956	1	+	+	+	-	-	-	Distal Intergenic	8230305	8238301	7997	2	410467	#NAME?	-27215	GO:0004930::G-protein coupled receptor activity;GO:0005576::extracellular region;GO:0005789::endoplasmic reticulum membrane;GO:0010181::FMN binding;GO:0016020::membrane;GO:0030414::peptidase inhibitor activity
NC_037650.1	8234582	8235357	8234694;8235166;8235166;8235019;8235175	429	717	696	298	340	251	5.4395	9.30528	9.89043	4.15909	4.62055	4.36716	1.57893	2.70106	2.87091	1.20727	1.34122	1.26766	0.90601	0.109911	1	+	+	+	-	-	-	Promoter (2-3kb)	8230305	8238301	7997	2	410467	#NAME?	2944	GO:0004930::G-protein coupled receptor activity;GO:0005576::extracellular region;GO:0005789::endoplasmic reticulum membrane;GO:0010181::FMN binding;GO:0016020::membrane;GO:0030414::peptidase inhibitor activity
NC_037650.1	8231864	8232806	8232284;8232617;8232248;8232581;8232602	438	694	747	312	319	224	5.55335	9.0072	10.6141	4.35383	4.336	3.89925	1.32651	2.15152	2.53535	1.03998	1.03572	0.931399	0.999799	0.105332	1	+	+	+	-	-	-	3' UTR	8230305	8238301	7997	2	410467	#NAME?	5495	GO:0004930::G-protein coupled receptor activity;GO:0005576::extracellular region;GO:0005789::endoplasmic reticulum membrane;GO:0010181::FMN binding;GO:0016020::membrane;GO:0030414::peptidase inhibitor activity
NC_037650.1	8421373	8421782	8421609;8421623;8421533;8421674	275	341	344	170	225	130	3.4914	4.43232	4.89555	2.37861	3.0623	2.27023	1.91815	2.43508	2.68958	1.30679	1.6824	1.24725	0.733298	0.0334609	1	+	+	+	-	-	-	Intron (XR_003305984.1/102655449, intron 3 of 5)	8361770	8365083	3314	1	410468	#NAME?	59603	GO:0003677::DNA binding;GO:0006355::regulation of transcription, DNA-templated;GO:0046983::protein dimerization activity
[truncated: 3,802 more rows]

## Sheet: unique peaks for 4W
Chromosome	PeakStart	PeakEnd	oriSummitPos	Count_4Q1	Count_4Q2	Count_4Q3	Count_4w1	Count_4w2	Count_4w3	RPM_4Q1	RPM_4Q2	RPM_4Q3	RPM_4w1	RPM_4w2	RPM_4w3	FoldEnrich_4Q1	FoldEnrich_4Q2	FoldEnrich_4Q3	FoldEnrich_4w1	FoldEnrich_4w2	FoldEnrich_4w3	log2foldchange	pvalue	qvalue	In_4Q1	In_4Q2	In_4Q3	In_4w1	In_4w2	In_4w3	annotation	geneStart	geneEnd	geneLength	geneStrand	geneId	transcriptId	distanceToTSS	ClosestTSS_GO
[truncated: 448 more rows]
